# Supplementary material for: Polysaccharide breakdown products drive degradation-dispersal cycles of foraging bacteria through changes in metabolism and motility
Source: eLife. 2024 Oct 21;13:RP93855. doi: 10.7554/eLife.93855 (PMC11493405; doi:10.7554/eLife.93855)
Supplement: Supplementary file 2. — Performed on all gene sets of KEGG category C (KEGG pathways and KEGG BRITE categories) by Gene Set Enrichment Analysis algorithm (GSEA) (Prouty et al., 2001). Method: fgsea() function and described filtering (see Materials and Methods); KEGG_hierarchy: ID of KEGG category C; KEGG_entry: KEGG pathway or KEGG BRITE category; Description: Description of the KEGG category; pval: enrichment p-value of GSEA; padj: BH-adjusted p-value of GSEA; log2err: the expected error for the standard deviation of the p-value logarithm, ES: enrichment score, same as in Broad GSEA implementation; NES: normalized enrichment score, normalized to mean enrichment of random samples of the same size; size: size of gene set after removing genes not present in the genome of V. cyclitrophicus ZF270; Genes_total_ZF270: number of genes of V. cyclitrophicus ZF270 within the gene set, counting gene duplicates. [file elife-93855-supp2.xlsx]

## Sheet: Supplement_Tables_GSEA
Method	KEGG_hierarchy	KEGG_entry	Description	pval	padj	log2err	ES	NES	size	Genes_total_ZF270
fgsea(), pathways with padj < 0.05, min. 5 genes per gene set	map00290	Pathway	Valine, leucine and isoleucine biosynthesis	3.31285e-05	0.00156808	0.407945	-0.806462	-2.20733	13	14
fgsea(), pathways with padj < 0.05, min. 5 genes per gene set	map00640	Pathway	Propanoate metabolism	4.83096e-05	0.00171499	0.35511	-0.658461	-2.16377	25	28
fgsea(), pathways with padj < 0.05, min. 5 genes per gene set	ko03000	BRITE	Transcription factors	0.00329893	0.0312299	0.0504374	-0.366785	-1.58723	87	117
fgsea(), pathways with padj < 0.05, min. 5 genes per gene set	map02010	Pathway	ABC transporters	0.00103583	0.0142322	0.0504683	0.419086	1.64065	122	162
fgsea(), pathways with padj < 0.05, min. 5 genes per gene set	ko99980	BRITE	Enzymes with EC numbers	0.00154087	0.0182337	0.0421619	0.440891	1.6617	93	116
fgsea(), pathways with padj < 0.05, min. 5 genes per gene set	map02024	Pathway	Quorum sensing	0.00266598	0.0270406	0.0337726	0.531796	1.73714	41	60
fgsea(), pathways with padj < 0.05, min. 5 genes per gene set	map03070	Pathway	Bacterial secretion system	0.00443458	0.0393569	0.0268186	0.58613	1.73859	26	29
fgsea(), pathways with padj < 0.05, min. 5 genes per gene set	map05132	Pathway	Salmonella infection	0.000611352	0.00964578	0.0781703	0.917558	1.76049	5	11
fgsea(), pathways with padj < 0.05, min. 5 genes per gene set	ko02035	BRITE	Bacterial motility proteins	0.000608808	0.00964578	0.0681837	0.485264	1.76469	74	118
fgsea(), pathways with padj < 0.05, min. 5 genes per gene set	map00195	Pathway	Photosynthesis	0.00198567	0.0216896	0.0424537	0.815061	1.7882	8	16
fgsea(), pathways with padj < 0.05, min. 5 genes per gene set	ko00194	BRITE	Photosynthesis proteins	0.00110249	0.0142322	0.0566779	0.809166	1.83497	9	17
fgsea(), pathways with padj < 0.05, min. 5 genes per gene set	ko02000	BRITE	Transporters	6.4018e-09	4.54528e-07	0.761461	0.427087	1.85529	342	502
fgsea(), pathways with padj < 0.05, min. 5 genes per gene set	map03010	Pathway	Ribosome	0.000230662	0.00545899	0.113165	0.543689	1.87218	54	56
fgsea(), pathways with padj < 0.05, min. 5 genes per gene set	ko3011	BRITE	Ribosome	0.000230662	0.00545899	0.113165	0.543689	1.87218	54	56
fgsea(), pathways with padj < 0.05, min. 5 genes per gene set	map01501	Pathway	beta-Lactam resistance	0.000284019	0.00576152	0.109204	0.75311	1.9569	15	24
fgsea(), pathways with padj < 0.05, min. 5 genes per gene set	ko02044	BRITE	Secretion system	6.96856e-11	9.89535e-09	0.839089	0.622419	2.35674	96	125
fgsea(), pathways with padj < 0.05, min. 5 genes per gene set, only bacterial pathways, duplicates removed	map00290	Pathway	Valine, leucine and isoleucine biosynthesis	3.31285e-05	0.00156808	0.407945	-0.806462	-2.20733	13	14
fgsea(), pathways with padj < 0.05, min. 5 genes per gene set, only bacterial pathways, duplicates removed	map00640	Pathway	Propanoate metabolism	4.83096e-05	0.00171499	0.35511	-0.658461	-2.16377	25	28
fgsea(), pathways with padj < 0.05, min. 5 genes per gene set, only bacterial pathways, duplicates removed	ko03000	BRITE	Transcription factors	0.00329893	0.0312299	0.0504374	-0.366785	-1.58723	87	117
fgsea(), pathways with padj < 0.05, min. 5 genes per gene set, only bacterial pathways, duplicates removed	map02010	Pathway	ABC transporters	0.00103583	0.0142322	0.0504683	0.419086	1.64065	122	162
fgsea(), pathways with padj < 0.05, min. 5 genes per gene set, only bacterial pathways, duplicates removed	ko99980	BRITE	Enzymes with EC numbers	0.00154087	0.0182337	0.0421619	0.440891	1.6617	93	116
fgsea(), pathways with padj < 0.05, min. 5 genes per gene set, only bacterial pathways, duplicates removed	map02024	Pathway	Quorum sensing	0.00266598	0.0270406	0.0337726	0.531796	1.73714	41	60
fgsea(), pathways with padj < 0.05, min. 5 genes per gene set, only bacterial pathways, duplicates removed	map03070	Pathway	Bacterial secretion system	0.00443458	0.0393569	0.0268186	0.58613	1.73859	26	29
fgsea(), pathways with padj < 0.05, min. 5 genes per gene set, only bacterial pathways, duplicates removed	ko02035	BRITE	Bacterial motility proteins	0.000608808	0.00964578	0.0681837	0.485264	1.76469	74	118
fgsea(), pathways with padj < 0.05, min. 5 genes per gene set, only bacterial pathways, duplicates removed	ko02000	BRITE	Transporters	6.4018e-09	4.54528e-07	0.761461	0.427087	1.85529	342	502
fgsea(), pathways with padj < 0.05, min. 5 genes per gene set, only bacterial pathways, duplicates removed	map03010	Pathway	Ribosome	0.000230662	0.00545899	0.113165	0.543689	1.87218	54	56
fgsea(), pathways with padj < 0.05, min. 5 genes per gene set, only bacterial pathways, duplicates removed	map01501	Pathway	beta-Lactam resistance	0.000284019	0.00576152	0.109204	0.75311	1.9569	15	24
fgsea(), pathways with padj < 0.05, min. 5 genes per gene set, only bacterial pathways, duplicates removed	ko02044	BRITE	Secretion system	6.96856e-11	9.89535e-09	0.839089	0.622419	2.35674	96	125
fgsea(). customGeneSet	NA	NA	pathway_Alg	0.0306714	0.0306714	0.0103558	0.586489	1.56563	NA	18
fgsea(). customGeneSet	NA	NA	pathway_Flag	0.0164921	0.0306714	0.0134322	0.485314	1.57093	NA	44
fgsea(). customGeneSet	NA	NA	pathway_Chem	0.0278594	0.0306714	0.0111719	0.673706	1.59026	NA	11
