# Supplementary material for: Polysaccharide breakdown products drive degradation-dispersal cycles of foraging bacteria through changes in metabolism and motility
Source: eLife. 2024 Oct 21;13:RP93855. doi: 10.7554/eLife.93855 (PMC11493405; doi:10.7554/eLife.93855)
Supplement: Supplementary file 3. [file elife-93855-supp3.xlsx]

## Sheet: Sheet 1
Geneid
