# Supplementary material for: Polysaccharide breakdown products drive degradation-dispersal cycles of foraging bacteria through changes in metabolism and motility
Source: eLife. 2024 Oct 21;13:RP93855. doi: 10.7554/eLife.93855 (PMC11493405; doi:10.7554/eLife.93855)
Supplement: Supplementary file 6. [file elife-93855-supp6.xlsx]

## Sheet: Sheet 1
Geneid	Chr	Start	End	Strand	Length	L1_raw	L2_raw	L3_raw	L4_raw	L5_raw	L6_raw	P1_raw	P2_raw	P3_raw	P4_raw	P5_raw	P6_raw	L1_DESeq	L2_DESeq	L3_DESeq	L4_DESeq	L5_DESeq	L6_DESeq	P1_DESeq	P2_DESeq	P3_DESeq	P4_DESeq	P5_DESeq	P6_DESeq	baseMean	log2FoldChange	lfcSE	stat	pvalue	padj	RASTtk_Annotation	RASTtk_Ontology_term	BlastKOALA_KO	BlastKOALA_KO_Definition	BlastKOALA_KO_Score	KEGG_pathway	KEGG_pathway_descr	KEGG_CategB	KEGG_CategA
D|1136176.5.peg.3228	2	328491	329852	+	1362	1496	1264.5	1185.5	1385	1216	1270.5	100	62.5	56	82	43	60.5	1008.11	884.447	836.454	1021.34	804.017	829.217	151.442	86.7248	73.6184	125.739	60.8665	89.8335	497.651	3.19968	0.166831	19.1792	5.53e-82	1.78e-80	IncF plasmid conjugative transfer pilus assembly protein TraH	NA	K12072	traH; conjugative transfer pilus assembly protein TraH	135	02044	Secretion system [BR:ko02044],	09183	09180
D|1136176.5.peg.459	1	513687	514160	-	474	191.5	174.5	167	165	177.5	166.5	23	18.5	22.5	30	25.5	21.5	128.709	121.751	117.88	121.676	117.032	108.386	34.8315	25.1782	28.9215	46.0021	35.3875	31.4417	76.4331	1.83449	0.142393	12.8833	5.59e-38	5.86e-37	Type IV pilin PilA	NA	K02650	pilA; type IV pilus assembly protein PilA	13	02020 02044 02035	Two-component system [PATH:ko02020], Secretion system [BR:ko02044], Bacterial motility proteins [BR:ko02035],	09132 09183	09130 09180
D|1136176.5.peg.2817	1	3238724	3239167	-	444	676	656	608	680	677	674	87	68	106	101	113	89	455.537	459.017	429.168	501.451	447.631	440.073	131.754	95.1175	139.349	154.874	159.951	133.253	295.598	1.74791	0.0910211	19.2033	3.47e-82	1.13e-80	General secretion pathway protein G	NA	K02456	gspG; general secretion pathway protein G	111	03070 05111 02044	Bacterial secretion system [PATH:ko03070], Biofilm formation - Vibrio cholerae [PATH:ko05111], Secretion system [BR:ko02044],	09131 09145 09183	09130 09140 09180
D|1136176.5.peg.4587	3	88715	89725	-	1011	339	262	265	288	275	327	57	63	31	57	54	30	228.442	183.327	187.055	212.379	181.83	213.507	86.3217	88.1236	40.753	87.4041	76.437	44.9168	135.875	1.51358	0.157579	9.60523	7.6e-22	4.32e-21	IncF plasmid conjugative transfer pilus assembly protein TraU	NA	K12060	traU; conjugal transfer pilus assembly protein TraU	274	02044	Secretion system [BR:ko02044],	09183	09180
D|1136176.5.peg.2604	1	2990514	2990864	-	351	326	314.5	329.5	313	337	346.5	49	71.5	62	53.5	58.5	64.5	219.682	219.712	232.231	230.815	222.824	225.913	74.2063	99.3139	81.5061	81.2704	82.099	95.8224	155.45	1.39243	0.0931383	14.9501	1.55e-50	2.37e-49	MSHA biogenesis protein MshP	NA	K12286	mshP; MSHA biogenesis protein MshP	13	02044	Secretion system [BR:ko02044],	09183	09180
D|1136176.5.peg.1641	1	1909120	1909887	+	768	37	31	26	30	28	35	8	3	5	7	5	8	24.9332	21.6913	18.3526	22.1228	18.5136	22.8524	12.1153	4.19636	6.57307	10.7338	7.0775	11.9778	15.095	1.30655	0.280314	4.66101	3.15e-06	6.84e-06	Type IV pilus (Tfp) assembly protein PilF	NA	K02656	pilF; type IV pilus assembly protein PilF	57	02044 02035	Secretion system [BR:ko02044], Bacterial motility proteins [BR:ko02035],	09183	09180
D|1136176.5.peg.4590	3	93266	93661	-	396	36	32.5	28.5	26.5	36	26.5	6	7	6.5	7.5	3.5	8.5	24.2594	22.3911	19.7643	19.1731	23.8031	16.9761	9.08649	9.79151	7.88769	10.7338	4.2465	11.9778	15.0076	1.24443	0.278316	4.47129	7.78e-06	1.64e-05	IncF plasmid conjugative transfer pilus assembly protein TraV	NA	K12064	traV; conjugal transfer pilus assembly protein TraV	13	02044	Secretion system [BR:ko02044],	09183	09180
D|1136176.5.peg.3226	2	327232	328041	+	810	541	473	452.5	465	478.5	477.5	82.5	92	105.5	112.5	107	101	364.564	330.968	319.052	342.904	316.053	311.446	124.182	128.688	138.035	171.741	151.458	151.22	237.526	1.19968	0.0845887	14.1825	1.18e-45	1.58e-44	IncF plasmid conjugative transfer pilus assembly protein TraF	NA	K12057	traF; conjugal transfer pilus assembly protein TraF	51	02044	Secretion system [BR:ko02044],	09183	09180
D|1136176.5.peg.2447	1	2796588	2797367	-	780	3693	3215.5	3111.5	3248.5	3284	3315	760	683	702.5	840.5	582	692.5	2488.61	2249.6	2195.96	2395.16	2171.37	2164.45	1150.96	955.372	922.859	1288.06	823.821	1036.08	1653.53	1.14636	0.0962019	11.9162	9.75e-33	8.14e-32	Thiol:disulfide interchange protein DsbC	NA	K03981	dsbC; thiol:disulfide interchange protein DsbC [EC:5.3.4.1]	74	03110 02044	Chaperones and folding catalysts [BR:ko03110], Secretion system [BR:ko02044],	09182 09183	09180
D|1136176.5.peg.3229	2	329865	332564	+	2700	1177	1053.5	1088	1095.5	1098	1124.5	263	244	245.5	250	219	224	793.147	736.806	767.985	807.483	725.996	733.89	398.291	341.304	322.081	383.351	309.994	335.379	554.642	1.12937	0.0650846	17.3524	1.89e-67	4.6e-66	IncF plasmid conjugative transfer protein TraG	NA	K12056	traG; conjugal transfer mating pair stabilization protein TraG	137	02044	Secretion system [BR:ko02044],	09183	09180
D|1136176.5.peg.3220	2	322463	322810	+	348	136.5	114.5	108	110	114.5	124	28	17.5	34	25	31	28	91.6465	79.7682	76.2338	81.117	75.3766	80.963	42.4036	23.7794	44.6969	38.3351	43.8805	41.9223	60.0102	1.04609	0.141231	7.40695	1.29e-13	4.65e-13	IncF plasmid conjugative transfer protein TrbI	NA	K12062	trbI; conjugal transfer pilin signal peptidase TrbI	12	02044	Secretion system [BR:ko02044],	09183	09180
D|1136176.5.peg.3728	2	871655	873448	-	1794	482.5	408	400.5	454	427	409	109.5	92	118	106.5	83	93.5	324.806	285.486	282.347	334.792	282.332	267.047	165.071	128.688	155.124	162.541	117.486	139.242	220.414	1.03438	0.0974699	10.6123	2.61e-26	1.75e-25	Protein-export membrane protein SecD (TC 3.A.5.1.1)	NA	K03072	secD; preprotein translocase subunit SecD	323	03060 03070 02044	Protein export [PATH:ko03060], Bacterial secretion system [PATH:ko03070], Secretion system [BR:ko02044],	09123 09131 09183	09120 09130 09180
D|1136176.5.peg.2612	1	2995780	2997504	-	1725	625	554.5	550.5	541.5	579	605.5	141.5	136	140.5	124	143.5	120	421.17	387.645	388.227	398.948	382.834	395.021	213.533	190.235	184.046	190.142	202.416	179.667	294.49	1.03413	0.0680836	15.1891	4.18e-52	6.8e-51	MSHA biogenesis protein MshE	NA	K12276	mshE; MSHA biogenesis protein MshE	364	05111 02044	Biofilm formation - Vibrio cholerae [PATH:ko05111], Secretion system [BR:ko02044],	09145 09183	09140 09180
D|1136176.5.peg.1946	1	2232694	2235045	-	2352	469	442.5	395	412.5	439.5	457.5	97.5	98	96.5	105	102	114.5	316.046	309.277	278.818	303.82	290.266	298.388	146.898	137.081	126.203	161.007	144.381	170.684	223.572	1.02447	0.0799442	12.8148	1.36e-37	1.39e-36	DNA internalization-related competence protein ComEC/Rec2	NA	K02238	comEC; competence protein ComEC	187	02044	Secretion system [BR:ko02044],	09183	09180
D|1136176.5.peg.2156	1	2465825	2466625	-	801	319	279	262.5	280	302.5	306.5	77	41.5	77	68	79.5	68.5	214.965	195.222	184.937	206.48	199.682	199.796	116.61	57.3503	101.225	104.272	111.824	101.811	149.515	1.02138	0.109846	9.29825	1.43e-20	7.72e-20	Flagellar assembly protein FliH	NA	K02411	fliH; flagellar assembly protein FliH	116	02040 02044 02035	Flagellar assembly [PATH:ko02040], Secretion system [BR:ko02044], Bacterial motility proteins [BR:ko02035],	09142 09183	09140 09180
D|1136176.5.peg.2611	1	2994544	2995767	-	1224	661.5	578.5	563.5	616	625	625	193.5	140	132	179.5	126	131.5	445.429	404.439	397.404	454.255	413.249	408.079	292.282	195.83	173.529	274.479	178.353	196.137	319.455	0.948398	0.120464	7.87287	3.47e-15	1.39e-14	MSHA biogenesis protein MshG	NA	K12278	mshG; MSHA biogenesis protein MshG	241	02044	Secretion system [BR:ko02044],	09183	09180
D|1136176.5.peg.4586	3	87747	88460	-	714	126	111	127	119	103	110	24	33	27	27	24	38	84.9078	77.669	89.6453	87.7539	68.1034	71.822	36.346	46.16	35.4946	41.4019	33.972	56.8946	60.8475	0.941038	0.145531	6.46624	1e-10	3.02e-10	IncF plasmid conjugative transfer protein TrbC	NA	K12059	trbC; conjugal transfer pilus assembly protein TrbC	19	02044	Secretion system [BR:ko02044],	09183	09180
D|1136176.5.peg.4593	3	95964	96539	-	576	69	66	73	77.5	83	74	17	14	16.5	23	18.5	23.5	46.4971	46.1816	51.5284	56.7819	54.8795	48.3166	25.7451	19.583	21.0338	35.2683	25.479	34.4362	38.8109	0.923837	0.169941	5.43621	5.44e-08	1.38e-07	IncF plasmid conjugative transfer pilus assembly protein TraE	NA	K12067	traE; conjugal transfer pilus assembly protein TraE	39	02044	Secretion system [BR:ko02044],	09183	09180
D|1136176.5.peg.2950	1	3393774	3395393	-	1620	1457	1367	1249	1321	1354	1441	342	352	374	359	330	327	981.831	956.518	881.629	974.142	895.262	940.868	517.93	492.373	491.666	550.492	467.115	489.593	719.952	0.905085	0.0535499	16.9017	4.37e-64	9.85e-63	Inner membrane protein translocase component YidC%2C long form	NA	K03217	yidC, spoIIIJ, OXA1, ccfA; YidC/Oxa1 family membrane protein insertase	363	03060 03070 02024 03029 02044	Protein export [PATH:ko03060], Bacterial secretion system [PATH:ko03070], Quorum sensing [PATH:ko02024], Mitochondrial biogenesis [BR:ko03029], Secretion system [BR:ko02044],	09123 09131 09145 09182 09183	09120 09130 09140 09180
D|1136176.5.peg.560	1	642119	642307	+	189	39258	37723	39432	38078	43818	40263	9768	11617	7645	13493	9689	8173	26454.8	26395.6	27833.8	28079.8	28972.4	26288.8	14792.8	16249.7	10050.2	20690.2	13714.8	12236.8	20980	0.902739	0.137159	6.58168	4.65e-11	1.43e-10	D01200762: hypothetical protein	NA	K02651	flp, pilA; pilus assembly protein Flp/PilA	14	04112 02044 02035	Cell cycle - Caulobacter [PATH:ko04112], Secretion system [BR:ko02044], Bacterial motility proteins [BR:ko02035],	09143 09183	09140 09180
D|1136176.5.peg.4588	3	89883	90614	-	732	109	90	90	91	106	80	34	11	31.5	20	20	34.5	73.452	62.9749	63.5281	67.1059	70.087	52.2342	51.4901	15.3867	40.753	30.6681	28.31	50.9057	50.5746	0.845068	0.186407	4.53345	5.8e-06	1.24e-05	IncF plasmid conjugative transfer pilus assembly protein TraW	NA	K12061	traW; conjugal transfer pilus assembly protein TraW	71	02044	Secretion system [BR:ko02044],	09183	09180
D|1136176.5.peg.3727	2	870714	871652	-	939	257.5	191	209.5	217	229	210	52.5	71	61	58.5	54	53.5	173.185	133.647	147.526	160.022	151.414	137.115	78.7496	99.3139	80.1915	88.9375	76.437	79.353	117.158	0.843534	0.108848	7.74967	9.21e-15	3.59e-14	Protein-export membrane protein SecF (TC 3.A.5.1.1)	NA	K03074	secF; preprotein translocase subunit SecF	127	03060 03070 02044	Protein export [PATH:ko03060], Bacterial secretion system [PATH:ko03070], Secretion system [BR:ko02044],	09123 09131 09183	09120 09130 09180
D|1136176.5.peg.2818	1	3239255	3240475	-	1221	614	634	570	570	631.5	679.5	133.5	167.5	185.5	135.5	198	173	413.757	443.623	402.345	420.334	417.216	443.337	201.417	233.597	243.204	207.01	280.269	259.02	330.427	0.832423	0.0739712	11.2533	2.23e-29	1.66e-28	General secretion pathway protein F	NA	K02455	gspF; general secretion pathway protein F	261	03070 05111 02044	Bacterial secretion system [PATH:ko03070], Biofilm formation - Vibrio cholerae [PATH:ko05111], Secretion system [BR:ko02044],	09131 09145 09183	09130 09140 09180
D|1136176.5.peg.2815	1	3237652	3238047	-	396	158.5	156	136	139.5	164	130.5	33.5	30.5	30.5	35.5	63.5	46.5	106.472	109.156	95.9981	102.502	108.437	84.8805	49.9757	41.9636	39.4384	53.6692	89.1765	68.8724	79.2118	0.827099	0.157689	5.24514	1.56e-07	3.82e-07	General secretion pathway protein I	NA	K02458	gspI; general secretion pathway protein I	30	03070 05111 02044	Bacterial secretion system [PATH:ko03070], Biofilm formation - Vibrio cholerae [PATH:ko05111], Secretion system [BR:ko02044],	09131 09145 09183	09130 09140 09180
D|1136176.5.peg.2820	1	3241979	3244003	-	2025	2991	2742.5	2738.5	2615.5	2994.5	2908.5	727	793.5	901.5	672	856	698.5	2015.55	1918.63	1932.67	1928.37	1979.63	1898.71	1100.98	1109.24	1184.47	1030.45	1211.67	1045.06	1529.62	0.803558	0.0441277	18.2098	4.31e-74	1.21e-72	General secretion pathway protein D	NA	K02453	gspD; general secretion pathway protein D	425	03070 05111 02044	Bacterial secretion system [PATH:ko03070], Biofilm formation - Vibrio cholerae [PATH:ko05111], Secretion system [BR:ko02044],	09131 09145 09183	09130 09140 09180
D|1136176.5.peg.2810	1	3233386	3234165	-	780	1728	1590	1534	1628.5	1645.5	1701.5	443	445.5	494.5	422.5	427	469	1164.45	1112.56	1082.8	1200.53	1087.67	1110.63	670.886	622.46	649.419	647.097	604.418	702.199	887.927	0.795165	0.0494657	16.0751	3.82e-58	7.35e-57	General secretion pathway protein N	NA	K02463	gspN; general secretion pathway protein N	107	05111 02044	Biofilm formation - Vibrio cholerae [PATH:ko05111], Secretion system [BR:ko02044],	09145 09183	09140 09180
D|1136176.5.peg.2819	1	3240477	3241979	-	1503	1681	1648.5	1696.5	1572.5	1786	1744	421.5	468	549	417.5	518	454.5	1132.78	1153.14	1197.15	1159.24	1180.9	1138.7	637.569	654.633	721.723	639.43	733.229	679.74	919.019	0.7739	0.0450656	17.1727	4.25e-66	9.81e-65	General secretion pathway protein E	NA	K02454	gspE; general secretion pathway protein E [EC:7.4.2.8]	351	03070 05111 02044	Bacterial secretion system [PATH:ko03070], Biofilm formation - Vibrio cholerae [PATH:ko05111], Secretion system [BR:ko02044],	09131 09145 09183	09130 09140 09180
D|1136176.5.peg.4146	2	1359778	1361103	+	1326	1734	1615	1677	1702	1837.5	1756	436	506	504	445.5	519	473	1168.49	1130.05	1183.74	1255.1	1214.62	1146.54	660.285	707.786	662.566	682.365	734.644	708.188	937.865	0.772112	0.0464351	16.6278	4.39e-62	9.05e-61	Secretion protein%2C HlyD family	NA	K12542	lapC; membrane fusion protein, adhesin transport system	157	02000 02044	Transporters [BR:ko02000], Secretion system [BR:ko02044],	09183	09180
D|1136176.5.peg.3222	2	323549	324550	+	1002	149	129	127.5	127	126.5	138	34	44	39.5	38	42.5	31.5	100.407	90.264	89.6453	93.6533	83.311	90.1039	51.4901	61.5466	51.27	58.2694	59.451	46.414	72.9854	0.73561	0.121814	6.03879	1.55e-09	4.35e-09	IncF plasmid conjugative transfer pilus assembly protein TraU	NA	K12060	traU; conjugal transfer pilus assembly protein TraU	253	02044	Secretion system [BR:ko02044],	09183	09180
D|1136176.5.peg.3224	2	325246	326991	+	1746	184.5	195	156.5	153.5	182.5	198.5	49	55.5	53.5	53.5	58.5	40	123.992	136.446	110.115	112.826	120.338	129.28	74.2063	76.9333	69.6746	81.2704	82.099	59.889	98.0892	0.724353	0.110321	6.56585	5.17e-11	1.59e-10	IncF plasmid conjugative transfer protein TraN	NA	K12058	traN; conjugal transfer mating pair stabilization protein TraN	107	02044	Secretion system [BR:ko02044],	09183	09180
D|1136176.5.peg.4591	3	93658	95202	-	1545	106.5	117	99.5	106.5	119.5	116	27	44	32.5	24.5	35	30	71.4304	81.8673	69.8809	78.1673	78.6826	75.7395	40.8892	61.5466	42.0677	36.8017	49.5425	44.9168	60.961	0.720209	0.133621	5.38995	7.05e-08	1.76e-07	IncF plasmid conjugative transfer pilus assembly protein TraB	NA	K12065	traB; conjugal transfer pilus assembly protein TraB	67	02044	Secretion system [BR:ko02044],	09183	09180
D|1136176.5.peg.376	1	423032	424141	+	1110	1977	1655	1674.5	2067	1742	1816	590.5	548.5	534.5	601.5	445.5	487.5	1332.24	1158.04	1181.62	1524.26	1151.81	1185.72	893.505	766.535	702.004	921.576	629.897	729.149	1014.7	0.699058	0.104656	6.67958	2.4e-11	7.56e-11	Twitching motility protein PilT	NA	K02670	pilU; twitching motility protein PilU	241	02044 02035	Secretion system [BR:ko02044], Bacterial motility proteins [BR:ko02035],	09183	09180
D|1136176.5.peg.2148	1	2458238	2459098	-	861	150	158.5	144	127	153.5	145	31	40	57	34	45	52.5	101.081	110.556	101.645	93.6533	101.163	94.6744	46.9469	55.9515	74.933	52.1358	63.6975	77.8557	81.1911	0.692572	0.120146	5.76442	8.19e-09	2.2e-08	Flagellar biosynthesis protein FliP	NA	K02419	fliP; flagellar biosynthesis protein FliP	190	02040 02044 02035	Flagellar assembly [PATH:ko02040], Secretion system [BR:ko02044], Bacterial motility proteins [BR:ko02035],	09142 09183	09140 09180
D|1136176.5.peg.4145	2	1357626	1359785	+	2160	1851	1660	1755	1765	1869.5	1861	470	550	615	466.5	580	523	1247.34	1161.54	1238.8	1301.56	1235.78	1215.1	711.775	769.333	808.488	714.566	820.99	783.049	1000.69	0.681688	0.048532	14.0462	8.13e-45	1.08e-43	Type I secretion system ATPase%2C LssB family LapB	NA	K12541	lapB; ATP-binding cassette, subfamily C, bacterial LapB	245	02010 02000 02044	ABC transporters [PATH:ko02010], Transporters [BR:ko02000], Secretion system [BR:ko02044],	09131 09183	09130 09180
D|1136176.5.peg.273	1	316783	318117	+	1335	29882.5	29217.5	25634.5	24445.5	27883	28685	7056.5	8038	9930	6125	9288.5	9163	20136.6	20443.7	18094.2	18026.4	18436.2	18729.2	10685.7	11243.5	13054.1	9392.1	13147.2	13719.1	15425.7	0.676499	0.0903876	7.48442	7.19e-14	2.63e-13	Preprotein translocase secY subunit (TC 3.A.5.1.1)	NA	K03076	secY; preprotein translocase subunit SecY	377	03060 03070 02024 02044	Protein export [PATH:ko03060], Bacterial secretion system [PATH:ko03070], Quorum sensing [PATH:ko02024], Secretion system [BR:ko02044],	09123 09131 09145 09183	09120 09130 09140 09180
D|1136176.5.peg.215	1	268957	269475	+	519	82	85.5	88.5	78	81.5	93.5	24	23	30.5	19	38.5	21	55.2574	59.4763	62.1164	57.5193	53.5571	60.7222	36.346	32.1721	39.4384	29.1347	53.789	31.4417	47.5809	0.642512	0.1491	4.30928	1.64e-05	3.34e-05	Type IV pilus biogenesis protein PilP	NA	K02665	pilP; type IV pilus assembly protein PilP	69	02044 02035	Secretion system [BR:ko02044], Bacterial motility proteins [BR:ko02035],	09183	09180
D|1136176.5.peg.4394	2	1636413	1637138	-	726	378	379.5	351.5	359	372	363.5	112.5	119	128.5	109.5	100.5	105	254.723	265.194	247.76	264.736	245.966	237.013	169.614	166.456	168.271	167.141	141.55	157.209	207.136	0.642491	0.0763938	8.41024	4.09e-17	1.84e-16	P pilus assembly protein%2C chaperone PapD	NA	K07346	fimC; fimbrial chaperone protein	18	03110 02044 02035	Chaperones and folding catalysts [BR:ko03110], Secretion system [BR:ko02044], Bacterial motility proteins [BR:ko02035],	09182 09183	09180
D|1136176.5.peg.4582	3	83195	84601	-	1407	270	295	242.5	248.5	250	256	88	84	94	67	79	68	181.945	206.418	170.82	182.882	165.3	167.149	133.269	117.498	123.574	102.738	111.824	101.811	147.102	0.634878	0.0966175	6.57104	5e-11	1.53e-10	IncF plasmid conjugative transfer pilus assembly protein TraH	NA	K12072	traH; conjugative transfer pilus assembly protein TraH	129	02044	Secretion system [BR:ko02044],	09183	09180
D|1136176.5.peg.3214	2	316530	316835	+	306	30	29	28.5	28	25	34.5	11.5	6	2	20	5.5	9.5	20.2161	20.2919	19.7643	20.648	16.53	22.1995	16.6586	8.39272	2.62923	30.6681	7.0775	13.475	16.5459	0.631181	0.299336	2.10861	0.0349786	0.0480103	hypothetical protein	NA	K12068	traL; conjugal transfer pilus assembly protein TraL	18	02044	Secretion system [BR:ko02044],	09183	09180
D|1136176.5.peg.3218	2	319538	319918	+	381	22	17	19	18	17	20	7.5	6	10	3	1	8	14.8252	11.8953	13.4115	13.2737	11.2404	13.0585	10.6009	8.39272	13.1461	4.60021	1.4155	11.9778	10.6532	0.62365	0.303755	2.05313	0.0400596	0.0545008	IncF plasmid conjugative transfer pilus assembly protein TraV	NA	K12064	traV; conjugal transfer pilus assembly protein TraV	13	02044	Secretion system [BR:ko02044],	09183	09180
D|1136176.5.peg.458	1	512002	513687	-	1686	891.5	813.5	795	802	829.5	884	278	246	278.5	253	285.5	221.5	600.419	568.873	561.165	591.417	548.133	577.187	421.007	344.102	365.463	387.951	403.417	330.887	475.002	0.614537	0.0610046	10.0736	7.23e-24	4.4e-23	Type IV fimbrial assembly%2C ATPase PilB	NA	K02652	pilB; type IV pilus assembly protein PilB	298	02044 02035	Secretion system [BR:ko02044], Bacterial motility proteins [BR:ko02035],	09183	09180
D|1136176.5.peg.2814	1	3236931	3237665	-	735	453.5	398.5	412.5	388.5	420.5	476	131.5	143.5	147	128.5	121	126.5	305.264	278.489	290.818	286.122	277.703	310.793	198.388	200.027	193.248	196.276	171.275	188.65	241.421	0.608714	0.0719772	8.45704	2.74e-17	1.24e-16	General secretion pathway protein J	NA	K02459	gspJ; general secretion pathway protein J	67	03070 05111 02044	Bacterial secretion system [PATH:ko03070], Biofilm formation - Vibrio cholerae [PATH:ko05111], Secretion system [BR:ko02044],	09131 09145 09183	09130 09140 09180
D|1136176.5.peg.2144	1	2453687	2455786	-	2100	495	449	390	445	452.5	419	138	148	141.5	119	161.5	126	333.566	314.175	275.289	328.155	298.862	273.576	208.989	207.021	185.361	182.475	227.895	188.65	252.001	0.602478	0.0842436	7.15162	8.58e-13	2.95e-12	Flagellar biosynthesis protein FlhA	NA	K02400	flhA; flagellar biosynthesis protein FlhA	522	02040 02044 02035	Flagellar assembly [PATH:ko02040], Secretion system [BR:ko02044], Bacterial motility proteins [BR:ko02035],	09142 09183	09140 09180
D|1136176.5.peg.4592	3	95192	95977	-	786	82.5	82	82	68.5	80.5	95	25	17	18	31.5	25	37.5	55.2574	57.3771	57.8812	50.1451	52.8959	62.0281	37.8604	23.7794	23.6631	47.5355	35.3875	55.3973	46.6007	0.601691	0.163115	3.68875	0.000225	0.000411	IncF plasmid conjugative transfer pilus assembly protein TraK	NA	K12066	traK; conjugal transfer pilus assembly protein TraK	27	02044	Secretion system [BR:ko02044],	09183	09180
D|1136176.5.peg.2816	1	3238034	3238627	-	594	458	516	433	421.5	475	533.5	113	169	161	126.5	188.5	139	308.633	361.056	305.641	310.457	314.069	348.01	171.129	236.395	211.653	193.209	266.114	208.114	269.54	0.595985	0.0938491	6.35046	2.15e-10	6.34e-10	General secretion pathway protein H	NA	K02457	gspH; general secretion pathway protein H	28	03070 05111 02044	Bacterial secretion system [PATH:ko03070], Biofilm formation - Vibrio cholerae [PATH:ko05111], Secretion system [BR:ko02044],	09131 09145 09183	09130 09140 09180
D|1136176.5.peg.4147	2	1361138	1362451	+	1314	1775	1614.5	1735	1642	1781	1748	477.5	558.5	639.5	504.5	538.5	563	1196.12	1129.35	1224.68	1210.86	1177.59	1141.32	722.376	780.523	840.039	772.836	761.539	842.938	983.347	0.583766	0.0469855	12.4244	1.93e-35	1.81e-34	Agglutination protein	NA	K12543	lapE; outer membrane protein, adhesin transport system	150	02000 02044	Transporters [BR:ko02000], Secretion system [BR:ko02044],	09183	09180
D|1136176.5.peg.2615	1	2999538	3001175	-	1638	562	487.5	541.5	481.5	537.5	582	167.5	178.5	181.5	141	186.5	166	378.716	340.764	381.875	354.703	355.063	380.004	252.907	248.984	237.945	216.21	263.283	248.539	304.916	0.577624	0.0668154	8.64508	5.38e-18	2.54e-17	MSHA biogenesis protein MshL	NA	K12282	mshL; MSHA biogenesis protein MshL	271	02044	Secretion system [BR:ko02044],	09183	09180
D|1136176.5.peg.2617	1	3001516	3002163	-	648	214.5	212.5	204	204.5	262	230	78.5	70	93	63	73.5	53.5	144.208	148.341	143.997	150.435	173.234	150.173	118.124	97.9151	122.259	96.6045	103.331	79.353	127.331	0.556867	0.101954	5.46194	4.71e-08	1.2e-07	MSHA biogenesis protein MshJ	NA	K12280	mshJ; MSHA biogenesis protein MshJ	54	02044	Secretion system [BR:ko02044],	09183	09180
D|1136176.5.peg.4584	3	85174	85959	-	786	65.5	53	58.5	59	65.5	71	23	25	14	21	21	17	43.8016	37.0852	40.9404	43.5082	42.9779	46.3578	34.8315	34.9697	18.4046	32.2015	29.7255	25.4528	35.8547	0.545915	0.167777	3.25382	0.00113865	0.00191231	IncF plasmid conjugative transfer pilus assembly protein TraF	NA	K12057	traF; conjugal transfer pilus assembly protein TraF	57	02044	Secretion system [BR:ko02044],	09183	09180
D|1136176.5.peg.3217	2	318114	319526	+	1413	65.5	64.5	67.5	76	63.5	60.5	14	23	24	22	22.5	25	43.8016	44.7821	47.2932	56.0445	41.6555	39.1756	21.2018	32.1721	31.5507	33.7349	31.141	37.4306	38.332	0.537457	0.165649	3.24455	0.00117637	0.00197352	IncF plasmid conjugative transfer pilus assembly protein TraB	NA	K12065	traB; conjugal transfer pilus assembly protein TraB	76	02044	Secretion system [BR:ko02044],	09183	09180
D|1136176.5.peg.2309	1	2634057	2634557	-	501	29.5	38	27.5	22.5	33	24.5	8	13	12.5	5.5	5	14.5	19.5423	26.5894	19.0584	16.2234	21.8195	15.6702	12.1153	18.1842	15.7754	7.66702	7.0775	20.9612	16.7237	0.534469	0.25319	2.11094	0.0347778	0.0477628	Type IV fimbrial biogenesis protein FimT	NA	K08084	fimT; type IV fimbrial biogenesis protein FimT	19	02044	Secretion system [BR:ko02044],	09183	09180
D|1136176.5.peg.3223	2	324563	325249	+	687	152.5	139.5	135	133.5	130.5	129	52.5	48	52	45.5	28	46.5	102.428	97.2612	95.2922	98.0778	85.9558	84.2276	78.7496	67.1418	68.3599	69.0032	39.634	68.8724	79.5837	0.525624	0.124334	4.22751	2.36e-05	4.75e-05	IncF plasmid conjugative transfer protein TrbC	NA	K12059	trbC; conjugal transfer pilus assembly protein TrbC	26	02044	Secretion system [BR:ko02044],	09183	09180
D|1136176.5.peg.2147	1	2457957	2458226	-	270	95	92.5	92.5	84.5	89.5	107	29	40.5	37	22.5	30.5	31	64.0178	64.3743	64.9399	61.9439	58.8466	69.8632	43.918	55.9515	48.6407	33.7349	42.465	46.414	54.5925	0.496671	0.13607	3.65011	0.000262	0.000475	Flagellar biosynthesis protein FliQ	NA	K02420	fliQ; flagellar biosynthesis protein FliQ	62	02040 02044 02035	Flagellar assembly [PATH:ko02040], Secretion system [BR:ko02044], Bacterial motility proteins [BR:ko02035],	09142 09183	09140 09180
D|1136176.5.peg.2811	1	3234167	3234655	-	489	492	451	437	430	520	491.5	161.5	165	161	141.5	182.5	151.5	331.545	315.574	308.464	317.094	343.823	320.587	243.821	230.8	211.653	216.21	257.621	226.081	276.939	0.484042	0.0678901	7.12978	1.01e-12	3.44e-12	General secretion pathway protein M	NA	K02462	gspM; general secretion pathway protein M	58	03070 05111 02044	Bacterial secretion system [PATH:ko03070], Biofilm formation - Vibrio cholerae [PATH:ko05111], Secretion system [BR:ko02044],	09131 09145 09183	09130 09140 09180
D|1136176.5.peg.2146	1	2457168	2457950	-	783	368	355	337	330	367	353.5	115	119.5	144	112.5	122.5	108	247.985	248.401	237.878	243.351	242.66	230.483	174.158	166.456	189.304	171.741	172.691	161.7	207.234	0.483424	0.073215	6.6028	4.03e-11	1.25e-10	Flagellar biosynthesis protein FliR	NA	K02421	fliR; flagellar biosynthesis protein FliR	227	02040 02044 02035	Flagellar assembly [PATH:ko02040], Secretion system [BR:ko02044], Bacterial motility proteins [BR:ko02035],	09142 09183	09140 09180
D|1136176.5.peg.2851	1	3279006	3279260	-	255	3603.5	3157.5	3247.5	3292	3649	3472	1096.5	1325	1070.5	1302.5	1159	1016.5	2427.96	2209.02	2291.95	2427.61	2412.71	2266.96	1659.8	1853.39	1406.64	1996.49	1640.56	1521.18	2009.52	0.47837	0.0782801	6.111	9.9e-10	2.8e-09	Twin-arginine translocation protein TatA	NA	K03116	tatA; sec-independent protein translocase protein TatA	43	03060 03070 02044	Protein export [PATH:ko03060], Bacterial secretion system [PATH:ko03070], Secretion system [BR:ko02044],	09123 09131 09183	09120 09130 09180
D|1136176.5.peg.3901	2	1065476	1066150	-	675	433	429	456	441	475	559	142	176	160	166	156	160	291.786	300.18	321.876	325.205	314.069	364.986	215.047	246.187	210.338	254.545	220.818	239.556	275.383	0.470124	0.0790461	5.94747	2.72e-09	7.56e-09	P pilus assembly protein%2C chaperone PapD	NA	K07346	fimC; fimbrial chaperone protein	27	03110 02044 02035	Chaperones and folding catalysts [BR:ko03110], Secretion system [BR:ko02044], Bacterial motility proteins [BR:ko02035],	09182 09183	09180
D|1136176.5.peg.457	1	510758	511987	-	1230	99	84	82	94	95	99.5	36	23.5	31	36	39	27	66.7133	58.7765	57.8812	69.3182	62.8138	64.6398	54.5189	32.1721	40.753	55.2026	55.2045	40.4251	54.8683	0.456285	0.139077	3.2808	0.00103511	0.00175045	Type IV fimbrial assembly protein PilC	NA	K02653	pilC; type IV pilus assembly protein PilC	249	02044 02035	Secretion system [BR:ko02044], Bacterial motility proteins [BR:ko02035],	09183	09180
D|1136176.5.peg.4589	3	90565	93114	-	2550	112	115	109	121	121	130	41	56	40.5	43	28	40.5	75.4736	80.4679	76.9396	89.2287	80.005	84.8805	62.091	78.3321	52.5846	65.9364	39.634	59.889	70.4552	0.444456	0.127365	3.48964	0.000484	0.000851	IncF plasmid conjugative transfer pilus assembly protein TraC	NA	K12063	traC; conjugal transfer ATP-binding protein TraC	257	02044	Secretion system [BR:ko02044],	09183	09180
D|1136176.5.peg.2373	1	2703306	2704253	-	948	1454.5	1438	1267.5	1236.5	1358	1440.5	459.5	447	587	334.5	520	531.5	979.809	1006.2	894.335	911.46	897.907	940.215	695.117	625.258	771.679	512.157	736.06	795.027	813.768	0.444411	0.0926216	4.79814	1.6e-06	3.58e-06	Protein-export membrane protein SecF (TC 3.A.5.1.1)	NA	K03074	secF; preprotein translocase subunit SecF	226	03060 03070 02044	Protein export [PATH:ko03060], Bacterial secretion system [PATH:ko03070], Secretion system [BR:ko02044],	09123 09131 09183	09120 09130 09180
D|1136176.5.peg.2155	1	2464506	2465825	-	1320	454	446	337.5	376	401.5	372.5	168	127	161	122	132.5	130.5	305.938	312.075	237.878	277.273	265.14	242.889	254.422	177.646	211.653	187.075	186.846	194.639	237.789	0.437536	0.103703	4.21914	2.45e-05	4.92e-05	Flagellum-specific ATP synthase FliI	NA	K02412	fliI; flagellum-specific ATP synthase [EC:7.4.2.8]	422	02040 02044 02035	Flagellar assembly [PATH:ko02040], Secretion system [BR:ko02044], Bacterial motility proteins [BR:ko02035],	09142 09183	09140 09180
D|1136176.5.peg.2812	1	3234676	3235920	-	1245	836	731.5	764.5	808.5	790	826.5	281	266	315	252	311.5	257	563.356	511.496	539.283	595.841	522.347	539.318	425.551	372.077	414.104	386.418	440.22	384.787	474.567	0.432211	0.0616274	7.01329	2.33e-12	7.73e-12	General secretion pathway protein L	NA	K02461	gspL; general secretion pathway protein L	125	03070 05111 02044	Bacterial secretion system [PATH:ko03070], Biofilm formation - Vibrio cholerae [PATH:ko05111], Secretion system [BR:ko02044],	09131 09145 09183	09130 09140 09180
D|1136176.5.peg.1323	1	1537624	1538931	-	1308	1319	1128.5	1104.5	1208.5	1256.5	1199	450.5	439	449	436.5	371	407.5	888.836	789.285	779.278	890.812	830.465	782.859	681.487	614.068	590.262	668.564	525.15	609.371	720.87	0.428716	0.0685494	6.25412	4e-10	1.16e-09	Agglutination protein	NA	K12543	lapE; outer membrane protein, adhesin transport system	254	02000 02044	Transporters [BR:ko02000], Secretion system [BR:ko02044],	09183	09180
D|1136176.5.peg.3219	2	319923	322466	+	2544	197.5	200	186.5	178	180	188.5	71.5	68	66.5	63	71	64.5	132.753	139.944	131.291	131.262	119.016	122.75	107.523	95.1175	86.7645	96.6045	100.5	95.8224	113.279	0.41775	0.0971973	4.29796	1.72e-05	3.51e-05	IncF plasmid conjugative transfer pilus assembly protein TraC	NA	K12063	traC; conjugal transfer ATP-binding protein TraC	242	02044	Secretion system [BR:ko02044],	09183	09180
D|1136176.5.peg.4581	3	80384	83191	-	2808	428.5	428.5	425.5	436.5	466.5	444.5	160	150	161	161	142	173	288.417	299.48	299.994	321.518	308.118	289.9	242.306	209.818	211.653	246.878	201.001	259.02	264.842	0.40231	0.0723869	5.55777	2.73e-08	7.06e-08	IncF plasmid conjugative transfer protein TraG	NA	K12056	traG; conjugal transfer mating pair stabilization protein TraG	161	02044	Secretion system [BR:ko02044],	09183	09180
D|1136176.5.peg.2616	1	3001191	3001523	-	333	158.5	140.5	148.5	143.5	166.5	150.5	56.5	60	53.5	48.5	67.5	46	106.472	97.9609	104.468	105.452	109.759	97.9391	84.8072	83.9272	69.6746	73.6034	94.8385	68.8724	91.4812	0.386891	0.107067	3.61354	0.000302	0.000543	MSHA biogenesis protein MshK	NA	K12281	mshK; MSHA biogenesis protein MshK	14	02044	Secretion system [BR:ko02044],	09183	09180
D|1136176.5.peg.3216	2	317392	318117	+	726	37	36.5	34	26.5	29.5	27.5	15	12	10	7	6.5	19.5	24.9332	25.1899	23.9995	19.1731	19.1747	17.629	22.7162	16.7854	13.1461	10.7338	8.493	28.4473	19.2018	0.383608	0.236822	1.61982	0.105272	0.133919	IncF plasmid conjugative transfer pilus assembly protein TraK	NA	K12066	traK; conjugal transfer pilus assembly protein TraK	30	02044	Secretion system [BR:ko02044],	09183	09180
D|1136176.5.peg.2609	1	2993430	2994005	-	576	833	777	829	799	871	838	302	304	327	280	348	300	561.335	543.683	585.165	589.205	575.904	547.153	457.353	425.231	429.879	429.353	492.594	449.168	507.168	0.342326	0.0534156	6.40873	1.47e-10	4.37e-10	MSHA pilin protein MshB	NA	K10925	mshB; MSHA pilin protein MshB	11	05111 02044	Biofilm formation - Vibrio cholerae [PATH:ko05111], Secretion system [BR:ko02044],	09145 09183	09140 09180
D|1136176.5.peg.2375	1	2706145	2706474	-	330	1681	1606.5	1571	1534	1691	1674.5	635.5	648	688.5	546	619	573	1132.78	1123.75	1108.92	1131.21	1118.09	1093	961.654	906.414	904.455	837.239	876.194	857.91	1004.3	0.327412	0.0396587	8.25575	1.51e-16	6.52e-16	Preprotein translocase subunit YajC (TC 3.A.5.1.1)	NA	K03210	yajC; preprotein translocase subunit YajC	77	03060 03070 02024 02044	Protein export [PATH:ko03060], Bacterial secretion system [PATH:ko03070], Quorum sensing [PATH:ko02024], Secretion system [BR:ko02044],	09123 09131 09145 09183	09120 09130 09140 09180
D|1136176.5.peg.2158	1	2467804	2469486	-	1683	946	910	885.5	885.5	889.5	887.5	346	341	393.5	327.5	352.5	304	637.482	636.746	624.693	652.623	587.805	579.146	523.988	476.987	516.643	501.423	498.256	455.157	557.579	0.322029	0.0550379	5.85104	4.89e-09	1.33e-08	Flagellar M-ring protein FliF	NA	K02409	fliF; flagellar M-ring protein FliF	319	02040 02044 02035	Flagellar assembly [PATH:ko02040], Secretion system [BR:ko02044], Bacterial motility proteins [BR:ko02035],	09142 09183	09140 09180
D|1136176.5.peg.214	1	268341	268970	+	630	76	75.5	75.5	80	87.5	90.5	35	30	31.5	28	31.5	31	51.2142	52.479	52.9401	58.9942	57.5242	58.7634	53.0045	41.9636	40.753	42.9353	43.8805	46.414	50.0722	0.307459	0.138236	2.22415	0.0261381	0.0365681	Type IV pilus biogenesis protein PilO	NA	K02664	pilO; type IV pilus assembly protein PilO	56	02044 02035	Secretion system [BR:ko02044], Bacterial motility proteins [BR:ko02035],	09183	09180
D|1136176.5.peg.2613	1	2997494	2998642	-	1149	119	129.5	109.5	124	137	121	39.5	49.5	54	41	58	45.5	80.1907	90.264	76.9396	91.441	90.5842	79.0042	59.0622	68.5406	70.9892	62.8696	82.099	67.3752	76.6133	0.302457	0.116659	2.59266	0.00952357	0.014183	MSHA biogenesis protein MshN	NA	K12284	mshN; MSHA biogenesis protein MshN	11	02044	Secretion system [BR:ko02044],	09183	09180
D|1136176.5.peg.213	1	267734	268348	+	615	37	35	34	40	36	41.5	17.5	13	10	21	17	9	24.9332	24.4902	23.9995	29.4971	23.8031	26.77	25.7451	18.1842	13.1461	32.2015	24.0635	13.475	23.3591	0.287533	0.20463	1.40514	0.15998	0.196286	Type IV pilus biogenesis protein PilN	NA	K02663	pilN; type IV pilus assembly protein PilN	39	02044 02035	Secretion system [BR:ko02044], Bacterial motility proteins [BR:ko02035],	09183	09180
D|1136176.5.peg.569	1	649088	650302	+	1215	20786.5	20223.5	21581.5	20276	22451.5	21330.5	9564	8104	6944.5	10800	7617	6253.5	14007.1	14150.5	15233.3	14952.1	14844.6	13926.9	14483.9	11335.8	9128.68	16560.8	10781.9	9362.15	13230.6	0.281937	0.134454	2.09691	0.0360016	0.0493123	Type II/IV secretion system ATPase TadZ/CpaE%2C associated with Flp pilus assembly	NA	K02282	cpaE, tadZ; pilus assembly protein CpaE	62	02044 02035	Secretion system [BR:ko02044], Bacterial motility proteins [BR:ko02035],	09183	09180
D|1136176.5.peg.4392	2	1633248	1635632	-	2385	502	440.5	458	475.5	524	478	180.5	192	224	172	192	180	338.283	307.877	323.288	350.278	346.468	312.099	272.595	268.567	294.474	263.746	271.776	269.501	301.579	0.268119	0.0653632	4.10198	4.1e-05	8.04e-05	P pilus assembly protein%2C porin PapC	NA	K07347	fimD, fimC, mrkC, htrE, cssD; outer membrane usher protein	82	05133 02000 02044 02035	Pertussis [PATH:ko05133], Transporters [BR:ko02000], Secretion system [BR:ko02044], Bacterial motility proteins [BR:ko02035],	09171 09183	09160 09180
D|1136176.5.peg.2487	1	2848881	2851607	-	2727	2361	2364	2239	2138	2399	2511	818	1010	1151	790	1160	950	1591.01	1654.14	1580.44	1576.62	1586.21	1639.5	1238.79	1412.78	1513.12	1211.39	1641.98	1422.36	1505.7	0.189111	0.0694715	2.72215	0.00648595	0.00988761	Protein export cytoplasm protein SecA ATPase RNA helicase (TC 3.A.5.1.1)	NA	K03070	secA; preprotein translocase subunit SecA [EC:7.4.2.8]	706	03060 03070 02024 02044	Protein export [PATH:ko03060], Bacterial secretion system [PATH:ko03070], Quorum sensing [PATH:ko02024], Secretion system [BR:ko02044],	09123 09131 09145 09183	09120 09130 09140 09180
D|1136176.5.peg.2821	1	3244045	3244968	-	924	898	824	911	891	947	958	342	372	448	377	380	360	605.136	576.57	643.046	657.048	626.155	625.504	517.93	520.349	588.947	578.093	537.89	539.001	584.639	0.184928	0.053897	3.43114	0.000601	0.00104457	General secretion pathway protein C	NA	K02452	gspC; general secretion pathway protein C	81	03070 05111 02044	Bacterial secretion system [PATH:ko03070], Biofilm formation - Vibrio cholerae [PATH:ko05111], Secretion system [BR:ko02044],	09131 09145 09183	09130 09140 09180
D|1136176.5.peg.3900	2	1062994	1065432	-	2439	214.5	199	196	191	255	222	88	93.5	100	81	102	74.5	144.208	139.244	138.35	140.849	168.606	144.95	133.269	130.087	131.461	124.206	144.381	110.795	137.534	0.178067	0.0921978	1.93136	0.0534385	0.0712003	hypothetical protein	NA	K07347	fimD, fimC, mrkC, htrE, cssD; outer membrane usher protein	103	05133 02000 02044 02035	Pertussis [PATH:ko05133], Transporters [BR:ko02000], Secretion system [BR:ko02044], Bacterial motility proteins [BR:ko02035],	09171 09183	09160 09180
D|1136176.5.peg.2374	1	2704268	2706124	-	1857	2469.5	2475.5	2220.5	2092.5	2467	2483	953	1085	1154.5	854.5	1079	964.5	1663.79	1731.81	1567.03	1542.7	1631.18	1621.22	1443.24	1517.68	1517.06	1309.53	1527.32	1443.33	1542.99	0.155174	0.0474584	3.26969	0.00107664	0.00181606	Protein-export membrane protein SecD (TC 3.A.5.1.1)	NA	K03072	secD; preprotein translocase subunit SecD	446	03060 03070 02044	Protein export [PATH:ko03060], Bacterial secretion system [PATH:ko03070], Secretion system [BR:ko02044],	09123 09131 09183	09120 09130 09180
D|1136176.5.peg.2603	1	2986772	2990524	-	3753	3973	3607.5	3781.5	3678	4004	4029.5	1484	1649.5	1786	1665.5	1676.5	1642.5	2677.29	2523.89	2668.89	2712.26	2647.44	2630.64	2247.39	2306.6	2347.9	2553.12	2372.38	2458.44	2512.19	0.151163	0.0365358	4.13739	3.51e-05	6.94e-05	MSHA biogenesis protein MshQ	NA	K12287	mshQ; MSHA biogenesis protein MshQ	74	02044	Secretion system [BR:ko02044],	09183	09180
D|1136176.5.peg.2606	1	2991678	2992283	-	606	247	281.5	268	216.5	274.5	274.5	93.5	129.5	135	106	109.5	99.5	166.446	196.621	189.173	159.284	181.168	178.902	140.841	180.444	177.473	162.541	154.289	148.225	169.617	0.150017	0.0879789	1.70515	0.0881667	0.113591	MSHA pilin protein MshD	NA	K10927	mshD; MSHA pilin protein MshD	32	05111 02044	Biofilm formation - Vibrio cholerae [PATH:ko05111], Secretion system [BR:ko02044],	09145 09183	09140 09180
D|1136176.5.peg.122	1	160618	160995	+	378	6177	5803.5	5749	5491	6268.5	6261	2400	2687.5	2859.5	2658	2547.5	2298.5	4162.5	4060.48	4058.04	4049.21	4144.39	4087.98	3634.6	3758.54	3758.48	4075.79	3605.28	3440.62	3902.99	0.141241	0.038539	3.66489	0.000247	0.00045	Preprotein translocase subunit SecE (TC 3.A.5.1.1)	NA	K03073	secE; preprotein translocase subunit SecE	75	03060 03070 02024 02044	Protein export [PATH:ko03060], Bacterial secretion system [PATH:ko03070], Quorum sensing [PATH:ko02024], Secretion system [BR:ko02044],	09123 09131 09145 09183	09120 09130 09140 09180
D|1136176.5.peg.216	1	269511	271226	+	1716	1367	1245	1214	1277	1417	1432	585	617	540	621	570	506	921.182	871.152	856.924	941.695	936.918	934.991	885.933	863.052	709.892	952.244	806.835	757.596	869.868	0.136132	0.0683029	1.99306	0.0462553	0.0623271	Type IV pilus biogenesis protein PilQ	NA	K02666	pilQ; type IV pilus assembly protein PilQ	254	02044 02035	Secretion system [BR:ko02044], Bacterial motility proteins [BR:ko02035],	09183	09180
D|1136176.5.peg.4594	3	96554	96856	-	303	64.5	59.5	60	61.5	61	57	29	28.5	30	29.5	20.5	23	43.1278	41.2835	42.3521	44.9831	40.3331	37.2168	43.918	39.166	39.4384	44.4687	28.31	34.4362	39.9195	0.11876	0.152764	0.77741	0.436917	0.485556	IncF plasmid conjugative transfer pilus assembly protein TraL	NA	K12068	traL; conjugal transfer pilus assembly protein TraL	23	02044	Secretion system [BR:ko02044],	09183	09180
D|1136176.5.peg.2614	1	2998645	2999484	-	840	152	163	151.5	134.5	173	184	73.5	72.5	78.5	50	95.5	53.5	102.428	114.054	106.586	98.8153	114.387	120.139	110.552	100.713	102.54	76.6702	134.472	79.353	105.059	0.11683	0.118202	0.988398	0.322958	0.37044	MSHA biogenesis protein MshM	NA	K12283	mshM; MSHA biogenesis protein MshM	136	02044	Secretion system [BR:ko02044],	09183	09180
D|1136176.5.peg.572	1	652766	653737	+	972	7110.5	7107	7463.5	7093	7846.5	7652	3628.5	3179	2780	4302.5	3199	2404.5	4791.23	4972.91	5267.89	5230.57	5187.76	4996.2	5494.3	4446.75	3654.63	6596.71	4528.18	3599.33	4897.2	0.104595	0.132086	0.791871	0.428436	0.476816	Type II/IV secretion system protein TadC%2C associated with Flp pilus assembly	NA	K12511	tadC; tight adherence protein C	108	02044	Secretion system [BR:ko02044],	09183	09180
D|1136176.5.peg.2534	1	2904981	2906651	-	1671	543.5	505	512.5	502	560.5	595	264.5	231	211	250	263	205	365.912	353.359	361.404	370.189	370.271	388.492	399.806	323.12	277.384	383.351	372.276	306.931	356.041	0.102062	0.0818957	1.24624	0.212675	0.253984	General secretion pathway protein A	NA	K02450	gspA; general secretion pathway protein A	169	02044	Secretion system [BR:ko02044],	09183	09180
D|1136176.5.peg.2150	1	2459612	2460022	-	411	465.5	439.5	398	411.5	475	448	184	195	221	162	228.5	186	313.35	307.177	280.936	303.083	314.069	292.511	278.652	272.764	290.53	248.412	322.734	278.484	291.892	0.0967691	0.0677905	1.42747	0.153443	0.189186	Flagellar motor switch protein FliN	NA	K02417	fliN; flagellar motor switch protein FliN	111	02030 02040 02044 02035	Bacterial chemotaxis [PATH:ko02030], Flagellar assembly [PATH:ko02040], Secretion system [BR:ko02044], Bacterial motility proteins [BR:ko02035],	09142 09183	09140 09180
D|1136176.5.peg.570	1	650336	651787	+	1452	20494	19857.5	20947.5	19840.5	22450	21227	10632	9165	7902	11970	8457.5	7098.5	13810.3	13894.4	14785.8	14630.6	14843.9	13859.7	16101.3	12819.9	10388.1	18354.9	11970.9	10627.3	13840.6	0.0967207	0.129538	0.746661	0.455268	0.504501	Type II/IV secretion system ATP hydrolase TadA/VirB11/CpaF%2C TadA subfamily	NA	K02283	cpaF, tadA; pilus assembly protein CpaF [EC:7.4.2.8]	224	02044 02035	Secretion system [BR:ko02044], Bacterial motility proteins [BR:ko02035],	09183	09180
D|1136176.5.peg.571	1	651797	652762	+	966	14427.5	14129	15621.5	14265	16372.5	15562	7803	6988.5	5779	8810	6330	4790.5	9721.94	9886.35	11026.4	10519.4	10825.1	10160.9	11817	9774.73	7597.16	13509.3	8960.11	7171.71	10080.8	0.0790286	0.138365	0.571161	0.56789	0.615922	Flp pilus assembly protein TadB	NA	K12510	tadB; tight adherence protein B	107	02044	Secretion system [BR:ko02044],	09183	09180
D|1136176.5.peg.551	1	635121	635801	-	681	3118.5	3054	3094	2988	3240	3373	1078	1508.5	1556	1450.5	1572.5	1490	2101.13	2136.95	2183.96	2203.43	2142.28	2202.32	1632.54	2109.37	2045.54	2223.44	2225.17	2230.87	2119.75	0.056977	0.0700689	0.813156	0.416129	0.464567	P pilus assembly protein%2C chaperone PapD	NA	K07346	fimC; fimbrial chaperone protein	33	03110 02044 02035	Chaperones and folding catalysts [BR:ko03110], Secretion system [BR:ko02044], Bacterial motility proteins [BR:ko02035],	09182 09183	09180
D|1136176.5.peg.2813	1	3235889	3236938	-	1050	831	792	761	707.5	867	800.5	354.5	373.5	442	322.5	326	374.5	559.987	554.179	537.166	521.361	573.259	522.342	536.103	521.748	581.06	493.756	461.453	559.962	535.198	0.0507233	0.0598289	0.847806	0.396546	0.444952	General secretion pathway protein K	NA	K02460	gspK; general secretion pathway protein K	166	03070 05111 02044	Bacterial secretion system [PATH:ko03070], Biofilm formation - Vibrio cholerae [PATH:ko05111], Secretion system [BR:ko02044],	09131 09145 09183	09130 09140 09180
D|1136176.5.peg.3804	2	954272	955663	-	1392	5306	4886	5288	5142	5638	5567	2145	2621	2639	2266	2670	2396	3575.56	3418.84	3732.63	3791.85	3727.84	3634.84	3248.42	3666.22	3469.27	3474.69	3779.38	3587.35	3592.24	0.0437041	0.0429974	1.01644	0.309422	0.356235	Type I secretion system%2C membrane fusion protein LapC	NA	K12542	lapC; membrane fusion protein, adhesin transport system	272	02000 02044	Transporters [BR:ko02000], Secretion system [BR:ko02044],	09183	09180
D|1136176.5.peg.2145	1	2456028	2457158	-	1131	329	336	325.5	305.5	313	368.5	150	161	207	119	133	148.5	221.704	235.106	229.407	224.915	206.955	240.277	227.162	225.205	272.125	182.475	188.261	221.589	222.932	0.0413162	0.0891618	0.463385	0.643088	0.687838	Flagellar biosynthesis protein FlhB	NA	K02401	flhB; flagellar biosynthesis protein FlhB	244	02040 02044 02035	Flagellar assembly [PATH:ko02040], Secretion system [BR:ko02044], Bacterial motility proteins [BR:ko02035],	09142 09183	09140 09180
D|1136176.5.peg.372	1	419684	420241	-	558	591	666	654	564	659	662	234	324	372	282	304	265	398.258	466.014	461.638	415.909	435.73	432.238	354.373	453.207	489.037	432.42	430.312	396.765	430.492	0.0275984	0.0752864	0.366579	0.713933	0.753792	Integral membrane protein YggT%2C involved in response to extracytoplasmic stress (osmotic shock)	NA	K02221	yggT; YggT family protein	166	02044	Secretion system [BR:ko02044],	09183	09180
D|1136176.5.peg.550	1	632720	635110	-	2391	5067.5	4996	5053	4713.5	5340	5307	2099	2563.5	2523	2280.5	2510	2334.5	3414.51	3495.8	3566.75	3475.5	3530.8	3465.08	3178.76	3585.09	3316.77	3496.16	3552.9	3494.52	3464.39	0.0224392	0.0339991	0.659992	0.509259	0.557937	P pilus assembly protein%2C porin PapC	NA	K07347	fimD, fimC, mrkC, htrE, cssD; outer membrane usher protein	109	05133 02000 02044 02035	Pertussis [PATH:ko05133], Transporters [BR:ko02000], Secretion system [BR:ko02044], Bacterial motility proteins [BR:ko02035],	09171 09183	09160 09180
D|1136176.5.peg.2608	1	2992918	2993394	-	477	1126	1015	1074	1017	1148	1167	455	531	566	490	541	496	758.779	710.216	758.102	749.964	759.056	761.966	689.059	742.756	744.072	751.368	765.785	742.624	744.479	0.0198602	0.0431556	0.460199	0.645374	0.689524	MshA%2C mannose-sensitive haemaglutinin	NA	K10924	mshA; MSHA pilin protein MshA	28	05111 02044	Biofilm formation - Vibrio cholerae [PATH:ko05111], Secretion system [BR:ko02044],	09145 09183	09140 09180
D|1136176.5.peg.564	1	645144	646598	+	1455	34627.5	34060.5	37339.5	34052.5	39816	36618	18039	16573.5	15172.5	21199.5	16529	14517.5	23334.1	23832.5	26356.4	25110.9	26326.3	23908.9	27318.5	23182.1	19945.3	32506.6	23396.8	21735.2	24746.1	0.00765657	0.105477	0.0725901	0.942132	0.953221	Type II/IV secretion system secretin RcpA/CpaC%2C associated with Flp pilus assembly	NA	K02280	cpaC, rcpA; pilus assembly protein CpaC	204	02044 02035	Secretion system [BR:ko02044], Bacterial motility proteins [BR:ko02035],	09183	09180
D|1136176.5.peg.3221	2	322815	323537	+	723	140.5	148	146.5	134	163	186	61.5	74	91.5	68	78.5	65.5	94.342	103.559	103.057	98.8153	107.775	121.444	92.3793	103.51	119.63	104.272	110.409	97.3197	104.709	0.00101223	0.102723	0.00985403	0.992138	0.992993	IncF plasmid conjugative transfer pilus assembly protein TraW	NA	K12061	traW; conjugal transfer pilus assembly protein TraW	69	02044	Secretion system [BR:ko02044],	09183	09180
D|1136176.5.peg.3062	2	138758	140149	+	1392	2247.5	2138.5	2237	2281.5	2353.5	2541	721.5	1212	1403.5	857.5	1275	1184	1514.19	1496	1579.03	1682.07	1555.8	1659.09	1091.89	1695.33	1844.4	1314.13	1804.76	1772.72	1584.12	-0.00608159	0.117661	-0.0516872	0.958778	0.967322	Type I secretion system%2C outer membrane component LapE	NA	K12340	tolC; outer membrane protein	58	03070 02020 04626 05133 01501 01503 02000 02044 01504	Bacterial secretion system [PATH:ko03070], Two-component system [PATH:ko02020], Plant-pathogen interaction [PATH:ko04626], Pertussis [PATH:ko05133], beta-Lactam resistance [PATH:ko01501], Cationic antimicrobial peptide (CAMP) resistance [PATH:ko01503], Transporters [BR:ko02000], Secretion system [BR:ko02044], Antimicrobial resistance genes [BR:ko01504],	09131 09132 09159 09171 09175 09183	09130 09150 09160 09180
D|1136176.5.peg.4393	2	1635724	1636410	-	687	206	203.5	192.5	193	205	192.5	93.5	100	117.5	91.5	108.5	63	138.817	142.043	135.527	142.323	135.546	125.362	140.841	139.879	153.81	139.54	152.874	94.3252	136.741	-0.00736443	0.0973271	-0.0756668	0.939684	0.950951	D01204084: hypothetical protein	NA	K07346	fimC; fimbrial chaperone protein	13	03110 02044 02035	Chaperones and folding catalysts [BR:ko03110], Secretion system [BR:ko02044], Bacterial motility proteins [BR:ko02035],	09182 09183	09180
D|1136176.5.peg.2605	1	2990911	2991678	-	768	336.5	309	337	300.5	351	357	120	177.5	147	177	168	164	226.421	216.214	237.878	221.228	232.081	233.095	181.73	247.585	193.248	271.413	237.804	245.545	228.687	-0.00884605	0.0872919	-0.101339	0.919282	0.933969	MSHA biogenesis protein MshO	NA	K12285	mshO; MSHA biogenesis protein MshO	76	02044	Secretion system [BR:ko02044],	09183	09180
D|1136176.5.peg.3063	2	140139	141725	+	1587	2080.5	2001	2095.5	2052.5	2186.5	2367	763.5	1033.5	1293	783	1191	1135.5	1401.65	1400.14	1478.79	1513.2	1445.38	1545.48	1155.5	1444.95	1699.8	1200.66	1685.86	1699.35	1472.56	-0.0170678	0.101868	-0.167548	0.866939	0.886221	ABC transporter protein	NA	K12541	lapB; ATP-binding cassette, subfamily C, bacterial LapB	24	02010 02000 02044	ABC transporters [PATH:ko02010], Transporters [BR:ko02000], Secretion system [BR:ko02044],	09131 09183	09130 09180
D|1136176.5.peg.2310	1	2634660	2635091	+	432	87	82	100	91	78	92	38	51	35	43	44	47	58.6268	57.3771	70.5868	67.1059	51.5735	60.0693	57.5478	71.3382	46.0115	65.9364	62.282	70.3696	61.5687	-0.0298373	0.13228	-0.225561	0.821543	0.847467	Type IV pilus biogenesis protein PilE	NA	K02655	pilE; type IV pilus assembly protein PilE	31	02044 02035	Secretion system [BR:ko02044], Bacterial motility proteins [BR:ko02035],	09183	09180
D|1136176.5.peg.3801	2	949495	951609	-	2115	3567.5	3449.5	3512	3375	3686	3840.5	1702.5	1809	2031.5	1480.5	1854.5	1755	2403.7	2413.34	2479.01	2488.82	2437.18	2507.24	2577.53	2530.41	2669.98	2269.44	2624.34	2627.63	2502.38	-0.0553293	0.0403994	-1.36956	0.170825	0.208403	Type I secretion system ATPase%2C LssB family LapB	NA	K12541	lapB; ATP-binding cassette, subfamily C, bacterial LapB	481	02010 02000 02044	ABC transporters [PATH:ko02010], Transporters [BR:ko02000], Secretion system [BR:ko02044],	09131 09183	09130 09180
D|1136176.5.peg.89	1	113280	114533	+	1254	566	500	509	454	540	541	233	274	294	222	276	247	381.411	349.86	359.287	334.792	357.047	353.234	352.859	383.268	386.497	340.416	390.678	369.815	363.264	-0.0596563	0.0592804	-1.00634	0.314252	0.361257	Signal recognition particle receptor protein FtsY (alpha subunit) (TC 3.A.5.1.1)	NA	K03110	ftsY; fused signal recognition particle receptor	212	03060 03070 02024 02044	Protein export [PATH:ko03060], Bacterial secretion system [PATH:ko03070], Quorum sensing [PATH:ko02024], Secretion system [BR:ko02044],	09123 09131 09145 09183	09120 09130 09140 09180
D|1136176.5.peg.518	1	594862	595194	+	333	170	170	148	153	169	171	78	96	76	61	88	100	114.558	118.953	104.468	112.826	111.743	111.651	118.124	134.284	99.9107	93.5377	124.564	149.723	116.195	-0.094046	0.103075	-0.9124	0.361558	0.409854	Preprotein translocase subunit SecG (TC 3.A.5.1.1)	NA	K03075	secG; preprotein translocase subunit SecG	76	03060 03070 02024 02044	Protein export [PATH:ko03060], Bacterial secretion system [PATH:ko03070], Quorum sensing [PATH:ko02024], Secretion system [BR:ko02044],	09123 09131 09145 09183	09120 09130 09140 09180
D|1136176.5.peg.2149	1	2459154	2459612	-	459	148	135.5	146.5	157.5	139	165.5	62	74	97.5	69.5	72	82.5	99.733	94.4623	103.057	115.776	91.9066	107.733	93.8937	103.51	127.518	105.805	101.916	122.772	105.674	-0.101484	0.103594	-0.979631	0.327268	0.375106	Flagellar biosynthesis protein FliQ	NA	K02418	fliO, fliZ; flagellar protein FliO/FliZ	19	02040 02044 02035	Flagellar assembly [PATH:ko02040], Secretion system [BR:ko02044], Bacterial motility proteins [BR:ko02035],	09142 09183	09140 09180
D|1136176.5.peg.375	1	421980	423017	+	1038	1155.5	1071.5	1087	1030.5	1077.5	1128	569	561.5	638.5	543.5	604.5	559.5	778.321	749.401	767.279	759.55	712.11	736.502	861.702	784.72	838.724	832.639	854.962	836.949	792.738	-0.153805	0.0430355	-3.57391	0.000352	0.000626	Twitching motility protein PilT	NA	K02669	pilT; twitching motility protein PilT	267	02044 02035	Secretion system [BR:ko02044], Bacterial motility proteins [BR:ko02035],	09183	09180
D|1136176.5.peg.563	1	644386	645135	+	750	7443	7483	8402	7917	9038.5	8179.5	3848	4442.5	3999.5	5140	4483.5	3793.5	5015.62	5236.01	5930.7	5838.21	5975.91	5340.29	5827.47	6213.41	5257.14	7881.7	6345.68	5678.98	5878.43	-0.158264	0.0923684	-1.7134	0.0866384	0.111746	Flp pilus assembly protein RcpC/CpaB	NA	K02279	cpaB, rcpC; pilus assembly protein CpaB	70	02044 02035	Secretion system [BR:ko02044], Bacterial motility proteins [BR:ko02035],	09183	09180
D|1136176.5.peg.4585	3	85983	87710	-	1728	106.5	96	108.5	85	113.5	98	66	72	40	48	53	43	71.4304	67.1732	76.2338	62.6813	74.7154	63.9868	99.9514	100.713	52.5846	73.6034	75.0215	64.3807	73.5396	-0.15972	0.139303	-1.14657	0.251561	0.295557	IncF plasmid conjugative transfer protein TraN	NA	K12058	traN; conjugal transfer mating pair stabilization protein TraN	61	02044	Secretion system [BR:ko02044],	09183	09180
D|1136176.5.peg.2743	1	3163746	3164213	+	468	402	435	392	370	435	449	157	186	287	211	273	216	270.896	304.378	276.7	272.848	287.621	293.164	237.763	260.174	377.294	323.548	386.431	323.401	301.185	-0.163702	0.107979	-1.51605	0.129506	0.162609	Protein export cytoplasm chaperone protein (SecB%2C maintains protein to be exported in unfolded state)	NA	K03071	secB; preprotein translocase subunit SecB	161	03060 03070 02024 03110 02044	Protein export [PATH:ko03060], Bacterial secretion system [PATH:ko03070], Quorum sensing [PATH:ko02024], Chaperones and folding catalysts [BR:ko03110], Secretion system [BR:ko02044],	09123 09131 09145 09182 09183	09120 09130 09140 09180
D|1136176.5.peg.2083	1	2372915	2373214	-	300	40.5	48.5	49.5	27.5	35	36.5	31.5	17	25.5	20.5	15.5	19	26.9549	33.5866	34.5875	19.9105	23.1419	23.5054	46.9469	23.7794	32.8654	30.6681	21.2325	28.4473	28.8022	-0.182064	0.203382	-0.895184	0.370689	0.419079	Competence protein ComEA	NA	K02237	comEA; competence protein ComEA	28	02044	Secretion system [BR:ko02044],	09183	09180
D|1136176.5.peg.212	1	266725	267750	+	1026	65	78	70	73	82	79.5	34.5	51	43	51	36	28	43.8016	54.5782	49.4108	53.8322	54.2183	51.5812	51.4901	71.3382	56.5284	78.2036	50.958	41.9223	54.8219	-0.189009	0.140564	-1.34465	0.178737	0.217426	Type IV pilus biogenesis protein PilM	NA	K02662	pilM; type IV pilus assembly protein PilM	58	02044 02035	Secretion system [BR:ko02044], Bacterial motility proteins [BR:ko02035],	09183	09180
D|1136176.5.peg.448	1	504284	505678	+	1395	7737	7167	7384	7187	7972	7680	4411	4174	3946	4375	3845	3743	5213.74	5014.9	5212.13	5299.89	5271.07	5014.48	6680.09	5838.54	5187.47	6708.64	5442.6	5604.12	5540.64	-0.192543	0.0670601	-2.8712	0.00408911	0.00636967	Signal recognition particle%2C subunit Ffh SRP54 (TC 3.A.5.1.1)	NA	K03106	SRP54, ffh; signal recognition particle subunit SRP54 [EC:3.6.5.4]	331	03060 03070 02024 02044	Protein export [PATH:ko03060], Bacterial secretion system [PATH:ko03070], Quorum sensing [PATH:ko02024], Secretion system [BR:ko02044],	09123 09131 09145 09183	09120 09130 09140 09180
D|1136176.5.peg.3060	2	135166	136515	+	1350	5994	5728.5	6143	5917	6333	6661	2469	3394.5	4028.5	2907.5	3829	3545	4039.18	4008	4336.15	4363.36	4187.37	4349.15	3739.09	4747.48	5295.27	4457.61	5419.95	5307.66	4520.86	-0.196397	0.0848929	-2.31347	0.0206968	0.0294437	HlyD family secretion protein	NA	K12542	lapC; membrane fusion protein, adhesin transport system	63	02000 02044	Transporters [BR:ko02000], Secretion system [BR:ko02044],	09183	09180
D|1136176.5.peg.3064	2	141722	143860	+	2139	4545	4366	4532	4284	4726	5149	1829	2643.5	3302	1800	3071.5	2658.5	3062.75	3054.98	3198.99	3159.14	3124.82	3361.92	2769.87	3697	4340.86	2760.13	4347	3979.63	3404.76	-0.207618	0.11676	-1.77816	0.0753781	0.0980676	D01200333: hypothetical protein	NA	K12541	lapB; ATP-binding cassette, subfamily C, bacterial LapB	123	02010 02000 02044	ABC transporters [PATH:ko02010], Transporters [BR:ko02000], Secretion system [BR:ko02044],	09131 09183	09130 09180
D|1136176.5.peg.3215	2	316835	317395	+	561	17.5	17	14	19.5	16	18.5	9.5	11	12	8	11.5	6	11.4558	11.8953	9.88215	14.0111	10.5792	11.7527	13.6297	15.3867	15.7754	12.2672	15.5705	8.98335	12.5991	-0.241395	0.259403	-0.930578	0.352072	0.400176	IncF plasmid conjugative transfer pilus assembly protein TraE	NA	K12067	traE; conjugal transfer pilus assembly protein TraE	36	02044	Secretion system [BR:ko02044],	09183	09180
D|1136176.5.peg.2850	1	3278595	3279002	-	408	6600.5	6121.5	6128.5	5520	6761	6690	4010.5	3835	3698.5	3790.5	3534	3114.5	4447.55	4282.99	4325.56	4070.6	4470.36	4368.08	6072.8	5364.35	4861.44	5811.6	5002.38	4662.36	4811.67	-0.291101	0.0666344	-4.36864	1.25e-05	2.58e-05	Twin-arginine translocation protein TatB	NA	K03117	tatB; sec-independent protein translocase protein TatB	43	03060 03070 02044	Protein export [PATH:ko03060], Bacterial secretion system [PATH:ko03070], Secretion system [BR:ko02044],	09123 09131 09183	09120 09130 09180
D|1136176.5.peg.2524	1	2891023	2892348	+	1326	6864	6594	6728	6401	7310	7108	3797	3968	4789	4656	4307	4291	4625.45	4613.96	4749.08	4720.27	4833.36	4641.01	5750.23	5550.39	6295.69	7139.53	6096.56	6424.6	5453.34	-0.402569	0.0569287	-7.07146	1.53e-12	5.17e-12	Type I secretion outer membrane protein%2C TolC precursor	NA	K12340	tolC; outer membrane protein	276	03070 02020 04626 05133 01501 01503 02000 02044 01504	Bacterial secretion system [PATH:ko03070], Two-component system [PATH:ko02020], Plant-pathogen interaction [PATH:ko04626], Pertussis [PATH:ko05133], beta-Lactam resistance [PATH:ko01501], Cationic antimicrobial peptide (CAMP) resistance [PATH:ko01503], Transporters [BR:ko02000], Secretion system [BR:ko02044], Antimicrobial resistance genes [BR:ko01504],	09131 09132 09159 09171 09175 09183	09130 09150 09160 09180
D|1136176.5.peg.4167	2	1379658	1380101	-	444	153	149	133	147	157	158	116	80	114	88	84	96	103.102	104.258	93.8805	108.402	103.808	103.162	175.672	111.903	149.866	134.94	118.902	143.734	120.969	-0.435564	0.102354	-4.25546	2.09e-05	4.22e-05	dCMP deaminase (EC 3.5.4.12)	KEGG_ENZYME:3.5.4.12	K01493	comEB; dCMP deaminase [EC:3.5.4.12]	104	00240 02044	Pyrimidine metabolism [PATH:ko00240], Secretion system [BR:ko02044],	09104 09183	09100 09180
D|1136176.5.peg.2849	1	3277688	3278446	-	759	1257	1175	1130	1073	1268	1316	875	830	943	879	717	729	847.056	822.172	797.631	791.26	838.399	859.252	1325.11	1160.99	1239.68	1347.86	1014.91	1091.48	1011.32	-0.534255	0.0697585	-7.65863	1.88e-14	7.18e-14	Twin-arginine translocation protein TatC	NA	K03118	tatC; sec-independent protein translocase protein TatC	239	03060 03070 02044	Protein export [PATH:ko03060], Bacterial secretion system [PATH:ko03070], Secretion system [BR:ko02044],	09123 09131 09183	09120 09130 09180
D|1136176.5.peg.456	1	509822	510691	-	870	139.5	159	160.5	141	152	157	105	119.5	111	96	96.5	128.5	93.6681	111.256	112.939	103.977	100.502	102.51	159.014	166.456	145.922	147.207	135.888	191.645	130.915	-0.597659	0.0956439	-6.2488	4.14e-10	1.2e-09	Leader peptidase (Prepilin peptidase) (EC 3.4.23.43) / N-methyltransferase (EC 2.1.1.-)	KEGG_ENZYME:3.4.23.43,KEGG_ENZYME:2.1.1.-	K02654	pilD, pppA; leader peptidase (prepilin peptidase) / N-methyltransferase [EC:3.4.23.43 2.1.1.-]	165	01002 02044 02035	Peptidases and inhibitors [BR:ko01002], Secretion system [BR:ko02044], Bacterial motility proteins [BR:ko02035],	09181 09183	09180
D|1136176.5.peg.4207	2	1424463	1424942	-	480	214	232	204	202	232	240	186	169	200	171	172	160	144.208	162.335	143.997	148.96	153.398	156.702	281.681	236.395	262.923	262.212	243.466	239.556	202.986	-0.745539	0.0741975	-10.048	9.37e-24	5.67e-23	hypothetical MSHA pilin protein MshA	NA	K10924	mshA; MSHA pilin protein MshA	37	05111 02044	Biofilm formation - Vibrio cholerae [PATH:ko05111], Secretion system [BR:ko02044],	09145 09183	09140 09180
D|1136176.5.peg.1814	1	2099560	2100867	+	1308	22891	21771	22313.5	20339.5	23506	23424.5	21174	22898	23675	20596	21218.5	21701.5	15425.6	15233.6	15750	14998.5	15542.1	15294.2	32066.2	32029.4	31123.5	31582	30034.1	32491.3	23464.2	-1.03728	0.0247255	-41.9521	0	0	Agglutination protein	NA	K12543	lapE; outer membrane protein, adhesin transport system	255	02000 02044	Transporters [BR:ko02000], Secretion system [BR:ko02044],	09183	09180
