# Supplementary material for: Polysaccharide breakdown products drive degradation-dispersal cycles of foraging bacteria through changes in metabolism and motility
Source: eLife. 2024 Oct 21;13:RP93855. doi: 10.7554/eLife.93855 (PMC11493405; doi:10.7554/eLife.93855)
Supplement: Supplementary file 7. [file elife-93855-supp7.xlsx]

## Sheet: Sheet 1
Geneid	Chr	Start	End	Strand	Length	L1_raw	L2_raw	L3_raw	L4_raw	L5_raw	L6_raw	P1_raw	P2_raw	P3_raw	P4_raw	P5_raw	P6_raw	L1_DESeq	L2_DESeq	L3_DESeq	L4_DESeq	L5_DESeq	L6_DESeq	P1_DESeq	P2_DESeq	P3_DESeq	P4_DESeq	P5_DESeq	P6_DESeq	baseMean	log2FoldChange	lfcSE	stat	pvalue	padj	RASTtk_Annotation	RASTtk_Ontology_term	BlastKOALA_KO	BlastKOALA_KO_Definition	BlastKOALA_KO_Score	KEGG_pathway	KEGG_pathway_descr	KEGG_CategB	KEGG_CategA
D|1136176.5.peg.2817	1	3238724	3239167	-	444	676	656	608	680	677	674	87	68	106	101	113	89	455.537	459.017	429.168	501.451	447.631	440.073	131.754	95.1175	139.349	154.874	159.951	133.253	295.598	1.74791	0.0910211	19.2033	3.47e-82	1.13e-80	General secretion pathway protein G	NA	K02456	gspG; general secretion pathway protein G	111	03070 05111 02044	Bacterial secretion system [PATH:ko03070], Biofilm formation - Vibrio cholerae [PATH:ko05111], Secretion system [BR:ko02044],	09131 09145 09183	09130 09140 09180
D|1136176.5.peg.3728	2	871655	873448	-	1794	482.5	408	400.5	454	427	409	109.5	92	118	106.5	83	93.5	324.806	285.486	282.347	334.792	282.332	267.047	165.071	128.688	155.124	162.541	117.486	139.242	220.414	1.03438	0.0974699	10.6123	2.61e-26	1.75e-25	Protein-export membrane protein SecD (TC 3.A.5.1.1)	NA	K03072	secD; preprotein translocase subunit SecD	323	03060 03070 02044	Protein export [PATH:ko03060], Bacterial secretion system [PATH:ko03070], Secretion system [BR:ko02044],	09123 09131 09183	09120 09130 09180
D|1136176.5.peg.2950	1	3393774	3395393	-	1620	1457	1367	1249	1321	1354	1441	342	352	374	359	330	327	981.831	956.518	881.629	974.142	895.262	940.868	517.93	492.373	491.666	550.492	467.115	489.593	719.952	0.905085	0.0535499	16.9017	4.37e-64	9.85e-63	Inner membrane protein translocase component YidC%2C long form	NA	K03217	yidC, spoIIIJ, OXA1, ccfA; YidC/Oxa1 family membrane protein insertase	363	03060 03070 02024 03029 02044	Protein export [PATH:ko03060], Bacterial secretion system [PATH:ko03070], Quorum sensing [PATH:ko02024], Mitochondrial biogenesis [BR:ko03029], Secretion system [BR:ko02044],	09123 09131 09145 09182 09183	09120 09130 09140 09180
D|1136176.5.peg.3727	2	870714	871652	-	939	257.5	191	209.5	217	229	210	52.5	71	61	58.5	54	53.5	173.185	133.647	147.526	160.022	151.414	137.115	78.7496	99.3139	80.1915	88.9375	76.437	79.353	117.158	0.843534	0.108848	7.74967	9.21e-15	3.59e-14	Protein-export membrane protein SecF (TC 3.A.5.1.1)	NA	K03074	secF; preprotein translocase subunit SecF	127	03060 03070 02044	Protein export [PATH:ko03060], Bacterial secretion system [PATH:ko03070], Secretion system [BR:ko02044],	09123 09131 09183	09120 09130 09180
D|1136176.5.peg.2818	1	3239255	3240475	-	1221	614	634	570	570	631.5	679.5	133.5	167.5	185.5	135.5	198	173	413.757	443.623	402.345	420.334	417.216	443.337	201.417	233.597	243.204	207.01	280.269	259.02	330.427	0.832423	0.0739712	11.2533	2.23e-29	1.66e-28	General secretion pathway protein F	NA	K02455	gspF; general secretion pathway protein F	261	03070 05111 02044	Bacterial secretion system [PATH:ko03070], Biofilm formation - Vibrio cholerae [PATH:ko05111], Secretion system [BR:ko02044],	09131 09145 09183	09130 09140 09180
D|1136176.5.peg.2815	1	3237652	3238047	-	396	158.5	156	136	139.5	164	130.5	33.5	30.5	30.5	35.5	63.5	46.5	106.472	109.156	95.9981	102.502	108.437	84.8805	49.9757	41.9636	39.4384	53.6692	89.1765	68.8724	79.2118	0.827099	0.157689	5.24514	1.56e-07	3.82e-07	General secretion pathway protein I	NA	K02458	gspI; general secretion pathway protein I	30	03070 05111 02044	Bacterial secretion system [PATH:ko03070], Biofilm formation - Vibrio cholerae [PATH:ko05111], Secretion system [BR:ko02044],	09131 09145 09183	09130 09140 09180
D|1136176.5.peg.2820	1	3241979	3244003	-	2025	2991	2742.5	2738.5	2615.5	2994.5	2908.5	727	793.5	901.5	672	856	698.5	2015.55	1918.63	1932.67	1928.37	1979.63	1898.71	1100.98	1109.24	1184.47	1030.45	1211.67	1045.06	1529.62	0.803558	0.0441277	18.2098	4.31e-74	1.21e-72	General secretion pathway protein D	NA	K02453	gspD; general secretion pathway protein D	425	03070 05111 02044	Bacterial secretion system [PATH:ko03070], Biofilm formation - Vibrio cholerae [PATH:ko05111], Secretion system [BR:ko02044],	09131 09145 09183	09130 09140 09180
D|1136176.5.peg.2819	1	3240477	3241979	-	1503	1681	1648.5	1696.5	1572.5	1786	1744	421.5	468	549	417.5	518	454.5	1132.78	1153.14	1197.15	1159.24	1180.9	1138.7	637.569	654.633	721.723	639.43	733.229	679.74	919.019	0.7739	0.0450656	17.1727	4.25e-66	9.81e-65	General secretion pathway protein E	NA	K02454	gspE; general secretion pathway protein E [EC:7.4.2.8]	351	03070 05111 02044	Bacterial secretion system [PATH:ko03070], Biofilm formation - Vibrio cholerae [PATH:ko05111], Secretion system [BR:ko02044],	09131 09145 09183	09130 09140 09180
D|1136176.5.peg.273	1	316783	318117	+	1335	29882.5	29217.5	25634.5	24445.5	27883	28685	7056.5	8038	9930	6125	9288.5	9163	20136.6	20443.7	18094.2	18026.4	18436.2	18729.2	10685.7	11243.5	13054.1	9392.1	13147.2	13719.1	15425.7	0.676499	0.0903876	7.48442	7.19e-14	2.63e-13	Preprotein translocase secY subunit (TC 3.A.5.1.1)	NA	K03076	secY; preprotein translocase subunit SecY	377	03060 03070 02024 02044	Protein export [PATH:ko03060], Bacterial secretion system [PATH:ko03070], Quorum sensing [PATH:ko02024], Secretion system [BR:ko02044],	09123 09131 09145 09183	09120 09130 09140 09180
D|1136176.5.peg.2814	1	3236931	3237665	-	735	453.5	398.5	412.5	388.5	420.5	476	131.5	143.5	147	128.5	121	126.5	305.264	278.489	290.818	286.122	277.703	310.793	198.388	200.027	193.248	196.276	171.275	188.65	241.421	0.608714	0.0719772	8.45704	2.74e-17	1.24e-16	General secretion pathway protein J	NA	K02459	gspJ; general secretion pathway protein J	67	03070 05111 02044	Bacterial secretion system [PATH:ko03070], Biofilm formation - Vibrio cholerae [PATH:ko05111], Secretion system [BR:ko02044],	09131 09145 09183	09130 09140 09180
D|1136176.5.peg.2816	1	3238034	3238627	-	594	458	516	433	421.5	475	533.5	113	169	161	126.5	188.5	139	308.633	361.056	305.641	310.457	314.069	348.01	171.129	236.395	211.653	193.209	266.114	208.114	269.54	0.595985	0.0938491	6.35046	2.15e-10	6.34e-10	General secretion pathway protein H	NA	K02457	gspH; general secretion pathway protein H	28	03070 05111 02044	Bacterial secretion system [PATH:ko03070], Biofilm formation - Vibrio cholerae [PATH:ko05111], Secretion system [BR:ko02044],	09131 09145 09183	09130 09140 09180
D|1136176.5.peg.2811	1	3234167	3234655	-	489	492	451	437	430	520	491.5	161.5	165	161	141.5	182.5	151.5	331.545	315.574	308.464	317.094	343.823	320.587	243.821	230.8	211.653	216.21	257.621	226.081	276.939	0.484042	0.0678901	7.12978	1.01e-12	3.44e-12	General secretion pathway protein M	NA	K02462	gspM; general secretion pathway protein M	58	03070 05111 02044	Bacterial secretion system [PATH:ko03070], Biofilm formation - Vibrio cholerae [PATH:ko05111], Secretion system [BR:ko02044],	09131 09145 09183	09130 09140 09180
D|1136176.5.peg.2851	1	3279006	3279260	-	255	3603.5	3157.5	3247.5	3292	3649	3472	1096.5	1325	1070.5	1302.5	1159	1016.5	2427.96	2209.02	2291.95	2427.61	2412.71	2266.96	1659.8	1853.39	1406.64	1996.49	1640.56	1521.18	2009.52	0.47837	0.0782801	6.111	9.9e-10	2.8e-09	Twin-arginine translocation protein TatA	NA	K03116	tatA; sec-independent protein translocase protein TatA	43	03060 03070 02044	Protein export [PATH:ko03060], Bacterial secretion system [PATH:ko03070], Secretion system [BR:ko02044],	09123 09131 09183	09120 09130 09180
D|1136176.5.peg.2373	1	2703306	2704253	-	948	1454.5	1438	1267.5	1236.5	1358	1440.5	459.5	447	587	334.5	520	531.5	979.809	1006.2	894.335	911.46	897.907	940.215	695.117	625.258	771.679	512.157	736.06	795.027	813.768	0.444411	0.0926216	4.79814	1.6e-06	3.58e-06	Protein-export membrane protein SecF (TC 3.A.5.1.1)	NA	K03074	secF; preprotein translocase subunit SecF	226	03060 03070 02044	Protein export [PATH:ko03060], Bacterial secretion system [PATH:ko03070], Secretion system [BR:ko02044],	09123 09131 09183	09120 09130 09180
D|1136176.5.peg.2812	1	3234676	3235920	-	1245	836	731.5	764.5	808.5	790	826.5	281	266	315	252	311.5	257	563.356	511.496	539.283	595.841	522.347	539.318	425.551	372.077	414.104	386.418	440.22	384.787	474.567	0.432211	0.0616274	7.01329	2.33e-12	7.73e-12	General secretion pathway protein L	NA	K02461	gspL; general secretion pathway protein L	125	03070 05111 02044	Bacterial secretion system [PATH:ko03070], Biofilm formation - Vibrio cholerae [PATH:ko05111], Secretion system [BR:ko02044],	09131 09145 09183	09130 09140 09180
D|1136176.5.peg.2375	1	2706145	2706474	-	330	1681	1606.5	1571	1534	1691	1674.5	635.5	648	688.5	546	619	573	1132.78	1123.75	1108.92	1131.21	1118.09	1093	961.654	906.414	904.455	837.239	876.194	857.91	1004.3	0.327412	0.0396587	8.25575	1.51e-16	6.52e-16	Preprotein translocase subunit YajC (TC 3.A.5.1.1)	NA	K03210	yajC; preprotein translocase subunit YajC	77	03060 03070 02024 02044	Protein export [PATH:ko03060], Bacterial secretion system [PATH:ko03070], Quorum sensing [PATH:ko02024], Secretion system [BR:ko02044],	09123 09131 09145 09183	09120 09130 09140 09180
D|1136176.5.peg.2487	1	2848881	2851607	-	2727	2361	2364	2239	2138	2399	2511	818	1010	1151	790	1160	950	1591.01	1654.14	1580.44	1576.62	1586.21	1639.5	1238.79	1412.78	1513.12	1211.39	1641.98	1422.36	1505.7	0.189111	0.0694715	2.72215	0.00648595	0.00988761	Protein export cytoplasm protein SecA ATPase RNA helicase (TC 3.A.5.1.1)	NA	K03070	secA; preprotein translocase subunit SecA [EC:7.4.2.8]	706	03060 03070 02024 02044	Protein export [PATH:ko03060], Bacterial secretion system [PATH:ko03070], Quorum sensing [PATH:ko02024], Secretion system [BR:ko02044],	09123 09131 09145 09183	09120 09130 09140 09180
D|1136176.5.peg.2821	1	3244045	3244968	-	924	898	824	911	891	947	958	342	372	448	377	380	360	605.136	576.57	643.046	657.048	626.155	625.504	517.93	520.349	588.947	578.093	537.89	539.001	584.639	0.184928	0.053897	3.43114	0.000601	0.00104457	General secretion pathway protein C	NA	K02452	gspC; general secretion pathway protein C	81	03070 05111 02044	Bacterial secretion system [PATH:ko03070], Biofilm formation - Vibrio cholerae [PATH:ko05111], Secretion system [BR:ko02044],	09131 09145 09183	09130 09140 09180
D|1136176.5.peg.2374	1	2704268	2706124	-	1857	2469.5	2475.5	2220.5	2092.5	2467	2483	953	1085	1154.5	854.5	1079	964.5	1663.79	1731.81	1567.03	1542.7	1631.18	1621.22	1443.24	1517.68	1517.06	1309.53	1527.32	1443.33	1542.99	0.155174	0.0474584	3.26969	0.00107664	0.00181606	Protein-export membrane protein SecD (TC 3.A.5.1.1)	NA	K03072	secD; preprotein translocase subunit SecD	446	03060 03070 02044	Protein export [PATH:ko03060], Bacterial secretion system [PATH:ko03070], Secretion system [BR:ko02044],	09123 09131 09183	09120 09130 09180
D|1136176.5.peg.122	1	160618	160995	+	378	6177	5803.5	5749	5491	6268.5	6261	2400	2687.5	2859.5	2658	2547.5	2298.5	4162.5	4060.48	4058.04	4049.21	4144.39	4087.98	3634.6	3758.54	3758.48	4075.79	3605.28	3440.62	3902.99	0.141241	0.038539	3.66489	0.000247	0.00045	Preprotein translocase subunit SecE (TC 3.A.5.1.1)	NA	K03073	secE; preprotein translocase subunit SecE	75	03060 03070 02024 02044	Protein export [PATH:ko03060], Bacterial secretion system [PATH:ko03070], Quorum sensing [PATH:ko02024], Secretion system [BR:ko02044],	09123 09131 09145 09183	09120 09130 09140 09180
D|1136176.5.peg.2813	1	3235889	3236938	-	1050	831	792	761	707.5	867	800.5	354.5	373.5	442	322.5	326	374.5	559.987	554.179	537.166	521.361	573.259	522.342	536.103	521.748	581.06	493.756	461.453	559.962	535.198	0.0507233	0.0598289	0.847806	0.396546	0.444952	General secretion pathway protein K	NA	K02460	gspK; general secretion pathway protein K	166	03070 05111 02044	Bacterial secretion system [PATH:ko03070], Biofilm formation - Vibrio cholerae [PATH:ko05111], Secretion system [BR:ko02044],	09131 09145 09183	09130 09140 09180
D|1136176.5.peg.3062	2	138758	140149	+	1392	2247.5	2138.5	2237	2281.5	2353.5	2541	721.5	1212	1403.5	857.5	1275	1184	1514.19	1496	1579.03	1682.07	1555.8	1659.09	1091.89	1695.33	1844.4	1314.13	1804.76	1772.72	1584.12	-0.00608159	0.117661	-0.0516872	0.958778	0.967322	Type I secretion system%2C outer membrane component LapE	NA	K12340	tolC; outer membrane protein	58	03070 02020 04626 05133 01501 01503 02000 02044 01504	Bacterial secretion system [PATH:ko03070], Two-component system [PATH:ko02020], Plant-pathogen interaction [PATH:ko04626], Pertussis [PATH:ko05133], beta-Lactam resistance [PATH:ko01501], Cationic antimicrobial peptide (CAMP) resistance [PATH:ko01503], Transporters [BR:ko02000], Secretion system [BR:ko02044], Antimicrobial resistance genes [BR:ko01504],	09131 09132 09159 09171 09175 09183	09130 09150 09160 09180
D|1136176.5.peg.89	1	113280	114533	+	1254	566	500	509	454	540	541	233	274	294	222	276	247	381.411	349.86	359.287	334.792	357.047	353.234	352.859	383.268	386.497	340.416	390.678	369.815	363.264	-0.0596563	0.0592804	-1.00634	0.314252	0.361257	Signal recognition particle receptor protein FtsY (alpha subunit) (TC 3.A.5.1.1)	NA	K03110	ftsY; fused signal recognition particle receptor	212	03060 03070 02024 02044	Protein export [PATH:ko03060], Bacterial secretion system [PATH:ko03070], Quorum sensing [PATH:ko02024], Secretion system [BR:ko02044],	09123 09131 09145 09183	09120 09130 09140 09180
D|1136176.5.peg.518	1	594862	595194	+	333	170	170	148	153	169	171	78	96	76	61	88	100	114.558	118.953	104.468	112.826	111.743	111.651	118.124	134.284	99.9107	93.5377	124.564	149.723	116.195	-0.094046	0.103075	-0.9124	0.361558	0.409854	Preprotein translocase subunit SecG (TC 3.A.5.1.1)	NA	K03075	secG; preprotein translocase subunit SecG	76	03060 03070 02024 02044	Protein export [PATH:ko03060], Bacterial secretion system [PATH:ko03070], Quorum sensing [PATH:ko02024], Secretion system [BR:ko02044],	09123 09131 09145 09183	09120 09130 09140 09180
D|1136176.5.peg.2743	1	3163746	3164213	+	468	402	435	392	370	435	449	157	186	287	211	273	216	270.896	304.378	276.7	272.848	287.621	293.164	237.763	260.174	377.294	323.548	386.431	323.401	301.185	-0.163702	0.107979	-1.51605	0.129506	0.162609	Protein export cytoplasm chaperone protein (SecB%2C maintains protein to be exported in unfolded state)	NA	K03071	secB; preprotein translocase subunit SecB	161	03060 03070 02024 03110 02044	Protein export [PATH:ko03060], Bacterial secretion system [PATH:ko03070], Quorum sensing [PATH:ko02024], Chaperones and folding catalysts [BR:ko03110], Secretion system [BR:ko02044],	09123 09131 09145 09182 09183	09120 09130 09140 09180
D|1136176.5.peg.448	1	504284	505678	+	1395	7737	7167	7384	7187	7972	7680	4411	4174	3946	4375	3845	3743	5213.74	5014.9	5212.13	5299.89	5271.07	5014.48	6680.09	5838.54	5187.47	6708.64	5442.6	5604.12	5540.64	-0.192543	0.0670601	-2.8712	0.00408911	0.00636967	Signal recognition particle%2C subunit Ffh SRP54 (TC 3.A.5.1.1)	NA	K03106	SRP54, ffh; signal recognition particle subunit SRP54 [EC:3.6.5.4]	331	03060 03070 02024 02044	Protein export [PATH:ko03060], Bacterial secretion system [PATH:ko03070], Quorum sensing [PATH:ko02024], Secretion system [BR:ko02044],	09123 09131 09145 09183	09120 09130 09140 09180
D|1136176.5.peg.2850	1	3278595	3279002	-	408	6600.5	6121.5	6128.5	5520	6761	6690	4010.5	3835	3698.5	3790.5	3534	3114.5	4447.55	4282.99	4325.56	4070.6	4470.36	4368.08	6072.8	5364.35	4861.44	5811.6	5002.38	4662.36	4811.67	-0.291101	0.0666344	-4.36864	1.25e-05	2.58e-05	Twin-arginine translocation protein TatB	NA	K03117	tatB; sec-independent protein translocase protein TatB	43	03060 03070 02044	Protein export [PATH:ko03060], Bacterial secretion system [PATH:ko03070], Secretion system [BR:ko02044],	09123 09131 09183	09120 09130 09180
D|1136176.5.peg.2524	1	2891023	2892348	+	1326	6864	6594	6728	6401	7310	7108	3797	3968	4789	4656	4307	4291	4625.45	4613.96	4749.08	4720.27	4833.36	4641.01	5750.23	5550.39	6295.69	7139.53	6096.56	6424.6	5453.34	-0.402569	0.0569287	-7.07146	1.53e-12	5.17e-12	Type I secretion outer membrane protein%2C TolC precursor	NA	K12340	tolC; outer membrane protein	276	03070 02020 04626 05133 01501 01503 02000 02044 01504	Bacterial secretion system [PATH:ko03070], Two-component system [PATH:ko02020], Plant-pathogen interaction [PATH:ko04626], Pertussis [PATH:ko05133], beta-Lactam resistance [PATH:ko01501], Cationic antimicrobial peptide (CAMP) resistance [PATH:ko01503], Transporters [BR:ko02000], Secretion system [BR:ko02044], Antimicrobial resistance genes [BR:ko01504],	09131 09132 09159 09171 09175 09183	09130 09150 09160 09180
D|1136176.5.peg.2849	1	3277688	3278446	-	759	1257	1175	1130	1073	1268	1316	875	830	943	879	717	729	847.056	822.172	797.631	791.26	838.399	859.252	1325.11	1160.99	1239.68	1347.86	1014.91	1091.48	1011.32	-0.534255	0.0697585	-7.65863	1.88e-14	7.18e-14	Twin-arginine translocation protein TatC	NA	K03118	tatC; sec-independent protein translocase protein TatC	239	03060 03070 02044	Protein export [PATH:ko03060], Bacterial secretion system [PATH:ko03070], Secretion system [BR:ko02044],	09123 09131 09183	09120 09130 09180
