# Supplementary material for: Polysaccharide breakdown products drive degradation-dispersal cycles of foraging bacteria through changes in metabolism and motility
Source: eLife. 2024 Oct 21;13:RP93855. doi: 10.7554/eLife.93855 (PMC11493405; doi:10.7554/eLife.93855)
Supplement: Supplementary file 8. [file elife-93855-supp8.xlsx]

## Sheet: Sheet1
Geneid	Chr	Start	End	Strand	Length	L1_raw	L2_raw	L3_raw	L4_raw	L5_raw	L6_raw	P1_raw	P2_raw	P3_raw	P4_raw	P5_raw	P6_raw	L1_DESeq	L2_DESeq	L3_DESeq	L4_DESeq	L5_DESeq	L6_DESeq	P1_DESeq	P2_DESeq	P3_DESeq	P4_DESeq	P5_DESeq	P6_DESeq	baseMean	log2FoldChange	lfcSE	stat	pvalue	padj	RASTtk_Annotation	RASTtk_Ontology_term	BlastKOALA_KO	BlastKOALA_KO_Definition	BlastKOALA_KO_Score	KEGG_pathway	KEGG_pathway_descr	KEGG_CategB	KEGG_CategA
D|1136176.5.peg.1	1	1	1422	+	1422	684	688	644	580	667	721	636	572	610	479	587	514	460.928	481.408	454.579	427.708	441.019	470.76	963.168	800.106	801.915	734.501	830.898	769.574	636.38	-0.840143	0.0654598	-12.8345	1.05e-37	1.08e-36	Chromosomal replication initiator protein DnaA	NA	K02313	dnaA; chromosomal replication initiator protein	396	02020 04112 03032 03036	Two-component system [PATH:ko02020], Cell cycle - Caulobacter [PATH:ko04112], DNA replication proteins [BR:ko03032], Chromosome and associated proteins [BR:ko03036],	09132 09143 09182	09130 09140 09180
D|1136176.5.peg.2	1	1504	2604	+	1101	1375	1375	1342	1239	1412	1405	620	541	621	605	601	601	926.573	962.116	947.275	913.673	933.612	917.362	938.937	756.744	816.375	927.71	850.715	899.833	899.244	0.11148	0.0528746	2.10838	0.0349981	0.0480221	DNA polymerase III beta subunit (EC 2.7.7.7)	KEGG_ENZYME:2.7.7.7	K02338	dnaN; DNA polymerase III subunit beta [EC:2.7.7.7]	297	03030 03430 03440 03032 03400	DNA replication [PATH:ko03030], Mismatch repair [PATH:ko03430], Homologous recombination [PATH:ko03440], DNA replication proteins [BR:ko03032], DNA repair and recombination proteins [BR:ko03400],	09124 09182	09120 09180
D|1136176.5.peg.3	1	2658	3737	+	1080	1028.5	987	931.5	977	929	1015	282.5	290	302	245	277.5	263.5	692.74	690.624	657.163	720.467	614.253	662.721	427.065	405.648	397.014	375.684	392.093	393.77	535.77	0.755227	0.0583644	12.9399	2.68e-38	2.84e-37	DNA recombination and repair protein RecF	NA	K03629	recF; DNA replication and repair protein RecF	240	03440 03400	Homologous recombination [PATH:ko03440], DNA repair and recombination proteins [BR:ko03400],	09124 09182	09120 09180
D|1136176.5.peg.4	1	3755	6172	+	2418	5091.5	4854	4666.5	4599	4957	5039	1863.5	1986	2098	1680	1899.5	1827.5	3430.68	3396.44	3293.58	3391.43	3277.56	3290.1	2821.36	2777.99	2758.06	2576.12	2688.03	2735.43	3036.4	0.295487	0.0296587	9.96293	2.21e-23	1.32e-22	DNA gyrase subunit B (EC 5.99.1.3)	KEGG_ENZYME:5.99.1.3	K02470	gyrB; DNA gyrase subunit B [EC:5.6.2.2]	645	03032 03400	DNA replication proteins [BR:ko03032], DNA repair and recombination proteins [BR:ko03400],	09182	09180
D|1136176.5.peg.5	1	6444	6566	-	123	193	165	166	164	176	175	37	39	46	55	45	35	130.057	115.454	117.174	120.938	116.371	114.262	56.0334	54.5527	60.4723	84.3372	63.6975	52.4029	90.4794	0.946315	0.115359	8.20321	2.34e-16	1e-15	hypothetical protein	NA			NA
D|1136176.5.peg.6	1	6709	7143	+	435	843	815	821	743	845	934	334	406	500	406	533	370	568.074	570.272	579.518	547.909	558.713	609.834	505.815	567.908	657.307	622.562	754.461	553.973	591.362	-0.093514	0.0843125	-1.10914	0.267372	0.311844	16 kDa heat shock protein B	NA	K04080	ibpA; molecular chaperone IbpA	87	03110	Chaperones and folding catalysts [BR:ko03110],	09182	09180
D|1136176.5.peg.7	1	7251	8501	-	1251	528	502	488	492	517	511	254	266	334	253	276	283	355.804	351.26	344.464	362.814	341.839	333.646	384.661	372.077	439.081	387.951	390.678	423.715	373.999	-0.200384	0.0582471	-3.44024	0.000581	0.00101159	Valine--pyruvate aminotransferase (EC 2.6.1.66)	KEGG_ENZYME:2.6.1.66	K00835	avtA; valine--pyruvate aminotransferase [EC:2.6.1.66]	339	00290 01007	Valine, leucine and isoleucine biosynthesis [PATH:ko00290], Amino acid related enzymes [BR:ko01007],	09105 09181	09100 09180
D|1136176.5.peg.8	1	8758	10845	-	2088	474	408	424	397	441	451	141	122	157	134	130	129	319.415	285.486	299.288	292.759	291.588	294.47	213.533	170.652	206.394	205.476	184.015	193.142	246.352	0.605274	0.0718078	8.42908	3.48e-17	1.57e-16	Periplasmic alpha-amylase (EC 3.2.1.1)	KEGG_ENZYME:3.2.1.1	K01176	AMY, amyA, malS; alpha-amylase [EC:3.2.1.1]	345	00500 04970 04972 04973	Starch and sucrose metabolism [PATH:ko00500], Salivary secretion [PATH:ko04970], Pancreatic secretion [PATH:ko04972], Carbohydrate digestion and absorption [PATH:ko04973],	09101 09154	09100 09150
D|1136176.5.peg.9	1	11048	13114	-	2067	993	964.5	1010.5	873.5	1077	1017	640.5	747.5	794.5	527.5	699	650	669.154	674.531	712.927	643.774	712.11	664.027	969.226	1044.89	1043.8	808.104	989.434	973.197	825.432	-0.5169	0.0624917	-8.27151	1.32e-16	5.75e-16	Glycyl-tRNA synthetase beta chain (EC 6.1.1.14)	KEGG_ENZYME:6.1.1.14	K01879	glyS; glycyl-tRNA synthetase beta chain [EC:6.1.1.14]	512	00970 01007 03016	Aminoacyl-tRNA biosynthesis [PATH:ko00970], Amino acid related enzymes [BR:ko01007], Transfer RNA biogenesis [BR:ko03016],	09122 09181 09182	09120 09180
D|1136176.5.peg.10	1	13117	14046	-	930	290	304.5	302.5	275.5	304	298	340.5	344.5	335.5	285.5	306	315	195.423	212.715	213.172	202.793	201.004	194.572	514.901	481.183	440.396	437.02	433.143	471.626	333.162	-1.18746	0.0642435	-18.4838	2.79e-76	8.09e-75	Glycyl-tRNA synthetase alpha chain (EC 6.1.1.14)	KEGG_ENZYME:6.1.1.14	K01878	glyQ; glycyl-tRNA synthetase alpha chain [EC:6.1.1.14]	373	00970 01007 03016	Aminoacyl-tRNA biosynthesis [PATH:ko00970], Amino acid related enzymes [BR:ko01007], Transfer RNA biogenesis [BR:ko03016],	09122 09181 09182	09120 09180
D|1136176.5.peg.11	1	14467	15021	+	555	9	8	11	6	9	11	2	8	6	4	2	2	6.06484	5.59777	7.76455	4.42456	5.95078	7.1822	3.02883	11.1903	7.88769	6.13362	2.831	2.99445	5.92088	0.103016	0.3874	0.265916	0.790304	0.820531	Probable transmembrane protein	NA	K23541	TMEM165, GDT1; Ca2+/H+ antiporter, TMEM165/GDT1 family	93	04131 02000	Membrane trafficking [BR:ko04131], Transporters [BR:ko02000],	09182 09183	09180
D|1136176.5.peg.12	1	15179	15427	+	249	618	615	583	559	618	628	569	512	498	380	516	477	416.452	430.328	411.521	412.222	408.621	410.038	861.702	716.179	654.678	582.694	730.398	714.177	562.417	-0.774853	0.0779814	-9.93638	2.89e-23	1.71e-22	NADH dehydrogenase subunit II-related protein	NA			16
D|1136176.5.peg.13	1	15511	15762	-	252	54	65	61	61	43	73	41	57	37	43	53	48	36.3891	45.4818	43.058	44.9831	28.4315	47.6637	62.091	79.7309	48.6407	65.9364	75.0215	71.8668	54.1079	-0.712908	0.152674	-4.66949	3.02e-06	6.58e-06	tRNA 5-methylaminomethyl-2-thiouridine synthase TusA	NA	K04085	tusA, sirA; tRNA 2-thiouridine synthesizing protein A [EC:2.8.1.-]	54	04122 03016	Sulfur relay system [PATH:ko04122], Transfer RNA biogenesis [BR:ko03016],	09123 09182	09120 09180
D|1136176.5.peg.14	1	15912	16097	+	186	244	239	247	276	262	251	225	233	217	190	184	208	164.425	167.233	174.349	203.53	173.234	163.885	340.743	325.917	285.271	291.347	260.452	311.423	238.484	-0.79469	0.0827838	-9.59958	8.03e-22	4.56e-21	D01199885: hypothetical protein	NA			10
D|1136176.5.peg.15	1	16253	17194	+	942	456	406	408	398	448	414	217	256	257	238	223	209	307.285	284.087	287.994	293.496	296.217	270.312	328.628	358.09	337.856	364.95	315.656	312.92	313.124	-0.214595	0.0632012	-3.39543	0.000685	0.00118377	Transcriptional regulator	NA			150
D|1136176.5.peg.16	1	17330	18310	-	981	3016	2933	3088	2718	3169	3193	1484	1445	1637	1787	1512	1594	2032.4	2052.28	2179.72	2004.33	2095.34	2084.8	2247.39	2021.25	2152.02	2740.19	2140.24	2386.58	2178.04	-0.136324	0.0679353	-2.00667	0.0447847	0.0605036	Alcohol dehydrogenase (EC 1.1.1.1)	KEGG_ENZYME:1.1.1.1	K19745	acuI; acrylyl-CoA reductase (NADPH) [EC:1.3.1.-]	238	00640	Propanoate metabolism [PATH:ko00640],	09101	09100
D|1136176.5.peg.17	1	18553	19716	-	1164	12449.5	13275	12287	9914.5	13900.5	12738	18544.5	18340.5	19355.5	9520	16058.5	15734.5	8389.02	9288.79	8673	7310.86	9190.66	8316.98	28083.3	25653.8	25444.4	14598	22730.1	23557.3	15936.3	-1.45277	0.13064	-11.1204	9.98e-29	7.34e-28	3-ketoacyl-CoA thiolase (EC 2.3.1.16) @ Acetyl-CoA acetyltransferase (EC 2.3.1.9)	KEGG_ENZYME:2.3.1.16,KEGG_ENZYME:2.3.1.9	K00632	fadA, fadI; acetyl-CoA acyltransferase [EC:2.3.1.16]	321	00071 00592 00280 00281 00362 00642	Fatty acid degradation [PATH:ko00071], alpha-Linolenic acid metabolism [PATH:ko00592], Valine, leucine and isoleucine degradation [PATH:ko00280], Geraniol degradation [PATH:ko00281], Benzoate degradation [PATH:ko00362], Ethylbenzene degradation [PATH:ko00642],	09103 09105 09109 09111	09100
D|1136176.5.peg.18	1	19743	21914	-	2172	29516.5	31721	29478	24754.5	33689.5	30788	37928.5	41700.5	39062.5	21161	33378.5	33070.5	19890	22195.8	20807.6	18254.3	22275.1	20102.3	57438.7	58329.4	51351.5	32448.4	47246.5	49513.3	34987.7	-1.26239	0.121704	-10.3726	3.3e-25	2.13e-24	Enoyl-CoA hydratase (EC 4.2.1.17) / Delta(3)-cis-delta(2)-trans-enoyl-CoA isomerase (EC 5.3.3.8) / 3-hydroxyacyl-CoA dehydrogenase (EC 1.1.1.35) / 3-hydroxybutyryl-CoA epimerase (EC 5.1.2.3)	KEGG_ENZYME:4.2.1.17,KEGG_ENZYME:5.3.3.8,KEGG_ENZYME:1.1.1.35,KEGG_ENZYME:5.1.2.3	K01825	fadB; 3-hydroxyacyl-CoA dehydrogenase / enoyl-CoA hydratase / 3-hydroxybutyryl-CoA epimerase / enoyl-CoA isomerase [EC:1.1.1.35 4.2.1.17 5.1.2.3 5.3.3.8]	485	00640 00650 00071 00280 00310 00380 00410 00903 00281 00362 00930	Propanoate metabolism [PATH:ko00640], Butanoate metabolism [PATH:ko00650], Fatty acid degradation [PATH:ko00071], Valine, leucine and isoleucine degradation [PATH:ko00280], Lysine degradation [PATH:ko00310], Tryptophan metabolism [PATH:ko00380], beta-Alanine metabolism [PATH:ko00410], Limonene and pinene degradation [PATH:ko00903], Geraniol degradation [PATH:ko00281], Benzoate degradation [PATH:k…	09101 09103 09105 09106 09109 09111	09100
D|1136176.5.peg.19	1	22142	22765	+	624	590	622	569	507	679	616	765	743	728	545	586	640	397.584	435.226	401.639	373.876	448.954	402.203	1158.53	1039.3	957.039	835.705	829.483	958.224	686.48	-1.23191	0.0863723	-14.2628	3.73e-46	5.08e-45	D000605: protein co-occurring with transport systems (COG1739)	NA			111
D|1136176.5.peg.20	1	22800	24257	+	1458	272.5	289	262.5	249	286	299	195.5	219.5	208	115	175	165	183.293	202.219	184.937	183.619	189.103	195.225	295.311	306.334	273.44	176.342	247.712	247.042	223.715	-0.4435	0.10541	-4.20737	2.58e-05	5.17e-05	Potassium uptake protein TrkH	NA	K03498	trkH, trkG, ktrB; trk system potassium uptake protein	362	02000	Transporters [BR:ko02000],	09183	09180
D|1136176.5.peg.21	1	24268	24795	+	528	197.5	171	193.5	192	186	216	81.5	93.5	90	60	73	80	132.753	119.652	136.233	141.586	122.983	141.032	122.668	130.087	118.315	92.0043	103.331	119.778	123.369	0.208429	0.0973032	2.14205	0.0321892	0.044418	Protoporphyrinogen IX oxidase%2C oxygen-independent%2C HemG (EC 1.3.-.-)	KEGG_ENZYME:1.3.-.-	K00230	hemG; menaquinone-dependent protoporphyrinogen oxidase [EC:1.3.5.3]	108	00860	Porphyrin and chlorophyll metabolism [PATH:ko00860],	09108	09100
D|1136176.5.peg.22	1	31412	32794	+	1383	231	196	200	203	217	220	147	168	123	117	160	121	155.664	137.145	141.174	149.698	143.48	143.644	222.619	234.996	161.698	179.408	226.48	181.164	173.098	-0.469577	0.0949493	-4.94555	7.59e-07	1.76e-06	Multicopper oxidase	NA			227
D|1136176.5.peg.23	1	32895	33278	+	384	1417	1400	1335	1193	1370	1428	684	611	748	643	679	651	954.876	979.609	942.334	879.751	905.842	932.38	1035.86	854.659	983.332	985.979	961.124	974.694	949.203	-0.0501194	0.0500222	-1.00194	0.316371	0.363424	CrcB protein	NA	K06199	crcB, FEX; fluoride exporter	65	02000	Transporters [BR:ko02000],	09183	09180
D|1136176.5.peg.24	1	33570	35519	+	1950	507.5	474	494.5	470.5	519	512.5	270	255	281.5	220.5	265.5	255	341.653	331.668	348.699	346.591	343.162	334.299	408.892	356.691	369.407	337.349	375.107	381.793	356.276	-0.123635	0.0576581	-2.14427	0.0320113	0.0441988	Hydroxymethylpyrimidine phosphate synthase ThiC (EC 4.1.99.17)	KEGG_ENZYME:4.1.99.17	K03147	thiC; phosphomethylpyrimidine synthase [EC:4.1.99.17]	527	00730	Thiamine metabolism [PATH:ko00730],	09108	09100
D|1136176.5.peg.25	1	35519	36811	+	1293	106.5	120	103.5	78.5	103	103.5	48.5	38	67.5	68.5	60.5	48	71.4304	83.9665	72.7044	57.5193	68.1034	67.2515	72.6919	53.1539	88.0792	104.272	84.93	71.8668	74.6641	-0.17225	0.139135	-1.23801	0.215714	0.257216	Thiamin-phosphate pyrophosphorylase (EC 2.5.1.3)	KEGG_ENZYME:2.5.1.3			NA
D|1136176.5.peg.26	1	36801	37583	+	783	44	58	70	51	38.5	37	31.5	35	45.5	18	32	24	29.6503	40.5838	49.4108	37.6088	25.1255	24.1583	46.9469	48.9576	59.1576	27.6013	45.296	35.9334	39.2025	-0.364684	0.210399	-1.7333	0.0830427	0.107299	Sulfur carrier protein adenylyltransferase ThiF	NA			NA
D|1136176.5.peg.27	1	37580	37789	+	210	18	7.5	10	18.5	16	11.5	10	11	13.5	4	7	8	12.1297	4.89804	7.05868	13.2737	10.5792	7.1822	15.1442	15.3867	17.09	6.13362	9.9085	11.9778	10.8968	-0.469996	0.299627	-1.56861	0.11674	0.147417	Sulfur carrier protein ThiS	NA	K03154	thiS; sulfur carrier protein	28	04122	Sulfur relay system [PATH:ko04122],	09123	09120
D|1136176.5.peg.28	1	37792	38556	+	765	51	44	49	42.5	50.5	58	10	24	26	18	25	22	34.3674	30.7877	34.5875	30.972	33.0599	37.8698	15.1442	33.5709	34.18	27.6013	35.3875	32.939	31.7056	0.166172	0.173458	0.957992	0.338067	0.386082	Thiazole biosynthesis protein ThiG	NA	K03149	thiG; thiazole synthase [EC:2.8.1.10]	192	00730	Thiamine metabolism [PATH:ko00730],	09108	09100
D|1136176.5.peg.29	1	38564	39691	+	1128	69	57.5	62	56	61	61.5	21	24	13	22	23	13	46.4971	39.8841	43.7638	41.2959	40.3331	39.8285	31.8027	33.5709	17.09	33.7349	32.5565	19.4639	34.9851	0.588011	0.171496	3.42872	0.000606	0.00105356	2-iminoacetate synthase (ThiH) (EC 4.1.99.19)	KEGG_ENZYME:4.1.99.19	K03150	thiH; 2-iminoacetate synthase [EC:4.1.99.19]	367	00730	Thiamine metabolism [PATH:ko00730],	09108	09100
D|1136176.5.peg.30	1	39827	41617	-	1791	1916	1809	1877	1755	1877	1792	1536	1373	1407	1346	1224	1283	1291.14	1265.79	1324.91	1294.19	1241.07	1170.05	2326.14	1920.54	1849.66	2063.96	1732.57	1920.94	1616.75	-0.638475	0.0678237	-9.41374	4.79e-21	2.63e-20	Xaa-Pro aminopeptidase (EC 3.4.11.9)	KEGG_ENZYME:3.4.11.9	K01262	pepP; Xaa-Pro aminopeptidase [EC:3.4.11.9]	360	01002	Peptidases and inhibitors [BR:ko01002],	09181	09180
D|1136176.5.peg.31	1	41741	42682	-	942	873	775	892	875	964	891	1058	1050	815	1028	691	731	588.29	542.283	629.634	645.249	637.395	581.758	1602.25	1468.73	1071.41	1576.34	978.11	1094.47	951.327	-1.10369	0.126906	-8.69686	3.41e-18	1.63e-17	LysR-family transcriptional regulator VC0068	NA			155
D|1136176.5.peg.32	1	42784	43983	+	1200	170	178	212	180	200	212	103	93	94	68	91	95	114.558	124.55	149.644	132.737	132.24	138.421	155.985	130.087	123.574	104.272	128.81	142.236	131.426	0.013716	0.100977	0.135832	0.891954	0.90899	Multidrug resistance transporter%2C Bcr/CflA family	NA	K07552	bcr, tcaB; MFS transporter, DHA1 family, multidrug resistance protein	193	02000	Transporters [BR:ko02000],	09183	09180
D|1136176.5.peg.33	1	44087	44368	+	282	105	101	89	114	121	96	88	84	92	60	73	93	70.7565	70.6718	62.8223	84.0667	80.005	62.681	133.269	117.498	120.945	92.0043	103.331	139.242	94.7743	-0.713913	0.118499	-6.02465	1.69e-09	4.74e-09	D01199646: hypothetical protein	NA			14
D|1136176.5.peg.34	1	44454	44912	-	459	300	282.5	291	313.5	289	344	97.5	119.5	151.5	126	158.5	148.5	202.161	197.321	205.408	230.815	191.086	224.607	146.898	166.456	198.507	193.209	223.649	221.589	200.142	0.120272	0.098669	1.21895	0.222864	0.265165	INTEGRAL MEMBRANE PROTEIN (Rhomboid family)	NA	K15977	K15977; putative oxidoreductase	58	99999	Others,	09191	09190
D|1136176.5.peg.35	1	44914	45681	-	768	451.5	428.5	442.5	464	470.5	530	211.5	253	286	242	265	267	303.916	299.48	311.994	342.166	310.763	346.051	319.542	353.893	375.98	371.084	375.107	399.759	342.478	-0.198179	0.0675983	-2.93172	0.00337091	0.00530074	Glutamate synthase [NADPH] large chain (EC 1.4.1.13)	KEGG_ENZYME:1.4.1.13			32
D|1136176.5.peg.36	1	45678	46538	-	861	2096.5	2066	2359.5	2314.5	2509.5	2631	1356	1691.5	1957.5	1629	1613.5	1499.5	1412.43	1445.62	1665.14	1706.41	1658.95	1717.85	2053.55	2365.35	2572.7	2497.92	2283.2	2244.34	1968.62	-0.545375	0.071692	-7.60719	2.8e-14	1.06e-13	Uncharacterized protein conserved in bacteria%2C NMA0228-like	NA	K09930	K09930; uncharacterized protein	187	99997	Function unknown,	09194	09190
D|1136176.5.peg.37	1	46603	46863	-	261	15728	14584	13849	14685	17269	16842	5381	4996	5687	5373	5390	5904	10598.6	10204.7	9775.57	10829.1	11418.2	10996.6	8149.07	6988.34	7476.21	8238.98	7629.54	8839.62	9262.05	0.431729	0.0614878	7.02138	2.2e-12	7.31e-12	Putative signal peptide protein	NA			41
D|1136176.5.peg.38	1	47128	49302	+	2175	550	504	541	479	608	544	435	435	397	312	376	362	370.629	352.659	381.875	353.228	402.009	355.192	658.771	608.473	521.902	478.422	532.228	541.996	463.115	-0.592469	0.0768011	-7.71433	1.22e-14	4.7e-14	ATP-dependent DNA helicase UvrD/PcrA	NA	K03657	uvrD, pcrA; DNA helicase II / ATP-dependent DNA helicase PcrA [EC:3.6.4.12]	573	03420 03430 03400	Nucleotide excision repair [PATH:ko03420], Mismatch repair [PATH:ko03430], DNA repair and recombination proteins [BR:ko03400],	09124 09182	09120 09180
D|1136176.5.peg.39	1	49438	49935	-	498	532	540	553	478	501	520	327	294	278	284	299	298	358.5	377.849	390.345	352.49	331.26	339.522	495.214	411.243	365.463	435.487	423.234	446.173	393.898	-0.259404	0.0736946	-3.51998	0.000432	0.000762	Thiol peroxidase%2C Tpx-type (EC 1.11.1.15)	KEGG_ENZYME:1.11.1.15	K11065	tpx; thioredoxin-dependent peroxiredoxin [EC:1.11.1.24]	105	99980	Enzymes with EC numbers,	09191	09190
D|1136176.5.peg.40	1	50740	52497	-	1758	677	606	593	655	686	712	403	461	444	312	450	394	456.211	424.031	418.58	483.015	453.582	464.884	610.309	644.841	583.689	478.422	636.975	589.907	520.37	-0.39332	0.0716685	-5.48804	4.06e-08	1.04e-07	Gamma-glutamyltranspeptidase (EC 2.3.2.2)	KEGG_ENZYME:2.3.2.2	K00681	ggt; gamma-glutamyltranspeptidase / glutathione hydrolase [EC:2.3.2.2 3.4.19.13]	480	00430 00460 00480 01002	Taurine and hypotaurine metabolism [PATH:ko00430], Cyanoamino acid metabolism [PATH:ko00460], Glutathione metabolism [PATH:ko00480], Peptidases and inhibitors [BR:ko01002],	09106 09181	09100 09180
D|1136176.5.peg.41	1	52589	53251	-	663	344	315	295	310	343	337	140	157	163	168	140	105	231.812	220.412	208.231	228.602	226.791	220.036	212.018	219.61	214.282	257.612	198.17	157.209	216.232	0.0860514	0.0878278	0.979774	0.327198	0.375106	L-lysine permease	NA			31
D|1136176.5.peg.42	1	53351	54145	-	795	222	202	205	195	244	207	83	106	105	97	74	104	149.599	141.344	144.703	143.798	161.332	135.156	125.696	148.271	138.035	148.74	104.747	155.711	141.428	0.0945817	0.0945264	1.00058	0.317028	0.364087	L-rhamnose operon transcriptional activator RhaR	NA			75
D|1136176.5.peg.43	1	54226	55140	-	915	131	139	139	153	140	133	39	81	47	49	42	54	88.2771	97.2612	98.1157	112.826	92.5678	86.8393	59.0622	113.302	61.7869	75.1368	59.451	80.8502	85.4564	0.355292	0.14372	2.47211	0.0134317	0.0196564	Protein rarD	NA	K05786	rarD; chloramphenicol-sensitive protein RarD	184	02000	Transporters [BR:ko02000],	09183	09180
D|1136176.5.peg.44	1	55320	57158	+	1839	227	230	215	191	215	219	92	92	154	75	146	107	152.969	160.936	151.762	140.849	142.158	142.991	139.326	128.688	202.451	115.005	206.663	160.203	153.667	-0.0989911	0.129248	-0.765903	0.443734	0.492543	ATP-dependent DNA helicase RecQ	NA	K03654	recQ; ATP-dependent DNA helicase RecQ [EC:3.6.4.12]	440	03018 03019 03400	RNA degradation [PATH:ko03018], Messenger RNA biogenesis [BR:ko03019], DNA repair and recombination proteins [BR:ko03400],	09123 09182	09120 09180
D|1136176.5.peg.45	1	57239	57550	+	312	49	38	54	51	57	47	21	23	21	15	18	18	33.0197	26.5894	38.1169	37.6088	37.6883	30.6876	31.8027	32.1721	27.6069	23.0011	25.479	26.9501	30.8935	0.283768	0.177223	1.60119	0.109335	0.138708	Aminopeptidase N	NA			25
D|1136176.5.peg.46	1	57829	58500	+	672	221	326	238	197	226	280	45	86	123	57	118	77	148.926	228.109	167.997	145.273	149.431	182.82	68.1487	120.296	161.698	87.4041	167.029	115.286	145.201	0.502504	0.193305	2.59954	0.00933479	0.0139287	Putative preQ0 transporter	NA	K09125	yhhQ; queuosine precursor transporter	225	02000	Transporters [BR:ko02000],	09183	09180
D|1136176.5.peg.47	1	58603	60096	-	1494	490.5	460	434	425	491.5	474.5	390.5	362.5	430.5	268	352	331.5	330.197	321.871	306.347	313.407	324.648	309.487	590.622	506.361	565.284	410.952	498.256	495.582	414.418	-0.687329	0.0767334	-8.95737	3.33e-19	1.67e-18	Guanosine-5'-triphosphate%2C3'-diphosphate pyrophosphatase (EC 3.6.1.40)	KEGG_ENZYME:3.6.1.40	K01524	ppx-gppA; exopolyphosphatase / guanosine-5'-triphosphate,3'-diphosphate pyrophosphatase [EC:3.6.1.11 3.6.1.40]	301	00230	Purine metabolism [PATH:ko00230],	09104	09100
D|1136176.5.peg.48	1	60103	61413	-	1311	876.5	874	809	751	838.5	871.5	643.5	632.5	597.5	426	571	557.5	590.311	611.556	571.047	553.808	554.084	568.699	973.769	884.034	784.825	653.23	808.25	833.955	698.964	-0.517592	0.0801894	-6.45462	1.08e-10	3.26e-10	ATP-dependent RNA helicase RhlB	NA	K03732	rhlB; ATP-dependent RNA helicase RhlB [EC:3.6.4.13]	323	03018 03019	RNA degradation [PATH:ko03018], Messenger RNA biogenesis [BR:ko03019],	09123 09182	09120 09180
D|1136176.5.peg.49	1	61525	61851	+	327	120	139	104	101	133	123	62	61	67	42	75	60	80.8646	97.2612	73.4103	74.4802	87.9394	80.31	93.8937	85.326	88.0792	64.403	106.162	89.8335	85.1636	-0.0959907	0.118612	-0.809286	0.418351	0.466711	Thioredoxin	NA	K03671	trxA; thioredoxin 1	89	04621 05132 05012 05418 03110	NOD-like receptor signaling pathway [PATH:ko04621], Salmonella infection [PATH:ko05132], Parkinson disease [PATH:ko05012], Fluid shear stress and atherosclerosis [PATH:ko05418], Chaperones and folding catalysts [BR:ko03110],	09151 09171 09164 09166 09182	09150 09160 09180
D|1136176.5.peg.50	1	62054	63313	+	1260	1116	1162	1119	1047	1161	1226	564	525	714	521	653	633	752.04	813.075	789.866	772.087	767.651	800.489	854.13	734.363	938.635	798.904	924.321	947.744	824.442	-0.1472	0.0639078	-2.30332	0.0212606	0.030218	Transcription termination factor Rho	NA	K03628	rho; transcription termination factor Rho	389	03018 03021 03019	RNA degradation [PATH:ko03018], Transcription machinery [BR:ko03021], Messenger RNA biogenesis [BR:ko03019],	09123 09182	09120 09180
D|1136176.5.peg.51	1	63424	64419	+	996	764	798	822	798	904	873	833	816	826	679	759	755	514.838	558.377	580.224	588.467	597.723	570.005	1261.51	1141.41	1085.87	1041.18	1074.36	1130.41	845.365	-0.981827	0.0571369	-17.1838	3.51e-66	8.15e-65	D01199582: hypothetical protein	NA			67
D|1136176.5.peg.52	1	64518	66359	+	1842	1403.5	1379	1331.5	1301.5	1504	1410	954	1010.5	963	752	917	799.5	945.441	964.915	939.51	959.393	994.442	920.627	1444.75	1412.78	1265.97	1153.12	1298.01	1196.28	1124.6	-0.441251	0.0580202	-7.60512	2.85e-14	1.07e-13	3-polyprenyl-4-hydroxybenzoate carboxy-lyase (EC 4.1.1.-)	KEGG_ENZYME:4.1.1.-	K03182	ubiD; 4-hydroxy-3-polyprenylbenzoate decarboxylase [EC:4.1.1.98]	368	00130	Ubiquinone and other terpenoid-quinone biosynthesis [PATH:ko00130],	09108	09100
D|1136176.5.peg.53	1	66356	66625	+	270	213.5	184.5	200.5	185.5	195.5	213	102.5	96.5	119.5	86	105	119.5	143.535	128.749	141.174	136.424	128.934	139.073	154.47	134.284	156.439	131.873	148.627	178.17	143.479	-0.144129	0.0875547	-1.64616	0.0997299	0.127294	Ferredoxin	NA			5
D|1136176.5.peg.54	1	66646	67359	+	714	341	291.5	288	298	314.5	338	138.5	147	155.5	145	173	153	229.79	203.619	203.29	219.753	207.616	220.689	208.989	205.622	203.765	222.344	244.881	229.076	216.62	-0.0318264	0.0736748	-0.431985	0.665752	0.709138	NAD(P)H-flavin reductase (EC 1.5.1.29) (EC 1.16.1.3)	KEGG_ENZYME:1.5.1.29,KEGG_ENZYME:1.16.1.3	K05368	fre, ubiB; NAD(P)H-flavin reductase [EC:1.5.1.41]	136	00740	Riboflavin metabolism [PATH:ko00740],	09108	09100
D|1136176.5.peg.55	1	79607	80788	-	1182	3388	3334	3343.5	3167.5	3600.5	3635	1633	1802	2206	1430	2043	1872.5	2283.08	2332.87	2359.72	2335.43	2380.31	2373.39	2473.04	2520.61	2900.04	2192.77	2891.87	2802.81	2487.16	-0.166522	0.06648	-2.50484	0.0122508	0.0180191	Uncharacterized protein EC-HemY%2C likely associated with heme metabolism based on gene clustering with hemC%2C hemD in Proteobacteria (unrelated to HemY-type PPO in GramPositives)	NA	K02498	hemY; HemY protein	145	99987	Cofactor metabolism,	09191	09190
D|1136176.5.peg.56	1	80788	82014	-	1227	5098.5	4865.5	5003.5	4668	5313	5420.5	2661	3115.5	3408.5	2791	3158	3097.5	3435.4	3404.14	3531.46	3442.31	3512.95	3538.86	4029.86	4357.22	4480.21	4279.73	4470.15	4636.91	3926.6	-0.331633	0.0352615	-9.40498	5.2e-21	2.86e-20	Uroporphyrinogen-III methyltransferase (EC 2.1.1.107)	KEGG_ENZYME:2.1.1.107	K02496	hemX; uroporphyrin-III C-methyltransferase [EC:2.1.1.107]	113	00860	Porphyrin and chlorophyll metabolism [PATH:ko00860],	09108	09100
D|1136176.5.peg.57	1	82034	82762	-	729	1522	1521.5	1497	1435	1677.5	1663	866	1131.5	1086.5	938	991	909	1025.63	1064.28	1056.68	1058.21	1108.83	1085.82	1311.48	1582.03	1427.67	1438.33	1402.76	1360.98	1243.56	-0.413928	0.0468989	-8.82596	1.09e-18	5.3e-18	Uroporphyrinogen-III synthase (EC 4.2.1.75)	KEGG_ENZYME:4.2.1.75	K01719	hemD, UROS; uroporphyrinogen-III synthase [EC:4.2.1.75]	102	00860	Porphyrin and chlorophyll metabolism [PATH:ko00860],	09108	09100
D|1136176.5.peg.58	1	82765	83703	-	939	952.5	953	948	882.5	1000	999.5	777	845	778	705	767	730	641.526	666.834	669.163	650.411	661.198	652.274	1176.7	1181.98	1022.77	1081.05	1085.69	1092.97	881.88	-0.752112	0.0448175	-16.7817	3.32e-63	7.28e-62	Porphobilinogen deaminase (EC 2.5.1.61)	KEGG_ENZYME:2.5.1.61	K01749	hemC, HMBS; hydroxymethylbilane synthase [EC:2.5.1.61]	320	00860	Porphyrin and chlorophyll metabolism [PATH:ko00860],	09108	09100
D|1136176.5.peg.59	1	84048	86576	+	2529	4505	4322	4320	4139	4618	4498	3615	3474	3468	3425	3038	3325	3035.79	3024.19	3049.35	3052.21	3053.41	2936.87	5474.61	4859.39	4559.08	5251.91	4300.29	4978.28	3964.61	-0.696579	0.0564907	-12.3309	6.18e-35	5.69e-34	Adenylate cyclase (EC 4.6.1.1)	KEGG_ENZYME:4.6.1.1	K05851	cyaA; adenylate cyclase, class 1 [EC:4.6.1.1]	512	00230 05111 02026	Purine metabolism [PATH:ko00230], Biofilm formation - Vibrio cholerae [PATH:ko05111], Biofilm formation - Escherichia coli [PATH:ko02026],	09104 09145	09100 09140
D|1136176.5.peg.60	1	86645	86959	-	315	219	220	213	226	219	241	83	61	83	57	80	82	147.578	153.939	150.35	166.659	144.802	157.355	125.696	85.326	109.113	87.4041	113.24	122.772	130.353	0.516892	0.0979855	5.27519	1.33e-07	3.26e-07	Frataxin homolog CyaY%2C facilitates iron supply for heme A synthesis or Fe-S cluster assembly	NA	K06202	cyaY; CyaY protein	62	99994	Others,	09193	09190
D|1136176.5.peg.61	1	87035	87151	+	117	79	70	64	61	73	70	27	25	19	32	35	24	53.2358	48.9804	45.1756	44.9831	48.2675	45.7049	40.8892	34.9697	24.9777	49.0689	49.5425	35.9334	43.4774	0.292953	0.152896	1.91602	0.0553619	0.0735098	putative lipoprotein L	NA			10
D|1136176.5.peg.62	1	87194	88447	+	1254	545	596	580.5	525.5	621.5	617	498.5	510.5	569.5	419	502.5	447	367.26	417.033	409.404	387.149	410.604	402.856	754.179	713.382	748.016	642.496	710.581	669.26	552.685	-0.824736	0.0561174	-14.6966	6.78e-49	9.92e-48	Diaminopimelate decarboxylase (EC 4.1.1.20)	KEGG_ENZYME:4.1.1.20	K01586	lysA; diaminopimelate decarboxylase [EC:4.1.1.20]	323	00300	Lysine biosynthesis [PATH:ko00300],	09105	09100
D|1136176.5.peg.63	1	88459	89289	+	831	407	433	394.5	380.5	425.5	469	294.5	285.5	304.5	210	324.5	232	274.266	302.979	278.112	280.222	281.009	306.223	445.238	398.654	399.643	322.015	458.622	347.356	341.195	-0.462001	0.0839694	-5.50201	3.75e-08	9.6e-08	Diaminopimelate epimerase (EC 5.1.1.7)	KEGG_ENZYME:5.1.1.7	K01778	dapF; diaminopimelate epimerase [EC:5.1.1.7]	271	00300	Lysine biosynthesis [PATH:ko00300],	09105	09100
D|1136176.5.peg.64	1	89335	90033	+	699	248	239	239	230.5	234.5	236.5	83	76.5	125.5	81	95	84.5	167.12	167.233	168.702	169.608	154.72	154.091	125.696	106.308	164.327	124.206	134.472	125.767	146.854	0.32482	0.0927357	3.50264	0.000461	0.000811	Protein of unknown function DUF484	NA	K09921	K09921; uncharacterized protein	57	99997	Function unknown,	09194	09190
D|1136176.5.peg.65	1	90002	90934	+	933	1005.5	994.5	1061.5	1050	1088.5	1121	398.5	379.5	413	432.5	442	394	677.241	695.522	748.926	774.299	719.384	731.931	602.737	530.14	542.936	662.431	625.651	589.907	658.425	0.292146	0.0614799	4.7519	2.02e-06	4.45e-06	Tyrosine recombinase XerC	NA	K03733	xerC; integrase/recombinase XerC	192	03036	Chromosome and associated proteins [BR:ko03036],	09182	09180
D|1136176.5.peg.66	1	90950	91666	+	717	3273.5	2682.5	2711.5	3004.5	2931	2908.5	733.5	537	446.5	739.5	357	411.5	2205.58	1876.65	1913.61	2215.23	1937.97	1898.71	1110.07	751.149	586.318	1133.19	505.333	615.36	1395.76	1.35822	0.18334	7.40824	1.28e-13	4.61e-13	Putative FMN hydrolase (EC 3.1.3.-)%3B 5-Amino-6-(5'-phosphoribitylamino)uracil phosphatase	KEGG_ENZYME:3.1.3.-	K20862	yigB; FMN hydrolase / 5-amino-6-(5-phospho-D-ribitylamino)uracil phosphatase [EC:3.1.3.102 3.1.3.104]	118	00740	Riboflavin metabolism [PATH:ko00740],	09108	09100
D|1136176.5.peg.67	1	91835	94333	+	2499	1572	1390	1371	1411	1470	1526	499	487	439	566	409	403	1059.33	972.612	967.745	1040.51	971.961	996.367	755.693	681.209	577.116	867.907	578.939	603.382	839.397	0.5653	0.0953184	5.93065	3.02e-09	8.35e-09	Sensory box/GGDEF family protein	NA			21
D|1136176.5.peg.68	1	94526	97006	+	2481	830	782	790	737	836	848	377	485	494	366	429	363	559.313	547.182	557.636	543.484	552.762	553.682	570.935	678.412	649.419	561.226	607.249	543.493	577.066	-0.125993	0.0564648	-2.23136	0.0256576	0.0359501	Sensory box/GGDEF family protein	NA	K20964	cdpA; c-di-GMP phosphodiesterase [EC:3.1.4.52]	133	05111	Biofilm formation - Vibrio cholerae [PATH:ko05111],	09145	09140
D|1136176.5.peg.69	1	97139	97735	-	597	427.5	421	419	399	414.5	434.5	185.5	198.5	293	176	221.5	202.5	287.743	294.582	295.759	294.234	273.736	283.37	280.167	276.96	385.182	269.879	312.825	302.44	296.406	-0.0834395	0.0814028	-1.02502	0.305354	0.35225	D00920769: hypothetical protein	NA	K05812	yfiP; DTW domain-containing protein	67	99996	General function prediction only,	09194	09190
D|1136176.5.peg.70	1	97738	99282	-	1545	2925.5	2900	2808	2621	3025.5	3042.5	1425.5	1369.5	1490	1323	1399.5	1366.5	1971.07	2029.19	1982.08	1932.8	2000.12	1986.2	2158.04	1914.94	1958.78	2028.69	1980.28	2045.21	1998.95	-0.021259	0.0338031	-0.628907	0.52941	0.577289	D028593: membrane protein	NA			NA
D|1136176.5.peg.71	1	99322	99789	+	468	161	157	162	147	156	170	66	73	74	62	75	92	108.493	109.856	114.351	108.402	103.147	110.998	99.9514	102.111	97.2815	95.0711	106.162	137.745	107.797	0.0394345	0.0993484	0.396932	0.691418	0.732442	D006231: RNA-binding protein	NA			131
D|1136176.5.peg.72	1	99877	100704	-	828	259	283	301	266	296	292	154	165	180	140	141	145	174.533	198.021	212.466	196.156	195.715	190.655	233.22	230.8	236.631	214.677	199.585	217.098	208.296	-0.191857	0.075494	-2.54136	0.0110423	0.016314	HMP-PP hydrolase (pyridoxal phosphatase) Cof%2C detected in genetic screen for thiamin metabolic genes (PMID:15292217)	NA			148
D|1136176.5.peg.73	1	100891	101871	-	981	444	457	477	403	466	473	234	261	280	235	224	254	299.199	319.772	336.699	297.183	308.118	308.834	354.373	365.084	368.092	360.35	317.072	380.295	334.589	-0.198216	0.0622313	-3.18514	0.00144684	0.00239011	Lysophospholipase L2 (EC 3.1.1.5)	KEGG_ENZYME:3.1.1.5	K01048	pldB; lysophospholipase [EC:3.1.1.5]	126	00564	Glycerophospholipid metabolism [PATH:ko00564],	09103	09100
D|1136176.5.peg.74	1	101953	102570	+	618	441	459	442	373	472	458	208	204	255	210	212	191	297.177	321.172	311.994	275.06	312.086	299.041	314.998	285.353	335.227	322.015	300.086	285.97	305.015	-0.0215202	0.0662366	-0.3249	0.745257	0.780217	Homoserine/homoserine lactone efflux protein	NA	K05834	rhtB; homoserine/homoserine lactone efflux protein	115	02000	Transporters [BR:ko02000],	09183	09180
D|1136176.5.peg.75	1	102616	103836	+	1221	366	371	369	327	387	379	161	196	209	162	192	150	246.637	259.596	260.465	241.139	255.884	247.459	243.821	274.162	274.754	248.412	271.776	224.584	254.057	-0.0279608	0.0679343	-0.411587	0.680643	0.722677	Predicted signal transduction protein	NA			83
D|1136176.5.peg.76	1	103936	104277	+	342	25	20	19	22	22	24	15	13	5	17	8	10	16.8468	13.9944	13.4115	16.2234	14.5464	15.6702	22.7162	18.1842	6.57307	26.0679	11.324	14.9723	15.8775	-0.116786	0.245138	-0.476408	0.633783	0.679608	Transcriptional regulator%2C ArsR family	NA	K03892	arsR; ArsR family transcriptional regulator, arsenate/arsenite/antimonite-responsive transcriptional repressor	55	03000	Transcription factors [BR:ko03000],	09182	09180
D|1136176.5.peg.77	1	104319	105320	+	1002	163	178	153	135	172	162	113	77	106	61	86	92	109.841	124.55	107.998	99.5527	113.726	105.774	171.129	107.707	139.349	93.5377	121.733	137.745	119.387	-0.221106	0.119916	-1.84383	0.0652079	0.0857007	NAD-dependent glyceraldehyde-3-phosphate dehydrogenase (EC 1.2.1.12)	KEGG_ENZYME:1.2.1.12	K00134	GAPDH, gapA; glyceraldehyde 3-phosphate dehydrogenase [EC:1.2.1.12]	254	00010 00710 04066 05130 05132 05010 05415 04131 04147	Glycolysis / Gluconeogenesis [PATH:ko00010], Carbon fixation in photosynthetic organisms [PATH:ko00710], HIF-1 signaling pathway [PATH:ko04066], Pathogenic Escherichia coli infection [PATH:ko05130], Salmonella infection [PATH:ko05132], Alzheimer disease [PATH:ko05010], Diabetic cardiomyopathy [PATH:ko05415], Membrane trafficking [BR:ko04131], Exosome [BR:ko04147],	09101 09102 09132 09171 09164 09166 09182 09183	09100 09130 09160 09180
D|1136176.5.peg.78	1	105350	105853	+	504	113	91	101	101	112	109	35	39	46	44	66	51	76.1475	63.6746	71.2927	74.4802	74.0542	71.169	53.0045	54.5527	60.4723	67.4698	93.423	76.3585	69.6749	0.0888788	0.128258	0.692968	0.48833	0.537036	Predicted protein-tyrosine phosphatase	NA			36
D|1136176.5.peg.79	1	105951	107171	+	1221	280	280	229	240	264	281	64	63	83	74	81	83	188.684	195.922	161.644	176.983	174.556	183.472	96.9226	88.1236	109.113	113.472	114.655	124.27	143.985	0.743518	0.0952141	7.80891	5.77e-15	2.29e-14	Permease of the major facilitator superfamily	NA			277
D|1136176.5.peg.80	1	107341	108354	+	1014	2333	2079	2096	2074	2302	2283	977	1214	1253	1160	1251	1259	1572.14	1454.72	1479.5	1529.42	1522.08	1490.63	1479.58	1698.13	1647.21	1778.75	1770.79	1885.01	1609	-0.181069	0.0541876	-3.34153	0.000833	0.00142614	D01201461: hypothetical protein	NA			122
D|1136176.5.peg.81	1	108429	108758	-	330	384	396	405	371	398	419	141	180	211	155	207	158	258.767	277.089	285.877	273.586	263.157	273.576	213.533	251.782	277.384	237.678	293.008	236.562	261.833	0.108109	0.0741997	1.457	0.145115	0.180114	D01199558: hypothetical protein	NA			23
D|1136176.5.peg.82	1	109003	109377	+	375	1393	1259	1290	1363	1392	1371	614	640	631	659	567	570	938.703	880.948	910.57	1005.11	920.388	895.163	929.851	895.224	829.522	1010.51	802.588	853.419	906	0.0619205	0.0601927	1.02871	0.303618	0.350509	D00919732: hypothetical protein	NA			16
D|1136176.5.peg.83	1	109572	109718	+	147	4	6	4	5	8	9	2	4	1	4	3	1	2.69549	4.19832	2.82347	3.68714	5.28959	5.87634	3.02883	5.59515	1.31461	6.13362	4.2465	1.49723	3.86552	0.190557	0.481608	0.395669	0.692349	0.733197	hypothetical protein	NA			NA
D|1136176.5.peg.84	1	110305	110925	+	621	138	138	126	120	151	155	76	58	86	62	96	93	92.9942	96.5614	88.9394	88.4913	99.8409	101.204	115.096	81.1297	113.057	95.0711	135.888	139.242	103.96	-0.25664	0.115683	-2.21848	0.0265223	0.0370721	Putative inner membrane protein	NA			32
D|1136176.5.peg.85	1	111016	111252	+	237	36	35	42	20	38	52	18	21	33	25	28	12	24.2594	24.4902	29.6465	14.7485	25.1255	33.9522	27.2595	29.3745	43.3823	38.3351	39.634	17.9667	29.0145	-0.366091	0.216086	-1.69419	0.0902287	0.115958	D01200152: hypothetical protein	NA			31
D|1136176.5.peg.86	1	111468	112052	+	585	77	93	79	74	78	87	33	36	28	24	30	36	51.8881	65.074	55.7636	54.5696	51.5735	56.8047	49.9757	50.3563	36.8092	36.8017	42.465	53.9001	50.4985	0.314982	0.141336	2.2286	0.0258406	0.0361738	Multiple antibiotic resistance protein marC	NA			109
D|1136176.5.peg.87	1	112170	112436	-	267	571	532	558.5	578	629.5	565	447	500.5	554.5	472	474.5	427.5	384.781	372.251	393.874	426.233	415.894	368.904	676.944	699.394	728.296	723.767	670.947	639.315	541.717	-0.810399	0.0564868	-14.3467	1.12e-46	1.54e-45	D01199926: hypothetical protein	NA	K08993	yhhL; putative membrane protein	27	99996	General function prediction only,	09194	09190
D|1136176.5.peg.88	1	112447	113049	-	603	2169	2043	2042.5	1982	2212.5	2311	1399	1447.5	1485.5	1496	1419.5	1354.5	1461.63	1429.53	1441.38	1461.58	1462.57	1508.91	2118.67	2024.05	1952.2	2293.97	2008.59	2027.24	1765.86	-0.502316	0.041817	-12.0122	3.06e-33	2.62e-32	Ribosomal RNA small subunit methyltransferase D	NA	K08316	rsmD; 16S rRNA (guanine966-N2)-methyltransferase [EC:2.1.1.171]	112	03009	Ribosome biogenesis [BR:ko03009],	09182	09180
D|1136176.5.peg.89	1	113280	114533	+	1254	566	500	509	454	540	541	233	274	294	222	276	247	381.411	349.86	359.287	334.792	357.047	353.234	352.859	383.268	386.497	340.416	390.678	369.815	363.264	-0.0596563	0.0592804	-1.00634	0.314252	0.361257	Signal recognition particle receptor protein FtsY (alpha subunit) (TC 3.A.5.1.1)	NA	K03110	ftsY; fused signal recognition particle receptor	212	03060 03070 02024 02044	Protein export [PATH:ko03060], Bacterial secretion system [PATH:ko03070], Quorum sensing [PATH:ko02024], Secretion system [BR:ko02044],	09123 09131 09145 09183	09120 09130 09140 09180
D|1136176.5.peg.90	1	114611	115288	+	678	659	693	680.5	643	687	771	334.5	355.5	392	342	403	336	444.081	484.906	479.99	474.166	454.243	503.407	505.815	496.57	515.329	524.424	570.446	503.068	496.37	-0.1335	0.0549046	-2.4315	0.0150365	0.0218532	Cell division transporter%2C ATP-binding protein FtsE (TC 3.A.5.1.1)	NA	K09812	ftsE; cell division transport system ATP-binding protein	162	02010 03036 02000	ABC transporters [PATH:ko02010], Chromosome and associated proteins [BR:ko03036], Transporters [BR:ko02000],	09131 09182 09183	09130 09180
D|1136176.5.peg.91	1	115275	116243	+	969	607	544	562.5	518	587	612	222.5	232.5	253	207	237	204	409.04	380.648	396.698	381.987	388.123	399.591	336.2	324.519	332.597	317.415	335.473	305.434	358.977	0.271304	0.0570476	4.75575	1.98e-06	4.37e-06	Cell division protein FtsX	NA	K09811	ftsX; cell division transport system permease protein	126	02010 03036 02000	ABC transporters [PATH:ko02010], Chromosome and associated proteins [BR:ko03036], Transporters [BR:ko02000],	09131 09182 09183	09130 09180
D|1136176.5.peg.92	1	116421	117278	+	858	3548	3714	3368	2979	3461	3626	1540	1423	1782	1532	1660	1794	2390.9	2598.76	2377.36	2196.8	2288.41	2367.51	2332.2	1990.47	2342.64	2349.18	2349.73	2686.02	2355.83	0.0175504	0.0667863	0.262784	0.792717	0.822851	RNA polymerase sigma factor RpoH	NA	K03089	rpoH; RNA polymerase sigma-32 factor	218	03021	Transcription machinery [BR:ko03021],	09182	09180
D|1136176.5.peg.93	1	117528	117617	+	90	1	1	1	1	4	2	0	1	1	1	0	1	0.673871	0.699721	0.705868	0.737427	2.64479	1.30585	0	1.39879	1.31461	1.5334	0	1.49723	1.04263	0.249135	0.920939	0.270523	0.786758	0.81758	hypothetical protein	NA			NA
D|1136176.5.peg.94	1	117697	118020	+	324	179	170	156	157	164	184	86	90	77	69	80	80	120.623	118.953	110.115	115.776	108.437	120.139	130.24	125.891	101.225	105.805	113.24	119.778	115.852	-0.00206881	0.0940546	-0.0219958	0.982451	0.98521	Thiosulfate sulfurtransferase GlpE (EC 2.8.1.1)	KEGG_ENZYME:2.8.1.1	K02439	glpE; thiosulfate sulfurtransferase [EC:2.8.1.1]	68	00920	Sulfur metabolism [PATH:ko00920],	09102	09100
D|1136176.5.peg.95	1	118076	118918	+	843	309	289	288	295	326	317	255	273	262	195	221	197	208.226	202.219	203.29	217.541	215.551	206.978	386.176	381.869	344.429	299.014	312.825	294.953	272.756	-0.688643	0.0776744	-8.86576	7.6e-19	3.74e-18	GlpG protein (membrane protein of glp regulon)	NA	K02441	glpG; GlpG protein	165	99996	General function prediction only,	09194	09190
D|1136176.5.peg.96	1	119009	119416	-	408	497	411	430	469	444	454	200	159	158	165	111	131	334.914	287.585	303.523	345.853	293.572	296.429	302.883	222.407	207.709	253.012	157.12	196.137	266.762	0.477216	0.123576	3.86172	0.000113	0.000212	Flagellar biosynthesis protein FliL	NA	K02415	fliL; flagellar protein FliL	58	02040 02035	Flagellar assembly [PATH:ko02040], Bacterial motility proteins [BR:ko02035],	09142 09183	09140 09180
D|1136176.5.peg.97	1	119681	120121	+	441	179	170.5	175.5	177.5	186	167.5	110.5	130	136	105	137	126	120.623	118.953	123.527	130.525	122.983	109.039	166.586	181.842	178.788	161.007	193.923	188.65	149.704	-0.564525	0.0838617	-6.73162	1.68e-11	5.34e-11	Chorismate--pyruvate lyase (EC 4.1.3.40)	KEGG_ENZYME:4.1.3.40	K03181	ubiC; chorismate lyase [EC:4.1.3.40]	55	00130	Ubiquinone and other terpenoid-quinone biosynthesis [PATH:ko00130],	09108	09100
D|1136176.5.peg.98	1	120122	120976	+	855	67	86.5	79.5	67.5	80	89.5	55.5	45	48	34	51	45	45.1494	60.176	55.7636	49.4076	52.8959	58.1105	83.2928	62.9454	63.1015	52.1358	72.1905	67.3752	60.212	-0.317665	0.130286	-2.43821	0.0147604	0.0214857	4-hydroxybenzoate polyprenyltransferase (EC 2.5.1.39)	KEGG_ENZYME:2.5.1.39	K03179	ubiA; 4-hydroxybenzoate polyprenyltransferase [EC:2.5.1.39]	226	00130 01006	Ubiquinone and other terpenoid-quinone biosynthesis [PATH:ko00130], Prenyltransferases [BR:ko01006],	09108 09181	09100 09180
D|1136176.5.peg.99	1	121078	123501	-	2424	2765	2741	2785	2717	3036	3068	942	1179	1340	1006	1204	1181	1863.25	1917.93	1965.84	2003.59	2007.4	2003.18	1426.58	1649.17	1761.58	1542.6	1704.26	1768.22	1801.14	0.254795	0.0545733	4.66887	3.03e-06	6.6e-06	Glycerol-3-phosphate acyltransferase (EC 2.3.1.15)	KEGG_ENZYME:2.3.1.15	K00631	plsB; glycerol-3-phosphate O-acyltransferase [EC:2.3.1.15]	504	00561 00564 01004	Glycerolipid metabolism [PATH:ko00561], Glycerophospholipid metabolism [PATH:ko00564], Lipid biosynthesis proteins [BR:ko01004],	09103 09181	09100 09180
D|1136176.5.peg.100	1	123723	124085	+	363	1076	979	1046	987	1119	1057	309	351	379	319	328	311	725.086	685.027	738.338	727.841	739.881	690.144	467.954	490.974	498.239	489.156	464.284	465.637	598.547	0.581348	0.0491099	11.8377	2.49e-32	2.06e-31	Diacylglycerol kinase (EC 2.7.1.107)	KEGG_ENZYME:2.7.1.107	K00901	dgkA, DGK; diacylglycerol kinase (ATP) [EC:2.7.1.107]	65	00561 00564 04070 04072 04361 05231	Glycerolipid metabolism [PATH:ko00561], Glycerophospholipid metabolism [PATH:ko00564], Phosphatidylinositol signaling system [PATH:ko04070], Phospholipase D signaling pathway [PATH:ko04072], Axon regeneration [PATH:ko04361], Choline metabolism in cancer [PATH:ko05231],	09103 09132 09158 09161	09100 09130 09150 09160
D|1136176.5.peg.101	1	124180	124800	+	621	1107	1164	1151	1053	1236	1315	1011	871	995	808	935	910	745.976	814.475	812.454	776.511	817.241	858.599	1531.07	1218.34	1308.04	1238.99	1323.49	1362.48	1067.31	-0.72564	0.0606309	-11.9682	5.22e-33	4.4e-32	SOS-response repressor and protease LexA (EC 3.4.21.88)	KEGG_ENZYME:3.4.21.88	K01356	lexA; repressor LexA [EC:3.4.21.88]	159	01002 03400	Peptidases and inhibitors [BR:ko01002], DNA repair and recombination proteins [BR:ko03400],	09181 09182	09180
D|1136176.5.peg.102	1	124900	125778	+	879	126	134	150	145	176	154	182	167	150	144	145	154	84.9078	93.7626	105.88	106.927	116.371	100.551	275.624	233.597	197.192	220.81	205.247	230.573	164.287	-1.16156	0.101158	-11.4826	1.61e-30	1.28e-29	O-methyltransferase-related protein	NA			33
D|1136176.5.peg.103	1	125896	127251	+	1356	464	413	401	404	434	458	79	99	116	107	97	114	312.676	288.985	283.053	297.921	286.96	299.041	119.639	138.48	152.495	164.074	137.303	170.684	220.943	1.00348	0.0799841	12.5459	4.18e-36	4.03e-35	DNA-damage-inducible protein F	NA	K03327	TC.MATE, SLC47A, norM, mdtK, dinF; multidrug resistance protein, MATE family	278	02000	Transporters [BR:ko02000],	09183	09180
D|1136176.5.peg.104	1	127441	128841	-	1401	936	954	989	864	1003	969	586	668	648	435	696	589	630.744	667.533	698.104	637.137	663.182	632.686	887.447	934.39	851.87	667.031	985.188	881.866	761.431	-0.407099	0.0797464	-5.10492	3.31e-07	7.91e-07	Soluble pyridine nucleotide transhydrogenase (EC 1.6.1.1)	KEGG_ENZYME:1.6.1.1	K00322	sthA, udhA; NAD(P) transhydrogenase [EC:1.6.1.1]	381	00760	Nicotinate and nicotinamide metabolism [PATH:ko00760],	09108	09100
D|1136176.5.peg.105	1	128981	129142	+	162	191.5	169	172	169	187	169	27	38.5	12.5	26.5	23.5	25.5	128.709	118.253	121.409	124.625	123.644	110.345	40.8892	53.1539	15.7754	39.8685	32.5565	37.4306	78.8883	1.73709	0.145363	11.9501	6.49e-33	5.45e-32	soluble pyridine nucleotide transhydrogenase( EC:1.6.1.1 )	KEGG_ENZYME:1.6.1.1			4
D|1136176.5.peg.106	1	129169	129810	+	642	971	936	933.5	835.5	977.5	1003.5	447	568.5	575.5	491	555	550.5	654.329	654.939	658.575	615.752	645.991	654.886	676.944	794.511	755.903	752.902	785.602	823.474	706.151	-0.240776	0.0493926	-4.87474	1.09e-06	2.48e-06	Unsaturated fatty acid biosythesis repressor FabR%2C TetR family	NA	K22105	fabR; TetR/AcrR family transcriptional regulator, fatty acid biosynthesis regulator	152	03000	Transcription factors [BR:ko03000],	09182	09180
D|1136176.5.peg.107	1	129810	130181	+	372	401.5	445	369.5	384.5	405.5	383.5	147	162	169	149.5	176.5	194	270.222	311.376	260.465	283.172	267.785	250.071	222.619	226.604	222.17	228.477	249.128	290.462	256.879	0.191362	0.0832992	2.29729	0.0216023	0.0306754	hypothetical protein	NA			53
D|1136176.5.peg.108	1	130262	131371	-	1110	3134	3108	3113	2956	3335	3319	1677	1846	1858	1886	1689	1533	2111.91	2174.73	2197.37	2179.84	2205.1	2167.06	2539.67	2582.16	2442.55	2892	2390.78	2295.25	2348.2	-0.21579	0.0517714	-4.16814	3.07e-05	6.1e-05	tRNA (Uracil54-C5-)-methyltransferase (EC 2.1.1.35)	KEGG_ENZYME:2.1.1.35	K00557	trmA; tRNA (uracil-5-)-methyltransferase [EC:2.1.1.35]	276	03016	Transfer RNA biogenesis [BR:ko03016],	09182	09180
D|1136176.5.peg.109	1	131770	133605	+	1836	1030	993	1010	868	1090	1131	495	522	531	500	465	477	694.087	694.823	712.927	640.087	720.706	738.46	749.636	730.167	698.06	766.702	658.207	714.177	709.837	-0.0375578	0.0525302	-0.714976	0.474624	0.523824	Outer membrane vitamin B12 receptor BtuB	NA	K16092	btuB; vitamin B12 transporter	217	02000	Transporters [BR:ko02000],	09183	09180
D|1136176.5.peg.110	1	133654	134319	+	666	287	282	249	289	288	292	88	72	72	75	60	67	193.401	197.321	175.761	213.117	190.425	190.655	133.269	100.713	94.6522	115.005	84.93	100.314	149.13	0.888957	0.0982123	9.05138	1.41e-19	7.23e-19	conserved hypothetical protein [Pyrococcus horikoshii] COG2102: Predicted ATPases of PP-loop superfamily IPR002761: Domain of unknown function DUF71: B12 cluster	NA			122
D|1136176.5.peg.111	1	134380	135186	+	807	645.5	615.5	667	687	694	721.5	331.5	360	486	369	422.5	450.5	434.647	430.328	470.814	506.613	458.872	470.76	501.271	503.563	638.903	565.826	597.341	673.752	521.057	-0.329171	0.0801504	-4.10691	4.01e-05	7.88e-05	Glutamate racemase (EC 5.1.1.3)	KEGG_ENZYME:5.1.1.3	K01776	murI; glutamate racemase [EC:5.1.1.3]	157	00471 01011	D-Glutamine and D-glutamate metabolism [PATH:ko00471], Peptidoglycan biosynthesis and degradation proteins [BR:ko01011],	09106 09181	09100 09180
D|1136176.5.peg.112	1	135149	135601	-	453	2696.5	2724.5	2691	2560	2890	2995.5	1122.5	1133	1389	1054	1435.5	1307.5	1816.76	1906.04	1899.49	1887.81	1910.86	1955.52	1699.17	1584.83	1826	1616.21	2031.24	1956.87	1840.9	0.086342	0.0633257	1.36346	0.172738	0.210625	RNA-binding protein	NA			55
D|1136176.5.peg.113	1	141380	141541	-	162	8379	5478	4428	4518	4622	4856	441	855	349	401	666	826	5646.37	3833.07	3125.58	3331.7	3056.06	3170.61	667.857	1195.96	458.8	614.895	942.723	1236.71	2273.36	2.11491	0.234998	8.99967	2.26e-19	1.15e-18	hypothetical protein	NA			NA
D|1136176.5.peg.114	1	143722	143835	+	114	183	286	190	101	171	199	77	118	117	67	140	111	123.318	200.12	134.115	74.4802	113.065	129.932	116.61	165.057	153.81	102.738	198.17	166.192	139.801	-0.220842	0.208239	-1.06052	0.288909	0.334777	hypothetical protein	NA			NA
D|1136176.5.peg.115	1	147093	147254	-	162	8741	5741	4639	4853	4975	5074	2143	3930	1477	2268	3122	3675	5890.31	4017.1	3274.52	3578.74	3289.46	3312.95	3245.39	5497.23	1941.69	3477.76	4419.19	5502.3	3953.89	-0.0437827	0.228983	-0.191205	0.848365	0.870108	hypothetical protein	NA			NA
D|1136176.5.peg.116	1	153631	154971	-	1341	971	989	956	859	1043	1029	485	468	461	420	424	414	654.329	692.024	674.81	633.45	689.63	671.862	734.491	654.633	606.037	644.03	600.172	619.851	656.277	0.0590548	0.0543353	1.08686	0.277099	0.322056	CDP-diacylglycerol--serine O-phosphatidyltransferase (EC 2.7.8.8)	KEGG_ENZYME:2.7.8.8	K00998	pssA; CDP-diacylglycerol---serine O-phosphatidyltransferase [EC:2.7.8.8]	275	00564 00260	Glycerophospholipid metabolism [PATH:ko00564], Glycine, serine and threonine metabolism [PATH:ko00260],	09103 09105	09100
D|1136176.5.peg.117	1	155063	155494	-	432	456	457	431	423	468	468	247	257	294	250	254	240	307.285	319.772	304.229	311.932	309.441	305.57	374.061	359.488	386.497	383.351	359.537	359.334	340.041	-0.258519	0.0563281	-4.58952	4.44e-06	9.57e-06	Predicted acyltransferase	NA			10
D|1136176.5.peg.118	1	155561	156607	+	1047	828.5	833	866.5	791	852	880.5	408.5	464.5	457	410	446	402.5	557.965	582.867	611.282	583.305	563.341	574.576	617.881	649.037	600.779	628.696	631.313	601.885	600.244	-0.103062	0.0467661	-2.20378	0.0275396	0.0383669	UDP-N-acetylenolpyruvoylglucosamine reductase (EC 1.1.1.158)	KEGG_ENZYME:1.1.1.158	K00075	murB; UDP-N-acetylmuramate dehydrogenase [EC:1.3.1.98]	173	00520 00550 01011	Amino sugar and nucleotide sugar metabolism [PATH:ko00520], Peptidoglycan biosynthesis [PATH:ko00550], Peptidoglycan biosynthesis and degradation proteins [BR:ko01011],	09101 09107 09181	09100 09180
D|1136176.5.peg.119	1	156604	157569	+	966	1939.5	1873.5	2028.5	1901	2097	2091	888.5	1042.5	914	958.5	992	837.5	1306.64	1310.58	1431.5	1401.85	1386.53	1365.27	1344.8	1457.54	1201.56	1469	1404.18	1253.18	1361.05	0.0131556	0.0561254	0.234397	0.814677	0.841881	Biotin--protein ligase (EC 6.3.4.9%2C EC 6.3.4.10%2C EC 6.3.4.11%2C EC 6.3.4.15) / Biotin operon repressor	KEGG_ENZYME:6.3.4.9,KEGG_ENZYME:6.3.4.10,KEGG_ENZYME:6.3.4.11,KEGG_ENZYME:6.3.4.15	K03524	birA; BirA family transcriptional regulator, biotin operon repressor / biotin---[acetyl-CoA-carboxylase] ligase [EC:6.3.4.15]	186	00780 03000	Biotin metabolism [PATH:ko00780], Transcription factors [BR:ko03000],	09108 09182	09100 09180
D|1136176.5.peg.120	1	157577	158488	-	912	681	612.5	649	670	725	704.5	315	358	407	330.5	396	359	458.906	428.229	458.108	494.076	479.369	459.661	477.041	500.766	535.048	506.023	560.538	537.504	491.272	-0.167046	0.0565377	-2.95459	0.00313082	0.00495002	Pantothenate kinase (EC 2.7.1.33)	KEGG_ENZYME:2.7.1.33	K00867	coaA; type I pantothenate kinase [EC:2.7.1.33]	195	00770	Pantothenate and CoA biosynthesis [PATH:ko00770],	09108	09100
D|1136176.5.peg.121	1	159210	160394	+	1185	37700	41125	37792	35462	40274	41442	19227	21150	26284	19431	23389	24104	25404.9	28776	26676.2	26150.7	26629.1	27058.6	29117.7	29584.4	34553.3	29795.6	33107.1	36089.1	29411.9	-0.258652	0.0619896	-4.1725	3.01e-05	5.99e-05	Translation elongation factor Tu	NA	K02358	tuf, TUFM; elongation factor Tu	350	04626 03012 03029 04147	Plant-pathogen interaction [PATH:ko04626], Translation factors [BR:ko03012], Mitochondrial biogenesis [BR:ko03029], Exosome [BR:ko04147],	09159 09182 09183	09150 09180
D|1136176.5.peg.122	1	160618	160995	+	378	6177	5803.5	5749	5491	6268.5	6261	2400	2687.5	2859.5	2658	2547.5	2298.5	4162.5	4060.48	4058.04	4049.21	4144.39	4087.98	3634.6	3758.54	3758.48	4075.79	3605.28	3440.62	3902.99	0.141241	0.038539	3.66489	0.000247	0.00045	Preprotein translocase subunit SecE (TC 3.A.5.1.1)	NA	K03073	secE; preprotein translocase subunit SecE	75	03060 03070 02024 02044	Protein export [PATH:ko03060], Bacterial secretion system [PATH:ko03070], Quorum sensing [PATH:ko02024], Secretion system [BR:ko02044],	09123 09131 09145 09183	09120 09130 09140 09180
D|1136176.5.peg.123	1	161009	161557	+	549	7596	7270.5	7131	6895	7972.5	7875	3252	3443.5	4113.5	3455	3562.5	3220.5	5118.73	5086.97	5033.55	5084.56	5271.07	5141.8	4924.88	4816.03	5407.01	5297.91	5042.01	4821.07	5087.13	0.0200906	0.0355044	0.565863	0.571487	0.619039	Transcription antitermination protein NusG	NA	K02601	nusG; transcription termination/antitermination protein NusG	164	03021 03009	Transcription machinery [BR:ko03021], Ribosome biogenesis [BR:ko03009],	09182	09180
D|1136176.5.peg.124	1	161771	162199	+	429	4354.5	4497.5	3899.5	3550	4082	4465.5	789	1175.5	1361.5	780	1302	1323.5	2934.04	3146.64	2752.18	2617.87	2699.01	2915.32	1194.87	1643.58	1789.19	1196.06	1842.98	1980.83	2226.05	0.822513	0.124953	6.58259	4.62e-11	1.43e-10	LSU ribosomal protein L11p (L12e)	NA	K02867	RP-L11, MRPL11, rplK; large subunit ribosomal protein L11	132	03010 03011	Ribosome [PATH:ko03010], Ribosome [BR:ko03011],	09122 09182	09120 09180
D|1136176.5.peg.125	1	162204	162908	+	705	5946.5	6481.5	5315.5	4782	5525	5890.5	1371	1842.5	2542.5	1319	2353	2086.5	4006.84	4534.89	3751.69	3526.38	3653.12	3845.74	2076.26	2576.57	3341.75	2022.56	3330.67	3123.21	3315.81	0.50134	0.133644	3.75132	0.000176	0.000325	LSU ribosomal protein L1p (L10Ae)	NA	K02863	RP-L1, MRPL1, rplA; large subunit ribosomal protein L1	263	03010 03011	Ribosome [PATH:ko03010], Ribosome [BR:ko03011],	09122 09182	09120 09180
D|1136176.5.peg.126	1	163009	163134	-	126	2211	2161.5	1871	1735	2026	2122.5	498.5	823	831.5	551	809	807.5	1489.93	1512.1	1320.68	1279.44	1339.59	1385.51	754.179	1151.2	1092.44	844.906	1145.14	1208.26	1210.28	0.425972	0.110977	3.83838	0.000124	0.000232	hypothetical protein	NA			NA
D|1136176.5.peg.127	1	163153	163647	+	495	10195	10300.5	8834	8709	9758	10092.5	1977.5	2754	3393.5	1985	3036	2775.5	6870.12	7207.12	6235.64	6422.26	6451.97	6589.34	2994	3852.26	4460.49	3043.81	4297.46	4154.8	5214.94	0.802479	0.102388	7.83766	4.59e-15	1.84e-14	LSU ribosomal protein L10p (P0)	NA	K02864	RP-L10, MRPL10, rplJ; large subunit ribosomal protein L10	135	03010 03011	Ribosome [PATH:ko03010], Ribosome [BR:ko03011],	09122 09182	09120 09180
D|1136176.5.peg.128	1	163705	164070	+	366	19148	17736	16367	15663	18025	18522	5297	5283	6486	5215	6112	6314	12903.3	12410.2	11552.9	11550.3	11918.1	12093.5	8021.86	7389.79	8526.59	7996.7	8651.53	9453.48	10205.7	0.5335	0.0586973	9.089	1e-19	5.17e-19	LSU ribosomal protein L7/L12 (P1/P2)	NA	K02935	RP-L7, MRPL12, rplL; large subunit ribosomal protein L7/L12	78	03010 03011	Ribosome [PATH:ko03010], Ribosome [BR:ko03011],	09122 09182	09120 09180
D|1136176.5.peg.129	1	164305	168333	+	4029	63918	61549	53575	51598	58472	59788	12530	14875	18530	12793	16565	18015	43072.5	43067.1	37816.9	38049.8	38661.6	39037.2	18975.6	20807	24359.8	19616.8	23447.8	26972.5	31157	0.837077	0.0875588	9.56017	1.18e-21	6.61e-21	DNA-directed RNA polymerase beta subunit (EC 2.7.7.6)	KEGG_ENZYME:2.7.7.6	K03043	rpoB; DNA-directed RNA polymerase subunit beta [EC:2.7.7.6]	1191	03020 03021 03400	RNA polymerase [PATH:ko03020], Transcription machinery [BR:ko03021], DNA repair and recombination proteins [BR:ko03400],	09121 09182	09120 09180
D|1136176.5.peg.130	1	168420	172622	+	4203	95257	88371	79194	77977	84019	87431	17211	18940	21776	18063	19133	20971	64191	61835	55900.5	57502.4	55553.2	57086.1	26064.6	26493	28627	27697.9	27082.8	31398.3	43286	1.07287	0.0565521	18.9714	2.94e-80	9.17e-79	DNA-directed RNA polymerase beta' subunit (EC 2.7.7.6)	KEGG_ENZYME:2.7.7.6	K03046	rpoC; DNA-directed RNA polymerase subunit beta' [EC:2.7.7.6]	1188	03020 03021 03400	RNA polymerase [PATH:ko03020], Transcription machinery [BR:ko03021], DNA repair and recombination proteins [BR:ko03400],	09121 09182	09120 09180
D|1136176.5.peg.131	1	173011	173502	-	492	3692	3578	3804	3780	4194	3945	3761	4062	3793	2993	3461	3038	2487.93	2503.6	2685.12	2787.48	2773.07	2575.8	5695.72	5681.87	4986.33	4589.48	4899.04	4548.57	3851.17	-0.943101	0.0681224	-13.8442	1.38e-43	1.72e-42	Regulator of sigma D	NA	K07740	rsd; regulator of sigma D	104	99973	Transcription,	09192	09190
D|1136176.5.peg.132	1	173674	174483	+	810	934	834	923	839	981	921	463	470	510	456	468	426	629.396	583.567	651.516	618.702	648.635	601.346	701.174	657.43	670.453	699.232	662.454	637.818	646.81	-0.109324	0.0486683	-2.24632	0.0246838	0.0347429	NADH pyrophosphatase (EC 3.6.1.22)	KEGG_ENZYME:3.6.1.22	K03426	E3.6.1.22, NUDT12, nudC; NAD+ diphosphatase [EC:3.6.1.22]	116	00760 04146	Nicotinate and nicotinamide metabolism [PATH:ko00760], Peroxisome [PATH:ko04146],	09108 09141	09100 09140
D|1136176.5.peg.133	1	174783	175850	+	1068	2870	2820	2801	2558	2881	2872	1582	1578	1707	1571	1529	1523	1934.01	1973.21	1977.14	1886.34	1904.91	1875.21	2395.8	2207.29	2244.05	2408.98	2164.3	2280.27	2104.29	-0.245611	0.0359663	-6.82893	8.56e-12	2.76e-11	Uroporphyrinogen III decarboxylase (EC 4.1.1.37)	KEGG_ENZYME:4.1.1.37	K01599	hemE, UROD; uroporphyrinogen decarboxylase [EC:4.1.1.37]	434	00860	Porphyrin and chlorophyll metabolism [PATH:ko00860],	09108	09100
D|1136176.5.peg.134	1	175942	176535	-	594	85.5	87	88	64.5	107	86	51.5	53	63	46.5	49.5	46	57.2791	60.8757	62.1164	47.1954	70.7482	56.1517	77.2352	74.1357	82.8207	70.5366	69.3595	68.8724	66.4439	-0.32181	0.124325	-2.58845	0.00964082	0.0143438	Hypothetical protein VC0266 (sugar utilization related?)	NA			123
D|1136176.5.peg.135	1	176535	177461	-	927	1432.5	1286	1319	1310.5	1517	1419	595.5	635	579	538.5	595.5	527	964.984	899.841	931.04	966.03	1003.04	926.503	901.077	888.23	761.162	824.972	842.222	789.038	891.511	0.185697	0.0513195	3.61844	0.000296	0.000533	D-3-phosphoglycerate dehydrogenase (EC 1.1.1.95)	KEGG_ENZYME:1.1.1.95			136
D|1136176.5.peg.136	1	177533	178120	+	588	688	715	677	649	773	835	454	428	471	428	429	388	463.623	500.3	477.873	478.59	511.106	545.194	687.544	598.681	619.183	656.297	607.249	580.924	560.547	-0.331748	0.059591	-5.56708	2.59e-08	6.71e-08	D01200173: hypothetical protein	NA	K09891	K09891; uncharacterized protein	128	99997	Function unknown,	09194	09190
D|1136176.5.peg.137	1	178200	179357	-	1158	769	787	757	730	821	800	475	517	541	485	449	387	518.207	550.68	534.342	538.322	542.844	522.342	719.347	723.173	711.206	743.701	635.559	579.426	609.929	-0.359186	0.0606986	-5.91753	3.27e-09	9.02e-09	CBS-domain containing protein	NA			177
D|1136176.5.peg.138	1	179628	179900	+	273	693	645	653	573	616	631	207	184	160	169	196	175	466.993	451.32	460.932	422.546	407.298	411.997	313.484	257.377	210.338	259.145	277.438	262.014	350.074	0.733275	0.0813326	9.01576	1.96e-19	9.94e-19	DNA-binding protein HU-alpha	NA	K05787	hupA; DNA-binding protein HU-alpha	76	03032 03036 03400	DNA replication proteins [BR:ko03032], Chromosome and associated proteins [BR:ko03036], DNA repair and recombination proteins [BR:ko03400],	09182	09180
D|1136176.5.peg.139	1	179947	180645	+	699	844	811	945	846	947	954	455	451	490	406	417	461	568.747	567.473	667.045	623.864	626.155	622.892	689.059	630.853	644.161	622.562	590.263	690.221	628.608	-0.0725877	0.0597421	-1.21502	0.224359	0.266635	Peptidyl-prolyl cis-trans isomerase (EC 5.2.1.8)	KEGG_ENZYME:5.2.1.8			22
D|1136176.5.peg.140	1	180816	182105	-	1290	1212	1189	1094	1068	1175	1225	246	288	305	302	296	293	816.732	831.968	772.22	787.572	776.908	799.836	372.546	402.851	400.957	463.088	418.988	438.687	606.863	0.939597	0.0538542	17.447	3.62e-68	9e-67	Phosphoribosylamine--glycine ligase (EC 6.3.4.13)	KEGG_ENZYME:6.3.4.13	K01945	purD; phosphoribosylamine---glycine ligase [EC:6.3.4.13]	343	00230	Purine metabolism [PATH:ko00230],	09104	09100
D|1136176.5.peg.141	1	182191	183783	-	1593	379	399	370	359	380	405	145	146	182	111	169	144	255.397	279.189	261.171	264.736	251.255	264.435	219.59	204.223	239.26	170.208	239.219	215.6	238.69	0.287349	0.0763131	3.76539	0.000166	0.000307	IMP cyclohydrolase (EC 3.5.4.10) / Phosphoribosylaminoimidazolecarboxamide formyltransferase (EC 2.1.2.3)	KEGG_ENZYME:3.5.4.10,KEGG_ENZYME:2.1.2.3	K00602	purH; phosphoribosylaminoimidazolecarboxamide formyltransferase / IMP cyclohydrolase [EC:2.1.2.3 3.5.4.10]	459	00230 00670 01523 04147	Purine metabolism [PATH:ko00230], One carbon pool by folate [PATH:ko00670], Antifolate resistance [PATH:ko01523], Exosome [BR:ko04147],	09104 09108 09176 09183	09100 09160 09180
D|1136176.5.peg.142	1	184108	184548	+	441	740	680	750	722	778	763	225	284	236	250	238	215	498.665	475.81	529.401	532.423	514.412	498.183	340.743	397.256	310.249	383.351	336.889	321.904	428.274	0.545358	0.066142	8.24527	1.65e-16	7.1e-16	transcriptional regulator%2C MerR family	NA	K13638	zntR; MerR family transcriptional regulator, Zn(II)-responsive regulator of zntA	66	03000	Transcription factors [BR:ko03000],	09182	09180
D|1136176.5.peg.143	1	184637	184933	-	297	650.5	672.5	650	623.5	636	646	274.5	281	299	257	332.5	292.5	438.016	470.212	458.814	459.417	420.522	421.791	414.95	393.059	393.07	394.085	469.946	437.19	430.923	0.092538	0.0615617	1.50318	0.132794	0.166153	DNA-binding protein Fis	NA	K03557	fis; Fis family transcriptional regulator, factor for inversion stimulation protein	87	05111 03000 03036 03400	Biofilm formation - Vibrio cholerae [PATH:ko05111], Transcription factors [BR:ko03000], Chromosome and associated proteins [BR:ko03036], DNA repair and recombination proteins [BR:ko03400],	09145 09182	09140 09180
D|1136176.5.peg.144	1	184957	185934	-	978	1395.5	1473.5	1220	1130.5	1276	1386	417.5	498	570	398	567.5	509.5	940.05	1030.69	861.159	833.293	843.689	904.957	631.511	696.596	749.33	610.295	802.588	762.088	805.52	0.347524	0.0802411	4.331	1.48e-05	3.04e-05	tRNA dihydrouridine synthase B (EC 1.-.-.-)	KEGG_ENZYME:1.-.-.-	K05540	dusB; tRNA-dihydrouridine synthase B [EC:1.-.-.-]	245	03016	Transfer RNA biogenesis [BR:ko03016],	09182	09180
D|1136176.5.peg.145	1	186066	186953	-	888	256	280	220	202	239	266	65	72	80	79	98	70	172.511	195.922	155.291	148.96	158.026	173.679	98.437	100.713	105.169	121.139	138.719	104.806	139.448	0.587025	0.106173	5.52897	3.22e-08	8.27e-08	Ribosomal protein L11 methyltransferase (EC 2.1.1.-)	KEGG_ENZYME:2.1.1.-	K02687	prmA; ribosomal protein L11 methyltransferase [EC:2.1.1.-]	226	03009	Ribosome biogenesis [BR:ko03009],	09182	09180
D|1136176.5.peg.146	1	187142	188485	-	1344	966.5	1051.5	892	831.5	916	970	283.5	294.5	419	272.5	391	398.5	650.96	735.406	629.634	612.802	605.658	633.339	428.579	411.243	550.823	417.086	553.46	595.896	568.741	0.386592	0.101117	3.8232	0.000132	0.000246	Biotin carboxylase of acetyl-CoA carboxylase (EC 6.3.4.14)	KEGG_ENZYME:6.3.4.14	K01961	accC; acetyl-CoA carboxylase, biotin carboxylase subunit [EC:6.4.1.2 6.3.4.14]	395	00620 00640 00720 00061	Pyruvate metabolism [PATH:ko00620], Propanoate metabolism [PATH:ko00640], Carbon fixation pathways in prokaryotes [PATH:ko00720], Fatty acid biosynthesis [PATH:ko00061],	09101 09102 09103	09100
D|1136176.5.peg.147	1	188501	188956	-	456	356.5	370.5	315	314.5	362	365	103.5	101.5	141	93.5	140	123.5	239.898	258.897	222.348	231.552	239.354	238.318	155.985	141.278	185.361	142.607	198.17	184.159	203.16	0.503155	0.0869174	5.78889	7.09e-09	1.91e-08	Biotin carboxyl carrier protein of acetyl-CoA carboxylase	NA	K02160	accB, bccP; acetyl-CoA carboxylase biotin carboxyl carrier protein	94	00620 00640 00720 00061	Pyruvate metabolism [PATH:ko00620], Propanoate metabolism [PATH:ko00640], Carbon fixation pathways in prokaryotes [PATH:ko00720], Fatty acid biosynthesis [PATH:ko00061],	09101 09102 09103	09100
D|1136176.5.peg.148	1	189031	189480	-	450	209	193	184	205	221	221	82	95	112	101	92	93	140.839	135.046	129.88	151.173	146.125	144.297	124.182	132.885	147.237	154.874	130.226	139.242	139.667	0.0320462	0.0872139	0.367444	0.713288	0.753375	3-dehydroquinate dehydratase II (EC 4.2.1.10)	KEGG_ENZYME:4.2.1.10	K03786	aroQ, qutE; 3-dehydroquinate dehydratase II [EC:4.2.1.10]	135	00400	Phenylalanine, tyrosine and tryptophan biosynthesis [PATH:ko00400],	09105	09100
D|1136176.5.peg.149	1	189804	191753	-	1950	6611	6095	6452	6021	6808	6833	2859	4030	5050	2787	6463	3421	4454.96	4264.8	4554.26	4440.05	4501.44	4461.45	4329.71	5637.11	6638.8	4273.6	9148.37	5122.01	5152.21	-0.398004	0.159523	-2.49496	0.0125972	0.0185051	Acetyl-coenzyme A synthetase (EC 6.2.1.1)	KEGG_ENZYME:6.2.1.1	K01895	ACSS1_2, acs; acetyl-CoA synthetase [EC:6.2.1.1]	556	00010 00620 00630 00640 00720 00680 01004	Glycolysis / Gluconeogenesis [PATH:ko00010], Pyruvate metabolism [PATH:ko00620], Glyoxylate and dicarboxylate metabolism [PATH:ko00630], Propanoate metabolism [PATH:ko00640], Carbon fixation pathways in prokaryotes [PATH:ko00720], Methane metabolism [PATH:ko00680], Lipid biosynthesis proteins [BR:ko01004],	09101 09102 09181	09100 09180
D|1136176.5.peg.150	1	191972	192604	-	633	116.5	130.5	128	118	142.5	133	62.5	97.5	119	77	221.5	84.5	78.1691	90.9637	90.3511	87.0164	93.8901	86.8393	93.8937	135.682	156.439	118.072	312.825	125.767	122.492	-0.839991	0.230111	-3.65037	0.000262	0.000475	DNA polymerase III epsilon subunit (EC 2.7.7.7)	KEGG_ENZYME:2.7.7.7	K02342	dnaQ; DNA polymerase III subunit epsilon [EC:2.7.7.7]	104	03030 03430 03440 03032 03400	DNA replication [PATH:ko03030], Mismatch repair [PATH:ko03430], Homologous recombination [PATH:ko03440], DNA replication proteins [BR:ko03032], DNA repair and recombination proteins [BR:ko03400],	09124 09182	09120 09180
D|1136176.5.peg.151	1	192617	194443	-	1827	905.5	805.5	888	873	966.5	961	432.5	651.5	865	397	1192.5	527.5	609.854	563.275	626.811	643.774	638.717	627.463	654.227	910.611	1137.14	608.762	1687.28	789.038	791.412	-0.641892	0.20479	-3.1344	0.00172207	0.00280979	Predicted signal-transduction protein containing cAMP-binding and CBS domains	NA	K07182	K07182; CBS domain-containing protein	307	99995	Signaling proteins,	09193	09190
D|1136176.5.peg.152	1	194679	195875	+	1197	46	59	59	56	56	66	27	21	31	14	30	24	30.9981	41.2835	41.6462	41.2959	37.0271	43.0932	40.8892	29.3745	40.753	21.4677	42.465	35.9334	37.1856	0.151651	0.165181	0.918088	0.358573	0.406967	Probable 3-phenylpropionic acid transporter	NA	K05820	hcaT; MFS transporter, PPP family, 3-phenylpropionic acid transporter	174	02000	Transporters [BR:ko02000],	09183	09180
D|1136176.5.peg.153	1	195972	199424	+	3453	504	442	451	483	493	478	163	162	172	159	128	140	339.631	309.277	318.347	356.177	325.971	312.099	246.85	226.604	226.114	243.811	181.184	209.612	274.64	0.557026	0.0763957	7.29132	3.07e-13	1.08e-12	Sensor histidine kinase	NA			699
D|1136176.5.peg.154	1	199552	200937	-	1386	523	498.5	480.5	472	537	563	159	276	312	212	399	230	352.435	348.461	338.817	348.066	355.063	367.598	240.792	386.065	410.16	325.082	564.784	344.362	365.14	-0.107184	0.149601	-0.716468	0.473703	0.523056	Fumarate hydratase class II (EC 4.2.1.2)	KEGG_ENZYME:4.2.1.2	K01679	E4.2.1.2B, fumC, FH; fumarate hydratase, class II [EC:4.2.1.2]	306	00020 00620 00720 05200 05211 04934	Citrate cycle (TCA cycle) [PATH:ko00020], Pyruvate metabolism [PATH:ko00620], Carbon fixation pathways in prokaryotes [PATH:ko00720], Pathways in cancer [PATH:ko05200], Renal cell carcinoma [PATH:ko05211], Cushing syndrome [PATH:ko04934],	09101 09102 09161 09162 09167	09100 09160
D|1136176.5.peg.155	1	200950	201333	-	384	26	23.5	32.5	20	33	29	14	28	30	9	64	22	17.5207	16.0936	22.5878	14.7485	21.8195	18.9349	21.2018	39.166	39.4384	13.8006	90.592	32.939	29.0702	-1.0902	0.330937	-3.29429	0.000987	0.00167289	D01201067: hypothetical protein	NA			9
D|1136176.5.peg.156	1	201542	203245	-	1704	1225.5	1146	1144	1150	1181.5	1324	879	3298	5828.5	577.5	10969.5	2429	825.492	801.88	807.513	848.042	780.875	864.475	1331.17	4613.2	7661.57	884.774	15526.6	3636.76	3215.2	-2.77165	0.571686	-4.8482	1.25e-06	2.82e-06	Acetate permease ActP (cation/acetate symporter)	NA	K14393	actP; cation/acetate symporter	568	02000	Transporters [BR:ko02000],	09183	09180
D|1136176.5.peg.157	1	203256	203522	-	267	166.5	138	143	146	139.5	159	113	346	480.5	96.5	1043.5	211	111.863	96.5614	100.939	107.664	91.9066	103.815	171.129	483.98	631.015	147.207	1476.37	315.915	319.863	-2.39647	0.501015	-4.78323	1.73e-06	3.84e-06	D152265: Sodium:solute symporter associated protein	NA			73
D|1136176.5.peg.158	1	203936	205687	+	1752	954	944	891.5	823	922.5	1027.5	492.5	535	627	402	650	592.5	642.873	660.536	628.929	606.903	609.625	670.556	745.092	748.351	824.263	616.429	920.075	886.358	713.332	-0.312293	0.0854822	-3.6533	0.000259	0.00047	K+/H+ antiporter	NA	K11105	cvrA, nhaP2; potassium/hydrogen antiporter	332	02000	Transporters [BR:ko02000],	09183	09180
D|1136176.5.peg.159	1	205684	206313	-	630	1571	1585	1567.5	1530	1704.5	1669.5	960.5	1218	1318	930	1201	901.5	1058.65	1109.06	1106.1	1128.26	1126.68	1089.74	1453.84	1703.72	1732.66	1426.07	1700.01	1349	1331.98	-0.501808	0.0677329	-7.40863	1.28e-13	4.6e-13	Transcriptional regulator%2C LuxR family	NA			139
D|1136176.5.peg.160	1	206566	208416	-	1851	866	862	836	771	912	921	361	396	472	292	411	388	583.573	603.159	590.106	568.557	603.013	601.346	546.704	553.92	620.498	447.754	581.77	580.924	573.444	0.0896417	0.0648636	1.382	0.16697	0.204182	Cytochrome c-type biogenesis protein DsbD%2C protein-disulfide reductase (EC 1.8.1.8)	KEGG_ENZYME:1.8.1.8	K04084	dsbD, dipZ; thioredoxin:protein disulfide reductase [EC:1.8.4.16]	290	03110	Chaperones and folding catalysts [BR:ko03110],	09182	09180
D|1136176.5.peg.161	1	208591	209079	-	489	501	486	468	457	532	478	311	304	308	314	352	251	337.61	340.064	330.346	337.004	351.757	312.099	470.983	425.231	404.901	481.489	498.256	375.804	388.795	-0.402412	0.0716175	-5.61891	1.92e-08	5.03e-08	Arginine pathway regulatory protein ArgR%2C repressor of arg regulon	NA	K03402	argR, ahrC; transcriptional regulator of arginine metabolism	42	03000	Transcription factors [BR:ko03000],	09182	09180
D|1136176.5.peg.162	1	209176	209349	+	174	76	71	71	73	78	76	1	5	7	7	5	9	51.2142	49.6802	50.1166	53.8322	51.5735	49.6225	1.51442	6.99394	9.2023	10.7338	7.0775	13.475	29.5863	2.64199	0.26591	9.93564	2.91e-23	1.72e-22	hypothetical protein	NA			NA
D|1136176.5.peg.163	1	209407	209871	-	465	72.5	61.5	62.5	68.5	53	72.5	19	21	26	20.5	23.5	12	48.5187	42.683	43.7638	50.1451	35.0435	47.0107	28.7739	29.3745	34.18	30.6681	32.5565	17.9667	36.7237	0.614722	0.170573	3.60385	0.000314	0.000562	Aspartate carbamoyltransferase regulatory chain (PyrI)	NA	K00610	pyrI; aspartate carbamoyltransferase regulatory subunit	107	00240 00250	Pyrimidine metabolism [PATH:ko00240], Alanine, aspartate and glutamate metabolism [PATH:ko00250],	09104 09105	09100
D|1136176.5.peg.164	1	209887	210816	-	930	116.5	120.5	116.5	112.5	109	123.5	35	44	45	41.5	43.5	40	78.1691	83.9665	81.8807	82.5919	72.0706	80.31	53.0045	61.5466	59.1576	62.8696	60.8665	59.889	69.6936	0.420904	0.119205	3.53094	0.000414	0.000732	Aspartate carbamoyltransferase (EC 2.1.3.2)	KEGG_ENZYME:2.1.3.2	K00609	pyrB, PYR2; aspartate carbamoyltransferase catalytic subunit [EC:2.1.3.2]	257	00240 00250	Pyrimidine metabolism [PATH:ko00240], Alanine, aspartate and glutamate metabolism [PATH:ko00250],	09104 09105	09100
D|1136176.5.peg.165	1	211314	212324	-	1011	290	281	257	281	293	295	108	109	83	97	97	103	195.423	196.621	181.408	207.217	193.731	192.613	163.557	152.468	109.113	148.74	137.303	154.214	169.367	0.436612	0.0873545	4.99816	5.79e-07	1.36e-06	Ornithine carbamoyltransferase (EC 2.1.3.3)	KEGG_ENZYME:2.1.3.3	K00611	OTC, argF, argI; ornithine carbamoyltransferase [EC:2.1.3.3]	293	00220	Arginine biosynthesis [PATH:ko00220],	09105	09100
D|1136176.5.peg.166	1	212503	213414	-	912	106	117	101	91	115	118	50	46	36	57	59	51	71.4304	81.8673	71.2927	67.1059	76.0378	77.0454	75.7208	64.3442	47.3261	87.4041	83.5145	76.3585	73.2873	0.0427711	0.125873	0.339797	0.734009	0.770082	Carbamate kinase (EC 2.7.2.2)	KEGG_ENZYME:2.7.2.2	K00926	arcC; carbamate kinase [EC:2.7.2.2]	216	00910 00230 00220	Nitrogen metabolism [PATH:ko00910], Purine metabolism [PATH:ko00230], Arginine biosynthesis [PATH:ko00220],	09102 09104 09105	09100
D|1136176.5.peg.167	1	213488	214711	-	1224	266	253	232	243	262	235	116	143	133	142	144	132	179.25	177.029	163.761	179.195	173.234	153.438	175.672	200.027	174.844	217.743	203.832	197.634	182.972	-0.188394	0.0805503	-2.33884	0.0193438	0.0276544	Arginine deiminase (EC 3.5.3.6)	KEGG_ENZYME:3.5.3.6	K01478	arcA; arginine deiminase [EC:3.5.3.6]	424	00220	Arginine biosynthesis [PATH:ko00220],	09105	09100
D|1136176.5.peg.168	1	215519	216967	-	1449	4511	4780	4769	4253	5184	4835	1271	1203	1260	1160	1225	1011	3039.83	3344.66	3366.29	3136.28	3427.65	3156.9	1924.82	1682.74	1656.41	1778.75	1733.99	1513.7	2480.17	0.920372	0.0573732	16.0418	6.52e-58	1.24e-56	Arginine/ornithine antiporter ArcD	NA			420
D|1136176.5.peg.169	1	217512	218819	-	1308	1356	1484	1440	1288	1496	1534	533	521	706	575	645	594	913.77	1038.39	1016.45	949.807	989.153	1001.59	807.183	728.768	928.118	881.708	912.997	889.352	921.44	0.198661	0.0625959	3.17371	0.00150505	0.00247834	C4-dicarboxylate transporter DcuA	NA	K07791	dcuA; anaerobic C4-dicarboxylate transporter DcuA	304	02000	Transporters [BR:ko02000],	09183	09180
D|1136176.5.peg.170	1	219000	220451	-	1452	2912	2976	2629	2589	2980	2816	941	1177	1191	937	1279	990	1962.31	2082.37	1855.73	1909.2	1970.37	1838.64	1425.06	1646.37	1565.71	1436.8	1810.42	1482.25	1748.77	0.310233	0.0631955	4.9091	9.15e-07	2.1e-06	Aspartate ammonia-lyase (EC 4.3.1.1)	KEGG_ENZYME:4.3.1.1	K01744	aspA; aspartate ammonia-lyase [EC:4.3.1.1]	386	00250	Alanine, aspartate and glutamate metabolism [PATH:ko00250],	09105	09100
D|1136176.5.peg.171	1	220736	221260	+	525	580	552	600	614	603	618	361	332	336	327	318	287	390.845	386.246	423.521	452.78	398.703	403.509	546.704	464.397	441.71	501.423	450.129	429.704	440.806	-0.205953	0.0691313	-2.97916	0.00289039	0.00459335	FxsA protein	NA	K07113	fxsA; UPF0716 protein FxsA	90	99996	General function prediction only,	09194	09190
D|1136176.5.peg.172	1	221445	221924	-	480	49	71	70	54	77	63	42	33	38	43	38	36	33.0197	49.6802	49.4108	39.8211	50.9123	41.1344	63.6054	46.16	49.9553	65.9364	53.789	53.9001	49.7771	-0.331187	0.147632	-2.24332	0.024876	0.0350029	tRNA (cytidine(34)-2'-O)-methyltransferase (EC 2.1.1.207)	KEGG_ENZYME:2.1.1.207	K03216	trmL, cspR; tRNA (cytidine/uridine-2'-O-)-methyltransferase [EC:2.1.1.207]	139	03016	Transfer RNA biogenesis [BR:ko03016],	09182	09180
D|1136176.5.peg.173	1	222008	222625	-	618	83	84	85	70	74	82	24	33	29	21	34	24	55.9313	58.7765	59.9988	51.6199	48.9287	53.54	36.346	46.16	38.1238	32.2015	48.127	35.9334	47.1406	0.467227	0.145907	3.20222	0.00136372	0.0022649	Manganese superoxide dismutase	NA	K04564	SOD2; superoxide dismutase, Fe-Mn family [EC:1.15.1.1]	160	04013 04068 04146 04211 04212 04213 05016	MAPK signaling pathway - fly [PATH:ko04013], FoxO signaling pathway [PATH:ko04068], Peroxisome [PATH:ko04146], Longevity regulating pathway [PATH:ko04211], Longevity regulating pathway - worm [PATH:ko04212], Longevity regulating pathway - multiple species [PATH:ko04213], Huntington disease [PATH:ko05016],	09132 09141 09149 09164	09130 09140 09150 09160
D|1136176.5.peg.174	1	222702	224084	-	1383	828	750	841	748	827	770	302.5	337	359	323.5	375	298	557.965	524.79	593.635	551.596	546.811	502.754	457.353	471.391	471.947	495.29	530.812	446.173	512.543	0.189327	0.0602282	3.14349	0.00166943	0.00273159	Copper sensory histidine kinase CpxA	NA	K07640	cpxA; two-component system, OmpR family, sensor histidine kinase CpxA [EC:2.7.13.3]	219	02020 01503 01001 02022	Two-component system [PATH:ko02020], Cationic antimicrobial peptide (CAMP) resistance [PATH:ko01503], Protein kinases [BR:ko01001], Two-component system [BR:ko02022],	09132 09175 09181 09183	09130 09160 09180
D|1136176.5.peg.175	1	224084	224773	-	690	957	959	943	852	987	924	481.5	551	481	564.5	562	493	644.895	671.032	665.634	628.288	652.603	603.305	728.434	770.732	632.329	864.84	795.511	738.132	699.645	-0.227572	0.0675064	-3.37112	0.000749	0.00128757	Copper-sensing two-component system response regulator CpxR	NA	K07662	cpxR; two-component system, OmpR family, response regulator CpxR	145	02020 01503 02022	Two-component system [PATH:ko02020], Cationic antimicrobial peptide (CAMP) resistance [PATH:ko01503], Two-component system [BR:ko02022],	09132 09175 09183	09130 09160 09180
D|1136176.5.peg.176	1	224952	225461	+	510	1988	1781	1932	2135	2067	2096	451	478	495	549	521	498	1339.66	1246.2	1363.74	1574.41	1366.7	1368.54	683.001	668.62	650.734	841.839	737.475	745.618	1048.88	0.933481	0.0740344	12.6088	1.89e-36	1.85e-35	P pilus assembly/Cpx signaling pathway%2C periplasmic inhibitor/zinc-resistance associated protein	NA	K06006	cpxP, spy; periplasmic protein CpxP/Spy	28	03110	Chaperones and folding catalysts [BR:ko03110],	09182	09180
D|1136176.5.peg.177	1	225625	226533	+	909	1320	1249	1209	1161	1296	1295	584	649	697	662	543	580	889.51	873.951	853.395	856.153	856.913	845.54	884.418	907.813	916.286	1015.11	768.616	868.391	878.008	-0.0501981	0.0562635	-0.892198	0.372287	0.420571	Cobalt-zinc-cadmium resistance protein	NA	K13283	fieF; ferrous-iron efflux pump FieF	190	02000	Transporters [BR:ko02000],	09183	09180
D|1136176.5.peg.178	1	226849	227811	+	963	2753	2740	2602	2487	2838	2960	1338	1321	1614	1335	1425	1409	1855.17	1917.23	1836.67	1833.98	1876.48	1932.66	2026.29	1847.8	2121.79	2047.09	2017.09	2109.59	1951.82	-0.112891	0.0383203	-2.94599	0.00321922	0.00507768	6-phosphofructokinase (EC 2.7.1.11)	KEGG_ENZYME:2.7.1.11	K00850	pfkA, PFK; 6-phosphofructokinase 1 [EC:2.7.1.11]	257	00010 00030 00051 00052 00680 03018 04066 04152 04922 04919 05230 01009 03019	Glycolysis / Gluconeogenesis [PATH:ko00010], Pentose phosphate pathway [PATH:ko00030], Fructose and mannose metabolism [PATH:ko00051], Galactose metabolism [PATH:ko00052], Methane metabolism [PATH:ko00680], RNA degradation [PATH:ko03018], HIF-1 signaling pathway [PATH:ko04066], AMPK signaling pathway [PATH:ko04152], Glucagon signaling pathway [PATH:ko04922], Thyroid hormone signaling pathway [PAT…	09101 09102 09123 09132 09152 09161 09181 09182	09100 09120 09130 09150 09160 09180
D|1136176.5.peg.179	1	227961	228731	-	771	2411	2465	2367	2218	2562	2546	1427	1407	1636	1356	1508	1327	1624.7	1724.81	1670.79	1635.61	1693.99	1662.35	2161.07	1968.09	2150.71	2079.3	2134.57	1986.82	1874.4	-0.318026	0.0354479	-8.97164	2.92e-19	1.47e-18	Triosephosphate isomerase (EC 5.3.1.1)	KEGG_ENZYME:5.3.1.1	K01803	TPI, tpiA; triosephosphate isomerase (TIM) [EC:5.3.1.1]	240	00010 00051 00562 00710 04147	Glycolysis / Gluconeogenesis [PATH:ko00010], Fructose and mannose metabolism [PATH:ko00051], Inositol phosphate metabolism [PATH:ko00562], Carbon fixation in photosynthetic organisms [PATH:ko00710], Exosome [BR:ko04147],	09101 09102 09183	09100 09180
D|1136176.5.peg.180	1	228982	229329	+	348	166	157	159	133	171	152	51	51	61	63	59	74	111.863	109.856	112.233	98.0778	113.065	99.2449	77.2352	71.3382	80.1915	96.6045	83.5145	110.795	97.0015	0.315199	0.109034	2.89084	0.00384211	0.00600508	5-carboxymethyl-2-hydroxymuconate delta-isomerase (EC 5.3.3.10)	KEGG_ENZYME:5.3.3.10	K01826	hpaF, hpcD; 5-carboxymethyl-2-hydroxymuconate isomerase [EC:5.3.3.10]	38	00350	Tyrosine metabolism [PATH:ko00350],	09105	09100
D|1136176.5.peg.181	1	229415	229837	+	423	437	469	440	376	440	505	195	220	274	253	238	230	294.482	328.169	310.582	277.273	290.927	329.728	295.311	307.733	360.204	387.951	336.889	344.362	321.968	-0.149966	0.0764383	-1.96192	0.0497721	0.066698	D028593: membrane protein	NA			35
D|1136176.5.peg.182	1	229942	230289	-	348	1207	1181	1178	1196	1200	1225	382	406	464	437	411	468	813.363	826.37	831.513	881.963	793.438	799.836	578.507	567.908	609.981	670.098	581.77	700.702	721.287	0.416146	0.0586802	7.09176	1.32e-12	4.49e-12	D01201392: hypothetical protein	NA			19
D|1136176.5.peg.183	1	230462	231088	-	627	661	611	694	611	695	710	304	243	283	323	234	265	445.429	427.529	489.872	450.568	459.533	463.578	460.382	339.905	372.036	495.29	331.227	396.765	427.676	0.194275	0.0934838	2.07817	0.0376941	0.051509	Predicted transcriptional regulator	NA			115
D|1136176.5.peg.184	1	231268	232275	-	1008	450	452	481	459	477	511	283	299	271	283	255	281	303.242	316.274	339.523	338.479	315.392	333.646	428.579	418.237	356.26	433.953	360.952	420.72	363.772	-0.311192	0.0664487	-4.68319	2.82e-06	6.17e-06	Fructose-1%2C6-bisphosphatase%2C GlpX type (EC 3.1.3.11)	KEGG_ENZYME:3.1.3.11	K02446	glpX; fructose-1,6-bisphosphatase II [EC:3.1.3.11]	389	00010 00030 00051 00710 00680	Glycolysis / Gluconeogenesis [PATH:ko00010], Pentose phosphate pathway [PATH:ko00030], Fructose and mannose metabolism [PATH:ko00051], Carbon fixation in photosynthetic organisms [PATH:ko00710], Methane metabolism [PATH:ko00680],	09101 09102	09100
D|1136176.5.peg.185	1	232600	232842	+	243	7	8	8	3	6	8	1	0	6	6	1	6	4.7171	5.59777	5.64695	2.21228	3.96719	5.22342	1.51442	0	7.88769	9.20043	1.4155	8.98335	4.69717	-0.0722796	0.460654	-0.156907	0.875318	0.894393	D074102: hypothetical protein	NA	K09892	zapB; cell division protein ZapB	43	03036	Chromosome and associated proteins [BR:ko03036],	09182	09180
D|1136176.5.peg.186	1	232949	233467	-	519	721	627	678	698	738	737	347	318	403	365	416	426	485.861	438.725	478.579	514.724	487.964	481.207	525.502	444.814	529.79	559.693	588.848	637.818	514.46	-0.186162	0.0773442	-2.40693	0.0160874	0.0233004	Ribonuclease E inhibitor RraA	NA	K02553	rraA, menG; regulator of ribonuclease activity A	156	03019	Messenger RNA biogenesis [BR:ko03019],	09182	09180
D|1136176.5.peg.187	1	233541	234458	-	918	559	498	529	478	534	551	170	210	230	192	213	186	376.694	348.461	373.404	352.49	353.08	359.763	257.451	293.745	302.361	294.414	301.501	278.484	324.321	0.322771	0.0613732	5.25916	1.45e-07	3.55e-07	1%2C4-dihydroxy-2-naphthoate polyprenyltransferase (EC 2.5.1.74)	KEGG_ENZYME:2.5.1.74	K02548	menA; 1,4-dihydroxy-2-naphthoate polyprenyltransferase [EC:2.5.1.74]	151	00130 01006	Ubiquinone and other terpenoid-quinone biosynthesis [PATH:ko00130], Prenyltransferases [BR:ko01006],	09108 09181	09100 09180
D|1136176.5.peg.188	1	234614	235954	-	1341	3421	2977	2968	3224	3190	3112	573	579	603	655	515	574	2305.31	2083.07	2095.02	2377.47	2109.22	2031.91	867.76	809.898	792.712	1004.38	728.982	859.407	1505.43	1.36165	0.0739163	18.4216	8.82e-76	2.54e-74	ATP-dependent hsl protease ATP-binding subunit HslU	NA	K03667	hslU; ATP-dependent HslUV protease ATP-binding subunit HslU	362	03110	Chaperones and folding catalysts [BR:ko03110],	09182	09180
D|1136176.5.peg.189	1	236013	236561	-	549	482	462	427	453	455	469	110	129	145	108	140	145	324.806	323.271	301.406	334.055	300.845	306.223	166.586	180.444	190.619	165.608	198.17	217.098	250.761	0.755259	0.0749327	10.0792	6.83e-24	4.17e-23	ATP-dependent protease HslV (EC 3.4.25.-)	KEGG_ENZYME:3.4.25.-	K01419	hslV, clpQ; ATP-dependent HslUV protease, peptidase subunit HslV [EC:3.4.25.2]	173	01002	Peptidases and inhibitors [BR:ko01002],	09181	09180
D|1136176.5.peg.190	1	236768	237307	-	540	115	110	104	106	111	106	63	74	68	56	96	67	77.4952	76.9693	73.4103	78.1673	73.393	69.2103	95.4082	103.51	89.3938	85.8707	135.888	100.314	88.2525	-0.446512	0.112521	-3.96826	7.24e-05	0.000139	Cell division protein FtsN	NA	K03591	ftsN; cell division protein FtsN	58	03036	Chromosome and associated proteins [BR:ko03036],	09182	09180
D|1136176.5.peg.191	1	237430	238434	-	1005	954	1029	1042	910	1071	1099	658	711	848	542	749	648	642.873	720.013	735.515	671.059	708.143	717.567	996.485	994.538	1114.79	831.105	1060.21	970.202	846.875	-0.509493	0.0677687	-7.51812	5.56e-14	2.05e-13	Transcriptional (co)regulator CytR	NA	K05499	cytR; LacI family transcriptional regulator, repressor for deo operon, udp, cdd, tsx, nupC, and nupG	261	03000	Transcription factors [BR:ko03000],	09182	09180
D|1136176.5.peg.192	1	238675	240876	-	2202	687	710	700	647	707	719	387	362	447	348	385	363	462.95	496.802	494.108	477.116	467.467	469.455	586.079	506.361	587.633	533.625	544.967	543.493	514.171	-0.204219	0.052022	-3.92563	8.65e-05	0.000164	Helicase PriA essential for oriC/DnaA-independent DNA replication	NA	K04066	priA; primosomal protein N' (replication factor Y) (superfamily II helicase) [EC:3.6.4.-]	459	03440 03400	Homologous recombination [PATH:ko03440], DNA repair and recombination proteins [BR:ko03400],	09124 09182	09120 09180
D|1136176.5.peg.193	1	241208	241426	+	219	344	435	337	289	329	361	45	60	170	74	118	158	231.812	304.378	237.878	213.117	217.534	235.707	68.1487	83.9272	223.484	113.472	167.029	236.562	194.421	0.689076	0.254686	2.70559	0.00681837	0.0103502	LSU ribosomal protein L31p	NA	K02909	RP-L31, rpmE; large subunit ribosomal protein L31	62	03010 03011	Ribosome [PATH:ko03010], Ribosome [BR:ko03011],	09122 09182	09120 09180
D|1136176.5.peg.194	1	241758	243047	+	1290	1812	1703	1675	1647	1819	1801	639	652	779	632	653	754	1221.05	1191.62	1182.33	1214.54	1202.72	1175.92	967.711	912.009	1024.08	969.112	924.321	1128.91	1092.86	0.278786	0.050102	5.56437	2.63e-08	6.81e-08	NADP-dependent malic enzyme (EC 1.1.1.40)	KEGG_ENZYME:1.1.1.40	K00029	E1.1.1.40, maeB; malate dehydrogenase (oxaloacetate-decarboxylating)(NADP+) [EC:1.1.1.40]	321	00620 00710 03320	Pyruvate metabolism [PATH:ko00620], Carbon fixation in photosynthetic organisms [PATH:ko00710], PPAR signaling pathway [PATH:ko03320],	09101 09102 09152	09100 09150
D|1136176.5.peg.195	1	243272	243592	-	321	175	205	197	175	204	196	156	147	168	134	153	135	117.927	143.443	139.056	129.05	134.884	127.974	236.249	205.622	220.855	205.476	216.571	202.125	173.269	-0.700586	0.0799888	-8.75855	1.98e-18	9.53e-18	Methionine repressor MetJ	NA	K03764	metJ; MetJ family transcriptional regulator, methionine regulon repressor	88	03000	Transcription factors [BR:ko03000],	09182	09180
D|1136176.5.peg.196	1	243801	244982	+	1182	603.5	559	550.5	514.5	584.5	593.5	560.5	563.5	511.5	472	526.5	518	406.344	391.144	388.227	379.038	386.14	387.186	848.072	787.517	671.768	723.767	744.553	775.563	574.11	-0.959488	0.0579275	-16.5636	1.28e-61	2.58e-60	Cystathionine gamma-synthase (EC 2.5.1.48)	KEGG_ENZYME:2.5.1.48	K01739	metB; cystathionine gamma-synthase [EC:2.5.1.48]	248	00920 00270 00450	Sulfur metabolism [PATH:ko00920], Cysteine and methionine metabolism [PATH:ko00270], Selenocompound metabolism [PATH:ko00450],	09102 09105 09106	09100
D|1136176.5.peg.197	1	244985	247396	+	2412	972.5	966	952.5	946.5	1035.5	1051.5	879.5	952.5	988.5	708	793.5	763	655.003	675.93	671.986	697.606	684.34	686.226	1331.17	1331.65	1298.84	1085.65	1122.49	1142.38	948.606	-0.845578	0.0608486	-13.8964	6.66e-44	8.4e-43	Aspartokinase (EC 2.7.2.4) / Homoserine dehydrogenase (EC 1.1.1.3)	KEGG_ENZYME:2.7.2.4,KEGG_ENZYME:1.1.1.3	K12525	metL; bifunctional aspartokinase / homoserine dehydrogenase 2 [EC:2.7.2.4 1.1.1.3]	502	00260 00270 00300 00261	Glycine, serine and threonine metabolism [PATH:ko00260], Cysteine and methionine metabolism [PATH:ko00270], Lysine biosynthesis [PATH:ko00300], Monobactam biosynthesis [PATH:ko00261],	09105 09110	09100
D|1136176.5.peg.198	1	247651	248535	+	885	96	110	104	109	126	113	211	195	165	202	159	146	64.6916	76.9693	73.4103	80.3796	83.311	73.7808	319.542	272.764	216.911	309.748	225.064	218.595	167.931	-1.78597	0.12132	-14.7211	4.72e-49	6.93e-48	5%2C10-methylenetetrahydrofolate reductase (EC 1.5.1.20)	KEGG_ENZYME:1.5.1.20	K00297	metF, MTHFR; methylenetetrahydrofolate reductase (NADPH) [EC:1.5.1.20]	331	00720 00670 01523	Carbon fixation pathways in prokaryotes [PATH:ko00720], One carbon pool by folate [PATH:ko00670], Antifolate resistance [PATH:ko01523],	09102 09108 09176	09100 09160
D|1136176.5.peg.199	1	248665	249204	-	540	3679	3573	4026	3424	4208	4136	3405	3191	3140	3344	2442	2477	2479.17	2500.1	2841.83	2524.95	2782.32	2700.51	5156.58	4463.53	4127.89	5127.7	3456.65	3708.63	3489.16	-0.718083	0.100136	-7.17109	7.44e-13	2.57e-12	Transcriptional regulator%2C PadR family	NA			38
D|1136176.5.peg.200	1	249578	252208	-	2631	1580	1529	1536	1396	1674	1557	1354	1375	1373	1102	1216	1226	1064.72	1069.87	1084.21	1029.45	1106.85	1016.61	2050.52	1923.33	1804.97	1689.81	1721.25	1835.6	1449.76	-0.790948	0.051597	-15.3293	4.87e-53	8.1e-52	Phosphoenolpyruvate carboxylase (EC 4.1.1.31)	KEGG_ENZYME:4.1.1.31	K01595	ppc; phosphoenolpyruvate carboxylase [EC:4.1.1.31]	813	00620 00710 00720 00680	Pyruvate metabolism [PATH:ko00620], Carbon fixation in photosynthetic organisms [PATH:ko00710], Carbon fixation pathways in prokaryotes [PATH:ko00720], Methane metabolism [PATH:ko00680],	09101 09102	09100
D|1136176.5.peg.201	1	252468	253604	-	1137	349	322	356	329	364	379	162	169	174	144	159	133	235.181	225.31	251.289	242.614	240.676	247.459	245.335	236.395	228.743	220.81	225.064	199.131	233.167	0.0891252	0.0698783	1.27543	0.202155	0.242796	Acetylornithine deacetylase (EC 3.5.1.16)	KEGG_ENZYME:3.5.1.16	K01438	argE; acetylornithine deacetylase [EC:3.5.1.16]	252	00220	Arginine biosynthesis [PATH:ko00220],	09105	09100
D|1136176.5.peg.202	1	253758	254762	+	1005	115	91.5	89	86	99.5	109.5	53	50	56.5	38	79.5	57.5	77.4952	63.6746	62.8223	63.4188	65.4586	71.169	80.264	69.9394	73.6184	58.2694	111.824	85.3419	73.608	-0.246455	0.132282	-1.8631	0.0624481	0.0822833	N-acetyl-gamma-glutamyl-phosphate reductase (EC 1.2.1.38)	KEGG_ENZYME:1.2.1.38	K00145	argC; N-acetyl-gamma-glutamyl-phosphate reductase [EC:1.2.1.38]	240	00220	Arginine biosynthesis [PATH:ko00220],	09105	09100
D|1136176.5.peg.203	1	254775	255563	+	789	124	127.5	133	123	122.5	152.5	110	118	132.5	81	137.5	101.5	83.56	88.8645	93.8805	90.7036	80.6662	99.2449	166.586	165.057	173.529	124.206	193.923	151.22	125.953	-0.863683	0.10336	-8.35607	6.48e-17	2.88e-16	Acetylglutamate kinase (EC 2.7.2.8)	KEGG_ENZYME:2.7.2.8	K00930	argB; acetylglutamate kinase [EC:2.7.2.8]	197	00220	Arginine biosynthesis [PATH:ko00220],	09105	09100
D|1136176.5.peg.204	1	255684	256895	+	1212	262	253	243	257	267	238	120	158	199	148	233	154	176.554	177.029	171.526	189.519	176.54	155.397	181.73	221.008	261.608	226.944	329.811	230.573	208.187	-0.474652	0.116648	-4.0691	4.72e-05	9.19e-05	Argininosuccinate synthase (EC 6.3.4.5)	KEGG_ENZYME:6.3.4.5	K01940	argG, ASS1; argininosuccinate synthase [EC:6.3.4.5]	368	00250 00220 05418 04147	Alanine, aspartate and glutamate metabolism [PATH:ko00250], Arginine biosynthesis [PATH:ko00220], Fluid shear stress and atherosclerosis [PATH:ko05418], Exosome [BR:ko04147],	09105 09166 09183	09100 09160 09180
D|1136176.5.peg.205	1	257241	259115	+	1875	1217	1154	1121	1058	1209	1225	634	601	633	498	625	583	820.101	807.478	791.278	780.198	799.389	799.836	960.139	840.671	832.151	763.635	884.687	872.883	829.371	-0.102818	0.0499963	-2.05651	0.0397338	0.0541052	Argininosuccinate lyase (EC 4.3.2.1) / N-acetylglutamate synthase (EC 2.3.1.1)	KEGG_ENZYME:4.3.2.1,KEGG_ENZYME:2.3.1.1	K14681	argHA; argininosuccinate lyase / amino-acid N-acetyltransferase [EC:4.3.2.1 2.3.1.1]	491	00250 00220	Alanine, aspartate and glutamate metabolism [PATH:ko00250], Arginine biosynthesis [PATH:ko00220],	09105	09100
D|1136176.5.peg.206	1	259382	259564	-	183	119	112	114	95	115	117	69	96	76	84	84	76	80.1907	78.3687	80.469	70.0556	76.0378	76.3925	104.495	134.284	99.9107	128.806	118.902	113.789	96.8084	-0.599031	0.102308	-5.8552	4.76e-09	1.3e-08	D01199674: hypothetical protein	NA			9
D|1136176.5.peg.207	1	259718	260065	+	348	127	128	115	122	120	108	54	84	105	78	95	81	85.5817	89.5642	81.1748	89.9661	79.3438	70.5161	81.7784	117.498	138.035	119.606	134.472	121.275	100.734	-0.528575	0.115348	-4.58243	4.6e-06	9.88e-06	Translation initiation inhibitor	NA			117
D|1136176.5.peg.208	1	260302	261768	-	1467	5533	5512	5515	5019	5816	5705	2504	2940	3016	2659	2807	2808	3728.53	3856.86	3892.86	3701.15	3845.53	3724.95	3792.1	4112.43	3964.88	4077.32	3973.31	4204.21	3906.18	-0.0845907	0.0310107	-2.72779	0.00637603	0.00973923	Dihydrolipoamide dehydrogenase (EC 1.8.1.4)	KEGG_ENZYME:1.8.1.4	K00382	DLD, lpd, pdhD; dihydrolipoamide dehydrogenase [EC:1.8.1.4]	398	00010 00020 00620 00630 00640 00260 00280 00310 00380 04147	Glycolysis / Gluconeogenesis [PATH:ko00010], Citrate cycle (TCA cycle) [PATH:ko00020], Pyruvate metabolism [PATH:ko00620], Glyoxylate and dicarboxylate metabolism [PATH:ko00630], Propanoate metabolism [PATH:ko00640], Glycine, serine and threonine metabolism [PATH:ko00260], Valine, leucine and isoleucine degradation [PATH:ko00280], Lysine degradation [PATH:ko00310], Tryptophan metabolism [PATH:ko0…	09101 09105 09183	09100 09180
D|1136176.5.peg.209	1	262076	262804	-	729	3448	3626	3332	3185	3584	3495	1335	1187	1440	1229	1398	1373	2323.51	2537.19	2351.95	2348.71	2369.73	2281.98	2021.74	1660.36	1893.04	1884.55	1978.87	2055.69	2142.28	0.306635	0.0530463	5.78052	7.45e-09	2.01e-08	Peroxiredoxin family protein/glutaredoxin	NA	K24136	pgdX; glutathione-dependent peroxiredoxin [EC:1.11.1.27]	208	00480	Glutathione metabolism [PATH:ko00480],	09106	09100
D|1136176.5.peg.210	1	263026	263919	+	894	817	749	748	739	835	812	660	682	630	595	627	578	550.553	524.091	527.989	544.959	552.101	530.177	999.514	953.973	828.207	912.376	887.518	865.396	723.071	-0.752904	0.0512423	-14.693	7.14e-49	1.04e-47	Hydrogen peroxide-inducible genes activator	NA	K04761	oxyR; LysR family transcriptional regulator, hydrogen peroxide-inducible genes activator	206	02026 03000	Biofilm formation - Escherichia coli [PATH:ko02026], Transcription factors [BR:ko03000],	09145 09182	09140 09180
D|1136176.5.peg.211	1	264015	266531	-	2517	3775	3662	3671	3383	3986	3873	1614	1778	2211	1655	2022	1813	2543.86	2562.38	2591.24	2494.72	2635.54	2528.79	2444.27	2487.04	2906.61	2537.78	2862.14	2714.47	2609.07	-0.0553813	0.0489992	-1.13025	0.258372	0.302563	Multimodular transpeptidase-transglycosylase (EC 2.4.1.129) (EC 3.4.-.-)	KEGG_ENZYME:2.4.1.129,KEGG_ENZYME:3.4.-.-	K05366	mrcA; penicillin-binding protein 1A [EC:2.4.1.129 3.4.16.4]	518	00550 01501 01003 01011	Peptidoglycan biosynthesis [PATH:ko00550], beta-Lactam resistance [PATH:ko01501], Glycosyltransferases [BR:ko01003], Peptidoglycan biosynthesis and degradation proteins [BR:ko01011],	09107 09175 09181	09100 09160 09180
D|1136176.5.peg.212	1	266725	267750	+	1026	65	78	70	73	82	79.5	34.5	51	43	51	36	28	43.8016	54.5782	49.4108	53.8322	54.2183	51.5812	51.4901	71.3382	56.5284	78.2036	50.958	41.9223	54.8219	-0.189009	0.140564	-1.34465	0.178737	0.217426	Type IV pilus biogenesis protein PilM	NA	K02662	pilM; type IV pilus assembly protein PilM	58	02044 02035	Secretion system [BR:ko02044], Bacterial motility proteins [BR:ko02035],	09183	09180
D|1136176.5.peg.213	1	267734	268348	+	615	37	35	34	40	36	41.5	17.5	13	10	21	17	9	24.9332	24.4902	23.9995	29.4971	23.8031	26.77	25.7451	18.1842	13.1461	32.2015	24.0635	13.475	23.3591	0.287533	0.20463	1.40514	0.15998	0.196286	Type IV pilus biogenesis protein PilN	NA	K02663	pilN; type IV pilus assembly protein PilN	39	02044 02035	Secretion system [BR:ko02044], Bacterial motility proteins [BR:ko02035],	09183	09180
D|1136176.5.peg.214	1	268341	268970	+	630	76	75.5	75.5	80	87.5	90.5	35	30	31.5	28	31.5	31	51.2142	52.479	52.9401	58.9942	57.5242	58.7634	53.0045	41.9636	40.753	42.9353	43.8805	46.414	50.0722	0.307459	0.138236	2.22415	0.0261381	0.0365681	Type IV pilus biogenesis protein PilO	NA	K02664	pilO; type IV pilus assembly protein PilO	56	02044 02035	Secretion system [BR:ko02044], Bacterial motility proteins [BR:ko02035],	09183	09180
D|1136176.5.peg.215	1	268957	269475	+	519	82	85.5	88.5	78	81.5	93.5	24	23	30.5	19	38.5	21	55.2574	59.4763	62.1164	57.5193	53.5571	60.7222	36.346	32.1721	39.4384	29.1347	53.789	31.4417	47.5809	0.642512	0.1491	4.30928	1.64e-05	3.34e-05	Type IV pilus biogenesis protein PilP	NA	K02665	pilP; type IV pilus assembly protein PilP	69	02044 02035	Secretion system [BR:ko02044], Bacterial motility proteins [BR:ko02035],	09183	09180
D|1136176.5.peg.216	1	269511	271226	+	1716	1367	1245	1214	1277	1417	1432	585	617	540	621	570	506	921.182	871.152	856.924	941.695	936.918	934.991	885.933	863.052	709.892	952.244	806.835	757.596	869.868	0.136132	0.0683029	1.99306	0.0462553	0.0623271	Type IV pilus biogenesis protein PilQ	NA	K02666	pilQ; type IV pilus assembly protein PilQ	254	02044 02035	Secretion system [BR:ko02044], Bacterial motility proteins [BR:ko02035],	09183	09180
D|1136176.5.peg.217	1	271403	271921	+	519	508	555	559	468	633	595	320	352	414	321	411	339	342.327	388.345	394.58	345.116	418.538	388.492	484.613	492.373	544.25	492.223	581.77	507.559	448.349	-0.446732	0.0705052	-6.33616	2.36e-10	6.94e-10	Shikimate kinase I (EC 2.7.1.71)	KEGG_ENZYME:2.7.1.71	K00891	aroK, aroL; shikimate kinase [EC:2.7.1.71]	147	00400	Phenylalanine, tyrosine and tryptophan biosynthesis [PATH:ko00400],	09105	09100
D|1136176.5.peg.218	1	271946	273034	+	1089	804	802	801	757	840	814	222	238	240	192	240	226	541.793	561.176	565.4	558.233	555.407	531.483	336.2	332.911	315.507	294.414	339.72	338.373	439.218	0.758975	0.0551396	13.7646	4.16e-43	5.12e-42	3-dehydroquinate synthase (EC 4.2.3.4)	KEGG_ENZYME:4.2.3.4	K01735	aroB; 3-dehydroquinate synthase [EC:4.2.3.4]	239	00400	Phenylalanine, tyrosine and tryptophan biosynthesis [PATH:ko00400],	09105	09100
D|1136176.5.peg.219	1	273115	274632	+	1518	2522	2459	2647	2368	2754	2713	857	989	1144	887	1059	928	1699.5	1720.61	1868.43	1746.23	1820.94	1771.39	1297.85	1383.4	1503.92	1360.13	1499.01	1389.43	1588.4	0.332525	0.0456362	7.28643	3.18e-13	1.12e-12	DamX%2C an inner membrane protein involved in bile resistance	NA	K03112	damX; DamX protein	108	99996	General function prediction only,	09194	09190
D|1136176.5.peg.220	1	274702	275547	+	846	232	234	279	259	274	262	88	92	106	67	118	109	156.338	163.735	196.937	190.994	181.168	171.067	133.269	128.688	139.349	102.738	167.029	163.198	157.876	0.343402	0.10708	3.20696	0.00134145	0.00223191	Methyl-directed repair DNA adenine methylase (EC 2.1.1.72)	KEGG_ENZYME:2.1.1.72	K06223	dam; DNA adenine methylase [EC:2.1.1.72]	266	03430 03032 03400 02048	Mismatch repair [PATH:ko03430], DNA replication proteins [BR:ko03032], DNA repair and recombination proteins [BR:ko03400], Prokaryotic defense system [BR:ko02048],	09124 09182 09183	09120 09180
D|1136176.5.peg.221	1	275748	276422	+	675	199	217	181	170	217	206	101	110	144	111	141	96	134.1	151.839	127.762	125.363	143.48	134.503	152.956	153.867	189.304	170.208	199.585	143.734	152.225	-0.307739	0.0941834	-3.26744	0.00108524	0.00182989	Ribulose-phosphate 3-epimerase (EC 5.1.3.1)	KEGG_ENZYME:5.1.3.1	K01783	rpe, RPE; ribulose-phosphate 3-epimerase [EC:5.1.3.1]	190	00030 00040 00710	Pentose phosphate pathway [PATH:ko00030], Pentose and glucuronate interconversions [PATH:ko00040], Carbon fixation in photosynthetic organisms [PATH:ko00710],	09101 09102	09100
D|1136176.5.peg.222	1	276540	277226	+	687	249	236	225	222	233	243	169	163	149	152	164	137	167.794	165.134	158.82	163.709	154.059	158.661	255.936	228.002	195.878	233.077	232.142	205.12	193.194	-0.47749	0.077038	-6.19811	5.71e-10	1.64e-09	Phosphoglycolate phosphatase (EC 3.1.3.18)	KEGG_ENZYME:3.1.3.18	K01091	gph; phosphoglycolate phosphatase [EC:3.1.3.18]	115	00630	Glyoxylate and dicarboxylate metabolism [PATH:ko00630],	09101	09100
D|1136176.5.peg.223	1	277403	278419	+	1017	262	300	271	233	301	282	176	175	177	135	206	157	176.554	209.916	191.29	171.821	199.021	184.125	266.537	244.788	232.687	207.01	291.593	235.064	217.534	-0.383872	0.0867773	-4.42364	9.7e-06	2.03e-05	Tryptophanyl-tRNA synthetase (EC 6.1.1.2)	KEGG_ENZYME:6.1.1.2	K01867	WARS, trpS; tryptophanyl-tRNA synthetase [EC:6.1.1.2]	262	00970 01007 03016	Aminoacyl-tRNA biosynthesis [PATH:ko00970], Amino acid related enzymes [BR:ko01007], Transfer RNA biogenesis [BR:ko03016],	09122 09181 09182	09120 09180
D|1136176.5.peg.224	1	278804	281398	+	2595	1961	1894	1833	1774	1975	2019	567	609	660	529	669	634	1321.46	1325.27	1293.86	1308.2	1305.87	1318.26	858.673	851.862	867.645	811.171	946.969	949.241	1096.54	0.574602	0.0418463	13.7312	6.6e-43	8.11e-42	Extracellular deoxyribonuclease Xds	NA	K07004	K07004; uncharacterized protein	273	99997	Function unknown,	09194	09190
D|1136176.5.peg.225	1	281587	282165	+	579	72	80	71	71	64	59	29	35	49	36	38	35	48.5187	55.9777	50.1166	52.3573	42.3167	38.5227	43.918	48.9576	64.4161	55.2026	53.789	52.4029	50.5413	-0.155299	0.142325	-1.09115	0.275206	0.320017	Para-aminobenzoate synthase%2C amidotransferase component (EC 2.6.1.85)	KEGG_ENZYME:2.6.1.85	K01664	pabA; para-aminobenzoate synthetase component II [EC:2.6.1.85]	107	00790	Folate biosynthesis [PATH:ko00790],	09108	09100
D|1136176.5.peg.226	1	282630	283841	+	1212	7195	7276	7199	6676	7768	7177	4145	3882	3760	3586	3799	3302	4848.5	5091.17	5081.54	4923.07	5136.19	4686.06	6277.25	5430.09	4942.95	5498.79	5377.48	4943.84	5186.41	-0.125282	0.0591586	-2.11774	0.0341974	0.0470075	Acetylornithine aminotransferase (EC 2.6.1.11) / N-succinyl-L%2CL-diaminopimelate aminotransferase (EC 2.6.1.17) / Succinylornithine transaminase (EC 2.6.1.81)	KEGG_ENZYME:2.6.1.11,KEGG_ENZYME:2.6.1.17,KEGG_ENZYME:2.6.1.81	K00821	argD; acetylornithine/N-succinyldiaminopimelate aminotransferase [EC:2.6.1.11 2.6.1.17]	321	00300 00220 01007	Lysine biosynthesis [PATH:ko00300], Arginine biosynthesis [PATH:ko00220], Amino acid related enzymes [BR:ko01007],	09105 09181	09100 09180
D|1136176.5.peg.227	1	283949	284968	+	1020	3228	3244	3240	3026	3482	3372	1218	1092	1291	1095	1202	1090	2175.26	2269.89	2287.01	2231.46	2302.29	2201.67	1844.56	1527.48	1697.17	1679.08	1701.43	1631.98	1962.44	0.418104	0.0427235	9.78628	1.29e-22	7.49e-22	Arginine N-succinyltransferase (EC 2.3.1.109)	KEGG_ENZYME:2.3.1.109	K00673	astA; arginine N-succinyltransferase [EC:2.3.1.109]	230	00330	Arginine and proline metabolism [PATH:ko00330],	09105	09100
D|1136176.5.peg.228	1	285008	286465	+	1458	7027	6915	7079	6349	7437	7061	2633	2686	2636	2229	2606	2361	4735.29	4838.57	4996.84	4681.93	4917.33	4610.32	3987.46	3757.14	3465.32	3417.96	3688.79	3534.95	4219.32	0.397428	0.0430934	9.22247	2.9e-20	1.54e-19	Succinylglutamic semialdehyde dehydrogenase (EC 1.2.1.71)	KEGG_ENZYME:1.2.1.71	K06447	astD; succinylglutamic semialdehyde dehydrogenase [EC:1.2.1.71]	337	00330	Arginine and proline metabolism [PATH:ko00330],	09105	09100
D|1136176.5.peg.229	1	286677	287468	+	792	3220	3357	3085	3083	3492	3316	1095	1095	1138	931	1057	1007	2169.87	2348.96	2177.6	2273.49	2308.9	2165.11	1658.28	1531.67	1496.03	1427.6	1496.18	1507.71	1880.12	0.560323	0.0423245	13.2387	5.24e-40	5.82e-39	D008480: hypothetical protein	NA			172
D|1136176.5.peg.230	1	287646	288278	-	633	6388	6428	6069	5777	6840	6786	2852	2993	3739	2650	3233	3132	4304.69	4497.8	4283.91	4260.12	4522.6	4430.76	4319.11	4186.57	4915.34	4063.52	4576.31	4689.31	4420.84	-0.0247325	0.0493278	-0.501391	0.616096	0.663092	Cyclic AMP receptor protein	NA	K10914	crp; CRP/FNR family transcriptional regulator, cyclic AMP receptor protein	209	02020 02024 05111 02025 02026 03000	Two-component system [PATH:ko02020], Quorum sensing [PATH:ko02024], Biofilm formation - Vibrio cholerae [PATH:ko05111], Biofilm formation - Pseudomonas aeruginosa [PATH:ko02025], Biofilm formation - Escherichia coli [PATH:ko02026], Transcription factors [BR:ko03000],	09132 09145 09182	09130 09140 09180
D|1136176.5.peg.231	1	288518	289387	-	870	1114	1126	1077	975	1159	1152	825	751	782	742	825	783	750.693	787.885	760.22	718.992	766.329	752.172	1249.39	1050.49	1028.03	1137.79	1167.79	1172.33	945.175	-0.583871	0.052578	-11.1049	1.19e-28	8.68e-28	Phosphoribulokinase (EC 2.7.1.19) homolog%2C function unknown	KEGG_ENZYME:2.7.1.19	K00855	PRK, prkB; phosphoribulokinase [EC:2.7.1.19]	253	00710	Carbon fixation in photosynthetic organisms [PATH:ko00710],	09102	09100
D|1136176.5.peg.232	1	289465	289677	-	213	387	374	400	416	422	430	179	218	219	215	217	200	260.788	261.696	282.347	306.77	279.026	280.759	271.08	304.936	287.901	329.682	307.163	299.445	289.299	-0.107295	0.0680371	-1.577	0.114795	0.14512	D01199774: hypothetical protein	NA	K09898	K09898; uncharacterized protein	44	99997	Function unknown,	09194	09190
D|1136176.5.peg.233	1	289769	290839	-	1071	2686	2564	2604	2519	2769	2787	1628	1707	1690	1615	1527	1643	1810.02	1794.08	1838.08	1857.58	1830.86	1819.71	2465.47	2387.73	2221.7	2476.45	2161.47	2459.94	2093.59	-0.371418	0.0407808	-9.10767	8.42e-20	4.38e-19	Hydrolase%2C alpha/beta fold family functionally coupled to Phosphoribulokinase	NA	K07019	K07019; uncharacterized protein	158	99997	Function unknown,	09194	09190
D|1136176.5.peg.234	1	291048	291518	-	471	2393.5	2343.5	2250.5	2177.5	2561.5	2496	2168	1934	2484.5	2009.5	1994.5	1981	1612.57	1639.45	1588.2	1605.38	1693.33	1629.71	3283.25	2705.25	3265.5	3080.61	2822.51	2966	2324.31	-0.891469	0.0524212	-17.0059	7.43e-65	1.69e-63	D01200117: hypothetical protein	NA			13
D|1136176.5.peg.235	1	291515	293437	-	1923	1391.5	1349.5	1322.5	1407.5	1495.5	1435	378	520	384.5	448.5	451.5	402	937.355	943.923	933.158	1037.56	988.491	936.95	572.449	727.369	504.812	686.965	638.39	601.885	792.442	0.631156	0.0782852	8.06227	7.49e-16	3.12e-15	Glutathione-regulated potassium-efflux system ATP-binding protein	NA	K06158	ABCF3; ATP-binding cassette, subfamily F, member 3	463	03012	Translation factors [BR:ko03012],	09182	09180
D|1136176.5.peg.236	1	293611	294195	+	585	349.5	337.5	327.5	328	355.5	331	110	112.5	109.5	95	85.5	126	235.181	235.806	230.819	241.876	234.725	216.119	166.586	156.664	143.293	145.673	120.317	188.65	192.976	0.600784	0.0860121	6.98488	2.85e-12	9.41e-12	Glutathione-regulated potassium-efflux system ancillary protein KefG	NA	K11748	kefG; glutathione-regulated potassium-efflux system ancillary protein KefG	96	02000	Transporters [BR:ko02000],	09183	09180
D|1136176.5.peg.237	1	294182	295978	+	1797	3371.5	3251.5	3192.5	2910	3211.5	3416	1153	1311.5	1522.5	1196	1323.5	1442	2271.62	2274.79	2253.13	2145.91	2123.11	2230.4	1746.12	1833.81	2000.84	1833.95	1872.71	2159	2062.12	0.216226	0.0516046	4.19006	2.79e-05	5.56e-05	Glutathione-regulated potassium-efflux system protein KefB	NA	K11747	kefB; glutathione-regulated potassium-efflux system protein KefB	367	02000	Transporters [BR:ko02000],	09183	09180
D|1136176.5.peg.238	1	296098	296334	+	237	307	322	315	263	344	335	117	164	145	136	159	118	206.878	225.31	222.348	193.943	227.452	218.731	177.187	229.401	190.619	208.543	225.064	176.673	208.513	0.0998872	0.0823569	1.21286	0.225184	0.267479	Putative cytoplasmic protein %2Cprobably associated with Glutathione-regulated potassium-efflux	NA	K07070	K07070; uncharacterized protein	26	99997	Function unknown,	09194	09190
D|1136176.5.peg.239	1	296431	297015	+	585	639	622	577	525	631	644	227	224	311	222	321	247	430.604	435.226	407.286	387.149	417.216	420.485	343.772	313.328	408.845	340.416	454.375	369.815	394.043	0.162105	0.0815465	1.98789	0.046824	0.0630203	FKBP-type peptidyl-prolyl cis-trans isomerase SlyD (EC 5.2.1.8)	KEGG_ENZYME:5.2.1.8	K03775	slyD; FKBP-type peptidyl-prolyl cis-trans isomerase SlyD [EC:5.2.1.8]	141	03110	Chaperones and folding catalysts [BR:ko03110],	09182	09180
D|1136176.5.peg.240	1	297219	298184	+	966	165	189	165	183	170	186	109	89	104	67	93	68	111.189	132.247	116.468	134.949	112.404	121.444	165.071	124.492	136.72	102.738	131.641	101.811	124.265	-0.0680728	0.111276	-0.611748	0.540704	0.588499	Isoaspartyl aminopeptidase (EC 3.4.19.5) @ Asp-X dipeptidase	KEGG_ENZYME:3.4.19.5	K13051	ASRGL1, iaaA; L-asparaginase / beta-aspartyl-peptidase [EC:3.5.1.1 3.4.19.5]	160	00250 00460 01002	Alanine, aspartate and glutamate metabolism [PATH:ko00250], Cyanoamino acid metabolism [PATH:ko00460], Peptidases and inhibitors [BR:ko01002],	09105 09106 09181	09100 09180
D|1136176.5.peg.241	1	298366	298593	-	228	90.5	97	115	103.5	119	120	74	64.5	75.5	61.5	91	55.5	60.6484	67.8729	81.1748	75.955	78.6826	78.3512	112.067	89.5224	98.5961	93.5377	128.81	82.3474	87.2971	-0.451306	0.120793	-3.7362	0.000187	0.000344	Protein SlyX	NA	K03745	slyX; SlyX protein	33	99996	General function prediction only,	09194	09190
D|1136176.5.peg.242	1	298598	299575	-	978	2022.5	1924	1909	1860.5	2053	2046	643	790.5	838.5	743.5	779	744.5	1362.57	1346.26	1347.5	1371.61	1357.44	1335.89	973.769	1105.04	1101.65	1139.32	1102.67	1113.94	1221.47	0.312731	0.038723	8.0761	6.69e-16	2.8e-15	FOG: WD40 repeat	NA			161
D|1136176.5.peg.243	1	299707	300483	+	777	2053	2135	2048	1974	2293	2323	1032	1176	1305	1138	1243	1162	1383.46	1493.9	1445.62	1455.68	1516.13	1516.75	1562.88	1644.97	1715.57	1745.01	1759.47	1739.78	1581.6	-0.20655	0.041292	-5.00217	5.67e-07	1.33e-06	FKBP-type peptidyl-prolyl cis-trans isomerase FkpA precursor (EC 5.2.1.8)	KEGG_ENZYME:5.2.1.8	K03772	fkpA; FKBP-type peptidyl-prolyl cis-trans isomerase FkpA [EC:5.2.1.8]	136	03110	Chaperones and folding catalysts [BR:ko03110],	09182	09180
D|1136176.5.peg.244	1	300689	301414	+	726	3565.5	3494.5	3296	3103.5	3567.5	3583	1710	1847	2021.5	1640	1927.5	1880	2402.35	2444.82	2326.54	2288.24	2358.49	2339.44	2589.65	2583.56	2656.84	2514.78	2727.67	2814.78	2503.93	-0.166122	0.0346317	-4.79681	1.61e-06	3.6e-06	YheO-like PAS domain	NA			172
D|1136176.5.peg.245	1	301408	301797	+	390	852.5	894	841	754	892	896	635.5	642	842.5	603.5	785	733	574.138	625.55	593.635	556.02	589.789	585.023	961.654	898.022	1106.91	924.643	1111.17	1097.47	802.001	-0.792025	0.0659951	-12.0013	3.5e-33	2.98e-32	tRNA 5-methylaminomethyl-2-thiouridine synthase TusD	NA	K07235	tusD, dsrE; tRNA 2-thiouridine synthesizing protein D [EC:2.8.1.-]	80	04122 03016	Sulfur relay system [PATH:ko04122], Transfer RNA biogenesis [BR:ko03016],	09123 09182	09120 09180
D|1136176.5.peg.246	1	301794	302150	+	357	451.5	492	430	411.5	459	467.5	293.5	295	382	252.5	382.5	280.5	303.916	344.263	303.523	303.083	303.49	304.917	443.724	412.642	502.183	386.418	540.721	419.223	380.675	-0.53967	0.082825	-6.51579	7.23e-11	2.2e-10	tRNA 5-methylaminomethyl-2-thiouridine synthase TusC	NA	K07236	tusC, dsrF; tRNA 2-thiouridine synthesizing protein C	83	04122 03016	Sulfur relay system [PATH:ko04122], Transfer RNA biogenesis [BR:ko03016],	09123 09182	09120 09180
D|1136176.5.peg.247	1	302159	302434	+	276	250.5	268.5	250	226	261.5	253.5	88	114	162	101	135	140.5	168.468	187.525	176.467	166.659	172.573	165.191	133.269	159.462	212.968	154.874	191.092	209.612	174.846	-0.0371243	0.102695	-0.361499	0.717726	0.757029	tRNA 5-methylaminomethyl-2-thiouridine synthase TusB	NA	K07237	tusB, dsrH; tRNA 2-thiouridine synthesizing protein B	24	04122 03016	Sulfur relay system [PATH:ko04122], Transfer RNA biogenesis [BR:ko03016],	09123 09182	09120 09180
D|1136176.5.peg.248	1	302617	302991	+	375	4409	4696	3764	3537	4060	4268	802	1035	1378	734	1323	1247	2971.1	3285.89	2656.89	2608.28	2684.46	2786.69	1214.56	1447.74	1811.54	1125.52	1872.71	1867.04	2194.37	0.86329	0.131607	6.55961	5.39e-11	1.65e-10	SSU ribosomal protein S12p (S23e)	NA	K02950	RP-S12, MRPS12, rpsL; small subunit ribosomal protein S12	173	03010 03011	Ribosome [PATH:ko03010], Ribosome [BR:ko03011],	09122 09182	09120 09180
D|1136176.5.peg.249	1	303098	303568	+	471	5524	6063	4684	4263	5096	5598	1583	2195	2765	1489	2686	2799	3722.47	4242.41	3306.29	3143.65	3369.47	3655.09	2397.32	3070.34	3634.91	2283.24	3802.03	4190.73	3401.49	0.145696	0.146435	0.994958	0.319756	0.366949	SSU ribosomal protein S7p (S5e)	NA	K02992	RP-S7, MRPS7, rpsG; small subunit ribosomal protein S7	143	03010 03011	Ribosome [PATH:ko03010], Ribosome [BR:ko03011],	09122 09182	09120 09180
D|1136176.5.peg.250	1	303735	305831	+	2097	14580	14062	13194	12826	14399	14461	3203	3835	4250	3317	3993	4167	9825.04	9839.47	9313.22	9458.24	9520.59	9441.98	4850.67	5364.35	5587.11	5086.3	5652.09	6238.94	7514.83	0.808134	0.0563165	14.3499	1.07e-46	1.48e-45	Translation elongation factor G	NA	K02355	fusA, GFM, EFG; elongation factor G	579	03012 03029	Translation factors [BR:ko03012], Mitochondrial biogenesis [BR:ko03029],	09182	09180
D|1136176.5.peg.251	1	305979	307163	+	1185	50859	47099	43835	41992	47016	48134	6270	6546	8053	6310	7633	7553	34272.4	32956.1	30941.7	30966.1	31086.9	31428	9495.38	9156.46	10586.6	9675.78	10804.5	11308.5	21056.5	1.65093	0.0580088	28.4601	3.66e-178	6.53e-176	Translation elongation factor Tu	NA	K02358	tuf, TUFM; elongation factor Tu	350	04626 03012 03029 04147	Plant-pathogen interaction [PATH:ko04626], Translation factors [BR:ko03012], Mitochondrial biogenesis [BR:ko03029], Exosome [BR:ko04147],	09159 09182 09183	09150 09180
D|1136176.5.peg.252	1	307608	307919	+	312	5485	5548	4504	4346	4991.5	5267.5	1973	2846.5	3655.5	2086.5	3122	3563.5	3696.18	3882.05	3179.23	3204.86	3300.04	3438.97	2987.94	3980.95	4804.92	3198.68	4419.19	5334.61	3785.64	-0.256419	0.132073	-1.9415	0.0521981	0.0696675	SSU ribosomal protein S10p (S20e)	NA	K02946	RP-S10, MRPS10, rpsJ; small subunit ribosomal protein S10	136	03010 03011	Ribosome [PATH:ko03010], Ribosome [BR:ko03011],	09122 09182	09120 09180
D|1136176.5.peg.253	1	307934	308563	+	630	7930	8030	6432	5992.5	7137.5	7398.5	2486	3255.5	4408.5	2526.5	4105.5	4338.5	5343.8	5618.76	4540.14	4418.67	4718.97	4830.35	3764.84	4553.05	5794.82	3873.38	5810.63	6494.96	4980.2	-0.0397088	0.135809	-0.292386	0.769991	0.803033	LSU ribosomal protein L3p (L3e)	NA	K02906	RP-L3, MRPL3, rplC; large subunit ribosomal protein L3	260	03010 03011	Ribosome [PATH:ko03010], Ribosome [BR:ko03011],	09122 09182	09120 09180
D|1136176.5.peg.254	1	308580	309182	+	603	6860.5	6998.5	5640	5197	6011	6351.5	1861	2404	3429	1841.5	3054	3494	4622.76	4896.65	3981.1	3832.41	3974.46	4146.74	2818.33	3362.68	4507.81	2823	4322.94	5231.31	4043.35	0.142048	0.149837	0.948017	0.343121	0.391247	LSU ribosomal protein L4p (L1e)	NA	K02926	RP-L4, MRPL4, rplD; large subunit ribosomal protein L4	183	03010 03011	Ribosome [PATH:ko03010], Ribosome [BR:ko03011],	09122 09182	09120 09180
D|1136176.5.peg.255	1	309179	309481	+	303	4394	4199.5	3511.5	3177	3886	4051	1142.5	1502.5	1912.5	1208.5	1750.5	1892.5	2960.99	2938.13	2478.3	2342.81	2569.42	2645.01	1729.46	2100.98	2513.54	1852.35	2477.12	2832.75	2453.41	0.238399	0.118421	2.01314	0.0440997	0.0596999	LSU ribosomal protein L23p (L23Ae)	NA	K02892	RP-L23, MRPL23, rplW; large subunit ribosomal protein L23	91	03010 03011	Ribosome [PATH:ko03010], Ribosome [BR:ko03011],	09122 09182	09120 09180
D|1136176.5.peg.256	1	309496	310320	+	825	14917.5	14967	12425	11716	13510	14158.5	4055.5	5649	7249	4212.5	6425	7054	10052.1	10472.7	8770.41	8639.7	8932.79	9244.14	6140.95	7901.75	9529.64	6458.7	9094.58	10561.4	8816.58	0.175386	0.127243	1.37835	0.168094	0.205448	LSU ribosomal protein L2p (L8e)	NA	K02886	RP-L2, MRPL2, rplB; large subunit ribosomal protein L2	240	03010 03011	Ribosome [PATH:ko03010], Ribosome [BR:ko03011],	09122 09182	09120 09180
D|1136176.5.peg.257	1	310340	310618	+	279	7496	7494	6289.5	5672	6788.5	7111	1744	2438.5	3049.5	1785	2703.5	3009	5051.34	5243.71	4439.2	4182.69	4488.21	4642.96	2641.14	3410.24	4008.26	2737.13	3826.1	4505.15	4098.01	0.408634	0.126167	3.23883	0.0012002	0.00200986	SSU ribosomal protein S19p (S15e)	NA	K02965	RP-S19, rpsS; small subunit ribosomal protein S19	95	03010 03011	Ribosome [PATH:ko03010], Ribosome [BR:ko03011],	09122 09182	09120 09180
D|1136176.5.peg.258	1	310629	310961	+	333	7867	7960	6862	6468	7580	7757.5	2479.5	3785	4239	2677.5	4029.5	3866	5301.35	5569.78	4843.67	4769.68	5011.88	5064.75	3754.24	5294.41	5572.65	4104.92	5703.05	5788.27	5064.89	0.0161877	0.108127	0.14971	0.880993	0.899202	LSU ribosomal protein L22p (L17e)	NA	K02890	RP-L22, MRPL22, rplV; large subunit ribosomal protein L22	106	03010 03011	Ribosome [PATH:ko03010], Ribosome [BR:ko03011],	09122 09182	09120 09180
D|1136176.5.peg.259	1	310980	311678	+	699	13598.5	13169	11775	11375.5	12552.5	12787.5	3017	4164	5090	3404.5	4507	5085.5	9163.3	9214.62	8311.6	8388.24	8299.36	8348.98	4568.99	5824.55	6691.39	5219.71	6379.66	7613.39	7335.32	0.510943	0.106438	4.80039	1.58e-06	3.54e-06	SSU ribosomal protein S3p (S3e)	NA	K02982	RP-S3, rpsC; small subunit ribosomal protein S3	206	03010 03011	Ribosome [PATH:ko03010], Ribosome [BR:ko03011],	09122 09182	09120 09180
D|1136176.5.peg.260	1	311690	312100	+	411	8208	8281	7132	6856.5	7674.5	7905	2064	2886	3637	2239	3326.5	3452.5	5531.14	5794.39	5034.25	5055.8	5074.04	5161.39	3125.75	4036.9	4781.25	3433.29	4707.95	5168.42	4742.05	0.325642	0.115325	2.82368	0.00474756	0.00733139	LSU ribosomal protein L16p (L10e)	NA	K02878	RP-L16, MRPL16, rplP; large subunit ribosomal protein L16	173	03010 03011	Ribosome [PATH:ko03010], Ribosome [BR:ko03011],	09122 09182	09120 09180
D|1136176.5.peg.261	1	312100	312291	+	192	2660.5	2677.5	2302.5	2184	2478.5	2616	678.5	883.5	1239	704	1181.5	1182	1792.5	1873.15	1624.91	1610.54	1638.45	1708.06	1026.77	1235.13	1628.81	1079.52	1671.7	1769.72	1554.94	0.28453	0.133196	2.13618	0.0326648	0.0450609	LSU ribosomal protein L29p (L35e)	NA	K02904	RP-L29, rpmC; large subunit ribosomal protein L29	52	03010 03011	Ribosome [PATH:ko03010], Ribosome [BR:ko03011],	09122 09182	09120 09180
D|1136176.5.peg.262	1	312291	312545	+	255	2036	2016.5	1708.5	1778.5	1826	1922	497	796.5	958	600.5	910	991.5	1372	1410.64	1205.62	1311.15	1207.35	1254.93	752.664	1113.43	1259.4	920.043	1288.1	1483.75	1214.92	0.186808	0.13629	1.37067	0.170479	0.208089	SSU ribosomal protein S17p (S11e)	NA	K02961	RP-S17, MRPS17, rpsQ; small subunit ribosomal protein S17	96	03010 03011	Ribosome [PATH:ko03010], Ribosome [BR:ko03011],	09122 09182	09120 09180
D|1136176.5.peg.263	1	312708	313079	+	372	12918.5	13365.5	11829	11037	12240.5	12658.5	2763	3346	4198	2470.5	3941	3764.5	8705.07	9351.77	8349.71	8138.99	8093.07	8264.75	4184.33	4680.34	5518.75	3787.51	5578.48	5635.56	6690.69	0.792543	0.100099	7.91757	2.42e-15	9.82e-15	LSU ribosomal protein L14p (L23e)	NA	K02874	RP-L14, MRPL14, rplN; large subunit ribosomal protein L14	114	03010 03011	Ribosome [PATH:ko03010], Ribosome [BR:ko03011],	09122 09182	09120 09180
D|1136176.5.peg.264	1	313091	313408	+	318	11812	12404.5	10813	9330	11641.5	12178.5	3536.5	4316.5	5005.5	3190.5	5177.5	4644.5	7959.77	8679.33	7632.55	6880.2	7697.01	7951.35	5354.97	6037.17	6579.64	4891.56	7328.04	6953.12	6995.39	0.333285	0.0985056	3.38341	0.000716	0.00123405	LSU ribosomal protein L24p (L26e)	NA	K02895	RP-L24, MRPL24, rplX; large subunit ribosomal protein L24	83	03010 03011	Ribosome [PATH:ko03010], Ribosome [BR:ko03011],	09122 09182	09120 09180
D|1136176.5.peg.265	1	313433	313972	+	540	14505	14874	13247	12108	13948	14571	4265	5506.5	6294	3812.5	6268.5	5905.5	9774.5	10407.6	9350.64	8928.77	9222.39	9513.8	6458.98	7701.72	8274.18	5845.34	8872.35	8841.12	8599.29	0.314443	0.101659	3.09313	0.00198059	0.00320854	LSU ribosomal protein L5p (L11e)	NA	K02931	RP-L5, MRPL5, rplE; large subunit ribosomal protein L5	166	03010 03011	Ribosome [PATH:ko03010], Ribosome [BR:ko03011],	09122 09182	09120 09180
D|1136176.5.peg.266	1	313989	314294	+	306	7327.5	7753	6882.5	6176.5	7293.5	7293	2147.5	2585	3329.5	1758	3062.5	2804.5	4937.46	5424.93	4857.78	4554.35	4822.12	4761.8	3251.45	3615.87	4376.35	2695.73	4334.26	4198.22	4319.19	0.385469	0.111	3.4727	0.000515	0.000903	SSU ribosomal protein S14p (S29e) @ SSU ribosomal protein S14p (S29e)%2C zinc-independent	NA	K02954	RP-S14, MRPS14, rpsN; small subunit ribosomal protein S14	107	03010 03011	Ribosome [PATH:ko03010], Ribosome [BR:ko03011],	09122 09182	09120 09180
D|1136176.5.peg.267	1	314324	314716	+	393	7860.5	8005	6964	6437	7428	7600.5	1859.5	2309.5	2906	1555	2650	2488.5	5296.63	5601.26	4915.67	4746.82	4911.38	4962.25	2815.3	3229.8	3820.27	2384.44	3751.07	3725.1	4180	0.625376	0.110121	5.67899	1.35e-08	3.58e-08	SSU ribosomal protein S8p (S15Ae)	NA	K02994	RP-S8, rpsH; small subunit ribosomal protein S8	150	03010 03011	Ribosome [PATH:ko03010], Ribosome [BR:ko03011],	09122 09182	09120 09180
D|1136176.5.peg.268	1	314727	315260	+	534	11979	12313.5	10880.5	9681.5	11598	11829	3202	3827	4952	2791.5	4411.5	4376.5	8072.3	8615.66	7679.85	7139.03	7668.58	7723.47	4849.16	5353.16	6509.97	4279.73	6243.77	6551.86	6723.88	0.472946	0.104328	4.53325	5.81e-06	1.24e-05	LSU ribosomal protein L6p (L9e)	NA	K02933	RP-L6, MRPL6, rplF; large subunit ribosomal protein L6	197	03010 03011	Ribosome [PATH:ko03010], Ribosome [BR:ko03011],	09122 09182	09120 09180
D|1136176.5.peg.269	1	315270	315623	+	354	6276.5	6222.5	5691	5348.5	6023.5	6250.5	1311.5	1709	2246	1312.5	2044	1943.5	4229.22	4353.66	4017.1	3943.76	3982.4	4080.79	1985.4	2390.53	2952.62	2011.83	2893.28	2909.11	3312.47	0.700155	0.105888	6.61219	3.79e-11	1.18e-10	LSU ribosomal protein L18p (L5e)	NA	K02881	RP-L18, MRPL18, rplR; large subunit ribosomal protein L18	92	03010 03011	Ribosome [PATH:ko03010], Ribosome [BR:ko03011],	09122 09182	09120 09180
D|1136176.5.peg.270	1	315638	316138	+	501	12007	11464.5	10534	9901.5	11105.5	11542.5	1917.5	2193.5	2791	1732.5	2588.5	2683	8091.17	8021.6	7435.61	7301.27	7342.61	7536.08	2903.13	3067.54	3669.09	2655.86	3663.31	4017.06	5475.36	1.19467	0.0950706	12.5661	3.24e-36	3.16e-35	SSU ribosomal protein S5p (S2e)	NA	K02988	RP-S5, MRPS5, rpsE; small subunit ribosomal protein S5	142	03010 03011	Ribosome [PATH:ko03010], Ribosome [BR:ko03011],	09122 09182	09120 09180
D|1136176.5.peg.271	1	316146	316322	+	177	6003	6030	5188	4784.5	5689	5924	1382	1583	2059.5	1174	1758.5	1830	4045.25	4219.32	3662.04	3527.85	3761.56	3867.94	2092.92	2214.28	2706.79	1800.22	2488.45	2739.92	3093.88	0.716824	0.0989225	7.24632	4.28e-13	1.5e-12	LSU ribosomal protein L30p (L7e)	NA	K02907	RP-L30, MRPL30, rpmD; large subunit ribosomal protein L30	70	03010 03011	Ribosome [PATH:ko03010], Ribosome [BR:ko03011],	09122 09182	09120 09180
D|1136176.5.peg.272	1	316328	316762	+	435	16598.5	16335	14291.5	13776	15894.5	16111.5	3154	3769	4551.5	2800	4271.5	4227.5	11184.9	11429.9	10087.6	10158.8	10509.1	10519.3	4776.47	5272.03	5982.81	4293.53	6045.6	6328.77	8049.07	0.96621	0.0917989	10.5253	6.61e-26	4.37e-25	LSU ribosomal protein L15p (L27Ae)	NA	K02876	RP-L15, MRPL15, rplO; large subunit ribosomal protein L15	119	03010 03011	Ribosome [PATH:ko03010], Ribosome [BR:ko03011],	09122 09182	09120 09180
D|1136176.5.peg.273	1	316783	318117	+	1335	29882.5	29217.5	25634.5	24445.5	27883	28685	7056.5	8038	9930	6125	9288.5	9163	20136.6	20443.7	18094.2	18026.4	18436.2	18729.2	10685.7	11243.5	13054.1	9392.1	13147.2	13719.1	15425.7	0.676499	0.0903876	7.48442	7.19e-14	2.63e-13	Preprotein translocase secY subunit (TC 3.A.5.1.1)	NA	K03076	secY; preprotein translocase subunit SecY	377	03060 03070 02024 02044	Protein export [PATH:ko03060], Bacterial secretion system [PATH:ko03070], Quorum sensing [PATH:ko02024], Secretion system [BR:ko02044],	09123 09131 09145 09183	09120 09130 09140 09180
D|1136176.5.peg.274	1	318159	318272	+	114	2803	2863	2399	1985	2598	2939	804	781	1192	732	1044	1083	1888.86	2003.3	1693.38	1463.79	1717.79	1918.95	1217.59	1092.45	1567.02	1122.45	1477.78	1621.5	1565.41	0.399793	0.115716	3.45497	0.00055	0.00096	LSU ribosomal protein L36p	NA	K02919	RP-L36, MRPL36, rpmJ; large subunit ribosomal protein L36	47	03010 03011	Ribosome [PATH:ko03010], Ribosome [BR:ko03011],	09122 09182	09120 09180
D|1136176.5.peg.275	1	318421	318777	+	357	12978	12739	11469	11298.5	12600	12650	2648.5	3671	3614.5	2305	3751	3549.5	8745.5	8913.74	8095.6	8331.45	8331.1	8259.53	4010.17	5134.95	4751.02	3534.5	5309.54	5313.65	6560.9	0.853	0.0967904	8.81286	1.22e-18	5.94e-18	SSU ribosomal protein S13p (S18e)	NA	K02952	RP-S13, rpsM; small subunit ribosomal protein S13	108	03010 03011	Ribosome [PATH:ko03010], Ribosome [BR:ko03011],	09122 09182	09120 09180
D|1136176.5.peg.276	1	318797	319186	+	390	15709	16127	14221	12824.5	15586	15885	5531.5	7258	8137.5	4838	7635	7224.5	10585.8	11284.4	10038.2	9456.77	10305.4	10371.7	8376.23	10152.4	10697	7418.61	10807.3	10816	10025.8	0.0904873	0.0960686	0.941904	0.346242	0.394322	SSU ribosomal protein S11p (S14e)	NA	K02948	RP-S11, MRPS11, rpsK; small subunit ribosomal protein S11	126	03010 03011	Ribosome [PATH:ko03010], Ribosome [BR:ko03011],	09122 09182	09120 09180
D|1136176.5.peg.277	1	319218	319838	+	621	17143.5	17242.5	14907.5	13609.5	15843.5	16577	4525.5	5902.5	7305	4173.5	6867	6366	11552.2	12064.6	10522.4	10035.6	10475.4	10823.6	6852.73	8255.64	9603.26	6398.9	9720.24	9531.34	9652.99	0.378499	0.109379	3.46045	0.000539	0.000943	SSU ribosomal protein S4p (S9e)	NA	K02986	RP-S4, rpsD; small subunit ribosomal protein S4	191	03010 03011	Ribosome [PATH:ko03010], Ribosome [BR:ko03011],	09122 09182	09120 09180
D|1136176.5.peg.278	1	319861	320853	+	993	18533	18902	15572.5	14573	16745	17416.5	4577	5907	7428.5	4171.5	7019.5	7037	12488.9	13226.1	10991.8	10746.5	11071.8	11371.4	6931.48	8262.64	9764.96	6395.83	9935.39	10536	10143.6	0.431479	0.122166	3.53192	0.000413	0.00073	DNA-directed RNA polymerase alpha subunit (EC 2.7.7.6)	KEGG_ENZYME:2.7.7.6	K03040	rpoA; DNA-directed RNA polymerase subunit alpha [EC:2.7.7.6]	302	03020 03021 03400	RNA polymerase [PATH:ko03020], Transcription machinery [BR:ko03021], DNA repair and recombination proteins [BR:ko03400],	09121 09182	09120 09180
D|1136176.5.peg.279	1	320878	321258	+	381	4289	4483	3826	3514	4048.5	4432	1422.5	1705	2373.5	1225	2053.5	2132.5	2890.23	3136.85	2700.65	2591.32	2676.53	2893.77	2153.5	2384.93	3119.58	1878.42	2906.02	3192.08	2710.32	0.111184	0.124285	0.894588	0.371007	0.419337	LSU ribosomal protein L17p	NA	K02879	RP-L17, MRPL17, rplQ; large subunit ribosomal protein L17	161	03010 03011	Ribosome [PATH:ko03010], Ribosome [BR:ko03011],	09122 09182	09120 09180
D|1136176.5.peg.280	1	321273	321386	-	114	31.5	26.5	23	20.5	24	25.5	15	15.5	18	12	14	18.5	20.89	18.1927	16.235	14.7485	15.8688	16.3232	22.7162	20.9818	23.6631	18.4009	19.817	26.9501	19.5656	-0.373196	0.209893	-1.77802	0.0753998	0.0980683	hypothetical protein	NA			NA
D|1136176.5.peg.281	1	321494	321988	-	495	3681	3352	3478	3485	3654	3741	1705	1921	2062	1937	1932	1964	2480.52	2345.46	2455.01	2569.93	2416.02	2442.6	2582.08	2687.07	2710.73	2970.2	2734.75	2940.55	2611.24	-0.176417	0.0419631	-4.20411	2.62e-05	5.24e-05	D01200078: hypothetical protein	NA			14
D|1136176.5.peg.282	1	322125	322745	-	621	289	250	237	257	287	271	174	157	232	140	177	212	194.749	174.93	167.291	189.519	189.764	176.943	263.508	219.61	304.991	214.677	250.543	317.412	221.995	-0.523865	0.0990118	-5.29094	1.22e-07	3e-07	FKBP-type peptidyl-prolyl cis-trans isomerase FklB (EC 5.2.1.8)	KEGG_ENZYME:5.2.1.8	K03773	fklB; FKBP-type peptidyl-prolyl cis-trans isomerase FklB [EC:5.2.1.8]	173	03110	Chaperones and folding catalysts [BR:ko03110],	09182	09180
D|1136176.5.peg.283	1	322959	323537	+	579	1675	1583	1519	1566	1755	1661	915	791	941	944	898	790	1128.73	1107.66	1072.21	1154.81	1160.4	1084.51	1385.69	1106.44	1237.05	1447.53	1271.12	1182.81	1194.91	-0.185119	0.0634776	-2.9163	0.00354213	0.0055568	Putative cell envelope opacity-associated protein A	NA	K07269	ytfB; uncharacterized protein	27	99997	Function unknown,	09194	09190
D|1136176.5.peg.284	1	323596	324444	-	849	90.5	96	94.5	77	107.5	103.5	74	65	55.5	67.5	60.5	74	60.6484	67.1732	66.3516	56.7819	70.7482	67.2515	112.067	90.9212	72.3038	102.738	84.93	110.795	80.2258	-0.551846	0.1186	-4.65303	3.27e-06	7.1e-06	D01289198: hypothetical protein	NA			84
D|1136176.5.peg.285	1	324444	324896	-	453	23.5	18	18.5	21	21.5	20.5	9	21	10.5	15.5	9.5	11	15.499	12.595	12.7056	15.486	13.8852	13.0585	13.6297	29.3745	13.1461	23.0011	12.7395	16.4695	15.9658	-0.378862	0.238739	-1.58693	0.112529	0.142371	ElaA protein	NA	K02348	elaA; ElaA protein	86	99996	General function prediction only,	09194	09190
D|1136176.5.peg.286	1	324954	325520	-	567	42	43	43	41	38	41	32	25	25	25	25	19	28.3026	30.088	30.3523	30.2345	25.1255	26.77	48.4613	34.9697	32.8654	38.3351	35.3875	28.4473	32.4449	-0.352754	0.166508	-2.11854	0.034129	0.0469273	cAMP-binding proteins - catabolite gene activator and regulatory subunit of cAMP-dependent protein kinases	NA			56
D|1136176.5.peg.287	1	325616	327370	-	1755	1869	1776.5	1870	1854	1984	1993	789.5	944	1000	874	974	1016	1259.47	1242.7	1319.97	1367.19	1311.82	1301.28	1194.87	1320.46	1314.61	1340.2	1378.7	1521.18	1322.7	-0.0486859	0.0537814	-0.905256	0.36533	0.413524	Putative hemolysin	NA			258
D|1136176.5.peg.288	1	327383	327826	-	444	569.5	518.5	568	533.5	581	585	186.5	240.5	290	216	283	298.5	383.433	362.455	400.933	393.049	384.156	381.962	281.681	335.709	381.238	331.215	400.586	446.173	373.549	0.0823201	0.0901356	0.913292	0.361089	0.409523	D01200195: hypothetical protein	NA			26
D|1136176.5.peg.289	1	327837	328274	-	438	636.5	622.5	667	608	665	643.5	198	346	346	252	284.5	323	428.582	435.226	470.814	448.356	439.697	419.832	299.854	483.98	454.857	386.418	402.002	483.604	429.435	0.0722684	0.0986319	0.732709	0.463736	0.512905	D01200156: hypothetical protein	NA			67
D|1136176.5.peg.290	1	328287	329036	-	750	513	459	475	444.5	505.5	520	181	237.5	231.5	202	201	181	345.696	321.172	335.287	327.418	333.905	339.522	274.109	331.513	303.676	309.748	284.515	270.998	314.797	0.173569	0.0628103	2.76339	0.00572047	0.00877252	D01201599: hypothetical protein	NA			117
D|1136176.5.peg.291	1	329038	329580	-	543	688	703	665.5	655.5	737.5	733	293.5	392	449.5	302.5	369.5	358.5	463.623	491.904	469.402	483.015	487.303	478.596	443.724	548.325	590.262	463.088	522.319	536.007	498.131	-0.11369	0.0655243	-1.73508	0.0827264	0.106938	D01199900: hypothetical protein	NA			27
D|1136176.5.peg.292	1	329600	330733	-	1134	1931	1834	1997	1884	2053.5	2089	1058.5	1224.5	1190	1293.5	1160.5	1174.5	1301.25	1283.29	1409.62	1389.31	1357.44	1363.96	1602.25	1712.12	1564.39	1982.69	1641.98	1757.74	1530.5	-0.339749	0.0585057	-5.80711	6.36e-09	1.72e-08	D-alanine-D-alanine ligase	NA			161
D|1136176.5.peg.293	1	330730	331317	-	588	725	694.5	783.5	754.5	764.5	781.5	326	387.5	415	476	338.5	327.5	488.557	485.606	552.695	556.02	505.155	509.936	493.699	541.331	545.565	729.901	478.439	489.593	531.375	-0.0812771	0.0972099	-0.836099	0.403099	0.45165	D01199865: hypothetical protein	NA			51
D|1136176.5.peg.294	1	331645	333621	-	1977	4694	4722	4644	4336	4974	4872	2608	2939	2760	2998	2879	2819	3163.15	3304.08	3278.05	3197.49	3288.8	3181.06	3949.59	4111.04	3628.34	4597.15	4075.22	4220.68	3666.22	-0.340233	0.0510068	-6.67035	2.55e-11	8.03e-11	2'%2C3'-cyclic-nucleotide 2'-phosphodiesterase (EC 3.1.4.16)	KEGG_ENZYME:3.1.4.16	K01119	cpdB; 2',3'-cyclic-nucleotide 2'-phosphodiesterase / 3'-nucleotidase [EC:3.1.4.16 3.1.3.6]	479	00230 00240	Purine metabolism [PATH:ko00230], Pyrimidine metabolism [PATH:ko00240],	09104	09100
D|1136176.5.peg.295	1	334069	334977	+	909	79	61.5	79.5	75.5	64.5	72	24	16.5	13.5	19	15	11	53.2358	42.683	55.7636	55.3071	42.3167	47.0107	36.346	22.3806	17.09	29.1347	21.2325	16.4695	36.5808	1.06434	0.185324	5.74312	9.29e-09	2.49e-08	Sulfate adenylyltransferase subunit 2 (EC 2.7.7.4)	KEGG_ENZYME:2.7.7.4	K00957	cysD; sulfate adenylyltransferase subunit 2 [EC:2.7.7.4]	397	00920 00230 00450 00261	Sulfur metabolism [PATH:ko00920], Purine metabolism [PATH:ko00230], Selenocompound metabolism [PATH:ko00450], Monobactam biosynthesis [PATH:ko00261],	09102 09104 09106 09110	09100
D|1136176.5.peg.296	1	334996	336426	+	1431	239	205.5	214.5	212.5	206.5	214	80	55.5	64.5	43	61	51	161.055	143.443	151.056	156.335	136.207	139.726	121.153	76.9333	84.1353	65.9364	86.3455	76.3585	116.557	0.797716	0.113286	7.04161	1.9e-12	6.35e-12	Sulfate adenylyltransferase subunit 1 (EC 2.7.7.4)	KEGG_ENZYME:2.7.7.4	K00956	cysN; sulfate adenylyltransferase subunit 1 [EC:2.7.7.4]	339	00920 00230 00450 00261	Sulfur metabolism [PATH:ko00920], Purine metabolism [PATH:ko00230], Selenocompound metabolism [PATH:ko00450], Monobactam biosynthesis [PATH:ko00261],	09102 09104 09106 09110	09100
D|1136176.5.peg.297	1	336500	338224	+	1725	349	271	280	328.5	297.5	287	71	53	49	74	33	36	235.181	189.624	197.643	241.876	196.376	187.39	107.523	74.1357	64.4161	113.472	46.7115	53.9001	142.354	1.4445	0.176877	8.16666	3.17e-16	1.35e-15	Sulfate permease%2C Trk-type	NA			309
D|1136176.5.peg.298	1	338249	338869	+	621	270	246	252	258.5	246.5	251	98	100	92	88	98	76	181.945	172.131	177.879	190.256	162.655	163.885	148.413	139.879	120.945	134.94	138.719	113.789	153.786	0.396485	0.0880187	4.50456	6.65e-06	1.41e-05	Adenylylsulfate kinase (EC 2.7.1.25)	KEGG_ENZYME:2.7.1.25	K00860	cysC; adenylylsulfate kinase [EC:2.7.1.25]	141	00920 00230	Sulfur metabolism [PATH:ko00920], Purine metabolism [PATH:ko00230],	09102 09104	09100
D|1136176.5.peg.299	1	339034	339942	-	909	736	686	736	663	802	784	613	650	577	554	657	515	495.969	480.008	519.519	488.914	530.281	511.895	928.336	909.212	758.532	849.506	929.983	771.071	681.102	-0.765212	0.0635412	-12.0428	2.12e-33	1.83e-32	D01200110: hypothetical protein	NA			69
D|1136176.5.peg.300	1	340099	340203	+	105	45	42	40	42	51	42	6	8	6	5	8	2	30.3242	29.3883	28.2347	30.972	33.7211	27.4229	9.08649	11.1903	7.88769	7.66702	11.324	2.99445	19.1844	1.83605	0.272969	6.72621	1.74e-11	5.53e-11	hypothetical protein	NA			NA
D|1136176.5.peg.301	1	340294	340809	-	516	150	175.5	150	140	167	169.5	166.5	165	200	141	121	177.5	101.081	122.451	105.88	103.24	110.42	110.345	251.393	230.8	262.923	216.21	171.275	265.009	170.919	-1.09688	0.104638	-10.4826	1.04e-25	6.82e-25	D003461: hypothetical protein	NA	K09950	K09950; uncharacterized protein	118	99997	Function unknown,	09194	09190
D|1136176.5.peg.302	1	340824	342083	-	1260	610	666.5	658.5	567.5	692	689	293.5	362	405	250	337.5	335	411.062	466.014	464.461	418.121	457.549	449.867	443.724	506.361	532.419	383.351	477.023	501.571	459.294	-0.0949085	0.075472	-1.25753	0.208561	0.249714	ABC-type antimicrobial peptide transport system%2C permease component	NA	K02004	ABC.CD.P; putative ABC transport system permease protein	296	02000	Transporters [BR:ko02000],	09183	09180
D|1136176.5.peg.303	1	342080	342796	-	717	1191	1205	1185.5	1130.5	1289	1319.5	670	681	779	651	664.5	582.5	802.581	843.163	836.454	833.293	852.285	861.211	1014.66	952.574	1024.08	998.246	939.892	871.385	902.486	-0.20628	0.0458755	-4.49652	6.91e-06	1.46e-05	ABC transporter ATP-binding protein YvcR	NA	K02003	ABC.CD.A; putative ABC transport system ATP-binding protein	121	02000	Transporters [BR:ko02000],	09183	09180
D|1136176.5.peg.304	1	342935	343672	-	738	1603	1690	1694	1606	1748	1862	806	972	1178	667	1125	1170	1080.22	1182.53	1195.74	1184.31	1155.77	1215.75	1220.62	1359.62	1548.62	1022.78	1592.44	1751.75	1292.51	-0.276804	0.110821	-2.49777	0.0124977	0.0183647	Zinc ABC transporter%2C periplasmic-binding protein ZnuA	NA			18
D|1136176.5.peg.305	1	344095	344646	-	552	1793	1763	1715	1516	1812	1885	984	1050	1341	1117	1122	1157	1208.25	1233.61	1210.56	1117.94	1198.09	1230.77	1490.18	1468.73	1762.9	1712.81	1588.19	1732.29	1412.86	-0.438255	0.0553516	-7.91766	2.42e-15	9.82e-15	Protein ytfJ precursor	NA	K07109	K07109; uncharacterized protein	112	99997	Function unknown,	09194	09190
D|1136176.5.peg.306	1	344899	345099	+	201	134	140	142	153	164	190	190	145	197	140	163	178	90.2988	97.9609	100.233	112.826	108.437	124.056	287.739	202.824	258.979	214.677	230.726	266.506	174.605	-1.20433	0.106094	-11.3515	7.29e-30	5.57e-29	D01201012: hypothetical protein	NA			30
D|1136176.5.peg.307	1	345208	345837	-	630	1140	1091	1146	1126	1140	1194	427	537	502	432	461	511	768.213	763.395	808.925	830.343	753.766	779.595	646.655	751.149	659.936	662.431	652.545	765.082	736.836	0.184806	0.055139	3.35163	0.000803	0.00137813	Peptide methionine sulfoxide reductase MsrA (EC 1.8.4.11)	KEGG_ENZYME:1.8.4.11	K07304	msrA; peptide-methionine (S)-S-oxide reductase [EC:1.8.4.11]	149	99980	Enzymes with EC numbers,	09191	09190
D|1136176.5.peg.308	1	346051	347763	+	1713	1440	1376.5	1280.5	1207	1331.5	1434	576.5	730	717.5	557.5	656	663.5	970.375	962.816	903.511	890.075	880.055	936.297	872.303	1021.11	942.578	854.106	928.568	992.661	929.538	-0.018339	0.053113	-0.345282	0.729882	0.766541	Uncharacterized protein YtfM precursor	NA	K07278	tamA; translocation and assembly module TamA	280	02000	Transporters [BR:ko02000],	09183	09180
D|1136176.5.peg.309	1	347760	351512	+	3753	5262	4587.5	4430.5	4630	4747.5	4832	1013.5	1058	1067.5	976.5	1069	977.5	3545.91	3209.62	3127	3414.29	3138.71	3154.94	1534.1	1479.92	1402.69	1496.6	1513.17	1462.79	2373.31	1.14039	0.0454122	25.1121	3.67e-139	3.48e-137	Uncharacterized protein YtfN	NA	K09800	tamB; translocation and assembly module TamB	416	02000	Transporters [BR:ko02000],	09183	09180
D|1136176.5.peg.310	1	351586	351945	+	360	8880	7873	8573	9483	9103	8976	1105	1398	1281	1493	1413	1335	5983.98	5508.9	6051.41	6993.02	6018.89	5860.67	1673.43	1955.5	1684.02	2289.37	2000.1	1998.8	4001.51	1.65059	0.083465	19.7758	4.81e-87	1.75e-85	UPF0131 protein YtfP	NA			41
D|1136176.5.peg.311	1	352023	352379	+	357	18876	17403	19398	21887	19695	20545	6372	6038	6198	6786	5676	6190	12720	12177.2	13692.4	16140.1	13022.3	13414.4	9649.85	8445.88	8147.98	10405.7	8034.38	9267.83	11259.8	0.589299	0.0843242	6.9885	2.78e-12	9.19e-12	D01202625: hypothetical protein	NA			10
D|1136176.5.peg.312	1	352478	353488	-	1011	1425	1429	1459	1452	1568	1533	524	659	704	505	701	552	960.267	999.901	1029.86	1070.74	1036.76	1000.94	793.554	921.801	925.488	774.369	992.265	826.469	944.368	0.21893	0.0634918	3.44816	0.000564	0.000984	Fructose-1%2C6-bisphosphatase%2C type I (EC 3.1.3.11)	KEGG_ENZYME:3.1.3.11	K03841	FBP, fbp; fructose-1,6-bisphosphatase I [EC:3.1.3.11]	362	00010 00030 00051 00710 00680 04152 04910 04922 04147	Glycolysis / Gluconeogenesis [PATH:ko00010], Pentose phosphate pathway [PATH:ko00030], Fructose and mannose metabolism [PATH:ko00051], Carbon fixation in photosynthetic organisms [PATH:ko00710], Methane metabolism [PATH:ko00680], AMPK signaling pathway [PATH:ko04152], Insulin signaling pathway [PATH:ko04910], Glucagon signaling pathway [PATH:ko04922], Exosome [BR:ko04147],	09101 09102 09132 09152 09183	09100 09130 09150 09180
D|1136176.5.peg.313	1	353759	355117	+	1359	4445	3736	3764	4229	4032	4091	448	342	290	425	302	311	2995.36	2614.16	2656.89	3118.58	2665.95	2671.12	678.458	478.385	381.238	651.697	427.481	465.637	1650.41	2.44088	0.130453	18.7108	4.04e-78	1.22e-76	UDP-N-acetylmuramate:L-alanyl-gamma-D-glutamyl-meso-diaminopimelate ligase (EC 6.3.2.-)	KEGG_ENZYME:6.3.2.-	K02558	mpl; UDP-N-acetylmuramate: L-alanyl-gamma-D-glutamyl-meso-diaminopimelate ligase [EC:6.3.2.45]	340	99980	Enzymes with EC numbers,	09191	09190
D|1136176.5.peg.314	1	355156	355779	+	624	3933	3166	3185	3484	3289	3353	384	261	232	359	193	229	2650.34	2215.32	2248.19	2569.2	2174.68	2189.26	581.535	365.084	304.991	550.492	273.191	342.865	1372.1	2.53967	0.169269	15.0037	6.94e-51	1.08e-49	3-polyprenyl-4-hydroxybenzoate carboxy-lyase UbiX (EC 4.1.1.-)	KEGG_ENZYME:4.1.1.-	K03186	ubiX, bsdB, PAD1; flavin prenyltransferase [EC:2.5.1.129]	161	00130 00940 00627	Ubiquinone and other terpenoid-quinone biosynthesis [PATH:ko00130], Phenylpropanoid biosynthesis [PATH:ko00940], Aminobenzoate degradation [PATH:ko00627],	09108 09110 09111	09100
D|1136176.5.peg.315	1	355859	355999	+	141	289	249	256.5	320	264.5	264	43	36	31.5	39	23.5	29.5	194.749	174.23	180.702	235.977	174.556	172.373	65.1199	50.3563	40.753	59.8028	32.5565	43.4195	118.716	1.9621	0.146043	13.4351	3.77e-41	4.33e-40	hypothetical protein	NA			6
D|1136176.5.peg.316	1	355996	356988	+	993	904	787	775.5	801	797.5	845	136	119	144.5	151	124.5	124.5	609.18	550.68	547.048	590.679	526.975	551.723	205.96	166.456	189.304	231.544	175.522	185.656	377.561	1.55137	0.0771593	20.1061	6.53e-90	2.42e-88	Thiamin ABC transporter%2C substrate-binding component	NA	K02064	thiB, tbpA; thiamine transport system substrate-binding protein	230	02010 02000	ABC transporters [PATH:ko02010], Transporters [BR:ko02000],	09131 09183	09130 09180
D|1136176.5.peg.317	1	357074	358669	+	1596	299	286.5	284.5	263.5	264.5	292.5	72.5	99	105.5	98.5	101.5	101	201.488	200.12	200.467	193.943	174.556	190.655	109.038	138.48	138.035	150.274	142.965	151.22	165.937	0.483448	0.0860902	5.6156	1.96e-08	5.13e-08	Thiamin ABC transporter%2C transmembrane component	NA	K02063	thiP; thiamine transport system permease protein	320	02010 02000	ABC transporters [PATH:ko02010], Transporters [BR:ko02000],	09131 09183	09130 09180
D|1136176.5.peg.318	1	358680	359384	+	705	126	129.5	131.5	109.5	126.5	133.5	32.5	31	34.5	46.5	44.5	36	84.9078	90.264	92.4687	80.3796	83.311	86.8393	48.4613	43.3624	44.6969	70.5366	62.282	53.9001	70.1175	0.687587	0.125735	5.46854	4.54e-08	1.15e-07	Thiamin ABC transporter%2C ATPase component	NA	K02062	thiQ; thiamine transport system ATP-binding protein [EC:7.6.2.15]	116	02010 02000	ABC transporters [PATH:ko02010], Transporters [BR:ko02000],	09131 09183	09130 09180
D|1136176.5.peg.319	1	359498	360022	-	525	3926	3660	3648	3632	3983	3852	1598	1628	1790	1850	1646	1487	2645.62	2560.98	2575.01	2678.34	2633.55	2515.07	2420.04	2277.23	2353.16	2836.8	2329.91	2226.37	2504.34	0.112271	0.0563994	1.99065	0.0465192	0.0626646	D138315: Putative alpha helix protein	NA	K09889	yjgA; ribosome-associated protein	89	03009	Ribosome biogenesis [BR:ko03009],	09182	09180
D|1136176.5.peg.320	1	360141	361484	+	1344	1925	1742	1834	1736	1987	1936	807	777	877	775	907	778	1297.2	1218.91	1294.56	1280.17	1313.8	1264.07	1222.13	1086.86	1152.92	1188.39	1283.86	1164.84	1230.64	0.111871	0.0434035	2.57747	0.0099526	0.0147793	TldE protein%2C part of TldE/TldD proteolytic complex	NA	K03592	pmbA; PmbA protein	433	01002	Peptidases and inhibitors [BR:ko01002],	09181	09180
D|1136176.5.peg.321	1	361590	362945	-	1356	1054	1083	1044	962	1095	1083	845	920	973	806	905	991	710.26	757.797	736.926	709.405	724.012	707.12	1279.68	1286.88	1279.12	1235.92	1281.03	1483.75	1015.99	-0.852337	0.0491847	-17.3293	2.83e-67	6.84e-66	Magnesium transporter	NA	K06213	mgtE; magnesium transporter	306	02000	Transporters [BR:ko02000],	09183	09180
D|1136176.5.peg.322	1	363093	363368	-	276	109	112	128	95	105.5	128	69	69	80.5	61.5	67	75.5	73.452	78.3687	90.3511	70.0556	69.4258	83.5747	104.495	96.5163	105.169	93.5377	94.8385	112.292	89.3397	-0.383246	0.107943	-3.55043	0.000385	0.000682	Phosphocarrier protein%2C nitrogen regulation associated	NA	K08485	ptsO, npr; phosphocarrier protein NPr	62	02060 02000	Phosphotransferase system (PTS) [PATH:ko02060], Transporters [BR:ko02000],	09131 09183	09130 09180
D|1136176.5.peg.323	1	363371	364240	-	870	1309	1334.5	1288.5	1175	1362	1343	1139.5	1036	1234	1074	1198	1159.5	882.098	933.427	909.158	866.477	900.552	876.881	1724.92	1449.14	1622.23	1646.88	1695.77	1735.28	1270.23	-0.878583	0.0485544	-18.0948	3.5e-73	9.67e-72	D000506: Hypothetical ATP-binding protein	NA	K06958	rapZ; RNase adapter protein RapZ	177	03019	Messenger RNA biogenesis [BR:ko03019],	09182	09180
D|1136176.5.peg.324	1	364242	364703	-	462	4857.5	4598	4382	4310	5087.5	4967	3417.5	3667	3650	3127	3347	3195	3272.99	3217.32	3093.11	3178.31	3363.52	3243.09	5174.76	5129.35	4798.34	4794.96	4737.68	4783.64	4065.59	-0.602838	0.0347229	-17.3614	1.62e-67	3.97e-66	PTS system nitrogen-specific IIA component%2C PtsN	NA	K02806	ptsN; nitrogen PTS system EIIA component [EC:2.7.1.-]	121	02060 02000	Phosphotransferase system (PTS) [PATH:ko02060], Transporters [BR:ko02000],	09131 09183	09130 09180
D|1136176.5.peg.325	1	364705	364992	-	288	3963.5	3733.5	3953.5	3790	4348	4306	2314	3249	2957.5	2571.5	2775	2548	2670.55	2612.06	2790.3	2794.85	2874.89	2811.5	3504.36	4544.66	3887.31	3942.38	3928.01	3814.93	3347.98	-0.51308	0.0575228	-8.91959	4.68e-19	2.33e-18	Ribosome hibernation protein YhbH	NA	K05808	yhbH; putative sigma-54 modulation protein	67	03009	Ribosome biogenesis [BR:ko03009],	09182	09180
D|1136176.5.peg.326	1	365053	366513	-	1461	13561	12551	12967	12710	14071	13894	7470	7957	7898	7662	7302	6905	9138.37	8782.19	9152.99	9372.7	9303.72	9071.77	11312.7	11130.2	10382.8	11748.9	10336	10338.3	10005.9	-0.251084	0.0400613	-6.26751	3.67e-10	1.06e-09	RNA polymerase sigma-54 factor RpoN	NA	K03092	rpoN; RNA polymerase sigma-54 factor	334	02020 05111 02040 03021	Two-component system [PATH:ko02020], Biofilm formation - Vibrio cholerae [PATH:ko05111], Flagellar assembly [PATH:ko02040], Transcription machinery [BR:ko03021],	09132 09145 09142 09182	09130 09140 09180
D|1136176.5.peg.327	1	366568	367293	-	726	1789.5	1808	1721	1608	1874	1817	803.5	906.5	1012	783	908.5	821.5	1205.56	1265.09	1214.8	1185.78	1239.09	1186.37	1216.08	1267.3	1330.39	1200.66	1285.27	1229.22	1235.47	-0.0464673	0.0382157	-1.21592	0.224015	0.266294	Lipopolysaccharide ABC transporter%2C ATP-binding protein LptB	NA	K06861	lptB; lipopolysaccharide export system ATP-binding protein [EC:3.6.3.-]	199	02010 02000	ABC transporters [PATH:ko02010], Transporters [BR:ko02000],	09131 09183	09130 09180
D|1136176.5.peg.328	1	367296	367790	-	495	3233.5	3241.5	3099.5	2908.5	3490	3395.5	1349	1405	1645.5	1414.5	1367.5	1336	2178.63	2267.79	2187.49	2144.44	2307.58	2216.69	2042.95	1965.3	2162.54	2168.23	1934.99	2000.29	2131.41	0.116189	0.0390032	2.97895	0.00289241	0.00459343	LptA%2C protein essential for LPS transport across the periplasm	NA	K09774	lptA; lipopolysaccharide export system protein LptA	66	02000	Transporters [BR:ko02000],	09183	09180
D|1136176.5.peg.329	1	367771	368334	-	564	2268	2189	2140.5	2028.5	2379	2345.5	910.5	964	1068.5	931.5	901.5	872	1528.34	1531.69	1510.56	1495.5	1572.99	1531.11	1378.12	1348.43	1404.01	1427.6	1275.37	1305.58	1442.44	0.172367	0.0360887	4.77619	1.79e-06	3.97e-06	Uncharacterized protein YrbK clustered with lipopolysaccharide transporters	NA	K11719	lptC; lipopolysaccharide export system protein LptC	52	02000	Transporters [BR:ko02000],	09183	09180
D|1136176.5.peg.330	1	368331	368888	-	558	2619	2432.5	2395	2310.5	2567	2487	1216.5	1304.5	1372.5	1302	1218	1173	1764.87	1701.72	1690.55	1703.46	1697.3	1623.83	1841.53	1824.02	1803.65	1996.49	1724.08	1756.25	1760.65	-0.103973	0.0403024	-2.57982	0.00988516	0.0146885	3-deoxy-D-manno-octulosonate 8-phosphate phosphatase (EC 3.1.3.45)	KEGG_ENZYME:3.1.3.45	K03270	kdsC; 3-deoxy-D-manno-octulosonate 8-phosphate phosphatase (KDO 8-P phosphatase) [EC:3.1.3.45]	131	00540 01005	Lipopolysaccharide biosynthesis [PATH:ko00540], Lipopolysaccharide biosynthesis proteins [BR:ko01005],	09107 09181	09100 09180
D|1136176.5.peg.331	1	368888	369859	-	972	5966	5480	5471	5442.5	5947	5973	2472.5	2442	2689.5	2491	2571.5	2545.5	4020.32	3834.47	3861.8	4013.08	3932.15	3899.93	3743.63	3415.84	3535	3819.71	3639.25	3810.44	3793.8	0.101862	0.0341488	2.98289	0.00285542	0.004544	Arabinose 5-phosphate isomerase (EC 5.3.1.13)	KEGG_ENZYME:5.3.1.13	K06041	kdsD, kpsF; arabinose-5-phosphate isomerase [EC:5.3.1.13]	217	00540 01005	Lipopolysaccharide biosynthesis [PATH:ko00540], Lipopolysaccharide biosynthesis proteins [BR:ko01005],	09107 09181	09100 09180
D|1136176.5.peg.332	1	369894	370859	-	966	1215	1152	1106	1042	1230	1223	502	499	562	519	512	525	818.754	806.078	780.69	768.399	813.274	798.53	760.236	697.995	738.813	795.837	724.736	786.043	774.115	0.0894373	0.0444834	2.01058	0.0443703	0.0600312	Inner membrane protein YrbG%2C predicted calcium/sodium:proton antiporter	NA	K07301	yrbG; cation:H+ antiporter	257	02000	Transporters [BR:ko02000],	09183	09180
D|1136176.5.peg.333	1	371124	371918	+	795	4066.5	3575	3544.5	3531	3677.5	3867	1114	904	1011	1026	865.5	894.5	2739.96	2501.5	2501.6	2603.86	2431.23	2524.87	1687.06	1264.5	1329.08	1573.27	1224.41	1338.52	1976.65	0.863151	0.0783897	11.011	3.38e-28	2.43e-27	Uncharacterized ABC transporter%2C ATP-binding protein YrbF	NA	K02065	mlaF, linL, mkl; phospholipid/cholesterol/gamma-HCH transport system ATP-binding protein	189	02010 02000	ABC transporters [PATH:ko02010], Transporters [BR:ko02000],	09131 09183	09130 09180
D|1136176.5.peg.334	1	371920	372699	+	780	5719.5	4838	4874.5	5103.5	5044	5220.5	1682.5	1405.5	1521	1582	1290	1271.5	3853.87	3385.25	3440.4	3763.09	3335.08	3408.28	2547.25	1965.3	1999.53	2425.85	1825.99	1902.97	2821.07	0.742391	0.087569	8.47779	2.3e-17	1.05e-16	Uncharacterized ABC transporter%2C permease component YrbE	NA	K02066	mlaE, linK; phospholipid/cholesterol/gamma-HCH transport system permease protein	268	02010 02000	ABC transporters [PATH:ko02010], Transporters [BR:ko02000],	09131 09183	09130 09180
D|1136176.5.peg.335	1	372702	373193	+	492	4866.5	4113	4110.5	4111.5	4269.5	4306	1111	1092.5	1203	1199	1064.5	1097	3279.06	2877.95	2901.12	3031.56	2822.66	2811.5	1682.52	1527.48	1581.48	1838.55	1506.09	1642.46	2291.87	0.85859	0.0592424	14.4928	1.34e-47	1.93e-46	Uncharacterized ABC transporter%2C periplasmic component YrbD	NA	K02067	mlaD, linM; phospholipid/cholesterol/gamma-HCH transport system substrate-binding protein	116	02010 02000	ABC transporters [PATH:ko02010], Transporters [BR:ko02000],	09131 09183	09130 09180
D|1136176.5.peg.336	1	373198	373875	+	678	10647.5	9251	9161.5	8941	9769.5	9848.5	2319	2397	2247	2440	2177.5	2164.5	7174.71	6473.12	6466.46	6593.34	6459.25	6430.03	3511.93	3352.89	2953.94	3741.51	3081.54	3240	4956.56	0.99436	0.0592389	16.7856	3.11e-63	6.85e-62	Uncharacterized ABC transporter%2C auxiliary component YrbC	NA	K07323	mlaC; phospholipid transport system substrate-binding protein	80	02010 02000	ABC transporters [PATH:ko02010], Transporters [BR:ko02000],	09131 09183	09130 09180
D|1136176.5.peg.337	1	373875	374183	+	309	4105.5	3347.5	3444.5	3715.5	3708	3778	1394	1443	1380.5	1493.5	1311	1216	2766.24	2341.96	2431.01	2739.54	2451.72	2466.76	2111.09	2018.45	1814.17	2289.37	1855.72	1820.63	2258.89	0.352089	0.0707411	4.97715	6.45e-07	1.51e-06	Uncharacterized protein YrbB	NA	K07122	mlaB; phospholipid transport system transporter-binding protein	22	02010 02000	ABC transporters [PATH:ko02010], Transporters [BR:ko02000],	09131 09183	09130 09180
D|1136176.5.peg.338	1	374197	374451	+	255	1854	1615	1615	1806.5	1747.5	1815	488	507	481	510	506	508.5	1249.36	1130.05	1139.98	1331.79	1155.11	1185.06	739.035	709.185	632.329	782.036	716.243	760.591	960.898	0.730096	0.0627802	11.6294	2.92e-31	2.35e-30	YrbA protein	NA			60
D|1136176.5.peg.339	1	374460	375725	+	1266	5011.5	4340.5	4200.5	4426	4504	4706	1470.5	1355	1579.5	1577.5	1393.5	1493	3376.77	3036.79	2964.65	3263.85	2978.04	3072.67	2226.19	1895.36	2075.78	2418.18	1971.79	2235.36	2626.28	0.544283	0.0637865	8.53289	1.43e-17	6.58e-17	UDP-N-acetylglucosamine 1-carboxyvinyltransferase (EC 2.5.1.7)	KEGG_ENZYME:2.5.1.7	K00790	murA; UDP-N-acetylglucosamine 1-carboxyvinyltransferase [EC:2.5.1.7]	344	00520 00550 01011	Amino sugar and nucleotide sugar metabolism [PATH:ko00520], Peptidoglycan biosynthesis [PATH:ko00550], Peptidoglycan biosynthesis and degradation proteins [BR:ko01011],	09101 09107 09181	09100 09180
D|1136176.5.peg.340	1	375875	376600	+	726	618	587	526	529	548	578	171	174	193	187	140	154	416.452	410.736	371.287	390.099	362.337	377.392	258.965	243.389	253.721	286.747	198.17	230.573	316.656	0.663244	0.0782804	8.47268	2.4e-17	1.09e-16	1-acyl-sn-glycerol-3-phosphate acyltransferase (EC 2.3.1.51)	KEGG_ENZYME:2.3.1.51	K00655	plsC; 1-acyl-sn-glycerol-3-phosphate acyltransferase [EC:2.3.1.51]	201	00561 00564 01004	Glycerolipid metabolism [PATH:ko00561], Glycerophospholipid metabolism [PATH:ko00564], Lipid biosynthesis proteins [BR:ko01004],	09103 09181	09100 09180
D|1136176.5.peg.341	1	376727	377116	-	390	153	149	156	158	150	161	77	103	113	72	112	128	103.102	104.258	110.115	116.514	99.1797	105.121	116.61	144.075	148.551	110.405	158.536	191.645	125.676	-0.449359	0.114741	-3.91628	8.99e-05	0.00017	Endoribonuclease L-PSP	NA	K09022	ridA, tdcF, RIDA; 2-iminobutanoate/2-iminopropanoate deaminase [EC:3.5.99.10]	129	99980	Enzymes with EC numbers,	09191	09190
D|1136176.5.peg.342	1	377253	377714	-	462	34	28	28	38	35	41	17	23	20	21	27	17	22.9116	19.5922	19.7643	28.0222	23.1419	26.77	25.7451	32.1721	26.2923	32.2015	38.2185	25.4528	26.6904	-0.361864	0.184538	-1.96091	0.0498894	0.0668359	Aspartate carbamoyltransferase regulatory chain (PyrI)	NA	K00610	pyrI; aspartate carbamoyltransferase regulatory subunit	110	00240 00250	Pyrimidine metabolism [PATH:ko00240], Alanine, aspartate and glutamate metabolism [PATH:ko00250],	09104 09105	09100
D|1136176.5.peg.343	1	377727	378656	-	930	60	50	58	54	70	45	41	54	31	37	41	30	40.4323	34.986	40.9404	39.8211	46.2839	29.3817	62.091	75.5345	40.753	56.736	58.0355	44.9168	47.4927	-0.542963	0.159446	-3.4053	0.000661	0.0011439	Aspartate carbamoyltransferase (EC 2.1.3.2)	KEGG_ENZYME:2.1.3.2	K00609	pyrB, PYR2; aspartate carbamoyltransferase catalytic subunit [EC:2.1.3.2]	260	00240 00250	Pyrimidine metabolism [PATH:ko00240], Alanine, aspartate and glutamate metabolism [PATH:ko00250],	09104 09105	09100
D|1136176.5.peg.344	1	378715	378849	-	135	45	40	46	53	43	37	6	3	4	8	0	3	30.3242	27.9888	32.4699	39.0837	28.4315	24.1583	9.08649	4.19636	5.25846	12.2672	0	4.49168	18.1464	2.39249	0.328016	7.29382	3.01e-13	1.07e-12	D01203080: hypothetical protein	NA			NA
D|1136176.5.peg.345	1	378944	379948	-	1005	200	189	205	223	191	210	134	134	134	99	185	132	134.774	132.247	144.703	164.446	126.289	137.115	202.932	187.438	176.158	151.807	261.867	197.634	168.117	-0.490235	0.115716	-4.23654	2.27e-05	4.58e-05	Ornithine carbamoyltransferase (EC 2.1.3.3)	KEGG_ENZYME:2.1.3.3	K00611	OTC, argF, argI; ornithine carbamoyltransferase [EC:2.1.3.3]	390	00220	Arginine biosynthesis [PATH:ko00220],	09105	09100
D|1136176.5.peg.346	1	380104	381324	-	1221	3997	4083	4321	3872	4525	4287	3699	3847	3817	3012	3741	3317	2693.46	2856.96	3050.06	2855.32	2991.92	2799.1	5601.82	5381.14	5017.88	4618.61	5295.38	4966.3	4010.66	-0.840477	0.0523958	-16.0409	6.61e-58	1.25e-56	Arginine deiminase (EC 3.5.3.6)	KEGG_ENZYME:3.5.3.6	K01478	arcA; arginine deiminase [EC:3.5.3.6]	400	00220	Arginine biosynthesis [PATH:ko00220],	09105	09100
D|1136176.5.peg.347	1	381698	381820	+	123	39	33	31	30	27	51	29	37	51	20	39	28	26.281	23.0908	21.8819	22.1228	17.8524	33.2993	43.918	51.7551	67.0453	30.6681	55.2045	41.9223	36.2535	-1.01423	0.191349	-5.30042	1.16e-07	2.85e-07	hypothetical protein	NA			NA
D|1136176.5.peg.348	1	381902	382318	+	417	160	158	136	148	190	181	110	131	129	91	138	115	107.819	110.556	95.9981	109.139	125.628	118.18	166.586	183.241	169.585	139.54	195.339	172.181	141.149	-0.621988	0.0952565	-6.52962	6.59e-11	2.01e-10	Ribonuclease E inhibitor RraB	NA	K09893	rraB; regulator of ribonuclease activity B	61	03019	Messenger RNA biogenesis [BR:ko03019],	09182	09180
D|1136176.5.peg.349	1	382443	383237	+	795	188	159.5	176	151.5	192.5	168.5	143	159	157	118.5	144.5	121.5	126.688	111.256	124.233	111.352	126.95	109.692	216.561	222.407	206.394	180.942	203.832	181.164	160.123	-0.771551	0.0853174	-9.04331	1.52e-19	7.78e-19	Beta-galactosidase/beta-glucuronidase	NA			NA
D|1136176.5.peg.350	1	383263	383757	-	495	462	450.5	437	459.5	519.5	530.5	261	308	327	295.5	320.5	274.5	311.329	314.874	308.464	338.479	343.162	346.051	395.262	430.827	429.879	452.354	452.96	410.24	377.823	-0.390116	0.060228	-6.47731	9.34e-11	2.82e-10	Histone acetyltransferase HPA2	NA	K03828	yjgM; putative acetyltransferase [EC:2.3.1.-]	76	99980	Enzymes with EC numbers,	09191	09190
D|1136176.5.peg.351	1	383807	384211	-	405	181	168	181	175	178	184	57	41	53	44	58	53	121.971	117.553	127.762	129.05	117.693	120.139	86.3217	57.3503	69.6746	67.4698	82.099	79.353	98.0363	0.733418	0.107175	6.84319	7.74e-12	2.5e-11	Arginine/ornithine antiporter ArcD	NA			12
D|1136176.5.peg.352	1	384428	387301	-	2874	5863	5947	5660	5243	6089	6018	2291	2540	2924	2049	2654	2705	3950.91	4161.24	3995.21	3866.33	4026.04	3929.31	3469.53	3552.92	3843.93	3141.95	3756.74	4050	3812.01	0.133216	0.0568684	2.34253	0.0191536	0.0273993	Valyl-tRNA synthetase (EC 6.1.1.9)	KEGG_ENZYME:6.1.1.9	K01873	VARS, valS; valyl-tRNA synthetase [EC:6.1.1.9]	801	00970 01007 03016	Aminoacyl-tRNA biosynthesis [PATH:ko00970], Amino acid related enzymes [BR:ko01007], Transfer RNA biogenesis [BR:ko03016],	09122 09181 09182	09120 09180
D|1136176.5.peg.353	1	387404	387853	-	450	433	399	378	409	434	420	133	150	136	131	137	99	291.786	279.189	266.818	301.608	286.96	274.229	201.417	209.818	178.788	200.876	193.923	148.225	236.136	0.58554	0.0777457	7.53148	5.02e-14	1.86e-13	DNA polymerase III chi subunit (EC 2.7.7.7)	KEGG_ENZYME:2.7.7.7	K02339	holC; DNA polymerase III subunit chi [EC:2.7.7.7]	58	03030 03430 03440 03032 03400	DNA replication [PATH:ko03030], Mismatch repair [PATH:ko03430], Homologous recombination [PATH:ko03440], DNA replication proteins [BR:ko03032], DNA repair and recombination proteins [BR:ko03400],	09124 09182	09120 09180
D|1136176.5.peg.354	1	387953	389473	-	1521	695	738	726	614	751	737	239	275	322	227	314	276	468.341	516.394	512.46	452.78	496.56	481.207	361.945	384.667	423.306	348.083	444.467	413.234	441.954	0.29951	0.0670599	4.4663	7.96e-06	1.67e-05	Cytosol aminopeptidase PepA (EC 3.4.11.1)	KEGG_ENZYME:3.4.11.1	K01255	CARP, pepA; leucyl aminopeptidase [EC:3.4.11.1]	622	00480 01002	Glutathione metabolism [PATH:ko00480], Peptidases and inhibitors [BR:ko01002],	09106 09181	09100 09180
D|1136176.5.peg.355	1	389666	390766	+	1101	1040	1011.5	1003	964.5	1059	1109.5	544.5	546.5	510.5	456.5	493	505.5	700.826	707.418	707.986	710.88	700.209	724.096	823.842	763.738	670.453	699.232	697.841	756.099	721.885	-0.0518837	0.0508245	-1.02084	0.30733	0.354089	D000988: Predicted permease	NA	K07091	lptF; lipopolysaccharide export system permease protein	191	02010 02000	ABC transporters [PATH:ko02010], Transporters [BR:ko02000],	09131 09183	09130 09180
D|1136176.5.peg.356	1	390770	391840	+	1071	889	823.5	852	762.5	883	925.5	501.5	477.5	565.5	495.5	564	526.5	599.072	575.87	601.4	561.92	583.838	603.957	758.722	667.222	742.757	759.035	798.342	787.541	669.973	-0.355129	0.0500843	-7.09063	1.34e-12	4.52e-12	D000906: Predicted Permease	NA	K11720	lptG; lipopolysaccharide export system permease protein	221	02010 02000	ABC transporters [PATH:ko02010], Transporters [BR:ko02000],	09131 09183	09130 09180
D|1136176.5.peg.357	1	391905	392381	-	477	181	179	157	136	180	173	62	56	78	67	107	56	121.971	125.25	110.821	100.29	119.016	112.956	93.8937	78.3321	102.54	102.738	151.458	83.8446	108.593	0.171032	0.132164	1.2941	0.195632	0.236245	D023103: Predicted transmembrane protein	NA			55
D|1136176.5.peg.358	1	393136	393543	+	408	1095	988	1029	1061	1141	1090	714	666	723	715	691	710	737.889	691.324	726.338	782.41	754.427	711.69	1081.29	931.592	950.466	1096.38	978.11	1063.03	875.413	-0.468975	0.0548922	-8.54356	1.3e-17	6.02e-17	PhnB protein%3B putative DNA binding 3-demethylubiquinone-9 3-methyltransferase domain protein	NA	K04750	phnB; PhnB protein	60	99996	General function prediction only,	09194	09190
D|1136176.5.peg.359	1	393627	394880	+	1254	633	605	567	564	689	665	365	407	414	361	345	390	426.561	423.331	400.227	415.909	455.566	434.196	552.762	569.306	544.25	553.559	488.347	583.918	487.328	-0.363946	0.0559836	-6.50094	7.98e-11	2.42e-10	D00919795: hypothetical protein	NA			196
D|1136176.5.peg.360	1	397449	397562	+	114	74	244	182	111	166	204	253	398	342	189	304	307	49.8665	170.732	128.468	81.8544	109.759	133.197	383.147	556.717	449.598	289.813	430.312	459.648	270.259	-1.93109	0.234369	-8.23951	1.73e-16	7.44e-16	hypothetical protein	NA			NA
D|1136176.5.peg.361	1	407766	408173	+	408	1815	1726	1657	1559	1788	1831	982	1058	1046	1059	903	911	1223.08	1207.72	1169.62	1149.65	1182.22	1195.51	1487.16	1479.92	1375.09	1623.88	1278.2	1363.97	1311.33	-0.27145	0.054585	-4.97298	6.59e-07	1.54e-06	D01204690: hypothetical protein	NA			27
D|1136176.5.peg.362	1	409280	410905	-	1626	428	427	443	454	481	481	253	302	252	218	248	240	288.417	298.781	312.7	334.792	318.036	314.058	383.147	422.434	331.283	334.282	351.044	359.334	337.359	-0.225066	0.0699059	-3.21955	0.00128392	0.00214309	N-acetylglucosamine regulated methyl-accepting chemotaxis protein	NA	K03406	mcp; methyl-accepting chemotaxis protein	235	02020 02030 02035	Two-component system [PATH:ko02020], Bacterial chemotaxis [PATH:ko02030], Bacterial motility proteins [BR:ko02035],	09132 09142 09183	09130 09140 09180
D|1136176.5.peg.363	1	412196	413329	-	1134	223	198	227	176	257	208	152	151	144	113	141	106	150.273	138.545	160.232	129.787	169.928	135.809	230.191	211.217	189.304	173.275	199.585	158.706	170.571	-0.393689	0.101374	-3.88351	0.000103	0.000194	Membrane-bound lytic murein transglycosylase C precursor (EC 3.2.1.-)	KEGG_ENZYME:3.2.1.-	K08306	mltC; membrane-bound lytic murein transglycosylase C [EC:4.2.2.-]	214	01011	Peptidoglycan biosynthesis and degradation proteins [BR:ko01011],	09181	09180
D|1136176.5.peg.364	1	413399	413671	-	273	113	94.5	116	116	109	117	73	40	53	46	66	46	76.1475	65.7737	81.8807	85.5416	72.0706	76.3925	110.552	55.9515	69.6746	70.5366	93.423	68.8724	77.2347	-0.0324257	0.138929	-0.233397	0.815453	0.842496	D001341: Probable Fe(2+)-trafficking protein YggX	NA			78
D|1136176.5.peg.365	1	413700	414761	-	1062	105	101.5	118	114	139	106	82	92	88	61	68	70	70.7565	70.6718	83.2924	84.0667	91.9066	69.2103	124.182	128.688	115.686	93.5377	96.254	104.806	94.4215	-0.499569	0.115093	-4.34056	1.42e-05	2.92e-05	A/G-specific adenine glycosylase (EC 3.2.2.-)	KEGG_ENZYME:3.2.2.-	K03575	mutY; A/G-specific adenine glycosylase [EC:3.2.2.31]	217	03410 03400	Base excision repair [PATH:ko03410], DNA repair and recombination proteins [BR:ko03400],	09124 09182	09120 09180
D|1136176.5.peg.366	1	414927	415646	+	720	7022	6618	6816	6405	7094	6999	3306	3483	3548	3689	3445	3202	4731.92	4630.75	4811.2	4723.22	4690.54	4569.84	5006.66	4871.98	4664.25	5656.73	4876.4	4794.12	4835.63	-0.0848935	0.0458474	-1.85165	0.0640757	0.0843322	tRNA (guanine46-N7-)-methyltransferase (EC 2.1.1.33)	KEGG_ENZYME:2.1.1.33	K03439	trmB, METTL1, TRM8; tRNA (guanine-N7-)-methyltransferase [EC:2.1.1.33]	187	03016	Transfer RNA biogenesis [BR:ko03016],	09182	09180
D|1136176.5.peg.367	1	415830	416750	+	921	1038	950	989	899	1009	1001	386	381	420	389	387	391	699.478	664.735	698.104	662.947	667.149	653.58	584.564	532.938	552.138	596.494	547.798	585.415	620.445	0.252805	0.0477104	5.29874	1.17e-07	2.88e-07	Glutaminase (EC 3.5.1.2)	KEGG_ENZYME:3.5.1.2	K01425	glsA, GLS; glutaminase [EC:3.5.1.2]	291	00250 00220 00471 02020 04964 04724 04727 05206 05230	Alanine, aspartate and glutamate metabolism [PATH:ko00250], Arginine biosynthesis [PATH:ko00220], D-Glutamine and D-glutamate metabolism [PATH:ko00471], Two-component system [PATH:ko02020], Proximal tubule bicarbonate reclamation [PATH:ko04964], Glutamatergic synapse [PATH:ko04724], GABAergic synapse [PATH:ko04727], MicroRNAs in cancer [PATH:ko05206], Central carbon metabolism in cancer [PATH:ko0…	09105 09106 09132 09155 09156 09161	09100 09130 09150 09160
D|1136176.5.peg.368	1	417067	418254	-	1188	1504	1367.5	1476.5	1267.5	1482	1493.5	1098	1001	1004.5	1134.5	866.5	943.5	1013.5	956.518	1041.86	934.321	979.896	974.82	1662.83	1400.19	1319.87	1738.88	1225.82	1411.88	1221.7	-0.569137	0.0827068	-6.88138	5.93e-12	1.93e-11	Radical SAM family enzyme%2C similar to coproporphyrinogen III oxidase%2C oxygen-independent%2C clustered with nucleoside-triphosphatase RdgB	NA			261
D|1136176.5.peg.369	1	418254	418853	-	600	2054	2028.5	1903.5	1715.5	1969	2014.5	1336	1246	1264.5	1420.5	1144.5	1154.5	1384.13	1419.03	1343.27	1264.69	1301.9	1315	2023.26	1742.89	1661.67	2177.43	1619.33	1727.8	1581.7	-0.447491	0.0754137	-5.93382	2.96e-09	8.2e-09	Nucleoside 5-triphosphatase RdgB (dHAPTP%2C dITP%2C XTP-specific) (EC 3.6.1.15)	KEGG_ENZYME:3.6.1.15	K02428	rdgB; XTP/dITP diphosphohydrolase [EC:3.6.1.66]	159	00230	Purine metabolism [PATH:ko00230],	09104	09100
D|1136176.5.peg.370	1	418902	419333	-	432	2428	2259	2269.5	2236	2410	2409	1883	2052.5	2017	2200.5	1675	1621.5	1636.16	1580.67	1601.61	1648.89	1593.49	1572.9	2851.64	2870.31	2651.58	3373.49	2370.96	2427	2181.56	-0.780033	0.0782821	-9.96438	2.18e-23	1.3e-22	D003551: hypothetical protein	NA			71
D|1136176.5.peg.371	1	419364	419654	-	291	2135	1983	1927.5	1909	2085	2001	813	774.5	724	806.5	646	637.5	1438.72	1387.55	1360.21	1407.75	1378.6	1306.51	1231.22	1082.66	951.781	1235.92	914.413	953.733	1220.75	0.379108	0.0799409	4.74235	2.11e-06	4.66e-06	COG1872	NA	K09131	K09131; uncharacterized protein	69	99997	Function unknown,	09194	09190
D|1136176.5.peg.372	1	419684	420241	-	558	591	666	654	564	659	662	234	324	372	282	304	265	398.258	466.014	461.638	415.909	435.73	432.238	354.373	453.207	489.037	432.42	430.312	396.765	430.492	0.0275984	0.0752864	0.366579	0.713933	0.753792	Integral membrane protein YggT%2C involved in response to extracytoplasmic stress (osmotic shock)	NA	K02221	yggT; YggT family protein	166	02044	Secretion system [BR:ko02044],	09183	09180
D|1136176.5.peg.373	1	420318	421136	-	819	1033	883	916	943	991	1013	416	456	448	412	406	356	696.109	617.853	646.575	695.394	655.247	661.415	629.997	637.847	588.947	631.763	574.693	533.012	630.738	0.143737	0.0561006	2.56214	0.010403	0.0154234	Pyrroline-5-carboxylate reductase (EC 1.5.1.2)	KEGG_ENZYME:1.5.1.2	K00286	proC; pyrroline-5-carboxylate reductase [EC:1.5.1.2]	191	00330	Arginine and proline metabolism [PATH:ko00330],	09105	09100
D|1136176.5.peg.374	1	421249	421953	-	705	981.5	905.5	932.5	893.5	1019.5	971	463.5	415	438	473	359	395	661.068	633.247	657.869	658.523	673.761	633.992	701.174	580.497	575.801	725.3	508.164	591.404	633.4	0.0913196	0.0775997	1.1768	0.239274	0.28248	Hypothetical protein YggS%2C proline synthase co-transcribed bacterial homolog PROSC	NA	K06997	yggS, PROSC; PLP dependent protein	149	99985	Amino acid metabolism,	09191	09190
D|1136176.5.peg.375	1	421980	423017	+	1038	1155.5	1071.5	1087	1030.5	1077.5	1128	569	561.5	638.5	543.5	604.5	559.5	778.321	749.401	767.279	759.55	712.11	736.502	861.702	784.72	838.724	832.639	854.962	836.949	792.738	-0.153805	0.0430355	-3.57391	0.000352	0.000626	Twitching motility protein PilT	NA	K02669	pilT; twitching motility protein PilT	267	02044 02035	Secretion system [BR:ko02044], Bacterial motility proteins [BR:ko02035],	09183	09180
D|1136176.5.peg.376	1	423032	424141	+	1110	1977	1655	1674.5	2067	1742	1816	590.5	548.5	534.5	601.5	445.5	487.5	1332.24	1158.04	1181.62	1524.26	1151.81	1185.72	893.505	766.535	702.004	921.576	629.897	729.149	1014.7	0.699058	0.104656	6.67958	2.4e-11	7.56e-11	Twitching motility protein PilT	NA	K02670	pilU; twitching motility protein PilU	241	02044 02035	Secretion system [BR:ko02044], Bacterial motility proteins [BR:ko02035],	09183	09180
D|1136176.5.peg.377	1	424198	424359	-	162	32891	25208	27241	35489	28002	28110	4824	4007	2374	7177	1867	3735	22164.3	17638.6	19228.6	26170.6	18514.9	18353.8	7305.54	5604.94	3120.89	11005.2	2642.74	5592.14	13111.8	1.79119	0.319952	5.5983	2.16e-08	5.64e-08	hypothetical protein	NA			2
D|1136176.5.peg.378	1	424458	424880	-	423	1101	1048	1112	1060	1142	1162	656	778	794	737	751	656	741.932	733.307	784.925	781.673	755.088	758.701	993.456	1088.26	1043.8	1130.12	1063.04	982.18	904.707	-0.468278	0.0446329	-10.4917	9.43e-26	6.21e-25	Putative Holliday junction resolvase YqgF	NA	K07447	ruvX; putative holliday junction resolvase [EC:3.1.-.-]	105	99980	Enzymes with EC numbers,	09191	09190
D|1136176.5.peg.379	1	424929	425492	-	564	2115	1921	1949	1965	2134	2161	1049	1210	1115	1198	1016	1032	1425.24	1344.16	1375.74	1449.04	1411	1410.98	1588.62	1692.53	1465.79	1837.02	1438.15	1545.14	1498.62	-0.184316	0.0593173	-3.10729	0.00188809	0.00306773	UPF0301 protein YqgE	NA	K07735	algH; putative transcriptional regulator	165	03000	Transcription factors [BR:ko03000],	09182	09180
D|1136176.5.peg.380	1	425609	426559	-	951	1822.5	1670.5	1743	1637	1785.5	1791.5	603	655	628	573.5	532	509	1227.79	1168.53	1230.33	1207.17	1180.24	1169.39	913.192	916.206	825.578	878.641	753.046	762.088	1019.35	0.509044	0.0543206	9.37112	7.18e-21	3.92e-20	Glutathione synthetase (EC 6.3.2.3)	KEGG_ENZYME:6.3.2.3	K01920	gshB; glutathione synthase [EC:6.3.2.3]	267	00270 00480	Cysteine and methionine metabolism [PATH:ko00270], Glutathione metabolism [PATH:ko00480],	09105 09106	09100
D|1136176.5.peg.381	1	426569	427300	-	732	572.5	526.5	522	527	557.5	579.5	171	187	158	177.5	153	171	385.454	368.053	368.463	388.624	368.287	378.045	258.965	261.573	207.709	271.413	216.571	256.026	310.765	0.620299	0.0683317	9.07777	1.11e-19	5.7e-19	Ribosomal RNA small subunit methyltransferase E (EC 2.1.1.-)	KEGG_ENZYME:2.1.1.-	K09761	rsmE; 16S rRNA (uracil1498-N3)-methyltransferase [EC:2.1.1.193]	180	03009	Ribosome biogenesis [BR:ko03009],	09182	09180
D|1136176.5.peg.382	1	427445	428176	-	732	252	232	256	238	250	217	94	102	94	84	91	88	169.816	162.335	180.702	175.508	165.3	141.685	142.355	142.676	123.574	128.806	128.81	131.756	149.444	0.318356	0.0905834	3.5145	0.000441	0.000777	Endonuclease I precursor (EC 3.1.21.1) @ Extracellular deoxyribonuclease Dns (EC 3.1.21.-)	KEGG_ENZYME:3.1.21.1,KEGG_ENZYME:3.1.21.-	K01150	endA; deoxyribonuclease I [EC:3.1.21.1]	136	99980	Enzymes with EC numbers,	09191	09190
D|1136176.5.peg.383	1	428273	428788	-	516	88	80	94	90	93	79	54	33	51	56	43	53	59.3007	55.9777	66.3516	66.3685	61.4914	51.5812	81.7784	46.16	67.0453	85.8707	60.8665	79.353	65.1787	-0.216776	0.13606	-1.59324	0.111106	0.140724	Protein sprT	NA	K02742	sprT; SprT protein	76	99996	General function prediction only,	09194	09190
D|1136176.5.peg.384	1	428853	429650	-	798	26562	25040	27986	26368	29620	28554	12596	12563	14131	14723	11955	13122	17899.4	17521	19754.4	19444.5	19584.7	18643.7	19075.6	17573	18576.8	22576.3	16922.3	19646.6	18934.9	-0.0192905	0.0688091	-0.280348	0.779211	0.810826	Putative cytochrome c oxidase%2C subunit I	NA			127
D|1136176.5.peg.385	1	430020	431174	-	1155	773	702	723	659	746	790	454	462	477	451	433	430	520.903	491.204	510.343	485.965	493.254	515.812	687.544	646.24	627.071	691.565	612.911	643.807	577.218	-0.371598	0.0487272	-7.6261	2.42e-14	9.15e-14	S-adenosylmethionine synthetase (EC 2.5.1.6)	KEGG_ENZYME:2.5.1.6	K00789	metK; S-adenosylmethionine synthetase [EC:2.5.1.6]	344	00270	Cysteine and methionine metabolism [PATH:ko00270],	09105	09100
D|1136176.5.peg.386	1	431564	433558	+	1995	2907	2514	2430	2476	2490	2648	863	840	829	692	780	729	1958.94	1759.1	1715.26	1825.87	1646.38	1728.95	1306.94	1174.98	1089.82	1061.12	1104.09	1091.48	1455.24	0.639329	0.0616498	10.3703	3.38e-25	2.18e-24	Transketolase (EC 2.2.1.1)	KEGG_ENZYME:2.2.1.1	K00615	E2.2.1.1, tktA, tktB; transketolase [EC:2.2.1.1]	566	00030 00710 01051	Pentose phosphate pathway [PATH:ko00030], Carbon fixation in photosynthetic organisms [PATH:ko00710], Biosynthesis of ansamycins [PATH:ko01051],	09101 09102 09109	09100
D|1136176.5.peg.387	1	433773	434822	+	1050	2933	2757	2962	2860	3053	3153	1352	1363	1416	1354	1322	1312	1976.46	1929.13	2090.78	2109.04	2018.64	2058.68	2047.49	1906.55	1861.49	2076.23	1871.29	1964.36	1992.51	0.0556982	0.0405739	1.37276	0.169827	0.2074	D-erythrose-4-phosphate dehydrogenase (EC 1.2.1.72)	KEGG_ENZYME:1.2.1.72	K03472	epd; D-erythrose 4-phosphate dehydrogenase [EC:1.2.1.72]	254	00750	Vitamin B6 metabolism [PATH:ko00750],	09108	09100
D|1136176.5.peg.388	1	434989	436152	+	1164	3337	3340	3191	2967	3399	3488	971	1165	1489	911	1295	1186	2248.71	2337.07	2252.43	2187.95	2247.41	2277.41	1470.5	1629.59	1957.46	1396.93	1833.07	1775.71	1967.85	0.428608	0.0769745	5.56818	2.57e-08	6.67e-08	Phosphoglycerate kinase (EC 2.7.2.3)	KEGG_ENZYME:2.7.2.3	K00927	PGK, pgk; phosphoglycerate kinase [EC:2.7.2.3]	471	00010 00710 04066 04147	Glycolysis / Gluconeogenesis [PATH:ko00010], Carbon fixation in photosynthetic organisms [PATH:ko00710], HIF-1 signaling pathway [PATH:ko04066], Exosome [BR:ko04147],	09101 09102 09132 09183	09100 09130 09180
D|1136176.5.peg.389	1	436308	437384	+	1077	4134	4213	4079	3840	4352	4355	2747	2688	2924	2466	2668	2648	2785.78	2947.92	2879.24	2831.72	2877.53	2843.5	4160.1	3759.94	3843.93	3781.38	3776.55	3964.65	3371.02	-0.439705	0.0324352	-13.5564	7.26e-42	8.64e-41	Fructose-bisphosphate aldolase class II (EC 4.1.2.13)	KEGG_ENZYME:4.1.2.13	K01624	FBA, fbaA; fructose-bisphosphate aldolase, class II [EC:4.1.2.13]	338	00010 00030 00051 00710 00680	Glycolysis / Gluconeogenesis [PATH:ko00010], Pentose phosphate pathway [PATH:ko00030], Fructose and mannose metabolism [PATH:ko00051], Carbon fixation in photosynthetic organisms [PATH:ko00710], Methane metabolism [PATH:ko00680],	09101 09102	09100
D|1136176.5.peg.390	1	437761	438627	+	867	1339	1321	1290	1130	1407	1318	824	784	1077	830	902	1027	902.314	924.331	910.57	833.293	930.306	860.558	1247.88	1096.65	1415.84	1272.73	1276.78	1537.65	1100.74	-0.549527	0.0740382	-7.42221	1.15e-13	4.16e-13	Protein involved in stability of MscS mechanosensitive channel	NA	K03442	mscS; small conductance mechanosensitive channel	228	02000	Transporters [BR:ko02000],	09183	09180
D|1136176.5.peg.391	1	438727	439356	-	630	252	226	193	217	216	223	57	74	58	77	49	65	169.816	158.137	136.233	160.022	142.819	145.603	86.3217	103.51	76.2476	118.072	69.3595	97.3197	121.955	0.733278	0.114225	6.4196	1.37e-10	4.09e-10	Arginine exporter protein ArgO	NA	K06895	lysE, argO; L-lysine exporter family protein LysE/ArgO	101	02000	Transporters [BR:ko02000],	09183	09180
D|1136176.5.peg.392	1	439499	440395	+	897	525	477	506	488	515	497	453	404	431	393	420	429	353.782	333.767	357.169	359.865	340.517	324.505	686.03	565.11	566.599	602.628	594.51	642.31	477.233	-0.820251	0.0605298	-13.5512	7.8e-42	9.26e-41	Chromosome initiation inhibitor	NA	K05596	iciA; LysR family transcriptional regulator, chromosome initiation inhibitor	165	03000 03036	Transcription factors [BR:ko03000], Chromosome and associated proteins [BR:ko03036],	09182	09180
D|1136176.5.peg.393	1	440506	441219	+	714	2698	2423	2204	2196	2472	2432	1084	1100	1129	1216	1092	1113	1818.1	1695.42	1555.73	1619.39	1634.48	1587.92	1641.63	1538.67	1484.2	1864.62	1545.73	1666.41	1637.69	0.025753	0.0618931	0.416088	0.677346	0.719835	Protein of unknown function DUF541	NA	K09807	K09807; uncharacterized protein	122	99997	Function unknown,	09194	09190
D|1136176.5.peg.394	1	441339	442568	-	1230	511	444	461	479	485	546	291	236	304	239	232	244	344.348	310.676	325.405	353.228	320.681	356.498	440.695	330.114	399.643	366.484	328.396	365.323	353.458	-0.149026	0.0768181	-1.93999	0.0523811	0.0698716	D-3-phosphoglycerate dehydrogenase (EC 1.1.1.95)	KEGG_ENZYME:1.1.1.95	K00058	serA, PHGDH; D-3-phosphoglycerate dehydrogenase / 2-oxoglutarate reductase [EC:1.1.1.95 1.1.1.399]	321	00680 00260 00270 04147	Methane metabolism [PATH:ko00680], Glycine, serine and threonine metabolism [PATH:ko00260], Cysteine and methionine metabolism [PATH:ko00270], Exosome [BR:ko04147],	09102 09105 09183	09100 09180
D|1136176.5.peg.395	1	442830	443486	-	657	228	196	199	167	202	228	85	105	88	85	113	103	153.643	137.145	140.468	123.15	133.562	148.867	128.725	146.873	115.686	130.339	159.951	154.214	139.385	0.00440277	0.0958679	0.0459254	0.96337	0.970689	Ribose 5-phosphate isomerase A (EC 5.3.1.6)	KEGG_ENZYME:5.3.1.6	K01807	rpiA; ribose 5-phosphate isomerase A [EC:5.3.1.6]	164	00030 00710	Pentose phosphate pathway [PATH:ko00030], Carbon fixation in photosynthetic organisms [PATH:ko00710],	09101 09102	09100
D|1136176.5.peg.396	1	443589	444188	-	600	375	355	351	385	372	385	87	107	109	92	68	88	252.702	248.401	247.76	283.91	245.966	251.377	131.754	149.67	143.293	141.073	96.254	131.756	193.66	0.945482	0.0895704	10.5558	4.78e-26	3.18e-25	5-formyltetrahydrofolate cyclo-ligase (EC 6.3.3.2)	KEGG_ENZYME:6.3.3.2	K01934	MTHFS; 5-formyltetrahydrofolate cyclo-ligase [EC:6.3.3.2]	139	00670	One carbon pool by folate [PATH:ko00670],	09108	09100
D|1136176.5.peg.397	1	444390	444698	-	309	1340	1293	1379	1346	1476	1508	503	634	666	566	621	614	902.988	904.739	973.392	992.577	975.929	984.614	761.751	886.831	875.533	867.907	879.025	919.297	910.382	0.143202	0.0513256	2.79007	0.00526958	0.00810249	Z-ring-associated protein ZapA	NA	K09888	zapA; cell division protein ZapA	38	03036	Chromosome and associated proteins [BR:ko03036],	09182	09180
D|1136176.5.peg.398	1	445008	445583	+	576	901.5	775	827.5	880	926	863	402	383	439	413	414.5	398.5	607.158	542.283	583.753	648.936	612.27	563.476	608.795	535.736	577.116	633.296	586.017	595.896	591.228	0.00936314	0.0597736	0.156643	0.875526	0.894408	D001590: Putative conserved exported protein precursor	NA	K09895	K09895; uncharacterized protein	86	99997	Function unknown,	09194	09190
D|1136176.5.peg.399	1	445608	446786	+	1179	993.5	1010	942	955.5	999.5	992.5	476	490	561	439.5	471	493	669.154	706.718	664.928	704.243	660.537	647.704	720.862	685.406	737.499	673.165	666.7	738.132	689.587	-0.0596418	0.0476046	-1.25286	0.210258	0.251421	2-octaprenyl-6-methoxyphenol hydroxylase (EC 1.14.13.-)	KEGG_ENZYME:1.14.13.-	K03185	ubiH; 2-octaprenyl-6-methoxyphenol hydroxylase [EC:1.14.13.-]	201	00130	Ubiquinone and other terpenoid-quinone biosynthesis [PATH:ko00130],	09108	09100
D|1136176.5.peg.400	1	446799	448022	+	1224	576	545	530.5	492.5	570.5	585.5	276	268	332	242.5	302.5	290.5	388.15	381.348	374.11	362.814	376.883	381.962	417.979	374.875	436.452	371.084	427.481	434.195	393.944	-0.120782	0.0574962	-2.10069	0.0356679	0.0488696	2-octaprenyl-3-methyl-6-methoxy-1%2C4-benzoquinol hydroxylase (EC 1.14.13.-)	KEGG_ENZYME:1.14.13.-	K18800	ubiI; 2-polyprenylphenol 6-hydroxylase [EC:1.14.13.240]	252	00130	Ubiquinone and other terpenoid-quinone biosynthesis [PATH:ko00130],	09108	09100
D|1136176.5.peg.401	1	448143	448349	-	207	4736	4080	4349	3763	4590	5001	6144	6305	6810	7380	6005	5812	3191.45	2854.86	3069.82	2774.94	3034.9	3265.29	9304.57	8819.35	8952.52	11316.5	8500.07	8701.88	6148.85	-1.61154	0.0745801	-21.6082	1.5e-103	7.67e-102	D01199594: hypothetical protein	NA			36
D|1136176.5.peg.402	1	448913	449374	-	462	176	212.5	161.5	176.5	208	190	188.5	182.5	205.5	155.5	176.5	167	118.601	148.341	113.645	129.787	137.529	124.056	284.71	254.579	269.496	237.678	249.128	250.037	193.132	-1.00225	0.0833415	-12.0259	2.6e-33	2.23e-32	Uncharacterized conserved protein	NA	K03976	ybaK, ebsC; Cys-tRNA(Pro)/Cys-tRNA(Cys) deacylase [EC:3.1.1.-]	33	03016	Transfer RNA biogenesis [BR:ko03016],	09182	09180
D|1136176.5.peg.403	1	449379	450350	-	972	627	565.5	602.5	549.5	646	636	388.5	339.5	389.5	285.5	352.5	388	422.517	395.342	424.933	404.848	427.134	415.262	587.593	474.189	511.385	437.02	498.256	580.924	464.95	-0.310413	0.0707452	-4.38775	1.15e-05	2.37e-05	Folate-dependent protein for Fe/S cluster synthesis/repair in oxidative stress	NA	K06980	ygfZ; tRNA-modifying protein YgfZ	185	03016	Transfer RNA biogenesis [BR:ko03016],	09182	09180
D|1136176.5.peg.404	1	450518	450778	+	261	668	647	670	610	719	697	215	281	314	195	290	251	450.146	452.719	472.932	449.831	475.402	455.09	325.599	393.059	412.789	299.014	410.495	375.804	414.407	0.310936	0.0731928	4.24818	2.16e-05	4.36e-05	YgfY COG2938	NA	K09159	cptB; antitoxin CptB	45	02048	Prokaryotic defense system [BR:ko02048],	09183	09180
D|1136176.5.peg.405	1	451249	452865	-	1617	2486	2326	2307	2428	2549	2530	1324	1450	1428	1166	1405	1263	1675.24	1627.55	1628.44	1790.47	1685.39	1651.91	2005.09	2028.24	1877.27	1787.95	1988.78	1891	1803.11	-0.203314	0.0419454	-4.84711	1.25e-06	2.83e-06	L-aspartate oxidase (EC 1.4.3.16)	KEGG_ENZYME:1.4.3.16	K00278	nadB; L-aspartate oxidase [EC:1.4.3.16]	426	00250 00760	Alanine, aspartate and glutamate metabolism [PATH:ko00250], Nicotinate and nicotinamide metabolism [PATH:ko00760],	09105 09108	09100
D|1136176.5.peg.406	1	453255	453833	+	579	28182.5	25921	25206.5	25325.5	27576	27427.5	8988.5	12120	10067.5	11066.5	10880.5	9963.5	18991	18137.5	17792.1	18675.3	18233.2	17907.8	13611.6	16953.3	13234.2	16968.7	15400.6	14916.9	16735.2	0.268793	0.0659178	4.07769	4.55e-05	8.87e-05	RNA polymerase sigma factor RpoE	NA	K03088	rpoE; RNA polymerase sigma-70 factor, ECF subfamily	161	03021	Transcription machinery [BR:ko03021],	09182	09180
D|1136176.5.peg.407	1	453860	454483	+	624	36964.5	34744.5	32508.5	31219.5	35263	35294	23211	22197.5	23588	23426.5	21610.5	20306.5	24909	24311.1	22946.4	23021.7	23315.8	23044.4	35151.1	31048.9	31009.1	35921.5	30588.9	30402.7	27972.6	-0.455628	0.0527634	-8.6353	5.86e-18	2.76e-17	Sigma factor RpoE negative regulatory protein RseA	NA	K03597	rseA; sigma-E factor negative regulatory protein RseA	76	03021	Transcription machinery [BR:ko03021],	09182	09180
D|1136176.5.peg.408	1	454480	455442	+	963	12693.5	12356.5	11246	10969.5	12147.5	12296	7482	7579.5	8159.5	7182.5	6984	6995.5	8553.45	8645.75	7938.19	8088.84	8031.57	8028.39	11330.9	10601.4	10725.9	11012.9	9885.85	10473.1	9443.02	-0.377489	0.0398526	-9.47213	2.74e-21	1.53e-20	Sigma factor RpoE negative regulatory protein RseB precursor	NA	K03598	rseB; sigma-E factor negative regulatory protein RseB	165	03021	Transcription machinery [BR:ko03021],	09182	09180
D|1136176.5.peg.409	1	455439	455909	+	471	2475.5	2227	2033	1926.5	2158.5	2331.5	1472.5	1426	1605	1423.5	1519	1492.5	1667.83	1558.28	1435.03	1420.29	1426.87	1521.97	2229.22	1994.67	2109.96	2182.03	2150.14	2233.86	1827.51	-0.514021	0.0512341	-10.0328	1.09e-23	6.6e-23	Sigma factor RpoE regulatory protein RseC	NA	K03803	rseC; sigma-E factor negative regulatory protein RseC	41	03021	Transcription machinery [BR:ko03021],	09182	09180
D|1136176.5.peg.410	1	456047	457840	+	1794	3175	3187	2856	2665	3145	3305	2080	2032	2276	1851	2086	2145	2139.54	2230.01	2015.96	1965.24	2079.47	2157.92	3149.98	2842.34	2992.06	2838.33	2952.73	3211.55	2547.93	-0.514588	0.0462746	-11.1203	9.99e-29	7.34e-28	Translation elongation factor LepA	NA	K03596	lepA; GTP-binding protein LepA	526	05134	Legionellosis [PATH:ko05134],	09171	09160
D|1136176.5.peg.411	1	457938	458834	+	897	719.5	679.5	666.5	647	699	702	243	314	295	245	302.5	286.5	484.513	475.11	470.108	477.116	462.178	458.355	368.003	439.219	387.811	375.684	427.481	428.207	437.815	0.219411	0.0560271	3.91615	9e-05	0.00017	Signal peptidase I (EC 3.4.21.89)	KEGG_ENZYME:3.4.21.89	K03100	lepB; signal peptidase I [EC:3.4.21.89]	202	03060 01002	Protein export [PATH:ko03060], Peptidases and inhibitors [BR:ko01002],	09123 09181	09120 09180
D|1136176.5.peg.412	1	458861	459538	+	678	1408.5	1294.5	1225.5	1277	1412	1341.5	349.5	403	424	311	362.5	389.5	948.811	905.439	864.688	941.695	933.612	875.575	528.531	563.711	557.396	476.889	512.411	582.421	724.265	0.762689	0.054259	14.0564	7.03e-45	9.41e-44	Ribonuclease III (EC 3.1.26.3)	KEGG_ENZYME:3.1.26.3	K03685	rnc, DROSHA, RNT1; ribonuclease III [EC:3.1.26.3]	169	03008 05205 03019 03009 03036	Ribosome biogenesis in eukaryotes [PATH:ko03008], Proteoglycans in cancer [PATH:ko05205], Messenger RNA biogenesis [BR:ko03019], Ribosome biogenesis [BR:ko03009], Chromosome and associated proteins [BR:ko03036],	09122 09161 09182	09120 09160 09180
D|1136176.5.peg.413	1	459531	460502	+	972	7316	6684	6581	6544	7120	7298.5	2680.5	2616	2975	2961	2703	2567	4930.04	4676.93	4645.32	4825.73	4707.73	4765.06	4058.63	3659.23	3910.98	4540.41	3826.1	3843.38	4365.79	0.260544	0.0497083	5.24145	1.59e-07	3.89e-07	GTP-binding protein Era	NA	K03595	era, ERAL1; GTPase	219	03009 03029	Ribosome biogenesis [BR:ko03009], Mitochondrial biogenesis [BR:ko03029],	09182	09180
D|1136176.5.peg.414	1	460606	461334	+	729	1535	1378	1357.5	1362.5	1434.5	1397.5	364.5	378	344.5	376.5	327.5	314	1034.39	964.215	957.863	1004.38	948.158	912.139	551.247	528.742	452.227	576.56	462.868	470.129	738.576	0.938149	0.0654688	14.3297	1.43e-46	1.97e-45	DNA recombination and repair protein RecO	NA	K03584	recO; DNA repair protein RecO (recombination protein O)	171	03440 03400	Homologous recombination [PATH:ko03440], DNA repair and recombination proteins [BR:ko03400],	09124 09182	09120 09180
D|1136176.5.peg.415	1	461331	462068	+	738	5609	4811	4617.5	4902.5	4771.5	4959.5	842.5	739	623.5	853.5	547.5	649	3779.74	3366.36	3258.99	3614.87	3154.58	3237.87	1275.14	1033.7	819.005	1307.99	774.278	971.699	2216.19	1.72405	0.124593	13.8375	1.51e-43	1.88e-42	Pyridoxine 5'-phosphate synthase (EC 2.6.99.2)	KEGG_ENZYME:2.6.99.2	K03474	pdxJ; pyridoxine 5-phosphate synthase [EC:2.6.99.2]	190	00750	Vitamin B6 metabolism [PATH:ko00750],	09108	09100
D|1136176.5.peg.416	1	462164	462544	+	381	2656	2190	2211	2449	2405	2365	468	464	403	553	424	366	1789.8	1532.39	1560.67	1805.96	1590.18	1544.17	708.746	649.037	529.79	847.973	600.172	547.985	1142.24	1.33983	0.106381	12.5946	2.26e-36	2.22e-35	Holo-[acyl-carrier protein] synthase (EC 2.7.8.7)	KEGG_ENZYME:2.7.8.7	K00997	acpS; holo-[acyl-carrier protein] synthase [EC:2.7.8.7]	77	00770	Pantothenate and CoA biosynthesis [PATH:ko00770],	09108	09100
D|1136176.5.peg.417	1	462661	465474	-	2814	1659	1621	1661	1525	1782	1768	492	589	670	528	616	569	1117.95	1134.25	1172.45	1124.58	1178.26	1154.37	745.092	823.886	880.792	809.638	871.948	851.921	988.761	0.464362	0.0443152	10.4786	1.08e-25	7.1e-25	BarA sensory histidine kinase ( VarS GacS)	NA	K07678	barA, gacS, varS; two-component system, NarL family, sensor histidine kinase BarA [EC:2.7.13.3]	518	02020 05111 02025 02026 01001 02022	Two-component system [PATH:ko02020], Biofilm formation - Vibrio cholerae [PATH:ko05111], Biofilm formation - Pseudomonas aeruginosa [PATH:ko02025], Biofilm formation - Escherichia coli [PATH:ko02026], Protein kinases [BR:ko01001], Two-component system [BR:ko02022],	09132 09145 09181 09183	09130 09140 09180
D|1136176.5.peg.418	1	465640	466959	+	1320	1759	1729	1714	1641	1827	1792	818	830	820	801	793	733	1185.34	1209.82	1209.86	1210.12	1208.01	1170.05	1238.79	1160.99	1077.98	1228.26	1122.49	1097.47	1176.6	0.0557545	0.0416302	1.33928	0.18048	0.219316	23S rRNA (Uracil-5-) -methyltransferase RumA (EC 2.1.1.-)	KEGG_ENZYME:2.1.1.-	K03215	rumA; 23S rRNA (uracil1939-C5)-methyltransferase [EC:2.1.1.190]	223	03009	Ribosome biogenesis [BR:ko03009],	09182	09180
D|1136176.5.peg.419	1	467095	469317	+	2223	4933	4946	4855	4615	5246	5053	1535	1651	1914	1427	1674	1615	3324.21	3460.82	3426.99	3403.23	3468.65	3299.24	2324.63	2309.4	2516.17	2188.17	2369.55	2418.02	2875.75	0.528273	0.0357326	14.7841	1.86e-49	2.74e-48	GTP pyrophosphokinase (EC 2.7.6.5)%2C (p)ppGpp synthetase I	KEGG_ENZYME:2.7.6.5	K00951	relA; GTP pyrophosphokinase [EC:2.7.6.5]	535	00230	Purine metabolism [PATH:ko00230],	09104	09100
D|1136176.5.peg.420	1	469610	470407	+	798	4757	4559	4635	4145	5091	4993	1411	1510	1665	1563	1775	1482	3205.61	3190.03	3271.7	3056.64	3366.16	3260.06	2136.84	2112.17	2188.83	2396.71	2512.51	2218.89	2743.01	0.51258	0.048733	10.5181	7.13e-26	4.71e-25	Nucleoside triphosphate pyrophosphohydrolase MazG (EC 3.6.1.8)	KEGG_ENZYME:3.6.1.8	K04765	mazG; nucleoside triphosphate diphosphatase [EC:3.6.1.9]	153	00230 00240 00760 00770	Purine metabolism [PATH:ko00230], Pyrimidine metabolism [PATH:ko00240], Nicotinate and nicotinamide metabolism [PATH:ko00760], Pantothenate and CoA biosynthesis [PATH:ko00770],	09104 09108	09100
D|1136176.5.peg.421	1	470558	472198	+	1641	8513	8485	8208	7612	8740	9051	2617	3002	3640	2653	3481	3025	5736.67	5937.13	5793.77	5613.3	5778.87	5909.64	3963.22	4199.16	4785.2	4068.12	4927.35	4529.11	5103.46	0.393072	0.0567465	6.9268	4.3e-12	1.41e-11	CTP synthase (EC 6.3.4.2)	KEGG_ENZYME:6.3.4.2	K01937	pyrG, CTPS; CTP synthase [EC:6.3.4.2]	479	00240	Pyrimidine metabolism [PATH:ko00240],	09104	09100
D|1136176.5.peg.422	1	472283	473581	+	1299	21762	22227	21529	20530	22791	23013	4275	5021	6454	3804	5945	5448	14664.8	15552.7	15196.6	15139.4	15069.4	15025.8	6474.12	7023.31	8484.52	5833.07	8415.14	8156.89	11253	1.03003	0.0897444	11.4773	1.71e-30	1.35e-29	Enolase (EC 4.2.1.11)	KEGG_ENZYME:4.2.1.11	K01689	ENO, eno; enolase [EC:4.2.1.11]	404	00010 00680 03018 04066 03019 04147	Glycolysis / Gluconeogenesis [PATH:ko00010], Methane metabolism [PATH:ko00680], RNA degradation [PATH:ko03018], HIF-1 signaling pathway [PATH:ko04066], Messenger RNA biogenesis [BR:ko03019], Exosome [BR:ko04147],	09101 09102 09123 09132 09182 09183	09100 09120 09130 09180
D|1136176.5.peg.423	1	473865	474146	+	282	99.5	87	93.5	80.5	93.5	85	65.5	67.5	65.5	52	55	69	66.7133	60.8757	65.6457	58.9942	61.4914	55.4988	98.437	93.7188	85.4499	79.737	77.8525	103.309	75.6436	-0.543143	0.113523	-4.78445	1.71e-06	3.82e-06	Cell division protein DivIC (FtsB)%2C stabilizes FtsL against RasP cleavage	NA	K05589	ftsB; cell division protein FtsB	41	03036	Chromosome and associated proteins [BR:ko03036],	09182	09180
D|1136176.5.peg.424	1	474146	474847	+	702	111	104	115.5	110	128.5	106.5	140	161	133.5	100	150.5	105	74.7997	72.7709	81.1748	81.117	84.6334	69.2103	212.018	225.205	174.844	153.34	212.325	157.209	133.221	-1.2934	0.11266	-11.4805	1.65e-30	1.3e-29	2-C-methyl-D-erythritol 4-phosphate cytidylyltransferase (EC 2.7.7.60)	KEGG_ENZYME:2.7.7.60	K00991	ispD; 2-C-methyl-D-erythritol 4-phosphate cytidylyltransferase [EC:2.7.7.60]	117	00900	Terpenoid backbone biosynthesis [PATH:ko00900],	09109	09100
D|1136176.5.peg.425	1	474850	475329	+	480	94	85	89	82.5	95	79.5	50.5	51.5	47	43	55.5	54	63.3439	59.4763	62.8223	60.469	62.8138	51.5812	75.7208	71.3382	61.7869	65.9364	77.8525	80.8502	66.1659	-0.264227	0.120076	-2.20049	0.0277723	0.0386564	2-C-methyl-D-erythritol 2%2C4-cyclodiphosphate synthase (EC 4.6.1.12)	KEGG_ENZYME:4.6.1.12	K01770	ispF; 2-C-methyl-D-erythritol 2,4-cyclodiphosphate synthase [EC:4.6.1.12]	164	00900	Terpenoid backbone biosynthesis [PATH:ko00900],	09109	09100
D|1136176.5.peg.426	1	475352	476398	+	1047	283.5	273	297	274	316	295	185	164	200	151	200	144	190.706	191.024	209.643	202.055	208.939	192.613	280.167	229.401	262.923	231.544	283.1	215.6	224.81	-0.33203	0.0785507	-4.22695	2.37e-05	4.76e-05	tRNA pseudouridine 13 synthase (EC 4.2.1.-)	KEGG_ENZYME:4.2.1.-	K06176	truD, PUS7; tRNA pseudouridine13 synthase [EC:5.4.99.27]	225	03016	Transfer RNA biogenesis [BR:ko03016],	09182	09180
D|1136176.5.peg.427	1	476474	477217	+	744	242	228	224.5	217.5	241.5	280	108	105.5	132.5	87.5	114	137	163.077	159.536	158.114	160.022	159.349	182.82	163.557	146.873	173.529	133.406	161.367	205.12	163.897	-0.00117228	0.0925097	-0.0126719	0.98989	0.991385	5-nucleotidase SurE (EC 3.1.3.5)	KEGG_ENZYME:3.1.3.5	K03787	surE; 5'-nucleotidase [EC:3.1.3.5]	195	00230 00240 00760	Purine metabolism [PATH:ko00230], Pyrimidine metabolism [PATH:ko00240], Nicotinate and nicotinamide metabolism [PATH:ko00760],	09104 09108	09100
D|1136176.5.peg.428	1	477218	477844	+	627	353	308	322.5	286.5	347.5	318	192	211.5	202.5	178.5	192	202	237.877	215.514	227.29	210.904	229.436	207.631	290.768	295.144	265.552	272.946	271.776	302.44	252.273	-0.352935	0.0681654	-5.17762	2.25e-07	5.43e-07	Protein-L-isoaspartate O-methyltransferase (EC 2.1.1.77)	KEGG_ENZYME:2.1.1.77	K00573	E2.1.1.77, pcm; protein-L-isoaspartate(D-aspartate) O-methyltransferase [EC:2.1.1.77]	144	99980	Enzymes with EC numbers,	09191	09190
D|1136176.5.peg.429	1	477880	478812	+	933	6520	6231	6203	6279	6838	6588	3709	3499	2755	2808	2903	2829	4393.64	4359.96	4378.5	4630.31	4521.27	4301.48	5616.97	4894.36	3621.76	4305.8	4109.2	4235.65	4447.41	-0.0105884	0.0900531	-0.11758	0.906401	0.922093	Lipoprotein NlpD	NA	K06194	nlpD; lipoprotein NlpD	127	99992	Structural proteins,	09193	09190
D|1136176.5.peg.430	1	478911	479891	+	981	15632	15790	15968	15349	17455	16581	27459	25453	24195	18824	22544	20987	10534	11048.6	11271.3	11318.8	11541.2	10826.2	41584.3	35603.3	31807.1	28864.8	31911	31422.3	22311.1	-1.59628	0.0794368	-20.095	8.16e-90	3.01e-88	RNA polymerase sigma factor RpoS	NA	K03087	rpoS; RNA polymerase nonessential primary-like sigma factor	210	05111 02026 03021	Biofilm formation - Vibrio cholerae [PATH:ko05111], Biofilm formation - Escherichia coli [PATH:ko02026], Transcription machinery [BR:ko03021],	09145 09182	09140 09180
D|1136176.5.peg.431	1	480001	482562	-	2562	519	540	495	499	528	514	365	376	403	326	425	361	349.739	377.849	349.405	367.976	349.113	335.604	552.762	525.944	529.79	499.89	601.587	540.498	448.346	-0.611125	0.0574362	-10.6401	1.94e-26	1.3e-25	DNA mismatch repair protein MutS	NA	K03555	mutS; DNA mismatch repair protein MutS	640	03430 03400	Mismatch repair [PATH:ko03430], DNA repair and recombination proteins [BR:ko03400],	09124 09182	09120 09180
D|1136176.5.peg.432	1	482686	483180	+	495	141	130	140	168	144	141	24	46	30	23	25	35	95.0159	90.9637	98.8215	123.888	95.2125	92.0627	36.346	64.3442	39.4384	35.2683	35.3875	52.4029	71.596	1.17483	0.150571	7.80245	6.07e-15	2.4e-14	C-terminal domain of CinA paralog%2C YdeJ	NA	K03743	pncC; nicotinamide-nucleotide amidase [EC:3.5.1.42]	82	00760	Nicotinate and nicotinamide metabolism [PATH:ko00760],	09108	09100
D|1136176.5.peg.433	1	483320	484360	+	1041	855	831	868	819	928	902	636	654	649	633	643	606	576.16	581.468	612.694	603.953	613.592	588.94	963.168	914.807	853.185	970.645	910.166	907.319	758.008	-0.624476	0.0450877	-13.8503	1.27e-43	1.59e-42	RecA protein	NA	K03553	recA; recombination protein RecA	277	03440 03400	Homologous recombination [PATH:ko03440], DNA repair and recombination proteins [BR:ko03400],	09124 09182	09120 09180
D|1136176.5.peg.434	1	484689	487271	+	2583	2665	2693	2655	2392	2763	2860	842	958	1131	823	1089	913	1795.87	1884.35	1874.08	1763.93	1826.89	1867.37	1275.14	1340.04	1486.83	1261.99	1541.48	1366.97	1607.08	0.411785	0.0529538	7.77631	7.47e-15	2.93e-14	Alanyl-tRNA synthetase (EC 6.1.1.7)	KEGG_ENZYME:6.1.1.7	K01872	AARS, alaS; alanyl-tRNA synthetase [EC:6.1.1.7]	639	00970 01007 03016	Aminoacyl-tRNA biosynthesis [PATH:ko00970], Amino acid related enzymes [BR:ko01007], Transfer RNA biogenesis [BR:ko03016],	09122 09181 09182	09120 09180
D|1136176.5.peg.435	1	487492	488673	+	1182	475	443	451	522	510	518	161	163	181	152	166	141	320.089	309.976	318.347	384.937	337.211	338.216	243.821	228.002	237.945	233.077	234.973	211.109	283.142	0.53129	0.0751732	7.06754	1.58e-12	5.32e-12	Aspartokinase (EC 2.7.2.4)	KEGG_ENZYME:2.7.2.4	K00928	lysC; aspartate kinase [EC:2.7.2.4]	149	00260 00270 00300 00261	Glycine, serine and threonine metabolism [PATH:ko00260], Cysteine and methionine metabolism [PATH:ko00270], Lysine biosynthesis [PATH:ko00300], Monobactam biosynthesis [PATH:ko00261],	09105 09110	09100
D|1136176.5.peg.436	1	488766	488963	+	198	224	201	230	229	238	238	99	83	106	106	119	104	150.947	140.644	162.35	168.871	157.365	155.397	149.927	116.099	139.349	162.541	168.444	155.711	152.304	0.0709157	0.0913143	0.776612	0.437388	0.485963	Carbon storage regulator	NA	K03563	csrA; carbon storage regulator	74	02020 05111 02025 02026 03019	Two-component system [PATH:ko02020], Biofilm formation - Vibrio cholerae [PATH:ko05111], Biofilm formation - Pseudomonas aeruginosa [PATH:ko02025], Biofilm formation - Escherichia coli [PATH:ko02026], Messenger RNA biogenesis [BR:ko03019],	09132 09145 09182	09130 09140 09180
D|1136176.5.peg.437	1	491207	491464	+	258	97	94	87	81	98	102	22	38	20	21	36	25	65.3655	65.7737	61.4105	59.7316	64.7974	66.5986	33.3171	53.1539	26.2923	32.2015	50.958	37.4306	51.4192	0.717588	0.147164	4.87611	1.08e-06	2.47e-06	Oxaloacetate decarboxylase gamma chain (EC 4.1.1.3)	KEGG_ENZYME:4.1.1.3	K01573	oadG; oxaloacetate decarboxylase (Na+ extruding) subunit gamma	32	00620 02000	Pyruvate metabolism [PATH:ko00620], Transporters [BR:ko02000],	09101 09183	09100 09180
D|1136176.5.peg.438	1	491496	493280	+	1785	534.5	547.5	554.5	509.5	565.5	551	205	218	235	181	245.5	192.5	359.847	382.747	391.051	375.351	373.577	359.763	310.455	304.936	308.934	277.546	346.797	287.467	339.873	0.286149	0.0623158	4.59191	4.39e-06	9.47e-06	Oxaloacetate decarboxylase alpha chain (EC 4.1.1.3)	KEGG_ENZYME:4.1.1.3	K01571	oadA; oxaloacetate decarboxylase (Na+ extruding) subunit alpha [EC:7.2.4.2]	458	00620 02000	Pyruvate metabolism [PATH:ko00620], Transporters [BR:ko02000],	09101 09183	09100 09180
D|1136176.5.peg.439	1	493290	494420	+	1131	1735.5	1465.5	1448.5	1460.5	1613.5	1566	305	363	342	297	301.5	291.5	1169.17	1025.09	1022.1	1076.64	1066.51	1022.48	461.897	507.76	449.598	455.421	426.065	435.693	759.869	1.2215	0.0583797	20.9233	3.29e-97	1.44e-95	Oxaloacetate decarboxylase beta chain (EC 4.1.1.3)	KEGG_ENZYME:4.1.1.3	K20509	madB, oadB, gcdB, mmdB; carboxybiotin decarboxylase [EC:7.2.4.1]	426	00620 00650 00362 02000	Pyruvate metabolism [PATH:ko00620], Butanoate metabolism [PATH:ko00650], Benzoate degradation [PATH:ko00362], Transporters [BR:ko02000],	09101 09111 09183	09100 09180
D|1136176.5.peg.440	1	494591	495544	+	954	2731	2515.5	2571	2423.5	2732.5	2819.5	1545	1669	1643.5	1573	1507.5	1403	1840.34	1759.8	1814.79	1786.79	1806.39	1840.6	2339.77	2334.58	2159.91	2412.05	2133.16	2100.61	2027.4	-0.312761	0.041119	-7.60623	2.82e-14	1.07e-13	NADPH:quinone reductase	NA	K00344	qor, CRYZ; NADPH:quinone reductase [EC:1.6.5.5]	134	99980	Enzymes with EC numbers,	09191	09190
D|1136176.5.peg.441	1	495551	496012	+	462	543	526	486	476.5	476.5	551.5	176.5	157	245.5	147.5	177	176.5	365.912	368.053	343.052	351.015	314.73	359.763	266.537	219.61	322.081	225.41	250.543	263.512	304.185	0.439424	0.0864768	5.08141	3.75e-07	8.9e-07	Putative membrane protein	NA			70
D|1136176.5.peg.442	1	496022	498880	+	2859	6050	5786.5	5543	5340	6027	6080	2097.5	2364	2547	2156.5	2435.5	2484.5	4076.92	4048.58	3912.63	3937.86	3985.04	3969.8	3175.73	3306.73	3348.32	3306.02	3446.74	3719.11	3686.12	0.237257	0.0377403	6.28657	3.25e-10	9.44e-10	Protease%2C insulinase family/protease%2C insulinase family	NA	K07263	pqqL; zinc protease [EC:3.4.24.-]	513	01002	Peptidases and inhibitors [BR:ko01002],	09181	09180
D|1136176.5.peg.443	1	498980	500548	+	1569	4145.5	3955.5	3751.5	3684	4077	4229	1353	1517.5	1648.5	1295	1548.5	1397.5	2793.2	2767.4	2647.71	2716.68	2695.71	2761.23	2049	2121.96	2166.48	1985.76	2191.19	2091.62	2415.66	0.377211	0.0320091	11.7845	4.69e-32	3.85e-31	Glutamate--cysteine ligase (EC 6.3.2.2)	KEGG_ENZYME:6.3.2.2	K01919	gshA; glutamate--cysteine ligase [EC:6.3.2.2]	430	00270 00480	Cysteine and methionine metabolism [PATH:ko00270], Glutathione metabolism [PATH:ko00480],	09105 09106	09100
D|1136176.5.peg.444	1	500559	501209	+	651	1476.5	1419.5	1323.5	1364.5	1531	1570.5	482.5	577	716	556.5	608	557	994.634	992.904	933.864	1005.85	1012.29	1025.1	729.948	807.1	941.264	852.573	860.624	833.955	915.842	0.24597	0.0556106	4.42309	9.73e-06	2.03e-05	D01200315: hypothetical protein	NA			101
D|1136176.5.peg.445	1	501234	501752	+	519	800	800	784	714.5	786	861.5	257.5	284.5	383.5	307.5	342.5	344.5	539.097	559.777	553.401	526.523	519.702	562.17	389.205	397.256	503.497	470.755	484.101	515.046	501.711	0.239973	0.0709411	3.38272	0.000718	0.00123625	S-ribosylhomocysteine lyase (EC 4.4.1.21) / Autoinducer-2 production protein LuxS	KEGG_ENZYME:4.4.1.21	K07173	luxS; S-ribosylhomocysteine lyase [EC:4.4.1.21]	184	00270 02024 05111 02026	Cysteine and methionine metabolism [PATH:ko00270], Quorum sensing [PATH:ko02024], Biofilm formation - Vibrio cholerae [PATH:ko05111], Biofilm formation - Escherichia coli [PATH:ko02026],	09105 09145	09100 09140
D|1136176.5.peg.446	1	501890	503161	-	1272	2039	1977	2039	1923	2106	2191	970	1135	1025	927	919	940	1374.02	1383.35	1439.27	1418.07	1392.48	1430.56	1468.98	1587.62	1347.48	1421.47	1300.84	1407.39	1414.3	-0.0160797	0.0471811	-0.340808	0.733248	0.769554	Hemolysins and related proteins containing CBS domains	NA			307
D|1136176.5.peg.447	1	503289	504092	-	804	363	379	346	364	396	440	245	248	239	169	239	220	244.615	265.194	244.23	268.424	261.834	287.288	371.032	346.899	314.193	259.145	338.304	329.39	294.212	-0.318111	0.0803947	-3.95687	7.59e-05	0.000145	Glutamate synthase [NADPH] small chain (EC 1.4.1.13)	KEGG_ENZYME:1.4.1.13			176
D|1136176.5.peg.448	1	504284	505678	+	1395	7737	7167	7384	7187	7972	7680	4411	4174	3946	4375	3845	3743	5213.74	5014.9	5212.13	5299.89	5271.07	5014.48	6680.09	5838.54	5187.47	6708.64	5442.6	5604.12	5540.64	-0.192543	0.0670601	-2.8712	0.00408911	0.00636967	Signal recognition particle%2C subunit Ffh SRP54 (TC 3.A.5.1.1)	NA	K03106	SRP54, ffh; signal recognition particle subunit SRP54 [EC:3.6.5.4]	331	03060 03070 02024 02044	Protein export [PATH:ko03060], Bacterial secretion system [PATH:ko03070], Quorum sensing [PATH:ko02024], Secretion system [BR:ko02044],	09123 09131 09145 09183	09120 09130 09140 09180
D|1136176.5.peg.449	1	505891	506139	+	249	2349	2225	2139	2161	2184.5	2302.5	468	519	520	407.5	551	566	1582.92	1556.88	1509.85	1593.58	1444.06	1503.04	708.746	725.971	683.599	624.096	779.94	847.43	1130.01	1.07247	0.0645628	16.6112	5.78e-62	1.18e-60	SSU ribosomal protein S16p	NA	K02959	RP-S16, MRPS16, rpsP; small subunit ribosomal protein S16	91	03010 03011 03029	Ribosome [PATH:ko03010], Ribosome [BR:ko03011], Mitochondrial biogenesis [BR:ko03029],	09122 09182	09120 09180
D|1136176.5.peg.450	1	506164	506718	+	555	7012.5	7137	6455	5989	7146	7107	2641	3009.5	3372	2410	3154.5	2961.5	4725.19	4993.91	4556.38	4416.45	4724.92	4640.35	3999.57	4208.95	4432.88	3695.5	4464.49	4433.29	4440.99	0.152724	0.0536164	2.84845	0.00439326	0.00681829	16S rRNA processing protein RimM	NA	K02860	rimM; 16S rRNA processing protein RimM	120	03009	Ribosome biogenesis [BR:ko03009],	09182	09180
D|1136176.5.peg.451	1	506745	507485	+	741	6655.5	6719	5866	5584	6467.5	6747.5	1918	2319.5	2584	1832.5	2462.5	2221.5	4484.61	4701.42	4140.62	4117.79	4275.97	4405.3	2904.65	3243.79	3396.96	2809.2	3484.96	3325.34	3774.22	0.446684	0.0618811	7.21842	5.26e-13	1.83e-12	tRNA (Guanine37-N1) -methyltransferase (EC 2.1.1.31)	KEGG_ENZYME:2.1.1.31	K00554	trmD; tRNA (guanine37-N1)-methyltransferase [EC:2.1.1.228]	210	03016	Transfer RNA biogenesis [BR:ko03016],	09182	09180
D|1136176.5.peg.452	1	507545	507898	+	354	2231	2160	1873	1655	2098	2111	641	762	1057	716	879	918	1503.41	1511.4	1322.09	1220.44	1387.19	1378.33	970.74	1065.88	1389.55	1097.92	1244.22	1374.45	1288.8	0.220236	0.0949879	2.31857	0.0204184	0.0290743	LSU ribosomal protein L19p	NA	K02884	RP-L19, MRPL19, rplS; large subunit ribosomal protein L19	134	03010 03011	Ribosome [PATH:ko03010], Ribosome [BR:ko03011],	09122 09182	09120 09180
D|1136176.5.peg.453	1	508159	508356	-	198	98	67	84	75	80	105	48	64	63	45	64	64	66.0394	46.8813	59.2929	55.3071	52.8959	68.5573	72.6919	89.5224	82.8207	69.0032	90.592	95.8224	70.7855	-0.520371	0.127091	-4.09447	4.23e-05	8.29e-05	D003276: zinc-binding protein	NA	K09862	K09862; uncharacterized protein	38	99997	Function unknown,	09194	09190
D|1136176.5.peg.454	1	508438	509178	-	741	2019.5	1852	1922	1839.5	2058.5	2037.5	1234.5	1245.5	1390	1297.5	1268	1189	1360.55	1295.88	1356.68	1356.13	1360.75	1330.01	1868.79	1741.49	1827.31	1988.83	1794.85	1780.2	1588.46	-0.448218	0.0377606	-11.87	1.7e-32	1.41e-31	D002842: hypothetical protein	NA	K18778	zapD; cell division protein ZapD	127	03036	Chromosome and associated proteins [BR:ko03036],	09182	09180
D|1136176.5.peg.455	1	509205	509819	-	615	424	412	416.5	425.5	432.5	420.5	134.5	146	117	92.5	110.5	120.5	285.721	288.285	293.641	313.407	285.638	274.229	202.932	204.223	153.81	141.073	155.705	179.667	231.528	0.746934	0.0859292	8.69244	3.55e-18	1.69e-17	Dephospho-CoA kinase (EC 2.7.1.24)	KEGG_ENZYME:2.7.1.24	K00859	coaE; dephospho-CoA kinase [EC:2.7.1.24]	104	00770	Pantothenate and CoA biosynthesis [PATH:ko00770],	09108	09100
D|1136176.5.peg.456	1	509822	510691	-	870	139.5	159	160.5	141	152	157	105	119.5	111	96	96.5	128.5	93.6681	111.256	112.939	103.977	100.502	102.51	159.014	166.456	145.922	147.207	135.888	191.645	130.915	-0.597659	0.0956439	-6.2488	4.14e-10	1.2e-09	Leader peptidase (Prepilin peptidase) (EC 3.4.23.43) / N-methyltransferase (EC 2.1.1.-)	KEGG_ENZYME:3.4.23.43,KEGG_ENZYME:2.1.1.-	K02654	pilD, pppA; leader peptidase (prepilin peptidase) / N-methyltransferase [EC:3.4.23.43 2.1.1.-]	165	01002 02044 02035	Peptidases and inhibitors [BR:ko01002], Secretion system [BR:ko02044], Bacterial motility proteins [BR:ko02035],	09181 09183	09180
D|1136176.5.peg.457	1	510758	511987	-	1230	99	84	82	94	95	99.5	36	23.5	31	36	39	27	66.7133	58.7765	57.8812	69.3182	62.8138	64.6398	54.5189	32.1721	40.753	55.2026	55.2045	40.4251	54.8683	0.456285	0.139077	3.2808	0.00103511	0.00175045	Type IV fimbrial assembly protein PilC	NA	K02653	pilC; type IV pilus assembly protein PilC	249	02044 02035	Secretion system [BR:ko02044], Bacterial motility proteins [BR:ko02035],	09183	09180
D|1136176.5.peg.458	1	512002	513687	-	1686	891.5	813.5	795	802	829.5	884	278	246	278.5	253	285.5	221.5	600.419	568.873	561.165	591.417	548.133	577.187	421.007	344.102	365.463	387.951	403.417	330.887	475.002	0.614537	0.0610046	10.0736	7.23e-24	4.4e-23	Type IV fimbrial assembly%2C ATPase PilB	NA	K02652	pilB; type IV pilus assembly protein PilB	298	02044 02035	Secretion system [BR:ko02044], Bacterial motility proteins [BR:ko02035],	09183	09180
D|1136176.5.peg.459	1	513687	514160	-	474	191.5	174.5	167	165	177.5	166.5	23	18.5	22.5	30	25.5	21.5	128.709	121.751	117.88	121.676	117.032	108.386	34.8315	25.1782	28.9215	46.0021	35.3875	31.4417	76.4331	1.83449	0.142393	12.8833	5.59e-38	5.86e-37	Type IV pilin PilA	NA	K02650	pilA; type IV pilus assembly protein PilA	13	02020 02044 02035	Two-component system [PATH:ko02020], Secretion system [BR:ko02044], Bacterial motility proteins [BR:ko02035],	09132 09183	09130 09180
D|1136176.5.peg.460	1	514414	515304	-	891	294	321	311	305	336	366	198	186	192	129	158	204	198.118	224.61	219.525	224.915	222.163	238.971	299.854	260.174	252.406	197.809	223.649	305.434	238.969	-0.212231	0.097643	-2.17354	0.0297394	0.04132	Quinolinate phosphoribosyltransferase [decarboxylating] (EC 2.4.2.19)	KEGG_ENZYME:2.4.2.19	K00767	nadC, QPRT; nicotinate-nucleotide pyrophosphorylase (carboxylating) [EC:2.4.2.19]	205	00760	Nicotinate and nicotinamide metabolism [PATH:ko00760],	09108	09100
D|1136176.5.peg.461	1	515388	515987	+	600	75	101	85	75	92	117	56	44	37	54	59	44	50.5403	70.6718	59.9988	55.3071	60.8302	76.3925	84.8072	61.5466	48.6407	82.8038	83.5145	65.8779	66.7443	-0.185332	0.14969	-1.2381	0.215677	0.257216	N-acetylmuramoyl-L-alanine amidase (EC 3.5.1.28) AmpD	KEGG_ENZYME:3.5.1.28	K03806	ampD; N-acetyl-anhydromuramoyl-L-alanine amidase [EC:3.5.1.28]	126	01011	Peptidoglycan biosynthesis and degradation proteins [BR:ko01011],	09181	09180
D|1136176.5.peg.462	1	516469	517230	+	762	1229	1217	1090	1037	1167	1210	451	480	609	435	621	566	828.188	851.56	769.396	764.712	771.618	790.042	683.001	671.418	800.6	667.031	879.025	847.43	777.002	0.0696859	0.0775388	0.898722	0.368801	0.417046	Transcriptional repressor for pyruvate dehydrogenase complex	NA	K05799	pdhR; GntR family transcriptional regulator, transcriptional repressor for pyruvate dehydrogenase complex	179	03000	Transcription factors [BR:ko03000],	09182	09180
D|1136176.5.peg.463	1	517293	519956	+	2664	4823	4991.5	4570.5	4163.5	4891	4856.5	1942	2229	2837.5	1576	2508.5	2331	3250.08	3492.31	3225.82	3069.91	3233.92	3170.61	2940.99	3117.9	3729.56	2416.65	3550.07	3490.03	3223.99	0.0144591	0.0932777	0.155011	0.876812	0.895328	Pyruvate dehydrogenase E1 component (EC 1.2.4.1)	KEGG_ENZYME:1.2.4.1	K00163	aceE; pyruvate dehydrogenase E1 component [EC:1.2.4.1]	782	00010 00020 00620	Glycolysis / Gluconeogenesis [PATH:ko00010], Citrate cycle (TCA cycle) [PATH:ko00020], Pyruvate metabolism [PATH:ko00620],	09101	09100
D|1136176.5.peg.464	1	519987	521885	+	1899	8670	8513.5	7910.5	7567.5	8518	8659.5	1756	2095	2591.5	1629	2440.5	2186	5842.46	5956.72	5583.42	5580.11	5632.09	5653.7	2659.31	2930.46	3406.17	2497.92	3453.82	3272.94	4372.43	0.910148	0.0799581	11.3828	5.09e-30	3.93e-29	Dihydrolipoamide acetyltransferase component of pyruvate dehydrogenase complex (EC 2.3.1.12)	KEGG_ENZYME:2.3.1.12	K00627	DLAT, aceF, pdhC; pyruvate dehydrogenase E2 component (dihydrolipoamide acetyltransferase) [EC:2.3.1.12]	442	00010 00020 00620	Glycolysis / Gluconeogenesis [PATH:ko00010], Citrate cycle (TCA cycle) [PATH:ko00020], Pyruvate metabolism [PATH:ko00620],	09101	09100
D|1136176.5.peg.465	1	522128	523558	+	1431	3353	3306	3203	2852	3320	3369	1399	1451	1658	1088	1717	1457	2259.49	2313.28	2260.9	2103.14	2195.18	2199.71	2118.67	2029.64	2179.63	1668.34	2430.41	2181.46	2161.65	0.0801965	0.0747724	1.07254	0.283477	0.329057	Dihydrolipoamide dehydrogenase of pyruvate dehydrogenase complex (EC 1.8.1.4)	KEGG_ENZYME:1.8.1.4	K00382	DLD, lpd, pdhD; dihydrolipoamide dehydrogenase [EC:1.8.1.4]	422	00010 00020 00620 00630 00640 00260 00280 00310 00380 04147	Glycolysis / Gluconeogenesis [PATH:ko00010], Citrate cycle (TCA cycle) [PATH:ko00020], Pyruvate metabolism [PATH:ko00620], Glyoxylate and dicarboxylate metabolism [PATH:ko00630], Propanoate metabolism [PATH:ko00640], Glycine, serine and threonine metabolism [PATH:ko00260], Valine, leucine and isoleucine degradation [PATH:ko00280], Lysine degradation [PATH:ko00310], Tryptophan metabolism [PATH:ko0…	09101 09105 09183	09100 09180
D|1136176.5.peg.466	1	523967	524572	-	606	7780	7668	7673	6922	7797	8084	3343	3171	4518	3431	4289	4153	5242.72	5365.46	5416.13	5104.47	5155.36	5278.26	5062.69	4435.55	5939.43	5261.11	6071.08	6217.98	5379.19	-0.0637615	0.077652	-0.821119	0.411578	0.459929	Quorum-sensing regulator of virulence HapR	NA			11
D|1136176.5.peg.467	1	524859	525440	+	582	1301	1355	1273	1118	1284	1324	387	464	651	542	583	578	876.707	948.121	898.57	824.444	848.979	864.475	586.079	649.037	855.814	831.105	825.236	865.396	822.83	0.189528	0.0947726	1.99982	0.0455197	0.061443	Hypoxanthine-guanine phosphoribosyltransferase (EC 2.4.2.8)	KEGG_ENZYME:2.4.2.8	K00760	hprT, hpt, HPRT1; hypoxanthine phosphoribosyltransferase [EC:2.4.2.8]	124	00230 00983	Purine metabolism [PATH:ko00230], Drug metabolism - other enzymes [PATH:ko00983],	09104 09111	09100
D|1136176.5.peg.468	1	525527	526186	-	660	295	269	282	249	285	275	117	131	154	141	138	149	198.792	188.225	199.055	183.619	188.441	179.555	177.187	183.241	202.451	216.21	195.339	223.087	194.6	-0.0731236	0.0764528	-0.956454	0.338843	0.386844	Carbonic anhydrase (EC 4.2.1.1)	KEGG_ENZYME:4.2.1.1	K01673	cynT, can; carbonic anhydrase [EC:4.2.1.1]	180	00910	Nitrogen metabolism [PATH:ko00910],	09102	09100
D|1136176.5.peg.469	1	526431	528104	+	1674	293	289	262	268	295	318	118	120	144	123	121	122	197.444	202.219	184.937	197.631	195.053	207.631	178.701	167.854	189.304	188.609	171.275	182.662	188.61	0.136585	0.0750532	1.81984	0.0687834	0.0901448	Sulfate permease	NA	K03321	TC.SULP; sulfate permease, SulP family	385	02000	Transporters [BR:ko02000],	09183	09180
D|1136176.5.peg.470	1	528441	529358	+	918	297.5	284	261.5	257	277	302.5	207	193	252.5	192	222	212	200.14	198.721	184.232	189.519	183.152	197.184	313.484	269.966	331.283	294.414	314.241	317.412	249.479	-0.675427	0.0687572	-9.82336	8.93e-23	5.21e-22	ABC-type multidrug transport system%2C ATPase component	NA	K01990	ABC-2.A; ABC-2 type transport system ATP-binding protein	227	02000	Transporters [BR:ko02000],	09183	09180
D|1136176.5.peg.471	1	529360	530130	+	771	298.5	283	290.5	286	318	311.5	169	165	194.5	140	199	246	200.814	198.021	204.702	210.904	210.261	203.06	255.936	230.8	255.035	214.677	281.684	368.317	236.184	-0.387383	0.107465	-3.60475	0.000312	0.000561	ABC-type multidrug transport system%2C permease component	NA	K01992	ABC-2.P; ABC-2 type transport system permease protein	240	02000	Transporters [BR:ko02000],	09183	09180
D|1136176.5.peg.472	1	530232	531122	-	891	467	354.5	350.5	356.5	392	360.5	93	102	106.5	109	123	123	314.698	247.701	247.054	262.524	259.19	235.054	140.841	142.676	139.349	167.141	174.106	184.159	209.541	0.725991	0.100226	7.24353	4.37e-13	1.53e-12	Pantoate--beta-alanine ligase (EC 6.3.2.1)	KEGG_ENZYME:6.3.2.1	K01918	panC; pantoate--beta-alanine ligase [EC:6.3.2.1]	188	00410 00770	beta-Alanine metabolism [PATH:ko00410], Pantothenate and CoA biosynthesis [PATH:ko00770],	09106 09108	09100
D|1136176.5.peg.473	1	531131	531925	-	795	352.5	326.5	270	289	289	305.5	78.5	88.5	107	85.5	93	71	237.203	228.109	190.584	213.117	191.086	199.143	118.124	123.093	140.664	130.339	131.641	106.303	167.451	0.744132	0.0964792	7.71287	1.23e-14	4.75e-14	3-methyl-2-oxobutanoate hydroxymethyltransferase (EC 2.1.2.11)	KEGG_ENZYME:2.1.2.11	K00606	panB; 3-methyl-2-oxobutanoate hydroxymethyltransferase [EC:2.1.2.11]	207	00770	Pantothenate and CoA biosynthesis [PATH:ko00770],	09108	09100
D|1136176.5.peg.474	1	531948	532433	-	486	201	187	196.5	179.5	202	205	86.5	88.5	83	80	96.5	78	135.448	130.848	138.35	132	133.562	133.85	130.24	123.093	109.113	122.672	135.888	116.784	128.487	0.126048	0.0882414	1.42844	0.153165	0.188919	2-amino-4-hydroxy-6-hydroxymethyldihydropteridine pyrophosphokinase (EC 2.7.6.3)	KEGG_ENZYME:2.7.6.3	K00950	folK; 2-amino-4-hydroxy-6-hydroxymethyldihydropteridine diphosphokinase [EC:2.7.6.3]	139	00790	Folate biosynthesis [PATH:ko00790],	09108	09100
D|1136176.5.peg.475	1	532430	533785	-	1356	1095.5	1156	1020	977	1059	1191	625	676	645.5	506.5	562.5	592	737.889	808.877	719.986	720.467	700.209	777.636	946.509	945.58	847.926	775.903	795.511	886.358	805.238	-0.219181	0.0630765	-3.47485	0.000511	0.000897	Poly(A) polymerase (EC 2.7.7.19)	KEGG_ENZYME:2.7.7.19	K00970	pcnB; poly(A) polymerase [EC:2.7.7.19]	257	03018 03019	RNA degradation [PATH:ko03018], Messenger RNA biogenesis [BR:ko03019],	09123 09182	09120 09180
D|1136176.5.peg.476	1	533969	534844	-	876	387	358	346	362	341	387	80	85	98	82	78	80	260.788	250.5	244.23	266.949	225.469	252.683	121.153	118.897	128.832	125.739	110.409	119.778	185.452	1.04878	0.08524	12.3038	8.64e-35	7.91e-34	glutamyl-Q-tRNA synthetase	NA	K01894	gluQ; glutamyl-Q tRNA(Asp) synthetase [EC:6.1.1.-]	244	01007 03016	Amino acid related enzymes [BR:ko01007], Transfer RNA biogenesis [BR:ko03016],	09181 09182	09180
D|1136176.5.peg.477	1	535063	535509	-	447	7122	6576	6038	6121	6520	6711	1137	1143	1237	1229	1210	1210	4799.31	4601.36	4262.03	4513.79	4311.01	4381.79	1721.89	1598.81	1626.18	1884.55	1712.75	1811.64	3102.09	1.37628	0.0496944	27.6949	8.04e-169	1.29e-166	C4-type zinc finger protein%2C DksA/TraR family	NA	K06204	dksA; DnaK suppressor protein	126	02026 03000 03021 03009	Biofilm formation - Escherichia coli [PATH:ko02026], Transcription factors [BR:ko03000], Transcription machinery [BR:ko03021], Ribosome biogenesis [BR:ko03009],	09145 09182	09140 09180
D|1136176.5.peg.478	1	535645	536370	-	726	8742	7492	7445	8136	7980	8031	807	879	659	946	695	724	5890.98	5242.31	5255.19	5999.71	5276.36	5243.66	1222.13	1229.53	866.331	1450.6	983.772	1083.99	3312.05	2.26785	0.107024	21.1901	1.18e-99	5.58e-98	Sugar/maltose fermentation stimulation protein homolog	NA	K06206	sfsA; sugar fermentation stimulation protein A	158	99981	Carbohydrate metabolism,	09191	09190
D|1136176.5.peg.479	1	536405	538903	+	2499	429.5	470.5	466.5	418	465	475.5	218.5	219	236.5	176	221	227	289.091	328.869	328.935	308.245	307.457	310.14	330.143	306.334	310.249	269.879	312.825	339.87	311.836	0.00209241	0.0660972	0.0316566	0.974746	0.979388	ATP-dependent helicase HrpB	NA	K03579	hrpB; ATP-dependent helicase HrpB [EC:3.6.4.13]	382	99980	Enzymes with EC numbers,	09191	09190
D|1136176.5.peg.480	1	538900	541299	+	2400	1389.5	1292.5	1230.5	1294	1363	1299.5	360.5	403	406.5	370	449	356	936.007	904.039	868.218	954.231	901.213	848.152	545.189	563.711	533.733	567.36	635.559	533.012	732.536	0.679339	0.0549744	12.3574	4.44e-35	4.13e-34	Multimodular transpeptidase-transglycosylase (EC 2.4.1.129) (EC 3.4.-.-)	KEGG_ENZYME:2.4.1.129,KEGG_ENZYME:3.4.-.-	K05365	mrcB; penicillin-binding protein 1B [EC:2.4.1.129 3.4.16.4]	403	00550 01003 01011	Peptidoglycan biosynthesis [PATH:ko00550], Glycosyltransferases [BR:ko01003], Peptidoglycan biosynthesis and degradation proteins [BR:ko01011],	09107 09181	09100 09180
D|1136176.5.peg.481	1	541338	543671	+	2334	1613	1461	1549	1443	1567	1626	721	743	749	619	796	671	1086.95	1022.29	1093.39	1064.11	1036.1	1061.66	1091.89	1039.3	984.646	949.177	1126.74	1004.64	1046.74	0.0384977	0.0467783	0.822981	0.410519	0.458966	putative patatin-like phospholipase	NA	K07001	K07001; NTE family protein	295	99996	General function prediction only,	09194	09190
D|1136176.5.peg.482	1	543917	546532	+	2616	9646	9660	8869	8195	9643	9718	7357	8146	9182	5367	8640	7964	6500.16	6759.3	6260.34	6043.22	6375.93	6345.14	11141.6	11394.5	12070.8	8229.78	12229.9	11923.9	8772.88	-0.80727	0.086934	-9.28601	1.6e-20	8.62e-20	Aconitate hydratase 2 (EC 4.2.1.3) @ 2-methylisocitrate dehydratase (EC 4.2.1.99)	KEGG_ENZYME:4.2.1.3,KEGG_ENZYME:4.2.1.99	K01682	acnB; aconitate hydratase 2 / 2-methylisocitrate dehydratase [EC:4.2.1.3 4.2.1.99]	716	00020 00630 00640 00720	Citrate cycle (TCA cycle) [PATH:ko00020], Glyoxylate and dicarboxylate metabolism [PATH:ko00630], Propanoate metabolism [PATH:ko00640], Carbon fixation pathways in prokaryotes [PATH:ko00720],	09101 09102	09100
D|1136176.5.peg.483	1	546758	547126	+	369	156	130	149	118	145	143	25	48	31	37	35	27	105.124	90.9637	105.174	87.0164	95.8737	93.3686	37.8604	67.1418	40.753	56.736	49.5425	40.4251	72.4983	0.981602	0.133119	7.37387	1.66e-13	5.94e-13	D01200735: hypothetical protein	NA	K09910	K09910; uncharacterized protein	37	99997	Function unknown,	09194	09190
D|1136176.5.peg.484	1	547394	547732	+	339	12	12	12	17	18	18	10	17	10	6	13	11	8.08646	8.39665	8.47042	12.5363	11.9016	11.7527	15.1442	23.7794	13.1461	9.20043	18.4015	16.4695	13.1071	-0.658008	0.261209	-2.51909	0.0117658	0.0173277	Nitrogen regulatory protein P-II	NA	K04752	glnK; nitrogen regulatory protein P-II 2	95	99973	Transcription,	09192	09190
D|1136176.5.peg.485	1	547760	548989	+	1230	1289	1228	1220	1134	1257	1266	332	348	460	359	442	420	868.62	859.257	861.159	836.243	831.126	826.606	502.786	486.778	604.723	550.492	625.651	628.835	706.856	0.579791	0.0644268	8.99922	2.27e-19	1.15e-18	Ammonium transporter	NA	K03320	amt, AMT, MEP; ammonium transporter, Amt family	331	02000	Transporters [BR:ko02000],	09183	09180
D|1136176.5.peg.486	1	549287	550300	+	1014	346	342	326	309	365	363	203	194	207	166	201	189	233.159	239.304	230.113	227.865	241.337	237.013	307.426	271.365	272.125	254.545	284.515	282.976	256.812	-0.246908	0.0650419	-3.79613	0.000147	0.000273	Ferric iron ABC transporter%2C iron-binding protein	NA	K02012	afuA, fbpA; iron(III) transport system substrate-binding protein	245	02010 02000	ABC transporters [PATH:ko02010], Transporters [BR:ko02000],	09131 09183	09130 09180
D|1136176.5.peg.487	1	550547	552172	+	1626	328.5	350	282.5	317.5	321	334	136	135	149.5	132	126.5	130.5	221.03	244.902	199.055	233.764	212.245	218.078	205.96	188.836	195.878	202.409	178.353	194.639	207.929	0.1893	0.0778568	2.43139	0.0150412	0.0218532	Ferric iron ABC transporter%2C permease protein	NA	K02011	afuB, fbpB; iron(III) transport system permease protein	373	02010 02000	ABC transporters [PATH:ko02010], Transporters [BR:ko02000],	09131 09183	09130 09180
D|1136176.5.peg.488	1	552172	553200	+	1029	145.5	152	163.5	144.5	166	173	56	52	94.5	57	68.5	58.5	97.7113	106.358	115.057	106.19	109.759	112.956	84.8072	72.7369	123.574	87.4041	96.254	86.8391	99.9704	0.226534	0.11124	2.03645	0.0417057	0.0566406	Ferric iron ABC transporter%2C ATP-binding protein	NA	K02010	afuC, fbpC; iron(III) transport system ATP-binding protein [EC:7.2.2.7]	191	02010 02000	ABC transporters [PATH:ko02010], Transporters [BR:ko02000],	09131 09183	09130 09180
D|1136176.5.peg.489	1	553354	554766	-	1413	220	209	187	205	214	208	63	53	51	68	42	49	148.252	146.242	131.997	151.173	141.496	135.809	95.4082	74.1357	67.0453	104.272	59.451	73.3641	110.72	0.860022	0.111582	7.70754	1.28e-14	4.94e-14	GlcNAc phosphomutase (EC 5.4.2.3)	KEGG_ENZYME:5.4.2.3			327
D|1136176.5.peg.490	1	554841	557246	-	2406	553	490	465	478	526	498	120	139	146	145	121	130	372.651	342.863	328.229	352.49	347.79	325.158	181.73	194.431	191.934	222.344	171.275	194.639	268.795	0.840923	0.0735827	11.4283	3.02e-30	2.34e-29	Chitobiose phosphorylase (EC 2.4.1.-)	KEGG_ENZYME:2.4.1.-	K18675	chbP; N,N'-diacetylchitobiose phosphorylase [EC:2.4.1.280]	591	00520	Amino sugar and nucleotide sugar metabolism [PATH:ko00520],	09101	09100
D|1136176.5.peg.491	1	557374	559320	-	1947	214	219	196.5	192	204.5	211	71	79	76	70.5	74	50.5	144.208	153.239	138.35	141.586	134.884	137.768	107.523	110.504	99.9107	107.338	104.747	74.8613	121.243	0.489363	0.0964527	5.0736	3.9e-07	9.25e-07	Beta-N-acetylhexosaminidase%2C (GlcNAc)2 catabolism	NA	K12373	HEXA_B; hexosaminidase [EC:3.2.1.52]	271	00520 00513 00531 00603 00604 00511 04142 03110	Amino sugar and nucleotide sugar metabolism [PATH:ko00520], Various types of N-glycan biosynthesis [PATH:ko00513], Glycosaminoglycan degradation [PATH:ko00531], Glycosphingolipid biosynthesis - globo and isoglobo series [PATH:ko00603], Glycosphingolipid biosynthesis - ganglio series [PATH:ko00604], Other glycan degradation [PATH:ko00511], Lysosome [PATH:ko04142], Chaperones and folding catalysts …	09101 09107 09141 09182	09100 09140 09180
D|1136176.5.peg.492	1	559333	560217	-	885	118	111.5	96	104.5	106.5	105.5	16	27	32	20.5	18.5	28.5	79.5168	77.669	67.7633	76.6925	70.087	68.5573	24.2306	37.7673	42.0677	30.6681	25.479	41.9223	53.5351	1.11548	0.150045	7.43433	1.05e-13	3.8e-13	Glucosamine kinase GpsK (EC 2.7.1.8)	KEGG_ENZYME:2.7.1.8	K18676	gspK; glucosamine kinase [EC:2.7.1.8]	144	00520	Amino sugar and nucleotide sugar metabolism [PATH:ko00520],	09101	09100
D|1136176.5.peg.493	1	560220	561941	-	1722	297	274.5	253.5	285.5	293	264.5	60	63	71	81	48.5	47	200.14	191.723	178.585	210.167	193.731	172.373	90.8649	88.1236	93.3376	124.206	67.944	70.3696	140.13	1.1024	0.114423	9.6344	5.72e-22	3.27e-21	Glucosamine-link cellobiase (EC 3.2.1.21)	KEGG_ENZYME:3.2.1.21			296
D|1136176.5.peg.494	1	562039	563034	-	996	225	199	201	213	203	222	43	42	41	49	36	44	151.621	139.244	141.879	157.072	134.223	144.95	65.1199	58.7491	53.8992	75.1368	50.958	65.8779	103.228	1.23917	0.112697	10.9957	4.01e-28	2.87e-27	(GlcNAc)2 ABC transporter%2C ATP-binding component 2	NA	K02032	ddpF; peptide/nickel transport system ATP-binding protein	68	02024 02000	Quorum sensing [PATH:ko02024], Transporters [BR:ko02000],	09145 09183	09140 09180
D|1136176.5.peg.495	1	563122	564105	-	984	111	104	104.5	109	113.5	99	27	17.5	24	29	23	36	74.7997	72.7709	73.4103	80.3796	74.7154	64.6398	40.8892	23.7794	31.5507	44.4687	32.5565	53.9001	55.655	0.966756	0.14842	6.51367	7.33e-11	2.23e-10	(GlcNAc)2 ABC transporter%2C ATP-binding component 1	NA	K02031	ddpD; peptide/nickel transport system ATP-binding protein	243	02024 02000	Quorum sensing [PATH:ko02024], Transporters [BR:ko02000],	09145 09183	09140 09180
D|1136176.5.peg.496	1	564108	565133	-	1026	140.5	133	133.5	127.5	140.5	126.5	24	21.5	17.5	33.5	26.5	17	94.342	93.0628	93.8805	93.6533	92.5678	82.2688	36.346	29.3745	22.3484	50.6023	36.803	25.4528	62.5585	1.4639	0.148202	9.87774	5.2e-23	3.06e-22	(GlcNAc)2 ABC transporter%2C permease component 2	NA	K02034	ABC.PE.P1; peptide/nickel transport system permease protein	229	02024 02000	Quorum sensing [PATH:ko02024], Transporters [BR:ko02000],	09145 09183	09140 09180
D|1136176.5.peg.497	1	565136	566122	-	987	66.5	58	68	59.5	70	75.5	23	13	19.5	14.5	10.5	13	44.4755	40.5838	47.999	43.5082	46.2839	48.9695	34.8315	18.1842	24.9777	21.4677	14.155	19.4639	33.7417	1.03608	0.183364	5.65039	1.6e-08	4.22e-08	(GlcNAc)2 ABC transporter%2C permease component 1	NA	K02033	ABC.PE.P; peptide/nickel transport system permease protein	268	02024 02000	Quorum sensing [PATH:ko02024], Transporters [BR:ko02000],	09145 09183	09140 09180
D|1136176.5.peg.498	1	566292	567974	-	1683	860	968	988	882	1073	935	310	297	263	355	267	276	579.529	677.33	697.398	650.411	709.466	610.487	469.469	415.44	345.744	544.359	377.938	413.234	540.9	0.614975	0.100119	6.14247	8.12e-10	2.31e-09	(GlcNAc)2 ABC transporter%2C periplasmic substrate-binding protein	NA	K02035	ABC.PE.S; peptide/nickel transport system substrate-binding protein	463	02024 02000	Quorum sensing [PATH:ko02024], Transporters [BR:ko02000],	09145 09183	09140 09180
D|1136176.5.peg.499	1	568683	572072	-	3390	340	332	352	303	336	389	134	173	148	137	178	130	229.116	232.307	248.466	223.441	222.163	253.989	202.932	241.99	194.563	210.076	251.959	194.639	225.47	0.120432	0.0805458	1.4952	0.134861	0.168649	Chitin catabolic cascade sensor histidine kinase ChiS	NA	K19694	chiS; two-component system, sensor histidine kinase ChiS	511	01001 02022	Protein kinases [BR:ko01001], Two-component system [BR:ko02022],	09181 09183	09180
D|1136176.5.peg.500	1	572289	573311	-	1023	231	221	229	196	244	281	121	127	129	117	111	123	155.664	154.638	161.644	144.536	161.332	183.472	183.244	177.646	169.585	179.408	157.12	184.159	167.704	-0.125487	0.0840455	-1.49308	0.135416	0.169161	Ribosomal RNA small subunit methyltransferase C (EC 2.1.1.52)	KEGG_ENZYME:2.1.1.52	K00564	rsmC; 16S rRNA (guanine1207-N2)-methyltransferase [EC:2.1.1.172]	162	03009	Ribosome biogenesis [BR:ko03009],	09182	09180
D|1136176.5.peg.501	1	573422	574507	-	1086	587	575	566	614	608	698	246	273	313	263	310	257	395.562	402.339	399.521	452.78	402.009	455.743	372.546	381.869	411.474	403.285	438.805	384.787	408.393	0.0667823	0.0653765	1.0215	0.307016	0.353817	Predicted permease	NA			193
D|1136176.5.peg.502	1	574584	574709	+	126	57	40	47	46	58	53	12	12	13	10	7	22	38.4107	27.9888	33.1758	33.9217	38.3495	34.6051	18.173	16.7854	17.09	15.334	9.9085	32.939	26.3901	0.914644	0.208959	4.37714	1.2e-05	2.49e-05	D01200382: hypothetical protein	NA			NA
D|1136176.5.peg.503	1	574850	576145	-	1296	421	420	400	341	425	454	211	222	269	210	248	231	283.7	293.883	282.347	251.463	281.009	296.429	319.542	310.531	353.631	322.015	351.044	345.859	307.621	-0.245862	0.0650838	-3.77762	0.000158	0.000293	Glutamate-1-semialdehyde aminotransferase (EC 5.4.3.8)	KEGG_ENZYME:5.4.3.8	K01845	hemL; glutamate-1-semialdehyde 2,1-aminomutase [EC:5.4.3.8]	341	00860 01007	Porphyrin and chlorophyll metabolism [PATH:ko00860], Amino acid related enzymes [BR:ko01007],	09108 09181	09100 09180
D|1136176.5.peg.504	1	576442	576783	+	342	576	496	507	514	537	548	253	227	233	308	207	235	388.15	347.061	357.875	379.038	355.063	357.804	383.147	317.525	306.305	472.289	293.008	351.848	359.093	0.0433306	0.1019	0.425225	0.670673	0.714051	probable iron binding protein from the HesB_IscA_SufA family	NA	K15724	erpA; iron-sulfur cluster insertion protein	139	99996	General function prediction only,	09194	09190
D|1136176.5.peg.505	1	577125	578249	+	1125	430.5	389	406.5	386	425.5	434.5	190	202	190.5	165.5	231	178	289.765	272.191	286.582	284.647	281.009	283.37	287.739	282.555	249.777	253.012	326.98	266.506	280.344	0.0266708	0.0685619	0.389003	0.697274	0.737804	Membrane-fusion protein	NA	K18990	vexE; membrane fusion protein, multidrug efflux system	144	02000	Transporters [BR:ko02000],	09183	09180
D|1136176.5.peg.506	1	578260	581373	+	3114	899.5	873	871.5	822	924.5	917.5	286	325	365.5	289.5	348	318	605.81	610.856	614.811	606.165	610.947	598.734	433.123	454.606	479.834	443.154	492.594	476.118	535.563	0.390462	0.0484555	8.05816	7.74e-16	3.23e-15	RND multidrug efflux transporter%3B Acriflavin resistance protein	NA	K18989	vexF; multidrug efflux pump	750	02000	Transporters [BR:ko02000],	09183	09180
D|1136176.5.peg.507	1	581465	582754	-	1290	118	117	125	109	122	142	54	59	82	56	49	56	79.5168	81.8673	88.2335	80.3796	80.6662	92.7156	81.7784	82.5285	107.798	85.8707	69.3595	83.8446	84.5466	-0.0256089	0.111746	-0.22917	0.818737	0.845136	Peptidase%2C M23/M37 family	NA			217
D|1136176.5.peg.508	1	582884	584071	+	1188	810	747	725	664	765	746	597	559	580	557	570	515	545.836	522.691	511.754	489.652	505.817	487.084	904.106	781.922	762.476	854.106	806.835	771.071	661.946	-0.67081	0.0551132	-12.1715	4.41e-34	3.91e-33	Tyrosyl-tRNA synthetase (EC 6.1.1.1)	KEGG_ENZYME:6.1.1.1	K01866	YARS, tyrS; tyrosyl-tRNA synthetase [EC:6.1.1.1]	319	00970 01007 03016 03029	Aminoacyl-tRNA biosynthesis [PATH:ko00970], Amino acid related enzymes [BR:ko01007], Transfer RNA biogenesis [BR:ko03016], Mitochondrial biogenesis [BR:ko03029],	09122 09181 09182	09120 09180
D|1136176.5.peg.509	1	584496	585341	+	846	364	392	356	344	337	370	51	78	64	77	69	53	245.289	274.29	251.289	253.675	222.824	241.583	77.2352	109.105	84.1353	118.072	97.6695	79.353	171.21	1.39672	0.102059	13.6854	1.24e-42	1.51e-41	Mg/Co/Ni transporter MgtE / CBS domain	NA	K06213	mgtE; magnesium transporter	65	02000	Transporters [BR:ko02000],	09183	09180
D|1136176.5.peg.510	1	585468	586901	-	1434	176	178	175	194	221	199	141	155	157	134	154	121	118.601	124.55	123.527	143.061	146.125	129.932	213.533	216.812	206.394	205.476	217.987	181.164	168.93	-0.660829	0.0838896	-7.87736	3.34e-15	1.35e-14	D-alanyl-D-alanine carboxypeptidase (EC 3.4.16.4)	KEGG_ENZYME:3.4.16.4	K07259	dacB; serine-type D-Ala-D-Ala carboxypeptidase/endopeptidase (penicillin-binding protein 4) [EC:3.4.16.4 3.4.21.-]	179	00550 01002 01011	Peptidoglycan biosynthesis [PATH:ko00550], Peptidases and inhibitors [BR:ko01002], Peptidoglycan biosynthesis and degradation proteins [BR:ko01011],	09107 09181	09100 09180
D|1136176.5.peg.511	1	587017	588069	-	1053	50045	49961	50272	45261	52155	50960	56591	41636	35895	32511	33228	35122	33723.9	34958.7	35485.4	33376.7	34484.8	33273.2	85702.3	58239.9	47188.1	49852.5	47034.2	52585.6	45492.1	-0.730329	0.13194	-5.53531	3.11e-08	7.99e-08	Outer membrane protein OmpU	NA			NA
D|1136176.5.peg.512	1	588583	589056	+	474	467	470	445	407	483	451	249	280	305	304	310	287	314.698	328.869	314.111	300.133	319.359	294.47	377.089	391.66	400.957	466.155	438.805	429.704	364.668	-0.419104	0.0629143	-6.6615	2.71e-11	8.51e-11	Transcription elongation factor GreA	NA	K03624	greA; transcription elongation factor GreA	132	03021	Transcription machinery [BR:ko03021],	09182	09180
D|1136176.5.peg.513	1	589191	589487	-	297	4452	4137	3868	3770	4061	4286	2705	2703	2964	2710	2486	2245	3000.08	2894.74	2730.3	2780.1	2685.13	2798.45	4096.49	3780.92	3896.52	4155.53	3518.93	3361.27	3308.2	-0.433487	0.0579086	-7.48571	7.12e-14	2.61e-13	D004454: RNA binding protein	NA	K07574	yhbY; RNA-binding protein	73	03009	Ribosome biogenesis [BR:ko03009],	09182	09180
D|1136176.5.peg.514	1	589602	590231	+	630	8466	7817	7747	7805	8426	8418	4167	4205	4285	4083	3663	3601	5704.99	5469.72	5468.36	5755.62	5571.26	5496.34	6310.57	5881.9	5633.12	6260.89	5184.97	5391.51	5677.44	-0.0505353	0.0520859	-0.97023	0.331932	0.379982	Heat shock protein FtsJ/RrmJ @ Ribosomal RNA large subunit methyltransferase E (EC 2.1.1.-)	KEGG_ENZYME:2.1.1.-	K02427	rlmE, rrmJ, ftsJ; 23S rRNA (uridine2552-2'-O)-methyltransferase [EC:2.1.1.166]	169	03009	Ribosome biogenesis [BR:ko03009],	09182	09180
D|1136176.5.peg.515	1	590330	592303	+	1974	18465	16724	16787	16170	17957	18101	10657	10067	10663	9635	9634	9495	12443	11702.1	11849.4	11924.2	11873.1	11818.6	16139.1	14081.6	14017.7	14774.4	13636.9	14216.2	13206.4	-0.278512	0.0423498	-6.57646	4.82e-11	1.48e-10	Cell division protein FtsH (EC 3.4.24.-)	KEGG_ENZYME:3.4.24.-	K03798	ftsH, hflB; cell division protease FtsH [EC:3.4.24.-]	512	01002 03110	Peptidases and inhibitors [BR:ko01002], Chaperones and folding catalysts [BR:ko03110],	09181 09182	09180
D|1136176.5.peg.516	1	592392	593222	+	831	229	228	208	222	230.5	215	84	87	102	92.5	90	82	154.317	159.536	146.821	163.709	152.076	140.379	127.211	121.695	134.091	141.073	127.395	122.772	140.923	0.24288	0.0869871	2.79214	0.00523605	0.00805627	Dihydropteroate synthase (EC 2.5.1.15)	KEGG_ENZYME:2.5.1.15	K00796	folP; dihydropteroate synthase [EC:2.5.1.15]	179	00790	Folate biosynthesis [PATH:ko00790],	09108	09100
D|1136176.5.peg.517	1	593244	594584	+	1341	773	732	752	717	743.5	743	251	319	353	250.5	335	309	520.903	512.196	530.813	528.735	491.27	485.125	380.118	446.213	464.059	383.351	474.192	462.643	473.301	0.230667	0.0640015	3.60409	0.000313	0.000562	Phosphoglucosamine mutase (EC 5.4.2.10)	KEGG_ENZYME:5.4.2.10	K03431	glmM; phosphoglucosamine mutase [EC:5.4.2.10]	337	00520	Amino sugar and nucleotide sugar metabolism [PATH:ko00520],	09101	09100
D|1136176.5.peg.518	1	594862	595194	+	333	170	170	148	153	169	171	78	96	76	61	88	100	114.558	118.953	104.468	112.826	111.743	111.651	118.124	134.284	99.9107	93.5377	124.564	149.723	116.195	-0.094046	0.103075	-0.9124	0.361558	0.409854	Preprotein translocase subunit SecG (TC 3.A.5.1.1)	NA	K03075	secG; preprotein translocase subunit SecG	76	03060 03070 02024 02044	Protein export [PATH:ko03060], Bacterial secretion system [PATH:ko03070], Quorum sensing [PATH:ko02024], Secretion system [BR:ko02044],	09123 09131 09145 09183	09120 09130 09140 09180
D|1136176.5.peg.519	1	595660	596115	+	456	2003	1946	1776	1784	1973	1978	544	650	595	647	604	649	1349.76	1361.66	1253.62	1315.57	1304.54	1291.49	823.842	909.212	782.196	992.113	854.962	971.699	1100.89	0.563625	0.0588759	9.57311	1.04e-21	5.85e-21	D000325: clustered with transcription termination protein NusA	NA	K09748	rimP; ribosome maturation factor RimP	143	03009	Ribosome biogenesis [BR:ko03009],	09182	09180
D|1136176.5.peg.520	1	596151	597638	+	1488	9572.5	9208	8709	7979.5	9435.5	9329.5	3028	3197.5	3459	3061	3188.5	3577.5	6450.3	6443.03	6147.41	5883.93	6238.41	6091.16	4585.65	4471.92	4547.25	4693.75	4512.61	5355.58	5451.75	0.403624	0.0492896	8.18883	2.64e-16	1.13e-15	Transcription termination protein NusA	NA	K02600	nusA; transcription termination/antitermination protein NusA	399	03021 03009	Transcription machinery [BR:ko03021], Ribosome biogenesis [BR:ko03009],	09182	09180
D|1136176.5.peg.521	1	597661	600351	+	2691	17302.5	16716	15726	15148.5	16934.5	16602.5	5049	5392.5	6345	5012	5770.5	5790.5	11659.3	11696.5	11100.5	11170.6	11196.7	10839.9	7646.28	7542.26	8341.23	7685.42	8167.43	8668.94	9642.92	0.493722	0.0419442	11.7709	5.51e-32	4.5e-31	Translation initiation factor 2	NA	K02519	infB, MTIF2; translation initiation factor IF-2	626	03012 03029	Translation factors [BR:ko03012], Mitochondrial biogenesis [BR:ko03029],	09182	09180
D|1136176.5.peg.522	1	600486	600899	+	414	3408.5	3286	3215	3052	3392	3349	865.5	822.5	1023.5	874.5	880.5	791	2296.55	2299.28	2269.37	2250.63	2242.78	2186.65	1309.97	1149.8	1344.85	1340.2	1245.64	1184.31	1760	0.838489	0.0433775	19.33	3e-83	9.82e-82	Ribosome-binding factor A	NA	K02834	rbfA; ribosome-binding factor A	107	03009	Ribosome biogenesis [BR:ko03009],	09182	09180
D|1136176.5.peg.523	1	600899	601852	+	954	3899.5	3751	3783	3547	3931	3951	1319.5	1208.5	1564.5	1294.5	1357.5	1344	2627.42	2624.65	2670.3	2615.66	2599.17	2579.71	1997.51	1689.74	2056.06	1984.23	1920.83	2012.27	2281.46	0.430806	0.0448767	9.59976	8.01e-22	4.55e-21	tRNA pseudouridine synthase B (EC 4.2.1.70)	KEGG_ENZYME:4.2.1.70	K03177	truB, PUS4, TRUB1; tRNA pseudouridine55 synthase [EC:5.4.99.25]	222	03016	Transfer RNA biogenesis [BR:ko03016],	09182	09180
D|1136176.5.peg.524	1	602071	602340	+	270	1884	1903	1529	1573	1650	1814	277	362	498	303	451	496	1269.57	1331.57	1079.27	1159.97	1090.98	1184.41	419.493	506.361	654.678	464.622	638.39	742.624	878.495	1.05379	0.127476	8.2666	1.38e-16	5.98e-16	SSU ribosomal protein S15p (S13e)	NA	K02956	RP-S15, MRPS15, rpsO; small subunit ribosomal protein S15	106	03010 03011	Ribosome [PATH:ko03010], Ribosome [BR:ko03011],	09122 09182	09120 09180
D|1136176.5.peg.525	1	602720	604840	+	2121	1787	1784	1601	1556	1777	1756	892	1021	1156	749	1183	1122	1204.21	1248.3	1130.09	1147.44	1174.95	1146.54	1350.86	1428.16	1519.69	1148.52	1674.54	1679.89	1321.1	-0.320207	0.0850601	-3.76448	0.000167	0.000308	Polyribonucleotide nucleotidyltransferase (EC 2.7.7.8)	KEGG_ENZYME:2.7.7.8	K00962	pnp, PNPT1; polyribonucleotide nucleotidyltransferase [EC:2.7.7.8]	566	03018 03019 03016	RNA degradation [PATH:ko03018], Messenger RNA biogenesis [BR:ko03019], Transfer RNA biogenesis [BR:ko03016],	09123 09182	09120 09180
D|1136176.5.peg.526	1	604965	605903	+	939	224	223	217	230	239	221	193	188	231	146	243	185	150.947	156.038	153.173	169.608	158.026	144.297	292.282	262.972	303.676	223.877	343.966	276.987	219.654	-0.873043	0.0923006	-9.45869	3.12e-21	1.73e-20	Lipoprotein nlpI precursor	NA	K05803	nlpI; lipoprotein NlpI	136	99992	Structural proteins,	09193	09190
D|1136176.5.peg.527	1	606020	606451	+	432	131	125	143	143	155	158	67	61	69	69	77	42	88.2771	87.4651	100.939	105.452	102.486	103.162	101.466	85.326	90.7084	105.805	108.993	62.8835	95.247	0.082502	0.115811	0.712384	0.476227	0.525344	Transcriptional regulator%2C MarR family	NA			18
D|1136176.5.peg.528	1	606539	607876	+	1338	916	873	943	974	920	999	233	255	235	259	235	247	617.266	610.856	665.634	718.254	608.302	652.274	352.859	356.691	308.934	397.152	332.642	369.815	499.223	0.872543	0.0700121	12.4627	1.19e-35	1.13e-34	Multi antimicrobial extrusion protein (Na(+)/drug antiporter)%2C MATE family of MDR efflux pumps	NA			189
D|1136176.5.peg.529	1	607963	608853	-	891	29	36	32	28	43	57	17	18	19	14	28.5	25	19.5423	25.1899	22.5878	20.648	28.4315	37.2168	25.7451	25.1782	24.9777	21.4677	39.634	37.4306	27.3375	-0.178432	0.209671	-0.851009	0.394764	0.443167	D139928: Putative protease	NA			292
D|1136176.5.peg.530	1	608860	609873	-	1014	115	97	97	97	91	106	28	28	60	40	49.5	43	77.4952	67.8729	68.4692	71.5305	60.169	69.2103	42.4036	39.166	78.8769	61.3362	69.3595	64.3807	64.1892	0.216649	0.142671	1.51852	0.128884	0.16196	D139552: Putative protease	NA	K08303	K08303; putative protease [EC:3.4.-.-]	311	05120 01002	Epithelial cell signaling in Helicobacter pylori infection [PATH:ko05120], Peptidases and inhibitors [BR:ko01002],	09171 09181	09160 09180
D|1136176.5.peg.531	1	610051	612090	-	2040	476	499	477	437	531	518	247	245	281	217	299	210	320.763	349.161	336.699	322.256	351.096	338.216	374.061	342.703	369.407	332.749	423.234	314.417	347.897	-0.0968189	0.0697134	-1.38881	0.16489	0.201904	diguanylate cyclase/phosphodiesterase (GGDEF & EAL domains) with PAS/PAC sensor(s)	NA			75
D|1136176.5.peg.532	1	612349	612876	+	528	74.5	82	72	78	85.5	83.5	16	22.5	22.5	22.5	34	29.5	49.8665	57.3771	50.8225	57.5193	56.2018	54.1929	24.2306	30.7733	28.9215	33.7349	48.127	43.4195	44.5989	0.640348	0.154477	4.14526	3.39e-05	6.71e-05	D138517: Putative lipid carrier protein	NA			90
D|1136176.5.peg.533	1	612860	613363	+	504	151.5	171	147	134	145.5	141.5	79	46.5	56.5	52.5	73	54.5	101.755	119.652	103.763	98.8153	95.8737	92.0627	119.639	64.3442	73.6184	79.737	103.331	80.8502	94.4534	0.233889	0.130629	1.79048	0.0733764	0.0957585	D002208: Acetyltransferase (EC 2.3.1.-)	KEGG_ENZYME:2.3.1.-	K03824	yhbS; putative acetyltransferase [EC:2.3.1.-]	88	99980	Enzymes with EC numbers,	09191	09190
D|1136176.5.peg.534	1	613523	613921	+	399	155	146	143	131.5	142	161.5	64.5	69	60.5	62	64.5	62.5	104.45	102.159	100.939	96.603	93.8901	105.121	96.9226	96.5163	78.8769	95.0711	90.592	92.828	96.1641	0.134878	0.10123	1.33239	0.182733	0.221822	DNA polymerase III psi subunit (EC 2.7.7.7)	KEGG_ENZYME:2.7.7.7	K02344	holD; DNA polymerase III subunit psi [EC:2.7.7.7]	30	03030 03430 03440 03032 03400	DNA replication [PATH:ko03030], Mismatch repair [PATH:ko03430], Homologous recombination [PATH:ko03440], DNA replication proteins [BR:ko03032], DNA repair and recombination proteins [BR:ko03400],	09124 09182	09120 09180
D|1136176.5.peg.535	1	613914	614369	+	456	66	65	62	59.5	65	73.5	35.5	43	56.5	31	43.5	38.5	44.4755	45.4818	43.7638	43.5082	42.9779	47.6637	53.0045	60.1479	73.6184	47.5355	60.8665	56.8946	51.6615	-0.401951	0.133535	-3.01009	0.00261168	0.00417617	Ribosomal-protein-S18p-alanine acetyltransferase (EC 2.3.1.-)	KEGG_ENZYME:2.3.1.-	K03789	rimI; [ribosomal protein S18]-alanine N-acetyltransferase [EC:2.3.1.266]	65	03009	Ribosome biogenesis [BR:ko03009],	09182	09180
D|1136176.5.peg.536	1	614542	616122	+	1581	477	485	424	401	495	497	183	153	176	163	178	171	321.437	339.365	299.288	295.708	327.293	324.505	277.138	214.014	231.372	249.945	251.959	256.026	282.337	0.369145	0.071535	5.16034	2.46e-07	5.94e-07	Peptide chain release factor 3	NA	K02837	prfC; peptide chain release factor 3	467	03012	Translation factors [BR:ko03012],	09182	09180
D|1136176.5.peg.537	1	616227	616382	+	156	119	116.5	126.5	134	131.5	132.5	21	23	25	11.5	20.5	13	80.1907	81.1676	88.9394	98.8153	86.617	86.1864	31.8027	32.1721	32.8654	16.8674	28.31	19.4639	56.9498	1.67981	0.159929	10.5035	8.33e-26	5.5e-25	D01200185: hypothetical protein	NA			9
D|1136176.5.peg.538	1	616363	617193	+	831	416	447.5	506.5	443	480.5	529.5	130	149	170	152.5	160.5	152	280.33	312.775	357.169	326.68	317.375	345.398	196.874	208.419	223.484	233.077	226.48	227.578	271.304	0.559496	0.079453	7.04185	1.9e-12	6.34e-12	Putative deoxyribonuclease YjjV	NA	K03424	tatD; TatD DNase family protein [EC:3.1.21.-]	133	99980	Enzymes with EC numbers,	09191	09190
D|1136176.5.peg.539	1	617410	618660	+	1251	16412	17628	15660	13978	16602	17374	4709	5603	6981	4271	6944	6481	11059.6	12334.7	11053.9	10307.8	10977.2	11344	7131.38	7837.41	9177.32	6549.17	9829.23	9703.52	9775.43	0.417262	0.101921	4.09397	4.24e-05	8.3e-05	Nucleoside permease NupC	NA	K03317	TC.CNT; concentrative nucleoside transporter, CNT family	291	99977	Transport,	09193	09190
D|1136176.5.peg.540	1	619181	619957	+	777	19467	19300	19999	18483	21514	20679	7575	9058	9655	8759	9085	8408	13118.3	13504.6	14116.7	13629.9	14225	13501.9	11471.7	12670.2	12692.6	13431.1	12859.8	12588.7	13150.9	0.116735	0.039824	2.93127	0.00337575	0.00530656	Deoxyribose-phosphate aldolase (EC 4.1.2.4)	KEGG_ENZYME:4.1.2.4	K01619	deoC, DERA; deoxyribose-phosphate aldolase [EC:4.1.2.4]	221	00030	Pentose phosphate pathway [PATH:ko00030],	09101	09100
D|1136176.5.peg.541	1	620068	621396	+	1329	6198	6188	5960	5248	6194	6167	1690	1749	2314	1844	2118	2240	4176.65	4329.87	4206.97	3870.02	4095.46	4026.6	2559.36	2446.48	3042.02	2827.6	2998.03	3353.79	3494.4	0.520128	0.0728808	7.13669	9.56e-13	3.28e-12	Thymidine phosphorylase (EC 2.4.2.4)	KEGG_ENZYME:2.4.2.4	K00758	deoA, TYMP; thymidine phosphorylase [EC:2.4.2.4]	329	00240 00983 05219	Pyrimidine metabolism [PATH:ko00240], Drug metabolism - other enzymes [PATH:ko00983], Bladder cancer [PATH:ko05219],	09104 09111 09162	09100 09160
D|1136176.5.peg.542	1	621464	622693	+	1230	11974	11894	11343	10428	12019	11983	2447	2787	3439	2516	3206	3037	8068.94	8322.48	8006.66	7689.89	7946.94	7824.02	3705.77	3898.42	4520.96	3858.05	4538.09	4547.07	6077.27	0.932709	0.0604358	15.433	9.81e-54	1.69e-52	Phosphopentomutase (EC 5.4.2.7)	KEGG_ENZYME:5.4.2.7	K01839	deoB; phosphopentomutase [EC:5.4.2.7]	365	00030 00230	Pentose phosphate pathway [PATH:ko00030], Purine metabolism [PATH:ko00230],	09101 09104	09100
D|1136176.5.peg.543	1	622757	623476	+	720	1250	1304	1235	1197	1378	1353	353	390	461	266	394	356	842.339	912.436	871.747	882.701	911.131	883.41	534.589	545.527	606.037	407.886	557.707	533.012	707.377	0.733682	0.0729714	10.0544	8.79e-24	5.32e-23	Purine nucleoside phosphorylase (EC 2.4.2.1)	KEGG_ENZYME:2.4.2.1	K03784	deoD; purine-nucleoside phosphorylase [EC:2.4.2.1]	231	00230 00240 00760	Purine metabolism [PATH:ko00230], Pyrimidine metabolism [PATH:ko00240], Nicotinate and nicotinamide metabolism [PATH:ko00760],	09104 09108	09100
D|1136176.5.peg.544	1	623604	624215	-	612	189	164	149	163	174	201	113	112	118	127	108	88	127.362	114.754	105.174	120.201	115.048	131.238	171.129	156.664	155.124	194.742	152.874	131.756	139.672	-0.42795	0.0965787	-4.4311	9.38e-06	1.96e-05	Lipoate-protein ligase A	NA	K07186	smp; membrane protein	22	99995	Signaling proteins,	09193	09190
D|1136176.5.peg.545	1	624324	625304	+	981	1430	1269	1343	1275	1417	1419	676	673	716	727	616	703	963.636	887.945	947.981	940.22	936.918	926.503	1023.74	941.384	941.264	1114.79	871.948	1052.55	962.407	-0.0842153	0.0577711	-1.45774	0.144912	0.179909	Phosphoserine phosphatase (EC 3.1.3.3)	KEGG_ENZYME:3.1.3.3	K01079	serB, PSPH; phosphoserine phosphatase [EC:3.1.3.3]	171	00680 00260 01009	Methane metabolism [PATH:ko00680], Glycine, serine and threonine metabolism [PATH:ko00260], Protein phosphatases and associated proteins [BR:ko01009],	09102 09105 09181	09100 09180
D|1136176.5.peg.546	1	625411	627759	-	2349	1128	1068	1096	967	1128	1230	456	488	547	463	502	447	760.127	747.302	773.631	713.092	745.832	803.1	690.573	682.608	719.094	709.966	710.581	669.26	727.097	0.119537	0.046008	2.59817	0.00937214	0.0139799	D01200899: hypothetical protein	NA			222
D|1136176.5.peg.547	1	627921	629300	+	1380	611	611	539	537	618	672	363	405	408	346	353	324	411.735	427.529	380.463	395.999	408.621	438.767	549.733	566.509	536.363	530.558	499.671	485.101	469.254	-0.362813	0.0578019	-6.27683	3.46e-10	1e-09	DNA repair protein RadA	NA	K04485	radA, sms; DNA repair protein RadA/Sms	391	03400	DNA repair and recombination proteins [BR:ko03400],	09182	09180
D|1136176.5.peg.548	1	629535	631622	+	2088	41644	43328	38050	34189	40567	41739	9759	11585	14394	10197	13603	14410	28062.7	30317.5	26858.3	25211.9	26822.8	27252.5	14779.2	16205	18922.6	15636.1	19255	21575	22574.9	0.629165	0.0917055	6.86071	6.85e-12	2.22e-11	Translation elongation factor G paralog	NA	K02355	fusA, GFM, EFG; elongation factor G	607	03012 03029	Translation factors [BR:ko03012], Mitochondrial biogenesis [BR:ko03029],	09182	09180
D|1136176.5.peg.549	1	631865	632716	-	852	7586	7254	7257	6807.5	7823	7603	3317	3585	3471	3519	3164.5	2885.5	5111.99	5075.77	5122.49	5019.67	5172.55	4964.2	5023.32	5014.65	4563.03	5396.05	4478.64	4319.5	4938.49	0.0815864	0.0539709	1.51167	0.130617	0.163871	D01201196: hypothetical protein	NA			7
D|1136176.5.peg.550	1	632720	635110	-	2391	5067.5	4996	5053	4713.5	5340	5307	2099	2563.5	2523	2280.5	2510	2334.5	3414.51	3495.8	3566.75	3475.5	3530.8	3465.08	3178.76	3585.09	3316.77	3496.16	3552.9	3494.52	3464.39	0.0224392	0.0339991	0.659992	0.509259	0.557937	P pilus assembly protein%2C porin PapC	NA	K07347	fimD, fimC, mrkC, htrE, cssD; outer membrane usher protein	109	05133 02000 02044 02035	Pertussis [PATH:ko05133], Transporters [BR:ko02000], Secretion system [BR:ko02044], Bacterial motility proteins [BR:ko02035],	09171 09183	09160 09180
D|1136176.5.peg.551	1	635121	635801	-	681	3118.5	3054	3094	2988	3240	3373	1078	1508.5	1556	1450.5	1572.5	1490	2101.13	2136.95	2183.96	2203.43	2142.28	2202.32	1632.54	2109.37	2045.54	2223.44	2225.17	2230.87	2119.75	0.056977	0.0700689	0.813156	0.416129	0.464567	P pilus assembly protein%2C chaperone PapD	NA	K07346	fimC; fimbrial chaperone protein	33	03110 02044 02035	Chaperones and folding catalysts [BR:ko03110], Secretion system [BR:ko02044], Bacterial motility proteins [BR:ko02035],	09182 09183	09180
D|1136176.5.peg.552	1	635891	636475	-	585	8462	8009	8174	7474	9043	9119	3937	4858	4701	4734	4768	4032	5702.3	5604.06	5769.77	5511.53	5979.22	5954.04	5962.25	6795.31	6180	7259.14	6749.1	6036.81	6125.29	-0.175279	0.0537771	-3.25936	0.00111663	0.00187941	D01201080: hypothetical protein	NA			2
D|1136176.5.peg.553	1	636666	637304	-	639	4549	4815	5115	4453	5225	5219	2232	2410	2611	2799	2417	2471	3065.44	3369.15	3610.52	3283.76	3454.76	3407.63	3380.17	3371.08	3432.46	4292	3421.26	3699.64	3482.32	-0.0968279	0.0672888	-1.43899	0.150153	0.185767	D01204607: hypothetical protein	NA			14
D|1136176.5.peg.554	1	637536	637751	-	216	188	190	196	172	182	200	159	151	150	164	135	141	126.688	132.947	138.35	126.838	120.338	130.585	240.792	211.217	197.192	251.478	191.092	211.109	173.219	-0.744776	0.0843209	-8.83263	1.02e-18	5e-18	hypothetical protein	NA			64
D|1136176.5.peg.555	1	637791	638747	-	957	321	310	334	315	318	317	182	190	182	188	154	138	216.313	216.913	235.76	232.29	210.261	206.978	275.624	265.77	239.26	288.28	217.987	206.617	234.338	-0.179226	0.0840303	-2.13287	0.0329354	0.0453803	putative transcriptional regulator%2C LysR family	NA	K03566	gcvA; LysR family transcriptional regulator, glycine cleavage system transcriptional activator	76	02026 03000	Biofilm formation - Escherichia coli [PATH:ko02026], Transcription factors [BR:ko03000],	09145 09182	09140 09180
D|1136176.5.peg.556	1	638851	639057	+	207	98	103	85	79	113	101	90	71	124	87	90	66	66.0394	72.0712	59.9988	58.2568	74.7154	65.9456	136.297	99.3139	163.012	133.406	127.395	98.8169	96.2724	-0.934317	0.127791	-7.31126	2.65e-13	9.37e-13	D01202669: hypothetical protein	NA			17
D|1136176.5.peg.557	1	639113	639256	-	144	270	261	306	317	364	340	177	256	182	164	214	143	181.945	182.627	215.996	233.764	240.676	221.995	268.051	358.09	239.26	251.478	302.917	214.103	242.575	-0.356379	0.12281	-2.90187	0.00370943	0.00580747	Transcriptional regulator	NA			NA
D|1136176.5.peg.558	1	639404	641092	-	1689	14839	14184	15557	14397	16688	15928	13643	14073	13340	13348	13156	12041	9999.58	9924.84	10981.2	10616.7	11034.1	10399.8	20661.2	19685.1	17537	20467.9	18622.3	18028.1	14829.8	-0.869173	0.0519619	-16.7271	8.32e-63	1.77e-61	Long-chain-fatty-acid--CoA ligase (EC 6.2.1.3)	KEGG_ENZYME:6.2.1.3	K01897	ACSL, fadD; long-chain acyl-CoA synthetase [EC:6.2.1.3]	300	00061 00071 04146 04216 02024 04920 03320 04714 01004 04147	Fatty acid biosynthesis [PATH:ko00061], Fatty acid degradation [PATH:ko00071], Peroxisome [PATH:ko04146], Ferroptosis [PATH:ko04216], Quorum sensing [PATH:ko02024], Adipocytokine signaling pathway [PATH:ko04920], PPAR signaling pathway [PATH:ko03320], Thermogenesis [PATH:ko04714], Lipid biosynthesis proteins [BR:ko01004], Exosome [BR:ko04147],	09103 09141 09143 09145 09152 09159 09181 09183	09100 09140 09150 09180
D|1136176.5.peg.559	1	641180	641923	-	744	1930	1884	1940	1861	2088	2059	1220	1344	1336	1261	1131	1229	1300.57	1318.27	1369.38	1372.35	1380.58	1344.38	1847.59	1879.97	1756.32	1933.62	1600.93	1840.09	1578.67	-0.424904	0.0466899	-9.10056	8.99e-20	4.66e-19	Transcriptional regulator%2C AraC family	NA			5
D|1136176.5.peg.560	1	642119	642307	+	189	39258	37723	39432	38078	43818	40263	9768	11617	7645	13493	9689	8173	26454.8	26395.6	27833.8	28079.8	28972.4	26288.8	14792.8	16249.7	10050.2	20690.2	13714.8	12236.8	20980	0.902739	0.137159	6.58168	4.65e-11	1.43e-10	D01200762: hypothetical protein	NA	K02651	flp, pilA; pilus assembly protein Flp/PilA	14	04112 02044 02035	Cell cycle - Caulobacter [PATH:ko04112], Secretion system [BR:ko02044], Bacterial motility proteins [BR:ko02035],	09143 09183	09140 09180
D|1136176.5.peg.561	1	642476	643006	+	531	17576	20413	22687	17043	24479	22017	22037	21611	21516	28469	22235	19512	11844	14283.4	16014	12568	16185.5	14375.5	33373.2	30229.2	28285.2	43654.5	31473.6	29213.9	23458.3	-1.2024	0.115212	-10.4365	1.69e-25	1.1e-24	ABC-type uncharacterized transport system%2C permease component	NA			NA
D|1136176.5.peg.562	1	643044	644393	+	1350	7841	8539.5	9046	7673	9743	8908	8191.5	7424.5	7648.5	9876.5	7830	7429.5	5283.83	5974.91	6385.28	5658.28	6442.05	5816.27	12404.6	10384.6	10054.2	15143.9	11083.4	11122.9	8812.84	-0.980975	0.0979075	-10.0194	1.25e-23	7.52e-23	Predicted ATPase with chaperone activity%2C associated with Flp pilus assembly	NA			132
D|1136176.5.peg.563	1	644386	645135	+	750	7443	7483	8402	7917	9038.5	8179.5	3848	4442.5	3999.5	5140	4483.5	3793.5	5015.62	5236.01	5930.7	5838.21	5975.91	5340.29	5827.47	6213.41	5257.14	7881.7	6345.68	5678.98	5878.43	-0.158264	0.0923684	-1.7134	0.0866384	0.111746	Flp pilus assembly protein RcpC/CpaB	NA	K02279	cpaB, rcpC; pilus assembly protein CpaB	70	02044 02035	Secretion system [BR:ko02044], Bacterial motility proteins [BR:ko02035],	09183	09180
D|1136176.5.peg.564	1	645144	646598	+	1455	34627.5	34060.5	37339.5	34052.5	39816	36618	18039	16573.5	15172.5	21199.5	16529	14517.5	23334.1	23832.5	26356.4	25110.9	26326.3	23908.9	27318.5	23182.1	19945.3	32506.6	23396.8	21735.2	24746.1	0.00765657	0.105477	0.0725901	0.942132	0.953221	Type II/IV secretion system secretin RcpA/CpaC%2C associated with Flp pilus assembly	NA	K02280	cpaC, rcpA; pilus assembly protein CpaC	204	02044 02035	Secretion system [BR:ko02044], Bacterial motility proteins [BR:ko02035],	09183	09180
D|1136176.5.peg.565	1	646609	646857	+	249	7824.5	6996.5	8207	7467.5	8670.5	8163.5	3607	3300	2832	4373.5	3214.5	2591	5272.37	4895.25	5793.06	5506.37	5732.59	5329.84	5462.5	4616	3722.99	6705.58	4549.42	3879.31	5122.11	0.169034	0.12768	1.32388	0.185543	0.224763	D01201118: hypothetical protein	NA			3
D|1136176.5.peg.566	1	646874	648142	+	1269	34065.5	32442.5	35992	34051	37731	35531.5	13152.5	12262	10443.5	16612.5	11553	9520	22955.4	22700.3	25405.6	25110.1	24947.7	23199.1	19917.6	17151.9	13728.5	25472.9	16353.3	14253.6	20933	0.433328	0.131972	3.28348	0.00102534	0.00173456	Von Willebrand factor type A domain protein%2C associated with Flp pilus assembly	NA			11
D|1136176.5.peg.567	1	648145	648573	+	429	7926	7972	8479.5	8121	8799	8304.5	3236	2865.5	2706	3826	2680.5	2259.5	5341.1	5578.17	5985.06	5988.65	5817.88	5421.91	4900.65	4007.53	3557.35	5866.81	3793.54	3382.23	4970.07	0.42035	0.12238	3.43478	0.000593	0.00103142	Similar to TadZ/CpaE%2C associated with Flp pilus assembly	NA			12
D|1136176.5.peg.568	1	648573	649064	+	492	7103	6805.5	7753.5	7031	7745.5	7563.5	2923	2903	2420.5	3851	2686.5	2085.5	4786.51	4761.6	5472.6	5184.85	5120.98	4938.09	4426.64	4060.68	3181.37	5905.14	3802.03	3121.72	4563.52	0.305131	0.134932	2.26137	0.0237362	0.0334904	Similar to TadZ/CpaE%2C associated with Flp pilus assembly	NA			14
D|1136176.5.peg.569	1	649088	650302	+	1215	20786.5	20223.5	21581.5	20276	22451.5	21330.5	9564	8104	6944.5	10800	7617	6253.5	14007.1	14150.5	15233.3	14952.1	14844.6	13926.9	14483.9	11335.8	9128.68	16560.8	10781.9	9362.15	13230.6	0.281937	0.134454	2.09691	0.0360016	0.0493123	Type II/IV secretion system ATPase TadZ/CpaE%2C associated with Flp pilus assembly	NA	K02282	cpaE, tadZ; pilus assembly protein CpaE	62	02044 02035	Secretion system [BR:ko02044], Bacterial motility proteins [BR:ko02035],	09183	09180
D|1136176.5.peg.570	1	650336	651787	+	1452	20494	19857.5	20947.5	19840.5	22450	21227	10632	9165	7902	11970	8457.5	7098.5	13810.3	13894.4	14785.8	14630.6	14843.9	13859.7	16101.3	12819.9	10388.1	18354.9	11970.9	10627.3	13840.6	0.0967207	0.129538	0.746661	0.455268	0.504501	Type II/IV secretion system ATP hydrolase TadA/VirB11/CpaF%2C TadA subfamily	NA	K02283	cpaF, tadA; pilus assembly protein CpaF [EC:7.4.2.8]	224	02044 02035	Secretion system [BR:ko02044], Bacterial motility proteins [BR:ko02035],	09183	09180
D|1136176.5.peg.571	1	651797	652762	+	966	14427.5	14129	15621.5	14265	16372.5	15562	7803	6988.5	5779	8810	6330	4790.5	9721.94	9886.35	11026.4	10519.4	10825.1	10160.9	11817	9774.73	7597.16	13509.3	8960.11	7171.71	10080.8	0.0790286	0.138365	0.571161	0.56789	0.615922	Flp pilus assembly protein TadB	NA	K12510	tadB; tight adherence protein B	107	02044	Secretion system [BR:ko02044],	09183	09180
D|1136176.5.peg.572	1	652766	653737	+	972	7110.5	7107	7463.5	7093	7846.5	7652	3628.5	3179	2780	4302.5	3199	2404.5	4791.23	4972.91	5267.89	5230.57	5187.76	4996.2	5494.3	4446.75	3654.63	6596.71	4528.18	3599.33	4897.2	0.104595	0.132086	0.791871	0.428436	0.476816	Type II/IV secretion system protein TadC%2C associated with Flp pilus assembly	NA	K12511	tadC; tight adherence protein C	108	02044	Secretion system [BR:ko02044],	09183	09180
D|1136176.5.peg.573	1	653734	654738	+	1005	5700	5671.5	5992.5	5574.5	6446	6030	3337.5	2873.5	2375	3549.5	2405.5	2175.5	3841.07	3968.12	4229.56	4110.42	4262.08	3937.15	5053.6	4018.72	3122.21	5442.05	3404.28	3256.47	4053.81	0.00319387	0.132836	0.0240437	0.980818	0.984354	TPR repeat protein	NA			10
D|1136176.5.peg.574	1	654775	656535	+	1761	1719	1631.5	1803	1627	1890.5	1831	1101	1020.5	890	1130.5	908	842	1158.38	1141.24	1272.68	1199.79	1249.66	1195.51	1667.37	1426.76	1170.01	1732.75	1285.27	1260.66	1313.34	-0.2426	0.0946206	-2.56393	0.0103496	0.015354	Mlr4739 protein	NA			25
D|1136176.5.peg.575	1	656532	657461	+	930	2066	1987.5	2006.5	1873	2156.5	2249	1176	1210.5	1238.5	1147	1240.5	1106.5	1392.22	1390.34	1415.97	1381.2	1425.54	1468.43	1780.95	1692.53	1627.49	1758.81	1755.22	1655.93	1562.05	-0.27652	0.0353326	-7.82621	5.03e-15	2.01e-14	RfbJ protein	NA			151
D|1136176.5.peg.576	1	657471	658190	+	720	827	783	790.5	865	828	901	368	439	379.5	369.5	431.5	354.5	557.292	547.881	557.636	637.875	547.472	588.287	557.305	614.068	498.239	565.826	610.08	530.018	567.665	0.0257468	0.0650932	0.395537	0.692447	0.733197	D01201799: hypothetical protein	NA			10
D|1136176.5.peg.577	1	658232	659374	-	1143	141	151	166	138	200	181	126	90	106	104	111	78	95.0159	105.658	117.174	101.765	132.24	118.18	190.816	125.891	139.349	159.474	157.12	116.784	129.956	-0.405671	0.121863	-3.32892	0.000872	0.0014879	Chromate transport protein ChrA	NA	K07240	chrA; chromate transporter	249	02000	Transporters [BR:ko02000],	09183	09180
D|1136176.5.peg.578	1	659476	660390	+	915	304	309	305	263	277	311	204	216	201	183	195	227	204.857	216.214	215.29	193.943	183.152	203.06	308.941	302.138	264.237	280.613	276.022	339.87	249.028	-0.540867	0.0761495	-7.1027	1.22e-12	4.16e-12	LysR-like transcriptional regulator	NA			47
D|1136176.5.peg.579	1	660634	661701	-	1068	926	929	799	717	908	863	479	466	662	419	461	480	624.005	650.04	563.989	528.735	600.368	563.476	725.405	651.835	870.275	642.496	652.545	718.668	649.32	-0.272131	0.0833171	-3.26621	0.00108996	0.00183718	Transcriptional repressor of the lac operon	NA			121
D|1136176.5.peg.580	1	661950	664052	+	2103	296	263	274	250	281	276	109	82	118	109	94	121	199.466	184.027	193.408	184.357	185.797	180.208	165.071	114.701	155.124	167.141	133.057	181.164	170.293	0.302785	0.0916706	3.30296	0.000957	0.00162375	Alpha-galactosidase (EC 3.2.1.22)	KEGG_ENZYME:3.2.1.22	K07407	E3.2.1.22B, galA, rafA; alpha-galactosidase [EC:3.2.1.22]	409	00052 00561 00600 00603	Galactose metabolism [PATH:ko00052], Glycerolipid metabolism [PATH:ko00561], Sphingolipid metabolism [PATH:ko00600], Glycosphingolipid biosynthesis - globo and isoglobo series [PATH:ko00603],	09101 09103 09107	09100
D|1136176.5.peg.581	1	664154	665848	+	1695	473	461	463	444	469	478	232	200	244	192	182	215	318.741	322.571	326.817	327.418	310.102	312.099	351.344	279.757	320.766	294.414	257.621	321.904	311.963	0.0715427	0.0690363	1.03631	0.30006	0.346746	Sodium-Choline Symporter	NA	K03307	TC.SSS; solute:Na+ symporter, SSS family	317	99977	Transport,	09193	09190
D|1136176.5.peg.582	1	665946	667286	-	1341	167	130	136	178	164	152	53	63	46	62	47	56	112.537	90.9637	95.9981	131.262	108.437	99.2449	80.264	88.1236	60.4723	95.0711	66.5285	83.8446	92.7288	0.433033	0.129481	3.34437	0.000825	0.00141264	Multidrug and toxin extrusion (MATE) family efflux pump YdhE/NorM%2C homolog	NA			231
D|1136176.5.peg.583	1	667568	668650	-	1083	4549	4527	4522	4180	4880	4905	3961	4198	4679	3594	4379	4051	3065.44	3167.64	3191.94	3082.45	3226.65	3202.61	5998.6	5872.11	6151.08	5511.06	6198.47	6065.26	4561.11	-0.9188	0.0341041	-26.941	7.26e-160	9.11e-158	Maltose/maltodextrin transport ATP-binding protein MalK (EC 3.6.3.19)	KEGG_ENZYME:3.6.3.19	K10111	malK, mtlK, thuK; multiple sugar transport system ATP-binding protein [EC:3.6.3.-]	185	02010 02000	ABC transporters [PATH:ko02010], Transporters [BR:ko02000],	09131 09183	09130 09180
D|1136176.5.peg.584	1	668947	669867	+	921	7384	7591.5	7412	6979.5	7765.5	8245	7033	7016	7912	6633.5	7385	6389	4975.87	5311.58	5231.89	5146.51	5134.2	5383.38	10650.9	9813.89	10401.2	10171.1	10453.5	9565.77	7686.65	-0.969376	0.0347261	-27.9149	1.76e-171	2.91e-169	ABC transporter%2C permease protein	NA	K02025	ABC.MS.P; multiple sugar transport system permease protein	237	02000	Transporters [BR:ko02000],	09183	09180
D|1136176.5.peg.585	1	669867	670718	+	852	4692	4594.5	4770	4444.5	4951.5	5228	2748	2964	3315	2784.5	3202	2692	3161.8	3214.52	3366.99	3277.13	3273.59	3413.5	4161.61	4146.01	4357.95	4269	4532.43	4030.53	3767.09	-0.371816	0.0358115	-10.3826	2.98e-25	1.92e-24	Multiple sugar ABC transporter%2C membrane-spanning permease protein MsmG	NA	K02026	ABC.MS.P1; multiple sugar transport system permease protein	282	02000	Transporters [BR:ko02000],	09183	09180
D|1136176.5.peg.586	1	670905	672131	+	1227	22271	21728	22076	20636	23031	24063	18314	18677	20263	16926	18704	19277	15007.8	15203.5	15582.7	15217.6	15228.1	15711.4	27735	26125.2	26638	25954.4	26475.5	28862	21145.1	-0.815142	0.0314482	-25.9202	3.95e-148	4.16e-146	N-Acetyl-D-glucosamine ABC transport system%2C sugar-binding protein	NA	K02027	ABC.MS.S; multiple sugar transport system substrate-binding protein	254	02000	Transporters [BR:ko02000],	09183	09180
D|1136176.5.peg.587	1	672303	675419	+	3117	10287	10015	9718	9601	10450	10654	8135	8543	8999	7181	8184	7669	6932.11	7007.7	6859.63	7080.04	6909.52	6956.28	12319.8	11949.8	11830.2	11011.4	11584.4	11482.2	9326.93	-0.749508	0.0290412	-25.8084	7.13e-147	7.36e-145	Beta-galactosidase (EC 3.2.1.23)	KEGG_ENZYME:3.2.1.23	K01190	lacZ; beta-galactosidase [EC:3.2.1.23]	479	00052 00600 00511	Galactose metabolism [PATH:ko00052], Sphingolipid metabolism [PATH:ko00600], Other glycan degradation [PATH:ko00511],	09101 09103 09107	09100
D|1136176.5.peg.588	1	676116	677099	-	984	777	790	794	753	874	874	562	517	590	460	620	468	523.598	552.779	560.459	555.283	577.887	570.658	851.101	723.173	775.622	705.366	877.61	700.702	664.52	-0.472247	0.0644794	-7.32399	2.41e-13	8.56e-13	Evolved beta-D-galactosidase transcriptional repressor	NA	K12113	ebgR; LacI family transcriptional regulator, ebg operon repressor	239	03000	Transcription factors [BR:ko03000],	09182	09180
D|1136176.5.peg.589	1	677493	678503	+	1011	942	871	856	802	876	898	487	465	519	488	462	383	634.787	609.457	604.223	591.417	579.21	586.328	737.52	650.436	682.285	748.301	653.961	573.437	637.614	-0.165812	0.062112	-2.66956	0.00759508	0.0114729	UDP-glucose 4-epimerase (EC 5.1.3.2)	KEGG_ENZYME:5.1.3.2	K01784	galE, GALE; UDP-glucose 4-epimerase [EC:5.1.3.2]	245	00052 00520 00541	Galactose metabolism [PATH:ko00052], Amino sugar and nucleotide sugar metabolism [PATH:ko00520], O-Antigen nucleotide sugar biosynthesis [PATH:ko00541],	09101 09107	09100
D|1136176.5.peg.590	1	678752	679807	+	1056	946	925	928	952	965	1013	308	344	332	329	292	302	637.482	647.242	655.046	702.031	638.056	661.415	466.44	481.183	436.452	504.49	413.326	452.162	557.944	0.518227	0.055122	9.40145	5.38e-21	2.95e-20	Galactose-1-phosphate uridylyltransferase (EC 2.7.7.10)	KEGG_ENZYME:2.7.7.10	K00965	galT, GALT; UDPglucose--hexose-1-phosphate uridylyltransferase [EC:2.7.7.12]	303	00052 00520 04917	Galactose metabolism [PATH:ko00052], Amino sugar and nucleotide sugar metabolism [PATH:ko00520], Prolactin signaling pathway [PATH:ko04917],	09101 09152	09100 09150
D|1136176.5.peg.591	1	679997	681157	+	1161	1317	1199	1277	1217	1291	1314	363	365	397	359	381	341	887.489	838.965	901.394	897.449	853.607	857.946	549.733	510.557	521.902	550.492	539.305	510.554	701.616	0.719008	0.0464536	15.478	4.89e-54	8.53e-53	Galactokinase (EC 2.7.1.6)	KEGG_ENZYME:2.7.1.6	K00849	galK; galactokinase [EC:2.7.1.6]	297	00052 00520 04147	Galactose metabolism [PATH:ko00052], Amino sugar and nucleotide sugar metabolism [PATH:ko00520], Exosome [BR:ko04147],	09101 09183	09100 09180
D|1136176.5.peg.592	1	681279	682358	+	1080	5131	4187	4480	5162	4791	4713	882	800	689	1074	1044	853	3457.63	2929.73	3162.29	3806.6	3167.8	3077.25	1335.71	1119.03	905.769	1646.88	1477.78	1277.13	2280.3	1.3369	0.125273	10.6719	1.38e-26	9.32e-26	Aldose 1-epimerase (EC 5.1.3.3)	KEGG_ENZYME:5.1.3.3	K01785	galM, GALM; aldose 1-epimerase [EC:5.1.3.3]	186	00010 00052	Glycolysis / Gluconeogenesis [PATH:ko00010], Galactose metabolism [PATH:ko00052],	09101	09100
D|1136176.5.peg.593	1	682492	683490	-	999	467	465	463	402	469	443	263	298	306	273	311	252	314.698	325.37	326.817	296.446	310.102	289.247	398.291	416.839	402.272	418.619	440.22	377.301	359.685	-0.398227	0.0601402	-6.62165	3.55e-11	1.11e-10	Galactose operon repressor%2C GalR-LacI family of transcriptional regulators	NA	K02529	lacI, galR; LacI family transcriptional regulator	193	03000	Transcription factors [BR:ko03000],	09182	09180
D|1136176.5.peg.594	1	683689	683880	+	192	18.5	21	23	26.5	23.5	23	10	7	8.5	5	13	4.5	12.1297	14.6941	16.235	19.1731	15.2076	15.0173	15.1442	9.79151	10.5169	7.66702	18.4015	5.9889	13.3306	0.445112	0.268882	1.65542	0.09784	0.125151	tRNA-binding protein YgjH	NA			NA
D|1136176.5.peg.595	1	683852	684010	+	159	51.5	41	62	60.5	65.5	40	53	45	42.5	36	48	36.5	34.3674	28.6885	43.7638	44.2456	42.9779	26.1171	80.264	62.9454	55.2138	55.2026	67.944	53.9001	49.6359	-0.771828	0.16318	-4.72992	2.25e-06	4.95e-06	tRNA-binding protein YgjH	NA			NA
D|1136176.5.peg.596	1	684091	684645	-	555	704	632	678	632	751	729	338	346	350	352	338	283	474.405	442.223	478.579	466.054	496.56	475.984	511.872	483.98	460.115	539.758	478.439	423.715	477.64	-0.0307059	0.0598344	-0.513181	0.607825	0.654646	D01200286: hypothetical protein	NA			37
D|1136176.5.peg.597	1	684951	686135	+	1185	987	953	932	873	965	1038	576	579	567	553	521	553	665.111	666.834	657.869	643.774	638.056	677.738	872.303	809.898	745.386	847.973	737.475	827.966	732.532	-0.291731	0.0499736	-5.83771	5.29e-09	1.44e-08	NnrS protein involved in response to NO	NA	K07234	K07234; uncharacterized protein involved in response to NO	168	99994	Others,	09193	09190
D|1136176.5.peg.598	1	686213	687223	-	1011	3954	3805	3778	3552	3994	3932	2711	2703	2837	2632	2317	2525	2664.49	2662.44	2666.77	2619.34	2640.83	2567.31	4105.58	3780.92	3729.56	4035.92	3279.71	3780.49	3211.11	-0.521335	0.05092	-10.2383	1.34e-24	8.38e-24	Adenosine deaminase (EC 3.5.4.4)	KEGG_ENZYME:3.5.4.4	K21053	ade; adenine deaminase [EC:3.5.4.2]	303	00230	Purine metabolism [PATH:ko00230],	09104	09100
D|1136176.5.peg.599	1	687579	687893	+	315	36	39	32	30	37	34	17	13	21	15	18	17	24.2594	27.2891	22.5878	22.1228	24.4643	22.1995	25.7451	18.1842	27.6069	23.0011	25.479	25.4528	24.0327	-0.026188	0.19143	-0.136802	0.891187	0.908408	Pressure-regulated ORF-like protein	NA			22
D|1136176.5.peg.600	1	688067	689113	-	1047	97	90	74	95	83	91	25	31	29	30	33	28	65.3655	62.9749	52.2342	70.0556	54.8795	59.4164	37.8604	43.3624	38.1238	46.0021	46.7115	41.9223	51.5757	0.522529	0.142553	3.66551	0.000247	0.000449	Predicted deacylase	NA	K06987	K06987; uncharacterized protein	203	99997	Function unknown,	09194	09190
D|1136176.5.peg.601	1	689385	689924	+	540	127	113	94	107	124	131	70	57	62	53	67	73	85.5817	79.0684	66.3516	78.9047	81.9886	85.5334	106.009	79.7309	81.5061	81.2704	94.8385	109.297	85.8401	-0.205799	0.113569	-1.8121	0.0699704	0.0915969	ABC-type multidrug transport system%2C ATPase and permease component	NA			24
D|1136176.5.peg.602	1	690061	691533	-	1473	786	745	745	699	813	741	776	787	786	665	797	749	529.663	521.292	525.872	515.462	537.554	483.819	1175.19	1100.85	1033.29	1019.71	1128.15	1121.42	807.689	-1.07889	0.0490675	-21.9879	3.76e-107	2.15e-105	Aminoacyl-histidine dipeptidase (Peptidase D) (EC 3.4.13.3)	KEGG_ENZYME:3.4.13.3	K01270	pepD; dipeptidase D [EC:3.4.13.-]	346	00480 01002	Glutathione metabolism [PATH:ko00480], Peptidases and inhibitors [BR:ko01002],	09106 09181	09100 09180
D|1136176.5.peg.603	1	692038	692163	-	126	73	54	66	60	68	94	92	59	81	92	77	84	49.1926	37.7849	46.5873	44.2456	44.9615	61.3751	139.326	82.5285	106.484	141.073	108.993	125.767	82.3599	-1.30252	0.146474	-8.89252	5.97e-19	2.95e-18	hypothetical protein	NA			1
D|1136176.5.peg.604	1	692611	693900	+	1290	186	169	157	151	181	181	43	53	66	51	57	48	125.34	118.253	110.821	111.352	119.677	118.18	65.1199	74.1357	86.7645	78.2036	80.6835	71.8668	96.6997	0.620177	0.105268	5.89141	3.83e-09	1.05e-08	Xanthine/uracil/thiamine/ascorbate permease family protein	NA	K06901	pbuG, azgA, ghxP, ghxQ, adeQ; adenine/guanine/hypoxanthine permease	316	02000	Transporters [BR:ko02000],	09183	09180
D|1136176.5.peg.605	1	693985	694449	+	465	262	260.5	268	215.5	281	279	137	157	167	157	144	142.5	176.554	181.927	189.173	158.547	185.797	182.167	207.475	219.61	219.541	240.745	203.832	212.606	198.164	-0.277819	0.0753959	-3.6848	0.000229	0.000417	Xanthine-guanine phosphoribosyltransferase (EC 2.4.2.22)	KEGG_ENZYME:2.4.2.22	K00769	gpt; xanthine phosphoribosyltransferase [EC:2.4.2.22]	112	00230	Purine metabolism [PATH:ko00230],	09104	09100
D|1136176.5.peg.606	1	694473	695792	+	1320	2158	2056.5	2178	2060.5	2280	2287	791	867	911	726	844	882.5	1454.21	1438.63	1537.38	1519.1	1507.53	1493.24	1197.9	1212.75	1197.61	1113.25	1194.68	1320.55	1348.9	0.306396	0.041686	7.35009	1.98e-13	7.07e-13	Fermentation/respiration switch protein	NA	K11750	frsA; esterase FrsA [EC:3.1.-.-]	181	99980	Enzymes with EC numbers,	09191	09190
D|1136176.5.peg.607	1	695937	696326	+	390	12036	9089	9322	10465	9818	9793	2738	1678	1159	3081	967	1450	8110.72	6359.76	6580.1	7717.18	6491.64	6394.11	4146.47	2347.17	1523.64	4724.42	1368.79	2170.98	4827.91	1.35531	0.31	4.37198	1.23e-05	2.54e-05	Curlin genes transcriptional activator	NA	K11926	crl; sigma factor-binding protein Crl	61	03000	Transcription factors [BR:ko03000],	09182	09180
D|1136176.5.peg.608	1	696448	697587	+	1140	629	558	472	496	533	564	230	192	183	199	173	190	423.865	390.444	333.17	365.764	352.419	368.251	348.315	268.567	240.574	305.147	244.881	284.473	327.156	0.403954	0.0940602	4.29463	1.75e-05	3.56e-05	Glutamate 5-kinase (EC 2.7.2.11) / RNA-binding C-terminal domain PUA	KEGG_ENZYME:2.7.2.11	K00931	proB; glutamate 5-kinase [EC:2.7.2.11]	290	00330 00332	Arginine and proline metabolism [PATH:ko00330], Carbapenem biosynthesis [PATH:ko00332],	09105 09110	09100
D|1136176.5.peg.609	1	697680	698930	+	1251	688	586	580	547	606	589	185	175	199	166	178	189	463.623	410.036	409.404	403.373	400.686	384.574	280.167	244.788	261.608	254.545	251.959	282.976	337.312	0.650286	0.0696105	9.34178	9.47e-21	5.16e-20	Gamma-glutamyl phosphate reductase (EC 1.2.1.41)	KEGG_ENZYME:1.2.1.41	K00147	proA; glutamate-5-semialdehyde dehydrogenase [EC:1.2.1.41]	362	00330 00332	Arginine and proline metabolism [PATH:ko00330], Carbapenem biosynthesis [PATH:ko00332],	09105 09110	09100
D|1136176.5.peg.610	1	699087	699536	+	450	190	191	180	187	186.5	199	82.5	103	105.5	88.5	103	91.5	128.036	133.647	127.056	137.899	122.983	129.932	124.182	144.075	138.035	134.94	145.796	136.248	133.569	-0.0814927	0.0861334	-0.946122	0.344087	0.392252	Ribonucleotide reductase transcriptional regulator NrdR	NA	K07738	nrdR; transcriptional repressor NrdR	133	03000	Transcription factors [BR:ko03000],	09182	09180
D|1136176.5.peg.611	1	699547	700665	+	1119	488	441	465	454	475.5	495	146.5	116	143.5	110.5	126	157.5	328.849	308.577	328.229	334.792	314.069	323.199	221.105	162.259	187.99	168.674	178.353	235.064	257.597	0.750626	0.0808262	9.28692	1.59e-20	8.56e-20	Diaminohydroxyphosphoribosylaminopyrimidine deaminase (EC 3.5.4.26) / 5-amino-6-(5-phosphoribosylamino)uracil reductase (EC 1.1.1.193)	KEGG_ENZYME:3.5.4.26,KEGG_ENZYME:1.1.1.193	K11752	ribD; diaminohydroxyphosphoribosylaminopyrimidine deaminase / 5-amino-6-(5-phosphoribosylamino)uracil reductase [EC:3.5.4.26 1.1.1.193]	208	00740 02024	Riboflavin metabolism [PATH:ko00740], Quorum sensing [PATH:ko02024],	09108 09145	09100 09140
D|1136176.5.peg.612	1	700712	701368	+	657	2034	1892	1900	1783	1980	2041	906	936	1071	960	954	943	1370.65	1323.87	1341.15	1314.83	1309.17	1332.62	1372.06	1309.27	1407.95	1472.07	1350.39	1411.88	1359.66	-0.0579799	0.0358503	-1.61728	0.105818	0.134578	Riboflavin synthase eubacterial/eukaryotic (EC 2.5.1.9)	KEGG_ENZYME:2.5.1.9	K00793	ribE, RIB5; riboflavin synthase [EC:2.5.1.9]	149	00740	Riboflavin metabolism [PATH:ko00740],	09108	09100
D|1136176.5.peg.613	1	701477	702586	+	1110	4864	4533	4651	4371	4795	4849	1680	1919	1977	2010	1892	1870	3277.71	3171.83	3282.99	3223.3	3170.45	3166.04	2544.22	2684.27	2598.99	3082.14	2678.13	2799.81	2973.32	0.235838	0.045436	5.19056	2.1e-07	5.07e-07	3%2C4-dihydroxy-2-butanone 4-phosphate synthase (EC 4.1.99.12) / GTP cyclohydrolase II (EC 3.5.4.25)	KEGG_ENZYME:4.1.99.12,KEGG_ENZYME:3.5.4.25	K14652	ribBA; 3,4-dihydroxy 2-butanone 4-phosphate synthase / GTP cyclohydrolase II [EC:4.1.99.12 3.5.4.25]	399	00740 00790	Riboflavin metabolism [PATH:ko00740], Folate biosynthesis [PATH:ko00790],	09108	09100
D|1136176.5.peg.614	1	702881	703351	+	471	1921	1797.5	1753.5	1650.5	1828	1933	794	822	923.5	774.5	827.5	737	1294.51	1257.4	1237.39	1216.76	1208.67	1262.11	1202.45	1149.8	1213.39	1186.86	1170.62	1103.46	1208.62	0.0894084	0.0375567	2.38063	0.0172833	0.0249313	6%2C7-dimethyl-8-ribityllumazine synthase (EC 2.5.1.78)	KEGG_ENZYME:2.5.1.78	K00794	ribH, RIB4; 6,7-dimethyl-8-ribityllumazine synthase [EC:2.5.1.78]	183	00740	Riboflavin metabolism [PATH:ko00740],	09108	09100
D|1136176.5.peg.615	1	703351	703818	+	468	855	761.5	786.5	792.5	831	823	320	238	427.5	320.5	404.5	332	576.16	532.487	554.812	584.043	549.456	537.359	484.613	332.911	561.34	490.689	571.862	497.079	522.734	0.181953	0.104075	1.74828	0.0804151	0.104096	Transcription termination protein NusB	NA	K03625	nusB; transcription antitermination protein NusB	124	03021 03009	Transcription machinery [BR:ko03021], Ribosome biogenesis [BR:ko03009],	09182	09180
D|1136176.5.peg.616	1	704110	705084	+	975	899	880	893	817.5	915.5	950.5	375	369.5	445	348.5	355.5	305.5	605.81	615.754	630.34	602.478	604.996	620.281	567.906	516.153	585.003	533.625	502.502	456.654	570.125	0.217702	0.0561424	3.87768	0.000105	0.000198	Thiamine-monophosphate kinase (EC 2.7.4.16)	KEGG_ENZYME:2.7.4.16	K00946	thiL; thiamine-monophosphate kinase [EC:2.7.4.16]	241	00730	Thiamine metabolism [PATH:ko00730],	09108	09100
D|1136176.5.peg.617	1	705084	705590	+	507	222	225	221	183.5	210.5	226.5	100	96.5	112	101.5	91.5	77.5	149.599	157.437	155.997	134.949	138.852	147.562	151.442	134.284	147.237	154.874	128.81	115.286	143.027	0.0886865	0.08971	0.988591	0.322863	0.370423	Phosphatidylglycerophosphatase A (EC 3.1.3.27)	KEGG_ENZYME:3.1.3.27	K01095	pgpA; phosphatidylglycerophosphatase A [EC:3.1.3.27]	120	00564	Glycerophospholipid metabolism [PATH:ko00564],	09103	09100
D|1136176.5.peg.618	1	705641	706000	+	360	134	143	112	123	146	126	74	80	73	65	55	71	90.2988	100.06	79.0572	90.7036	96.5349	82.2688	112.067	111.903	95.9668	99.6713	77.8525	106.303	95.2239	-0.161955	0.108783	-1.48879	0.136543	0.170431	Antibiotic biosynthesis monooxygenase	NA			104
D|1136176.5.peg.619	1	706147	708030	-	1884	3059	2991.5	3091	2872	3198.5	3187.5	1247.5	1248	1436	1342	1281.5	1211	2061.37	2092.86	2181.84	2117.89	2114.51	2080.88	1888.48	1745.69	1887.79	2057.83	1813.25	1813.14	1987.96	0.175222	0.0402982	4.34815	1.37e-05	2.82e-05	1-deoxy-D-xylulose 5-phosphate synthase (EC 2.2.1.7)	KEGG_ENZYME:2.2.1.7	K01662	dxs; 1-deoxy-D-xylulose-5-phosphate synthase [EC:2.2.1.7]	505	00730 00900	Thiamine metabolism [PATH:ko00730], Terpenoid backbone biosynthesis [PATH:ko00900],	09108 09109	09100
D|1136176.5.peg.620	1	708052	708936	-	885	1829	1754.5	1686	1765	1902.5	1992.5	740.5	691	870	795	762.5	727	1232.51	1227.31	1190.09	1301.56	1257.6	1300.63	1120.67	966.562	1143.71	1219.06	1078.61	1088.48	1177.23	0.183122	0.0531783	3.44354	0.000574	0.00100008	Octaprenyl diphosphate synthase (EC 2.5.1.90) / Dimethylallyltransferase (EC 2.5.1.1) / (2E%2C6E)-farnesyl diphosphate synthase (EC 2.5.1.10) / Geranylgeranyl pyrophosphate synthetase (EC 2.5.1.29)	KEGG_ENZYME:2.5.1.90,KEGG_ENZYME:2.5.1.1,KEGG_ENZYME:2.5.1.10,KEGG_ENZYME:2.5.1.29	K00795	ispA; farnesyl diphosphate synthase [EC:2.5.1.1 2.5.1.10]	188	00900 01006	Terpenoid backbone biosynthesis [PATH:ko00900], Prenyltransferases [BR:ko01006],	09109 09181	09100 09180
D|1136176.5.peg.621	1	708957	709199	-	243	37	48	44	43	53	51	25	31	34	22	20	28	24.9332	33.5866	31.0582	31.7094	35.0435	33.2993	37.8604	43.3624	44.6969	33.7349	28.31	41.9223	34.9598	-0.281175	0.162813	-1.72698	0.0841708	0.108684	Exodeoxyribonuclease VII small subunit (EC 3.1.11.6)	KEGG_ENZYME:3.1.11.6	K03602	xseB; exodeoxyribonuclease VII small subunit [EC:3.1.11.6]	53	03430 03400	Mismatch repair [PATH:ko03430], DNA repair and recombination proteins [BR:ko03400],	09124 09182	09120 09180
D|1136176.5.peg.622	1	709498	710262	+	765	1435.5	1376.5	1250	1170.5	1289.5	1323.5	481	439	502	475	478.5	403.5	967.005	962.816	882.335	862.79	852.285	863.822	728.434	614.068	659.936	728.367	676.609	603.382	783.487	0.427461	0.0626006	6.82838	8.59e-12	2.77e-11	Flagellar motor rotation protein MotA	NA	K02556	motA; chemotaxis protein MotA	266	02020 02030 02040 02000 02035	Two-component system [PATH:ko02020], Bacterial chemotaxis [PATH:ko02030], Flagellar assembly [PATH:ko02040], Transporters [BR:ko02000], Bacterial motility proteins [BR:ko02035],	09132 09142 09183	09130 09140 09180
D|1136176.5.peg.623	1	710275	711222	+	948	962.5	902.5	797	818.5	901.5	975.5	355	346	340	319	291.5	311.5	648.264	631.148	562.577	603.216	595.74	636.604	537.617	483.98	446.969	489.156	411.91	465.637	542.735	0.377073	0.0650426	5.79733	6.74e-09	1.82e-08	Flagellar motor rotation protein MotB	NA	K02557	motB; chemotaxis protein MotB	204	02030 02040 02000 02035	Bacterial chemotaxis [PATH:ko02030], Flagellar assembly [PATH:ko02040], Transporters [BR:ko02000], Bacterial motility proteins [BR:ko02035],	09142 09183	09140 09180
D|1136176.5.peg.624	1	711541	712989	+	1449	3345	3262	3162	2985	3480	3449	1635	1623	1908	1751	1724	1616	2254.1	2282.49	2231.96	2201.22	2300.97	2251.95	2476.07	2270.23	2508.28	2684.99	2440.32	2419.52	2360.17	-0.129697	0.0386788	-3.35319	0.000799	0.00137095	tRNA S(4)U 4-thiouridine synthase (former ThiI) / Rhodanese-like domain required for thiamine synthesis	NA	K03151	thiI; tRNA uracil 4-sulfurtransferase [EC:2.8.1.4]	354	00730 04122 03016	Thiamine metabolism [PATH:ko00730], Sulfur relay system [PATH:ko04122], Transfer RNA biogenesis [BR:ko03016],	09108 09123 09182	09100 09120 09180
D|1136176.5.peg.625	1	713651	714559	+	909	386.5	418	397.5	381.5	411	444	187.5	169.5	194.5	152	204.5	180	260.114	292.483	280.23	280.96	271.752	289.9	283.196	236.395	255.035	233.077	288.762	269.501	270.117	0.0975835	0.0698178	1.39769	0.162206	0.198828	Glycine cleavage system transcriptional activator GcvA	NA	K03566	gcvA; LysR family transcriptional regulator, glycine cleavage system transcriptional activator	241	02026 03000	Biofilm formation - Escherichia coli [PATH:ko02026], Transcription factors [BR:ko03000],	09145 09182	09140 09180
D|1136176.5.peg.626	1	714552	715175	+	624	350	310.5	324.5	308.5	309.5	343	110.5	114	131.5	102	132	116	235.855	216.913	228.701	227.128	204.31	223.954	166.586	159.462	172.214	156.407	186.846	173.678	196.005	0.395541	0.0771339	5.12798	2.93e-07	7.01e-07	Predicted hydrolase of the alpha/beta-hydrolase fold	NA	K07020	K07020; uncharacterized protein	110	99997	Function unknown,	09194	09190
D|1136176.5.peg.627	1	715165	715563	+	399	184	174.5	172.5	179.5	183.5	207	42	57	72	59	60	54	123.992	121.751	121.409	132	120.999	135.156	63.6054	79.7309	94.6522	90.4709	84.93	80.8502	104.129	0.608045	0.103409	5.88001	4.1e-09	1.12e-08	COG2363	NA			44
D|1136176.5.peg.628	1	715560	716651	+	1092	670.5	705	708.5	612.5	704	775	204	214.5	264	208	264.5	239	451.494	493.303	499.755	451.306	465.484	506.018	308.941	299.341	347.058	318.948	373.692	357.837	406.098	0.514899	0.0667717	7.71133	1.25e-14	4.81e-14	LSU rRNA 2'-O-methyl-C2498 methyltransferase RlmM	NA	K06968	rlmM; 23S rRNA (cytidine2498-2'-O)-methyltransferase [EC:2.1.1.186]	269	03009	Ribosome biogenesis [BR:ko03009],	09182	09180
D|1136176.5.peg.629	1	716733	717506	-	774	80	82	83	68	91	86	141	114	143	127	105	112	53.9097	57.3771	58.5871	50.1451	60.169	56.1517	213.533	159.462	187.99	194.742	148.627	167.689	117.365	-1.66928	0.108568	-15.3754	2.39e-53	4.07e-52	DNA polymerase I (EC 2.7.7.7)	KEGG_ENZYME:2.7.7.7	K01146	xni; protein Xni	155	99976	Replication and repair,	09192	09190
D|1136176.5.peg.630	1	717652	719016	-	1365	8418	7639	7402	7180	7973	7912	14324	15035	13943	12984	12662	12748	5672.65	5345.17	5224.84	5294.73	5271.73	5165.96	21692.5	21030.8	18329.7	19909.7	17923.1	19086.6	12495.6	-1.88338	0.0529094	-35.5963	1.6e-277	7.41e-275	Decarboxylase family protein	NA	K06966	ppnN; pyrimidine/purine-5'-nucleotide nucleosidase [EC:3.2.2.10 3.2.2.-]	349	00230 00240	Purine metabolism [PATH:ko00230], Pyrimidine metabolism [PATH:ko00240],	09104	09100
D|1136176.5.peg.631	1	719329	720894	-	1566	1719	1609	1676	1615	1775	1759	941	1164	1225	1045	1137	1036	1158.38	1125.85	1183.04	1190.95	1173.63	1148.5	1425.06	1628.19	1610.4	1602.41	1609.42	1551.13	1367.25	-0.434283	0.039353	-11.0356	2.57e-28	1.86e-27	GGDEF domain family protein	NA	K13590	dgcB; diguanylate cyclase [EC:2.7.7.65]	111	04112	Cell cycle - Caulobacter [PATH:ko04112],	09143	09140
D|1136176.5.peg.632	1	721013	723271	-	2259	504	487	487	487	490	487	222	237	230	190	258	199	339.631	340.764	343.758	359.127	323.987	317.975	336.2	331.513	302.361	291.347	365.199	297.948	329.151	0.0720574	0.0665702	1.08243	0.279063	0.324258	D01199812: hypothetical protein	NA			147
D|1136176.5.peg.633	1	723330	724175	-	846	218	187	201	177	207	210	183	158	161	125	148	124	146.904	130.848	141.879	130.525	136.868	137.115	277.138	221.008	211.653	191.676	209.494	185.656	176.73	-0.652906	0.0925059	-7.05799	1.69e-12	5.68e-12	NADPH dependent preQ0 reductase (EC 1.7.1.13)	KEGG_ENZYME:1.7.1.13	K06879	queF; 7-cyano-7-deazaguanine reductase [EC:1.7.1.13]	196	00790 03016	Folate biosynthesis [PATH:ko00790], Transfer RNA biogenesis [BR:ko03016],	09108 09182	09100 09180
D|1136176.5.peg.634	1	724307	724852	+	546	319	288	305	287.5	346	317.5	173	209	176.5	141	189	153.5	214.965	201.52	215.29	211.642	228.775	206.978	261.994	292.347	231.372	216.21	267.529	229.076	231.475	-0.229245	0.0780235	-2.93815	0.00330179	0.00519909	Syd protein	NA	K15723	syd; SecY interacting protein Syd	124	99993	Cell motility,	09193	09190
D|1136176.5.peg.635	1	724857	725633	+	777	142	123	149	143.5	152	154.5	118	116	93.5	79	96	107.5	95.6897	86.0656	105.174	105.452	100.502	100.551	178.701	162.259	122.259	121.139	135.888	160.203	122.824	-0.567235	0.106376	-5.33237	9.69e-08	2.4e-07	Zn-ribbon-containing%2C possibly nucleic-acid-binding protein	NA			172
D|1136176.5.peg.636	1	726043	727248	+	1206	94	75	100	93	95	99	37	41	26	33	41	29	63.3439	52.479	70.5868	68.5807	62.8138	64.6398	56.0334	57.3503	34.18	50.6023	58.0355	43.4195	56.8388	0.355987	0.139274	2.55602	0.0105878	0.0156824	Maltoporin (maltose/maltodextrin high-affinity receptor%2C phage lambda receptor protein)	NA	K02024	lamB; maltoporin	169	02000	Transporters [BR:ko02000],	09183	09180
D|1136176.5.peg.637	1	727339	728148	-	810	7775	7569	7330	6747	7883	7862	2515	2757	2946	2492	2590	2602	5239.35	5296.19	5174.01	4975.42	5212.23	5133.31	3808.75	3856.46	3872.85	3821.24	3666.14	3895.78	4495.98	0.437079	0.0262456	16.6534	2.86e-62	6e-61	Methionine ABC transporter substrate-binding protein	NA	K02073	metQ; D-methionine transport system substrate-binding protein	195	02010 02000	ABC transporters [PATH:ko02010], Transporters [BR:ko02000],	09131 09183	09130 09180
D|1136176.5.peg.638	1	728215	728898	-	684	1217	1108.5	1126.5	1156	1171	1159.5	161.5	152	151.5	150	171	160	820.101	775.29	794.808	852.466	774.263	756.742	243.821	212.616	198.507	230.011	242.05	239.556	511.686	1.80731	0.066014	27.3777	5.05e-165	7.57e-163	Methionine ABC transporter permease protein	NA	K02072	metI; D-methionine transport system permease protein	182	02010 02000	ABC transporters [PATH:ko02010], Transporters [BR:ko02000],	09131 09183	09130 09180
D|1136176.5.peg.639	1	728888	729922	-	1035	1021	957.5	968.5	947	1047	1020.5	369.5	473	383.5	417	389	356	688.023	669.633	683.28	698.344	692.275	665.986	558.819	661.626	503.497	639.43	550.629	533.012	628.713	0.250264	0.0641024	3.90414	9.46e-05	0.000179	Methionine ABC transporter ATP-binding protein	NA	K02071	metN; D-methionine transport system ATP-binding protein	253	02010 02000	ABC transporters [PATH:ko02010], Transporters [BR:ko02000],	09131 09183	09130 09180
D|1136176.5.peg.640	1	730130	730714	+	585	2772	2623	2618	2635	2910	2885	1140	1163	1285	1261	1278	1252	1867.97	1835.37	1847.96	1943.12	1924.09	1883.69	1726.43	1626.79	1689.28	1933.62	1809.01	1874.53	1830.16	0.0852184	0.0450857	1.89014	0.0587391	0.0777271	D-glycero-D-manno-heptose 1%2C7-bisphosphate phosphatase (EC 3.1.1.-)	KEGG_ENZYME:3.1.1.-	K03273	gmhB; D-glycero-D-manno-heptose 1,7-bisphosphate phosphatase [EC:3.1.3.82 3.1.3.83]	123	00540 01005	Lipopolysaccharide biosynthesis [PATH:ko00540], Lipopolysaccharide biosynthesis proteins [BR:ko01005],	09107 09181	09100 09180
D|1136176.5.peg.641	1	730795	731115	+	321	1788	1717	1731	1660	1925	1857	941	998	1111	998	1013	966	1204.88	1201.42	1221.86	1224.13	1272.81	1212.49	1425.06	1395.99	1460.54	1530.34	1433.9	1446.32	1335.81	-0.243929	0.0348996	-6.98943	2.76e-12	9.13e-12	D01200786: hypothetical protein	NA			13
D|1136176.5.peg.642	1	731207	732151	+	945	807	794	783	725	828	818	471	474	566	459	486	505	543.814	555.578	552.695	534.635	547.472	534.094	713.29	663.025	744.072	703.833	687.933	756.099	628.045	-0.385107	0.0461094	-8.35202	6.71e-17	2.98e-16	Trehalose operon transcriptional repressor	NA	K03485	treR; LacI family transcriptional regulator, trehalose operon repressor	171	03000	Transcription factors [BR:ko03000],	09182	09180
D|1136176.5.peg.643	1	732335	733780	+	1446	2194	2061	2115	2047	2226	2211	1187	1142	1246	1365	1083	1033	1478.47	1442.12	1492.91	1509.51	1471.83	1443.62	1797.61	1597.42	1638.01	2093.1	1532.99	1546.63	1587.02	-0.207012	0.0728169	-2.84291	0.00447033	0.00692632	PTS system%2C trehalose-specific IIB component (EC 2.7.1.69) / PTS system%2C trehalose-specific IIC component (EC 2.7.1.69)	KEGG_ENZYME:2.7.1.69,KEGG_ENZYME:2.7.1.69	K02819	treB, treP; trehalose PTS system EIIBC or EIIBCA component [EC:2.7.1.201]	359	00500 02060 02000	Starch and sucrose metabolism [PATH:ko00500], Phosphotransferase system (PTS) [PATH:ko02060], Transporters [BR:ko02000],	09101 09131 09183	09100 09130 09180
D|1136176.5.peg.644	1	733901	735586	+	1686	1246	1160	1145	1131	1255	1286	636	635	629	663	544	527	839.644	811.676	808.219	834.03	829.804	839.664	963.168	888.23	826.892	1016.65	770.032	789.038	851.42	-0.0810949	0.0667719	-1.21451	0.224554	0.266798	Trehalose-6-phosphate hydrolase (EC 3.2.1.93)	KEGG_ENZYME:3.2.1.93	K01226	treC; trehalose-6-phosphate hydrolase [EC:3.2.1.93]	390	00500	Starch and sucrose metabolism [PATH:ko00500],	09101	09100
D|1136176.5.peg.645	1	735769	736371	-	603	138	135	117	127	117	113	66	73	61	62	65	42	92.9942	94.4623	82.5866	93.6533	77.3602	73.7808	99.9514	102.111	80.1915	95.0711	92.0075	62.8835	87.2545	-0.0492731	0.12074	-0.408091	0.683207	0.724858	D01201121: hypothetical protein	NA			132
D|1136176.5.peg.646	1	736719	737969	+	1251	690	683	689	609	672	717	428	469	547	375	488	445	464.971	477.909	486.343	449.093	444.325	468.149	648.17	656.031	719.094	575.027	690.764	666.265	562.178	-0.505038	0.0563845	-8.95704	3.34e-19	1.67e-18	Serine hydroxymethyltransferase (EC 2.1.2.1)	KEGG_ENZYME:2.1.2.1	K00600	glyA, SHMT; glycine hydroxymethyltransferase [EC:2.1.2.1]	364	00630 00680 00260 00460 00670 01523	Glyoxylate and dicarboxylate metabolism [PATH:ko00630], Methane metabolism [PATH:ko00680], Glycine, serine and threonine metabolism [PATH:ko00260], Cyanoamino acid metabolism [PATH:ko00460], One carbon pool by folate [PATH:ko00670], Antifolate resistance [PATH:ko01523],	09101 09102 09105 09106 09108 09176	09100 09160
D|1136176.5.peg.647	1	738200	738526	-	327	957	856	818	735	864	991	445	442	516	493	505	511	644.895	598.961	577.4	542.009	571.275	647.051	673.915	618.264	678.341	755.968	714.827	765.082	648.999	-0.230571	0.0674549	-3.41814	0.000631	0.00109413	D01201555: hypothetical protein	NA			10
D|1136176.5.peg.648	1	738776	738967	-	192	308	289.5	291	249	340.5	352	250	223.5	283	218.5	279	240	207.552	202.219	205.408	183.619	224.807	229.83	378.604	311.93	372.036	334.282	394.924	359.334	283.712	-0.777814	0.0774727	-10.0398	1.02e-23	6.16e-23	D01200459: hypothetical protein	NA			31
D|1136176.5.peg.649	1	738969	739172	-	204	293	278.5	262	286	302.5	307	150	130.5	126	134.5	136	141	197.444	194.522	184.937	210.904	199.682	200.449	227.162	181.842	165.641	205.476	192.508	211.109	197.64	0.00977771	0.0796153	0.122812	0.902256	0.918402	D00921706: hypothetical protein	NA			52
D|1136176.5.peg.650	1	739359	740054	-	696	275	242	247	229	259	258	105	96	110	131	97	97	185.315	169.332	174.349	168.871	171.25	168.455	159.014	134.284	144.608	200.876	137.303	145.231	163.241	0.176259	0.0904386	1.94893	0.0513033	0.0685916	D01199549: hypothetical protein	NA			43
D|1136176.5.peg.651	1	740240	741958	-	1719	2048	1993	1954	1894	2005	2090	1016	956	1125	1015	947	982	1380.09	1394.54	1379.27	1396.69	1325.7	1364.62	1538.65	1337.24	1478.94	1556.41	1340.48	1470.28	1413.57	-0.0812445	0.0451106	-1.80101	0.0717021	0.0937052	Prolyl-tRNA synthetase (EC 6.1.1.15)%2C bacterial type	KEGG_ENZYME:6.1.1.15	K01881	PARS, proS; prolyl-tRNA synthetase [EC:6.1.1.15]	466	00970 01007 03016	Aminoacyl-tRNA biosynthesis [PATH:ko00970], Amino acid related enzymes [BR:ko01007], Transfer RNA biogenesis [BR:ko03016],	09122 09181 09182	09120 09180
D|1136176.5.peg.652	1	742060	742755	-	696	84	60	68	55	58	66	41	30	30	23	37	26	56.6052	41.9832	47.999	40.5585	38.3495	43.0932	62.091	41.9636	39.4384	35.2683	52.3735	38.9279	44.8876	-0.00553526	0.158557	-0.0349103	0.972151	0.977415	COG1720: Uncharacterized conserved protein	NA	K22900	TRMO, trmO; tRNA (adenine37-N6)-methyltransferase [EC:2.1.1.-]	187	03016	Transfer RNA biogenesis [BR:ko03016],	09182	09180
D|1136176.5.peg.653	1	742880	743140	+	261	42	48.5	40.5	44.5	46	53	22	18	20.5	2	32	22.5	28.3026	33.5866	28.2347	32.4468	30.4151	34.6051	33.3171	25.1782	26.2923	3.06681	45.296	32.939	29.4734	0.170824	0.253099	0.674928	0.499722	0.548394	LSU ribosomal protein L31p	NA	K02909	RP-L31, rpmE; large subunit ribosomal protein L31	76	03010 03011	Ribosome [PATH:ko03010], Ribosome [BR:ko03011],	09122 09182	09120 09180
D|1136176.5.peg.654	1	743140	743265	+	126	57	37.5	43.5	48.5	52	69	26	32	17.5	18	26	25.5	38.4107	25.8897	30.3523	35.3965	34.3823	45.052	39.3748	44.7612	22.3484	27.6013	36.803	37.4306	34.8169	0.0144481	0.183538	0.0787196	0.937256	0.948701	LSU ribosomal protein L36p	NA	K02919	RP-L36, MRPL36, rpmJ; large subunit ribosomal protein L36	44	03010 03011	Ribosome [PATH:ko03010], Ribosome [BR:ko03011],	09122 09182	09120 09180
D|1136176.5.peg.655	1	743654	745240	+	1587	194	172	174	183	179	199	80	104	108	79	94	131	130.731	120.352	122.821	134.949	118.354	129.932	121.153	145.474	141.978	121.139	133.057	196.137	134.673	-0.182519	0.106263	-1.71762	0.0858667	0.110813	Multidrug efflux pump component MtrF	NA	K12942	abgT; aminobenzoyl-glutamate transport protein	394	99987	Cofactor metabolism,	09191	09190
D|1136176.5.peg.656	1	745346	746101	-	756	125	146	157	134	169	184	46	71	88	73	79	47	84.2339	102.159	110.821	98.8153	111.743	120.139	69.6631	99.3139	115.686	111.939	111.824	70.3696	100.559	0.113975	0.136742	0.833501	0.404562	0.45318	Outer membrane protein V	NA	K07274	mipA, ompV; MipA family protein	13	02000	Transporters [BR:ko02000],	09183	09180
D|1136176.5.peg.657	1	746220	746663	-	444	206	200	200	213	205	213	121	141	146	115	121	96	138.817	139.944	141.174	157.072	135.546	139.073	183.244	197.229	191.934	176.342	171.275	143.734	159.615	-0.324873	0.0851952	-3.81328	0.000137	0.000256	D01200142: hypothetical protein	NA	K09768	K09768; uncharacterized protein	103	99997	Function unknown,	09194	09190
D|1136176.5.peg.658	1	746721	747005	-	285	297	263	279	249	327	274	161	144	148	127	166	139	200.14	184.027	196.937	183.619	216.212	178.902	243.821	201.425	194.563	194.742	234.973	208.114	203.123	-0.137751	0.082654	-1.6666	0.0955933	0.122412	D01199743: hypothetical protein	NA			10
D|1136176.5.peg.659	1	747776	748294	+	519	677.5	590	733.5	639	805	765	743	859.5	903	503	1051	691	456.211	412.835	517.401	471.216	532.265	499.489	1125.21	1201.56	1187.1	771.302	1487.69	1034.58	808.072	-1.23669	0.128379	-9.63316	5.79e-22	3.3e-21	N-acetylglutamate synthase (EC 2.3.1.1)	KEGG_ENZYME:2.3.1.1	K03790	rimJ; [ribosomal protein S5]-alanine N-acetyltransferase [EC:2.3.1.267]	10	03009	Ribosome biogenesis [BR:ko03009],	09182	09180
D|1136176.5.peg.660	1	748260	748568	-	309	204.5	195	249.5	203	264	286	241	266.5	296	169	355	206	137.47	136.446	175.761	149.698	174.556	186.737	364.974	372.077	389.126	259.145	502.502	308.428	263.077	-1.19366	0.143807	-8.30043	1.04e-16	4.53e-16	D01200233: hypothetical protein	NA			27
D|1136176.5.peg.661	1	748653	749696	-	1044	917	900	848	774	955	923	303	348	406	357	372	340	617.94	629.749	598.576	570.769	631.444	602.652	458.868	486.778	533.733	547.425	526.566	509.057	559.463	0.253572	0.0538397	4.70976	2.48e-06	5.44e-06	D01199667: hypothetical protein	NA			154
D|1136176.5.peg.662	1	749784	750098	+	315	138.5	125	138.5	148.5	147.5	145.5	31.5	49	41	43	50	44	92.9942	87.4651	97.4098	109.139	97.1961	94.6744	46.9469	68.5406	53.8992	65.9364	70.775	65.8779	79.2379	0.636982	0.119244	5.34183	9.2e-08	2.28e-07	Hypothetical protein YqcC (clustered with tRNA pseudouridine synthase C)	NA			42
D|1136176.5.peg.663	1	750098	750847	+	750	173.5	165	160.5	161.5	162.5	159.5	63.5	83	84	44	83	63	116.58	115.454	112.939	118.726	107.114	103.815	95.4082	116.099	110.428	67.4698	117.486	94.3252	106.32	0.158217	0.108207	1.46217	0.143694	0.178589	tRNA pseudouridine synthase C (EC 4.2.1.70)	KEGG_ENZYME:4.2.1.70	K06175	truC; tRNA pseudouridine65 synthase [EC:5.4.99.26]	157	03016	Transfer RNA biogenesis [BR:ko03016],	09182	09180
D|1136176.5.peg.664	1	750969	751352	-	384	2957	2860	3132	2882	3263	3291	770	993	1078	947	1183	918	1992.64	2001.2	2210.78	2125.27	2157.49	2148.78	1166.1	1389	1417.15	1452.13	1674.54	1374.45	1759.13	0.576199	0.0722854	7.97116	1.57e-15	6.45e-15	UPF0325 protein YaeH	NA			80
D|1136176.5.peg.665	1	751535	754156	-	2622	948	924	979	876	994	990	817	856	820	620	774	739	638.83	646.542	691.045	645.986	657.231	646.398	1237.28	1197.36	1077.98	950.711	1095.6	1106.45	882.618	-0.763849	0.0603753	-12.6517	1.1e-36	1.09e-35	[Protein-PII] uridylyltransferase (EC 2.7.7.59)	KEGG_ENZYME:2.7.7.59	K00990	glnD; [protein-PII] uridylyltransferase [EC:2.7.7.59]	548	02020	Two-component system [PATH:ko02020],	09132	09130
D|1136176.5.peg.666	1	754294	755172	-	879	1107	1101	1075	1032	1163	1187	634	645	726	676	657	675	745.976	770.392	758.808	761.025	768.974	775.024	960.139	902.218	954.41	1036.58	929.983	1010.63	864.513	-0.337847	0.0423924	-7.96953	1.59e-15	6.53e-15	Methionine aminopeptidase (EC 3.4.11.18)	KEGG_ENZYME:3.4.11.18	K01265	map; methionyl aminopeptidase [EC:3.4.11.18]	242	01002	Peptidases and inhibitors [BR:ko01002],	09181	09180
D|1136176.5.peg.667	1	755630	756361	+	732	4215	4466	3859	3495	4007	4207	1105	1459	1719	1063	1651	1718	2840.37	3124.95	2723.95	2577.31	2649.42	2746.86	1673.43	2040.83	2259.82	1630.01	2336.99	2572.23	2431.35	0.412952	0.109619	3.76715	0.000165	0.000305	SSU ribosomal protein S2p (SAe)	NA	K02967	RP-S2, MRPS2, rpsB; small subunit ribosomal protein S2	304	03010 03011	Ribosome [PATH:ko03010], Ribosome [BR:ko03011],	09122 09182	09120 09180
D|1136176.5.peg.668	1	756500	757345	+	846	2463	2529	2174	2085	2328	2500	611	793	1188	581	1034	1029	1659.75	1769.59	1534.56	1537.54	1539.27	1632.32	925.308	1109.24	1561.76	890.908	1463.63	1540.65	1430.38	0.3683	0.141013	2.61182	0.00900621	0.0134817	Translation elongation factor Ts	NA	K02357	tsf, TSFM; elongation factor Ts	228	03012 03029	Translation factors [BR:ko03012], Mitochondrial biogenesis [BR:ko03029],	09182	09180
D|1136176.5.peg.669	1	757504	758235	+	732	577	487	463	465	479	554	89	129	122	95	112	100	388.824	340.764	326.817	342.904	316.714	361.722	134.783	180.444	160.383	145.673	158.536	149.723	250.607	1.15756	0.0856138	13.5207	1.18e-41	1.39e-40	Uridine monophosphate kinase (EC 2.7.4.22)	KEGG_ENZYME:2.7.4.22	K09903	pyrH; uridylate kinase [EC:2.7.4.22]	271	00240	Pyrimidine metabolism [PATH:ko00240],	09104	09100
D|1136176.5.peg.670	1	758334	758891	+	558	740	722	683	636	730	732	293	348	348	301	318	321	498.665	505.198	482.108	469.004	482.675	477.943	443.724	486.778	457.486	461.555	450.129	480.609	474.656	0.0686015	0.0507187	1.35259	0.176187	0.214555	Ribosome recycling factor	NA	K02838	frr, MRRF, RRF; ribosome recycling factor	148	03012	Translation factors [BR:ko03012],	09182	09180
D|1136176.5.peg.671	1	758990	759742	+	753	503.5	468.5	490.5	411	484	529.5	209.5	202	217	181.5	202.5	184	338.957	327.469	345.875	303.083	320.02	345.398	316.513	282.555	285.271	277.546	285.931	275.49	308.676	0.202037	0.0643605	3.13914	0.00169442	0.00276856	Undecaprenyl diphosphate synthase (EC 2.5.1.31)	KEGG_ENZYME:2.5.1.31	K00806	uppS; undecaprenyl diphosphate synthase [EC:2.5.1.31]	168	00550 00900 01006	Peptidoglycan biosynthesis [PATH:ko00550], Terpenoid backbone biosynthesis [PATH:ko00900], Prenyltransferases [BR:ko01006],	09107 09109 09181	09100 09180
D|1136176.5.peg.672	1	759758	760600	+	843	430.5	430.5	433.5	391	435	442.5	125.5	171	164	140.5	156.5	141	289.765	300.88	305.641	288.334	287.621	288.594	189.302	239.193	215.597	214.677	220.818	211.109	254.294	0.445873	0.0679325	6.56347	5.26e-11	1.61e-10	Phosphatidate cytidylyltransferase (EC 2.7.7.41)	KEGG_ENZYME:2.7.7.41	K00981	E2.7.7.41, CDS1, CDS2, cdsA; phosphatidate cytidylyltransferase [EC:2.7.7.41]	138	00564 04070	Glycerophospholipid metabolism [PATH:ko00564], Phosphatidylinositol signaling system [PATH:ko04070],	09103 09132	09100 09130
D|1136176.5.peg.673	1	760652	761860	+	1209	2308.5	2241	2292	2023	2329.5	2378.5	1126	1115	1085.5	1234.5	1039	1053.5	1555.3	1568.07	1617.85	1491.82	1539.93	1552.66	1705.23	1559.65	1426.36	1892.22	1470.7	1576.58	1579.7	-0.0455275	0.0648311	-0.702247	0.482525	0.531155	1-deoxy-D-xylulose 5-phosphate reductoisomerase (EC 1.1.1.267)	KEGG_ENZYME:1.1.1.267	K00099	dxr; 1-deoxy-D-xylulose-5-phosphate reductoisomerase [EC:1.1.1.267]	261	00900	Terpenoid backbone biosynthesis [PATH:ko00900],	09109	09100
D|1136176.5.peg.674	1	761857	763215	+	1359	6037.5	5860	5469	5090	5875.5	6167.5	2011	2187	2717.5	1894.5	2452	2361.5	4068.16	4100.36	3860.39	3753.51	3884.54	4026.6	3045.49	3059.15	3571.81	2904.27	3470.8	3534.95	3606.67	0.274374	0.059387	4.62011	3.84e-06	8.3e-06	Membrane-associated zinc metalloprotease	NA	K11749	rseP; regulator of sigma E protease [EC:3.4.24.-]	280	04112 01002	Cell cycle - Caulobacter [PATH:ko04112], Peptidases and inhibitors [BR:ko01002],	09143 09181	09140 09180
D|1136176.5.peg.675	1	763264	765669	+	2406	15095.5	14221.5	13077	12913	14101.5	14499	3466	3830	4536	3441.5	4008.5	3941	10172.1	9950.73	9230.64	9522.4	9323.56	9466.79	5248.96	5357.36	5963.09	5276.44	5673.32	5900.57	7590.5	0.786832	0.0449282	17.5131	1.14e-68	2.87e-67	Outer membrane protein assembly factor YaeT precursor	NA	K07277	SAM50, TOB55, bamA; outer membrane protein insertion porin family	530	03029 02000	Mitochondrial biogenesis [BR:ko03029], Transporters [BR:ko02000],	09182 09183	09180
D|1136176.5.peg.676	1	765688	766197	+	510	4182	3951.5	3813	3711.5	4167.5	4093.5	799.5	1005.5	1079	881	1046.5	999	2818.13	2764.6	2691.48	2736.59	2755.21	2672.43	1210.02	1405.78	1418.47	1350.93	1480.61	1495.73	2066.66	0.97464	0.0475875	20.481	3.18e-93	1.31e-91	Outer membrane protein H precursor	NA	K06142	hlpA, ompH; outer membrane protein	66	99992	Structural proteins,	09193	09190
D|1136176.5.peg.677	1	766204	767235	+	1032	5172.5	5046	4403	4335.5	4876	5027.5	1379.5	1650.5	1833	1423.5	1762	1647	3485.26	3530.79	3107.94	3196.75	3224	3282.26	2088.38	2308	2409.69	2182.03	2494.11	2465.93	2814.6	0.507062	0.054782	9.256	2.12e-20	1.14e-19	UDP-3-O-[3-hydroxymyristoyl] glucosamine N-acyltransferase (EC 2.3.1.191)	KEGG_ENZYME:2.3.1.191	K02536	lpxD; UDP-3-O-[3-hydroxymyristoyl] glucosamine N-acyltransferase [EC:2.3.1.191]	228	00540 01005	Lipopolysaccharide biosynthesis [PATH:ko00540], Lipopolysaccharide biosynthesis proteins [BR:ko01005],	09107 09181	09100 09180
D|1136176.5.peg.678	1	767329	767781	+	453	457	454.5	462.5	397.5	445.5	471.5	182	209.5	228	225.5	180	190.5	307.959	317.673	326.111	292.759	294.233	307.529	275.624	292.347	299.732	345.016	254.79	284.473	299.854	0.0766023	0.0701992	1.09121	0.275179	0.320017	3-hydroxyacyl-[acyl-carrier-protein] dehydratase%2C FabZ form (EC 4.2.1.59)	KEGG_ENZYME:4.2.1.59	K02372	fabZ; 3-hydroxyacyl-[acyl-carrier-protein] dehydratase [EC:4.2.1.59]	118	00061 00780 01004	Fatty acid biosynthesis [PATH:ko00061], Biotin metabolism [PATH:ko00780], Lipid biosynthesis proteins [BR:ko01004],	09103 09108 09181	09100 09180
D|1136176.5.peg.679	1	767783	768571	+	789	821	799.5	799.5	734.5	841.5	809.5	364	380.5	486	353.5	384	351.5	553.248	559.077	563.989	541.272	556.068	528.218	551.247	531.539	638.903	541.292	543.552	525.526	552.827	-0.0152859	0.0543518	-0.28124	0.778526	0.810296	Acyl-[acyl-carrier-protein]--UDP-N-acetylglucosamine O-acyltransferase (EC 2.3.1.129)	KEGG_ENZYME:2.3.1.129	K00677	lpxA; UDP-N-acetylglucosamine acyltransferase [EC:2.3.1.129]	156	00540 01503 01005	Lipopolysaccharide biosynthesis [PATH:ko00540], Cationic antimicrobial peptide (CAMP) resistance [PATH:ko01503], Lipopolysaccharide biosynthesis proteins [BR:ko01005],	09107 09175 09181	09100 09160 09180
D|1136176.5.peg.680	1	768700	769896	+	1197	597	562	536	523	561	559	203	202	210	161	194	217	402.301	393.243	378.345	385.675	370.932	364.986	307.426	282.555	276.069	246.878	274.607	324.898	333.993	0.423179	0.0660213	6.40973	1.46e-10	4.35e-10	Lipid-A-disaccharide synthase (EC 2.4.1.182)	KEGG_ENZYME:2.4.1.182	K00748	lpxB; lipid-A-disaccharide synthase [EC:2.4.1.182]	234	00540 01005	Lipopolysaccharide biosynthesis [PATH:ko00540], Lipopolysaccharide biosynthesis proteins [BR:ko01005],	09107 09181	09100 09180
D|1136176.5.peg.681	1	769934	770554	+	621	581	504	493	511	528	551	126	152	133	133	155	114	391.519	352.659	347.993	376.825	349.113	359.763	190.816	212.616	174.844	203.943	219.402	170.684	279.181	0.893727	0.0744419	12.0057	3.32e-33	2.83e-32	Ribonuclease HII (EC 3.1.26.4)	KEGG_ENZYME:3.1.26.4	K03470	rnhB; ribonuclease HII [EC:3.1.26.4]	191	03030 03032	DNA replication [PATH:ko03030], DNA replication proteins [BR:ko03032],	09124 09182	09120 09180
D|1136176.5.peg.682	1	770716	774195	+	3480	3910	3724	3656	3685	3886	4001	1081	1174	1268	1107	1206	1087	2634.84	2605.76	2580.65	2717.42	2569.42	2612.36	1637.08	1642.18	1666.93	1697.48	1707.09	1627.48	2141.56	0.655516	0.0299793	21.8656	5.52e-106	3.01e-104	DNA polymerase III alpha subunit (EC 2.7.7.7)	KEGG_ENZYME:2.7.7.7	K02337	dnaE; DNA polymerase III subunit alpha [EC:2.7.7.7]	957	03030 03430 03440 03032 03400	DNA replication [PATH:ko03030], Mismatch repair [PATH:ko03430], Homologous recombination [PATH:ko03440], DNA replication proteins [BR:ko03032], DNA repair and recombination proteins [BR:ko03400],	09124 09182	09120 09180
D|1136176.5.peg.683	1	774241	775200	+	960	1823	1692	1581	1590	1744	1810	491	576	699	567	604	572	1228.47	1183.93	1115.98	1172.51	1153.13	1181.8	743.578	805.702	918.915	869.44	854.962	856.413	1007.07	0.477785	0.0505496	9.45181	3.33e-21	1.84e-20	Acetyl-coenzyme A carboxyl transferase alpha chain (EC 6.4.1.2)	KEGG_ENZYME:6.4.1.2	K01962	accA; acetyl-CoA carboxylase carboxyl transferase subunit alpha [EC:6.4.1.2 2.1.3.15]	272	00620 00640 00720 00061	Pyruvate metabolism [PATH:ko00620], Propanoate metabolism [PATH:ko00640], Carbon fixation pathways in prokaryotes [PATH:ko00720], Fatty acid biosynthesis [PATH:ko00061],	09101 09102 09103	09100
D|1136176.5.peg.684	1	775325	776665	+	1341	4744	4410	4352	4458	4728	4617	350	335	389	397	336	345	3196.85	3085.77	3071.94	3287.45	3126.15	3014.56	530.045	468.594	511.385	608.762	475.608	516.543	1824.47	2.59593	0.0558225	46.5033	0	0	tRNA(Ile)-lysidine synthetase (EC 6.3.4.19)	KEGG_ENZYME:6.3.4.19	K04075	tilS, mesJ; tRNA(Ile)-lysidine synthase [EC:6.3.4.19]	172	03016	Transfer RNA biogenesis [BR:ko03016],	09182	09180
D|1136176.5.peg.685	1	776724	777035	+	312	17506	13254	13620	15558	14272	14879	3091	2202	1547	4170	1110	1929	11796.8	9274.1	9613.92	11472.9	9436.62	9714.9	4681.06	3080.13	2033.71	6394.3	1571.2	2888.15	6829.81	1.57014	0.314413	4.99389	5.92e-07	1.39e-06	Cytochrome c553	NA			51
D|1136176.5.peg.686	1	777166	777504	+	339	326	245	272	300	261	273	44	47	47	61	49	58	219.682	171.432	191.996	221.228	172.573	178.249	66.6343	65.743	61.7869	93.5377	69.3595	86.8391	133.255	1.38484	0.124465	11.1264	9.34e-29	6.89e-28	Nitrogen regulatory protein P-II	NA	K04751	glnB; nitrogen regulatory protein P-II 1	99	02020	Two-component system [PATH:ko02020],	09132	09130
D|1136176.5.peg.687	1	777565	778407	+	843	468	383	384	383	389	412	115	96	93	129	140	91	315.372	267.993	271.053	282.435	257.206	269.006	174.158	134.284	122.259	197.809	198.17	136.248	218.833	0.791713	0.114983	6.88547	5.76e-12	1.88e-11	D01199556: hypothetical protein	NA			81
D|1136176.5.peg.688	1	778518	779204	-	687	446.5	424	402	465.5	439	457	133	144.5	138.5	118.5	115	109.5	300.547	296.682	283.759	342.904	290.266	298.388	201.417	201.425	181.417	180.942	162.782	163.198	241.977	0.731283	0.0802649	9.11087	8.17e-20	4.26e-19	D01199992: hypothetical protein	NA			49
D|1136176.5.peg.689	1	779201	780772	-	1572	325.5	307	309	327.5	327	326	175	140.5	142.5	158.5	140	140.5	219.008	214.814	218.113	241.139	216.212	212.854	265.023	195.83	186.675	242.278	198.17	209.612	218.311	0.0308282	0.0851859	0.361893	0.717432	0.756891	Membrane-bound lytic murein transglycosylase D precursor (EC 3.2.1.-)	KEGG_ENZYME:3.2.1.-	K08307	mltD, dniR; membrane-bound lytic murein transglycosylase D [EC:4.2.2.-]	280	01011	Peptidoglycan biosynthesis and degradation proteins [BR:ko01011],	09181	09180
D|1136176.5.peg.690	1	780843	781601	-	759	2549	2346	2356	2339	2506	2550	1601	1629	1678	1846	1442	1385	1717.7	1641.54	1663.03	1724.84	1656.96	1664.96	2424.58	2278.62	2205.92	2830.66	2041.15	2073.66	1993.64	-0.460098	0.0739398	-6.2226	4.89e-10	1.41e-09	Hydroxyacylglutathione hydrolase (EC 3.1.2.6)	KEGG_ENZYME:3.1.2.6	K01069	gloB, gloC, HAGH; hydroxyacylglutathione hydrolase [EC:3.1.2.6]	144	00620	Pyruvate metabolism [PATH:ko00620],	09101	09100
D|1136176.5.peg.691	1	781655	782437	+	783	2571	2528	2489	2434	2704	2738	1185	1317	1396	1279	1304	1210	1732.52	1768.89	1756.91	1794.9	1787.88	1787.71	1794.58	1842.2	1835.2	1961.22	1845.81	1811.64	1809.96	-0.0611057	0.03082	-1.98267	0.0474047	0.063728	D005121: SAM-dependent methyltransferase (EC 2.1.1.-)	KEGG_ENZYME:2.1.1.-			110
D|1136176.5.peg.692	1	782554	783018	-	465	129	101	92	126	113	128	63	67	82	67	64	72	86.9294	70.6718	64.9399	92.9159	74.7154	83.5747	95.4082	93.7188	107.798	102.738	90.592	107.8	89.3169	-0.336755	0.113704	-2.96167	0.00305972	0.00484422	Ribonuclease HI (EC 3.1.26.4)	KEGG_ENZYME:3.1.26.4	K03469	rnhA, RNASEH1; ribonuclease HI [EC:3.1.26.4]	151	03030 03032	DNA replication [PATH:ko03030], DNA replication proteins [BR:ko03032],	09124 09182	09120 09180
D|1136176.5.peg.693	1	783075	783842	+	768	403.5	382	382	372	420.5	423.5	247	255	254.5	221	208.5	178	271.57	267.293	269.642	274.323	277.703	276.188	374.061	356.691	333.912	338.882	294.424	266.506	300.1	-0.263271	0.0738778	-3.5636	0.000366	0.00065	DNA polymerase III epsilon subunit (EC 2.7.7.7)	KEGG_ENZYME:2.7.7.7	K02342	dnaQ; DNA polymerase III subunit epsilon [EC:2.7.7.7]	159	03030 03430 03440 03032 03400	DNA replication [PATH:ko03030], Mismatch repair [PATH:ko03430], Homologous recombination [PATH:ko03440], DNA replication proteins [BR:ko03032], DNA repair and recombination proteins [BR:ko03400],	09124 09182	09120 09180
D|1136176.5.peg.694	1	783852	785099	+	1248	1112.5	1007	868	1000	1027.5	1013.5	195	221	199.5	211	190.5	174	749.345	704.619	612.694	737.427	679.051	661.415	295.311	309.132	261.608	323.548	268.945	260.517	488.634	1.27097	0.0761241	16.696	1.4e-62	2.97e-61	D004599: Hypothetical protein	NA			66
D|1136176.5.peg.695	1	785297	787762	-	2466	24413	25157	24436	20475	27770	25725	47047	42631	35606	23263	30924	31858	16451.2	17602.9	17248.6	15098.8	18361.5	16796.5	71248.7	59631.7	46808.2	35671.6	43772.9	47698.6	33865.9	-1.58568	0.138598	-11.4409	2.61e-30	2.04e-29	Butyryl-CoA dehydrogenase (EC 1.3.99.2)	KEGG_ENZYME:1.3.99.2	K06445	fadE; acyl-CoA dehydrogenase [EC:1.3.99.-]	570	00071	Fatty acid degradation [PATH:ko00071],	09103	09100
D|1136176.5.peg.696	1	788093	788668	+	576	751	716	692	699	754	746	426	488	512	405	447	391	506.077	501	488.461	515.462	498.543	487.084	645.141	682.608	673.083	621.029	632.728	585.415	569.719	-0.359631	0.0491038	-7.32389	2.41e-13	8.56e-13	Phosphoheptose isomerase 1 (EC 5.3.1.-)	KEGG_ENZYME:5.3.1.-	K03271	gmhA, lpcA; D-sedoheptulose 7-phosphate isomerase [EC:5.3.1.28]	166	00540 01005	Lipopolysaccharide biosynthesis [PATH:ko00540], Lipopolysaccharide biosynthesis proteins [BR:ko01005],	09107 09181	09100 09180
D|1136176.5.peg.697	1	788733	789578	+	846	1031	943	939	873	997	945	618	540	632	460	588	540	694.761	659.837	662.81	643.774	659.215	617.016	935.909	755.345	830.836	705.366	832.314	808.502	733.807	-0.306279	0.063621	-4.81411	1.48e-06	3.32e-06	Predicted glutamine amidotransferase	NA			260
D|1136176.5.peg.698	1	789679	790353	-	675	251	219	212	241	230	222	70	94	68	51	73	64	169.142	153.239	149.644	177.72	152.076	144.95	106.009	131.486	89.3938	78.2036	103.331	95.8224	129.251	0.644987	0.108381	5.95112	2.66e-09	7.4e-09	Phosphoribosylglycinamide formyltransferase (EC 2.1.2.2)	KEGG_ENZYME:2.1.2.2	K11175	purN; phosphoribosylglycinamide formyltransferase 1 [EC:2.1.2.2]	181	00230 00670	Purine metabolism [PATH:ko00230], One carbon pool by folate [PATH:ko00670],	09104 09108	09100
D|1136176.5.peg.699	1	790486	791526	-	1041	371	345	341	309	355	356	165	170	148	119	147	153	250.006	241.404	240.701	227.865	234.725	232.442	249.879	237.794	194.563	182.475	208.078	229.076	227.417	0.133859	0.0766619	1.74609	0.0807954	0.104559	Phosphoribosylformylglycinamidine cyclo-ligase (EC 6.3.3.1)	KEGG_ENZYME:6.3.3.1	K01933	purM; phosphoribosylformylglycinamidine cyclo-ligase [EC:6.3.3.1]	283	00230	Purine metabolism [PATH:ko00230],	09104	09100
D|1136176.5.peg.700	1	791696	792322	+	627	1846	1808	1908	1829	2151	2065	922	805	885	863	841	862	1243.97	1265.09	1346.8	1348.75	1422.24	1348.29	1396.29	1126.02	1163.43	1323.33	1190.44	1290.61	1288.77	0.0916081	0.0602362	1.52081	0.128306	0.161277	Uracil phosphoribosyltransferase (EC 2.4.2.9)	KEGG_ENZYME:2.4.2.9	K00761	upp, UPRT; uracil phosphoribosyltransferase [EC:2.4.2.9]	189	00240	Pyrimidine metabolism [PATH:ko00240],	09104	09100
D|1136176.5.peg.701	1	792464	793702	-	1239	439	418	386	377	413	436	163	172	163	147	164	142	295.83	292.483	272.465	278.01	273.075	284.676	246.85	240.591	214.282	225.41	232.142	212.606	255.702	0.307421	0.0673403	4.56518	4.99e-06	1.07e-05	Uracil permease	NA	K02824	uraA, pyrP; uracil permease	398	02000	Transporters [BR:ko02000],	09183	09180
D|1136176.5.peg.702	1	793856	793972	+	117	17.5	20.5	18	21.5	19.5	18.5	5.5	9	4	4	1	6	11.4558	13.9944	12.7056	15.486	12.5628	11.7527	7.57208	12.5891	5.25846	6.13362	1.4155	8.98335	9.99245	0.894645	0.322828	2.77127	0.00558373	0.00857132	hypothetical protein	NA			NA
D|1136176.5.peg.703	1	793980	795245	+	1266	1195.5	1224.5	1150	1192.5	1277.5	1266.5	685.5	708	696	635	759	643	805.276	856.458	811.748	879.013	844.35	826.606	1037.37	990.341	914.972	973.712	1074.36	962.716	914.744	-0.244785	0.0472598	-5.17956	2.22e-07	5.38e-07	D01200261: hypothetical protein	NA	K09938	K09938; uncharacterized protein	64	99997	Function unknown,	09194	09190
D|1136176.5.peg.704	1	795376	795813	-	438	132	136.5	109.5	114.5	100.5	127	41.5	45	51.5	43.5	45.5	41.5	88.951	95.162	76.9396	84.0667	66.1198	82.9217	62.091	62.9454	67.0453	65.9364	63.6975	61.3862	73.1052	0.365232	0.124323	2.93776	0.00330593	0.00520384	D01201104: hypothetical protein	NA			63
D|1136176.5.peg.705	1	795810	796403	-	594	615.5	649	573.5	534.5	635.5	687.5	249	294	377.5	191.5	303	287	414.431	454.119	404.462	393.786	419.861	448.561	377.089	411.243	495.61	292.88	428.896	429.704	414.22	0.0559106	0.0996025	0.561337	0.574568	0.621712	Flavoprotein WrbA	NA	K03809	wrbA; NAD(P)H dehydrogenase (quinone) [EC:1.6.5.2]	106	00130	Ubiquinone and other terpenoid-quinone biosynthesis [PATH:ko00130],	09108	09100
D|1136176.5.peg.706	1	796410	796760	-	351	768.5	785.5	703	701	759	767.5	241.5	286	311	216	326.5	294.5	517.533	549.281	496.225	516.937	501.849	500.795	364.974	400.053	408.845	331.215	461.453	440.184	457.445	0.355311	0.071396	4.97663	6.47e-07	1.51e-06	Arsenate reductase (EC 1.20.4.1)	KEGG_ENZYME:1.20.4.1	K00537	arsC; arsenate reductase (glutaredoxin) [EC:1.20.4.1]	77	99980	Enzymes with EC numbers,	09191	09190
D|1136176.5.peg.707	1	796881	798335	-	1455	1132	1079	1083	1053	1170	1150	508	533	603	502	597	550	762.822	754.999	764.455	776.511	773.602	750.866	769.323	745.554	792.712	769.769	845.053	823.474	777.428	-0.0506122	0.0423868	-1.19406	0.232456	0.27513	Exported zinc metalloprotease YfgC precursor	NA	K01423	bepA; beta-barrel assembly-enhancing protease [EC:3.4.-.-]	256	01002	Peptidases and inhibitors [BR:ko01002],	09181	09180
D|1136176.5.peg.708	1	798514	798753	+	240	723.5	725	688.5	641	736	754	467	423.5	461	402	403.5	393	487.209	507.297	485.637	472.691	486.642	492.307	707.232	591.687	606.037	616.429	570.446	588.41	551.002	-0.3267	0.0548309	-5.95831	2.55e-09	7.09e-09	D028274: hypothetical protein	NA	K04085	tusA, sirA; tRNA 2-thiouridine synthesizing protein A [EC:2.8.1.-]	14	04122 03016	Sulfur relay system [PATH:ko04122], Transfer RNA biogenesis [BR:ko03016],	09123 09182	09120 09180
D|1136176.5.peg.709	1	798746	799822	+	1077	1514.5	1464	1437.5	1361	1454	1498	1053	1040.5	1029	889	998.5	933	1020.24	1024.39	1014.33	1003.64	961.382	978.085	1594.68	1454.74	1352.74	1363.2	1412.67	1396.91	1214.75	-0.514353	0.045606	-11.2782	1.68e-29	1.27e-28	Putative permease PerM ( YfgO)	NA	K03548	perM; putative permease	283	02000	Transporters [BR:ko02000],	09183	09180
D|1136176.5.peg.710	1	799927	800064	-	138	131	119	144	135	143	140	63	69	56	74	50	57	88.2771	83.2668	101.645	99.5527	94.5513	91.4098	95.4082	96.5163	73.6184	113.472	70.775	85.3419	91.1529	0.0674225	0.114292	0.589914	0.555248	0.603339	Thiol peroxidase%2C Bcp-type (EC 1.11.1.15)	KEGG_ENZYME:1.11.1.15			NA
D|1136176.5.peg.711	1	800509	801675	-	1167	1272	1246	1225	1241	1298	1390	754	791	773	641	867	647	857.164	871.852	864.688	915.147	858.235	907.569	1141.87	1106.44	1016.2	982.912	1227.24	968.705	976.502	-0.28908	0.0607377	-4.75948	1.94e-06	4.3e-06	hypothetical protein	NA			4
D|1136176.5.peg.712	1	801749	802606	-	858	857	789	840	856	960	899	669	742	633	552	703	601	577.508	552.08	592.929	631.238	634.75	586.981	1013.14	1037.9	832.151	846.439	995.096	899.833	766.671	-0.653556	0.0681435	-9.59089	8.73e-22	4.95e-21	D01200970: hypothetical protein	NA			11
D|1136176.5.peg.713	1	802854	803450	-	597	556	433	407	375	433	426	120	168	157	143	134	136	374.672	302.979	287.288	276.535	286.299	278.147	181.73	234.996	206.394	219.277	189.677	203.623	253.468	0.547154	0.0976406	5.60376	2.1e-08	5.47e-08	Integrase	NA			134
D|1136176.5.peg.714	1	803611	805083	-	1473	1130	1122	1002	981	1115	1122	391	454	496	388	417	402	761.475	785.087	707.28	723.416	737.236	732.584	592.136	635.049	652.049	594.961	590.263	601.885	676.118	0.277194	0.0483638	5.73145	9.96e-09	2.66e-08	Retron-type RNA-directed DNA polymerase (EC 2.7.7.49)	KEGG_ENZYME:2.7.7.49	K00986	ltrA; RNA-directed DNA polymerase [EC:2.7.7.49]	236	99980	Enzymes with EC numbers,	09191	09190
D|1136176.5.peg.715	1	806115	807098	+	984	304.5	290.5	315	300	357	323	178	212	253	142	239.5	198.5	204.857	202.919	222.348	221.228	236.048	210.895	269.566	296.543	332.597	217.743	338.304	296.451	254.125	-0.434739	0.094814	-4.58517	4.54e-06	9.76e-06	hypothetical protein	NA			71
D|1136176.5.peg.716	1	807106	808692	-	1587	217.5	235.5	228	219	257	244	187	184	150	145	168.5	143.5	146.23	164.434	160.938	161.497	169.928	159.314	283.196	257.377	197.192	222.344	237.804	214.103	197.863	-0.551344	0.0873517	-6.31177	2.76e-10	8.07e-10	hypothetical protein	NA			46
D|1136176.5.peg.717	1	809014	809457	+	444	38500	36722	31359	29373	34504	37308	10182	11373	13643	10072	12405	13950	25944	25695.1	22135.3	21660.5	22814	24359.4	15419.8	15908.4	17935.3	15444.4	17559.3	20886.3	20480.2	0.467261	0.083438	5.6001	2.14e-08	5.58e-08	hypothetical protein	NA			29
D|1136176.5.peg.718	1	809824	811476	+	1653	500	463	477.5	451	492.5	483.5	290.5	308	310	252	314.5	249	336.936	323.971	336.699	332.58	325.31	315.364	439.18	430.827	407.53	386.418	444.467	372.809	371.007	-0.333495	0.0587298	-5.67845	1.36e-08	3.58e-08	D131328: Predicted ATP-dependent endonuclease of the OLD family	NA	K07459	ybjD; putative ATP-dependent endonuclease of the OLD family	131	99976	Replication and repair,	09192	09190
D|1136176.5.peg.719	1	811469	812596	+	1128	684	637	638.5	644	642.5	644.5	290.5	303	328	292	270.5	276	460.928	445.722	450.344	474.903	424.489	420.485	439.18	423.833	431.193	447.754	382.185	413.234	434.521	0.0769957	0.0578348	1.3313	0.183089	0.222196	hypothetical protein	NA	K03657	uvrD, pcrA; DNA helicase II / ATP-dependent DNA helicase PcrA [EC:3.6.4.12]	63	03420 03430 03400	Nucleotide excision repair [PATH:ko03420], Mismatch repair [PATH:ko03430], DNA repair and recombination proteins [BR:ko03400],	09124 09182	09120 09180
D|1136176.5.peg.720	1	812967	813833	-	867	323	312	334	331	370	340	217	240	235	202	215	210	217.66	218.313	235.76	244.088	244.643	221.995	328.628	335.709	308.934	309.748	304.332	314.417	273.686	-0.460472	0.0652651	-7.05542	1.72e-12	5.78e-12	Acetyl-coenzyme A carboxyl transferase beta chain (EC 6.4.1.2)	KEGG_ENZYME:6.4.1.2	K01963	accD; acetyl-CoA carboxylase carboxyl transferase subunit beta [EC:6.4.1.2 2.1.3.15]	210	00620 00640 00720 00061	Pyruvate metabolism [PATH:ko00620], Propanoate metabolism [PATH:ko00640], Carbon fixation pathways in prokaryotes [PATH:ko00720], Fatty acid biosynthesis [PATH:ko00061],	09101 09102 09103	09100
D|1136176.5.peg.721	1	813942	814847	+	906	422	411	439	399	440	403	237	315	263	248	264	204	284.374	287.585	309.876	294.234	290.927	263.13	358.916	440.618	345.744	380.284	373.692	305.434	327.901	-0.350836	0.0794584	-4.41534	1.01e-05	2.1e-05	Cyn operon transcriptional activator	NA			102
D|1136176.5.peg.722	1	815295	815459	-	165	62	58	51	68	59	64	24	21	30	30	21	20	41.78	40.5838	35.9993	50.1451	39.0107	41.7873	36.346	29.3745	39.4384	46.0021	29.7255	29.9445	38.3448	0.242054	0.160639	1.50682	0.131857	0.165106	hypothetical protein	NA			NA
D|1136176.5.peg.723	1	815618	817318	-	1701	364.5	325	360	336	361.5	388.5	144.5	213	187.5	157	153.5	131.5	245.289	227.409	254.113	247.776	238.693	253.336	218.076	297.942	245.833	240.745	216.571	196.137	240.16	0.049129	0.0863585	0.568896	0.569426	0.6173	hypothetical protein	NA			109
D|1136176.5.peg.724	1	817302	819035	-	1734	668.5	684	705	695	740.5	761.5	367.5	384	403.5	316	342.5	326.5	450.146	478.609	497.637	512.512	489.287	496.877	555.79	537.134	529.79	484.556	484.101	488.096	500.378	-0.0751817	0.0559414	-1.34394	0.178969	0.217556	hypothetical protein	NA			13
D|1136176.5.peg.725	1	819631	821010	-	1380	156	147.5	143.5	121.5	159	169	78	80.5	81	75.5	84.5	82.5	105.124	102.859	100.939	89.2287	105.131	110.345	118.124	111.903	106.484	115.005	118.902	122.772	108.901	-0.171517	0.0957181	-1.7919	0.0731488	0.0954884	FOG: GGDEF domain	NA			180
D|1136176.5.peg.726	1	821004	821504	-	501	52	39.5	38.5	39.5	47	51	29	10.5	12	15.5	11.5	20.5	35.0413	27.2891	26.823	28.7597	31.0763	33.2993	43.918	13.9879	15.7754	23.0011	15.5705	29.9445	27.0405	0.377234	0.217646	1.73325	0.0830519	0.107299	Response regulator	NA			11
D|1136176.5.peg.727	1	821638	821982	+	345	107	100	99	97	113	116	65	73	71	58	64	60	72.1042	69.9721	69.8809	71.5305	74.7154	75.7395	98.437	102.111	93.3376	88.9375	90.592	89.8335	83.0993	-0.375998	0.105183	-3.5747	0.000351	0.000625	Putative transcriptional regulator	NA			30
D|1136176.5.peg.728	1	822030	822494	-	465	536	538	517	472	542	586	213	267	298	247	237	246	361.195	376.45	364.934	348.066	358.369	382.615	322.57	373.476	391.755	378.751	335.473	368.317	363.498	0.0131612	0.0607069	0.2168	0.828364	0.852417	Thiol peroxidase%2C Bcp-type (EC 1.11.1.15)	KEGG_ENZYME:1.11.1.15	K03564	BCP, PRXQ, DOT5; thioredoxin-dependent peroxiredoxin [EC:1.11.1.24]	104	99980	Enzymes with EC numbers,	09191	09190
D|1136176.5.peg.729	1	822608	823105	-	498	207.5	181.5	209	180	216	221	49	52.5	58.5	40.5	53	60	139.491	126.649	147.526	132.737	142.819	144.297	74.2063	72.7369	76.2476	61.3362	75.0215	89.8335	106.908	0.891148	0.105343	8.45946	2.69e-17	1.22e-16	D01204656: hypothetical protein	NA			7
D|1136176.5.peg.730	1	823105	825300	-	2196	649	656	672.5	610.5	668.5	688.5	254	263	295	216.5	262.5	217.5	437.342	459.017	474.343	449.831	441.68	449.214	384.661	367.881	387.811	331.215	370.861	324.898	406.563	0.320689	0.0581839	5.51163	3.56e-08	9.11e-08	D01200517: hypothetical protein	NA			7
D|1136176.5.peg.731	1	825315	827645	-	2331	580	539.5	546.5	561.5	568.5	591.5	296	310	290.5	306	273.5	246	390.845	377.149	385.404	413.697	375.561	385.88	448.267	433.624	381.238	469.222	386.431	368.317	401.303	-0.0936685	0.0656311	-1.4272	0.153523	0.189234	D01200949: hypothetical protein	NA			1
D|1136176.5.peg.732	1	827645	829048	-	1404	243.5	221	215	206	241	255	168	194.5	220	177	179	168.5	163.751	154.638	151.762	151.91	159.349	166.496	254.422	271.365	289.215	271.413	253.374	251.534	211.602	-0.74799	0.0713484	-10.4836	1.03e-25	6.75e-25	MutL protein	NA			NA
D|1136176.5.peg.733	1	829119	829472	-	354	76	73.5	74.5	62.5	73	77	78.5	97	99.5	74	98.5	90	51.2142	51.0796	52.2342	45.7205	48.2675	50.2754	118.124	135.682	130.147	113.472	138.719	134.75	89.1405	-1.3691	0.107109	-12.7822	2.06e-37	2.11e-36	bacterioferritin comigratory protein	NA	K03564	BCP, PRXQ, DOT5; thioredoxin-dependent peroxiredoxin [EC:1.11.1.24]	57	99980	Enzymes with EC numbers,	09191	09190
D|1136176.5.peg.734	1	829485	830027	-	543	151	152.5	169.5	138.5	171	163	143.5	144	134.5	100	138.5	119	101.755	106.358	119.292	101.765	113.065	106.427	216.561	201.425	176.158	153.34	195.339	178.17	147.471	-0.789457	0.0914412	-8.6335	5.95e-18	2.8e-17	Glycine cleavage system transcriptional antiactivator GcvR	NA	K03567	gcvR; glycine cleavage system transcriptional repressor	71	02026 03000	Biofilm formation - Escherichia coli [PATH:ko02026], Transcription factors [BR:ko03000],	09145 09182	09140 09180
D|1136176.5.peg.735	1	830401	831279	+	879	1530	1404	1401	1365	1544	1581	654	652	834	614	751	666	1031.02	982.408	988.921	1006.59	1020.89	1032.28	990.428	912.009	1096.39	941.51	1063.04	997.152	1005.22	0.0138433	0.0483595	0.286259	0.77468	0.807197	4-hydroxy-tetrahydrodipicolinate synthase (EC 4.3.3.7)	KEGG_ENZYME:4.3.3.7	K01714	dapA; 4-hydroxy-tetrahydrodipicolinate synthase [EC:4.3.3.7]	211	00300 00261	Lysine biosynthesis [PATH:ko00300], Monobactam biosynthesis [PATH:ko00261],	09105 09110	09100
D|1136176.5.peg.736	1	831329	832375	+	1047	1137	1085	1046	941	1111	1169	405	426	544	409	428	444	766.192	759.197	738.338	693.919	734.591	763.272	613.338	595.883	715.15	627.162	605.834	664.768	689.804	0.220521	0.0538263	4.0969	4.19e-05	8.21e-05	Outer membrane protein NlpB%2C lipoprotein component of the protein assembly complex (forms a complex with YaeT%2C YfiO%2C and YfgL)%3B Lipoprotein-34 precursor	NA	K07287	bamC; outer membrane protein assembly factor BamC	170	02000	Transporters [BR:ko02000],	09183	09180
D|1136176.5.peg.737	1	832531	832740	-	210	868.5	813	866	867	972	929.5	492	650.5	590.5	572	606	498	584.92	568.873	611.282	639.35	642.685	606.569	745.092	909.212	775.622	877.107	857.793	745.618	713.677	-0.426772	0.0629598	-6.77849	1.21e-11	3.89e-11	D01201208: hypothetical protein	NA			8
D|1136176.5.peg.738	1	832749	833423	-	675	384.5	368	344	353	392	372.5	69	95.5	135.5	83	91	108	258.767	257.497	242.819	260.312	259.19	242.889	104.495	132.885	177.473	127.273	128.81	161.7	196.176	0.86447	0.0946555	9.1328	6.67e-20	3.49e-19	D009095: D%2CD-carboxypeptidase family protein	NA			135
D|1136176.5.peg.739	1	833469	834605	-	1137	291	294	329	298	323	333	252	266	260	246	300	259	196.097	205.718	232.231	219.753	213.567	217.425	381.633	372.077	341.8	377.218	424.65	387.781	297.496	-0.830212	0.0684263	-12.1329	7.07e-34	6.21e-33	N-succinyl-L%2CL-diaminopimelate desuccinylase (EC 3.5.1.18)	KEGG_ENZYME:3.5.1.18	K01439	dapE; succinyl-diaminopimelate desuccinylase [EC:3.5.1.18]	278	00300 01002	Lysine biosynthesis [PATH:ko00300], Peptidases and inhibitors [BR:ko01002],	09105 09181	09100 09180
D|1136176.5.peg.740	1	834705	835052	-	348	95	79	89	72	97	81	31	38	41	44	40	36	64.0178	55.2779	62.8223	53.0948	64.1362	52.8871	46.9469	53.1539	53.8992	67.4698	56.62	53.9001	57.0188	0.0879766	0.131398	0.669542	0.50315	0.551895	D138056: a glutathione-dependent thiol reductase	NA			61
D|1136176.5.peg.741	1	835258	835545	+	288	390	368	351	388	371	369	93	125	151	110	182	122	262.81	257.497	247.76	286.122	245.305	240.93	140.841	174.848	198.507	168.674	257.621	182.662	221.965	0.452598	0.1116	4.05554	5e-05	9.73e-05	D01199732: hypothetical protein	NA			65
D|1136176.5.peg.742	1	835626	835958	-	333	380	379.5	422	385.5	403	418.5	301	290.5	272	238.5	287	255	256.071	265.194	297.876	283.91	266.463	272.923	455.839	405.648	357.575	364.95	406.248	381.793	334.541	-0.529901	0.0697498	-7.59717	3.03e-14	1.14e-13	putative outer membrane lipoprotein	NA			17
D|1136176.5.peg.743	1	835971	836315	-	345	413	378.5	391	453.5	458	433.5	135	191.5	125	187.5	173	135	278.309	264.494	275.994	334.055	302.829	282.717	204.446	267.168	164.327	286.747	244.881	202.125	259.008	0.345377	0.118443	2.91598	0.00354578	0.00556065	D00922492: hypothetical protein	NA			34
D|1136176.5.peg.744	1	836425	836886	+	462	192	179	181	154	183	157	84	88	118	83	96	90	129.383	125.25	127.762	113.564	120.999	102.51	127.211	123.093	155.124	127.273	135.888	134.75	126.901	-0.162621	0.0952359	-1.70756	0.0877178	0.113044	Arginine/ornithine antiporter ArcD	NA			20
D|1136176.5.peg.745	1	836952	837875	+	924	874	837	815	781	835	878	320	329	448	333	405	394	588.964	585.666	575.283	575.931	552.101	573.27	484.613	460.201	588.947	510.624	573.277	589.907	554.899	0.104589	0.064785	1.6144	0.10644	0.135331	Predicted dye-decolorizing peroxidase (DyP)%2C YfeX-like subgroup	NA	K07223	yfeX; porphyrinogen peroxidase [EC:1.11.1.-]	204	99980	Enzymes with EC numbers,	09191	09190
D|1136176.5.peg.746	1	837997	839130	+	1134	2854.5	2747	2517	2665	2717	2530.5	1404	1250.5	1114	1638	1035	1037	1923.23	1922.13	1776.67	1965.24	1796.48	1651.91	2126.24	1748.48	1464.48	2511.72	1465.04	1552.62	1825.35	0.0223599	0.129046	0.173271	0.862439	0.882982	Flagellin protein FlaF	NA	K02406	fliC, hag; flagellin	183	02020 02040 04621 04626 05132 05131 05134 02035	Two-component system [PATH:ko02020], Flagellar assembly [PATH:ko02040], NOD-like receptor signaling pathway [PATH:ko04621], Plant-pathogen interaction [PATH:ko04626], Salmonella infection [PATH:ko05132], Shigellosis [PATH:ko05131], Legionellosis [PATH:ko05134], Bacterial motility proteins [BR:ko02035],	09132 09142 09151 09159 09171 09183	09130 09140 09150 09160 09180
D|1136176.5.peg.747	1	839147	839260	-	114	59.5	69	65	50	68	57.5	73	54.5	35	34	30	46	39.7584	48.2807	45.8814	36.8714	44.9615	37.2168	110.552	75.5345	46.0115	52.1358	42.465	68.8724	54.0451	-0.640465	0.199781	-3.20583	0.00134673	0.00223929	hypothetical protein	NA			NA
D|1136176.5.peg.748	1	839427	840560	+	1134	6917	6525	5997	5830	6164	5807	5533	4889	3946	6504	3574	3468	4661.17	4565.68	4233.09	4299.2	4075.63	3791.55	8379.26	6838.67	5187.47	9973.26	5059	5192.38	5521.36	-0.66485	0.161747	-4.11042	3.95e-05	7.76e-05	Flagellin protein FlaD	NA	K02406	fliC, hag; flagellin	189	02020 02040 04621 04626 05132 05131 05134 02035	Two-component system [PATH:ko02020], Flagellar assembly [PATH:ko02040], NOD-like receptor signaling pathway [PATH:ko04621], Plant-pathogen interaction [PATH:ko04626], Salmonella infection [PATH:ko05132], Shigellosis [PATH:ko05131], Legionellosis [PATH:ko05134], Bacterial motility proteins [BR:ko02035],	09132 09142 09151 09159 09171 09183	09130 09140 09150 09160 09180
D|1136176.5.peg.749	1	841127	841636	-	510	1836	1990	1842	1718	1991	2055	963	999	1347	869	1111	1031	1237.23	1392.44	1300.21	1266.9	1316.45	1341.77	1458.38	1397.39	1770.79	1332.53	1572.62	1543.64	1410.86	-0.209077	0.0665822	-3.14013	0.00168873	0.00276218	PTS system%2C glucose-specific IIA component	NA	K02777	crr; sugar PTS system EIIA component [EC:2.7.1.-]	146	00010 00500 00520 02060 05111 02026 02000	Glycolysis / Gluconeogenesis [PATH:ko00010], Starch and sucrose metabolism [PATH:ko00500], Amino sugar and nucleotide sugar metabolism [PATH:ko00520], Phosphotransferase system (PTS) [PATH:ko02060], Biofilm formation - Vibrio cholerae [PATH:ko05111], Biofilm formation - Escherichia coli [PATH:ko02026], Transporters [BR:ko02000],	09101 09131 09145 09183	09100 09130 09140 09180
D|1136176.5.peg.750	1	841743	843467	-	1725	6419	6439	6425	5820	6728	6630	2277	2593	3003	2432	2720	2804	4325.58	4505.5	4535.2	4291.83	4448.54	4328.91	3448.32	3627.06	3947.79	3729.24	3850.16	4198.22	4103.03	0.213277	0.0464857	4.58802	4.47e-06	9.64e-06	Phosphoenolpyruvate-protein phosphotransferase of PTS system (EC 2.7.3.9)	KEGG_ENZYME:2.7.3.9	K08483	ptsI; phosphoenolpyruvate-protein phosphotransferase (PTS system enzyme I) [EC:2.7.3.9]	447	02060 02000	Phosphotransferase system (PTS) [PATH:ko02060], Transporters [BR:ko02000],	09131 09183	09130 09180
D|1136176.5.peg.751	1	843604	843861	-	258	1451	1490	1492	1400	1576	1523	380	474	463	384	442	570	977.787	1042.58	1053.16	1032.4	1042.05	994.408	575.478	663.025	608.666	588.827	625.651	853.419	838.121	0.649993	0.0849321	7.65309	1.96e-14	7.48e-14	Phosphocarrier protein of PTS system	NA	K02784	ptsH; phosphocarrier protein HPr	81	02060 02000	Phosphotransferase system (PTS) [PATH:ko02060], Transporters [BR:ko02000],	09131 09183	09130 09180
D|1136176.5.peg.752	1	844164	845132	-	969	1610	1497	1510	1578	1627	1698	589	711	808	697	781	776	1084.93	1047.48	1065.86	1163.66	1075.77	1108.67	891.991	994.538	1062.21	1068.78	1105.51	1161.85	1069.27	0.0585461	0.0598543	0.978143	0.328004	0.375856	Cysteine synthase (EC 2.5.1.47)	KEGG_ENZYME:2.5.1.47	K01738	cysK; cysteine synthase [EC:2.5.1.47]	259	00920 00270	Sulfur metabolism [PATH:ko00920], Cysteine and methionine metabolism [PATH:ko00270],	09102 09105	09100
D|1136176.5.peg.753	1	845359	846117	-	759	1685	1572	1568	1517	1653	1789	871	1002	959	1083	946	897	1135.47	1099.96	1106.8	1118.68	1092.96	1168.09	1319.06	1401.58	1260.72	1660.68	1339.06	1343.01	1253.84	-0.307604	0.0620256	-4.9593	7.07e-07	1.64e-06	Sulfate transporter%2C CysZ-type	NA	K06203	cysZ; CysZ protein	147	99985	Amino acid metabolism,	09191	09190
D|1136176.5.peg.754	1	846347	847387	+	1041	2034	2003	2094	2014	2292	2228	949	1120	1135	1051	1158	1014	1370.65	1401.54	1478.09	1485.18	1515.47	1454.72	1437.18	1566.64	1492.09	1611.61	1639.15	1518.19	1497.54	-0.0898436	0.0436866	-2.05655	0.0397298	0.0541052	Cell division protein ZipA	NA	K03528	zipA; cell division protein ZipA	72	03036	Chromosome and associated proteins [BR:ko03036],	09182	09180
D|1136176.5.peg.755	1	847480	849492	+	2013	2819	2565	2531	2352	2716	2678	902	842	964	899	926	953	1899.64	1794.78	1786.55	1734.43	1795.81	1748.54	1366	1177.78	1267.29	1378.53	1310.75	1426.86	1557.25	0.441853	0.048539	9.10306	8.78e-20	4.56e-19	DNA ligase (EC 6.5.1.2)	KEGG_ENZYME:6.5.1.2	K01972	E6.5.1.2, ligA, ligB; DNA ligase (NAD+) [EC:6.5.1.2]	465	03030 03410 03420 03430 03032 03400	DNA replication [PATH:ko03030], Base excision repair [PATH:ko03410], Nucleotide excision repair [PATH:ko03420], Mismatch repair [PATH:ko03430], DNA replication proteins [BR:ko03032], DNA repair and recombination proteins [BR:ko03400],	09124 09182	09120 09180
D|1136176.5.peg.756	1	850018	851418	+	1401	1162	1001	981	1028	1077	1104	521	596	536	597	572	519	783.038	700.42	692.457	758.075	712.11	720.831	789.01	833.677	704.633	915.442	809.666	777.06	766.368	-0.144106	0.0621037	-2.32041	0.0203188	0.0289413	N-acetylglucosamine-regulated outer membrane porin	NA			119
D|1136176.5.peg.757	1	851482	851847	+	366	894	973	1013	893	1033	1112	618	640	809	736	607	703	602.441	680.828	715.044	658.523	683.018	726.055	935.909	895.224	1063.52	1128.59	859.208	1052.55	833.409	-0.545316	0.0765051	-7.12783	1.02e-12	3.49e-12	D01200472: hypothetical protein	NA			12
D|1136176.5.peg.758	1	851884	852060	-	177	2978	3076	3325	3148	3459	3199	853	1014	858	1183	979	1037	2006.79	2152.34	2347.01	2321.42	2287.08	2088.71	1291.8	1418.37	1127.94	1814.02	1385.77	1552.62	1816.16	0.620633	0.098498	6.30097	2.96e-10	8.64e-10	D01203783: hypothetical protein	NA			NA
D|1136176.5.peg.759	1	852420	852815	+	396	402	393	382	363	413	412	206	249	310	234	286	196	270.896	274.99	269.642	267.686	273.075	269.006	311.97	348.298	407.53	358.817	404.833	293.456	312.517	-0.389434	0.0784623	-4.96332	6.93e-07	1.61e-06	HTH-type transcriptional regulator cueR	NA	K19591	cueR; MerR family transcriptional regulator, copper efflux regulator	65	03000 01504	Transcription factors [BR:ko03000], Antimicrobial resistance genes [BR:ko01504],	09182 09183	09180
D|1136176.5.peg.760	1	852850	853305	-	456	1762.5	1756.5	1840.5	1710.5	2001	1908.5	702.5	831	943.5	785.5	911	877	1187.36	1228.71	1298.8	1261	1323.06	1245.78	1063.12	1162.39	1239.68	1203.72	1289.52	1313.07	1234.68	0.0528654	0.0540591	0.977919	0.328114	0.37589	Putative activity regulator of membrane protease YbbK	NA	K07340	ybbJ; inner membrane protein	55	99992	Structural proteins,	09193	09190
D|1136176.5.peg.761	1	853309	854238	-	930	5970.5	5645.5	5743.5	5566.5	6249	6105.5	2407.5	2836	2747.5	2599.5	2691	2676	4023.01	3949.92	4053.8	4104.52	4131.83	3986.12	3645.2	3966.96	3611.25	3985.32	3809.11	4006.58	3939.47	0.0750557	0.0344078	2.18136	0.029157	0.0405351	Putative stomatin/prohibitin-family membrane protease subunit YbbK	NA			226
D|1136176.5.peg.762	1	854450	855304	-	855	848	785	788	794	907	866	285	257	362	265	314	304	571.443	549.281	556.224	585.517	599.707	565.435	431.608	359.488	475.89	406.352	444.467	455.157	500.047	0.413056	0.0626914	6.58872	4.44e-11	1.37e-10	D000875: Thioredoxin domain-containing protein EC-YbbN	NA	K05838	ybbN; putative thioredoxin	148	03110	Chaperones and folding catalysts [BR:ko03110],	09182	09180
D|1136176.5.peg.763	1	855701	856528	-	828	3357	2914	2750	2911	2874	3018	1642	1663	1777	1630	1582	1547	2262.19	2038.99	1941.14	2146.65	1900.28	1970.53	2486.67	2326.18	2336.07	2499.45	2239.32	2316.21	2205.31	-0.212171	0.0525342	-4.03871	5.37e-05	0.000104	Putative NAD(P)-dependent oxidoreductase EC-YbbO	NA			167
D|1136176.5.peg.764	1	856572	857486	-	915	27606	24935	24302	24533	25867	26010	14499	14445	13206	14683	11715	12301	18602.9	17447.5	17154	18091.3	17103.2	16982.6	21957.5	20205.5	17360.8	22515	16582.6	18417.4	18535	-0.151314	0.0776177	-1.94948	0.0512376	0.0685432	Cell division inhibitor	NA	K07071	K07071; uncharacterized protein	146	99997	Function unknown,	09194	09190
D|1136176.5.peg.765	1	857784	858518	+	735	2267.5	2021.5	1991	1872.5	2122.5	2167.5	996.5	977	1096	894	1201	875	1527.67	1414.14	1405.38	1380.46	1403.06	1414.89	1508.36	1366.62	1440.82	1370.86	1700.01	1310.07	1436.86	-0.0254674	0.0620133	-0.410677	0.68131	0.723219	Permease of the major facilitator superfamily	NA			163
D|1136176.5.peg.766	1	858515	859309	+	795	1493	1428	1426.5	1399	1565.5	1551.5	727.5	857.5	933.5	701.5	908.5	699.5	1006.09	999.201	1006.57	1031.66	1034.78	1012.69	1100.98	1198.76	1226.54	1074.92	1285.27	1046.56	1085.33	-0.188157	0.0525532	-3.58032	0.000343	0.000613	D01199972: hypothetical protein	NA			215
D|1136176.5.peg.767	1	859299	859649	+	351	923.5	768	837	828.5	922	940.5	341.5	394	395.5	380	480.5	340	621.983	537.385	590.812	610.59	609.625	613.751	516.416	551.122	519.273	582.694	679.44	509.057	578.512	0.0940438	0.07393	1.27207	0.20335	0.243915	Nitrogen regulatory protein P-II	NA			74
D|1136176.5.peg.768	1	859646	860053	+	408	1469	1323.5	1355.5	1474	1547	1499.5	578.5	734.5	760	588.5	800	577.5	989.917	925.73	956.451	1086.97	1022.87	978.738	875.332	1026.71	999.107	901.642	1132.4	863.899	979.981	0.0386009	0.0722961	0.533927	0.593392	0.639843	D01200823: hypothetical protein	NA			71
D|1136176.5.peg.769	1	860101	860646	+	546	1284	1262	1281	1227	1368	1375	658	760	728	593	734	628	865.251	883.047	904.217	904.823	904.519	897.775	996.485	1063.08	957.039	909.309	1038.98	940.258	938.732	-0.140642	0.0444974	-3.16069	0.00157398	0.00258361	D002292: Phosphodiesterase yfcE (EC 3.1.4.-)	KEGG_ENZYME:3.1.4.-	K07095	K07095; uncharacterized protein	108	99997	Function unknown,	09194	09190
D|1136176.5.peg.770	1	860785	861093	-	309	258	251	255	201	233	275	120	184	174	140	164	138	173.859	175.63	179.996	148.223	154.059	179.555	181.73	257.377	228.743	214.677	232.142	206.617	194.384	-0.387792	0.0895506	-4.33043	1.49e-05	3.04e-05	Selenoprotein W-related protein	NA	K07401	K07401; selenoprotein W-related protein	56	99975	Protein processing,	09192	09190
D|1136176.5.peg.771	1	861257	861772	-	516	1612.5	1602.5	1683.5	1587.5	1723.5	1723	830.5	893.5	899.5	773	736	764	1086.28	1120.95	1187.98	1170.3	1139.24	1124.99	1256.96	1249.12	1181.84	1185.32	1041.81	1143.88	1157.39	-0.0476134	0.0493286	-0.965228	0.334431	0.382465	Transmembrane regulatory protein ToxS	NA	K10922	toxS; transmembrane regulatory protein ToxS	25	05111	Biofilm formation - Vibrio cholerae [PATH:ko05111],	09145	09140
D|1136176.5.peg.772	1	861774	862682	-	909	3968.5	3768.5	3884.5	3509.5	4082.5	4105	2005.5	2094.5	2378.5	2171	2012	1916	2673.92	2636.55	2741.59	2587.63	2699.01	2680.27	3036.4	2929.06	3126.15	3329.02	2847.99	2868.68	2846.36	-0.178963	0.0418711	-4.27414	1.92e-05	3.89e-05	Transcriptional activator ToxR	NA			NA
D|1136176.5.peg.773	1	862954	864858	+	1905	1385	1320	1260	1239	1390	1479	464	589	614	519	638	567	933.312	923.631	889.394	913.673	919.066	965.679	702.689	823.886	807.173	795.837	903.089	848.927	868.863	0.183231	0.0538345	3.40359	0.000665	0.00115023	Chaperone protein HtpG	NA	K04079	HSP90A, htpG; molecular chaperone HtpG	486	04141 04151 04217 04621 04612 04659 04657 04915 04914 04626 05200 05215 05132 05418 01009 03110 04131 03051 03029 04147	Protein processing in endoplasmic reticulum [PATH:ko04141], PI3K-Akt signaling pathway [PATH:ko04151], Necroptosis [PATH:ko04217], NOD-like receptor signaling pathway [PATH:ko04621], Antigen processing and presentation [PATH:ko04612], Th17 cell differentiation [PATH:ko04659], IL-17 signaling pathway [PATH:ko04657], Estrogen signaling pathway [PATH:ko04915], Progesterone-mediated oocyte maturation…	09123 09132 09143 09151 09152 09159 09161 09162 09171 09166 09181 09182 09183	09120 09130 09140 09150 09160 09180
D|1136176.5.peg.774	1	864906	865028	+	123	16	19	13	15	14	15	0	6	5	7	10	3	10.7819	13.2947	9.17629	11.0614	9.25678	9.79391	0	8.39272	6.57307	10.7338	14.155	4.49168	8.97594	0.50314	0.331421	1.51813	0.128982	0.162039	hypothetical protein	NA			NA
D|1136176.5.peg.775	1	865247	865891	+	645	187	214	181	187	174	194	174	204	256	168	190	215	126.014	149.74	127.762	137.899	115.048	126.668	263.508	285.353	336.541	257.612	268.945	321.904	209.75	-1.15002	0.0916347	-12.55	3.98e-36	3.84e-35	Adenylate kinase (EC 2.7.4.3)	KEGG_ENZYME:2.7.4.3	K00939	adk, AK; adenylate kinase [EC:2.7.4.3]	177	00230 00730 04147	Purine metabolism [PATH:ko00230], Thiamine metabolism [PATH:ko00730], Exosome [BR:ko04147],	09104 09108 09183	09100 09180
D|1136176.5.peg.776	1	866161	867123	+	963	6914	5712	5370	5934	5521	5835	313	196	158	331	148	193	4659.15	3996.8	3790.51	4375.89	3650.48	3809.83	474.012	274.162	207.709	507.557	209.494	288.965	2187.05	3.63125	0.204284	17.7755	1.09e-70	2.9e-69	Ferrochelatase%2C protoheme ferro-lyase (EC 4.99.1.1)	KEGG_ENZYME:4.99.1.1	K01772	hemH, FECH; protoporphyrin/coproporphyrin ferrochelatase [EC:4.99.1.1 4.99.1.9]	200	00860	Porphyrin and chlorophyll metabolism [PATH:ko00860],	09108	09100
D|1136176.5.peg.777	1	867232	868620	-	1389	567	593	423	407	491	471	373	531	667	333	544	798	382.085	414.934	298.582	300.133	324.648	307.529	564.877	742.756	876.848	510.624	770.032	1194.79	557.319	-1.20051	0.179989	-6.66989	2.56e-11	8.05e-11	Di-/tripeptide transporter	NA	K03305	TC.POT; proton-dependent oligopeptide transporter, POT family	306	99977	Transport,	09193	09190
D|1136176.5.peg.778	1	869123	869629	+	507	404	409	376	303	418	396	306	270	262	232	258	279	272.244	286.186	265.406	223.441	276.381	258.559	463.411	377.673	344.429	355.75	365.199	417.726	325.534	-0.552536	0.0856244	-6.45302	1.1e-10	3.29e-10	Transcriptional activator RfaH	NA	K05785	rfaH; transcriptional antiterminator RfaH	89	03000	Transcription factors [BR:ko03000],	09182	09180
D|1136176.5.peg.779	1	869712	871376	-	1665	980	926	952	876	1078	1036	515	558	581	513	554	510	660.394	647.941	671.986	645.986	712.772	676.432	779.924	780.523	763.791	786.637	784.187	763.585	722.847	-0.213496	0.0435977	-4.89696	9.73e-07	2.23e-06	Asparagine synthetase [glutamine-hydrolyzing] (EC 6.3.5.4)	KEGG_ENZYME:6.3.5.4	K01953	asnB, ASNS; asparagine synthase (glutamine-hydrolysing) [EC:6.3.5.4]	470	00250 01002	Alanine, aspartate and glutamate metabolism [PATH:ko00250], Peptidases and inhibitors [BR:ko01002],	09105 09181	09100 09180
D|1136176.5.peg.780	1	871611	873197	-	1587	96	104	92	74	85	87	34	50	58	28	55	38	64.6916	72.7709	64.9399	54.5696	56.2018	56.8047	51.4901	69.9394	76.2476	42.9353	77.8525	56.8946	62.1115	-0.0306373	0.141467	-0.216568	0.828545	0.852417	putative Glutathione-regulated potassium-efflux system protein KefB	NA			286
D|1136176.5.peg.781	1	873282	874496	-	1215	2082	1977	2005	1805	2177.5	2103.5	1156.5	1051.5	1152.5	1035.5	1101.5	936	1403	1383.35	1415.27	1331.06	1439.43	1373.11	1750.66	1470.13	1514.44	1587.07	1558.47	1401.4	1468.95	-0.152958	0.0513754	-2.97726	0.00290838	0.00461721	N-acetylglucosamine-6P-responsive transcriptional repressor NagC%2C ROK family	NA	K02565	nagC; N-acetylglucosamine repressor	274	03000	Transcription factors [BR:ko03000],	09182	09180
D|1136176.5.peg.782	1	874499	875635	-	1137	1980	1688	1773	1695	1879.5	1918.5	576.5	720.5	731.5	672.5	684.5	555	1334.27	1181.13	1251.5	1249.94	1242.39	1252.31	872.303	1007.13	960.983	1030.45	968.202	830.96	1098.46	0.405338	0.0564384	7.18196	6.87e-13	2.38e-12	N-acetylglucosamine-6-phosphate deacetylase (EC 3.5.1.25)	KEGG_ENZYME:3.5.1.25	K01443	nagA, AMDHD2; N-acetylglucosamine-6-phosphate deacetylase [EC:3.5.1.25]	282	00520	Amino sugar and nucleotide sugar metabolism [PATH:ko00520],	09101	09100
D|1136176.5.peg.783	1	876111	877670	+	1560	8528	7286	7526	7009	7842	8042	1981	2370	2655	1965	2568	2340	5746.77	5098.16	5312.36	5168.63	5185.12	5250.84	3000.06	3315.13	3490.3	3013.14	3635	3503.51	4309.92	0.670092	0.0570326	11.7493	7.12e-32	5.8e-31	PTS system%2C N-acetylglucosamine-specific IIB component (EC 2.7.1.69) / PTS system%2C N-acetylglucosamine-specific IIC component (EC 2.7.1.69)	KEGG_ENZYME:2.7.1.69,KEGG_ENZYME:2.7.1.69	K02804	nagE; N-acetylglucosamine PTS system EIICBA or EIICB component [EC:2.7.1.193]	261	00520 02060 02000	Amino sugar and nucleotide sugar metabolism [PATH:ko00520], Phosphotransferase system (PTS) [PATH:ko02060], Transporters [BR:ko02000],	09101 09131 09183	09100 09130 09180
D|1136176.5.peg.784	1	877973	879640	+	1668	1152	1133	1082	1031	1156	1169	765	802	887	675	874	753	776.3	792.783	763.749	760.288	764.345	763.272	1158.53	1121.83	1166.06	1035.05	1237.15	1127.41	955.563	-0.568003	0.0441784	-12.857	7.85e-38	8.16e-37	Glutaminyl-tRNA synthetase (EC 6.1.1.18)	KEGG_ENZYME:6.1.1.18	K01886	QARS, glnS; glutaminyl-tRNA synthetase [EC:6.1.1.18]	668	00970 01007 03016	Aminoacyl-tRNA biosynthesis [PATH:ko00970], Amino acid related enzymes [BR:ko01007], Transfer RNA biogenesis [BR:ko03016],	09122 09181 09182	09120 09180
D|1136176.5.peg.785	1	879801	880250	-	450	1360	1260	1217	1217	1291	1322	1054	1004	1004	1290	1016	1050	916.465	881.648	859.042	897.449	853.607	863.17	1596.19	1404.38	1319.87	1978.09	1438.15	1572.09	1215.01	-0.819693	0.0866403	-9.46088	3.05e-21	1.69e-20	Ferric uptake regulation protein FUR	NA	K03711	fur, zur, furB; Fur family transcriptional regulator, ferric uptake regulator	125	03000	Transcription factors [BR:ko03000],	09182	09180
D|1136176.5.peg.786	1	880458	880964	+	507	532	574	544	517	578	573	607	618	559	451	516	562	358.5	401.64	383.992	381.25	382.173	374.127	919.25	864.451	734.869	691.565	730.398	841.441	588.638	-1.06727	0.0738812	-14.4458	2.66e-47	3.76e-46	D01200136: hypothetical protein	NA			71
D|1136176.5.peg.787	1	881057	881590	-	534	424	439	404	361	391	436	236	207	309	223	290	272	285.721	307.177	285.171	266.211	258.529	284.676	357.402	289.549	406.216	341.949	410.495	407.245	325.028	-0.391617	0.086888	-4.50714	6.57e-06	1.39e-05	Flavodoxin 1	NA	K03839	fldA, nifF, isiB; flavodoxin I	192	99982	Energy metabolism,	09191	09190
D|1136176.5.peg.788	1	881648	881866	-	219	205	208	189	184	209	217	74	88	95	68	80	76	138.144	145.542	133.409	135.687	138.19	141.685	112.067	123.093	124.888	104.272	113.24	113.789	127	0.265304	0.0893152	2.97042	0.00297388	0.00471314	D01057153: hypothetical protein	NA			54
D|1136176.5.peg.789	1	881975	882751	-	777	160	174	166	150	170	167	50	87	92	80	68	82	107.819	121.751	117.174	110.614	112.404	109.039	75.7208	121.695	120.945	122.672	96.254	122.772	111.572	0.0376688	0.105049	0.358583	0.719907	0.758812	Esterase ybfF (EC 3.1.-.-)	KEGG_ENZYME:3.1.-.-	K01175	ybfF; esterase [EC:3.1.-.-]	124	99980	Enzymes with EC numbers,	09191	09190
D|1136176.5.peg.790	1	882830	883369	+	540	352	335	318	356	356	382	165	204	227	171	202	159	237.203	234.406	224.466	262.524	235.387	249.418	249.879	285.353	298.417	262.212	285.931	238.059	255.271	-0.170011	0.0726496	-2.34016	0.0192757	0.0275655	SeqA protein%2C negative modulator of initiation of replication	NA	K03645	seqA; negative modulator of initiation of replication	105	03032 03036	DNA replication proteins [BR:ko03032], Chromosome and associated proteins [BR:ko03036],	09182	09180
D|1136176.5.peg.791	1	883462	885108	+	1647	807	837	832	749	876	876	626	589	732	463	731	600	543.814	585.666	587.282	552.333	579.21	571.964	948.024	823.886	962.298	709.966	1034.73	898.335	733.126	-0.653435	0.0797519	-8.19335	2.54e-16	1.09e-15	Phosphoglucomutase (EC 5.4.2.2)	KEGG_ENZYME:5.4.2.2	K01835	pgm; phosphoglucomutase [EC:5.4.2.2]	419	00010 00030 00052 00500 00520 00230 00521	Glycolysis / Gluconeogenesis [PATH:ko00010], Pentose phosphate pathway [PATH:ko00030], Galactose metabolism [PATH:ko00052], Starch and sucrose metabolism [PATH:ko00500], Amino sugar and nucleotide sugar metabolism [PATH:ko00520], Purine metabolism [PATH:ko00230], Streptomycin biosynthesis [PATH:ko00521],	09101 09104 09110	09100
D|1136176.5.peg.792	1	885228	885986	-	759	130	128	134	129	137	156	89	95	83	91	94	72	87.6033	89.5642	94.5863	95.1281	90.5842	101.857	134.783	132.885	109.113	139.54	133.057	107.8	109.708	-0.434215	0.097459	-4.45536	8.38e-06	1.76e-05	D00919622: hypothetical protein	NA	K09977	K09977; uncharacterized protein	33	99997	Function unknown,	09194	09190
D|1136176.5.peg.793	1	886110	886868	+	759	293	246	252	258	280	279	210	210	193	177	177	194	197.444	172.131	177.879	190.256	185.136	182.167	318.027	293.745	253.721	271.413	250.543	290.462	231.91	-0.600323	0.074788	-8.027	9.99e-16	4.14e-15	D137478: Hypothetical protein YbgI	NA			226
D|1136176.5.peg.794	1	887036	888325	-	1290	1227	1319	1240	1177	1360	1397	942	1140	1293	722	1185	993	826.84	922.932	875.276	867.952	899.23	912.139	1426.58	1594.62	1699.8	1107.12	1677.37	1486.75	1191.38	-0.762135	0.0918092	-8.30129	1.03e-16	4.5e-16	Citrate synthase (si) (EC 2.3.3.1)	KEGG_ENZYME:2.3.3.1	K01647	CS, gltA; citrate synthase [EC:2.3.3.1]	536	00020 00630	Citrate cycle (TCA cycle) [PATH:ko00020], Glyoxylate and dicarboxylate metabolism [PATH:ko00630],	09101	09100
D|1136176.5.peg.795	1	888923	889135	+	213	121	113	115	90.5	125	133.5	48	57.5	69.5	36.5	77	56.5	81.5384	79.0684	81.1748	66.3685	82.6498	86.8393	72.6919	79.7309	90.7084	55.2026	108.993	83.8446	80.7343	-0.0443402	0.12818	-0.34592	0.729403	0.766462	Succinate dehydrogenase cytochrome b-556 subunit	NA	K00241	sdhC, frdC; succinate dehydrogenase / fumarate reductase, cytochrome b subunit	27	00020 00650 00190 00720	Citrate cycle (TCA cycle) [PATH:ko00020], Butanoate metabolism [PATH:ko00650], Oxidative phosphorylation [PATH:ko00190], Carbon fixation pathways in prokaryotes [PATH:ko00720],	09101 09102	09100
D|1136176.5.peg.796	1	889129	889476	+	348	163.5	157.5	132	148.5	158.5	176	55.5	76	63	41.5	75.5	73.5	109.841	109.856	93.1746	109.139	104.469	114.915	83.2928	106.308	82.8207	62.8696	106.162	109.297	99.3455	0.217949	0.115607	1.88526	0.0593954	0.0785061	Succinate dehydrogenase hydrophobic membrane anchor protein	NA	K00242	sdhD, frdD; succinate dehydrogenase / fumarate reductase, membrane anchor subunit	72	00020 00650 00190 00720	Citrate cycle (TCA cycle) [PATH:ko00020], Butanoate metabolism [PATH:ko00650], Oxidative phosphorylation [PATH:ko00190], Carbon fixation pathways in prokaryotes [PATH:ko00720],	09101 09102	09100
D|1136176.5.peg.797	1	889477	891243	+	1767	1639	1455.5	1569.5	1535	1708.5	1647	691	838.5	848	706.5	854	721.5	1104.48	1018.09	1107.51	1131.95	1129.33	1075.37	1046.46	1172.18	1114.79	1082.58	1208.84	1079.5	1105.92	-0.0307814	0.0470911	-0.653657	0.513333	0.562003	Succinate dehydrogenase flavoprotein subunit (EC 1.3.99.1)	KEGG_ENZYME:1.3.99.1	K00239	sdhA, frdA; succinate dehydrogenase / fumarate reductase, flavoprotein subunit [EC:1.3.5.1 1.3.5.4]	503	00020 00650 00190 00720 05134	Citrate cycle (TCA cycle) [PATH:ko00020], Butanoate metabolism [PATH:ko00650], Oxidative phosphorylation [PATH:ko00190], Carbon fixation pathways in prokaryotes [PATH:ko00720], Legionellosis [PATH:ko05134],	09101 09102 09171	09100 09160
D|1136176.5.peg.798	1	891256	891969	+	714	770.5	786	727.5	659	772	764.5	436.5	486	422.5	389.5	447.5	385.5	518.881	549.98	513.166	485.965	510.445	498.836	660.285	679.811	554.767	596.494	632.728	576.432	564.816	-0.265533	0.0594372	-4.46746	7.92e-06	1.67e-05	Succinate dehydrogenase iron-sulfur protein (EC 1.3.99.1)	KEGG_ENZYME:1.3.99.1	K00240	sdhB, frdB; succinate dehydrogenase / fumarate reductase, iron-sulfur subunit [EC:1.3.5.1 1.3.5.4]	209	00020 00650 00190 00720	Citrate cycle (TCA cycle) [PATH:ko00020], Butanoate metabolism [PATH:ko00650], Oxidative phosphorylation [PATH:ko00190], Carbon fixation pathways in prokaryotes [PATH:ko00720],	09101 09102	09100
D|1136176.5.peg.799	1	892067	894886	+	2820	1730	1709.5	1542.5	1540	1742	1782	774	871	987	665.5	925	814	1165.8	1195.82	1088.45	1135.64	1151.81	1163.52	1172.16	1218.34	1297.52	1019.71	1309.34	1218.74	1178.07	-0.0693449	0.0580308	-1.19497	0.2321	0.274849	2-oxoglutarate dehydrogenase E1 component (EC 1.2.4.2)	KEGG_ENZYME:1.2.4.2	K00164	OGDH, sucA; 2-oxoglutarate dehydrogenase E1 component [EC:1.2.4.2]	777	00020	Citrate cycle (TCA cycle) [PATH:ko00020],	09101	09100
D|1136176.5.peg.800	1	894908	896116	+	1209	923	904.5	809.5	820	897	876	349	444	476	339.5	454	388	621.983	632.547	571.047	604.69	593.095	571.964	528.531	621.062	625.756	519.824	642.637	580.924	592.838	0.0288407	0.0619636	0.465445	0.641613	0.686576	Dihydrolipoamide succinyltransferase component (E2) of 2-oxoglutarate dehydrogenase complex (EC 2.3.1.61)	KEGG_ENZYME:2.3.1.61	K00658	DLST, sucB; 2-oxoglutarate dehydrogenase E2 component (dihydrolipoamide succinyltransferase) [EC:2.3.1.61]	363	00020 00310 00380	Citrate cycle (TCA cycle) [PATH:ko00020], Lysine degradation [PATH:ko00310], Tryptophan metabolism [PATH:ko00380],	09101 09105	09100
D|1136176.5.peg.801	1	896323	897489	+	1167	921.5	872	843	819	867.5	891	281	308.5	318	255.5	330.5	286.5	620.635	610.156	595.047	603.953	573.259	581.758	425.551	430.827	418.047	391.018	467.115	428.207	512.131	0.484185	0.0527108	9.18568	4.09e-20	2.15e-19	Succinyl-CoA ligase [ADP-forming] beta chain (EC 6.2.1.5)	KEGG_ENZYME:6.2.1.5	K01903	sucC; succinyl-CoA synthetase beta subunit [EC:6.2.1.5]	317	00020 00640 00660 00720	Citrate cycle (TCA cycle) [PATH:ko00020], Propanoate metabolism [PATH:ko00640], C5-Branched dibasic acid metabolism [PATH:ko00660], Carbon fixation pathways in prokaryotes [PATH:ko00720],	09101 09102	09100
D|1136176.5.peg.802	1	897489	898361	+	873	577.5	539	558	477	550.5	541	219	198.5	253	185.5	207.5	212.5	388.824	377.149	393.874	351.753	363.659	353.234	331.657	276.96	332.597	283.68	293.008	317.412	338.651	0.279495	0.0660593	4.23097	2.33e-05	4.69e-05	Succinyl-CoA ligase [ADP-forming] alpha chain (EC 6.2.1.5)	KEGG_ENZYME:6.2.1.5	K01902	sucD; succinyl-CoA synthetase alpha subunit [EC:6.2.1.5]	264	00020 00640 00660 00720	Citrate cycle (TCA cycle) [PATH:ko00020], Propanoate metabolism [PATH:ko00640], C5-Branched dibasic acid metabolism [PATH:ko00660], Carbon fixation pathways in prokaryotes [PATH:ko00720],	09101 09102	09100
D|1136176.5.peg.803	1	898493	899278	-	786	195.5	187	192.5	170.5	172	203.5	95	102	115	101	122.5	127	131.405	130.848	135.527	125.363	113.726	132.544	143.869	142.676	151.181	154.874	172.691	190.148	143.738	-0.311568	0.090388	-3.44701	0.000567	0.000988	Zinc ABC transporter%2C inner membrane permease protein ZnuB	NA	K09816	znuB; zinc transport system permease protein	214	02010 02000	ABC transporters [PATH:ko02010], Transporters [BR:ko02000],	09131 09183	09130 09180
D|1136176.5.peg.804	1	899278	900060	-	783	1072.5	1039	1071.5	1034.5	1107	1160.5	768	906	838	685	775.5	727	722.39	727.01	755.985	762.5	731.946	757.395	1163.07	1267.3	1101.65	1050.38	1097.01	1088.48	935.427	-0.603133	0.0492582	-12.2443	1.8e-34	1.64e-33	Zinc ABC transporter%2C ATP-binding protein ZnuC	NA	K09817	znuC; zinc transport system ATP-binding protein [EC:7.2.2.20]	142	02010 02000	ABC transporters [PATH:ko02010], Transporters [BR:ko02000],	09131 09183	09130 09180
D|1136176.5.peg.805	1	900144	901028	+	885	469	499	502	469	476	548	360	350	340	221	296	426	316.046	349.161	354.346	345.853	314.73	357.804	545.189	489.576	446.969	338.882	418.988	637.818	409.614	-0.497484	0.122917	-4.04731	5.18e-05	0.000101	Zinc ABC transporter%2C periplasmic-binding protein ZnuA	NA	K09815	znuA; zinc transport system substrate-binding protein	153	02010 02000	ABC transporters [PATH:ko02010], Transporters [BR:ko02000],	09131 09183	09130 09180
D|1136176.5.peg.806	1	901277	904660	+	3384	5001	4641	4492	4380	4949	5075	2931	3168	3098	3007	2848	2530	3370.03	3247.4	3170.76	3229.93	3272.27	3313.6	4438.75	4431.36	4072.68	4610.95	4031.34	3787.98	3748.09	-0.371945	0.0494194	-7.5263	5.22e-14	1.93e-13	DNA-binding response regulator%2C AraC family	NA			NA
D|1136176.5.peg.807	1	905289	905510	+	222	120	111	122	122	126.5	107.5	116.5	159	179.5	119.5	173	163.5	80.8646	77.669	86.1159	89.9661	83.311	69.8632	175.672	222.407	235.316	182.475	244.881	244.048	149.382	-1.42388	0.105986	-13.4346	3.79e-41	4.34e-40	Ferrous iron transport protein A	NA	K04758	feoA; ferrous iron transport protein A	27	02000	Transporters [BR:ko02000],	09183	09180
D|1136176.5.peg.808	1	905511	907784	+	2274	748.5	719	674.5	669	727.5	789	589.5	864	1328.5	501.5	1059	1297	504.056	503.099	475.755	493.339	480.691	515.159	891.991	1208.55	1745.81	768.236	1499.01	1941.9	918.967	-1.43873	0.191701	-7.50509	6.14e-14	2.26e-13	Ferrous iron transport protein B	NA	K04759	feoB; ferrous iron transport protein B	465	02000	Transporters [BR:ko02000],	09183	09180
D|1136176.5.peg.809	1	907781	908011	+	231	16.5	14	23.5	15	20	17.5	11	26	40	15	40	35.5	10.7819	9.79609	16.235	11.0614	13.224	11.0998	16.6586	36.3685	52.5846	23.0011	56.62	52.4029	25.8195	-1.72602	0.272331	-6.33796	2.33e-10	6.87e-10	Ferrous iron transport protein C	NA			NA
D|1136176.5.peg.810	1	908144	908572	-	429	142	175	154	142	155	193	116	132	134	153	136	126	95.6897	122.451	108.704	104.715	102.486	126.015	175.672	184.64	176.158	234.611	192.508	188.65	151.025	-0.801161	0.0986044	-8.12501	4.47e-16	1.89e-15	Diadenosine tetraphosphate (Ap4A) hydrolase and other HIT family hydrolases	NA			86
D|1136176.5.peg.811	1	908842	910614	-	1773	766	805	754	685	832	804	495	522	505	444	497	500	516.185	563.275	532.225	505.138	550.117	524.953	749.636	730.167	663.88	680.832	703.503	748.613	622.377	-0.420915	0.050482	-8.33792	7.56e-17	3.35e-16	Arginyl-tRNA synthetase (EC 6.1.1.19)	KEGG_ENZYME:6.1.1.19	K01887	RARS, argS; arginyl-tRNA synthetase [EC:6.1.1.19]	450	00970 01007 03016 03029	Aminoacyl-tRNA biosynthesis [PATH:ko00970], Amino acid related enzymes [BR:ko01007], Transfer RNA biogenesis [BR:ko03016], Mitochondrial biogenesis [BR:ko03029],	09122 09181 09182	09120 09180
D|1136176.5.peg.812	1	910924	911529	+	606	107	107	93	93	116	127	51	65	70	47	41	40	72.1042	74.8701	65.6457	68.5807	76.699	82.9217	77.2352	90.9212	92.023	72.07	58.0355	59.889	74.2496	-0.0337317	0.125259	-0.269295	0.787703	0.818379	Protein yecM	NA	K09907	K09907; uncharacterized protein	107	99997	Function unknown,	09194	09190
D|1136176.5.peg.813	1	911644	912483	-	840	99	115	131	121	115	132	62	96	121	89	88	78	66.7133	80.4679	92.4687	89.2287	76.0378	86.1864	93.8937	134.284	159.068	136.473	124.564	116.784	104.681	-0.645121	0.122162	-5.28088	1.29e-07	3.17e-07	Formyltetrahydrofolate deformylase (EC 3.5.1.10)	KEGG_ENZYME:3.5.1.10	K01433	purU; formyltetrahydrofolate deformylase [EC:3.5.1.10]	217	00630 00670	Glyoxylate and dicarboxylate metabolism [PATH:ko00630], One carbon pool by folate [PATH:ko00670],	09101 09108	09100
D|1136176.5.peg.814	1	912759	912959	+	201	854	892	895	687	927	979	508	554	663	645	591	562	575.486	624.151	631.752	506.613	612.931	639.216	769.323	774.928	871.589	989.046	836.56	841.441	722.753	-0.500914	0.0767726	-6.52465	6.82e-11	2.08e-10	D01200733: hypothetical protein	NA			4
D|1136176.5.peg.815	1	913120	915048	+	1929	431	376	384	371	398	419	198	213	231	168	195	196	290.439	263.095	271.053	273.586	263.157	273.576	299.854	297.942	303.676	257.612	276.022	293.456	280.289	-0.0817994	0.0643795	-1.27058	0.203878	0.244421	DinG family ATP-dependent helicase YoaA	NA	K03722	dinG; ATP-dependent DNA helicase DinG [EC:3.6.4.12]	466	03400	DNA repair and recombination proteins [BR:ko03400],	09182	09180
D|1136176.5.peg.816	1	915108	915809	+	702	404	371	382	378	421	428	238	272	279	192	308	216	272.244	259.596	269.642	278.748	278.364	279.453	360.431	380.47	366.777	294.414	435.974	323.401	316.626	-0.402051	0.0805984	-4.98832	6.09e-07	1.42e-06	TsaB protein%2C required for threonylcarbamoyladenosine (t(6)A) formation in tRNA	NA	K14742	tsaB; tRNA threonylcarbamoyladenosine biosynthesis protein TsaB	138	03016	Transfer RNA biogenesis [BR:ko03016],	09182	09180
D|1136176.5.peg.817	1	915915	916220	+	306	122	94	102	84	118	122	105	96	102	91	91	91	82.2123	65.7737	71.9986	61.9439	78.0214	79.6571	159.014	134.284	134.091	139.54	128.81	136.248	105.966	-0.914876	0.102075	-8.96276	3.17e-19	1.59e-18	UPF0325 protein YaeH	NA			17
D|1136176.5.peg.818	1	916260	916820	+	561	1686	1665	1499	1466	1589	1608	568	654	741	639	705	723	1136.15	1165.03	1058.1	1081.07	1050.64	1049.91	860.188	914.807	974.129	979.845	997.927	1082.49	1029.19	0.171037	0.0566863	3.01726	0.00255071	0.00408544	Starvation lipoprotein Slp paralog	NA	K07285	slp; outer membrane lipoprotein	54	99992	Structural proteins,	09193	09190
D|1136176.5.peg.819	1	916874	917725	+	852	297	328	250	223	316	291	137	157	200	182	174	217	200.14	229.508	176.467	164.446	208.939	190.002	207.475	219.61	262.923	279.08	246.297	324.898	225.815	-0.396096	0.114443	-3.46109	0.000538	0.000941	Predicted hydrolase/acyltransferase	NA			83
D|1136176.5.peg.820	1	917831	919525	+	1695	2063	2150	2031	1787	2180	2166	1357	1373	1519	1041	1557	1378	1390.2	1504.4	1433.62	1317.78	1441.41	1414.24	2055.06	1920.54	1996.9	1596.27	2203.93	2063.18	1694.79	-0.477547	0.0702452	-6.79828	1.06e-11	3.4e-11	Long-chain-fatty-acid--CoA ligase (EC 6.2.1.3)	KEGG_ENZYME:6.2.1.3	K01897	ACSL, fadD; long-chain acyl-CoA synthetase [EC:6.2.1.3]	453	00061 00071 04146 04216 02024 04920 03320 04714 01004 04147	Fatty acid biosynthesis [PATH:ko00061], Fatty acid degradation [PATH:ko00071], Peroxisome [PATH:ko04146], Ferroptosis [PATH:ko04216], Quorum sensing [PATH:ko02024], Adipocytokine signaling pathway [PATH:ko04920], PPAR signaling pathway [PATH:ko03320], Thermogenesis [PATH:ko04714], Lipid biosynthesis proteins [BR:ko01004], Exosome [BR:ko04147],	09103 09141 09143 09145 09152 09159 09181 09183	09100 09140 09150 09180
D|1136176.5.peg.821	1	919595	920788	+	1194	997	975	900	920	1010	996	462	483	483	453	504	420	671.85	682.228	635.281	678.433	667.81	650.315	699.66	675.614	634.959	694.632	713.412	628.835	669.419	-0.0213742	0.0471949	-0.452891	0.650627	0.694301	Ribonuclease D (EC 3.1.26.3)	KEGG_ENZYME:3.1.26.3	K03684	rnd; ribonuclease D [EC:3.1.13.5]	232	03016	Transfer RNA biogenesis [BR:ko03016],	09182	09180
D|1136176.5.peg.822	1	920902	921165	-	264	1004.5	962	947	1014	1037	1041.5	321	296	346.5	368	354	350	676.567	673.131	668.457	747.751	685.663	679.697	486.127	414.041	454.857	564.293	501.087	524.029	589.642	0.490429	0.0676541	7.24906	4.2e-13	1.47e-12	Cell division topological specificity factor MinE	NA	K03608	minE; cell division topological specificity factor	62	03036 04812	Chromosome and associated proteins [BR:ko03036], Cytoskeleton proteins [BR:ko04812],	09182 09183	09180
D|1136176.5.peg.823	1	921172	921984	-	813	457.5	456	428	394	456	422.5	169	182	200	156	191	138	307.959	319.073	302.112	290.546	301.506	275.535	255.936	254.579	262.923	239.211	270.36	206.617	273.863	0.267904	0.0717877	3.7319	0.00019	0.000349	Septum site-determining protein MinD	NA	K03609	minD; septum site-determining protein MinD	225	03036 04812	Chromosome and associated proteins [BR:ko03036], Cytoskeleton proteins [BR:ko04812],	09182 09183	09180
D|1136176.5.peg.824	1	922006	922668	-	663	147	144	135	113	136	139	73	122	105.5	74	98	95	99.0591	100.76	95.2922	83.3293	89.923	90.7569	110.552	170.652	138.035	113.472	138.719	142.236	114.399	-0.544671	0.106204	-5.12855	2.92e-07	6.99e-07	Septum site-determining protein MinC	NA	K03610	minC; septum site-determining protein MinC	120	03036 04812	Chromosome and associated proteins [BR:ko03036], Cytoskeleton proteins [BR:ko04812],	09182 09183	09180
D|1136176.5.peg.825	1	922890	923180	+	291	343	316.5	287.5	272	323	330	126	151	167	150	156	141	231.138	221.112	202.584	200.58	213.567	215.466	190.816	211.217	219.541	230.011	220.818	211.109	213.997	0.00130941	0.0732517	0.0178755	0.985738	0.987866	Protein YcgL	NA	K09902	K09902; uncharacterized protein	57	99997	Function unknown,	09194	09190
D|1136176.5.peg.826	1	923211	924209	+	999	767	710.5	773.5	748	751	756	243	294	302	326	321	307	516.859	496.802	545.636	551.596	496.56	493.613	368.003	411.243	397.014	499.89	454.375	459.648	474.27	0.260464	0.0718352	3.62585	0.000288	0.000519	Membrane-bound lytic murein transglycosylase B (EC 3.2.1.-)	KEGG_ENZYME:3.2.1.-	K08305	mltB; membrane-bound lytic murein transglycosylase B [EC:4.2.2.-]	192	01011	Peptidoglycan biosynthesis and degradation proteins [BR:ko01011],	09181	09180
D|1136176.5.peg.827	1	924331	925275	+	945	254	262	259	248	306	271	112	101	134	127	115	115	171.163	183.327	182.82	182.882	202.327	176.943	169.614	141.278	176.158	194.742	162.782	172.181	176.351	0.114915	0.0833536	1.37865	0.168004	0.205392	Transcriptional regulator%2C LysR family	NA			149
D|1136176.5.peg.828	1	925481	926680	+	1200	69	71	61	76	69	73	29	39	20	27	22	19	46.4971	49.6802	43.058	56.0445	45.6227	47.6637	43.918	54.5527	26.2923	41.4019	31.141	28.4473	42.8599	0.356773	0.16104	2.21543	0.0267306	0.0373183	Na+ dependent nucleoside transporter NupC	NA	K03317	TC.CNT; concentrative nucleoside transporter, CNT family	243	99977	Transport,	09193	09190
D|1136176.5.peg.829	1	926866	928680	+	1815	2318	2236	2325	2227	2489	2515	893	1013	1111	917	1059	994	1562.03	1564.58	1641.14	1642.25	1645.72	1642.11	1352.37	1416.97	1460.54	1406.13	1499.01	1488.24	1526.76	0.168904	0.0366816	4.6046	4.13e-06	8.92e-06	Sodium/hydrogen exchanger family protein	NA			360
D|1136176.5.peg.830	1	928796	929653	-	858	134	151	129	131	136	154	61	89	114	84	102	82	90.2988	105.658	91.057	96.603	89.923	100.551	92.3793	124.492	149.866	128.806	144.381	122.772	111.399	-0.414901	0.106082	-3.91112	9.19e-05	0.000174	Methylenetetrahydrofolate dehydrogenase (NADP+) (EC 1.5.1.5) / Methenyltetrahydrofolate cyclohydrolase (EC 3.5.4.9)	KEGG_ENZYME:1.5.1.5,KEGG_ENZYME:3.5.4.9	K01491	folD; methylenetetrahydrofolate dehydrogenase (NADP+) / methenyltetrahydrofolate cyclohydrolase [EC:1.5.1.5 3.5.4.9]	231	00720 00670	Carbon fixation pathways in prokaryotes [PATH:ko00720], One carbon pool by folate [PATH:ko00670],	09102 09108	09100
D|1136176.5.peg.831	1	930209	931294	+	1086	1237	1141	1181	1141	1268	1212	849	804	804	780	808	773	833.579	798.381	833.63	841.405	838.399	791.348	1285.74	1124.63	1056.95	1196.06	1143.72	1157.36	991.766	-0.495235	0.0485983	-10.1904	2.19e-24	1.36e-23	Chorismate synthase (EC 4.2.3.5)	KEGG_ENZYME:4.2.3.5	K01736	aroC; chorismate synthase [EC:4.2.3.5]	292	00400	Phenylalanine, tyrosine and tryptophan biosynthesis [PATH:ko00400],	09105	09100
D|1136176.5.peg.832	1	931422	932045	-	624	39	47	54	49	53	45	18	20	28	22	27	13	26.281	32.8869	38.1169	36.1339	35.0435	29.3817	27.2595	27.9757	36.8092	33.7349	38.2185	19.4639	31.7755	0.0994775	0.176818	0.562599	0.573708	0.620926	D00919565: hypothetical protein	NA			122
D|1136176.5.peg.833	1	932313	932876	+	564	417	400	455	358	463	459	225.5	309	274.5	262	264.5	234	281.004	279.888	321.17	263.999	306.135	299.694	340.743	432.225	360.204	401.752	373.692	350.351	334.238	-0.366548	0.0743553	-4.92968	8.24e-07	1.9e-06	Putative transporting ATPase	NA	K09906	epmC; elongation factor P hydroxylase [EC:1.14.-.-]	134	03012	Translation factors [BR:ko03012],	09182	09180
D|1136176.5.peg.834	1	932886	933149	+	264	80	88	84	93	89	115	43.5	24	51.5	38	61.5	33	53.9097	61.5754	59.2929	68.5807	58.8466	75.0866	65.1199	33.5709	67.0453	58.2694	86.3455	49.4084	61.421	0.0674144	0.165258	0.407935	0.683322	0.724858	D01199766: hypothetical protein	NA			56
D|1136176.5.peg.835	1	933324	933845	+	522	93	89	88	88	97	101	32	38	30	35	44	36	62.67	62.2751	62.1164	64.8936	64.1362	65.9456	48.4613	53.1539	39.4384	53.6692	62.282	53.9001	57.7452	0.301347	0.129538	2.32632	0.0200012	0.0285416	D01199557: hypothetical protein	NA	K19784	chrR, NQR; chromate reductase, NAD(P)H dehydrogenase (quinone)	56	99988	Secondary metabolism,	09191	09190
D|1136176.5.peg.836	1	933994	936084	-	2091	598	579	568	522	613	650	307	296	297	220	292	223	402.975	405.138	400.933	384.937	405.315	424.403	464.925	414.041	390.44	337.349	413.326	333.881	398.139	0.0417532	0.074732	0.558705	0.576363	0.623218	tRNA (5-methylaminomethyl-2-thiouridylate)-methyltransferase (EC 2.1.1.61)	KEGG_ENZYME:2.1.1.61	K15461	mnmC; tRNA 5-methylaminomethyl-2-thiouridine biosynthesis bifunctional protein [EC:2.1.1.61 1.5.-.-]	339	03016	Transfer RNA biogenesis [BR:ko03016],	09182	09180
D|1136176.5.peg.837	1	936201	937412	+	1212	2134	2168	2107	2048	2240	2345	1151	1240	1270	1220	1259	1132	1438.04	1516.99	1487.26	1510.25	1481.08	1531.11	1743.09	1734.5	1669.56	1870.75	1782.11	1694.86	1621.64	-0.226718	0.035997	-6.29824	3.01e-10	8.78e-10	3-oxoacyl-[acyl-carrier-protein] synthase%2C KASI (EC 2.3.1.41)	KEGG_ENZYME:2.3.1.41	K00647	fabB; 3-oxoacyl-[acyl-carrier-protein] synthase I [EC:2.3.1.41]	344	00061 00780 01004	Fatty acid biosynthesis [PATH:ko00061], Biotin metabolism [PATH:ko00780], Lipid biosynthesis proteins [BR:ko01004],	09103 09108 09181	09100 09180
D|1136176.5.peg.838	1	937943	939076	+	1134	652	652.5	665	619	718.5	677.5	223.5	251	258	228.5	234	249	439.364	456.218	469.402	456.468	474.74	442.032	337.715	351.096	339.17	349.616	331.227	372.809	401.655	0.396129	0.0557976	7.09938	1.25e-12	4.25e-12	Erythronate-4-phosphate dehydrogenase (EC 1.1.1.290)	KEGG_ENZYME:1.1.1.290	K03473	pdxB; erythronate-4-phosphate dehydrogenase [EC:1.1.1.290]	221	00750	Vitamin B6 metabolism [PATH:ko00750],	09108	09100
D|1136176.5.peg.839	1	939089	940102	+	1014	1338	1336.5	1336	1226	1356.5	1416.5	572.5	594	746	652.5	699	687	901.64	934.827	943.04	904.086	896.585	924.545	866.245	830.88	980.702	999.78	989.434	1028.59	933.363	-0.0490622	0.0549532	-0.8928	0.371964	0.420316	Aspartate-semialdehyde dehydrogenase (EC 1.2.1.11)	KEGG_ENZYME:1.2.1.11	K00133	asd; aspartate-semialdehyde dehydrogenase [EC:1.2.1.11]	228	00260 00270 00300 00261	Glycine, serine and threonine metabolism [PATH:ko00260], Cysteine and methionine metabolism [PATH:ko00270], Lysine biosynthesis [PATH:ko00300], Monobactam biosynthesis [PATH:ko00261],	09105 09110	09100
D|1136176.5.peg.840	1	940310	945274	+	4965	6156	5443	5790	5905	6147	6318	1295	1455	1454	1332	1403	1292	4148.35	3808.58	4086.98	4354.51	4064.39	4125.19	1961.17	2035.24	1911.45	2042.49	1985.95	1934.42	3038.23	1.05069	0.038912	27.0017	1.41e-160	1.82e-158	Beta-glucosidase (EC 3.2.1.21)	KEGG_ENZYME:3.2.1.21			NA
D|1136176.5.peg.841	1	945420	946214	+	795	493	483	492	459	511	521	217	230	286	215	230	203	332.219	337.965	347.287	338.479	337.872	340.175	328.628	321.721	375.98	329.682	325.565	303.937	334.959	0.0321883	0.0599485	0.536932	0.591314	0.637848	tRNA pseudouridine synthase A (EC 4.2.1.70)	KEGG_ENZYME:4.2.1.70	K06173	truA, PUS1; tRNA pseudouridine38-40 synthase [EC:5.4.99.12]	247	03016	Transfer RNA biogenesis [BR:ko03016],	09182	09180
D|1136176.5.peg.842	1	946391	947317	+	927	2617	2609	2560	2324	2629	2839	1245	1446	1533	1046	1506	1255	1763.52	1825.57	1807.02	1713.78	1738.29	1853.66	1885.45	2022.65	2015.3	1603.94	2131.74	1879.02	1853.33	-0.109131	0.0619839	-1.76063	0.0783008	0.1015	Acetyl-coenzyme A carboxyl transferase beta chain (EC 6.4.1.2)	KEGG_ENZYME:6.4.1.2	K01963	accD; acetyl-CoA carboxylase carboxyl transferase subunit beta [EC:6.4.1.2 2.1.3.15]	232	00620 00640 00720 00061	Pyruvate metabolism [PATH:ko00620], Propanoate metabolism [PATH:ko00640], Carbon fixation pathways in prokaryotes [PATH:ko00720], Fatty acid biosynthesis [PATH:ko00061],	09101 09102 09103	09100
D|1136176.5.peg.843	1	947360	948622	+	1263	335	371	336.5	287	383.5	357	191	198.5	203.5	168.5	220	191	225.747	259.596	237.172	211.642	253.239	233.095	289.253	276.96	266.867	257.612	311.41	285.97	259.047	-0.248275	0.0736886	-3.36925	0.000754	0.00129587	Dihydrofolate synthase (EC 6.3.2.12) @ Folylpolyglutamate synthase (EC 6.3.2.17)	KEGG_ENZYME:6.3.2.12,KEGG_ENZYME:6.3.2.17	K11754	folC; dihydrofolate synthase / folylpolyglutamate synthase [EC:6.3.2.12 6.3.2.17]	236	00790	Folate biosynthesis [PATH:ko00790],	09108	09100
D|1136176.5.peg.844	1	948623	949198	+	576	256	225	239.5	252	282.5	228	121	156.5	151.5	136.5	167	134	172.511	157.437	168.702	185.832	186.458	148.867	183.244	218.211	198.507	208.543	236.388	200.628	188.777	-0.290156	0.0862686	-3.3634	0.00077	0.00132312	DedD protein	NA	K03749	dedD; DedD protein	74	99996	General function prediction only,	09194	09190
D|1136176.5.peg.845	1	949260	949751	+	492	203	197	196	162	194	210	72	89	94	74	103	74	136.796	137.845	138.35	119.463	128.272	137.115	109.038	124.492	123.574	113.472	145.796	110.795	127.084	0.131348	0.0931047	1.41075	0.158317	0.194472	Colicin V production protein	NA	K03558	cvpA; membrane protein required for colicin V production	114	99996	General function prediction only,	09194	09190
D|1136176.5.peg.846	1	949785	951299	+	1515	716	705	660	631	693	759	380	376	399	283	404	469	482.492	493.303	465.873	465.317	458.21	495.572	575.478	525.944	524.531	433.953	571.862	702.199	516.228	-0.220549	0.0904246	-2.43904	0.0147263	0.0214495	Amidophosphoribosyltransferase (EC 2.4.2.14)	KEGG_ENZYME:2.4.2.14	K00764	purF, PPAT; amidophosphoribosyltransferase [EC:2.4.2.14]	402	00230 00250 01002	Purine metabolism [PATH:ko00230], Alanine, aspartate and glutamate metabolism [PATH:ko00250], Peptidases and inhibitors [BR:ko01002],	09104 09105 09181	09100 09180
D|1136176.5.peg.847	1	951498	952373	-	876	5750	5670	5458	5159	5938	6103	3911	4004	4471	4246	4307	3916	3874.76	3967.42	3852.63	3804.39	3926.2	3984.81	5922.88	5600.74	5877.64	6510.84	6096.56	5863.14	4940.17	-0.615431	0.0369882	-16.6386	3.66e-62	7.59e-61	Cyn operon transcriptional activator	NA	K10918	aphB; LysR family transcriptional regulator, transcriptional activator AphB	147	05111 03000	Biofilm formation - Vibrio cholerae [PATH:ko05111], Transcription factors [BR:ko03000],	09145 09182	09140 09180
D|1136176.5.peg.848	1	952602	953705	+	1104	107028	98979	101273	95412	111666	108046	58346	59531	61510	68239	57533	56329	72123.1	69257.6	71485.4	70359.4	73833.4	70546.2	88360.1	83271.2	80861.9	104638	81437.9	84337.2	79209.3	-0.290258	0.0623885	-4.65243	3.28e-06	7.12e-06	Response regulator	NA	K02485	rssB, hnr; two-component system, response regulator	25	02022	Two-component system [BR:ko02022],	09183	09180
D|1136176.5.peg.849	1	953854	953991	+	138	528	512	543	403	542	579	289	381	400	353	349	330	355.804	358.257	383.286	297.183	358.369	378.045	437.666	532.938	525.846	541.292	494.009	494.084	429.732	-0.505681	0.074327	-6.80346	1.02e-11	3.29e-11	D01201193: hypothetical protein	NA			16
D|1136176.5.peg.850	1	954162	954437	+	276	137	136	131	108	138	134	78	101	129	93	90	89	92.3204	95.162	92.4687	79.6422	91.2454	87.4922	118.124	141.278	169.585	142.607	127.395	133.253	114.214	-0.631971	0.0992761	-6.36579	1.94e-10	5.75e-10	D039061: hypothetical protein related to heme utilization	NA	K09790	K09790; uncharacterized protein	23	99997	Function unknown,	09194	09190
D|1136176.5.peg.851	1	954601	955146	+	546	1377.5	1322	1242.5	1171	1333.5	1283	448.5	477.5	581.5	509.5	528	502	927.921	925.031	876.688	863.528	881.377	837.705	678.458	667.222	763.791	780.503	747.384	751.607	808.435	0.275381	0.051762	5.32014	1.04e-07	2.57e-07	Adenine phosphoribosyltransferase (EC 2.4.2.7)	KEGG_ENZYME:2.4.2.7	K00759	APRT, apt; adenine phosphoribosyltransferase [EC:2.4.2.7]	187	00230 04147	Purine metabolism [PATH:ko00230], Exosome [BR:ko04147],	09104 09183	09100 09180
D|1136176.5.peg.852	1	955165	957429	+	2265	5213.5	5126	4976.5	4685	5282.5	5239	1603.5	1747.5	1966.5	1520.5	1610	1757	3512.89	3586.77	3512.4	3454.85	3492.45	3420.68	2427.61	2443.68	2584.53	2330.77	2278.95	2630.63	2973.02	0.5133	0.0386469	13.2818	2.95e-40	3.31e-39	DNA polymerase III subunits gamma and tau (EC 2.7.7.7)	KEGG_ENZYME:2.7.7.7	K02343	dnaX; DNA polymerase III subunit gamma/tau [EC:2.7.7.7]	319	03030 03430 03440 03032 03400	DNA replication [PATH:ko03030], Mismatch repair [PATH:ko03430], Homologous recombination [PATH:ko03440], DNA replication proteins [BR:ko03032], DNA repair and recombination proteins [BR:ko03400],	09124 09182	09120 09180
D|1136176.5.peg.853	1	957581	957910	+	330	1540	1467	1392	1397	1432	1539	330	420	427	398	532	463	1037.76	1026.49	982.568	1030.19	946.836	1004.85	499.757	587.491	561.34	610.295	753.046	693.215	811.153	0.702264	0.0843735	8.32327	8.56e-17	3.77e-16	D000557: hypothetical protein co-occurring with RecR	NA	K09747	ebfC; nucleoid-associated protein EbfC	94	99998	Others,	09192	09190
D|1136176.5.peg.854	1	958019	958588	+	570	509	513	493	460	510	544	170	210	255	192	223	222	343.001	358.957	347.993	339.217	337.211	355.192	257.451	293.745	335.227	294.414	315.656	332.384	325.871	0.184481	0.0648827	2.8433	0.00446492	0.00692026	Recombination protein RecR	NA	K06187	recR; recombination protein RecR	137	03440 03400	Homologous recombination [PATH:ko03440], DNA repair and recombination proteins [BR:ko03400],	09124 09182	09120 09180
D|1136176.5.peg.855	1	958684	959373	-	690	11034	10605	10645	9801	10980	11586	4571	4935	6165	5162	5215	5470	7435.5	7420.54	7513.97	7227.53	7259.96	7564.81	6922.39	6903.02	8104.6	7915.43	7381.83	8189.82	7486.62	-0.0319585	0.0504041	-0.634047	0.52605	0.574031	Aquaporin Z	NA	K06188	aqpZ; aquaporin Z	255	02000	Transporters [BR:ko02000],	09183	09180
D|1136176.5.peg.856	1	959474	959722	-	249	18	18	16	18	17	22	8	3	10	4	3	11	12.1297	12.595	11.2939	13.2737	11.2404	14.3644	12.1153	4.19636	13.1461	6.13362	4.2465	16.4695	10.9337	0.413927	0.296126	1.39781	0.16217	0.198828	proteinase inhibitor%2C putative	NA	K06940	K06940; uncharacterized protein	68	99997	Function unknown,	09194	09190
D|1136176.5.peg.857	1	959882	960319	+	438	22	49	36	31	33	41	13	23	14	15	32	16	14.8252	34.2863	25.4113	22.8602	21.8195	26.77	19.6874	32.1721	18.4046	23.0011	45.296	23.9556	25.7074	-0.158027	0.238339	-0.663034	0.507309	0.555932	YcgN (Fragment)	NA	K09160	K09160; uncharacterized protein	150	99997	Function unknown,	09194	09190
D|1136176.5.peg.858	1	960458	962035	-	1578	146	157	147	138	158	159	74	93	83	58	111	87	98.3852	109.856	103.763	101.765	104.469	103.815	112.067	130.087	109.113	88.9375	157.12	130.259	112.47	-0.228399	0.108217	-2.11055	0.0348107	0.0477939	Alkaline phosphatase (EC 3.1.3.1)	KEGG_ENZYME:3.1.3.1	K01077	E3.1.3.1, phoA, phoB; alkaline phosphatase [EC:3.1.3.1]	275	00730 00790 02020 04147 00537	Thiamine metabolism [PATH:ko00730], Folate biosynthesis [PATH:ko00790], Two-component system [PATH:ko02020], Exosome [BR:ko04147], Glycosylphosphatidylinositol (GPI)-anchored proteins [BR:ko00537],	09108 09132 09183	09100 09130 09180
D|1136176.5.peg.859	1	962229	964115	-	1887	139	123	114	118	125	150	56	55	65	55	79	47	93.6681	86.0656	80.469	87.0164	82.6498	97.9391	84.8072	76.9333	85.4499	84.3372	111.824	70.3696	86.7941	0.0382939	0.113775	0.336574	0.736438	0.772203	Choline-glycine betaine transporter	NA	K03451	TC.BCT; betaine/carnitine transporter, BCCT family	334	99977	Transport,	09193	09190
D|1136176.5.peg.860	1	964291	964644	-	354	1248	1276	1304	1419	1409	1337	768	745	526	918	579	512	840.991	892.844	920.452	1046.41	931.628	872.963	1163.07	1042.1	691.487	1407.67	819.574	766.58	949.647	-0.0970592	0.152867	-0.634926	0.525477	0.573539	D01200881: hypothetical protein	NA			12
D|1136176.5.peg.861	1	964898	965857	-	960	2511	2396	2393	2249	2607	2593	1280	1250	1322	1284	1219	1222	1692.09	1676.53	1689.14	1658.47	1723.74	1693.04	1938.45	1748.48	1737.92	1968.89	1725.49	1829.61	1756.82	-0.110505	0.0403417	-2.73923	0.00615825	0.00941897	Uncharacterized iron-regulated protein	NA			136
D|1136176.5.peg.862	1	965933	966748	-	816	602	566	544	607	596	574	172	186	169	190	171	160	405.671	396.042	383.992	447.618	394.074	374.78	260.479	260.174	222.17	291.347	242.05	239.556	326.496	0.666327	0.0738779	9.0193	1.89e-19	9.65e-19	Ribosomal RNA large subunit methyltransferase A (EC 2.1.1.51)	KEGG_ENZYME:2.1.1.51	K00563	rlmA1; 23S rRNA (guanine745-N1)-methyltransferase [EC:2.1.1.187]	171	03009	Ribosome biogenesis [BR:ko03009],	09182	09180
D|1136176.5.peg.863	1	966941	968977	-	2037	805	807	757	741	802	853	320	432	459	351	453	342	542.466	564.675	534.342	546.434	530.281	556.947	484.613	604.276	603.408	538.225	641.221	512.051	554.912	-0.0492433	0.066234	-0.743474	0.457195	0.506394	Methyl-accepting chemotaxis protein	NA	K03406	mcp; methyl-accepting chemotaxis protein	132	02020 02030 02035	Two-component system [PATH:ko02020], Bacterial chemotaxis [PATH:ko02030], Bacterial motility proteins [BR:ko02035],	09132 09142 09183	09130 09140 09180
D|1136176.5.peg.864	1	969308	970192	-	885	963	952	970	932	1027	1011	280	309	380	327	359	354	648.938	666.134	684.692	687.282	679.051	660.109	424.036	432.225	499.553	501.423	508.164	530.018	576.802	0.475319	0.0568352	8.36312	6.11e-17	2.72e-16	Aldose 1-epimerase family protein YeaD	NA	K01792	E5.1.3.15; glucose-6-phosphate 1-epimerase [EC:5.1.3.15]	136	00010	Glycolysis / Gluconeogenesis [PATH:ko00010],	09101	09100
D|1136176.5.peg.865	1	970432	971427	-	996	10907	12079	11366	9512	12069	12600	4688	4811	6240	4027	5934	5876	7349.91	8451.93	8022.9	7014.41	7980	8226.88	7099.58	6729.57	8203.19	6175.02	8399.57	8797.7	7704.22	0.0511907	0.0907948	0.563806	0.572886	0.620181	NAD-dependent glyceraldehyde-3-phosphate dehydrogenase (EC 1.2.1.12)	KEGG_ENZYME:1.2.1.12	K00134	GAPDH, gapA; glyceraldehyde 3-phosphate dehydrogenase [EC:1.2.1.12]	296	00010 00710 04066 05130 05132 05010 05415 04131 04147	Glycolysis / Gluconeogenesis [PATH:ko00010], Carbon fixation in photosynthetic organisms [PATH:ko00710], HIF-1 signaling pathway [PATH:ko04066], Pathogenic Escherichia coli infection [PATH:ko05130], Salmonella infection [PATH:ko05132], Alzheimer disease [PATH:ko05010], Diabetic cardiomyopathy [PATH:ko05415], Membrane trafficking [BR:ko04131], Exosome [BR:ko04147],	09101 09102 09132 09171 09164 09166 09182 09183	09100 09130 09160 09180
D|1136176.5.peg.866	1	971786	972184	+	399	1688	1775	1928	1774	1905	1966	1125	1214	1081	1133	1043	998	1137.49	1242	1360.91	1308.2	1259.58	1283.65	1703.72	1698.13	1421.1	1737.35	1476.37	1494.23	1426.89	-0.327738	0.0656448	-4.99259	5.96e-07	1.39e-06	Peptide methionine sulfoxide reductase MsrB (EC 1.8.4.12)	KEGG_ENZYME:1.8.4.12	K07305	msrB; peptide-methionine (R)-S-oxide reductase [EC:1.8.4.12]	76	99980	Enzymes with EC numbers,	09191	09190
D|1136176.5.peg.867	1	972355	973161	-	807	602	605	615	574	657	669	206	222	249	183	200	198	405.671	423.331	434.109	423.283	434.407	436.808	311.97	310.531	327.339	280.613	283.1	296.451	363.968	0.497024	0.0590221	8.42098	3.73e-17	1.68e-16	D01200921: hypothetical protein	NA			55
D|1136176.5.peg.868	1	973277	973558	+	282	264	253	239	220	261	274	95	90	98	77	98	85	177.902	177.029	168.702	162.234	172.573	178.902	143.869	125.891	128.832	118.072	138.719	127.264	151.666	0.407322	0.0840803	4.84444	1.27e-06	2.87e-06	Uncharacterized protein YeaC	NA	K09916	K09916; uncharacterized protein	70	99997	Function unknown,	09194	09190
D|1136176.5.peg.869	1	973831	974847	-	1017	745	688	667	611	676	714	243	258	237	211	258	221	502.034	481.408	470.814	450.568	446.97	466.19	368.003	360.887	311.564	323.548	365.199	330.887	406.506	0.452767	0.0611546	7.40364	1.32e-13	4.76e-13	L-asparaginase (EC 3.5.1.1)	KEGG_ENZYME:3.5.1.1	K01424	E3.5.1.1, ansA, ansB; L-asparaginase [EC:3.5.1.1]	358	00250 00460	Alanine, aspartate and glutamate metabolism [PATH:ko00250], Cyanoamino acid metabolism [PATH:ko00460],	09105 09106	09100
D|1136176.5.peg.870	1	974966	976816	-	1851	17581	15499	15219	15263	16516	16653	10103	10389	10198	8859	8753	8808	11847.3	10845	10742.6	11255.4	10920.3	10873.2	15300.1	14532	13406.4	13584.4	12389.9	13187.6	12407	-0.309614	0.052794	-5.86457	4.5e-09	1.23e-08	Signal peptide peptidase SppA (EC 3.4.21.-)	KEGG_ENZYME:3.4.21.-	K04773	sppA; protease IV [EC:3.4.21.-]	337	01002	Peptidases and inhibitors [BR:ko01002],	09181	09180
D|1136176.5.peg.871	1	977060	979105	+	2046	33556	34218	33051	28957	37412	35237	30574	30710	29394	21212	27092	27287	22612.4	23943	23329.6	21353.7	24736.7	23007.2	46301.7	42956.8	38641.8	32526.6	38348.7	40854.8	31551.1	-0.785901	0.0769987	-10.2067	1.85e-24	1.15e-23	2%2C4-dienoyl-CoA reductase [NADPH] (EC 1.3.1.34)	KEGG_ENZYME:1.3.1.34	K00219	fadH; 2,4-dienoyl-CoA reductase (NADPH2) [EC:1.3.1.34]	436	99980	Enzymes with EC numbers,	09191	09190
D|1136176.5.peg.872	1	979305	979853	+	549	1567	1451	1428	1410	1640	1609	1369	1318	1328	1403	1255	1284	1055.96	1015.29	1007.98	1039.77	1084.37	1050.56	2073.23	1843.6	1745.81	2151.37	1776.45	1922.44	1480.57	-0.879429	0.0568153	-15.4787	4.83e-54	8.46e-53	D002003: Protein YdjA	NA			116
D|1136176.5.peg.873	1	979968	981959	+	1992	820.5	645	638.5	727.5	690.5	703	278.5	235	298	238	271	238	552.574	451.32	450.344	536.11	456.227	459.008	421.007	328.715	391.755	364.95	383.6	356.34	429.329	0.371111	0.0812115	4.56968	4.88e-06	1.05e-05	DNA topoisomerase III (EC 5.99.1.2)	KEGG_ENZYME:5.99.1.2	K03169	topB; DNA topoisomerase III [EC:5.6.2.1]	400	03032	DNA replication proteins [BR:ko03032],	09182	09180
D|1136176.5.peg.874	1	981978	982979	-	1002	5073.5	4022	4119	4725.5	4221.5	4405.5	488.5	356.5	282	576.5	238	325	3418.55	2814.28	2907.47	3484.34	2790.92	2876.14	739.035	497.968	370.721	883.241	336.889	486.598	1800.51	2.46527	0.202041	12.2019	3.04e-34	2.73e-33	D01201968: hypothetical protein	NA			69
D|1136176.5.peg.875	1	982987	983673	-	687	11930	9314	9913.5	11597	10182	10333.5	1214	867.5	666	1413.5	478	665	8039.28	6517.2	6997.27	8551.95	6732.32	6746.69	1838.5	1212.75	875.533	2166.7	676.609	995.655	4279.21	2.48894	0.234431	10.6169	2.49e-26	1.67e-25	Short chain dehydrogenase	NA			109
D|1136176.5.peg.876	1	983933	984853	+	921	141	126	114	132	126	140	49	78	51	62	62	59	95.0159	88.1648	80.469	97.3404	83.311	91.4098	74.2063	109.105	67.0453	95.0711	87.761	88.3363	88.103	0.0404358	0.114795	0.352243	0.724656	0.76226	Histone deacetylase/AcuC/AphA family protein	NA			167
D|1136176.5.peg.877	1	985061	987184	+	2124	315	267	263	252	290	296	110	95	123	109	108	98	212.269	186.825	185.643	185.832	191.747	193.266	166.586	132.885	161.698	167.141	152.874	146.728	173.625	0.318562	0.0818967	3.88981	0.0001	0.000189	methyl-accepting chemotaxis sensory transducer	NA			295
D|1136176.5.peg.878	1	987972	989774	-	1803	1563	1475	1528.5	1461.5	1585.5	1653.5	657.5	734	829	702	770.5	786	1053.26	1032.09	1078.57	1077.38	1048	1079.29	994.971	1026.71	1089.82	1076.45	1089.93	1176.82	1068.61	-0.0194504	0.0426632	-0.455905	0.648458	0.692305	D001881: hydrolase of alkaline phosphatase superfamily	NA	K07014	K07014; uncharacterized protein	286	99997	Function unknown,	09194	09190
D|1136176.5.peg.879	1	989803	990030	-	228	861	832	821.5	818.5	887.5	969.5	374.5	493	410	381	394.5	323	580.203	582.168	579.518	603.216	586.483	632.686	566.391	689.602	538.992	584.227	557.707	483.604	582.066	0.0590705	0.071761	0.823156	0.410419	0.458966	D002927: hypothetical protein	NA	K09904	K09904; uncharacterized protein	41	99997	Function unknown,	09194	09190
D|1136176.5.peg.880	1	990115	991119	+	1005	1014	1011	937	1032	1069	1012	385	404	418	412	388	423	683.306	707.418	661.398	761.025	706.821	660.762	583.05	565.11	549.509	631.763	549.214	633.326	641.058	0.252675	0.0578893	4.3648	1.27e-05	2.62e-05	Nucleoid-associated protein NdpA	NA	K06899	ndpA; nucleoid-associated protein	212	03036	Chromosome and associated proteins [BR:ko03036],	09182	09180
D|1136176.5.peg.881	1	991226	992710	+	1485	1397	1417	1424	1416	1590	1518	648	829	849	725	721	675	941.398	991.504	1005.16	1044.2	1051.31	991.143	981.341	1159.59	1116.11	1111.72	1020.58	1010.63	1035.39	-0.0880295	0.0517108	-1.70234	0.0886914	0.114236	D01199752: hypothetical protein	NA			NA
D|1136176.5.peg.882	1	992787	993965	+	1179	280	273	275	292	280	306	157	144	230	150	177	143	188.684	191.024	194.114	215.329	185.136	199.796	237.763	201.425	302.361	230.011	250.543	214.103	217.524	-0.294297	0.0915741	-3.21376	0.00131011	0.00218524	Methyl-accepting chemotaxis protein	NA			26
D|1136176.5.peg.883	1	994077	995513	-	1437	194	185	222	180	191	194	94	75	72	101	68	71	130.731	129.448	156.703	132.737	126.289	126.668	142.355	104.909	94.6522	154.874	96.254	106.303	125.16	0.20423	0.120996	1.68791	0.0914278	0.117369	Na+/H+ antiporter	NA	K03315	nhaC; Na+:H+ antiporter, NhaC family	331	02000	Transporters [BR:ko02000],	09183	09180
D|1136176.5.peg.884	1	996023	997141	+	1119	591	602	594	557	660	578	349	318	361	265	338	288	398.258	421.232	419.286	410.747	436.391	377.392	528.531	444.814	474.576	406.352	478.439	431.201	435.602	-0.166871	0.0666068	-2.50532	0.012234	0.0180001	Aspartate-semialdehyde dehydrogenase (EC 1.2.1.11)	KEGG_ENZYME:1.2.1.11	K00133	asd; aspartate-semialdehyde dehydrogenase [EC:1.2.1.11]	295	00260 00270 00300 00261	Glycine, serine and threonine metabolism [PATH:ko00260], Cysteine and methionine metabolism [PATH:ko00270], Lysine biosynthesis [PATH:ko00300], Monobactam biosynthesis [PATH:ko00261],	09105 09110	09100
D|1136176.5.peg.885	1	997206	998051	-	846	284	288	341	299	332	327	130	180	167	145	130	118	191.379	201.52	240.701	220.491	219.518	213.507	196.874	251.782	219.541	222.344	184.015	176.673	211.529	0.038802	0.0922517	0.42061	0.67404	0.716978	Potassium voltage-gated channel subfamily KQT%3B possible potassium channel%2C VIC family	NA	K10716	kch, trkA, mthK, pch; voltage-gated potassium channel	161	02000	Transporters [BR:ko02000],	09183	09180
D|1136176.5.peg.886	1	998195	998833	-	639	479	525	474	449	505	554	135	145	165	146	150	179	322.784	367.353	334.581	331.105	333.905	361.722	204.446	202.824	216.911	223.877	212.325	268.003	281.653	0.628693	0.074988	8.38392	5.12e-17	2.29e-16	Putative membrane protein	NA			106
D|1136176.5.peg.887	1	999188	999313	+	126	3547	3235	2952	2850	2990	3236	551	407	317	575	275	389	2390.22	2263.6	2083.72	2101.67	1976.98	2112.87	834.443	569.306	416.733	881.708	389.262	582.421	1383.58	1.81622	0.178947	10.1495	3.33e-24	2.06e-23	hypothetical protein	NA			NA
D|1136176.5.peg.888	1	999473	1002178	+	2706	152088	140058	131609	131836	136457	143206	32440	30049	26033	29446	21568	23891	102488	98001.5	92898.6	97219.5	90225.1	93503.1	49127.6	42032.2	34223.4	45152.6	30529.5	35770.2	67597.6	1.27803	0.105968	12.0605	1.71e-33	1.48e-32	Alcohol dehydrogenase (EC 1.1.1.1)%3B Acetaldehyde dehydrogenase (EC 1.2.1.10)	KEGG_ENZYME:1.1.1.1,KEGG_ENZYME:1.2.1.10	K04072	adhE; acetaldehyde dehydrogenase / alcohol dehydrogenase [EC:1.2.1.10 1.1.1.1]	739	00010 00620 00650 00071 00350 00625 00626 05146	Glycolysis / Gluconeogenesis [PATH:ko00010], Pyruvate metabolism [PATH:ko00620], Butanoate metabolism [PATH:ko00650], Fatty acid degradation [PATH:ko00071], Tyrosine metabolism [PATH:ko00350], Chloroalkane and chloroalkene degradation [PATH:ko00625], Naphthalene degradation [PATH:ko00626], Amoebiasis [PATH:ko05146],	09101 09103 09105 09111 09174	09100 09160
D|1136176.5.peg.889	1	1002330	1003013	-	684	9822	9414	8727	8842	9599	9516	7372	9155	9006	6984	8453	7362	6618.76	6587.17	6160.11	6520.33	6346.84	6213.25	11164.3	12805.9	11839.4	10709.3	11965.2	11022.6	8996.1	-0.854448	0.0472297	-18.0913	3.73e-73	1.02e-71	Sorbitol-6-phosphate 2-dehydrogenase (EC 1.1.1.140)	KEGG_ENZYME:1.1.1.140	K00059	fabG, OAR1; 3-oxoacyl-[acyl-carrier protein] reductase [EC:1.1.1.100]	16	00061 00780 00333 01004	Fatty acid biosynthesis [PATH:ko00061], Biotin metabolism [PATH:ko00780], Prodigiosin biosynthesis [PATH:ko00333], Lipid biosynthesis proteins [BR:ko01004],	09103 09108 09110 09181	09100 09180
D|1136176.5.peg.890	1	1003280	1003795	-	516	756	718	684	655	749	729	399	366	330	414	316	342	509.447	502.399	482.814	483.015	495.237	475.984	604.252	511.956	433.823	634.829	447.298	512.051	507.759	-0.0903329	0.0882664	-1.02341	0.306113	0.353037	Potential queD like 2	NA			33
D|1136176.5.peg.891	1	1004049	1004633	-	585	15350	16187	15209	13715	15802	16404	3831	4608	5141	4323	4878	4922	10343.9	11326.4	10735.5	10113.8	10448.3	10710.6	5801.72	6445.61	6758.43	6628.91	6904.81	7369.34	8632.28	0.674061	0.055202	12.2108	2.72e-34	2.45e-33	Superoxide dismutase [Fe] (EC 1.15.1.1)	KEGG_ENZYME:1.15.1.1	K04564	SOD2; superoxide dismutase, Fe-Mn family [EC:1.15.1.1]	243	04013 04068 04146 04211 04212 04213 05016	MAPK signaling pathway - fly [PATH:ko04013], FoxO signaling pathway [PATH:ko04068], Peroxisome [PATH:ko04146], Longevity regulating pathway [PATH:ko04211], Longevity regulating pathway - worm [PATH:ko04212], Longevity regulating pathway - multiple species [PATH:ko04213], Huntington disease [PATH:ko05016],	09132 09141 09149 09164	09130 09140 09150 09160
D|1136176.5.peg.892	1	1004903	1005241	+	339	651	677	672	651	678	676	418	411	412	337	431	393	438.69	473.711	474.343	480.065	448.292	441.379	633.026	574.902	541.621	516.757	610.08	588.41	518.44	-0.33022	0.0578551	-5.70771	1.15e-08	3.04e-08	Glutaredoxin-related protein	NA	K07390	grxD, GLRX5; monothiol glutaredoxin	93	03110 03029	Chaperones and folding catalysts [BR:ko03110], Mitochondrial biogenesis [BR:ko03029],	09182	09180
D|1136176.5.peg.893	1	1005341	1005970	+	630	506	481	448	437	552	546	256	289	313	235	266	287	340.979	336.566	316.229	322.256	364.981	356.498	387.69	404.25	411.474	360.35	376.523	429.704	367.292	-0.217874	0.0630382	-3.45621	0.000548	0.000957	Thioredoxin	NA	K07396	K07396; putative protein-disulfide isomerase	89	99975	Protein processing,	09192	09190
D|1136176.5.peg.894	1	1006242	1007567	-	1326	187	166	173	182	181	209	50	57	59	53	68	66	126.014	116.154	122.115	134.212	119.677	136.462	75.7208	79.7309	77.5622	81.2704	96.254	98.8169	105.332	0.568229	0.103798	5.47436	4.39e-08	1.12e-07	Histidine permease YuiF	NA	K07084	yuiF; putative amino acid transporter	312	02000	Transporters [BR:ko02000],	09183	09180
D|1136176.5.peg.895	1	1007626	1008276	-	651	113	124	132	123	138	127	71	66	93	55	75	56	76.1475	86.7654	93.1746	90.7036	91.2454	82.9217	107.523	92.32	122.259	84.3372	106.162	83.8446	93.1171	-0.201618	0.109944	-1.83383	0.0666796	0.0875605	Ribonuclease T (EC 3.1.13.-)	KEGG_ENZYME:3.1.13.-	K03683	rnt; ribonuclease T [EC:3.1.13.-]	154	03016	Transfer RNA biogenesis [BR:ko03016],	09182	09180
D|1136176.5.peg.896	1	1008465	1009346	+	882	238	232	244	228	266	270	148	109	139	156	146	156	160.381	162.335	172.232	168.133	175.879	176.29	224.133	152.468	182.731	239.211	206.663	233.567	187.835	-0.28256	0.0964734	-2.92889	0.00340175	0.00534561	Sodium-type flagellar protein motY precursor	NA	K21218	motY; sodium-type flagellar protein MotY	162	02040 02000 02035	Flagellar assembly [PATH:ko02040], Transporters [BR:ko02000], Bacterial motility proteins [BR:ko02035],	09142 09183	09140 09180
D|1136176.5.peg.897	1	1009462	1009896	-	435	61	86	88	82	100	112	47	39	67	51	48	46	41.1062	60.176	62.1164	60.469	66.1198	73.1278	71.1775	54.5527	88.0792	78.2036	67.944	68.8724	65.9954	-0.240485	0.148172	-1.62301	0.104587	0.133121	D01199914: hypothetical protein	NA			30
D|1136176.5.peg.898	1	1010101	1010517	-	417	587	536	543	516	574	631	181	201	250	167	198	199	395.562	375.05	383.286	380.513	379.528	411.997	274.109	281.156	328.654	256.079	280.269	297.948	337.013	0.434245	0.0646853	6.7132	1.9e-11	6.02e-11	Lactoylglutathione lyase (EC 4.4.1.5)	KEGG_ENZYME:4.4.1.5	K01759	GLO1, gloA; lactoylglutathione lyase [EC:4.4.1.5]	107	00620	Pyruvate metabolism [PATH:ko00620],	09101	09100
D|1136176.5.peg.899	1	1010638	1011273	-	636	608	580	610	560	604	600	243	253	252	240	231	221	409.714	405.838	430.58	412.959	399.364	391.756	368.003	353.893	331.283	368.017	326.98	330.887	377.439	0.238002	0.0576421	4.12896	3.64e-05	7.19e-05	Endonuclease III (EC 4.2.99.18)	KEGG_ENZYME:4.2.99.18	K10773	NTH; endonuclease III [EC:4.2.99.18]	182	03410 03400	Base excision repair [PATH:ko03410], DNA repair and recombination proteins [BR:ko03400],	09124 09182	09120 09180
D|1136176.5.peg.900	1	1011457	1012149	-	693	940.5	926	853.5	763.5	910.5	950.5	355.5	292	395.5	338	380.5	343	633.439	647.941	602.106	562.657	601.69	620.281	537.617	408.446	519.273	518.291	537.89	513.548	558.598	0.274276	0.0675385	4.06103	4.89e-05	9.51e-05	Electron transport complex protein RnfE	NA	K03613	rnfE; Na+-translocating ferredoxin:NAD+ oxidoreductase subunit E	213	99982	Energy metabolism,	09191	09190
D|1136176.5.peg.901	1	1012149	1012778	-	630	798.5	743	680	695	714	747.5	223	227	265	234	277	254.5	537.749	519.892	479.99	512.512	472.096	487.736	337.715	317.525	348.373	358.817	392.093	380.295	428.733	0.495933	0.0638247	7.77023	7.83e-15	3.07e-14	Electron transport complex protein RnfG	NA	K03612	rnfG; Na+-translocating ferredoxin:NAD+ oxidoreductase subunit G	119	99982	Energy metabolism,	09191	09190
D|1136176.5.peg.902	1	1012791	1013837	-	1047	488.5	450	424.5	456	457.5	467	85.5	112	124	91	117	109.5	328.849	314.874	299.288	336.267	302.168	304.917	128.725	156.664	163.012	139.54	165.613	163.198	233.593	1.03698	0.078442	13.2197	6.76e-40	7.45e-39	Electron transport complex protein RnfD	NA	K03614	rnfD; Na+-translocating ferredoxin:NAD+ oxidoreductase subunit D [EC:7.2.1.2]	265	99980	Enzymes with EC numbers,	09191	09190
D|1136176.5.peg.903	1	1013837	1016638	-	2802	2013	1780.5	1759.5	1877.5	1882.5	1866	411	440	415.5	443	356.5	430.5	1356.5	1245.5	1241.62	1384.15	1244.38	1218.36	622.425	615.466	545.565	679.298	503.918	643.807	941.75	1.09238	0.0710893	15.3663	2.76e-53	4.65e-52	Electron transport complex protein RnfC	NA	K03615	rnfC; Na+-translocating ferredoxin:NAD+ oxidoreductase subunit C [EC:7.2.1.2]	199	99980	Enzymes with EC numbers,	09191	09190
D|1136176.5.peg.904	1	1016650	1017243	-	594	232	213.5	240.5	218	197	216	79.5	78.5	109	83.5	86	86	156.338	149.04	169.408	160.759	130.256	141.032	119.639	109.105	143.293	127.273	121.733	128.761	138.053	0.271161	0.0974029	2.78392	0.00537071	0.00824978	Electron transport complex protein RnfB	NA	K03616	rnfB; Na+-translocating ferredoxin:NAD+ oxidoreductase subunit B [EC:7.2.1.2]	124	99980	Enzymes with EC numbers,	09191	09190
D|1136176.5.peg.905	1	1017246	1017824	-	579	265.5	263	273	257	287.5	275	197.5	169.5	208	142.5	164	161.5	178.576	184.027	192.702	189.519	189.764	179.555	298.34	236.395	273.44	217.743	232.142	241.053	217.771	-0.429392	0.078572	-5.46495	4.63e-08	1.18e-07	Electron transport complex protein RnfA	NA	K03617	rnfA; Na+-translocating ferredoxin:NAD+ oxidoreductase subunit A	167	99982	Energy metabolism,	09191	09190
D|1136176.5.peg.906	1	1018089	1019093	-	1005	184	151	139	171	162	164	81	107	66	61	80	60	123.992	105.658	98.1157	126.1	107.114	107.08	122.668	149.67	86.7645	93.5377	113.24	89.8335	110.314	0.0261541	0.128885	0.202925	0.839194	0.862417	Galactose operon repressor%2C GalR-LacI family of transcriptional regulators	NA	K02529	lacI, galR; LacI family transcriptional regulator	174	03000	Transcription factors [BR:ko03000],	09182	09180
D|1136176.5.peg.907	1	1019352	1022453	-	3102	2335	1971	1919	2065	2002	2050	352	298	318	373	239	276	1573.49	1379.15	1354.56	1522.79	1323.72	1338.5	533.074	416.839	418.047	571.96	338.304	413.234	931.972	1.65919	0.110491	15.0165	5.73e-51	8.95e-50	Beta-galactosidase (EC 3.2.1.23)	KEGG_ENZYME:3.2.1.23	K01190	lacZ; beta-galactosidase [EC:3.2.1.23]	576	00052 00600 00511	Galactose metabolism [PATH:ko00052], Sphingolipid metabolism [PATH:ko00600], Other glycan degradation [PATH:ko00511],	09101 09103 09107	09100
D|1136176.5.peg.908	1	1022567	1023469	-	903	303	306	281	287	311	305	135	188	185	152	150	136	204.183	214.115	198.349	211.642	205.633	199.143	204.446	262.972	243.204	233.077	212.325	203.623	216.059	-0.144181	0.0751289	-1.91912	0.054969	0.0730298	D01204434: hypothetical protein	NA	K05775	malM; maltose operon periplasmic protein	14	99996	General function prediction only,	09194	09190
D|1136176.5.peg.909	1	1023577	1024818	-	1242	92	85	77	92	93	98	40	36	32	38	32	30	61.9962	59.4763	54.3518	67.8433	61.4914	63.9868	60.5766	50.3563	42.0677	58.2694	45.296	44.9168	55.8857	0.298528	0.133605	2.23441	0.0254561	0.0357108	Maltoporin (maltose/maltodextrin high-affinity receptor%2C phage lambda receptor protein)	NA	K02024	lamB; maltoporin	153	02000	Transporters [BR:ko02000],	09183	09180
D|1136176.5.peg.910	1	1025663	1027780	+	2118	676	717	683	615	700	723	331	351	395	344	443	329	455.537	501.7	482.108	453.518	462.839	472.066	501.271	490.974	519.273	527.491	627.066	492.587	498.869	-0.160161	0.0644183	-2.48626	0.0129094	0.0189397	Alpha-galactosidase (EC 3.2.1.22)	KEGG_ENZYME:3.2.1.22	K07407	E3.2.1.22B, galA, rafA; alpha-galactosidase [EC:3.2.1.22]	423	00052 00561 00600 00603	Galactose metabolism [PATH:ko00052], Glycerolipid metabolism [PATH:ko00561], Sphingolipid metabolism [PATH:ko00600], Glycosphingolipid biosynthesis - globo and isoglobo series [PATH:ko00603],	09101 09103 09107	09100
D|1136176.5.peg.911	1	1028258	1029631	+	1374	954	908	843	823	896	948	352	375	374	310	313	357	642.873	635.346	595.047	606.903	592.434	618.975	533.074	524.545	491.666	475.355	443.051	534.51	557.815	0.298947	0.055233	5.41247	6.22e-08	1.56e-07	Melibiose carrier protein%2C Na+/melibiose symporter	NA	K11104	melB; melibiose permease	233	02000	Transporters [BR:ko02000],	09183	09180
D|1136176.5.peg.912	1	1030519	1032549	+	2031	1789	1643	1780	1702	1832	1967	846	861	970	841	804	790	1205.56	1149.64	1256.45	1255.1	1211.32	1284.31	1281.2	1204.36	1275.18	1289.59	1138.06	1182.81	1227.8	-0.0015139	0.0455979	-0.0332011	0.973514	0.978574	Excinuclease ABC subunit B	NA	K03702	uvrB; excinuclease ABC subunit B	536	03420 03400	Nucleotide excision repair [PATH:ko03420], DNA repair and recombination proteins [BR:ko03400],	09124 09182	09120 09180
D|1136176.5.peg.913	1	1032852	1034240	+	1389	4336	4188	4084	4156.5	4386.5	4650.5	3706.5	3832	3980.5	3693.5	3682.5	3616	2921.91	2930.43	2882.77	3064.75	2900.02	3036.11	5612.42	5360.15	5232.16	5662.86	5211.87	5413.97	4185.78	-0.873151	0.0320244	-27.2652	1.1e-163	1.54e-161	Regulatory protein LuxO	NA	K10912	luxO; two-component system, repressor protein LuxO	278	02020 02024 05111 02022	Two-component system [PATH:ko02020], Quorum sensing [PATH:ko02024], Biofilm formation - Vibrio cholerae [PATH:ko05111], Two-component system [BR:ko02022],	09132 09145 09183	09130 09140 09180
D|1136176.5.peg.914	1	1034265	1034609	+	345	367	376	360	404.5	437.5	416.5	277.5	278	381.5	260.5	322.5	275	247.311	263.095	254.113	297.921	288.944	271.618	419.493	388.863	500.868	398.685	455.791	411.737	349.87	-0.668309	0.0770147	-8.67768	4.04e-18	1.92e-17	Phosphorelay protein LuxU	NA			NA
D|1136176.5.peg.915	1	1034690	1035577	-	888	1581	1540	1543	1484	1698	1718	708	819	948	746	848	729	1065.39	1077.57	1089.15	1094.34	1122.71	1121.73	1072.21	1145.61	1246.25	1143.92	1200.34	1091.48	1122.56	-0.0717396	0.0429788	-1.66919	0.0950805	0.121789	D002813: LPPG:FO 2-phospho-L-lactate transferase like%2C CofD-like	NA			178
D|1136176.5.peg.916	1	1035913	1036902	+	990	3724	3810	3837	3119	3970	3858	3505	3184	3383	3445	2798	2680	2509.5	2665.94	2708.42	2300.04	2624.96	2518.99	5308.03	4453.74	4447.34	5282.58	3960.57	4012.56	3566.05	-0.841257	0.0832108	-10.1099	4.99e-24	3.08e-23	Molybdenum cofactor biosynthesis protein MoaA	NA	K03639	moaA, CNX2; GTP 3',8-cyclase [EC:4.1.99.22]	245	00790 04122	Folate biosynthesis [PATH:ko00790], Sulfur relay system [PATH:ko04122],	09108 09123	09100 09120
D|1136176.5.peg.917	1	1036992	1037504	+	513	1157.5	1080.5	1158.5	1011	1197	1130.5	562	640	566	605.5	548	476	779.669	755.698	817.395	745.539	791.454	737.808	851.101	895.224	744.072	927.71	775.694	712.679	794.504	-0.0837176	0.0676091	-1.23826	0.21562	0.257216	Molybdenum cofactor biosynthesis protein MoaB	NA	K03638	moaB; molybdopterin adenylyltransferase [EC:2.7.7.75]	173	00790 04122	Folate biosynthesis [PATH:ko00790], Sulfur relay system [PATH:ko04122],	09108 09123	09100 09120
D|1136176.5.peg.918	1	1037517	1037996	+	480	1086	1087.5	1137	965	1176	1123.5	566.5	583.5	613	584	551	498	731.824	760.596	802.572	711.617	777.569	733.237	857.159	815.493	805.859	895.508	779.94	745.618	784.749	-0.116399	0.0532771	-2.18478	0.0289053	0.0401973	Molybdenum cofactor biosynthesis protein MoaC	NA	K03637	moaC, CNX3; cyclic pyranopterin monophosphate synthase [EC:4.6.1.17]	184	00790 04122	Folate biosynthesis [PATH:ko00790], Sulfur relay system [PATH:ko04122],	09108 09123	09100 09120
[truncated: 3,725 more rows]
