# Supplementary material for: Polysaccharide breakdown products drive degradation-dispersal cycles of foraging bacteria through changes in metabolism and motility
Source: eLife. 2024 Oct 21;13:RP93855. doi: 10.7554/eLife.93855 (PMC11493405; doi:10.7554/eLife.93855)
Supplement: Supplementary file 9. [file elife-93855-supp9.xlsx]

## Sheet: Sheet 1
Geneid	Chr	Start	End	Strand	Length	L1_raw	L2_raw	L3_raw	L4_raw	L5_raw	L6_raw	P1_raw	P2_raw	P3_raw	P4_raw	P5_raw	P6_raw	L1_DESeq	L2_DESeq	L3_DESeq	L4_DESeq	L5_DESeq	L6_DESeq	P1_DESeq	P2_DESeq	P3_DESeq	P4_DESeq	P5_DESeq	P6_DESeq	baseMean	log2FoldChange	lfcSE	stat	pvalue	padj	RASTtk_Annotation	RASTtk_Ontology_term	BlastKOALA_KO	BlastKOALA_KO_Definition	BlastKOALA_KO_Score	KEGG_pathway	KEGG_pathway_descr	KEGG_CategB	KEGG_CategA
D|1136176.5.peg.313	1	353759	355117	+	1359	4445	3736	3764	4229	4032	4091	448	342	290	425	302	311	2995.36	2614.16	2656.89	3118.58	2665.95	2671.12	678.458	478.385	381.238	651.697	427.481	465.637	1650.41	2.44088	0.130453	18.7108	4.04e-78	1.22e-76	UDP-N-acetylmuramate:L-alanyl-gamma-D-glutamyl-meso-diaminopimelate ligase (EC 6.3.2.-)	KEGG_ENZYME:6.3.2.-	K02558	mpl; UDP-N-acetylmuramate: L-alanyl-gamma-D-glutamyl-meso-diaminopimelate ligase [EC:6.3.2.45]	340	99980	Enzymes with EC numbers,	09191	09190
D|1136176.5.peg.3876	2	1037794	1038357	-	564	231	156	171	188	214	198	24	9	16	26	12	15	155.664	109.156	120.703	138.636	141.496	129.28	36.346	12.5891	21.0338	39.8685	16.986	22.4584	78.6849	2.42999	0.186081	13.0588	5.66e-39	6.09e-38	N-acetylglutamate synthase (EC 2.3.1.1)	KEGG_ENZYME:2.3.1.1	K00661	maa; maltose O-acetyltransferase [EC:2.3.1.79]	110	99980	Enzymes with EC numbers,	09191	09190
D|1136176.5.peg.2021	1	2309941	2311533	+	1593	1458	1177	1214	1334	1314	1268	184	143	84	172	78	85	982.504	823.571	856.924	983.728	868.814	827.911	278.652	200.027	110.428	263.746	110.409	127.264	536.165	2.295	0.213882	10.7302	7.34e-27	5.03e-26	Alkyl hydroperoxide reductase protein F (EC 1.6.4.-)	KEGG_ENZYME:1.6.4.-	K03387	ahpF; NADH-dependent peroxiredoxin subunit F [EC:1.8.1.-]	365	99980	Enzymes with EC numbers,	09191	09190
D|1136176.5.peg.3356	2	455375	456544	+	1170	20434	16830	17723	19657	18547	19184	1950	1974	1700	2639	1692	1732	13769.9	11776.3	12510.1	14495.6	12263.2	12525.8	2953.11	2761.21	2234.84	4046.65	2395.03	2593.19	7860.41	2.1873	0.1263	17.3183	3.42e-67	8.24e-66	Peptide methionine sulfoxide reductase MsrA (EC 1.8.4.11) / Peptide methionine sulfoxide reductase MsrB (EC 1.8.4.12)	KEGG_ENZYME:1.8.4.11,KEGG_ENZYME:1.8.4.12	K12267	msrAB; peptide methionine sulfoxide reductase msrA/msrB [EC:1.8.4.11 1.8.4.12]	256	99980	Enzymes with EC numbers,	09191	09190
D|1136176.5.peg.2203	1	2511950	2512453	+	504	5044	4042	3793.5	4339	4143.5	4162.5	793.5	541	319.5	687	201	333	3399.01	2828.27	2677.36	3199.7	2739.34	2717.48	1200.93	756.744	419.362	1053.45	284.515	498.576	1814.56	2.05962	0.31319	6.57625	4.82e-11	1.48e-10	D002571: 4-hydroxybenzoyl-CoA thioesterase domain protein	NA	K07107	ybgC; acyl-CoA thioester hydrolase [EC:3.1.2.-]	49	99980	Enzymes with EC numbers,	09191	09190
D|1136176.5.peg.3554	2	683082	683675	+	594	2131	1866	1656.5	1807.5	1648.5	1786.5	296	228	227	245	150	180	1436.02	1305.68	1168.92	1332.53	1089.65	1166.13	448.267	318.924	298.417	375.684	212.325	269.501	785.171	1.96445	0.144713	13.5747	5.65e-42	6.76e-41	D01206171: hypothetical protein	NA	K03206	azr; azobenzene reductase [EC:1.7.1.6]	23	99980	Enzymes with EC numbers,	09191	09190
D|1136176.5.peg.2717	1	3135736	3136413	+	678	29	36	32	24	39	37	6	8	4	4	5	6	19.5423	25.1899	22.5878	17.6983	25.7867	24.1583	9.08649	11.1903	5.25846	6.13362	7.0775	8.98335	15.2244	1.50728	0.288983	5.2158	1.83e-07	4.45e-07	N-acetylmuramoyl-L-alanine amidase (EC 3.5.1.28)	KEGG_ENZYME:3.5.1.28	K01447	xlyAB; N-acetylmuramoyl-L-alanine amidase [EC:3.5.1.28]	20	99980	Enzymes with EC numbers,	09191	09190
D|1136176.5.peg.2885	1	3318278	3319531	-	1254	49179	38283	37691	41222	39002	40502	11895	7632	4816	13205	3202	6229	33140.3	26787.4	26604.9	30398.2	25788.1	26444.9	18014	10675.5	6331.18	20248.6	4532.43	9326.22	19857.6	1.2911	0.328738	3.92745	8.59e-05	0.000163	Na(+)-translocating NADH-quinone reductase subunit B (EC 1.6.5.-)	KEGG_ENZYME:1.6.5.-	K00347	nqrB; Na+-transporting NADH:ubiquinone oxidoreductase subunit B [EC:7.2.1.1]	348	99980	Enzymes with EC numbers,	09191	09190
D|1136176.5.peg.2261	1	2579403	2580407	-	1005	1684	1507	1504.5	1564	1676	1623.5	269.5	294	344	287.5	365.5	305	1134.8	1054.48	1061.63	1153.34	1108.17	1059.7	407.378	411.243	452.227	440.087	516.657	456.654	771.363	1.29098	0.0586064	22.0279	1.56e-107	9.03e-106	Thiamin biosynthesis lipoprotein ApbE	NA	K03734	apbE; FAD:protein FMN transferase [EC:2.7.1.180]	288	99980	Enzymes with EC numbers,	09191	09190
D|1136176.5.peg.3848	2	1011553	1012968	+	1416	222	197	173	208	209	197	37	42	42	43	48	38	149.599	137.845	122.115	153.385	138.19	128.627	56.0334	58.7491	55.2138	65.9364	67.944	56.8946	99.2111	1.20215	0.116881	10.2853	8.21e-25	5.18e-24	Aldehyde dehydrogenase (EC 1.2.1.3)	KEGG_ENZYME:1.2.1.3	K00154	E1.2.1.68; coniferyl-aldehyde dehydrogenase [EC:1.2.1.68]	235	99980	Enzymes with EC numbers,	09191	09190
D|1136176.5.peg.2874	1	3305451	3305978	-	528	202754	174827	174763	192999	189654	185603	51930	41009	34221	52958	28514	32565	136630	122330	123360	142323	125399	121185	78643.6	57362.9	44987.4	81206	40361.6	48757.2	93545.4	1.13438	0.161984	7.00306	2.5e-12	8.3e-12	Ferritin-like protein 2	NA	K02217	ftnA, ftn; ferritin [EC:1.16.3.2]	154	99980	Enzymes with EC numbers,	09191	09190
D|1136176.5.peg.4105	2	1307079	1308488	+	1410	945	864	855	927	831	879	171	207	217	196	167	207	636.808	604.559	603.517	683.595	549.456	573.923	258.965	289.549	285.271	300.547	236.388	309.926	444.375	1.11962	0.0788316	14.2027	8.82e-46	1.19e-44	Radical SAM family protein HutW%2C similar to coproporphyrinogen III oxidase%2C oxygen-independent%2C associated with heme uptake	NA	K21936	chuW; anaerobilin synthase [EC:2.1.1.342]	232	99980	Enzymes with EC numbers,	09191	09190
D|1136176.5.peg.903	1	1013837	1016638	-	2802	2013	1780.5	1759.5	1877.5	1882.5	1866	411	440	415.5	443	356.5	430.5	1356.5	1245.5	1241.62	1384.15	1244.38	1218.36	622.425	615.466	545.565	679.298	503.918	643.807	941.75	1.09238	0.0710893	15.3663	2.76e-53	4.65e-52	Electron transport complex protein RnfC	NA	K03615	rnfC; Na+-translocating ferredoxin:NAD+ oxidoreductase subunit C [EC:7.2.1.2]	199	99980	Enzymes with EC numbers,	09191	09190
D|1136176.5.peg.902	1	1012791	1013837	-	1047	488.5	450	424.5	456	457.5	467	85.5	112	124	91	117	109.5	328.849	314.874	299.288	336.267	302.168	304.917	128.725	156.664	163.012	139.54	165.613	163.198	233.593	1.03698	0.078442	13.2197	6.76e-40	7.45e-39	Electron transport complex protein RnfD	NA	K03614	rnfD; Na+-translocating ferredoxin:NAD+ oxidoreductase subunit D [EC:7.2.1.2]	265	99980	Enzymes with EC numbers,	09191	09190
D|1136176.5.peg.4312	2	1545119	1548286	+	3168	884	798	845	843	858	880	192	205	252	213	214	211	595.702	558.377	596.459	621.651	567.308	574.576	290.768	286.751	331.283	326.615	302.917	315.915	447.36	0.921346	0.0590907	15.5921	8.24e-55	1.49e-53	Chitodextrinase precursor (EC 3.2.1.14)	KEGG_ENZYME:3.2.1.14	K21606	endo_I; endo-chitodextinase [EC:3.2.1.202]	566	99980	Enzymes with EC numbers,	09191	09190
D|1136176.5.peg.3711	2	857378	858658	+	1281	44996.5	36846.5	35420	39255.5	36296	38654.5	13849	10113.5	7517.5	13393.5	4778.5	8832	30321.5	25781.9	25001.8	28947.7	23998.9	25238.2	20973.1	14145.9	9881.96	20536.9	6763.26	13223.5	20401.2	0.897272	0.221834	4.04479	5.24e-05	0.000101	Cyclopropane-fatty-acyl-phospholipid synthase (EC 2.1.1.79)%2C plant type	KEGG_ENZYME:2.1.1.79	K00574	cfa; cyclopropane-fatty-acyl-phospholipid synthase [EC:2.1.1.79]	208	99980	Enzymes with EC numbers,	09191	09190
D|1136176.5.peg.4328	2	1562333	1563529	+	1197	509	470	441	427	423	483	121	131	132	97	116	114	343.001	328.869	311.288	314.882	279.687	315.364	183.244	183.241	173.529	148.74	164.198	170.684	243.06	0.885571	0.0797935	11.0983	1.28e-28	9.32e-28	Flavohemoprotein (Hemoglobin-like protein) (Flavohemoglobin) (Nitric oxide dioxygenase) (EC 1.14.12.17)	KEGG_ENZYME:1.14.12.17	K05916	hmp, YHB1; nitric oxide dioxygenase [EC:1.14.12.17]	231	99980	Enzymes with EC numbers,	09191	09190
D|1136176.5.peg.1168	1	1330218	1332602	+	2385	460	434	441	411	475	479	107	136	129	113	129	129	309.981	303.679	311.288	303.083	314.069	312.752	162.042	190.235	169.585	173.275	182.599	193.142	243.811	0.792702	0.069824	11.3529	7.18e-30	5.5e-29	HrpA-like helicase	NA	K03579	hrpB; ATP-dependent helicase HrpB [EC:3.6.4.13]	19	99980	Enzymes with EC numbers,	09191	09190
D|1136176.5.peg.1098	1	1242826	1243695	+	870	1507	1456	1429	1408	1565	1511	346	423	421	422	434	398	1015.52	1018.79	1008.69	1038.3	1034.78	986.573	523.988	591.687	553.453	647.097	614.327	595.896	802.425	0.791877	0.0484933	16.3296	6.07e-60	1.19e-58	COG0613%2C Predicted metal-dependent phosphoesterases (PHP family)	NA	K07053	E3.1.3.97; 3',5'-nucleoside bisphosphate phosphatase [EC:3.1.3.97]	200	99980	Enzymes with EC numbers,	09191	09190
D|1136176.5.peg.1539	1	1779614	1780897	-	1284	136	117	133	124	136	126	39	55	38	34	26	27	91.6465	81.8673	93.8805	91.441	89.923	82.2688	59.0622	76.9333	49.9553	52.1358	36.803	40.4251	70.5285	0.750136	0.134493	5.57752	2.44e-08	6.33e-08	L-ornithine 5-monooxygenase (EC 1.13.12.-)%2C PvdA of pyoverdin biosynthesis	KEGG_ENZYME:1.13.12.-	K10531	pvdA, SIDA; L-ornithine N5-monooxygenase [EC:1.14.13.195 1.14.13.196]	221	99980	Enzymes with EC numbers,	09191	09190
D|1136176.5.peg.926	1	1045320	1046258	+	939	846	741	755	822	844	824	249	271	201	283	186	192	570.095	518.493	532.93	606.165	558.051	538.012	377.089	379.071	264.237	433.953	263.283	287.467	444.071	0.73091	0.117669	6.21158	5.25e-10	1.51e-09	Glutathione S-transferase%2C omega (EC 2.5.1.18)	KEGG_ENZYME:2.5.1.18	K07393	ECM4, yqjG; glutathionyl-hydroquinone reductase [EC:1.8.5.7]	215	99980	Enzymes with EC numbers,	09191	09190
D|1136176.5.peg.3395	2	499373	500452	-	1080	65	65	56	82	83	73	13	33	12	19	26	22	43.8016	45.4818	39.5286	60.469	54.8795	47.6637	19.6874	46.16	15.7754	29.1347	36.803	32.939	39.3603	0.693727	0.197034	3.52085	0.00043	0.00076	NADH oxidoreductase hcr (EC 1.-.-.-)	KEGG_ENZYME:1.-.-.-	K11933	hcr; NADH oxidoreductase Hcr [EC:1.-.-.-]	116	99980	Enzymes with EC numbers,	09191	09190
D|1136176.5.peg.2262	1	2580581	2581807	-	1227	4882.5	4518.5	4420.5	4297.5	4940.5	4808	1347.5	1347	1667	1123	1483	1498.5	3289.84	3161.34	3119.94	3168.73	3266.32	3139.27	2039.92	1884.17	2191.46	1722.01	2099.19	2242.84	2610.42	0.652218	0.0604124	10.7961	3.59e-27	2.49e-26	Na(+)-translocating NADH-quinone reductase subunit F (EC 1.6.5.-)	KEGG_ENZYME:1.6.5.-	K00351	nqrF; Na+-transporting NADH:ubiquinone oxidoreductase subunit F [EC:7.2.1.1]	333	99980	Enzymes with EC numbers,	09191	09190
D|1136176.5.peg.3897	2	1060043	1060603	+	561	285	261	261	245	291	286	73	96	101	77	94	73	192.053	182.627	184.232	180.67	192.409	186.737	110.552	134.284	132.776	118.072	133.057	109.297	154.731	0.596196	0.0848217	7.02881	2.08e-12	6.94e-12	N-acetylglutamate synthase (EC 2.3.1.1)	KEGG_ENZYME:2.3.1.1	K00661	maa; maltose O-acetyltransferase [EC:2.3.1.79]	91	99980	Enzymes with EC numbers,	09191	09190
D|1136176.5.peg.2263	1	2581837	2582433	-	597	2915	2822	2762	2590.5	2825.5	3027	885	865.5	1053.5	711	998	849.5	1964.33	1974.61	1949.61	1909.94	1867.88	1976.41	1340.26	1209.95	1384.29	1090.25	1412.67	1271.14	1612.61	0.594159	0.0584234	10.1699	2.7e-24	1.67e-23	Na(+)-translocating NADH-quinone reductase subunit E (EC 1.6.5.-)	KEGG_ENZYME:1.6.5.-	K00350	nqrE; Na+-transporting NADH:ubiquinone oxidoreductase subunit E [EC:7.2.1.1]	250	99980	Enzymes with EC numbers,	09191	09190
D|1136176.5.peg.2264	1	2582441	2583073	-	633	2780	2609	2628	2397.5	2798	2821.5	846.5	785	1021.5	707	866.5	847	1873.36	1825.57	1855.02	1767.61	1850.03	1841.91	1281.2	1098.05	1342.22	1084.12	1225.82	1268.15	1526.09	0.592907	0.0536747	11.0463	2.28e-28	1.66e-27	Na(+)-translocating NADH-quinone reductase subunit D (EC 1.6.5.-)	KEGG_ENZYME:1.6.5.-	K00349	nqrD; Na+-transporting NADH:ubiquinone oxidoreductase subunit D [EC:7.2.1.1]	235	99980	Enzymes with EC numbers,	09191	09190
D|1136176.5.peg.1965	1	2256369	2258720	-	2352	1350	1020	1050	1033	1097	1074	356	359	359	366	326	352	909.726	713.715	741.162	761.763	725.334	701.244	539.132	502.165	471.947	561.226	461.453	527.023	634.657	0.5732	0.0788217	7.27211	3.54e-13	1.25e-12	Lead%2C cadmium%2C zinc and mercury transporting ATPase (EC 3.6.3.3) (EC 3.6.3.5)%3B Copper-translocating P-type ATPase (EC 3.6.3.4)	KEGG_ENZYME:3.6.3.3,KEGG_ENZYME:3.6.3.5,KEGG_ENZYME:3.6.3.4	K01534	zntA; Zn2+/Cd2+-exporting ATPase [EC:7.2.2.12 7.2.2.21]	350	99980	Enzymes with EC numbers,	09191	09190
D|1136176.5.peg.538	1	616363	617193	+	831	416	447.5	506.5	443	480.5	529.5	130	149	170	152.5	160.5	152	280.33	312.775	357.169	326.68	317.375	345.398	196.874	208.419	223.484	233.077	226.48	227.578	271.304	0.559496	0.079453	7.04185	1.9e-12	6.34e-12	Putative deoxyribonuclease YjjV	NA	K03424	tatD; TatD DNase family protein [EC:3.1.21.-]	133	99980	Enzymes with EC numbers,	09191	09190
D|1136176.5.peg.2435	1	2783071	2783892	-	822	333.5	323.5	297.5	283.5	310	319	103	93	135.5	84.5	101.5	110	224.399	226.01	209.643	208.692	204.971	208.284	155.985	130.087	177.473	128.806	142.965	164.695	181.834	0.507682	0.0845778	6.00254	1.94e-09	5.42e-09	Prolipoprotein diacylglyceryl transferase (EC 2.4.99.-)	KEGG_ENZYME:2.4.99.-	K13292	lgt, umpA; phosphatidylglycerol---prolipoprotein diacylglyceryl transferase [EC:2.5.1.145]	188	99980	Enzymes with EC numbers,	09191	09190
D|1136176.5.peg.2020	1	2309172	2309729	+	558	200	183	196	192	199	194	72	73	63	64	64	58	134.774	128.049	138.35	141.586	131.578	126.668	109.038	102.111	82.8207	98.1379	90.592	86.8391	114.212	0.494222	0.0972264	5.0832	3.71e-07	8.83e-07	Alkyl hydroperoxide reductase protein C (EC 1.6.4.-)	KEGG_ENZYME:1.6.4.-	K24119	ahpC; NADH-dependent peroxiredoxin subunit C [EC:1.11.1.26]	167	99980	Enzymes with EC numbers,	09191	09190
D|1136176.5.peg.961	1	1085296	1086063	+	768	742.5	759	709	662.5	767.5	792.5	232.5	241.5	306	232	292	217	500.013	531.088	500.461	488.177	507.139	517.118	351.344	337.108	402.272	355.75	413.326	324.898	435.724	0.476403	0.0626011	7.61013	2.74e-14	1.04e-13	Putative deoxyribonuclease YcfH	NA	K03424	tatD; TatD DNase family protein [EC:3.1.21.-]	205	99980	Enzymes with EC numbers,	09191	09190
D|1136176.5.peg.1643	1	1911282	1911779	-	498	163.5	158	151.5	156	160	186	38	61.5	74.5	57.5	58.5	47	109.841	110.556	106.586	115.039	105.792	121.444	57.5478	85.326	97.2815	87.4041	82.099	70.3696	95.7738	0.473041	0.109564	4.31749	1.58e-05	3.23e-05	COG1451: Predicted metal-dependent hydrolase	NA	K07043	upp; UTP pyrophosphatase [EC:3.6.1.-]	104	99980	Enzymes with EC numbers,	09191	09190
D|1136176.5.peg.2265	1	2583073	2583840	-	768	3590.5	3546	3459.5	3180	3626	3678	1147	1241	1458	918.5	1331.5	1235	2419.2	2481.21	2441.6	2345.02	2397.5	2401.47	1737.03	1735.9	1916.71	1407.67	1884.03	1849.07	2084.7	0.459499	0.0660592	6.95587	3.5e-12	1.15e-11	Na(+)-translocating NADH-quinone reductase subunit C (EC 1.6.5.-)	KEGG_ENZYME:1.6.5.-	K00348	nqrC; Na+-transporting NADH:ubiquinone oxidoreductase subunit C [EC:7.2.1.1]	241	99980	Enzymes with EC numbers,	09191	09190
D|1136176.5.peg.3941	2	1102447	1103223	+	777	535	486	476.5	495	536.5	519.5	202	193	159.5	192	177	144	360.521	340.064	335.993	365.027	354.402	338.869	305.912	269.966	209.024	294.414	250.543	215.6	303.361	0.441783	0.0859771	5.13839	2.77e-07	6.65e-07	Hydroxypyruvate isomerase (EC 5.3.1.22)	KEGG_ENZYME:5.3.1.22	K22131	otnI; 2-dehydrotetronate isomerase [EC:5.3.1.35]	209	99980	Enzymes with EC numbers,	09191	09190
D|1136176.5.peg.1005	1	1141839	1142549	-	711	738	659.5	668.5	679.5	700	696	243	244	267.5	223.5	253.5	253	497.317	461.116	471.52	500.713	462.839	454.437	368.003	341.304	351.002	341.949	358.121	378.798	415.593	0.412973	0.056904	7.25736	3.95e-13	1.39e-12	Leucyl/phenylalanyl-tRNA--protein transferase (EC 2.3.2.6)	KEGG_ENZYME:2.3.2.6	K00684	aat; leucyl/phenylalanyl-tRNA---protein transferase [EC:2.3.2.6]	133	99980	Enzymes with EC numbers,	09191	09190
D|1136176.5.peg.1746	1	2016685	2020800	-	4116	2472	2413	2336	2151	2441	2458	745	887	1051	734	1001	847	1665.81	1688.43	1648.91	1586.21	1613.98	1604.89	1128.24	1240.72	1381.66	1125.52	1416.92	1268.15	1447.45	0.374287	0.0600658	6.23129	4.63e-10	1.33e-09	ATP-dependent RNA helicase HrpA (EC 3.6.4.13)	KEGG_ENZYME:3.6.4.13	K03578	hrpA; ATP-dependent helicase HrpA [EC:3.6.4.13]	906	99980	Enzymes with EC numbers,	09191	09190
D|1136176.5.peg.706	1	796410	796760	-	351	768.5	785.5	703	701	759	767.5	241.5	286	311	216	326.5	294.5	517.533	549.281	496.225	516.937	501.849	500.795	364.974	400.053	408.845	331.215	461.453	440.184	457.445	0.355311	0.071396	4.97663	6.47e-07	1.51e-06	Arsenate reductase (EC 1.20.4.1)	KEGG_ENZYME:1.20.4.1	K00537	arsC; arsenate reductase (glutaredoxin) [EC:1.20.4.1]	77	99980	Enzymes with EC numbers,	09191	09190
D|1136176.5.peg.2761	1	3182105	3183184	-	1080	2876	2848	2868	2679	2900.5	2920	907	1178.5	1131.5	1030	1118.5	1014.5	1938.05	1992.8	2024.43	1975.57	1917.47	1906.55	1373.57	1647.77	1486.83	1579.41	1582.53	1518.19	1745.26	0.354968	0.0437065	8.12164	4.6e-16	1.94e-15	Poly(glycerol-phosphate) alpha-glucosyltransferase (EC 2.4.1.52)	KEGG_ENZYME:2.4.1.52	K00754	bshA; L-malate glycosyltransferase [EC:2.4.1.-]	137	99980	Enzymes with EC numbers,	09191	09190
D|1136176.5.peg.3119	2	209500	209898	-	399	14	19	15	19	17	20	4	9	8	4	6	8	9.4342	13.2947	10.588	14.0111	11.2404	13.0585	6.05766	12.5891	10.5169	6.13362	8.493	11.9778	10.6163	0.34838	0.293175	1.1883	0.234715	0.277379	Endoribonuclease L-PSP	NA	K09022	ridA, tdcF, RIDA; 2-iminobutanoate/2-iminopropanoate deaminase [EC:3.5.99.10]	110	99980	Enzymes with EC numbers,	09191	09190
D|1136176.5.peg.1206	1	1402792	1404966	+	2175	2768.5	2630.5	2637	2881.5	2927.5	2966	963	1130	1066	1061.5	1104.5	1026.5	1865.28	1840.27	1861.37	2124.53	1935.33	1936.58	1458.38	1580.63	1401.38	1626.94	1562.71	1536.15	1727.46	0.335468	0.0510183	6.57544	4.85e-11	1.49e-10	poly(beta-D-mannuronate) lyase (EC 4.2.2.3)	KEGG_ENZYME:4.2.2.3	K20525	alg17C; oligo-alginate lyase [EC:4.2.2.26]	386	99980	Enzymes with EC numbers,	09191	09190
D|1136176.5.peg.382	1	427445	428176	-	732	252	232	256	238	250	217	94	102	94	84	91	88	169.816	162.335	180.702	175.508	165.3	141.685	142.355	142.676	123.574	128.806	128.81	131.756	149.444	0.318356	0.0905834	3.5145	0.000441	0.000777	Endonuclease I precursor (EC 3.1.21.1) @ Extracellular deoxyribonuclease Dns (EC 3.1.21.-)	KEGG_ENZYME:3.1.21.1,KEGG_ENZYME:3.1.21.-	K01150	endA; deoxyribonuclease I [EC:3.1.21.1]	136	99980	Enzymes with EC numbers,	09191	09190
D|1136176.5.peg.2983	2	31663	33759	+	2097	252	229	255	193	246	285	79	109	86	81	118	87	169.816	160.236	179.996	142.323	162.655	186.084	119.639	152.468	113.057	124.206	167.029	130.259	150.647	0.312019	0.105456	2.95877	0.00308873	0.0048868	para-nitrobenzyl esterase (intracellular esterase B)	NA	K03929	pnbA; para-nitrobenzyl esterase [EC:3.1.1.-]	13	99980	Enzymes with EC numbers,	09191	09190
D|1136176.5.peg.606	1	694473	695792	+	1320	2158	2056.5	2178	2060.5	2280	2287	791	867	911	726	844	882.5	1454.21	1438.63	1537.38	1519.1	1507.53	1493.24	1197.9	1212.75	1197.61	1113.25	1194.68	1320.55	1348.9	0.306396	0.041686	7.35009	1.98e-13	7.07e-13	Fermentation/respiration switch protein	NA	K11750	frsA; esterase FrsA [EC:3.1.-.-]	181	99980	Enzymes with EC numbers,	09191	09190
D|1136176.5.peg.2596	1	2977012	2977824	-	813	1127.5	993	998.5	1095	1065.5	1097	396.5	397.5	427.5	412.5	458	384.5	759.453	694.823	704.456	807.483	704.176	716.261	599.708	555.319	561.34	631.763	648.299	574.935	663.168	0.297113	0.0595007	4.99344	5.93e-07	1.39e-06	D003879: Predicted amidohydrolase / Aliphatic amidase AmiE (EC 3.5.1.4)	KEGG_ENZYME:3.5.1.4	K11206	NIT1, ybeM; deaminated glutathione amidase [EC:3.5.1.128]	115	99980	Enzymes with EC numbers,	09191	09190
D|1136176.5.peg.4550	3	48515	49294	-	780	61	65.5	66	56.5	60	68	21	24.5	28.5	27.5	24	22.5	41.1062	45.4818	46.5873	41.2959	39.6719	44.399	31.8027	33.5709	36.8092	41.4019	33.972	32.939	39.0865	0.296402	0.154668	1.91638	0.0553172	0.0734714	D016157: Similar to nicotianamine synthase	NA	K23120	cntL; histidine 2-aminobutanoyltransferase [EC:2.5.1.152 2.5.1.-]	59	99980	Enzymes with EC numbers,	09191	09190
D|1136176.5.peg.4180	2	1396641	1397666	+	1026	2446	2317	2257	2168	2495	2365	921	885	926	941	855	943	1648.29	1621.25	1593.14	1598.74	1649.69	1544.17	1394.78	1237.93	1217.33	1442.93	1210.25	1411.88	1464.2	0.288016	0.053022	5.432	5.57e-08	1.41e-07	Bifunctional protein: zinc-containing alcohol dehydrogenase%3B quinone oxidoreductase ( NADPH:quinone reductase) (EC 1.1.1.-)%3B Similar to arginate lyase	KEGG_ENZYME:1.1.1.-	K00344	qor, CRYZ; NADPH:quinone reductase [EC:1.6.5.5]	186	99980	Enzymes with EC numbers,	09191	09190
D|1136176.5.peg.714	1	803611	805083	-	1473	1130	1122	1002	981	1115	1122	391	454	496	388	417	402	761.475	785.087	707.28	723.416	737.236	732.584	592.136	635.049	652.049	594.961	590.263	601.885	676.118	0.277194	0.0483638	5.73145	9.96e-09	2.66e-08	Retron-type RNA-directed DNA polymerase (EC 2.7.7.49)	KEGG_ENZYME:2.7.7.49	K00986	ltrA; RNA-directed DNA polymerase [EC:2.7.7.49]	236	99980	Enzymes with EC numbers,	09191	09190
D|1136176.5.peg.904	1	1016650	1017243	-	594	232	213.5	240.5	218	197	216	79.5	78.5	109	83.5	86	86	156.338	149.04	169.408	160.759	130.256	141.032	119.639	109.105	143.293	127.273	121.733	128.761	138.053	0.271161	0.0974029	2.78392	0.00537071	0.00824978	Electron transport complex protein RnfB	NA	K03616	rnfB; Na+-translocating ferredoxin:NAD+ oxidoreductase subunit B [EC:7.2.1.2]	124	99980	Enzymes with EC numbers,	09191	09190
D|1136176.5.peg.2910	1	3353977	3354489	+	513	855	818	824	762	845	886	328	325	363	324	331	319	576.16	572.371	581.635	561.92	558.713	578.493	496.728	454.606	477.205	496.823	468.53	477.615	525.067	0.257255	0.0479054	5.37006	7.87e-08	1.96e-07	Peptide deformylase (EC 3.5.1.88)	KEGG_ENZYME:3.5.1.88	K01462	PDF, def; peptide deformylase [EC:3.5.1.88]	170	99980	Enzymes with EC numbers,	09191	09190
D|1136176.5.peg.3667	2	814477	815343	+	867	145	133	140	137	143	145	69	69	49	41	51	59	97.7113	93.0628	98.8215	101.028	94.5513	94.6744	104.495	96.5163	64.4161	62.8696	72.1905	88.3363	89.056	0.249142	0.114865	2.169	0.030083	0.0417475	Pirin-related protein	NA	K06911	PIR; quercetin 2,3-dioxygenase [EC:1.13.11.24]	172	99980	Enzymes with EC numbers,	09191	09190
D|1136176.5.peg.533	1	612860	613363	+	504	151.5	171	147	134	145.5	141.5	79	46.5	56.5	52.5	73	54.5	101.755	119.652	103.763	98.8153	95.8737	92.0627	119.639	64.3442	73.6184	79.737	103.331	80.8502	94.4534	0.233889	0.130629	1.79048	0.0733764	0.0957585	D002208: Acetyltransferase (EC 2.3.1.-)	KEGG_ENZYME:2.3.1.-	K03824	yhbS; putative acetyltransferase [EC:2.3.1.-]	88	99980	Enzymes with EC numbers,	09191	09190
D|1136176.5.peg.4191	2	1408672	1410240	-	1569	1163	1168	1169	1013	1181	1215	510	498	497	499	397	417	783.712	817.274	825.16	747.014	780.875	793.306	772.352	696.596	653.363	765.169	561.953	624.343	735.093	0.221876	0.0732	3.03109	0.00243673	0.00391259	D00949965: hypothetical protein	NA	K03929	pnbA; para-nitrobenzyl esterase [EC:3.1.1.-]	144	99980	Enzymes with EC numbers,	09191	09190
D|1136176.5.peg.2266	1	2583830	2585074	-	1245	4136.5	3957	3931.5	3624	4232	4021.5	1452.5	1727	1904	1267.5	1826	1666	2787.13	2768.79	2774.77	2672.44	2798.19	2625.42	2198.93	2415.71	2503.03	1942.82	2584.7	2494.38	2547.19	0.21584	0.0652455	3.30812	0.000939	0.0015959	Na(+)-translocating NADH-quinone reductase subunit B (EC 1.6.5.-)	KEGG_ENZYME:1.6.5.-	K00347	nqrB; Na+-transporting NADH:ubiquinone oxidoreductase subunit B [EC:7.2.1.1]	431	99980	Enzymes with EC numbers,	09191	09190
D|1136176.5.peg.1192	1	1358226	1358543	+	318	38	39	34	26	28	33	12	14	11	16	15	14	25.6071	27.2891	23.9995	19.1731	18.5136	21.5466	18.173	19.583	14.4608	24.5345	21.2325	20.9612	21.2562	0.202139	0.209955	0.962775	0.335661	0.383777	RNA-binding domain protein	NA	K09900	E3.5.1.135; N4-acetylcytidine amidohydrolase [EC:3.5.1.135]	57	99980	Enzymes with EC numbers,	09191	09190
D|1136176.5.peg.1040	1	1185705	1186160	+	456	696.5	651	604	619	714.5	692	257	285	288.5	306.5	270.5	242.5	469.014	455.518	426.344	456.468	472.096	451.825	389.205	398.654	378.609	469.222	382.185	362.329	425.956	0.200278	0.0624737	3.20581	0.00134685	0.00223929	4-hydroxybenzoyl-CoA thioesterase family active site	NA	K07107	ybgC; acyl-CoA thioester hydrolase [EC:3.1.2.-]	75	99980	Enzymes with EC numbers,	09191	09190
D|1136176.5.peg.307	1	345208	345837	-	630	1140	1091	1146	1126	1140	1194	427	537	502	432	461	511	768.213	763.395	808.925	830.343	753.766	779.595	646.655	751.149	659.936	662.431	652.545	765.082	736.836	0.184806	0.055139	3.35163	0.000803	0.00137813	Peptide methionine sulfoxide reductase MsrA (EC 1.8.4.11)	KEGG_ENZYME:1.8.4.11	K07304	msrA; peptide-methionine (S)-S-oxide reductase [EC:1.8.4.11]	149	99980	Enzymes with EC numbers,	09191	09190
D|1136176.5.peg.3084	2	168014	168997	-	984	1523.5	1316	1403.5	1402.5	1462.5	1485	510	627.5	687.5	444	729.5	643.5	1026.31	920.832	990.333	1033.87	966.672	969.597	772.352	877.04	903.14	680.832	1031.9	962.716	927.966	0.175508	0.0878825	1.99708	0.0458169	0.0618261	MoxR-like ATPase in aerotolerance operon	NA	K03924	moxR; MoxR-like ATPase [EC:3.6.3.-]	192	99980	Enzymes with EC numbers,	09191	09190
D|1136176.5.peg.3611	2	740529	741893	+	1365	329	321	306	322	357	343	138	143	158	137	139	122	221.704	224.61	215.996	237.452	236.048	223.954	208.989	200.027	207.709	210.076	196.754	182.662	213.832	0.172427	0.07133	2.41732	0.0156354	0.0226953	Guanine deaminase (EC 3.5.4.3)%3B Hydroxydechloroatrazine ethylaminohydrolase (EC 3.5.99.3)	KEGG_ENZYME:3.5.4.3,KEGG_ENZYME:3.5.99.3	K18456	E3.5.4.32; 8-oxoguanine deaminase [EC:3.5.4.32]	420	99980	Enzymes with EC numbers,	09191	09190
D|1136176.5.peg.1207	1	1404969	1407122	+	2154	6357.5	6017.5	6209	6800.5	6669.5	6861	2764	2755	2953	2720.5	2731.5	2697.5	4283.8	4210.22	4382.74	5014.51	4409.53	4479.73	4185.84	3853.66	3882.06	4170.86	3865.73	4038.02	4231.39	0.158525	0.0486074	3.26134	0.00110889	0.00186705	poly(beta-D-mannuronate) lyase (EC 4.2.2.3)	KEGG_ENZYME:4.2.2.3	K20525	alg17C; oligo-alginate lyase [EC:4.2.2.26]	429	99980	Enzymes with EC numbers,	09191	09190
D|1136176.5.peg.3790	2	936753	937241	-	489	3901	3762	3893	3720	4115	4044	1565	1521	1940	1841	1689	1738	2628.77	2632.35	2747.94	2743.23	2720.83	2640.44	2370.06	2127.56	2550.35	2823	2390.78	2602.18	2581.46	0.116711	0.0600958	1.94208	0.0521272	0.0695929	Uncharacterized domain COG3236 / GTP cyclohydrolase II (EC 3.5.4.25)	KEGG_ENZYME:3.5.4.25	K09935	ybiA; N-glycosidase YbiA [EC:3.2.2.-]	41	99980	Enzymes with EC numbers,	09191	09190
D|1136176.5.peg.3510	2	629971	630957	-	987	770	773	697	653	753	701	315	312	362	300	287	347	518.881	540.884	491.99	481.54	497.882	457.702	477.041	436.422	475.89	460.021	406.248	519.537	480.337	0.107654	0.0660463	1.62998	0.103105	0.131379	L-alanine-DL-glutamate epimerase	NA	K19802	ycjG, ykfB; L-Ala-D/L-Glu epimerase [EC:5.1.1.20]	159	99980	Enzymes with EC numbers,	09191	09190
D|1136176.5.peg.745	1	836952	837875	+	924	874	837	815	781	835	878	320	329	448	333	405	394	588.964	585.666	575.283	575.931	552.101	573.27	484.613	460.201	588.947	510.624	573.277	589.907	554.899	0.104589	0.064785	1.6144	0.10644	0.135331	Predicted dye-decolorizing peroxidase (DyP)%2C YfeX-like subgroup	NA	K07223	yfeX; porphyrinogen peroxidase [EC:1.11.1.-]	204	99980	Enzymes with EC numbers,	09191	09190
D|1136176.5.peg.4380	2	1618927	1621566	+	2640	493	478	478	441	486	498	215	244	230	250	187	194	332.219	334.466	337.405	325.205	321.342	325.158	325.599	341.304	302.361	383.351	264.698	290.462	323.631	0.0523134	0.0748559	0.698855	0.484643	0.533186	Alpha-mannosidase (EC 3.2.1.24)	KEGG_ENZYME:3.2.1.24	K15524	mngB; mannosylglycerate hydrolase [EC:3.2.1.170]	621	99980	Enzymes with EC numbers,	09191	09190
D|1136176.5.peg.789	1	881975	882751	-	777	160	174	166	150	170	167	50	87	92	80	68	82	107.819	121.751	117.174	110.614	112.404	109.039	75.7208	121.695	120.945	122.672	96.254	122.772	111.572	0.0376688	0.105049	0.358583	0.719907	0.758812	Esterase ybfF (EC 3.1.-.-)	KEGG_ENZYME:3.1.-.-	K01175	ybfF; esterase [EC:3.1.-.-]	124	99980	Enzymes with EC numbers,	09191	09190
D|1136176.5.peg.1004	1	1141141	1141839	-	699	723	719.5	685.5	625.5	726	740	327	323	362.5	325.5	332.5	318	487.209	503.099	483.52	460.892	480.03	483.166	495.214	451.808	475.89	498.356	469.946	476.118	480.437	0.0166709	0.0503516	0.33109	0.740576	0.775492	Arginine-tRNA-protein transferase (EC 2.3.2.8)	KEGG_ENZYME:2.3.2.8	K21420	bpt; leucyl-tRNA---protein transferase [EC:2.3.2.29]	125	99980	Enzymes with EC numbers,	09191	09190
D|1136176.5.peg.4271	2	1499216	1500307	-	1092	4980	4836	4812	4866	5345	5276	2094	2403	2598	2455	2478	2200	3355.88	3383.85	3396.64	3588.32	3534.1	3444.84	3171.19	3361.29	3415.37	3764.51	3507.61	3293.9	3434.79	0.0133053	0.042583	0.312456	0.754694	0.788852	PQQ-dependent oxidoreductase%2C gdhB family	NA	K21430	yliI; aldose sugar dehydrogenase [EC:1.1.5.-]	226	99980	Enzymes with EC numbers,	09191	09190
D|1136176.5.peg.728	1	822030	822494	-	465	536	538	517	472	542	586	213	267	298	247	237	246	361.195	376.45	364.934	348.066	358.369	382.615	322.57	373.476	391.755	378.751	335.473	368.317	363.498	0.0131612	0.0607069	0.2168	0.828364	0.852417	Thiol peroxidase%2C Bcp-type (EC 1.11.1.15)	KEGG_ENZYME:1.11.1.15	K03564	BCP, PRXQ, DOT5; thioredoxin-dependent peroxiredoxin [EC:1.11.1.24]	104	99980	Enzymes with EC numbers,	09191	09190
D|1136176.5.peg.4549	3	47244	48518	-	1275	633.5	641	679	717.5	744	698	329	354.5	354	316.5	295.5	310	426.561	448.521	479.284	528.735	491.931	455.743	498.243	495.171	465.373	484.556	417.572	464.14	471.319	0.00287416	0.0677141	0.0424456	0.966143	0.972785	D018700: hypothetical protein	NA	K23122	cntM; staphylopine/pseudopaline/yersinopine synthase [EC:1.5.1.52 1.5.1.-]	143	99980	Enzymes with EC numbers,	09191	09190
D|1136176.5.peg.479	1	536405	538903	+	2499	429.5	470.5	466.5	418	465	475.5	218.5	219	236.5	176	221	227	289.091	328.869	328.935	308.245	307.457	310.14	330.143	306.334	310.249	269.879	312.825	339.87	311.836	0.00209241	0.0660972	0.0316566	0.974746	0.979388	ATP-dependent helicase HrpB	NA	K03579	hrpB; ATP-dependent helicase HrpB [EC:3.6.4.13]	382	99980	Enzymes with EC numbers,	09191	09190
D|1136176.5.peg.3171	2	265943	266800	-	858	4099	3838	3792	3575	4080	4086	1731	1691	2208	1850	1945	1790	2762.2	2685.53	2676.65	2636.3	2697.69	2667.86	2621.45	2365.35	2902.67	2836.8	2753.15	2680.03	2690.47	-0.00300464	0.0471856	-0.063677	0.949227	0.959354	Glutathione S-transferase (EC 2.5.1.18)	KEGG_ENZYME:2.5.1.18	K11209	yghU, yfcG; GSH-dependent disulfide-bond oxidoreductase [EC:1.8.4.-]	194	99980	Enzymes with EC numbers,	09191	09190
D|1136176.5.peg.2526	1	2894068	2896917	-	2850	1496	1446	1405	1377	1483	1542	670	754	761	592	815	614	1008.11	1011.8	991.745	1015.44	980.557	1006.81	1014.66	1054.69	1000.42	907.775	1153.63	919.297	1005.41	-0.00956402	0.0555036	-0.172314	0.863191	0.883363	Glutamate-ammonia-ligase adenylyltransferase (EC 2.7.7.42)	KEGG_ENZYME:2.7.7.42	K00982	glnE; [glutamine synthetase] adenylyltransferase / [glutamine synthetase]-adenylyl-L-tyrosine phosphorylase [EC:2.7.7.42 2.7.7.89]	578	99980	Enzymes with EC numbers,	09191	09190
D|1136176.5.peg.1399	1	1645880	1648252	+	2373	361	352.5	309.5	313	327.5	353.5	163	172	162	154.5	172	147	243.268	246.302	218.113	230.815	216.212	230.483	246.85	240.591	212.968	236.144	243.466	220.092	232.109	-0.0142923	0.0713443	-0.200329	0.841223	0.864311	Type cbb3 cytochrome oxidase biogenesis protein CcoI%3B Copper-translocating P-type ATPase (EC 3.6.3.4)	KEGG_ENZYME:3.6.3.4	K01533	copB; P-type Cu2+ transporter [EC:7.2.2.9]	463	99980	Enzymes with EC numbers,	09191	09190
D|1136176.5.peg.3473	2	584109	584942	-	834	610	582	595	582	641	629	266	324	296	284	321	268	411.062	407.237	419.992	429.183	423.828	410.691	402.834	453.207	389.126	435.487	454.375	401.256	419.857	-0.0196602	0.0555394	-0.353988	0.723348	0.761249	D137360: hypothetical protein	NA	K09773	ppsR; [pyruvate, water dikinase]-phosphate phosphotransferase / [pyruvate, water dikinase] kinase [EC:2.7.4.28 2.7.11.33]	226	99980	Enzymes with EC numbers,	09191	09190
D|1136176.5.peg.3948	2	1110698	1111552	-	855	2841	2765	2818	2602	3045	2904	1374	1473	1478	1498	1438	1380	1914.47	1934.73	1989.14	1918.79	2013.35	1896.1	2080.81	2060.41	1943	2297.04	2035.49	2066.17	2012.46	-0.0967385	0.041061	-2.35597	0.0184745	0.0264687	Ferredoxin--NADP(+) reductase (EC 1.18.1.2)	KEGG_ENZYME:1.18.1.2	K00528	fpr; ferredoxin/flavodoxin---NADP+ reductase [EC:1.18.1.2 1.19.1.1]	109	99980	Enzymes with EC numbers,	09191	09190
D|1136176.5.peg.3096	2	181819	182298	-	480	256	212	240	234	235	231	113	114	141	120	144	97	172.511	148.341	169.408	172.558	155.382	150.826	171.129	159.462	185.361	184.009	203.832	145.231	168.171	-0.116836	0.0889745	-1.31314	0.189136	0.228757	putative acetyltransferase [EC:2.3.1.-] [KO:K03830]	KEGG_ENZYME:2.3.1.-	K03830	yafP; putative acetyltransferase [EC:2.3.1.-]	79	99980	Enzymes with EC numbers,	09191	09190
D|1136176.5.peg.4517	3	19518	20795	-	1278	159	191	196	187	202	194	113	89	89	97	105	90	107.146	133.647	138.35	137.899	133.562	126.668	171.129	124.492	117.001	148.74	148.627	134.75	135.168	-0.116848	0.102863	-1.13596	0.255974	0.299983	D018700: hypothetical protein	NA	K23122	cntM; staphylopine/pseudopaline/yersinopine synthase [EC:1.5.1.52 1.5.1.-]	107	99980	Enzymes with EC numbers,	09191	09190
D|1136176.5.peg.4218	2	1437155	1437829	-	675	111	101	108	104	106	130	57	61	75	48	52	52	74.7997	70.6718	76.2338	76.6925	70.087	84.8805	86.3217	85.326	98.5961	73.6034	73.606	77.8557	79.0562	-0.13162	0.112427	-1.17072	0.241713	0.285142	Glutathione S-transferase (EC 2.5.1.18)	KEGG_ENZYME:2.5.1.18	K11209	yghU, yfcG; GSH-dependent disulfide-bond oxidoreductase [EC:1.8.4.-]	155	99980	Enzymes with EC numbers,	09191	09190
D|1136176.5.peg.2733	1	3152661	3153827	-	1167	139.5	132.5	120.5	113.5	119.5	144.5	52	78	86	53.5	66	69	93.6681	92.3631	84.7042	83.3293	78.6826	94.0215	78.7496	109.105	113.057	81.2704	93.423	103.309	92.1402	-0.141647	0.109503	-1.29355	0.195822	0.236351	CDP-glycerol:poly(glycerophosphate) glycerophosphotransferase (EC 2.7.8.12)	KEGG_ENZYME:2.7.8.12	K09809	tagF; CDP-glycerol glycerophosphotransferase [EC:2.7.8.12]	103	99980	Enzymes with EC numbers,	09191	09190
D|1136176.5.peg.3697	2	844321	845469	+	1149	1128.5	1054	1038.5	1020	1107	1165.5	628.5	537.5	639.5	582	542	510	760.127	737.506	732.691	752.176	731.946	760.66	951.053	751.149	840.039	892.441	767.201	763.585	786.714	-0.149072	0.0601665	-2.47766	0.0132249	0.0193781	Nitric oxide reductase FlRd-NAD(+) reductase (EC 1.18.1.-)	KEGG_ENZYME:1.18.1.-	K12265	norW; nitric oxide reductase FlRd-NAD(+) reductase [EC:1.18.1.-]	153	99980	Enzymes with EC numbers,	09191	09190
D|1136176.5.peg.3963	2	1129708	1130769	-	1062	1995	1806.5	1809.5	1760.5	1982	1858.5	925	1008.5	1082	965.5	944.5	1022.5	1344.37	1263.7	1276.92	1297.87	1310.49	1213.14	1400.83	1409.98	1422.41	1479.74	1336.23	1530.16	1357.15	-0.154366	0.0424522	-3.63622	0.000277	0.0005	D002261: Cytochrome c family protein	NA	K19713	tsdA; thiosulfate dehydrogenase [EC:1.8.2.2]	169	99980	Enzymes with EC numbers,	09191	09190
D|1136176.5.peg.4451	2	1696079	1696546	+	468	83	68	75	64	64	75	39	34	57	33	37	29	55.9313	47.581	52.9401	47.1954	42.3167	48.9695	59.0622	47.5588	74.933	50.6023	52.3735	43.4195	51.9069	-0.160205	0.142122	-1.12724	0.259642	0.303591	Ribonucleotide reductase of class III (anaerobic)%2C activating protein (EC 1.97.1.4)	KEGG_ENZYME:1.97.1.4	K04068	nrdG; anaerobic ribonucleoside-triphosphate reductase activating protein [EC:1.97.1.4]	166	99980	Enzymes with EC numbers,	09191	09190
D|1136176.5.peg.3940	2	1101800	1102447	+	648	380.5	350	340	320	403.5	433.5	241.5	203.5	203	227	175.5	156	256.071	244.902	239.995	235.977	266.463	282.717	364.974	283.954	266.867	348.083	247.712	233.567	272.607	-0.190954	0.107534	-1.77576	0.0757731	0.0985262	Ribulose-5-phosphate 4-epimerase and related epimerases and aldolases	NA	K22130	otnC; 3-dehydro-4-phosphotetronate decarboxylase [EC:4.1.1.104]	221	99980	Enzymes with EC numbers,	09191	09190
D|1136176.5.peg.4294	2	1529582	1530007	+	426	64	57	60	46	67	70	29	30	38	34	33	38	43.1278	39.8841	42.3521	33.9217	44.3003	45.7049	43.918	41.9636	49.9553	52.1358	46.7115	56.8946	45.0725	-0.220714	0.143336	-1.53984	0.123599	0.155741	Probable acetyltransferase	NA	K03826	yiaC; putative acetyltransferase [EC:2.3.1.-]	75	99980	Enzymes with EC numbers,	09191	09190
D|1136176.5.peg.2730	1	3150313	3151482	-	1170	117	129.5	118	127.5	125.5	133	68	68	73.5	60.5	78	75	78.8429	90.264	83.2924	93.6533	82.6498	86.8393	102.98	95.1175	95.9668	92.0043	110.409	112.292	93.6926	-0.240401	0.102235	-2.35146	0.0186997	0.0267748	hypothetical protein	NA	K09809	tagF; CDP-glycerol glycerophosphotransferase [EC:2.7.8.12]	19	99980	Enzymes with EC numbers,	09191	09190
D|1136176.5.peg.1197	1	1363180	1364616	-	1437	7366.5	7102	6322.5	5852	6655.5	6945.5	4638.5	4318.5	3584.5	3901	3101	3130.5	4963.74	4969.42	4462.5	4315.43	4400.27	4534.58	7023.86	6039.96	4711.58	5981.81	4389.46	4686.32	5039.91	-0.247975	0.111049	-2.23304	0.0255465	0.0358052	Aldehyde dehydrogenase (EC 1.2.1.3)%3B Probable coniferyl aldehyde dehydrogenase (EC 1.2.1.68)	KEGG_ENZYME:1.2.1.3,KEGG_ENZYME:1.2.1.68	K00154	E1.2.1.68; coniferyl-aldehyde dehydrogenase [EC:1.2.1.68]	300	99980	Enzymes with EC numbers,	09191	09190
D|1136176.5.peg.39	1	49438	49935	-	498	532	540	553	478	501	520	327	294	278	284	299	298	358.5	377.849	390.345	352.49	331.26	339.522	495.214	411.243	365.463	435.487	423.234	446.173	393.898	-0.259404	0.0736946	-3.51998	0.000432	0.000762	Thiol peroxidase%2C Tpx-type (EC 1.11.1.15)	KEGG_ENZYME:1.11.1.15	K11065	tpx; thioredoxin-dependent peroxiredoxin [EC:1.11.1.24]	105	99980	Enzymes with EC numbers,	09191	09190
D|1136176.5.peg.2267	1	2585080	2586420	-	1341	6269.5	6338.5	6035.5	5362.5	6768	6318	3496.5	3625.5	4183	2931	4023	3329	4224.5	4434.83	4259.91	3954.09	4474.99	4125.19	5294.4	5070.6	5499.03	4494.41	5694.55	4984.26	4709.23	-0.28517	0.0589627	-4.83645	1.32e-06	2.98e-06	Na(+)-translocating NADH-quinone reductase subunit A (EC 1.6.5.-)	KEGG_ENZYME:1.6.5.-	K00346	nqrA; Na+-transporting NADH:ubiquinone oxidoreductase subunit A [EC:7.2.1.1]	335	99980	Enzymes with EC numbers,	09191	09190
D|1136176.5.peg.2737	1	3157706	3159595	-	1890	338.5	320	305	278.5	366	361	175	204.5	213	157	215	186.5	227.769	223.911	215.29	205.005	241.999	235.707	265.023	285.353	280.013	240.745	304.332	278.484	250.302	-0.293804	0.072126	-4.07348	4.63e-05	9.03e-05	CDP-glycerol:poly(glycerophosphate) glycerophosphotransferase (EC 2.7.8.12)	KEGG_ENZYME:2.7.8.12	K09809	tagF; CDP-glycerol glycerophosphotransferase [EC:2.7.8.12]	93	99980	Enzymes with EC numbers,	09191	09190
D|1136176.5.peg.4534	3	36002	36394	-	393	178	179	180	197	209	202	122	120	107	129	106	87	119.949	125.25	127.056	145.273	138.19	131.891	184.759	167.854	140.664	197.809	150.043	130.259	146.583	-0.299784	0.101492	-2.95377	0.00313922	0.00495993	Endoribonuclease L-PSP	NA	K09022	ridA, tdcF, RIDA; 2-iminobutanoate/2-iminopropanoate deaminase [EC:3.5.99.10]	71	99980	Enzymes with EC numbers,	09191	09190
D|1136176.5.peg.440	1	494591	495544	+	954	2731	2515.5	2571	2423.5	2732.5	2819.5	1545	1669	1643.5	1573	1507.5	1403	1840.34	1759.8	1814.79	1786.79	1806.39	1840.6	2339.77	2334.58	2159.91	2412.05	2133.16	2100.61	2027.4	-0.312761	0.041119	-7.60623	2.82e-14	1.07e-13	NADPH:quinone reductase	NA	K00344	qor, CRYZ; NADPH:quinone reductase [EC:1.6.5.5]	134	99980	Enzymes with EC numbers,	09191	09190
D|1136176.5.peg.866	1	971786	972184	+	399	1688	1775	1928	1774	1905	1966	1125	1214	1081	1133	1043	998	1137.49	1242	1360.91	1308.2	1259.58	1283.65	1703.72	1698.13	1421.1	1737.35	1476.37	1494.23	1426.89	-0.327738	0.0656448	-4.99259	5.96e-07	1.39e-06	Peptide methionine sulfoxide reductase MsrB (EC 1.8.4.12)	KEGG_ENZYME:1.8.4.12	K07305	msrB; peptide-methionine (R)-S-oxide reductase [EC:1.8.4.12]	76	99980	Enzymes with EC numbers,	09191	09190
D|1136176.5.peg.3301	2	395455	396927	-	1473	42938	39496	36507	34112	39402	40450	23955	24867	24065	23814	23047	21272	28934.7	27636.2	25769.1	25155.1	26052.5	26410.9	36277.8	34783.6	31636.2	36516.5	32623	31849	30303.7	-0.348612	0.052501	-6.6401	3.13e-11	9.81e-11	Retron-type RNA-directed DNA polymerase (EC 2.7.7.49)	KEGG_ENZYME:2.7.7.49	K00986	ltrA; RNA-directed DNA polymerase [EC:2.7.7.49]	246	99980	Enzymes with EC numbers,	09191	09190
D|1136176.5.peg.428	1	477218	477844	+	627	353	308	322.5	286.5	347.5	318	192	211.5	202.5	178.5	192	202	237.877	215.514	227.29	210.904	229.436	207.631	290.768	295.144	265.552	272.946	271.776	302.44	252.273	-0.352935	0.0681654	-5.17762	2.25e-07	5.43e-07	Protein-L-isoaspartate O-methyltransferase (EC 2.1.1.77)	KEGG_ENZYME:2.1.1.77	K00573	E2.1.1.77, pcm; protein-L-isoaspartate(D-aspartate) O-methyltransferase [EC:2.1.1.77]	144	99980	Enzymes with EC numbers,	09191	09190
D|1136176.5.peg.3302	2	397928	399163	-	1236	794.5	769.5	736.5	731.5	747.5	845.5	393.5	518.5	519	356.5	524.5	516.5	535.054	538.085	519.519	539.059	493.915	551.723	595.165	724.572	682.285	545.892	741.722	772.568	603.297	-0.355388	0.0807089	-4.40333	1.07e-05	2.21e-05	putative methylamine utilization protein MauG precursor	NA	K00428	E1.11.1.5; cytochrome c peroxidase [EC:1.11.1.5]	77	99980	Enzymes with EC numbers,	09191	09190
D|1136176.5.peg.2240	1	2556026	2557549	+	1524	1005	1034	1040	940	1096	1132	606	714	770	615	601	569	677.241	723.511	734.103	693.182	724.673	739.113	917.736	998.734	1012.25	943.044	850.715	851.921	822.186	-0.378036	0.0545095	-6.93524	4.06e-12	1.33e-11	Apolipoprotein N-acyltransferase (EC 2.3.1.-) / Copper homeostasis protein CutE	KEGG_ENZYME:2.3.1.-	K03820	lnt; apolipoprotein N-acyltransferase [EC:2.3.1.269]	257	99980	Enzymes with EC numbers,	09191	09190
D|1136176.5.peg.2847	1	3276611	3277375	+	765	276	282	294	292	300	303	189	182	185	204	156	167	185.988	197.321	207.525	215.329	198.359	197.837	286.224	254.579	243.204	312.815	220.818	250.037	230.836	-0.380441	0.0821461	-4.63127	3.63e-06	7.88e-06	Putative deoxyribonuclease similar to YcfH%2C type 2	NA	K03424	tatD; TatD DNase family protein [EC:3.1.21.-]	157	99980	Enzymes with EC numbers,	09191	09190
D|1136176.5.peg.350	1	383263	383757	-	495	462	450.5	437	459.5	519.5	530.5	261	308	327	295.5	320.5	274.5	311.329	314.874	308.464	338.479	343.162	346.051	395.262	430.827	429.879	452.354	452.96	410.24	377.823	-0.390116	0.060228	-6.47731	9.34e-11	2.82e-10	Histone acetyltransferase HPA2	NA	K03828	yjgM; putative acetyltransferase [EC:2.3.1.-]	76	99980	Enzymes with EC numbers,	09191	09190
D|1136176.5.peg.2417	1	2763061	2764197	+	1137	205	198	210	179	253	230	112	148	152	131	143	123	138.144	138.545	148.232	132	167.283	150.173	169.614	207.021	199.821	200.876	202.416	184.159	169.857	-0.412732	0.0850637	-4.85204	1.22e-06	2.77e-06	Anhydro-N-acetylmuramic acid kinase (EC 2.7.1.-)	KEGG_ENZYME:2.7.1.-	K09001	anmK; anhydro-N-acetylmuramic acid kinase [EC:2.7.1.170]	257	99980	Enzymes with EC numbers,	09191	09190
D|1136176.5.peg.1239	1	1451696	1452193	-	498	175	210	211	166	201	191	117	127	118	126	148	101	117.927	146.941	148.938	122.413	132.901	124.709	177.187	177.646	155.124	193.209	209.494	151.22	154.809	-0.421905	0.0990534	-4.25937	2.05e-05	4.15e-05	Peptide methionine sulfoxide reductase MsrA (EC 1.8.4.11)	KEGG_ENZYME:1.8.4.11	K07304	msrA; peptide-methionine (S)-S-oxide reductase [EC:1.8.4.11]	136	99980	Enzymes with EC numbers,	09191	09190
D|1136176.5.peg.3939	2	1100532	1101788	+	1257	919.5	853.5	894	856.5	974.5	939	609.5	631	595.5	639	528.5	511.5	619.288	596.862	631.046	631.238	644.007	613.098	922.279	882.635	782.196	979.845	747.384	765.082	734.58	-0.44231	0.069231	-6.3889	1.67e-10	4.97e-10	D00641944: hypothetical protein	NA	K21948	otnK; 3-dehydrotetronate 4-kinase [EC:2.7.1.217]	284	99980	Enzymes with EC numbers,	09191	09190
D|1136176.5.peg.2110	1	2417739	2419196	-	1458	1363	1340	1385	1294	1397	1398	847	821	944	862	875	948	918.487	937.626	977.627	954.231	923.694	912.792	1282.71	1148.4	1241	1321.79	1238.56	1419.37	1106.36	-0.443424	0.050178	-8.83702	9.83e-19	4.82e-18	Selenoprotein O and cysteine-containing homologs	NA	K08997	SELENOO, selO; serine/tyrosine/threonine adenylyltransferase [EC:2.7.7.-]	310	99980	Enzymes with EC numbers,	09191	09190
D|1136176.5.peg.1564	1	1823453	1823911	-	459	92	100	108	95	107	108	57	89	82	46	76	48	61.9962	69.9721	76.2338	70.0556	70.7482	70.5161	86.3217	124.492	107.798	70.5366	107.578	71.8668	82.343	-0.446223	0.131025	-3.40564	0.00066	0.0011429	Histone acetyltransferase HPA2	NA	K03829	yedL; putative acetyltransferase [EC:2.3.1.-]	92	99980	Enzymes with EC numbers,	09191	09190
D|1136176.5.peg.341	1	376727	377116	-	390	153	149	156	158	150	161	77	103	113	72	112	128	103.102	104.258	110.115	116.514	99.1797	105.121	116.61	144.075	148.551	110.405	158.536	191.645	125.676	-0.449359	0.114741	-3.91628	8.99e-05	0.00017	Endoribonuclease L-PSP	NA	K09022	ridA, tdcF, RIDA; 2-iminobutanoate/2-iminopropanoate deaminase [EC:3.5.99.10]	129	99980	Enzymes with EC numbers,	09191	09190
D|1136176.5.peg.378	1	424458	424880	-	423	1101	1048	1112	1060	1142	1162	656	778	794	737	751	656	741.932	733.307	784.925	781.673	755.088	758.701	993.456	1088.26	1043.8	1130.12	1063.04	982.18	904.707	-0.468278	0.0446329	-10.4917	9.43e-26	6.21e-25	Putative Holliday junction resolvase YqgF	NA	K07447	ruvX; putative holliday junction resolvase [EC:3.1.-.-]	105	99980	Enzymes with EC numbers,	09191	09190
D|1136176.5.peg.2097	1	2389632	2390039	+	408	122.5	150	122.5	153.5	121	131.5	92.5	93	100	78	89.5	84	82.2123	104.958	86.1159	112.826	80.005	85.5334	139.326	130.087	131.461	119.606	125.979	125.767	110.323	-0.489031	0.108054	-4.52581	6.02e-06	1.28e-05	4-hydroxybenzoyl-CoA thioesterase family active site	NA	K07107	ybgC; acyl-CoA thioester hydrolase [EC:3.1.2.-]	55	99980	Enzymes with EC numbers,	09191	09190
D|1136176.5.peg.3938	2	1099615	1100529	+	915	745	727.5	726.5	712.5	804.5	833	507	554.5	538	527	504	441.5	502.034	508.697	512.46	525.048	531.603	543.888	767.808	774.928	707.262	808.104	713.412	660.276	629.627	-0.50371	0.0543042	-9.27571	1.76e-20	9.48e-20	2-hydroxy-3-oxopropionate reductase (EC 1.1.1.60)	KEGG_ENZYME:1.1.1.60	K08319	ltnD; L-threonate 2-dehydrogenase [EC:1.1.1.411]	206	99980	Enzymes with EC numbers,	09191	09190
D|1136176.5.peg.4399	2	1640960	1642615	+	1656	3106	3075	3056.5	2783	3241.5	3213	1906	2194.5	2389	1575.5	2226	2234	2093.04	2151.64	2157.13	2052.26	2142.94	2097.85	2886.48	3068.94	3140.61	2415.11	3150.9	3344.8	2558.48	-0.50455	0.0683202	-7.38507	1.52e-13	5.46e-13	Putative regulator protein	NA	K03924	moxR; MoxR-like ATPase [EC:3.6.3.-]	246	99980	Enzymes with EC numbers,	09191	09190
D|1136176.5.peg.2529	1	2899315	2900832	-	1518	1175	1147	1212	1122	1303	1285	828	856	936	722	807	757	791.799	802.58	855.512	827.394	861.541	839.011	1253.94	1197.36	1230.48	1107.12	1142.31	1133.4	1003.54	-0.505583	0.0446054	-11.3346	8.85e-30	6.72e-29	Adenylate cyclase (EC 4.6.1.1)	KEGG_ENZYME:4.6.1.1	K18446	ygiF; triphosphatase [EC:3.6.1.25]	242	99980	Enzymes with EC numbers,	09191	09190
D|1136176.5.peg.980	1	1109407	1110147	-	741	1077	978	993	928	1111	1092	770	687	694	769	698	694	725.759	684.327	700.927	684.333	734.591	712.996	1166.1	960.967	912.342	1179.19	988.019	1039.07	874.052	-0.556157	0.0668799	-8.31576	9.12e-17	4.01e-16	Pyruvate formate-lyase activating enzyme (EC 1.97.1.4)	KEGG_ENZYME:1.97.1.4	K04069	pflA, pflC, pflE; pyruvate formate lyase activating enzyme [EC:1.97.1.4]	196	99980	Enzymes with EC numbers,	09191	09190
D|1136176.5.peg.4013	2	1200003	1200959	-	957	191.5	212.5	160.5	157	179.5	186.5	98	125	177.5	83	152	184	128.709	148.341	112.939	115.776	118.354	121.444	148.413	174.848	232.687	127.273	215.156	275.49	159.952	-0.65638	0.160906	-4.07928	4.52e-05	8.82e-05	MoxR-like ATPase in aerotolerance operon	NA	K03924	moxR; MoxR-like ATPase [EC:3.6.3.-]	227	99980	Enzymes with EC numbers,	09191	09190
D|1136176.5.peg.871	1	977060	979105	+	2046	33556	34218	33051	28957	37412	35237	30574	30710	29394	21212	27092	27287	22612.4	23943	23329.6	21353.7	24736.7	23007.2	46301.7	42956.8	38641.8	32526.6	38348.7	40854.8	31551.1	-0.785901	0.0769987	-10.2067	1.85e-24	1.15e-23	2%2C4-dienoyl-CoA reductase [NADPH] (EC 1.3.1.34)	KEGG_ENZYME:1.3.1.34	K00219	fadH; 2,4-dienoyl-CoA reductase (NADPH2) [EC:1.3.1.34]	436	99980	Enzymes with EC numbers,	09191	09190
D|1136176.5.peg.2115	1	2422215	2422679	-	465	997	952	1021	1035	1050	1101	810	872	894	868	925	721	671.85	666.134	720.691	763.237	694.258	718.873	1226.68	1219.74	1175.27	1331	1309.34	1079.5	964.713	-0.793796	0.0586631	-13.5314	1.02e-41	1.2e-40	Phosphohistidine phosphatase SixA	NA	K08296	sixA; phosphohistidine phosphatase [EC:3.1.3.-]	78	99980	Enzymes with EC numbers,	09191	09190
D|1136176.5.peg.2401	1	2743760	2744494	-	735	271.5	310.5	327	271	336.5	299	264	250	277.5	211	288	241.5	182.619	216.913	230.819	199.843	222.163	195.225	399.806	349.697	364.148	323.548	407.664	360.831	287.773	-0.822792	0.0795157	-10.3475	4.29e-25	2.73e-24	COG1496: Uncharacterized conserved protein	NA	K05810	yfiH; polyphenol oxidase [EC:1.10.3.-]	125	99980	Enzymes with EC numbers,	09191	09190
D|1136176.5.peg.4320	2	1555700	1556731	-	1032	356	331	344	375	371	348	406	323	214	359	250	253	239.898	231.608	242.819	276.535	245.305	227.219	614.853	451.808	281.327	550.492	353.875	378.798	341.211	-0.84521	0.159631	-5.29479	1.19e-07	2.94e-07	Putative oxidoreductase YncB	NA	K23256	curA; NADPH-dependent curcumin reductase [EC:1.3.1.-]	359	99980	Enzymes with EC numbers,	09191	09190
D|1136176.5.peg.1507	1	1758522	1758986	+	465	328	316	307	298	328	359	330	364	428	265	361	394	221.03	221.112	216.702	219.753	216.873	234.401	499.757	509.159	562.655	406.352	510.995	589.907	367.391	-1.21208	0.0807597	-15.0085	6.46e-51	1.01e-49	1%2C4-dihydroxy-2-naphthoyl-CoA hydrolase (EC 3.1.2.28) in phylloquinone biosynthesis	KEGG_ENZYME:3.1.2.28	K07107	ybgC; acyl-CoA thioester hydrolase [EC:3.1.2.-]	57	99980	Enzymes with EC numbers,	09191	09190
D|1136176.5.peg.733	1	829119	829472	-	354	76	73.5	74.5	62.5	73	77	78.5	97	99.5	74	98.5	90	51.2142	51.0796	52.2342	45.7205	48.2675	50.2754	118.124	135.682	130.147	113.472	138.719	134.75	89.1405	-1.3691	0.107109	-12.7822	2.06e-37	2.11e-36	bacterioferritin comigratory protein	NA	K03564	BCP, PRXQ, DOT5; thioredoxin-dependent peroxiredoxin [EC:1.11.1.24]	57	99980	Enzymes with EC numbers,	09191	09190
