# Supplementary material for: Polysaccharide breakdown products drive degradation-dispersal cycles of foraging bacteria through changes in metabolism and motility
Source: eLife. 2024 Oct 21;13:RP93855. doi: 10.7554/eLife.93855 (PMC11493405; doi:10.7554/eLife.93855)
Supplement: Supplementary file 10. [file elife-93855-supp10.xlsx]

## Sheet: Sheet 1
Geneid	Chr	Start	End	Strand	Length	L1_raw	L2_raw	L3_raw	L4_raw	L5_raw	L6_raw	P1_raw	P2_raw	P3_raw	P4_raw	P5_raw	P6_raw	L1_DESeq	L2_DESeq	L3_DESeq	L4_DESeq	L5_DESeq	L6_DESeq	P1_DESeq	P2_DESeq	P3_DESeq	P4_DESeq	P5_DESeq	P6_DESeq	baseMean	log2FoldChange	lfcSE	stat	pvalue	padj	RASTtk_Annotation	RASTtk_Ontology_term	BlastKOALA_KO	BlastKOALA_KO_Definition	BlastKOALA_KO_Score	KEGG_pathway	KEGG_pathway_descr	KEGG_CategB	KEGG_CategA
D|1136176.5.peg.4079	2	1282099	1283100	+	1002	2660	2517	3174	2774	3318	3433	113	123	142	105	133	153	1792.5	1761.2	2240.43	2045.62	2193.86	2241.5	171.129	172.051	186.675	161.007	188.261	229.076	1115.27	3.46931	0.100901	34.3832	4.5e-259	1.9e-256	TRAP-type C4-dicarboxylate transport system%2C periplasmic component	NA	K21395	yiaO; TRAP-type transport system periplasmic protein	82	02000	Transporters [BR:ko02000],	09183	09180
D|1136176.5.peg.4286	2	1517684	1519423	+	1740	372	241.5	271.5	336	300	297	31	38.5	28	37.5	11.5	20	250.68	168.633	191.29	247.776	198.359	193.919	46.9469	53.1539	36.8092	56.736	15.5705	29.9445	124.152	2.3905	0.196921	12.1394	6.53e-34	5.76e-33	Cobalt/zinc/cadmium efflux RND transporter%2C membrane fusion protein%2C CzcB family	NA	K07798	cusB, silB; membrane fusion protein, copper/silver efflux system	232	02020 02000	Two-component system [PATH:ko02020], Transporters [BR:ko02000],	09132 09183	09130 09180
D|1136176.5.peg.2273	1	2589802	2591160	+	1359	3155	2611	2585	2924	2540	2638	354	282	282	334	223	221	2126.06	1826.97	1824.67	2156.24	1679.44	1722.42	536.103	394.458	370.721	512.157	315.656	330.887	1149.65	2.20531	0.131502	16.7702	4.03e-63	8.66e-62	AmpG permease	NA	K08218	ampG; MFS transporter, PAT family, beta-lactamase induction signal transducer AmpG	277	01501 02000	beta-Lactam resistance [PATH:ko01501], Transporters [BR:ko02000],	09175 09183	09160 09180
D|1136176.5.peg.2129	1	2440319	2440525	-	207	1975.5	1634.5	1711.5	1903	1824.5	1798	220.5	236.5	188.5	291	147.5	167	1330.9	1143.34	1207.74	1403.32	1206.03	1173.96	333.171	330.114	247.147	446.221	208.078	250.037	773.338	2.04198	0.148726	13.7298	6.73e-43	8.24e-42	Cytochrome c-type biogenesis protein CcmD%2C interacts with CcmCE	NA	K02196	ccmD; heme exporter protein D	28	02010 02000	ABC transporters [PATH:ko02010], Transporters [BR:ko02000],	09131 09183	09130 09180
D|1136176.5.peg.4493	2	1739086	1741524	-	2439	14752.5	12135	12373	13221.5	12601.5	13189.5	2011.5	1629.5	1227.5	2078	903	1419	9940.95	8491.11	8733.71	9749.53	8331.76	8611.45	3045.49	2278.62	1613.03	3186.41	1278.2	2124.56	5615.4	1.99363	0.186715	10.6774	1.3e-26	8.82e-26	D00809136: hypothetical protein	NA	K02004	ABC.CD.P; putative ABC transport system permease protein	335	02000	Transporters [BR:ko02000],	09183	09180
D|1136176.5.peg.4277	2	1507078	1508016	+	939	359.5	292.5	305	298	296	344	43	38.5	39	45.5	32	36.5	241.92	204.318	215.29	219.753	195.715	224.607	65.1199	53.1539	51.27	69.0032	45.296	53.9001	136.612	1.95303	0.117075	16.6819	1.77e-62	3.74e-61	Ferrichrome-binding periplasmic protein precursor (TC 3.A.1.14.3)	NA	K23227	fhuD; ferric hydroxamate transport system substrate-binding protein	162	02010 02000	ABC transporters [PATH:ko02010], Transporters [BR:ko02000],	09131 09183	09130 09180
D|1136176.5.peg.1473	1	1733154	1734332	-	1179	328.5	281.5	247.5	275.5	274.5	287	32	50.5	34	33	40	39.5	221.03	196.621	174.349	202.793	181.168	187.39	48.4613	69.9394	44.6969	50.6023	56.62	58.3918	124.339	1.82332	0.121799	14.9699	1.15e-50	1.77e-49	Probable Co/Zn/Cd efflux system membrane fusion protein	NA	K18298	mexE; membrane fusion protein, multidrug efflux system	147	02000 01504	Transporters [BR:ko02000], Antimicrobial resistance genes [BR:ko01504],	09183	09180
D|1136176.5.peg.638	1	728215	728898	-	684	1217	1108.5	1126.5	1156	1171	1159.5	161.5	152	151.5	150	171	160	820.101	775.29	794.808	852.466	774.263	756.742	243.821	212.616	198.507	230.011	242.05	239.556	511.686	1.80731	0.066014	27.3777	5.05e-165	7.57e-163	Methionine ABC transporter permease protein	NA	K02072	metI; D-methionine transport system permease protein	182	02010 02000	ABC transporters [PATH:ko02010], Transporters [BR:ko02000],	09131 09183	09130 09180
D|1136176.5.peg.4373	2	1608017	1611094	+	3078	1282	978	951.5	1188	1071	1084.5	193	182.5	140	175	92	115.5	863.903	684.327	671.281	876.064	708.143	707.773	292.282	254.579	184.046	268.346	130.226	172.181	484.429	1.79469	0.166625	10.7708	4.73e-27	3.26e-26	RND multidrug efflux transporter%3B Acriflavin resistance protein	NA	K18138	acrB, mexB, adeJ, smeE, mtrD, cmeB; multidrug efflux pump	276	01501 01503 02000 01504	beta-Lactam resistance [PATH:ko01501], Cationic antimicrobial peptide (CAMP) resistance [PATH:ko01503], Transporters [BR:ko02000], Antimicrobial resistance genes [BR:ko01504],	09175 09183	09160 09180
D|1136176.5.peg.2106	1	2412854	2413792	-	939	61	57	52	49	66	56.5	10	5	8	3	16	5	41.1062	39.8841	36.7051	36.1339	43.6391	36.5639	15.1442	6.99394	10.5169	4.60021	22.648	7.48613	25.1185	1.7903	0.241475	7.41401	1.23e-13	4.42e-13	ABC-type sugar transport system%2C permease component	NA	K17316	gtsB, glcF; glucose/mannose transport system permease protein	269	02010 02000	ABC transporters [PATH:ko02010], Transporters [BR:ko02000],	09131 09183	09130 09180
D|1136176.5.peg.4371	2	1605320	1606513	+	1194	225.5	206.5	195.5	216	209.5	210.5	31	24.5	38	26	35.5	25.5	151.621	144.142	137.644	159.284	138.19	137.115	46.9469	33.5709	49.9553	39.8685	49.5425	37.4306	93.776	1.74954	0.128027	13.6654	1.63e-42	1.97e-41	Long-chain fatty acid transport protein	NA	K06076	fadL; long-chain fatty acid transport protein	138	02000	Transporters [BR:ko02000],	09183	09180
D|1136176.5.peg.2127	1	2437873	2439843	-	1971	8769.5	7301.5	7073	7532.5	7090	7557	1286.5	1099.5	1013.5	1362	752.5	910.5	5909.18	5108.66	4992.61	5554.3	4687.9	4934.17	1947.54	1537.27	1331.7	2088.5	1064.46	1362.48	3376.56	1.74104	0.143405	12.1407	6.43e-34	5.68e-33	Cytochrome c heme lyase subunit CcmF	NA	K02198	ccmF; cytochrome c-type biogenesis protein CcmF	486	02000	Transporters [BR:ko02000],	09183	09180
D|1136176.5.peg.2105	1	2412000	2412857	-	858	65.5	81	63	67	75	63.5	5	13	10	12	9	12	43.8016	56.6774	44.4697	49.4076	49.5899	41.1344	7.57208	18.1842	13.1461	18.4009	12.7395	17.9667	31.0908	1.6952	0.214571	7.9004	2.78e-15	1.12e-14	ABC-type sugar transport system%2C permease component	NA	K17317	gtsC, glcG; glucose/mannose transport system permease protein	258	02010 02000	ABC transporters [PATH:ko02010], Transporters [BR:ko02000],	09131 09183	09130 09180
D|1136176.5.peg.3649	2	791300	792991	+	1692	2958	3115	3554	3105	3659	3369	501	529	524	447	581	348	1993.31	2179.63	2508.66	2289.71	2419.32	2199.71	758.722	739.959	688.858	685.432	822.405	521.035	1483.9	1.68811	0.096373	17.5164	1.07e-68	2.74e-67	L-lactate permease	NA	K03303	lctP; lactate permease	602	02000	Transporters [BR:ko02000],	09183	09180
D|1136176.5.peg.2130	1	2440540	2441280	-	741	5323.5	4227	4260.5	4572	4424	4528	811.5	646	623	873	480.5	629.5	3587.02	2957.72	3007	3371.52	2925.14	2956.45	1228.19	903.617	819.005	1338.66	679.44	941.755	2059.63	1.67036	0.143407	11.6477	2.36e-31	1.9e-30	Cytochrome c-type biogenesis protein CcmC%2C putative heme lyase for CcmE	NA	K02195	ccmC; heme exporter protein C	260	02010 02000	ABC transporters [PATH:ko02010], Transporters [BR:ko02000],	09131 09183	09130 09180
D|1136176.5.peg.3116	2	204798	206405	-	1608	952	870	850	883	891	890	104	141	158	107	144	160	641.526	608.757	599.988	651.148	589.128	581.105	157.499	197.229	207.709	164.074	203.832	239.556	403.463	1.64726	0.0814149	20.2329	5.02e-91	1.91e-89	High-affinity choline uptake protein BetT	NA	K05020	opuD, betL; glycine betaine transporter	497	02000	Transporters [BR:ko02000],	09183	09180
D|1136176.5.peg.4300	2	1534483	1535280	-	798	593.5	547	560	532	537.5	551.5	89.5	78	71.5	74.5	88	106.5	399.606	382.747	395.286	392.311	355.063	359.763	134.783	109.105	93.3376	113.472	124.564	158.706	251.562	1.64376	0.0939406	17.4979	1.49e-68	3.71e-67	Amino acid ABC transporter%2C permease protein	NA	K02029	ABC.PA.P; polar amino acid transport system permease protein	169	02000	Transporters [BR:ko02000],	09183	09180
D|1136176.5.peg.3541	2	665319	666743	+	1425	203.5	179.5	179	217.5	181.5	183.5	25	28	38	32	35	25	136.796	125.25	126.35	160.022	119.677	119.486	37.8604	39.166	49.9553	49.0689	49.5425	37.4306	87.5504	1.577	0.137905	11.4354	2.78e-30	2.17e-29	PTS system%2C fructose-specific IIBC component (EC 2.7.1.69)	KEGG_ENZYME:2.7.1.69	K11203	fryC, frvB; fructose-like PTS system EIIC or EIIBC or EIIABC component	174	02000	Transporters [BR:ko02000],	09183	09180
D|1136176.5.peg.316	1	355996	356988	+	993	904	787	775.5	801	797.5	845	136	119	144.5	151	124.5	124.5	609.18	550.68	547.048	590.679	526.975	551.723	205.96	166.456	189.304	231.544	175.522	185.656	377.561	1.55137	0.0771593	20.1061	6.53e-90	2.42e-88	Thiamin ABC transporter%2C substrate-binding component	NA	K02064	thiB, tbpA; thiamine transport system substrate-binding protein	230	02010 02000	ABC transporters [PATH:ko02010], Transporters [BR:ko02000],	09131 09183	09130 09180
D|1136176.5.peg.4301	2	1535280	1536026	-	747	508	431	455.5	499	443	482	78.5	89	76.5	66	86.5	88.5	342.327	301.58	321.17	367.976	292.911	314.711	118.124	124.492	99.9107	101.205	121.733	131.756	219.825	1.4774	0.0958322	15.4166	1.27e-53	2.16e-52	Amino acid ABC transporter%2C ATP-binding protein	NA	K09972	aapP, bztD; general L-amino acid transport system ATP-binding protein [EC:7.4.2.1]	129	02010 02000	ABC transporters [PATH:ko02010], Transporters [BR:ko02000],	09131 09183	09130 09180
D|1136176.5.peg.496	1	564108	565133	-	1026	140.5	133	133.5	127.5	140.5	126.5	24	21.5	17.5	33.5	26.5	17	94.342	93.0628	93.8805	93.6533	92.5678	82.2688	36.346	29.3745	22.3484	50.6023	36.803	25.4528	62.5585	1.4639	0.148202	9.87774	5.2e-23	3.06e-22	(GlcNAc)2 ABC transporter%2C permease component 2	NA	K02034	ABC.PE.P1; peptide/nickel transport system permease protein	229	02024 02000	Quorum sensing [PATH:ko02024], Transporters [BR:ko02000],	09145 09183	09140 09180
D|1136176.5.peg.2063	1	2349372	2350577	-	1206	2265.5	1823.5	1679	1895	1815	1898	504.5	368.5	255	449	135.5	236	1526.32	1275.59	1185.15	1397.42	1200.07	1239.26	763.265	514.754	335.227	688.499	191.092	353.345	889.167	1.45949	0.253353	5.76071	8.38e-09	2.24e-08	Membrane fusion protein of RND family multidrug efflux pump	NA	K03585	acrA, mexA, adeI, smeD, mtrC, cmeA; membrane fusion protein, multidrug efflux system	78	01501 01503 03036 02000 01504	beta-Lactam resistance [PATH:ko01501], Cationic antimicrobial peptide (CAMP) resistance [PATH:ko01503], Chromosome and associated proteins [BR:ko03036], Transporters [BR:ko02000], Antimicrobial resistance genes [BR:ko01504],	09175 09182 09183	09160 09180
D|1136176.5.peg.2345	1	2675864	2676559	-	696	164.5	142.5	138.5	145	152	152	22.5	21	26	32	21	33	110.515	99.3603	97.4098	106.927	100.502	99.2449	33.3171	29.3745	34.18	49.0689	29.7255	49.4084	69.9195	1.45681	0.139057	10.4764	1.11e-25	7.25e-25	Urea ABC transporter%2C ATPase protein UrtE	NA	K11963	urtE; urea transport system ATP-binding protein	181	02010 02000	ABC transporters [PATH:ko02010], Transporters [BR:ko02000],	09131 09183	09130 09180
D|1136176.5.peg.509	1	584496	585341	+	846	364	392	356	344	337	370	51	78	64	77	69	53	245.289	274.29	251.289	253.675	222.824	241.583	77.2352	109.105	84.1353	118.072	97.6695	79.353	171.21	1.39672	0.102059	13.6854	1.24e-42	1.51e-41	Mg/Co/Ni transporter MgtE / CBS domain	NA	K06213	mgtE; magnesium transporter	65	02000	Transporters [BR:ko02000],	09183	09180
D|1136176.5.peg.3561	2	687242	687586	-	345	378	373	354	356	364	353	63	79	57	71	60	69	254.723	260.996	249.877	262.524	240.676	230.483	95.4082	110.504	74.933	108.872	84.93	103.309	173.103	1.37982	0.0944773	14.6048	2.62e-48	3.79e-47	Ethidium bromide-methyl viologen resistance protein EmrE	NA	K03297	emrE, qac, mmr, smr; small multidrug resistance pump	48	02000	Transporters [BR:ko02000],	09183	09180
D|1136176.5.peg.3639	2	777042	778133	-	1092	3164.5	2958	3106.5	3058.5	3174.5	3231.5	575.5	584	637.5	601	518	519.5	2132.13	2069.77	2192.43	2255.05	2098.64	2109.61	870.789	816.892	837.409	921.576	733.229	777.06	1484.55	1.37576	0.0522143	26.3484	5.36e-153	6.07e-151	Maltose/maltodextrin transport ATP-binding protein MalK (EC 3.6.3.19)	KEGG_ENZYME:3.6.3.19	K10112	msmX, msmK, malK, sugC, ggtA, msiK; multiple sugar transport system ATP-binding protein	193	02010 02000	ABC transporters [PATH:ko02010], Transporters [BR:ko02000],	09131 09183	09130 09180
D|1136176.5.peg.2107	1	2413974	2415221	-	1248	639	632	662	652	769	756	114	102	134	120	127	158	430.604	442.223	467.285	480.803	508.461	493.613	172.643	142.676	176.158	184.009	179.768	236.562	326.234	1.37298	0.0927006	14.8109	1.25e-49	1.86e-48	ABC-type sugar transport system%2C periplasmic component	NA	K17315	gtsA, glcE; glucose/mannose transport system substrate-binding protein	346	02010 02000	ABC transporters [PATH:ko02010], Transporters [BR:ko02000],	09131 09183	09130 09180
D|1136176.5.peg.3774	2	919056	920075	-	1020	111	108	103.5	104	115	103.5	14.5	25	22.5	16.5	18.5	25.5	74.7997	75.5698	72.7044	76.6925	76.0378	67.2515	21.2018	34.9697	28.9215	24.5345	25.479	37.4306	51.2994	1.35635	0.155846	8.70317	3.23e-18	1.54e-17	Putrescine transport ATP-binding protein PotA (TC 3.A.1.11.1)	NA	K02052	ABC.SP.A; putative spermidine/putrescine transport system ATP-binding protein	229	02024 02000	Quorum sensing [PATH:ko02024], Transporters [BR:ko02000],	09145 09183	09140 09180
D|1136176.5.peg.3643	2	781449	782696	-	1248	3270.5	3200.5	3245.5	3069	3398.5	3433.5	567.5	651.5	611	563	682.5	607	2203.56	2239.11	2290.54	2263.16	2246.75	2241.5	858.673	910.611	803.229	863.307	965.371	908.816	1566.22	1.34498	0.0409665	32.8313	2.11e-236	6.98e-234	ABC-type sugar transport system%2C periplasmic component	NA	K02027	ABC.MS.S; multiple sugar transport system substrate-binding protein	186	02000	Transporters [BR:ko02000],	09183	09180
D|1136176.5.peg.2131	1	2441427	2442095	-	669	417.5	417	395	455.5	431.5	425	82.5	97.5	73.5	87.5	64.5	83	281.004	291.784	278.818	335.529	284.976	277.494	124.182	135.682	95.9668	133.406	90.592	124.27	204.475	1.31694	0.0998086	13.1947	9.41e-40	1.03e-38	ABC transporter involved in cytochrome c biogenesis%2C CcmB subunit	NA	K02194	ccmB; heme exporter protein B	140	02010 02000	ABC transporters [PATH:ko02010], Transporters [BR:ko02000],	09131 09183	09130 09180
D|1136176.5.peg.4278	2	1508016	1510010	+	1995	428.5	406.5	358	357	358	430	77	76.5	76	74.5	64	81.5	288.417	284.087	252.701	263.262	236.709	280.759	116.61	106.308	99.9107	113.472	90.592	121.275	187.842	1.31293	0.0950269	13.8164	2.03e-43	2.52e-42	Ferrichrome transport system permease protein FhuB (TC 3.A.1.14.3)	NA	K23228	fhuB; ferric hydroxamate transport system permease protein	258	02010 02000	ABC transporters [PATH:ko02010], Transporters [BR:ko02000],	09131 09183	09130 09180
D|1136176.5.peg.4494	2	1741526	1742200	-	675	7006.5	5659	5633.5	6321	5711.5	6002	1466.5	1202	877	1702.5	648	1071.5	4721.14	3959.72	3976.16	4661.28	3776.1	3918.87	2220.13	1681.34	1152.92	2609.85	917.244	1603.53	2933.19	1.29652	0.205276	6.31598	2.68e-10	7.86e-10	ABC transporter%2C ATP-binding protein	NA	K02003	ABC.CD.A; putative ABC transport system ATP-binding protein	144	02000	Transporters [BR:ko02000],	09183	09180
D|1136176.5.peg.4020	2	1208594	1209484	+	891	3040.5	2882.5	2708	2772	2927	2934	554	535	630	552.5	538.5	599.5	2048.57	2016.59	1911.49	2044.15	1935.33	1915.69	838.986	748.351	828.207	846.439	761.539	896.838	1399.35	1.2716	0.0483984	26.2736	3.84e-152	4.24e-150	Maltose/maltodextrin ABC transporter%2C permease protein MalG	NA	K10110	malG; maltose/maltodextrin transport system permease protein	296	02010 02000	ABC transporters [PATH:ko02010], Transporters [BR:ko02000],	09131 09183	09130 09180
D|1136176.5.peg.3776	2	920860	921753	-	894	78	65	77.5	85	64	79.5	22.5	22.5	12	16	9	8.5	52.562	45.4818	54.3518	62.6813	42.3167	51.5812	33.3171	30.7733	15.7754	24.5345	12.7395	11.9778	36.5077	1.26389	0.202731	6.2343	4.54e-10	1.31e-09	ABC transporter permease protein	NA	K02054	ABC.SP.P1; putative spermidine/putrescine transport system permease protein	197	02024 02000	Quorum sensing [PATH:ko02024], Transporters [BR:ko02000],	09145 09183	09140 09180
D|1136176.5.peg.494	1	562039	563034	-	996	225	199	201	213	203	222	43	42	41	49	36	44	151.621	139.244	141.879	157.072	134.223	144.95	65.1199	58.7491	53.8992	75.1368	50.958	65.8779	103.228	1.23917	0.112697	10.9957	4.01e-28	2.87e-27	(GlcNAc)2 ABC transporter%2C ATP-binding component 2	NA	K02032	ddpF; peptide/nickel transport system ATP-binding protein	68	02024 02000	Quorum sensing [PATH:ko02024], Transporters [BR:ko02000],	09145 09183	09140 09180
D|1136176.5.peg.4186	2	1403773	1404750	+	978	176	163	153.5	169	169	180.5	34.5	29.5	34.5	43	24.5	41.5	118.601	114.054	107.998	124.625	111.743	117.527	51.4901	40.5648	44.6969	65.9364	33.972	61.3862	82.7162	1.23051	0.126854	9.70022	3.01e-22	1.74e-21	Ferrichrome ABC transporter%2C periplasmic iron-binding protein PvuB	NA	K23181	fecB; ferric citrate transport system substrate-binding protein	135	02010 02000	ABC transporters [PATH:ko02010], Transporters [BR:ko02000],	09131 09183	09130 09180
D|1136176.5.peg.439	1	493290	494420	+	1131	1735.5	1465.5	1448.5	1460.5	1613.5	1566	305	363	342	297	301.5	291.5	1169.17	1025.09	1022.1	1076.64	1066.51	1022.48	461.897	507.76	449.598	455.421	426.065	435.693	759.869	1.2215	0.0583797	20.9233	3.29e-97	1.44e-95	Oxaloacetate decarboxylase beta chain (EC 4.1.1.3)	KEGG_ENZYME:4.1.1.3	K20509	madB, oadB, gcdB, mmdB; carboxybiotin decarboxylase [EC:7.2.4.1]	426	00620 00650 00362 02000	Pyruvate metabolism [PATH:ko00620], Butanoate metabolism [PATH:ko00650], Benzoate degradation [PATH:ko00362], Transporters [BR:ko02000],	09101 09111 09183	09100 09180
D|1136176.5.peg.3553	2	682177	683085	+	909	383	347	298.5	306.5	293.5	336.5	82	67	63	90	52	57	258.093	242.803	210.349	225.653	193.731	219.383	124.182	93.7188	82.8207	138.006	73.606	85.3419	162.307	1.18121	0.134488	8.78299	1.59e-18	7.7e-18	Permease of the drug/metabolite transporter (DMT) superfamily	NA	K15269	pecM; probable blue pigment (indigoidine) exporter	133	02000	Transporters [BR:ko02000],	09183	09180
D|1136176.5.peg.3641	2	779500	780393	-	894	1406.5	1357	1330.5	1301	1414	1416.5	258.5	288.5	334.5	299.5	316.5	259.5	947.463	949.521	938.805	959.393	934.934	924.545	390.719	402.851	439.081	458.488	447.298	387.781	681.74	1.16143	0.0494062	23.5077	3.4e-122	2.59e-120	ABC-type sugar transport system%2C permease component	NA	K02026	ABC.MS.P1; multiple sugar transport system permease protein	162	02000	Transporters [BR:ko02000],	09183	09180
D|1136176.5.peg.2347	1	2677400	2678581	-	1182	137	123.5	131	105	110.5	126.5	31	25.5	31	20	24.5	26	92.3204	86.0656	92.4687	77.4299	72.7318	82.2688	46.9469	34.9697	40.753	30.6681	33.972	38.9279	60.7936	1.15289	0.143732	8.02115	1.05e-15	4.34e-15	Urea ABC transporter%2C permease protein UrtC	NA	K11961	urtC; urea transport system permease protein	335	02010 02000	ABC transporters [PATH:ko02010], Transporters [BR:ko02000],	09131 09183	09130 09180
D|1136176.5.peg.309	1	347760	351512	+	3753	5262	4587.5	4430.5	4630	4747.5	4832	1013.5	1058	1067.5	976.5	1069	977.5	3545.91	3209.62	3127	3414.29	3138.71	3154.94	1534.1	1479.92	1402.69	1496.6	1513.17	1462.79	2373.31	1.14039	0.0454122	25.1121	3.67e-139	3.48e-137	Uncharacterized protein YtfN	NA	K09800	tamB; translocation and assembly module TamB	416	02000	Transporters [BR:ko02000],	09183	09180
D|1136176.5.peg.4197	2	1415844	1417196	+	1353	220	212	226	231	207	200	49	40	45	49	51	58	148.252	148.341	159.526	170.346	136.868	130.585	74.2063	55.9515	59.1576	75.1368	72.1905	86.8391	109.783	1.08225	0.118167	9.15869	5.25e-20	2.76e-19	Multidrug and toxin extrusion (MATE) family efflux pump YdhE/NorM%2C homolog	NA	K03327	TC.MATE, SLC47A, norM, mdtK, dinF; multidrug resistance protein, MATE family	77	02000	Transporters [BR:ko02000],	09183	09180
D|1136176.5.peg.4038	2	1229004	1231541	-	2538	7130.5	5588.5	5491	6388	5820.5	6014.5	1892.5	1487	1039.5	1897	651	1143.5	4804.7	3910.04	3875.92	4710.69	3848.17	3926.7	2865.27	2080	1365.88	2908.87	921.49	1711.33	3077.42	1.08128	0.22696	4.76418	1.9e-06	4.2e-06	AttF component of AttEFGH ABC transport system / AttG component of AttEFGH ABC transport system	NA	K02004	ABC.CD.P; putative ABC transport system permease protein	170	02000	Transporters [BR:ko02000],	09183	09180
D|1136176.5.peg.923	1	1042066	1042968	+	903	660	588.5	522	558	572	594.5	133.5	136.5	133	131	127.5	134	444.755	411.436	368.463	411.484	378.205	387.839	201.417	190.235	174.844	200.876	179.768	200.628	295.829	1.06806	0.0766683	13.9309	4.11e-44	5.25e-43	Oligopeptide transport system permease protein OppC (TC 3.A.1.5.1)	NA	K15582	oppC; oligopeptide transport system permease protein	249	02010 02024 01501 02000	ABC transporters [PATH:ko02010], Quorum sensing [PATH:ko02024], beta-Lactam resistance [PATH:ko01501], Transporters [BR:ko02000],	09131 09145 09175 09183	09130 09140 09160 09180
D|1136176.5.peg.497	1	565136	566122	-	987	66.5	58	68	59.5	70	75.5	23	13	19.5	14.5	10.5	13	44.4755	40.5838	47.999	43.5082	46.2839	48.9695	34.8315	18.1842	24.9777	21.4677	14.155	19.4639	33.7417	1.03608	0.183364	5.65039	1.6e-08	4.22e-08	(GlcNAc)2 ABC transporter%2C permease component 1	NA	K02033	ABC.PE.P; peptide/nickel transport system permease protein	268	02024 02000	Quorum sensing [PATH:ko02024], Transporters [BR:ko02000],	09145 09183	09140 09180
D|1136176.5.peg.1616	1	1885922	1886881	-	960	322.5	286.5	296	282.5	311.5	319	74	75.5	61.5	71.5	88.5	58.5	216.987	200.12	208.937	207.955	205.633	208.284	112.067	104.909	80.1915	108.872	124.564	86.8391	155.446	1.0188	0.0923164	11.0359	2.56e-28	1.85e-27	Ribose/xylose/arabinose/galactoside ABC-type transport systems%2C permease component 1	NA	K02057	ABC.SS.P; simple sugar transport system permease protein	230	02000	Transporters [BR:ko02000],	09183	09180
D|1136176.5.peg.103	1	125896	127251	+	1356	464	413	401	404	434	458	79	99	116	107	97	114	312.676	288.985	283.053	297.921	286.96	299.041	119.639	138.48	152.495	164.074	137.303	170.684	220.943	1.00348	0.0799841	12.5459	4.18e-36	4.03e-35	DNA-damage-inducible protein F	NA	K03327	TC.MATE, SLC47A, norM, mdtK, dinF; multidrug resistance protein, MATE family	278	02000	Transporters [BR:ko02000],	09183	09180
D|1136176.5.peg.336	1	373198	373875	+	678	10647.5	9251	9161.5	8941	9769.5	9848.5	2319	2397	2247	2440	2177.5	2164.5	7174.71	6473.12	6466.46	6593.34	6459.25	6430.03	3511.93	3352.89	2953.94	3741.51	3081.54	3240	4956.56	0.99436	0.0592389	16.7856	3.11e-63	6.85e-62	Uncharacterized ABC transporter%2C auxiliary component YrbC	NA	K07323	mlaC; phospholipid transport system substrate-binding protein	80	02010 02000	ABC transporters [PATH:ko02010], Transporters [BR:ko02000],	09131 09183	09130 09180
D|1136176.5.peg.4189	2	1406755	1407519	+	765	125.5	111	97	111.5	117.5	114.5	23	30	27	33.5	27	22	84.2339	77.669	68.4692	81.8544	77.3602	74.4337	34.8315	41.9636	35.4946	50.6023	38.2185	32.939	58.1725	0.990035	0.14059	7.04201	1.89e-12	6.34e-12	Ferrichrome ABC transporter (ATP binding subunit) PvuE	NA	K23184	fecE; ferric citrate transport system ATP-binding protein [EC:7.2.2.18]	172	02010 02000	ABC transporters [PATH:ko02010], Transporters [BR:ko02000],	09131 09183	09130 09180
D|1136176.5.peg.1472	1	1730013	1733141	-	3129	715.5	676.5	645.5	636.5	682.5	728	148	186.5	170	159	149	169.5	481.818	473.011	455.285	469.004	450.937	475.331	224.133	260.174	223.484	243.811	210.909	253.031	351.744	0.987987	0.0634297	15.5761	1.06e-54	1.9e-53	RND efflux system%2C inner membrane transporter CmeB	NA	K18299	mexF; multidrug efflux pump	707	02000 01504	Transporters [BR:ko02000], Antimicrobial resistance genes [BR:ko01504],	09183	09180
D|1136176.5.peg.3783	2	927236	928102	-	867	72	64	56	62	67	74	10	17	19	8	17	24	48.5187	44.7821	39.5286	45.7205	44.3003	48.3166	15.1442	23.7794	24.9777	12.2672	24.0635	35.9334	33.9444	0.987703	0.18351	5.38228	7.35e-08	1.84e-07	extracellular solute-binding protein%2C family 3	NA	K02030	ABC.PA.S; polar amino acid transport system substrate-binding protein	162	02000	Transporters [BR:ko02000],	09183	09180
D|1136176.5.peg.4188	2	1405781	1406752	+	972	215.5	216	194.5	181	207.5	184.5	43	39	57	44.5	55	53.5	144.882	151.14	136.938	133.474	136.868	120.139	65.1199	54.5527	74.933	67.4698	77.8525	79.353	103.56	0.972641	0.112093	8.67709	4.06e-18	1.93e-17	Ferrichrome ABC transporter (permease) PvuD	NA	K23182	fecD; ferric citrate transport system permease protein	225	02010 02000	ABC transporters [PATH:ko02010], Transporters [BR:ko02000],	09131 09183	09130 09180
D|1136176.5.peg.495	1	563122	564105	-	984	111	104	104.5	109	113.5	99	27	17.5	24	29	23	36	74.7997	72.7709	73.4103	80.3796	74.7154	64.6398	40.8892	23.7794	31.5507	44.4687	32.5565	53.9001	55.655	0.966756	0.14842	6.51367	7.33e-11	2.23e-10	(GlcNAc)2 ABC transporter%2C ATP-binding component 1	NA	K02031	ddpD; peptide/nickel transport system ATP-binding protein	243	02024 02000	Quorum sensing [PATH:ko02024], Transporters [BR:ko02000],	09145 09183	09140 09180
D|1136176.5.peg.3781	2	925677	926342	-	666	417.5	405.5	397	374.5	401	454	108	110	103	103	87	92.5	281.004	283.387	280.23	275.798	265.14	296.429	163.557	153.867	135.405	157.941	123.148	137.745	212.804	0.951703	0.0790879	12.0335	2.37e-33	2.04e-32	Amino acid ABC transporter%2C permease protein%2C 3-TM region%2C His/Glu/Gln/Arg/opine	NA	K02029	ABC.PA.P; polar amino acid transport system permease protein	150	02000	Transporters [BR:ko02000],	09183	09180
D|1136176.5.peg.4332	2	1566041	1566889	+	849	136.5	135	129	135	133	169.5	31	28	34.5	40.5	38	36	91.6465	94.4623	91.057	99.5527	87.9394	110.345	46.9469	39.166	44.6969	61.3362	53.789	53.9001	72.9031	0.945521	0.129257	7.31507	2.57e-13	9.12e-13	Molybdenum transport system permease protein ModB (TC 3.A.1.8.1)	NA	K02053	ABC.SP.P; putative spermidine/putrescine transport system permease protein	152	02024 02000	Quorum sensing [PATH:ko02024], Transporters [BR:ko02000],	09145 09183	09140 09180
D|1136176.5.peg.990	1	1123082	1124287	-	1206	1193	971	865	941	971	1010	324	237	216	350	174	165	803.928	679.429	610.576	693.919	642.023	659.456	490.671	331.513	283.957	536.692	246.297	247.042	518.792	0.938094	0.18477	5.07708	3.83e-07	9.09e-07	Multidrug resistance protein D	NA	K08154	emrD; MFS transporter, DHA1 family, 2-module integral membrane pump EmrD	214	02000	Transporters [BR:ko02000],	09183	09180
D|1136176.5.peg.3780	2	924830	925684	-	855	644.5	552.5	548	544.5	556	578	136	139	165	161	132	125.5	433.973	386.246	386.816	401.161	367.626	377.392	205.96	194.431	216.911	246.878	186.846	187.153	299.283	0.927253	0.077409	11.9786	4.6e-33	3.89e-32	Histidine ABC transporter%2C ATP-binding protein HisP (TC 3.A.1.3.1)	NA	K02028	ABC.PA.A; polar amino acid transport system ATP-binding protein [EC:7.4.2.1]	130	02000	Transporters [BR:ko02000],	09183	09180
D|1136176.5.peg.1891	1	2176243	2177085	-	843	319	248	231	262	256	259	77	65	81	70	52	59	214.965	173.531	163.056	193.206	169.267	169.108	116.61	90.9212	106.484	107.338	73.606	88.3363	138.869	0.894162	0.114788	7.7897	6.72e-15	2.65e-14	Formate efflux transporter (TC 2.A.44 family)	NA	K06212	focA; formate transporter	187	02000	Transporters [BR:ko02000],	09183	09180
D|1136176.5.peg.4187	2	1404747	1405781	+	1035	261	243	220	235.5	254	260.5	60.5	58.5	78.5	52	59.5	71	175.88	170.032	155.291	173.295	167.944	169.761	90.8649	81.1297	102.54	79.737	83.5145	106.303	129.691	0.894038	0.0964264	9.27172	1.83e-20	9.82e-20	Ferrichrome ABC transporter (permease) PvuC	NA	K23183	fecC; ferric citrate transport system permease protein	177	02010 02000	ABC transporters [PATH:ko02010], Transporters [BR:ko02000],	09131 09183	09130 09180
D|1136176.5.peg.2354	1	2686276	2687436	-	1161	3601	3485	3008.5	2914	3275.5	3562	657.5	766.5	1094.5	639	997	961.5	2426.61	2438.53	2123.25	2148.86	2165.42	2325.73	994.971	1071.47	1438.19	979.845	1411.25	1438.83	1746.91	0.893386	0.110607	8.07714	6.63e-16	2.78e-15	Outer membrane protein YfgL%2C lipoprotein component of the protein assembly complex (forms a complex with YaeT%2C YfiO%2C and NlpB)	NA	K17713	bamB; outer membrane protein assembly factor BamB	208	02000	Transporters [BR:ko02000],	09183	09180
D|1136176.5.peg.4185	2	1401556	1403685	+	2130	196	187	191	186	187	214	70	66	32	51	40	39	132.079	130.848	134.821	137.161	123.644	139.726	106.009	92.32	42.0677	78.2036	56.62	58.3918	102.658	0.886676	0.154949	5.72236	1.05e-08	2.8e-08	Vibrioferrin receptor PvuA	NA	K16091	fecA; Fe(3+) dicitrate transport protein	403	02000	Transporters [BR:ko02000],	09183	09180
D|1136176.5.peg.4551	3	49303	50070	-	768	87	76	93.5	94	88.5	99.5	19	22.5	17	20	37.5	24.5	58.6268	53.1788	65.6457	69.3182	58.1854	64.6398	28.7739	30.7733	22.3484	30.6681	52.3735	35.9334	47.5388	0.881398	0.161753	5.44904	5.06e-08	1.28e-07	hypothetical protein	NA	K02013	ABC.FEV.A; iron complex transport system ATP-binding protein [EC:7.2.2.-]	84	02000	Transporters [BR:ko02000],	09183	09180
D|1136176.5.peg.1115	1	1264814	1265659	-	846	1348	1231	1124	1162	1203.5	1203	387.5	291.5	344.5	284	290	297.5	908.379	861.356	793.396	856.891	795.421	785.471	586.079	407.047	452.227	435.487	410.495	444.676	644.744	0.871109	0.0842813	10.3357	4.86e-25	3.09e-24	Anaerobic dimethyl sulfoxide reductase chain C (EC 1.8.5.3)	KEGG_ENZYME:1.8.5.3	K07308	dmsC; anaerobic dimethyl sulfoxide reductase subunit C	120	00920 02000	Sulfur metabolism [PATH:ko00920], Transporters [BR:ko02000],	09102 09183	09100 09180
D|1136176.5.peg.333	1	371124	371918	+	795	4066.5	3575	3544.5	3531	3677.5	3867	1114	904	1011	1026	865.5	894.5	2739.96	2501.5	2501.6	2603.86	2431.23	2524.87	1687.06	1264.5	1329.08	1573.27	1224.41	1338.52	1976.65	0.863151	0.0783897	11.011	3.38e-28	2.43e-27	Uncharacterized ABC transporter%2C ATP-binding protein YrbF	NA	K02065	mlaF, linL, mkl; phospholipid/cholesterol/gamma-HCH transport system ATP-binding protein	189	02010 02000	ABC transporters [PATH:ko02010], Transporters [BR:ko02000],	09131 09183	09130 09180
D|1136176.5.peg.335	1	372702	373193	+	492	4866.5	4113	4110.5	4111.5	4269.5	4306	1111	1092.5	1203	1199	1064.5	1097	3279.06	2877.95	2901.12	3031.56	2822.66	2811.5	1682.52	1527.48	1581.48	1838.55	1506.09	1642.46	2291.87	0.85859	0.0592424	14.4928	1.34e-47	1.93e-46	Uncharacterized ABC transporter%2C periplasmic component YrbD	NA	K02067	mlaD, linM; phospholipid/cholesterol/gamma-HCH transport system substrate-binding protein	116	02010 02000	ABC transporters [PATH:ko02010], Transporters [BR:ko02000],	09131 09183	09130 09180
D|1136176.5.peg.4417	2	1666018	1666578	+	561	253	224.5	210.5	227	248.5	224.5	47.5	55	75	57.5	72	60	170.489	156.737	148.232	167.396	163.977	146.256	71.1775	76.9333	98.5961	87.4041	101.916	89.8335	123.246	0.853903	0.101767	8.3908	4.83e-17	2.16e-16	Ferric siderophore transport system%2C biopolymer transport protein ExbB	NA	K03561	exbB; biopolymer transport protein ExbB	118	02000	Transporters [BR:ko02000],	09183	09180
D|1136176.5.peg.4034	2	1223635	1225686	+	2052	2013.5	1968	1930.5	1878.5	2048.5	2101.5	477	510.5	636.5	478	573	498.5	1356.5	1377.05	1362.33	1384.89	1354.13	1371.8	722.376	713.382	836.095	732.967	811.081	745.618	1064.02	0.845352	0.043536	19.4173	5.51e-84	1.85e-82	Macrolide export ATP-binding/permease protein MacB (EC 3.6.3.-)	KEGG_ENZYME:3.6.3.-	K05685	macB; macrolide transport system ATP-binding/permease protein [EC:3.6.3.-]	401	02010 02000	ABC transporters [PATH:ko02010], Transporters [BR:ko02000],	09131 09183	09130 09180
D|1136176.5.peg.2243	1	2561144	2561800	+	657	187.5	186	174	199.5	183	208	52	65	53.5	47.5	41.5	46.5	126.014	130.148	122.821	146.748	120.999	135.809	78.7496	90.9212	69.6746	72.07	58.0355	68.8724	101.739	0.83543	0.111039	7.52376	5.32e-14	1.96e-13	LPS-assembly lipoprotein RlpB precursor (Rare lipoprotein B)	NA	K03643	lptE, rlpB; LPS-assembly lipoprotein	56	02000	Transporters [BR:ko02000],	09183	09180
D|1136176.5.peg.3423	2	534023	535456	-	1434	194	181	170.5	190.5	193.5	194	38.5	49.5	60	57	50	49	130.731	126.649	119.998	140.111	127.611	126.668	57.5478	68.5406	78.8769	87.4041	70.775	73.3641	100.69	0.820796	0.10712	7.66238	1.83e-14	6.98e-14	RND efflux system%2C outer membrane lipoprotein%2C NodT family	NA	K18139	oprM, emhC, ttgC, cusC, adeK, smeF, mtrE, cmeC, gesC; outer membrane protein, multidrug efflux system	37	02024 01501 02000 01504	Quorum sensing [PATH:ko02024], beta-Lactam resistance [PATH:ko01501], Transporters [BR:ko02000], Antimicrobial resistance genes [BR:ko01504],	09145 09175 09183	09140 09160 09180
D|1136176.5.peg.1356	1	1613387	1615303	+	1917	2094	1985	1951	1890	2104.5	2112.5	469.5	523.5	605.5	487.5	613	595.5	1411.09	1388.95	1377.15	1393.74	1391.16	1378.98	710.261	731.566	795.342	746.768	867.701	890.849	1090.3	0.814253	0.0542775	15.0017	7.16e-51	1.11e-49	ABC transporter ATP-binding protein uup	NA	K15738	uup; ABC transport system ATP-binding/permease protein	441	02000	Transporters [BR:ko02000],	09183	09180
D|1136176.5.peg.2346	1	2676561	2677403	-	843	108	107.5	98	104	101.5	98	25	41	28.5	30.5	23.5	21.5	72.7781	74.8701	69.1751	76.6925	66.781	63.9868	37.8604	57.3503	36.8092	46.0021	32.5565	31.4417	55.5253	0.80735	0.143561	5.62374	1.87e-08	4.9e-08	Urea ABC transporter%2C ATPase protein UrtD	NA	K11962	urtD; urea transport system ATP-binding protein	191	02010 02000	ABC transporters [PATH:ko02010], Transporters [BR:ko02000],	09131 09183	09130 09180
D|1136176.5.peg.4004	2	1188668	1189597	+	930	187.5	147.5	161.5	180	181.5	182	68	44	48	46.5	34.5	43	126.014	102.859	113.645	132.737	119.677	118.833	102.98	61.5466	63.1015	70.5366	48.127	64.3807	93.7031	0.803358	0.133156	6.03319	1.61e-09	4.5e-09	Phosphate transport system permease protein PstC (TC 3.A.1.7.1)	NA	K02037	pstC; phosphate transport system permease protein	200	02010 02000	ABC transporters [PATH:ko02010], Transporters [BR:ko02000],	09131 09183	09130 09180
D|1136176.5.peg.3646	2	786405	787688	-	1284	369	304	328	325	340	392	84	98	119	112	62	88	248.659	212.715	231.525	239.664	224.807	255.947	127.211	137.081	156.439	171.741	87.761	131.756	185.442	0.800263	0.114516	6.98825	2.78e-12	9.2e-12	Maltoporin (maltose/maltodextrin high-affinity receptor%2C phage lambda receptor protein)	NA	K02024	lamB; maltoporin	186	02000	Transporters [BR:ko02000],	09183	09180
D|1136176.5.peg.675	1	763264	765669	+	2406	15095.5	14221.5	13077	12913	14101.5	14499	3466	3830	4536	3441.5	4008.5	3941	10172.1	9950.73	9230.64	9522.4	9323.56	9466.79	5248.96	5357.36	5963.09	5276.44	5673.32	5900.57	7590.5	0.786832	0.0449282	17.5131	1.14e-68	2.87e-67	Outer membrane protein assembly factor YaeT precursor	NA	K07277	SAM50, TOB55, bamA; outer membrane protein insertion porin family	530	03029 02000	Mitochondrial biogenesis [BR:ko03029], Transporters [BR:ko02000],	09182 09183	09180
D|1136176.5.peg.3642	2	780395	781381	-	987	1493.5	1441	1477.5	1413.5	1545	1568.5	384	371.5	453	405	437.5	420.5	1006.09	1008.3	1042.57	1041.98	1021.55	1023.79	581.535	518.95	595.52	621.029	618.573	628.835	809.06	0.786413	0.0469569	16.7476	5.9e-63	1.26e-61	ABC-type sugar transport system%2C permease component	NA	K02025	ABC.MS.P; multiple sugar transport system permease protein	210	02000	Transporters [BR:ko02000],	09183	09180
D|1136176.5.peg.4246	2	1464111	1465061	+	951	37.5	38	42.5	40.5	50.5	39	12	7.5	10.5	10	16	13	24.9332	26.5894	29.6465	29.4971	33.0599	25.4642	18.173	9.79151	13.1461	15.334	22.648	19.4639	22.3122	0.785892	0.216187	3.63525	0.000278	0.000502	Catechol siderophore ABC transporter%2C permease component	NA	K02015	ABC.FEV.P; iron complex transport system permease protein	146	02000	Transporters [BR:ko02000],	09183	09180
D|1136176.5.peg.1086	1	1229498	1230274	+	777	165	130.5	147.5	153.5	165	151.5	42.5	46.5	37	37	42.5	48	111.189	90.9637	103.763	112.826	109.098	98.592	63.6054	64.3442	48.6407	56.736	59.451	71.8668	82.5896	0.784714	0.119421	6.57101	5e-11	1.53e-10	Lysine-arginine-ornithine-binding periplasmic protein precursor (TC 3.A.1.3.1)	NA	K10022	aotJ; arginine/ornithine transport system substrate-binding protein	124	02010 02000	ABC transporters [PATH:ko02010], Transporters [BR:ko02000],	09131 09183	09130 09180
D|1136176.5.peg.3586	2	712925	714253	-	1329	732	598	598	602	661	680	188	177	190	204	158	156	493.274	418.433	422.109	443.931	437.052	443.99	284.71	247.585	249.777	312.815	223.649	233.567	350.908	0.779259	0.0803467	9.6987	3.05e-22	1.76e-21	C4-dicarboxylate transporter DcuB	NA	K07792	dcuB; anaerobic C4-dicarboxylate transporter DcuB	353	02020 02000	Two-component system [PATH:ko02020], Transporters [BR:ko02000],	09132 09183	09130 09180
D|1136176.5.peg.4414	2	1661601	1663697	+	2097	2687	2304	2348	2334	2514	2461	696	711	677	829	576	577	1810.69	1612.16	1657.38	1721.16	1662.25	1606.85	1054.03	994.538	889.994	1271.19	815.328	863.899	1329.96	0.77477	0.0956845	8.09713	5.63e-16	2.36e-15	Ferrichrome-iron receptor	NA	K02014	TC.FEV.OM; iron complex outermembrane recepter protein	293	02000	Transporters [BR:ko02000],	09183	09180
D|1136176.5.peg.4146	2	1359778	1361103	+	1326	1734	1615	1677	1702	1837.5	1756	436	506	504	445.5	519	473	1168.49	1130.05	1183.74	1255.1	1214.62	1146.54	660.285	707.786	662.566	682.365	734.644	708.188	937.865	0.772112	0.0464351	16.6278	4.39e-62	9.05e-61	Secretion protein%2C HlyD family	NA	K12542	lapC; membrane fusion protein, adhesin transport system	157	02000 02044	Transporters [BR:ko02000], Secretion system [BR:ko02044],	09183	09180
D|1136176.5.peg.4247	2	1465074	1465838	+	765	116	95.5	125	101	114	104.5	31	35	23.5	25	44	25	78.1691	66.4735	88.2335	74.4802	75.3766	67.9044	46.9469	48.9576	30.2361	38.3351	62.282	37.4306	59.5688	0.771243	0.147776	5.21901	1.8e-07	4.38e-07	Catechol siderophore ABC transporter%2C ATP-binding component	NA	K02013	ABC.FEV.A; iron complex transport system ATP-binding protein [EC:7.2.2.-]	162	02000	Transporters [BR:ko02000],	09183	09180
D|1136176.5.peg.2985	2	35593	37320	-	1728	476	445	463	465	474	507	147	100	164	135	132	118	320.763	311.376	326.817	342.904	313.408	331.034	222.619	139.879	215.597	207.01	186.846	176.673	257.91	0.761509	0.0869122	8.76182	1.92e-18	9.27e-18	Uncharacterized protein YtfM precursor	NA	K07278	tamA; translocation and assembly module TamA	186	02000	Transporters [BR:ko02000],	09183	09180
D|1136176.5.peg.4418	2	1666575	1666979	+	405	296.5	292	253.5	264.5	284.5	260	79.5	73.5	99.5	70.5	72	72	199.466	204.318	178.585	194.681	187.78	169.761	119.639	102.111	130.147	107.338	101.916	107.8	150.295	0.759399	0.0935031	8.12165	4.6e-16	1.94e-15	Biopolymer transport protein ExbD/TolR	NA	K03559	exbD; biopolymer transport protein ExbD	130	02000	Transporters [BR:ko02000],	09183	09180
D|1136176.5.peg.4298	2	1532560	1533483	-	924	239	249	215	204	225	247	69	63	65	68	57	68	161.055	174.23	151.762	150.435	148.77	161.273	104.495	88.1236	85.4499	104.272	80.6835	101.811	126.03	0.751965	0.0979672	7.67567	1.65e-14	6.3e-14	amino acid ABC transporter%2C permease protein	NA	K02029	ABC.PA.P; polar amino acid transport system permease protein	151	02000	Transporters [BR:ko02000],	09183	09180
D|1136176.5.peg.334	1	371920	372699	+	780	5719.5	4838	4874.5	5103.5	5044	5220.5	1682.5	1405.5	1521	1582	1290	1271.5	3853.87	3385.25	3440.4	3763.09	3335.08	3408.28	2547.25	1965.3	1999.53	2425.85	1825.99	1902.97	2821.07	0.742391	0.087569	8.47779	2.3e-17	1.05e-16	Uncharacterized ABC transporter%2C permease component YrbE	NA	K02066	mlaE, linK; phospholipid/cholesterol/gamma-HCH transport system permease protein	268	02010 02000	ABC transporters [PATH:ko02010], Transporters [BR:ko02000],	09131 09183	09130 09180
D|1136176.5.peg.4030	2	1217756	1220893	-	3138	3342.5	3248	3194	3012	3427.5	3374.5	744.5	950.5	1092.5	795	1087	962	2252.08	2272.69	2254.54	2221.13	2265.93	2202.98	1126.72	1328.85	1435.56	1219.06	1538.65	1440.33	1796.54	0.734892	0.067534	10.8818	1.41e-27	9.9e-27	RND efflux system%2C inner membrane transporter CmeB	NA	K18138	acrB, mexB, adeJ, smeE, mtrD, cmeB; multidrug efflux pump	636	01501 01503 02000 01504	beta-Lactam resistance [PATH:ko01501], Cationic antimicrobial peptide (CAMP) resistance [PATH:ko01503], Transporters [BR:ko02000], Antimicrobial resistance genes [BR:ko01504],	09175 09183	09160 09180
D|1136176.5.peg.391	1	438727	439356	-	630	252	226	193	217	216	223	57	74	58	77	49	65	169.816	158.137	136.233	160.022	142.819	145.603	86.3217	103.51	76.2476	118.072	69.3595	97.3197	121.955	0.733278	0.114225	6.4196	1.37e-10	4.09e-10	Arginine exporter protein ArgO	NA	K06895	lysE, argO; L-lysine exporter family protein LysE/ArgO	101	02000	Transporters [BR:ko02000],	09183	09180
D|1136176.5.peg.4407	2	1654219	1655034	+	816	240	241	237	223	245	261	72	62	70	79	68	67	161.729	168.633	167.291	164.446	161.994	170.414	109.038	86.7248	92.023	121.139	96.254	100.314	133.333	0.721719	0.0922393	7.82442	5.1e-15	2.03e-14	Nitrite transporter from formate/nitrite family	NA	K21993	fdhC; formate transporter	189	02000	Transporters [BR:ko02000],	09183	09180
D|1136176.5.peg.4333	2	1566892	1567680	+	789	126.5	105	105.5	92.5	120	119.5	37	30	28	35.5	31	32	84.9078	73.4707	74.1162	67.8433	79.3438	77.6983	56.0334	41.9636	36.8092	53.6692	43.8805	47.9112	61.4706	0.717619	0.133561	5.37296	7.75e-08	1.93e-07	ABC transporter permease protein	NA	K02053	ABC.SP.P; putative spermidine/putrescine transport system permease protein	151	02024 02000	Quorum sensing [PATH:ko02024], Transporters [BR:ko02000],	09145 09183	09140 09180
D|1136176.5.peg.437	1	491207	491464	+	258	97	94	87	81	98	102	22	38	20	21	36	25	65.3655	65.7737	61.4105	59.7316	64.7974	66.5986	33.3171	53.1539	26.2923	32.2015	50.958	37.4306	51.4192	0.717588	0.147164	4.87611	1.08e-06	2.47e-06	Oxaloacetate decarboxylase gamma chain (EC 4.1.1.3)	KEGG_ENZYME:4.1.1.3	K01573	oadG; oxaloacetate decarboxylase (Na+ extruding) subunit gamma	32	00620 02000	Pyruvate metabolism [PATH:ko00620], Transporters [BR:ko02000],	09101 09183	09100 09180
D|1136176.5.peg.4010	2	1197584	1198591	-	1008	178.5	162	142	118.5	141	150.5	31	39.5	73	37	44	36.5	119.949	113.355	100.233	87.0164	93.229	97.9391	46.9469	54.5527	95.9668	56.736	62.282	53.9001	81.8422	0.714908	0.151164	4.72936	2.25e-06	4.96e-06	BatA (Bacteroides aerotolerance operon)	NA	K07114	yfbK; Ca-activated chloride channel homolog	151	02000	Transporters [BR:ko02000],	09183	09180
D|1136176.5.peg.3653	2	797850	799586	-	1737	216.5	210	197.5	219	192.5	230.5	48	64	67.5	48	65	79.5	145.556	146.941	139.056	161.497	126.95	150.173	72.6919	89.5224	88.0792	73.6034	92.0075	118.281	117.03	0.701828	0.110442	6.35473	2.09e-10	6.17e-10	Dipeptide transport system permease protein DppC (TC 3.A.1.5.2)	NA	K02033	ABC.PE.P; peptide/nickel transport system permease protein	266	02024 02000	Quorum sensing [PATH:ko02024], Transporters [BR:ko02000],	09145 09183	09140 09180
D|1136176.5.peg.1414	1	1661476	1662696	-	1221	63	64	56	53	56	61	16	18	17	12	22	19	42.4539	44.7821	39.5286	39.0837	37.0271	39.8285	24.2306	25.1782	22.3484	18.4009	31.141	28.4473	32.7042	0.694854	0.175564	3.95784	7.56e-05	0.000144	Ammonium transporter	NA	K03320	amt, AMT, MEP; ammonium transporter, Amt family	290	02000	Transporters [BR:ko02000],	09183	09180
D|1136176.5.peg.1116	1	1265661	1266281	-	621	129.5	106.5	102	122	123.5	115	24.5	40	47.5	16	53.5	27	86.9294	74.1704	71.9986	89.9661	81.3274	75.0866	36.346	55.9515	61.7869	24.5345	75.0215	40.4251	64.462	0.6938	0.176427	3.93251	8.41e-05	0.00016	Anaerobic dimethyl sulfoxide reductase chain B (EC 1.8.99.-)	KEGG_ENZYME:1.8.99.-	K07307	dmsB; anaerobic dimethyl sulfoxide reductase subunit B	137	00920 02000	Sulfur metabolism [PATH:ko00920], Transporters [BR:ko02000],	09102 09183	09100 09180
D|1136176.5.peg.4009	2	1195702	1197591	-	1890	267	269.5	222.5	211.5	222	220.5	39.5	64	88	60.5	83.5	84.5	179.924	188.225	156.703	155.597	146.786	143.644	59.0622	89.5224	115.686	92.0043	117.486	125.767	130.867	0.692113	0.140701	4.91905	8.7e-07	2e-06	TPR domain protein in aerotolerance operon	NA	K07114	yfbK; Ca-activated chloride channel homolog	137	02000	Transporters [BR:ko02000],	09183	09180
D|1136176.5.peg.3538	2	661391	663295	+	1905	208	186	207	225	174	204	56	72	63	59	60	47	140.165	130.148	146.115	165.921	115.048	133.197	84.8072	100.713	82.8207	90.4709	84.93	70.3696	112.059	0.689161	0.116771	5.90182	3.6e-09	9.9e-09	PTS system%2C fructose-specific IIA component (EC 2.7.1.69) / PTS system%2C fructose-specific IIB component (EC 2.7.1.69) / PTS system%2C fructose-specific IIC component (EC 2.7.1.69)	KEGG_ENZYME:2.7.1.69,KEGG_ENZYME:2.7.1.69,KEGG_ENZYME:2.7.1.69	K02770	fruA; fructose PTS system EIIBC or EIIC component [EC:2.7.1.202]	403	00051 02060 02000	Fructose and mannose metabolism [PATH:ko00051], Phosphotransferase system (PTS) [PATH:ko02060], Transporters [BR:ko02000],	09101 09131 09183	09100 09130 09180
D|1136176.5.peg.318	1	358680	359384	+	705	126	129.5	131.5	109.5	126.5	133.5	32.5	31	34.5	46.5	44.5	36	84.9078	90.264	92.4687	80.3796	83.311	86.8393	48.4613	43.3624	44.6969	70.5366	62.282	53.9001	70.1175	0.687587	0.125735	5.46854	4.54e-08	1.15e-07	Thiamin ABC transporter%2C ATPase component	NA	K02062	thiQ; thiamine transport system ATP-binding protein [EC:7.6.2.15]	116	02010 02000	ABC transporters [PATH:ko02010], Transporters [BR:ko02000],	09131 09183	09130 09180
D|1136176.5.peg.1657	1	1922399	1923394	-	996	99	90.5	88	96	92	102.5	25.5	31	24.5	26	36	26.5	66.7133	62.9749	62.1164	70.793	60.8302	66.5986	37.8604	43.3624	31.5507	39.8685	50.958	38.9279	52.7129	0.686405	0.140753	4.87667	1.08e-06	2.46e-06	Vitamin B12 ABC transporter%2C permease component BtuC	NA	K06073	btuC; vitamin B12 transport system permease protein	157	02010 02000	ABC transporters [PATH:ko02010], Transporters [BR:ko02000],	09131 09183	09130 09180
D|1136176.5.peg.4287	2	1519420	1522563	+	3144	263	250	209.5	242	239	245	77	64.5	93	85.5	47.5	63	177.228	174.93	147.526	178.457	158.026	159.967	116.61	89.5224	122.259	130.339	66.5285	94.3252	134.643	0.686298	0.12425	5.52352	3.32e-08	8.53e-08	Cobalt-zinc-cadmium resistance protein CzcA%3B Cation efflux system protein CusA	NA	K07787	cusA, silA; copper/silver efflux system protein	939	02020 02000	Two-component system [PATH:ko02020], Transporters [BR:ko02000],	09132 09183	09130 09180
D|1136176.5.peg.4145	2	1357626	1359785	+	2160	1851	1660	1755	1765	1869.5	1861	470	550	615	466.5	580	523	1247.34	1161.54	1238.8	1301.56	1235.78	1215.1	711.775	769.333	808.488	714.566	820.99	783.049	1000.69	0.681688	0.048532	14.0462	8.13e-45	1.08e-43	Type I secretion system ATPase%2C LssB family LapB	NA	K12541	lapB; ATP-binding cassette, subfamily C, bacterial LapB	245	02010 02000 02044	ABC transporters [PATH:ko02010], Transporters [BR:ko02000], Secretion system [BR:ko02044],	09131 09183	09130 09180
D|1136176.5.peg.4039	2	1231528	1232250	-	723	15896	12073	11381.5	13305.5	12049	12670	5608.5	3757.5	2674.5	5969	1776.5	2890	10711.9	8447.73	8033.49	9811.47	7966.78	8272.59	8492.84	5255.24	3515.28	9152.89	2513.93	4326.98	7208.42	0.679	0.29695	2.28658	0.0222202	0.0315143	AttE component of AttEFGH ABC transport system	NA	K02003	ABC.CD.A; putative ABC transport system ATP-binding protein	55	02000	Transporters [BR:ko02000],	09183	09180
D|1136176.5.peg.1234	1	1443134	1443847	-	714	39	39	31	46	31	66	16	8	13	15	9	14	26.281	27.2891	21.8819	33.9217	20.4971	43.0932	24.2306	11.1903	17.09	23.0011	12.7395	20.9612	23.5147	0.674046	0.248334	2.71427	0.00664219	0.0101026	hypothetical protein	NA	K22110	kdgM, kdgN, nanC, ompL; oligogalacturonate-specific porin family protein	39	02000	Transporters [BR:ko02000],	09183	09180
D|1136176.5.peg.783	1	876111	877670	+	1560	8528	7286	7526	7009	7842	8042	1981	2370	2655	1965	2568	2340	5746.77	5098.16	5312.36	5168.63	5185.12	5250.84	3000.06	3315.13	3490.3	3013.14	3635	3503.51	4309.92	0.670092	0.0570326	11.7493	7.12e-32	5.8e-31	PTS system%2C N-acetylglucosamine-specific IIB component (EC 2.7.1.69) / PTS system%2C N-acetylglucosamine-specific IIC component (EC 2.7.1.69)	KEGG_ENZYME:2.7.1.69,KEGG_ENZYME:2.7.1.69	K02804	nagE; N-acetylglucosamine PTS system EIICBA or EIICB component [EC:2.7.1.193]	261	00520 02060 02000	Amino sugar and nucleotide sugar metabolism [PATH:ko00520], Phosphotransferase system (PTS) [PATH:ko02060], Transporters [BR:ko02000],	09101 09131 09183	09100 09130 09180
D|1136176.5.peg.4100	2	1302768	1303805	-	1038	72.5	71	62.5	62	75	85.5	18.5	19.5	26	24	19	22	48.5187	49.6802	43.7638	45.7205	49.5899	55.4988	27.2595	26.577	34.18	36.8017	26.8945	32.939	39.7853	0.668352	0.160349	4.1681	3.07e-05	6.1e-05	Hemin ABC transporter%2C permease protein	NA	K02015	ABC.FEV.P; iron complex transport system permease protein	174	02000	Transporters [BR:ko02000],	09183	09180
D|1136176.5.peg.2433	1	2780733	2781878	+	1146	614	658	588	548	636	674	161	177	206	216	161	199	413.757	460.416	415.05	404.11	420.522	440.073	243.821	247.585	270.811	331.215	227.895	297.948	347.767	0.659602	0.081513	8.09199	5.87e-16	2.46e-15	Sodium-dependent phosphate transporter	NA	K14683	SLC34A, NPT, nptA; solute carrier family 34 (sodium-dependent phosphate cotransporter)	286	04928 04978 02000 04147	Parathyroid hormone synthesis, secretion and action [PATH:ko04928], Mineral absorption [PATH:ko04978], Transporters [BR:ko02000], Exosome [BR:ko04147],	09152 09154 09183	09150 09180
D|1136176.5.peg.3775	2	920075	920860	-	786	44.5	48	43.5	42.5	44	43.5	17.5	18	8.5	14	15	8	29.6503	33.5866	30.3523	30.972	29.0927	28.0759	25.7451	25.1782	10.5169	21.4677	21.2325	11.9778	24.8207	0.653347	0.202633	3.22428	0.00126288	0.0021095	Spermidine Putrescine ABC transporter permease component potC (TC_3.A.1.11.1)	NA	K02053	ABC.SP.P; putative spermidine/putrescine transport system permease protein	229	02024 02000	Quorum sensing [PATH:ko02024], Transporters [BR:ko02000],	09145 09183	09140 09180
D|1136176.5.peg.751	1	843604	843861	-	258	1451	1490	1492	1400	1576	1523	380	474	463	384	442	570	977.787	1042.58	1053.16	1032.4	1042.05	994.408	575.478	663.025	608.666	588.827	625.651	853.419	838.121	0.649993	0.0849321	7.65309	1.96e-14	7.48e-14	Phosphocarrier protein of PTS system	NA	K02784	ptsH; phosphocarrier protein HPr	81	02060 02000	Phosphotransferase system (PTS) [PATH:ko02060], Transporters [BR:ko02000],	09131 09183	09130 09180
D|1136176.5.peg.2914	1	3358476	3359921	+	1446	478.5	458	459	411	461	468.5	139.5	134.5	119	149	151.5	139	322.11	320.472	323.993	303.083	304.812	305.57	210.504	187.438	156.439	228.477	213.74	208.114	257.063	0.647333	0.0766902	8.44088	3.15e-17	1.42e-16	Potassium uptake protein TrkH	NA	K03498	trkH, trkG, ktrB; trk system potassium uptake protein	320	02000	Transporters [BR:ko02000],	09183	09180
D|1136176.5.peg.2888	1	3321824	3322801	-	978	1733.5	1692.5	1695.5	1666.5	1808	1787.5	532.5	577.5	566	410	565.5	526.5	1167.82	1183.93	1196.45	1228.55	1195.45	1166.78	805.669	807.1	744.072	628.696	799.757	787.541	975.984	0.641843	0.0554261	11.5802	5.19e-31	4.16e-30	Peptide ABC transporter%2C permease component	NA	K02033	ABC.PE.P; peptide/nickel transport system permease protein	317	02024 02000	Quorum sensing [PATH:ko02024], Transporters [BR:ko02000],	09145 09183	09140 09180
D|1136176.5.peg.1546	1	1802992	1804968	-	1977	535.5	507	511	473	489	539	160	142	140.5	165	153	172.5	360.521	354.758	360.699	348.803	323.326	351.928	242.306	198.628	184.046	253.012	216.571	257.523	287.677	0.640257	0.0789934	8.1052	5.27e-16	2.21e-15	Ferric hydroxamate ABC transporter (TC 3.A.1.14.3)%2C permease component FhuB	NA	K23228	fhuB; ferric hydroxamate transport system permease protein	268	02010 02000	ABC transporters [PATH:ko02010], Transporters [BR:ko02000],	09131 09183	09130 09180
D|1136176.5.peg.924	1	1043011	1043982	+	972	702	625.5	566	570.5	619	622	197.5	189.5	221.5	171	170.5	188	473.058	437.325	399.521	420.334	409.282	406.121	298.34	264.371	290.53	262.212	240.635	281.478	348.601	0.63657	0.0710169	8.96363	3.14e-19	1.58e-18	Oligopeptide transport ATP-binding protein OppD (TC 3.A.1.5.1)	NA	K15583	oppD; oligopeptide transport system ATP-binding protein	279	02010 02024 01501 02000	ABC transporters [PATH:ko02010], Quorum sensing [PATH:ko02024], beta-Lactam resistance [PATH:ko01501], Transporters [BR:ko02000],	09131 09145 09175 09183	09130 09140 09160 09180
D|1136176.5.peg.4019	2	1207011	1208582	+	1572	1207.5	1134.5	1095	1067	1178	1236	363	352	395	316.5	346.5	354.5	813.363	793.483	772.926	786.835	778.892	807.018	549.733	492.373	519.273	484.556	489.763	530.018	651.519	0.633028	0.0468743	13.5048	1.47e-41	1.72e-40	Maltose/maltodextrin ABC transporter%2C permease protein MalF	NA	K10109	malF; maltose/maltodextrin transport system permease protein	339	02010 02000	ABC transporters [PATH:ko02010], Transporters [BR:ko02000],	09131 09183	09130 09180
D|1136176.5.peg.2104	1	2410881	2411993	-	1113	1560.5	1409	1427	1328	1477	1449	490	393	450	475	405	441	1051.24	985.906	1007.27	979.304	976.59	946.091	742.063	549.723	591.576	728.367	573.277	660.276	815.974	0.630779	0.0749063	8.4209	3.74e-17	1.68e-16	Glucose ABC transporter%2C ATP-binding subunit (EC 3.6.3.-)	KEGG_ENZYME:3.6.3.-	K10112	msmX, msmK, malK, sugC, ggtA, msiK; multiple sugar transport system ATP-binding protein	230	02010 02000	ABC transporters [PATH:ko02010], Transporters [BR:ko02000],	09131 09183	09130 09180
D|1136176.5.peg.4299	2	1533661	1534470	-	810	1511.5	1329	1272.5	1252	1283.5	1349.5	386	379	448	430.5	392.5	437	1018.22	929.929	897.864	923.259	848.317	880.799	584.564	530.14	588.947	659.364	554.876	654.288	755.881	0.623321	0.0668254	9.3276	1.08e-20	5.87e-20	Lysine-arginine-ornithine-binding periplasmic protein precursor (TC 3.A.1.3.1)	NA	K02030	ABC.PA.S; polar amino acid transport system substrate-binding protein	143	02000	Transporters [BR:ko02000],	09183	09180
D|1136176.5.peg.1214	1	1413089	1414591	-	1503	1155	1193	1185	1791	1304	1517.5	393.5	419.5	497.5	344.5	438	449	778.321	834.767	836.454	1320.73	862.202	990.49	595.165	586.092	653.363	527.491	619.989	672.254	773.11	0.621205	0.124562	4.98713	6.13e-07	1.43e-06	Tricarboxylate transport membrane protein TctA	NA	K07793	tctA; putative tricarboxylic transport membrane protein	328	02020 02000	Two-component system [PATH:ko02020], Transporters [BR:ko02000],	09132 09183	09130 09180
D|1136176.5.peg.925	1	1043979	1044965	+	987	1249	1137.5	1078	1074.5	1061	1145	387.5	332.5	395.5	331	332.5	315	841.665	795.582	760.926	791.997	701.531	747.601	586.079	464.397	519.273	507.557	469.946	471.626	638.182	0.620319	0.0680802	9.1116	8.12e-20	4.23e-19	Oligopeptide transport ATP-binding protein OppF (TC 3.A.1.5.1)	NA	K10823	oppF; oligopeptide transport system ATP-binding protein	262	02010 02024 01501 02000	ABC transporters [PATH:ko02010], Quorum sensing [PATH:ko02024], beta-Lactam resistance [PATH:ko01501], Transporters [BR:ko02000],	09131 09145 09175 09183	09130 09140 09160 09180
D|1136176.5.peg.604	1	692611	693900	+	1290	186	169	157	151	181	181	43	53	66	51	57	48	125.34	118.253	110.821	111.352	119.677	118.18	65.1199	74.1357	86.7645	78.2036	80.6835	71.8668	96.6997	0.620177	0.105268	5.89141	3.83e-09	1.05e-08	Xanthine/uracil/thiamine/ascorbate permease family protein	NA	K06901	pbuG, azgA, ghxP, ghxQ, adeQ; adenine/guanine/hypoxanthine permease	316	02000	Transporters [BR:ko02000],	09183	09180
D|1136176.5.peg.498	1	566292	567974	-	1683	860	968	988	882	1073	935	310	297	263	355	267	276	579.529	677.33	697.398	650.411	709.466	610.487	469.469	415.44	345.744	544.359	377.938	413.234	540.9	0.614975	0.100119	6.14247	8.12e-10	2.31e-09	(GlcNAc)2 ABC transporter%2C periplasmic substrate-binding protein	NA	K02035	ABC.PE.S; peptide/nickel transport system substrate-binding protein	463	02024 02000	Quorum sensing [PATH:ko02024], Transporters [BR:ko02000],	09145 09183	09140 09180
D|1136176.5.peg.3579	2	706733	708106	-	1374	334	293	274	320	317	326	91	126	86	108	77	92	225.073	205.018	193.408	235.977	209.6	212.854	137.812	176.247	113.057	165.608	108.993	137.745	176.783	0.613463	0.108001	5.68018	1.35e-08	3.55e-08	Maltoporin (maltose/maltodextrin high-affinity receptor%2C phage lambda receptor protein)	NA	K16077	scrY; sucrose porin	211	02000	Transporters [BR:ko02000],	09183	09180
D|1136176.5.peg.1545	1	1801204	1802859	-	1656	38	42	36	37	39	39	15	16	8	8	9	16	25.6071	29.3883	25.4113	27.2848	25.7867	25.4642	22.7162	22.3806	10.5169	12.2672	12.7395	23.9556	21.9599	0.612409	0.213338	2.87061	0.00409686	0.00637962	Type I secretion system ATPase%2C LssB family LapB	NA	K06159	yojI; multidrug/microcin transport system ATP-binding/permease protein	285	02010 02000	ABC transporters [PATH:ko02010], Transporters [BR:ko02000],	09131 09183	09130 09180
D|1136176.5.peg.4372	2	1606708	1608030	+	1323	87	98	80.5	73	76	86.5	30	19.5	22	35	29	21.5	58.6268	68.5726	56.4695	53.8322	50.2511	56.1517	45.4325	26.577	28.9215	53.6692	41.0495	31.4417	47.5829	0.609184	0.158601	3.84098	0.000123	0.00023	Probable Co/Zn/Cd efflux system membrane fusion protein	NA	K03585	acrA, mexA, adeI, smeD, mtrC, cmeA; membrane fusion protein, multidrug efflux system	40	01501 01503 03036 02000 01504	beta-Lactam resistance [PATH:ko01501], Cationic antimicrobial peptide (CAMP) resistance [PATH:ko01503], Chromosome and associated proteins [BR:ko03036], Transporters [BR:ko02000], Antimicrobial resistance genes [BR:ko01504],	09175 09182 09183	09160 09180
D|1136176.5.peg.3736	2	881515	882813	-	1299	105	95	113	92	100.5	99.5	32.5	34	36	28	29	30	70.7565	66.4735	79.7631	67.8433	66.1198	64.6398	48.4613	47.5588	47.3261	42.9353	41.0495	44.9168	57.3203	0.608344	0.134213	4.53269	5.82e-06	1.24e-05	Lipoprotein releasing system transmembrane protein LolC	NA	K02004	ABC.CD.P; putative ABC transport system permease protein	195	02000	Transporters [BR:ko02000],	09183	09180
D|1136176.5.peg.236	1	293611	294195	+	585	349.5	337.5	327.5	328	355.5	331	110	112.5	109.5	95	85.5	126	235.181	235.806	230.819	241.876	234.725	216.119	166.586	156.664	143.293	145.673	120.317	188.65	192.976	0.600784	0.0860121	6.98488	2.85e-12	9.41e-12	Glutathione-regulated potassium-efflux system ancillary protein KefG	NA	K11748	kefG; glutathione-regulated potassium-efflux system ancillary protein KefG	96	02000	Transporters [BR:ko02000],	09183	09180
D|1136176.5.peg.1215	1	1414600	1415061	-	462	754	732	767	1034	796	893.5	233.5	288.5	290.5	191.5	300	275	508.099	512.196	541.401	762.5	526.314	583.064	352.859	402.851	381.238	292.88	424.65	411.737	474.982	0.598232	0.118559	5.04585	4.52e-07	1.07e-06	hypothetical protein	NA	K07794	tctB; putative tricarboxylic transport membrane protein	10	02020 02000	Two-component system [PATH:ko02020], Transporters [BR:ko02000],	09132 09183	09130 09180
D|1136176.5.peg.4429	2	1674600	1675475	+	876	130	105	107.5	115.5	115.5	112.5	30.5	43.5	33.5	31.5	37.5	42.5	87.6033	73.4707	75.5279	84.8042	76.0378	73.1278	45.4325	60.1479	43.3823	47.5355	52.3735	62.8835	65.1939	0.594608	0.129092	4.60606	4.1e-06	8.86e-06	ABC transporter in pyoverdin gene cluster%2C permease component	NA	K09816	znuB; zinc transport system permease protein	230	02010 02000	ABC transporters [PATH:ko02010], Transporters [BR:ko02000],	09131 09183	09130 09180
D|1136176.5.peg.4428	2	1673866	1674600	+	735	68.5	68.5	57	67	68.5	78	18.5	31	12	24	18.5	25.5	45.8233	47.581	40.2345	49.4076	44.9615	50.9283	27.2595	43.3624	15.7754	36.8017	25.479	37.4306	38.7537	0.593954	0.171171	3.46995	0.000521	0.000912	ABC transporter in pyoverdin gene cluster%2C ATP-binding component	NA	K09817	znuC; zinc transport system ATP-binding protein [EC:7.2.2.20]	107	02010 02000	ABC transporters [PATH:ko02010], Transporters [BR:ko02000],	09131 09183	09130 09180
D|1136176.5.peg.4184	2	1399310	1401349	+	2040	141	134	122	116	113	126	54	42	29	44	29	39	95.0159	93.7626	86.1159	85.5416	74.7154	82.2688	81.7784	58.7491	38.1238	67.4698	41.0495	58.3918	71.9152	0.592417	0.145096	4.08294	4.45e-05	8.7e-05	Ferric siderophore receptor PsuA	NA	K16090	fiu; catecholate siderophore receptor	107	02000	Transporters [BR:ko02000],	09183	09180
D|1136176.5.peg.4147	2	1361138	1362451	+	1314	1775	1614.5	1735	1642	1781	1748	477.5	558.5	639.5	504.5	538.5	563	1196.12	1129.35	1224.68	1210.86	1177.59	1141.32	722.376	780.523	840.039	772.836	761.539	842.938	983.347	0.583766	0.0469855	12.4244	1.93e-35	1.81e-34	Agglutination protein	NA	K12543	lapE; outer membrane protein, adhesin transport system	150	02000 02044	Transporters [BR:ko02000], Secretion system [BR:ko02044],	09183	09180
D|1136176.5.peg.3657	2	803005	804318	-	1314	216	204	220	214	206	200	51	74	84	67	69	57	145.556	142.743	155.291	157.809	136.207	130.585	77.2352	103.51	110.428	102.738	97.6695	85.3419	120.426	0.583129	0.101555	5.74198	9.36e-09	2.5e-08	DNA-damage-inducible protein	NA	K03327	TC.MATE, SLC47A, norM, mdtK, dinF; multidrug resistance protein, MATE family	183	02000	Transporters [BR:ko02000],	09183	09180
D|1136176.5.peg.485	1	547760	548989	+	1230	1289	1228	1220	1134	1257	1266	332	348	460	359	442	420	868.62	859.257	861.159	836.243	831.126	826.606	502.786	486.778	604.723	550.492	625.651	628.835	706.856	0.579791	0.0644268	8.99922	2.27e-19	1.15e-18	Ammonium transporter	NA	K03320	amt, AMT, MEP; ammonium transporter, Amt family	331	02000	Transporters [BR:ko02000],	09183	09180
D|1136176.5.peg.1609	1	1878592	1879890	+	1299	147	150	150	120	155.5	133	41.5	49	38	40	50	56	99.0591	104.958	105.88	88.4913	102.486	86.8393	62.091	68.5406	49.9553	61.3362	70.775	83.8446	82.0214	0.571899	0.121076	4.72346	2.32e-06	5.1e-06	TRAP-type C4-dicarboxylate transport system%2C large permease component	NA	K11690	dctM; C4-dicarboxylate transporter, DctM subunit	65	02020 02000	Two-component system [PATH:ko02020], Transporters [BR:ko02000],	09132 09183	09130 09180
D|1136176.5.peg.3462	2	573947	575239	+	1293	87	84	90	94	113	92	31	36	31	27	28	27	58.6268	58.7765	63.5281	69.3182	74.7154	60.0693	46.9469	50.3563	40.753	41.4019	39.634	40.4251	53.7126	0.569019	0.140409	4.05259	5.07e-05	9.84e-05	Glycerol-3-phosphate ABC transporter%2C periplasmic glycerol-3-phosphate-binding protein (TC 3.A.1.1.3)	NA	K05813	ugpB; sn-glycerol 3-phosphate transport system substrate-binding protein	274	02010 02000	ABC transporters [PATH:ko02010], Transporters [BR:ko02000],	09131 09183	09130 09180
D|1136176.5.peg.894	1	1006242	1007567	-	1326	187	166	173	182	181	209	50	57	59	53	68	66	126.014	116.154	122.115	134.212	119.677	136.462	75.7208	79.7309	77.5622	81.2704	96.254	98.8169	105.332	0.568229	0.103798	5.47436	4.39e-08	1.12e-07	Histidine permease YuiF	NA	K07084	yuiF; putative amino acid transporter	312	02000	Transporters [BR:ko02000],	09183	09180
D|1136176.5.peg.4005	2	1189603	1190526	+	924	122.5	111.5	129.5	136	123.5	125	29	42	41	48.5	28.5	52	82.2123	77.669	91.057	100.29	81.3274	81.6159	43.918	58.7491	53.8992	73.6034	39.634	77.8557	71.8193	0.567713	0.140624	4.0371	5.41e-05	0.000105	Phosphate transport system permease protein PstA (TC 3.A.1.7.1)	NA	K02038	pstA; phosphate transport system permease protein	175	02010 02000	ABC transporters [PATH:ko02010], Transporters [BR:ko02000],	09131 09183	09130 09180
D|1136176.5.peg.1509	1	1761468	1762127	+	660	207	194	202	195	214	203	69	60	70	58	75	62	139.491	135.746	142.585	143.798	141.496	132.544	104.495	83.9272	92.023	88.9375	106.162	92.828	117.003	0.556349	0.0954347	5.82963	5.56e-09	1.51e-08	Glutathione S-transferase domain protein	NA	K00799	GST, gst; glutathione S-transferase [EC:2.5.1.18]	86	00480 00980 00982 00983 04212 05200 05204 05225 05418 01524 02000	Glutathione metabolism [PATH:ko00480], Metabolism of xenobiotics by cytochrome P450 [PATH:ko00980], Drug metabolism - cytochrome P450 [PATH:ko00982], Drug metabolism - other enzymes [PATH:ko00983], Longevity regulating pathway - worm [PATH:ko04212], Pathways in cancer [PATH:ko05200], Chemical carcinogenesis [PATH:ko05204], Hepatocellular carcinoma [PATH:ko05225], Fluid shear stress and atheroscle…	09106 09111 09149 09161 09162 09166 09176 09183	09100 09150 09160 09180
D|1136176.5.peg.2528	1	2898514	2899263	+	750	102	104	93	98	102	101	27	45	37	26	38	23	68.7349	72.7709	65.6457	72.2679	67.4422	65.9456	40.8892	62.9454	48.6407	39.8685	53.789	34.4362	57.7814	0.547757	0.135198	4.05151	5.09e-05	9.88e-05	cAMP-dependent Kef-type K+ transport system	NA	K10716	kch, trkA, mthK, pch; voltage-gated potassium channel	78	02000	Transporters [BR:ko02000],	09183	09180
D|1136176.5.peg.1617	1	1886881	1887879	-	999	528.5	453	481.5	480	533	546.5	178	165	190	164	141.5	156.5	355.804	316.973	339.523	353.965	352.419	356.498	269.566	230.8	249.777	251.478	199.585	233.567	292.496	0.534013	0.0713123	7.48837	6.97e-14	2.56e-13	Ribose ABC transport system%2C permease protein RbsC (TC 3.A.1.2.1)	NA	K02057	ABC.SS.P; simple sugar transport system permease protein	322	02000	Transporters [BR:ko02000],	09183	09180
D|1136176.5.peg.3819	2	974173	976023	-	1851	2344	2253	2229	2229	2373	2429	696	779	835	748	765	767	1579.55	1576.47	1573.38	1643.73	1569.02	1585.96	1054.03	1089.66	1097.7	1146.99	1082.86	1148.37	1345.64	0.525653	0.034989	15.0234	5.16e-51	8.12e-50	Lipid A export ATP-binding/permease protein MsbA	NA	K18893	vcaM; ATP-binding cassette, subfamily B, multidrug efflux pump	436	02010 02000	ABC transporters [PATH:ko02010], Transporters [BR:ko02000],	09131 09183	09130 09180
D|1136176.5.peg.4149	2	1363089	1364033	+	945	1521	1367.5	1439.5	1424.5	1604	1576	483.5	469.5	534.5	433.5	514	524	1024.96	956.518	1015.74	1050.1	1060.56	1029.01	731.463	656.031	702.004	663.964	727.567	784.546	866.872	0.525313	0.0506782	10.3657	3.55e-25	2.28e-24	Phosphate ABC transporter%2C periplasmic phosphate-binding protein PstS (TC 3.A.1.7.1)	NA	K02040	pstS; phosphate transport system substrate-binding protein	35	02010 02020 05152 02000	ABC transporters [PATH:ko02010], Two-component system [PATH:ko02020], Tuberculosis [PATH:ko05152], Transporters [BR:ko02000],	09131 09132 09171 09183	09130 09160 09180
D|1136176.5.peg.1949	1	2237025	2237717	-	693	268.5	268	260.5	269.5	286	293.5	75	98	100	62	107	107.5	180.598	187.525	183.526	198.368	189.103	191.308	113.581	137.081	131.461	95.0711	151.458	160.203	159.94	0.51569	0.0948796	5.4352	5.47e-08	1.38e-07	Lipoprotein releasing system ATP-binding protein LolD	NA	K09810	lolD; lipoprotein-releasing system ATP-binding protein [EC:3.6.3.-]	148	02010 02000	ABC transporters [PATH:ko02010], Transporters [BR:ko02000],	09131 09183	09130 09180
D|1136176.5.peg.3869	2	1030877	1031794	+	918	372	370	318	318	364	377	117	126	120	106	134	104	250.68	258.897	224.466	234.502	240.676	246.153	177.187	176.247	157.754	162.541	189.677	155.711	206.208	0.514535	0.0772089	6.66419	2.66e-11	8.36e-11	Potassium efflux system KefA protein / Small-conductance mechanosensitive channel	NA	K03442	mscS; small conductance mechanosensitive channel	135	02000	Transporters [BR:ko02000],	09183	09180
D|1136176.5.peg.4148	2	1362451	1363089	+	639	1135	1050	1053.5	1006.5	1178	1125	348	328	386	329	432.5	364	764.844	734.707	743.279	741.852	778.892	734.543	527.016	458.802	507.441	504.49	611.496	544.99	637.696	0.512487	0.0591853	8.65903	4.76e-18	2.25e-17	Dfam020323	NA	K03286	TC.OOP; OmpA-OmpF porin, OOP family	15	02000	Transporters [BR:ko02000],	09183	09180
D|1136176.5.peg.1948	1	2235780	2237024	-	1245	245.5	255.5	250.5	218.5	276	255.5	67	86	124.5	61.5	103	66.5	165.098	178.429	176.467	160.759	182.491	166.496	101.466	120.296	163.012	93.5377	145.796	98.8169	146.055	0.502866	0.11805	4.25977	2.05e-05	4.14e-05	Lipoprotein releasing system transmembrane protein LolE	NA	K09808	lolC_E; lipoprotein-releasing system permease protein	263	02010 02000	ABC transporters [PATH:ko02010], Transporters [BR:ko02000],	09131 09183	09130 09180
D|1136176.5.peg.1211	1	1409983	1410801	-	819	108	96.5	107	87.5	98.5	110	23	25.5	42	37	47.5	30	72.7781	67.1732	75.5279	64.1562	64.7974	71.822	34.8315	34.9697	55.2138	56.736	66.5285	44.9168	59.1209	0.502819	0.139816	3.5963	0.000323	0.000578	Phosphonate ABC transporter ATP-binding protein (TC 3.A.1.9.1)	NA	K02041	phnC; phosphonate transport system ATP-binding protein [EC:7.3.2.2]	165	02010 02000	ABC transporters [PATH:ko02010], Transporters [BR:ko02000],	09131 09183	09130 09180
D|1136176.5.peg.46	1	57829	58500	+	672	221	326	238	197	226	280	45	86	123	57	118	77	148.926	228.109	167.997	145.273	149.431	182.82	68.1487	120.296	161.698	87.4041	167.029	115.286	145.201	0.502504	0.193305	2.59954	0.00933479	0.0139287	Putative preQ0 transporter	NA	K09125	yhhQ; queuosine precursor transporter	225	02000	Transporters [BR:ko02000],	09183	09180
D|1136176.5.peg.3971	2	1141397	1142611	-	1215	808	757	734	726	827	802	223	271	273	244	278	279	544.488	529.689	518.107	535.372	546.811	523.647	337.715	379.071	358.89	374.151	393.509	417.726	454.931	0.500661	0.0551744	9.07416	1.15e-19	5.88e-19	Sodium/dicarboxylate symporter	NA	K07862	sstT; serine/threonine transporter	399	02000	Transporters [BR:ko02000],	09183	09180
D|1136176.5.peg.1682	1	1949665	1950036	+	372	95	105.5	87.5	89.5	100	102	30.5	35	29	30.5	50	21.5	64.0178	73.4707	61.4105	65.631	66.1198	66.5986	45.4325	48.9576	38.1238	46.0021	70.775	31.4417	56.4984	0.499377	0.143653	3.47627	0.000508	0.000892	Antiholin-like protein LrgA	NA	K06518	cidA; holin-like protein	41	02000	Transporters [BR:ko02000],	09183	09180
D|1136176.5.peg.4006	2	1190602	1191351	+	750	348	329	329	313	367	333	98	121	123	126	105	108	234.507	230.208	232.231	230.815	242.66	217.425	148.413	169.253	161.698	193.209	148.627	161.7	197.562	0.499048	0.0777152	6.4215	1.35e-10	4.04e-10	Phosphate transport ATP-binding protein PstB (TC 3.A.1.7.1)	NA	K02036	pstB; phosphate transport system ATP-binding protein [EC:7.3.2.1]	205	02010 02000	ABC transporters [PATH:ko02010], Transporters [BR:ko02000],	09131 09183	09130 09180
D|1136176.5.peg.4101	2	1303949	1304839	-	891	37	44	42	36	37	31	10	14	23	7	9	14	24.9332	30.7877	29.6465	26.5474	24.4643	20.2407	15.1442	19.583	30.2361	10.7338	12.7395	20.9612	22.1681	0.497401	0.219915	2.26179	0.0237104	0.0334696	Periplasmic hemin-binding protein	NA	K02016	ABC.FEV.S; iron complex transport system substrate-binding protein	105	02000	Transporters [BR:ko02000],	09183	09180
D|1136176.5.peg.3814	2	969757	971250	+	1494	1404	1387	1431	1317	1496	1522	454	464	557	470	437	513	946.115	970.513	1010.1	971.192	989.153	993.755	687.544	649.037	732.24	720.7	618.573	768.077	838.083	0.494384	0.05179	9.54594	1.35e-21	7.57e-21	Proline/sodium symporter PutP (TC 2.A.21.2.1) @ Propionate/sodium symporter	NA	K11928	putP; sodium/proline symporter	358	02000	Transporters [BR:ko02000],	09183	09180
D|1136176.5.peg.2953	1	3396330	3397067	-	738	331	289.5	282.5	276.5	313.5	304.5	124.5	98.5	87.5	102.5	115	80.5	223.051	202.219	199.055	203.53	206.955	198.49	187.787	137.081	114.371	156.407	162.782	119.778	175.959	0.494236	0.100357	4.92479	8.45e-07	1.95e-06	ABC-type polar amino acid transport system%2C ATPase component	NA	K16963	yxeO; putative S-methylcysteine transport system ATP-binding protein	175	02010 02000	ABC transporters [PATH:ko02010], Transporters [BR:ko02000],	09131 09183	09130 09180
D|1136176.5.peg.2913	1	3357003	3358379	+	1377	759	725	684	678	728	764	223	244	321	197	277	215	511.468	507.297	482.814	499.976	481.352	498.836	337.715	341.304	421.991	302.081	392.093	321.904	424.903	0.490368	0.0723115	6.78133	1.19e-11	3.82e-11	Trk system potassium uptake protein TrkA	NA	K03499	trkA, ktrA; trk system potassium uptake protein	389	02000	Transporters [BR:ko02000],	09183	09180
D|1136176.5.peg.1730	1	1995401	1996033	+	633	167.5	156	143.5	114	160	163	42.5	53.5	60.5	48	57.5	47.5	112.537	109.156	100.939	84.0667	105.792	106.427	63.6054	74.1357	78.8769	73.6034	80.6835	70.3696	88.3493	0.487105	0.11372	4.28337	1.84e-05	3.74e-05	glutathione S-transferase family protein	NA	K00799	GST, gst; glutathione S-transferase [EC:2.5.1.18]	11	00480 00980 00982 00983 04212 05200 05204 05225 05418 01524 02000	Glutathione metabolism [PATH:ko00480], Metabolism of xenobiotics by cytochrome P450 [PATH:ko00980], Drug metabolism - cytochrome P450 [PATH:ko00982], Drug metabolism - other enzymes [PATH:ko00983], Longevity regulating pathway - worm [PATH:ko04212], Pathways in cancer [PATH:ko05200], Chemical carcinogenesis [PATH:ko05204], Hepatocellular carcinoma [PATH:ko05225], Fluid shear stress and atheroscle…	09106 09111 09149 09161 09162 09166 09176 09183	09100 09150 09160 09180
D|1136176.5.peg.317	1	357074	358669	+	1596	299	286.5	284.5	263.5	264.5	292.5	72.5	99	105.5	98.5	101.5	101	201.488	200.12	200.467	193.943	174.556	190.655	109.038	138.48	138.035	150.274	142.965	151.22	165.937	0.483448	0.0860902	5.6156	1.96e-08	5.13e-08	Thiamin ABC transporter%2C transmembrane component	NA	K02063	thiP; thiamine transport system permease protein	320	02010 02000	ABC transporters [PATH:ko02010], Transporters [BR:ko02000],	09131 09183	09130 09180
D|1136176.5.peg.2348	1	2678592	2680220	-	1629	281	238.5	255	243	254.5	227.5	84	80.5	106	73	92.5	77	189.358	166.534	179.996	179.195	167.944	148.214	127.211	111.903	139.349	111.939	130.226	115.286	147.263	0.482902	0.0948499	5.09122	3.56e-07	8.47e-07	Urea ABC transporter%2C permease protein UrtB	NA	K11960	urtB; urea transport system permease protein	318	02010 02000	ABC transporters [PATH:ko02010], Transporters [BR:ko02000],	09131 09183	09130 09180
D|1136176.5.peg.4331	2	1564991	1566028	+	1038	195.5	156.5	152	145	157	163.5	53	62	50	63.5	46	56	131.405	109.156	107.292	106.927	103.808	106.427	80.264	86.7248	65.7307	96.6045	65.113	83.8446	95.2748	0.481524	0.114783	4.19506	2.73e-05	5.45e-05	Ferric iron ABC transporter%2C iron-binding protein	NA	K02055	ABC.SP.S; putative spermidine/putrescine transport system substrate-binding protein	204	02024 02000	Quorum sensing [PATH:ko02024], Transporters [BR:ko02000],	09145 09183	09140 09180
D|1136176.5.peg.4276	2	1504872	1506995	+	2124	408	392	382	387	385	401	159	123	143	125	124	130	274.94	274.29	269.642	285.384	254.561	261.824	240.792	172.051	187.99	191.676	175.522	194.639	231.943	0.481461	0.0780978	6.16484	7.06e-10	2.01e-09	Ferrichrome-iron receptor	NA	K02014	TC.FEV.OM; iron complex outermembrane recepter protein	293	02000	Transporters [BR:ko02000],	09183	09180
D|1136176.5.peg.2887	1	3320883	3321821	-	939	2594.5	2519.5	2525.5	2504.5	2609	2621.5	935.5	903.5	931	751	912.5	844.5	1748.02	1762.6	1782.32	1846.52	1725.07	1711.32	1415.98	1263.11	1223.91	1151.59	1290.94	1263.66	1515.42	0.474976	0.0466875	10.1735	2.6e-24	1.62e-23	Dipeptide transport system permease protein DppC (TC 3.A.1.5.2)	NA	K02034	ABC.PE.P1; peptide/nickel transport system permease protein	343	02024 02000	Quorum sensing [PATH:ko02024], Transporters [BR:ko02000],	09145 09183	09140 09180
D|1136176.5.peg.1212	1	1410941	1411897	-	957	471	445	487	430	520	487	177	184	152	139	186	138	317.393	311.376	343.758	317.094	343.823	317.975	268.051	257.377	199.821	213.143	263.283	206.617	279.976	0.471407	0.0798429	5.90418	3.54e-09	9.76e-09	Phosphonate ABC transporter phosphate-binding periplasmic component (TC 3.A.1.9.1)	NA	K02044	phnD; phosphonate transport system substrate-binding protein	214	02010 02000	ABC transporters [PATH:ko02010], Transporters [BR:ko02000],	09131 09183	09130 09180
D|1136176.5.peg.1071	1	1214985	1216190	-	1206	598	542	523	563	579	555	179	193	215	203	188	180	402.975	379.249	369.169	415.172	382.834	362.374	271.08	269.966	282.642	311.281	266.114	269.501	331.863	0.468821	0.0652061	7.18983	6.49e-13	2.25e-12	Benzoate transport protein	NA	K05782	benE; benzoate membrane transport protein	222	02000	Transporters [BR:ko02000],	09183	09180
D|1136176.5.peg.1879	1	2163900	2164787	+	888	834	788.5	800.5	755.5	833.5	866.5	275.5	248.5	352	229.5	306	278.5	562.009	551.38	564.695	556.758	550.778	565.435	416.464	346.899	462.744	351.15	433.143	416.229	481.474	0.463839	0.0655408	7.0771	1.47e-12	4.97e-12	Peptide transport system permease protein SapC	NA	K19228	sapC; cationic peptide transport system permease protein	186	02010 01503 02000	ABC transporters [PATH:ko02010], Cationic antimicrobial peptide (CAMP) resistance [PATH:ko01503], Transporters [BR:ko02000],	09131 09175 09183	09130 09160 09180
D|1136176.5.peg.1322	1	1537007	1537624	-	618	864	765.5	772.5	758.5	778.5	808	276.5	297	272	304.5	244	253.5	582.225	535.286	544.93	558.97	514.412	527.565	417.979	415.44	357.575	466.155	345.382	378.798	470.393	0.456681	0.0705672	6.47158	9.7e-11	2.92e-10	T1SS peptidoglycan-associated lipoprotein LapL	NA	K03286	TC.OOP; OmpA-OmpF porin, OOP family	20	02000	Transporters [BR:ko02000],	09183	09180
D|1136176.5.peg.4427	2	1672931	1673866	+	936	165.5	141.5	130	130	165.5	159	52	51.5	71	63	37.5	37.5	111.189	98.6606	91.7629	95.8656	109.098	103.815	78.7496	71.3382	93.3376	96.6045	52.3735	55.3973	88.1826	0.447193	0.13009	3.43756	0.000587	0.00102126	Cation ABC transporter%2C periplasmic cation-binding protein	NA	K09815	znuA; zinc transport system substrate-binding protein	187	02010 02000	ABC transporters [PATH:ko02010], Transporters [BR:ko02000],	09131 09183	09130 09180
D|1136176.5.peg.4419	2	1666999	1667619	+	621	531.5	516.5	469.5	414	499	517.5	136.5	220	205	129.5	191.5	153.5	357.826	361.056	331.052	305.295	329.938	337.563	205.96	307.733	269.496	197.809	270.36	229.076	291.93	0.446945	0.0985374	4.53579	5.74e-06	1.22e-05	Ferric siderophore transport system%2C periplasmic binding protein TonB	NA	K03832	tonB; periplasmic protein TonB	75	02000	Transporters [BR:ko02000],	09183	09180
D|1136176.5.peg.2071	1	2359017	2360480	+	1464	336	305	322	300	298	321	94	133	110	98	121	103	226.421	213.415	227.29	221.228	197.037	209.59	142.355	186.039	144.608	150.274	171.275	154.214	186.979	0.446747	0.0829591	5.38515	7.24e-08	1.81e-07	PTS system%2C N-acetylglucosamine-specific IIA component / PTS system%2C N-acetylglucosamine-specific IIB component (EC 2.7.1.69) / PTS system%2C N-acetylglucosamine-specific IIC component	KEGG_ENZYME:2.7.1.69	K02804	nagE; N-acetylglucosamine PTS system EIICBA or EIICB component [EC:2.7.1.193]	260	00520 02060 02000	Amino sugar and nucleotide sugar metabolism [PATH:ko00520], Phosphotransferase system (PTS) [PATH:ko02060], Transporters [BR:ko02000],	09101 09131 09183	09100 09130 09180
D|1136176.5.peg.3331	2	424809	426578	-	1770	770.5	762.5	741	713	796.5	827.5	243.5	251	285.5	250	289	294.5	518.881	533.187	523.048	525.786	526.314	539.971	368.003	351.096	374.665	383.351	409.079	440.184	457.797	0.446306	0.0557753	8.00186	1.23e-15	5.06e-15	Lipid A export ATP-binding/permease protein MsbA	NA	K18890	mdlB, smdB; ATP-binding cassette, subfamily B, multidrug efflux pump	296	02010 02000	ABC transporters [PATH:ko02010], Transporters [BR:ko02000],	09131 09183	09130 09180
D|1136176.5.peg.4334	2	1567694	1568776	+	1083	136	121	130	123	111	158	43.5	44	61.5	40.5	35	50.5	91.6465	84.6662	91.7629	90.7036	73.393	103.162	65.1199	61.5466	80.1915	61.3362	49.5425	74.8613	77.3277	0.445126	0.12796	3.47864	0.000504	0.000885	Putrescine transport ATP-binding protein PotA (TC 3.A.1.11.1)	NA	K02052	ABC.SP.A; putative spermidine/putrescine transport system ATP-binding protein	167	02024 02000	Quorum sensing [PATH:ko02024], Transporters [BR:ko02000],	09145 09183	09140 09180
D|1136176.5.peg.1411	1	1658099	1659133	+	1035	1227	1235	1202	1162	1325	1387	427	450	450	475	474	363	826.84	864.155	848.454	856.891	876.088	905.61	646.655	629.454	591.576	728.367	670.947	543.493	749.044	0.443435	0.0617843	7.17715	7.12e-13	2.46e-12	ABC transporter%2C periplasmic spermidine putrescine-binding protein PotD (TC 3.A.1.11.1)	NA	K11069	potD; spermidine/putrescine transport system substrate-binding protein	233	02010 02000	ABC transporters [PATH:ko02010], Transporters [BR:ko02000],	09131 09183	09130 09180
D|1136176.5.peg.1776	1	2054783	2055937	-	1155	116	98	107	93	101	93	33	41	31	28	42	39	78.1691	68.5726	75.5279	68.5807	66.781	60.7222	49.9757	57.3503	40.753	42.9353	59.451	58.3918	60.6009	0.438185	0.133164	3.29057	0.001	0.00169389	Tyrosine-specific transport protein	NA	K03834	tyrP; tyrosine-specific transport protein	133	02000	Transporters [BR:ko02000],	09183	09180
D|1136176.5.peg.637	1	727339	728148	-	810	7775	7569	7330	6747	7883	7862	2515	2757	2946	2492	2590	2602	5239.35	5296.19	5174.01	4975.42	5212.23	5133.31	3808.75	3856.46	3872.85	3821.24	3666.14	3895.78	4495.98	0.437079	0.0262456	16.6534	2.86e-62	6e-61	Methionine ABC transporter substrate-binding protein	NA	K02073	metQ; D-methionine transport system substrate-binding protein	195	02010 02000	ABC transporters [PATH:ko02010], Transporters [BR:ko02000],	09131 09183	09130 09180
D|1136176.5.peg.2239	1	2555103	2555993	+	891	4774	4372	4450	4255	4743	4719	1593	1754	1749	1477	1600	1468	3217.06	3059.18	3141.11	3137.75	3136.06	3081.16	2412.46	2453.47	2299.26	2264.84	2264.8	2197.93	2722.09	0.434106	0.0329473	13.1758	1.21e-39	1.32e-38	Magnesium and cobalt efflux protein CorC	NA	K06189	corC; magnesium and cobalt transporter	191	02000	Transporters [BR:ko02000],	09183	09180
D|1136176.5.peg.1323	1	1537624	1538931	-	1308	1319	1128.5	1104.5	1208.5	1256.5	1199	450.5	439	449	436.5	371	407.5	888.836	789.285	779.278	890.812	830.465	782.859	681.487	614.068	590.262	668.564	525.15	609.371	720.87	0.428716	0.0685494	6.25412	4e-10	1.16e-09	Agglutination protein	NA	K12543	lapE; outer membrane protein, adhesin transport system	254	02000 02044	Transporters [BR:ko02000], Secretion system [BR:ko02044],	09183	09180
D|1136176.5.peg.622	1	709498	710262	+	765	1435.5	1376.5	1250	1170.5	1289.5	1323.5	481	439	502	475	478.5	403.5	967.005	962.816	882.335	862.79	852.285	863.822	728.434	614.068	659.936	728.367	676.609	603.382	783.487	0.427461	0.0626006	6.82838	8.59e-12	2.77e-11	Flagellar motor rotation protein MotA	NA	K02556	motA; chemotaxis protein MotA	266	02020 02030 02040 02000 02035	Two-component system [PATH:ko02020], Bacterial chemotaxis [PATH:ko02030], Flagellar assembly [PATH:ko02040], Transporters [BR:ko02000], Bacterial motility proteins [BR:ko02035],	09132 09142 09183	09130 09140 09180
D|1136176.5.peg.2122	1	2433290	2434612	+	1323	5407	4931	5124	5366	5759	5517	1832	1786	2130	2101	1900	1663	3643.62	3450.32	3616.87	3957.04	3807.84	3602.2	2774.41	2498.23	2800.13	3221.68	2689.45	2489.89	3212.64	0.422587	0.0648838	6.51299	7.37e-11	2.24e-10	Long-chain fatty acid transport protein	NA	K06076	fadL; long-chain fatty acid transport protein	221	02000	Transporters [BR:ko02000],	09183	09180
D|1136176.5.peg.1412	1	1659353	1660390	+	1038	1073	1217	1155	1008	1165	1242	371	403	432	416	423	394	723.064	851.56	815.278	743.327	770.296	810.935	561.848	563.711	567.913	637.896	598.756	589.907	686.208	0.422307	0.0577188	7.31663	2.54e-13	9.02e-13	ABC transporter%2C periplasmic spermidine putrescine-binding protein PotD (TC 3.A.1.11.1)	NA	K11069	potD; spermidine/putrescine transport system substrate-binding protein	247	02010 02000	ABC transporters [PATH:ko02010], Transporters [BR:ko02000],	09131 09183	09130 09180
D|1136176.5.peg.1210	1	1409186	1409986	-	801	85.5	87	74.5	85.5	83	91.5	30.5	27	27	33	35.5	28	57.2791	60.8757	52.2342	62.6813	54.8795	59.4164	45.4325	37.7673	35.4946	50.6023	49.5425	41.9223	50.6773	0.419038	0.139958	2.99403	0.00275318	0.00439487	Phosphonate ABC transporter permease protein phnE2 (TC 3.A.1.9.1)	NA	K02042	phnE; phosphonate transport system permease protein	216	02010 02000	ABC transporters [PATH:ko02010], Transporters [BR:ko02000],	09131 09183	09130 09180
D|1136176.5.peg.986	1	1118188	1118928	+	741	612.5	494	486	547	520.5	540	199	180	225	178	183.5	179.5	412.409	345.662	343.052	403.373	343.823	352.581	301.369	251.782	295.788	272.946	259.036	268.003	320.819	0.416164	0.0782477	5.31855	1.05e-07	2.59e-07	Arginine/ornithine ABC transporter%2C permease protein AotQ	NA	K10024	aotQ; arginine/ornithine transport system permease protein	188	02010 02000	ABC transporters [PATH:ko02010], Transporters [BR:ko02000],	09131 09183	09130 09180
D|1136176.5.peg.3905	2	1068819	1070003	-	1185	266	257	222	257	246	290	84	98	101	77	101	90	179.25	179.828	156.703	189.519	162.655	189.349	127.211	137.081	132.776	118.072	142.965	134.75	154.18	0.413213	0.0892303	4.63086	3.64e-06	7.89e-06	Putative drug efflux protein	NA	K19577	ydhP; MFS transporter, DHA1 family, inner membrane transport protein	310	02000	Transporters [BR:ko02000],	09183	09180
D|1136176.5.peg.3609	2	737307	738650	+	1344	146	129	141	119	152	152	50	63	55	44	45	45	98.3852	90.264	99.5274	87.7539	100.502	99.2449	75.7208	88.1236	72.3038	67.4698	63.6975	67.3752	84.1973	0.405064	0.111203	3.64256	0.00027	0.000489	Xanthine/uracil/thiamine/ascorbate permease family protein	NA	K06901	pbuG, azgA, ghxP, ghxQ, adeQ; adenine/guanine/hypoxanthine permease	290	02000	Transporters [BR:ko02000],	09183	09180
D|1136176.5.peg.1409	1	1656323	1657180	+	858	2181.5	2124.5	1885.5	1764.5	2018.5	2263.5	640.5	681.5	954	587	788.5	779	1469.71	1486.21	1330.56	1300.82	1334.3	1477.57	969.226	952.574	1254.14	900.108	1115.41	1166.34	1229.75	0.401061	0.0839569	4.77698	1.78e-06	3.96e-06	Spermidine Putrescine ABC transporter permease component PotB (TC 3.A.1.11.1)	NA	K11071	potB; spermidine/putrescine transport system permease protein	271	02010 02000	ABC transporters [PATH:ko02010], Transporters [BR:ko02000],	09131 09183	09130 09180
D|1136176.5.peg.3465	2	577301	578599	+	1299	103.5	101.5	88	105	102.5	111.5	33.5	34.5	35.5	44.5	29.5	45	69.4087	70.6718	62.1164	77.4299	67.4422	72.4749	49.9757	47.5588	46.0115	67.4698	41.0495	67.3752	61.582	0.40102	0.13292	3.01701	0.00255278	0.0040862	Glycerol-3-phosphate ABC transporter%2C ATP-binding protein UgpC (TC 3.A.1.1.3)	NA	K05816	ugpC; sn-glycerol 3-phosphate transport system ATP-binding protein [EC:7.6.2.10]	132	02010 02000	ABC transporters [PATH:ko02010], Transporters [BR:ko02000],	09131 09183	09130 09180
D|1136176.5.peg.3737	2	882801	883499	-	699	20	12	27	14	14.5	21	5	6	4.5	13.5	7	4	13.4774	8.39665	19.0584	10.324	9.25678	13.7115	7.57208	8.39272	5.25846	19.9343	9.9085	5.9889	10.94	0.395889	0.324066	1.22163	0.221848	0.264055	ABC transporter%2C ATP-binding protein	NA	K02003	ABC.CD.A; putative ABC transport system ATP-binding protein	122	02000	Transporters [BR:ko02000],	09183	09180
D|1136176.5.peg.506	1	578260	581373	+	3114	899.5	873	871.5	822	924.5	917.5	286	325	365.5	289.5	348	318	605.81	610.856	614.811	606.165	610.947	598.734	433.123	454.606	479.834	443.154	492.594	476.118	535.563	0.390462	0.0484555	8.05816	7.74e-16	3.23e-15	RND multidrug efflux transporter%3B Acriflavin resistance protein	NA	K18989	vexF; multidrug efflux pump	750	02000	Transporters [BR:ko02000],	09183	09180
D|1136176.5.peg.3032	2	89374	90756	+	1383	243	233	227	196	242	242	72	76	89	95	86	85	163.751	163.035	160.232	144.536	160.01	158.008	109.038	106.308	117.001	145.673	121.733	127.264	139.716	0.389135	0.0898084	4.33295	1.47e-05	3.01e-05	Multi antimicrobial extrusion protein (Na(+)/drug antiporter)%2C MATE family of MDR efflux pumps	NA	K03327	TC.MATE, SLC47A, norM, mdtK, dinF; multidrug resistance protein, MATE family	215	02000	Transporters [BR:ko02000],	09183	09180
D|1136176.5.peg.1889	1	2175130	2175924	+	795	647	578	562	589	560	615	197	241	212	215	238	198	435.995	404.439	396.698	434.345	370.271	401.55	298.34	337.108	278.698	329.682	336.889	296.451	360.039	0.380487	0.069362	5.48552	4.12e-08	1.05e-07	YbbM seven transmembrane helix protein	NA	K02069	ABC.X2.P; putative ABC transport system permease protein	142	02000	Transporters [BR:ko02000],	09183	09180
D|1136176.5.peg.623	1	710275	711222	+	948	962.5	902.5	797	818.5	901.5	975.5	355	346	340	319	291.5	311.5	648.264	631.148	562.577	603.216	595.74	636.604	537.617	483.98	446.969	489.156	411.91	465.637	542.735	0.377073	0.0650426	5.79733	6.74e-09	1.82e-08	Flagellar motor rotation protein MotB	NA	K02557	motB; chemotaxis protein MotB	204	02030 02040 02000 02035	Bacterial chemotaxis [PATH:ko02030], Flagellar assembly [PATH:ko02040], Transporters [BR:ko02000], Bacterial motility proteins [BR:ko02035],	09142 09183	09140 09180
D|1136176.5.peg.4487	2	1730494	1732641	+	2148	1995	1836	1861	1796	2019	2006	729	721	760	691	680	647	1344.37	1284.69	1313.62	1324.42	1334.96	1309.77	1104.01	1008.53	999.107	1059.58	962.54	968.705	1167.86	0.375646	0.0399626	9.39994	5.46e-21	2.99e-20	TonB-dependent heme and hemoglobin receptor HutA%3B TonB-dependent hemin %2C ferrichrome receptor	NA	K16087	TC.FEV.OM3, tbpA, hemR, lbpA, hpuB, bhuR, hugA, hmbR; hemoglobin/transferrin/lactoferrin receptor protein	211	02000	Transporters [BR:ko02000],	09183	09180
D|1136176.5.peg.2653	1	3062125	3062760	-	636	1154	1175	994	929	1133	1058	388	356	414	425	389	391	777.648	822.172	701.633	685.07	749.138	690.797	587.593	497.968	544.25	651.697	550.629	585.415	653.667	0.374752	0.072253	5.18667	2.14e-07	5.18e-07	Sodium-type flagellar protein MotX	NA	K21217	motX; sodium-type polar flagellar protein MotX	151	02040 02000 02035	Flagellar assembly [PATH:ko02040], Transporters [BR:ko02000], Bacterial motility proteins [BR:ko02035],	09142 09183	09140 09180
D|1136176.5.peg.1780	1	2059163	2060653	-	1491	216	190	199	193	204	198	64	74	83	79	72	72	145.556	132.947	140.468	142.323	134.884	129.28	96.9226	103.51	109.113	121.139	101.916	107.8	122.155	0.366193	0.0926946	3.95053	7.8e-05	0.000149	Sulfate permease	NA	K03321	TC.SULP; sulfate permease, SulP family	311	02000	Transporters [BR:ko02000],	09183	09180
D|1136176.5.peg.1881	1	2165785	2166567	+	783	268.5	256.5	245.5	267.5	275	317.5	69	119.5	120.5	87	100.5	109.5	180.598	179.128	172.938	196.893	181.83	206.978	104.495	166.456	157.754	133.406	141.55	163.198	165.435	0.364085	0.0984635	3.69766	0.000218	0.000398	Peptide transport system ATP-binding protein SapF	NA	K19230	sapF; cationic peptide transport system ATP-binding protein	178	02010 01503 02000	ABC transporters [PATH:ko02010], Cationic antimicrobial peptide (CAMP) resistance [PATH:ko01503], Transporters [BR:ko02000],	09131 09175 09183	09130 09160 09180
D|1136176.5.peg.1774	1	2051576	2052829	+	1254	193	195	182	193	199	227	74	64	80	77	65	81	130.057	136.446	128.468	142.323	131.578	148.214	112.067	89.5224	105.169	118.072	92.0075	121.275	121.267	0.360976	0.0969123	3.72476	0.000195	0.000359	Serine transporter	NA	K03837	sdaC; serine transporter	270	02000	Transporters [BR:ko02000],	09183	09180
D|1136176.5.peg.636	1	726043	727248	+	1206	94	75	100	93	95	99	37	41	26	33	41	29	63.3439	52.479	70.5868	68.5807	62.8138	64.6398	56.0334	57.3503	34.18	50.6023	58.0355	43.4195	56.8388	0.355987	0.139274	2.55602	0.0105878	0.0156824	Maltoporin (maltose/maltodextrin high-affinity receptor%2C phage lambda receptor protein)	NA	K02024	lamB; maltoporin	169	02000	Transporters [BR:ko02000],	09183	09180
D|1136176.5.peg.43	1	54226	55140	-	915	131	139	139	153	140	133	39	81	47	49	42	54	88.2771	97.2612	98.1157	112.826	92.5678	86.8393	59.0622	113.302	61.7869	75.1368	59.451	80.8502	85.4564	0.355292	0.14372	2.47211	0.0134317	0.0196564	Protein rarD	NA	K05786	rarD; chloramphenicol-sensitive protein RarD	184	02000	Transporters [BR:ko02000],	09183	09180
D|1136176.5.peg.337	1	373875	374183	+	309	4105.5	3347.5	3444.5	3715.5	3708	3778	1394	1443	1380.5	1493.5	1311	1216	2766.24	2341.96	2431.01	2739.54	2451.72	2466.76	2111.09	2018.45	1814.17	2289.37	1855.72	1820.63	2258.89	0.352089	0.0707411	4.97715	6.45e-07	1.51e-06	Uncharacterized protein YrbB	NA	K07122	mlaB; phospholipid transport system transporter-binding protein	22	02010 02000	ABC transporters [PATH:ko02010], Transporters [BR:ko02000],	09131 09183	09130 09180
D|1136176.5.peg.4018	2	1205745	1206929	+	1185	4155	3844	4014	3874	4306	4244	1462	1550	1525	1544	1503	1592	2799.94	2689.73	2833.35	2856.79	2847.12	2771.02	2214.07	2168.12	2004.79	2367.58	2127.5	2383.58	2505.3	0.341435	0.0449371	7.59806	3.01e-14	1.13e-13	Maltose/maltodextrin ABC transporter%2C substrate binding periplasmic protein MalE	NA	K10108	malE; maltose/maltodextrin transport system substrate-binding protein	307	02010 02030 02000	ABC transporters [PATH:ko02010], Bacterial chemotaxis [PATH:ko02030], Transporters [BR:ko02000],	09131 09142 09183	09130 09140 09180
D|1136176.5.peg.2494	1	2859051	2860247	-	1197	837.5	835	750	741	897	833	266	296	382.5	258	312.5	337	564.03	584.267	529.401	546.434	593.095	543.888	402.834	414.041	502.183	395.618	441.636	504.565	501.833	0.33564	0.0696536	4.81871	1.44e-06	3.25e-06	Cell division protein FtsW	NA	K03588	ftsW, spoVE; cell division protein FtsW	303	04112 03036 02000	Cell cycle - Caulobacter [PATH:ko04112], Chromosome and associated proteins [BR:ko03036], Transporters [BR:ko02000],	09143 09182 09183	09140 09180
D|1136176.5.peg.4552	3	50070	51134	-	1065	68.5	70	75	75	70	55.5	24	39	32.5	16	26.5	20.5	45.8233	48.9804	52.9401	55.3071	46.2839	35.911	36.346	54.5527	42.0677	24.5345	36.803	29.9445	42.4578	0.334211	0.170154	1.96416	0.0495112	0.0663868	Iron(III) dicitrate transport system permease protein FecD (TC 3.A.1.14.1)	NA	K02015	ABC.FEV.P; iron complex transport system permease protein	135	02000	Transporters [BR:ko02000],	09183	09180
D|1136176.5.peg.1880	1	2164787	2165788	+	1002	832	792	798	749.5	860	897.5	307.5	286.5	391	270	357	276.5	560.661	554.179	563.283	552.333	568.63	585.676	464.925	400.053	514.014	414.019	505.333	413.234	508.028	0.318188	0.0655433	4.85462	1.21e-06	2.73e-06	Peptide transport system ATP-binding protein SapD	NA	K19229	sapD; cationic peptide transport system ATP-binding protein	254	02010 01503 02000	ABC transporters [PATH:ko02010], Cationic antimicrobial peptide (CAMP) resistance [PATH:ko01503], Transporters [BR:ko02000],	09131 09175 09183	09130 09160 09180
D|1136176.5.peg.1818	1	2104333	2106786	-	2454	446.5	403.5	363	382.5	427	460.5	182.5	153.5	174	136	163	145	300.547	281.987	256.23	281.697	282.332	300.346	275.624	214.014	228.743	208.543	230.726	217.098	256.491	0.310331	0.076384	4.06278	4.85e-05	9.44e-05	AttF component of AttEFGH ABC transport system / AttG component of AttEFGH ABC transport system	NA	K02004	ABC.CD.P; putative ABC transport system permease protein	277	02000	Transporters [BR:ko02000],	09183	09180
D|1136176.5.peg.701	1	792464	793702	-	1239	439	418	386	377	413	436	163	172	163	147	164	142	295.83	292.483	272.465	278.01	273.075	284.676	246.85	240.591	214.282	225.41	232.142	212.606	255.702	0.307421	0.0673403	4.56518	4.99e-06	1.07e-05	Uracil permease	NA	K02824	uraA, pyrP; uracil permease	398	02000	Transporters [BR:ko02000],	09183	09180
D|1136176.5.peg.1410	1	1657180	1657950	+	771	1247.5	1169.5	1086.5	1027	1124	1267.5	375	413.5	588	405	451	441	840.318	817.973	766.573	757.338	743.187	827.259	567.906	577.699	772.993	621.029	638.39	660.276	715.912	0.307005	0.073959	4.15102	3.31e-05	6.56e-05	Spermidine Putrescine ABC transporter permease component potC (TC_3.A.1.11.1)	NA	K11070	potC; spermidine/putrescine transport system permease protein	209	02010 02000	ABC transporters [PATH:ko02010], Transporters [BR:ko02000],	09131 09183	09130 09180
D|1136176.5.peg.3778	2	922699	923781	-	1083	113	98	111	97	92	110	34	34	59	40	35	38	76.1475	68.5726	78.3514	71.5305	60.8302	71.822	51.4901	47.5588	77.5622	61.3362	49.5425	56.8946	64.3032	0.305348	0.131713	2.31829	0.0204334	0.0290867	Ferric iron ABC transporter%2C iron-binding protein	NA	K02055	ABC.SP.S; putative spermidine/putrescine transport system substrate-binding protein	238	02024 02000	Quorum sensing [PATH:ko02024], Transporters [BR:ko02000],	09145 09183	09140 09180
D|1136176.5.peg.1566	1	1825452	1827482	-	2031	133	115	110	102	116	142	36	53	46	48	48	46	89.6249	80.4679	77.6455	75.2176	76.699	92.7156	54.5189	74.1357	60.4723	73.6034	67.944	68.8724	74.3264	0.30406	0.119466	2.54515	0.010923	0.016148	Colicin I receptor precursor	NA	K16089	TC.FEV.OM2, cirA, cfrA, hmuR; outer membrane receptor for ferrienterochelin and colicins	174	02000	Transporters [BR:ko02000],	09183	09180
D|1136176.5.peg.911	1	1028258	1029631	+	1374	954	908	843	823	896	948	352	375	374	310	313	357	642.873	635.346	595.047	606.903	592.434	618.975	533.074	524.545	491.666	475.355	443.051	534.51	557.815	0.298947	0.055233	5.41247	6.22e-08	1.56e-07	Melibiose carrier protein%2C Na+/melibiose symporter	NA	K11104	melB; melibiose permease	233	02000	Transporters [BR:ko02000],	09183	09180
D|1136176.5.peg.909	1	1023577	1024818	-	1242	92	85	77	92	93	98	40	36	32	38	32	30	61.9962	59.4763	54.3518	67.8433	61.4914	63.9868	60.5766	50.3563	42.0677	58.2694	45.296	44.9168	55.8857	0.298528	0.133605	2.23441	0.0254561	0.0357108	Maltoporin (maltose/maltodextrin high-affinity receptor%2C phage lambda receptor protein)	NA	K02024	lamB; maltoporin	153	02000	Transporters [BR:ko02000],	09183	09180
D|1136176.5.peg.3782	2	926462	927103	-	642	37	40	37	40	34	40	19	15	19	14	12	10	24.9332	27.9888	26.1171	29.4971	22.4807	26.1171	28.7739	20.9818	24.9777	21.4677	16.986	14.9723	23.7744	0.289917	0.198308	1.46195	0.143754	0.178615	Amino acid ABC transporter%2C permease protein%2C 3-TM region%2C His/Glu/Gln/Arg/opine	NA	K02029	ABC.PA.P; polar amino acid transport system permease protein	128	02000	Transporters [BR:ko02000],	09183	09180
D|1136176.5.peg.4273	2	1501915	1502700	-	786	128	106	110	104	125	120	48	58	52	37	38	38	86.2555	74.1704	77.6455	76.6925	82.6498	78.3512	72.6919	81.1297	68.3599	56.736	53.789	56.8946	72.1138	0.286172	0.119817	2.38842	0.0169212	0.0244394	Ferrichrome transport ATP-binding protein FhuC (TC 3.A.1.14.3)	NA	K10829	fhuC; ferric hydroxamate transport system ATP-binding protein [EC:7.2.2.16]	172	02010 02000	ABC transporters [PATH:ko02010], Transporters [BR:ko02000],	09131 09183	09130 09180
D|1136176.5.peg.438	1	491496	493280	+	1785	534.5	547.5	554.5	509.5	565.5	551	205	218	235	181	245.5	192.5	359.847	382.747	391.051	375.351	373.577	359.763	310.455	304.936	308.934	277.546	346.797	287.467	339.873	0.286149	0.0623158	4.59191	4.39e-06	9.47e-06	Oxaloacetate decarboxylase alpha chain (EC 4.1.1.3)	KEGG_ENZYME:4.1.1.3	K01571	oadA; oxaloacetate decarboxylase (Na+ extruding) subunit alpha [EC:7.2.4.2]	458	00620 02000	Pyruvate metabolism [PATH:ko00620], Transporters [BR:ko02000],	09101 09183	09100 09180
D|1136176.5.peg.3409	2	514480	515718	+	1239	359.5	356	332.5	329	377	384.5	115.5	167.5	155	142.5	132	125	241.92	249.101	234.348	242.614	249.272	250.724	174.158	233.597	203.765	217.743	186.846	187.153	222.603	0.285724	0.0742897	3.84608	0.00012	0.000225	Cytosine permease	NA	K10974	codB; cytosine permease	401	02000	Transporters [BR:ko02000],	09183	09180
D|1136176.5.peg.1950	1	2237710	2238930	-	1221	375	382.5	324	301	363	385	113	173	169.5	104.5	153	124	252.702	267.293	228.701	221.966	240.015	251.377	171.129	241.99	222.17	159.474	216.571	185.656	221.587	0.284602	0.0967855	2.94054	0.00327638	0.00516083	Lipoprotein releasing system transmembrane protein LolC	NA	K09808	lolC_E; lipoprotein-releasing system permease protein	233	02010 02000	ABC transporters [PATH:ko02010], Transporters [BR:ko02000],	09131 09183	09130 09180
D|1136176.5.peg.4367	2	1599710	1601077	-	1368	232	218	185	221	241	269	55	96	105	68	114	98	156.338	152.539	130.586	162.971	159.349	175.637	83.2928	134.284	138.035	104.272	161.367	146.728	142.116	0.284511	0.129921	2.18988	0.0285329	0.0396912	Anaerobic C4-dicarboxylate transporter DcuC	NA	K03326	TC.DCUC, dcuC, dcuD; C4-dicarboxylate transporter, DcuC family	320	02000	Transporters [BR:ko02000],	09183	09180
D|1136176.5.peg.2392	1	2726803	2727780	-	978	486	451.5	440	469	455.5	522	190.5	181	216	172.5	186.5	162	327.501	315.574	310.582	345.853	300.845	340.828	287.739	253.181	283.957	263.746	263.283	242.551	294.637	0.282848	0.0679229	4.16425	3.12e-05	6.2e-05	Phosphate ABC transporter%2C periplasmic phosphate-binding protein PstS (TC 3.A.1.7.1)	NA	K02040	pstS; phosphate transport system substrate-binding protein	190	02010 02020 05152 02000	ABC transporters [PATH:ko02010], Two-component system [PATH:ko02020], Tuberculosis [PATH:ko05152], Transporters [BR:ko02000],	09131 09132 09171 09183	09130 09160 09180
D|1136176.5.peg.4103	2	1305399	1306100	-	702	72.5	59	57	62.5	44	65.5	23.5	23.5	31	22	18	24.5	48.5187	41.2835	40.2345	45.7205	29.0927	42.4403	34.8315	32.1721	40.753	33.7349	25.479	35.9334	37.5162	0.281677	0.169548	1.66134	0.096646	0.123692	Ferric siderophore transport system%2C biopolymer transport protein ExbB	NA	K03561	exbB; biopolymer transport protein ExbB	104	02000	Transporters [BR:ko02000],	09183	09180
D|1136176.5.peg.1945	1	2230914	2232662	-	1749	2644	2592	2655	2443.5	2848.5	2703.5	900.5	1103.5	1191	914.5	1144	1003	1781.72	1813.68	1874.08	1801.54	1883.09	1764.86	1362.97	1542.86	1565.71	1401.53	1619.33	1501.72	1659.42	0.278737	0.0461379	6.0414	1.53e-09	4.28e-09	Lipid A export ATP-binding/permease protein MsbA	NA	K11085	msbA; ATP-binding cassette, subfamily B, bacterial MsbA [EC:3.6.3.-]	416	02010 02000	ABC transporters [PATH:ko02010], Transporters [BR:ko02000],	09131 09183	09130 09180
D|1136176.5.peg.3525	2	645308	646519	-	1212	119.5	111	110	126	96	122.5	42	42.5	39	46.5	58.5	42	80.1907	77.669	77.6455	92.9159	63.475	79.6571	63.6054	58.7491	51.27	70.5366	82.099	62.8835	71.7247	0.278494	0.130568	2.13293	0.0329303	0.0453803	Putative transport protein	NA	K08163	mdtL; MFS transporter, DHA1 family, multidrug resistance protein	241	02000	Transporters [BR:ko02000],	09183	09180
D|1136176.5.peg.3654	2	799591	801102	-	1512	125.5	114	108.5	119	113.5	112.5	36	53	45.5	44	44	50.5	84.2339	79.7682	76.2338	87.7539	74.7154	73.1278	54.5189	74.1357	59.1576	67.4698	62.282	74.8613	72.3549	0.27728	0.118931	2.33144	0.0197301	0.0281633	Oligopeptide ABC transporter%2C periplasmic oligopeptide-binding protein OppA (TC 3.A.1.5.1)	NA	K02035	ABC.PE.S; peptide/nickel transport system substrate-binding protein	356	02024 02000	Quorum sensing [PATH:ko02024], Transporters [BR:ko02000],	09145 09183	09140 09180
D|1136176.5.peg.2955	1	3397866	3398615	-	750	225	239	232	190	252	238	88	82	97	88	94	94	151.621	167.233	163.761	140.111	166.622	155.397	133.269	114.701	127.518	134.94	133.057	140.739	144.081	0.271604	0.0883926	3.0727	0.00212129	0.00341911	Amino acid ABC transporter%2C periplasmic amino acid-binding portion	NA	K16961	yxeM; putative S-methylcysteine transport system substrate-binding protein	173	02010 02000	ABC transporters [PATH:ko02010], Transporters [BR:ko02000],	09131 09183	09130 09180
D|1136176.5.peg.91	1	115275	116243	+	969	607	544	562.5	518	587	612	222.5	232.5	253	207	237	204	409.04	380.648	396.698	381.987	388.123	399.591	336.2	324.519	332.597	317.415	335.473	305.434	358.977	0.271304	0.0570476	4.75575	1.98e-06	4.37e-06	Cell division protein FtsX	NA	K09811	ftsX; cell division transport system permease protein	126	02010 03036 02000	ABC transporters [PATH:ko02010], Chromosome and associated proteins [BR:ko03036], Transporters [BR:ko02000],	09131 09182 09183	09130 09180
D|1136176.5.peg.2680	1	3093968	3094456	+	489	158	148	165	170	172	180	74	66	70	50	71	62	106.472	103.559	116.468	125.363	113.726	117.527	112.067	92.32	92.023	76.6702	100.5	92.828	104.127	0.269301	0.102789	2.61995	0.00879432	0.0131901	Arginine/ornithine antiporter ArcD	NA	K07507	mgtC; putative Mg2+ transporter-C (MgtC) family protein	73	02000	Transporters [BR:ko02000],	09183	09180
D|1136176.5.peg.4392	2	1633248	1635632	-	2385	502	440.5	458	475.5	524	478	180.5	192	224	172	192	180	338.283	307.877	323.288	350.278	346.468	312.099	272.595	268.567	294.474	263.746	271.776	269.501	301.579	0.268119	0.0653632	4.10198	4.1e-05	8.04e-05	P pilus assembly protein%2C porin PapC	NA	K07347	fimD, fimC, mrkC, htrE, cssD; outer membrane usher protein	82	05133 02000 02044 02035	Pertussis [PATH:ko05133], Transporters [BR:ko02000], Secretion system [BR:ko02044], Bacterial motility proteins [BR:ko02035],	09171 09183	09160 09180
D|1136176.5.peg.1250	1	1465361	1466779	+	1419	107.5	111	98.5	89.5	117	108.5	40.5	39	60	22.5	47	42	72.1042	77.669	69.1751	65.631	77.3602	70.5161	60.5766	54.5527	78.8769	33.7349	66.5285	62.8835	65.8007	0.267706	0.134919	1.9842	0.0472334	0.0635344	Transporter%2C putative	NA	K14445	SLC13A2_3_5; solute carrier family 13 (sodium-dependent dicarboxylate transporter), member 2/3/5	298	02000	Transporters [BR:ko02000],	09183	09180
D|1136176.5.peg.3928	2	1091632	1092831	-	1200	274	248	263	265	270	251	115	96	91	103	93	123	184.641	173.531	185.643	195.418	178.524	163.885	174.158	134.284	119.63	157.941	131.641	184.159	165.288	0.26737	0.099769	2.67989	0.00736456	0.0111465	Permease of the major facilitator superfamily	NA	K08217	mef; MFS transporter, DHA3 family, macrolide efflux protein	12	02000 01504	Transporters [BR:ko02000], Antimicrobial resistance genes [BR:ko01504],	09183	09180
D|1136176.5.peg.4528	3	32292	33572	+	1281	465	449	443	439	508	518	177	176	201	183	214	168	313.35	314.175	312.7	323.731	335.889	338.216	268.051	246.187	264.237	280.613	302.917	251.534	295.967	0.265218	0.0654145	4.05442	5.03e-05	9.77e-05	Tryptophan-specific transport protein	NA	K03835	mtr; tryptophan-specific transport protein	258	02000	Transporters [BR:ko02000],	09183	09180
D|1136176.5.peg.2570	1	2948307	2950649	+	2343	3523	3351	3536	3295	3706	3682	1281	1498	1578	1242	1405	1419	2374.05	2344.76	2495.95	2429.82	2450.4	2404.08	1939.97	2095.38	2074.46	1904.49	1988.78	2124.56	2218.89	0.257054	0.0357092	7.19853	6.09e-13	2.11e-12	Outer membrane protein Imp%2C required for envelope biogenesis / Organic solvent tolerance protein precursor	NA	K04744	lptD, imp, ostA; LPS-assembly protein	318	02000	Transporters [BR:ko02000],	09183	09180
D|1136176.5.peg.1044	1	1188374	1189726	+	1353	1710.5	1651.5	1608	1520	1711.5	1714.5	623.5	656	753	533	734	678.5	1152.32	1155.24	1135.04	1120.89	1131.31	1119.12	943.481	917.605	989.905	817.305	1038.98	1015.12	1044.69	0.250967	0.0524223	4.7874	1.69e-06	3.77e-06	tolB protein precursor%2C periplasmic protein involved in the tonb-independent uptake of group A colicins	NA	K03641	tolB; TolB protein	311	02000	Transporters [BR:ko02000],	09183	09180
D|1136176.5.peg.639	1	728888	729922	-	1035	1021	957.5	968.5	947	1047	1020.5	369.5	473	383.5	417	389	356	688.023	669.633	683.28	698.344	692.275	665.986	558.819	661.626	503.497	639.43	550.629	533.012	628.713	0.250264	0.0641024	3.90414	9.46e-05	0.000179	Methionine ABC transporter ATP-binding protein	NA	K02071	metN; D-methionine transport system ATP-binding protein	253	02010 02000	ABC transporters [PATH:ko02010], Transporters [BR:ko02000],	09131 09183	09130 09180
D|1136176.5.peg.2349	1	2680456	2681742	-	1287	125	125	102	119	118	111	57	49	44	45	53	33	84.2339	87.4651	71.9986	87.7539	78.0214	72.4749	86.3217	68.5406	57.843	69.0032	75.0215	49.4084	74.0072	0.248369	0.125191	1.98393	0.047264	0.0635572	Urea ABC transporter%2C urea binding protein	NA	K11959	urtA; urea transport system substrate-binding protein	350	02010 02000	ABC transporters [PATH:ko02010], Transporters [BR:ko02000],	09131 09183	09130 09180
D|1136176.5.peg.4311	2	1543083	1544669	-	1587	167	142	159	169	168	192	53	80	88	60	55	67	112.537	99.3603	112.233	124.625	111.081	125.362	80.264	111.903	115.686	92.0043	77.8525	100.314	105.269	0.240628	0.111005	2.16771	0.0301808	0.0418707	High-affinity choline uptake protein BetT	NA	K05020	opuD, betL; glycine betaine transporter	461	02000	Transporters [BR:ko02000],	09183	09180
D|1136176.5.peg.3967	2	1136085	1136921	-	837	326	356	283	292	317.5	332.5	159	154	111	129	121	96.5	219.682	249.101	199.761	215.329	209.6	216.772	240.792	215.413	145.922	197.809	171.275	143.734	202.099	0.235022	0.117692	1.99693	0.0458332	0.0618302	Tetrathionate reductase subunit B	NA	K08358	ttrB; tetrathionate reductase subunit B	152	00920 02020 02000	Sulfur metabolism [PATH:ko00920], Two-component system [PATH:ko02020], Transporters [BR:ko02000],	09102 09132 09183	09100 09130 09180
D|1136176.5.peg.488	1	552172	553200	+	1029	145.5	152	163.5	144.5	166	173	56	52	94.5	57	68.5	58.5	97.7113	106.358	115.057	106.19	109.759	112.956	84.8072	72.7369	123.574	87.4041	96.254	86.8391	99.9704	0.226534	0.11124	2.03645	0.0417057	0.0566406	Ferric iron ABC transporter%2C ATP-binding protein	NA	K02010	afuC, fbpC; iron(III) transport system ATP-binding protein [EC:7.2.2.7]	191	02010 02000	ABC transporters [PATH:ko02010], Transporters [BR:ko02000],	09131 09183	09130 09180
D|1136176.5.peg.987	1	1118931	1119608	+	678	324.5	304	292	292	318.5	335	125	128	157	86	113.5	155.5	218.334	212.715	206.113	215.329	210.261	218.731	189.302	179.045	206.394	131.873	159.951	232.07	198.343	0.22058	0.0995612	2.21552	0.0267243	0.0373183	Histidine ABC transporter%2C permease protein HisM (TC 3.A.1.3.1)	NA	K10023	aotM; arginine/ornithine transport system permease protein	208	02010 02000	ABC transporters [PATH:ko02010], Transporters [BR:ko02000],	09131 09183	09130 09180
D|1136176.5.peg.736	1	831329	832375	+	1047	1137	1085	1046	941	1111	1169	405	426	544	409	428	444	766.192	759.197	738.338	693.919	734.591	763.272	613.338	595.883	715.15	627.162	605.834	664.768	689.804	0.220521	0.0538263	4.0969	4.19e-05	8.21e-05	Outer membrane protein NlpB%2C lipoprotein component of the protein assembly complex (forms a complex with YaeT%2C YfiO%2C and YfgL)%3B Lipoprotein-34 precursor	NA	K07287	bamC; outer membrane protein assembly factor BamC	170	02000	Transporters [BR:ko02000],	09183	09180
D|1136176.5.peg.4031	2	1220897	1222060	-	1164	1060.5	1022	1041	1029	1128.5	1111.5	397.5	449.5	416.5	458	411	483	714.304	715.114	734.809	758.813	745.832	725.402	601.223	628.056	546.88	702.299	581.77	723.16	681.472	0.217765	0.0655521	3.32201	0.000894	0.00152241	Membrane fusion protein of RND family multidrug efflux pump	NA	K03585	acrA, mexA, adeI, smeD, mtrC, cmeA; membrane fusion protein, multidrug efflux system	109	01501 01503 03036 02000 01504	beta-Lactam resistance [PATH:ko01501], Cationic antimicrobial peptide (CAMP) resistance [PATH:ko01503], Chromosome and associated proteins [BR:ko03036], Transporters [BR:ko02000], Antimicrobial resistance genes [BR:ko01504],	09175 09182 09183	09160 09180
D|1136176.5.peg.237	1	294182	295978	+	1797	3371.5	3251.5	3192.5	2910	3211.5	3416	1153	1311.5	1522.5	1196	1323.5	1442	2271.62	2274.79	2253.13	2145.91	2123.11	2230.4	1746.12	1833.81	2000.84	1833.95	1872.71	2159	2062.12	0.216226	0.0516046	4.19006	2.79e-05	5.56e-05	Glutathione-regulated potassium-efflux system protein KefB	NA	K11747	kefB; glutathione-regulated potassium-efflux system protein KefB	367	02000	Transporters [BR:ko02000],	09183	09180
D|1136176.5.peg.4438	2	1681398	1682549	-	1152	59	58.5	63.5	56	66	66.5	39	22	28	18	19	25	39.7584	40.5838	44.4697	41.2959	43.6391	43.0932	59.0622	30.7733	36.8092	27.6013	26.8945	37.4306	39.2843	0.215225	0.162829	1.32179	0.186239	0.225488	Permease of the major facilitator superfamily	NA	K08219	UMF2; MFS transporter, UMF2 family, putative MFS family transporter protein	49	02000	Transporters [BR:ko02000],	09183	09180
D|1136176.5.peg.750	1	841743	843467	-	1725	6419	6439	6425	5820	6728	6630	2277	2593	3003	2432	2720	2804	4325.58	4505.5	4535.2	4291.83	4448.54	4328.91	3448.32	3627.06	3947.79	3729.24	3850.16	4198.22	4103.03	0.213277	0.0464857	4.58802	4.47e-06	9.64e-06	Phosphoenolpyruvate-protein phosphotransferase of PTS system (EC 2.7.3.9)	KEGG_ENZYME:2.7.3.9	K08483	ptsI; phosphoenolpyruvate-protein phosphotransferase (PTS system enzyme I) [EC:2.7.3.9]	447	02060 02000	Phosphotransferase system (PTS) [PATH:ko02060], Transporters [BR:ko02000],	09131 09183	09130 09180
D|1136176.5.peg.930	1	1050919	1051884	+	966	612	583	508	536	584	648	252	265	224	230	229	226	412.409	407.937	358.581	395.261	386.14	423.097	381.633	370.679	294.474	352.683	324.149	338.373	370.451	0.211562	0.0709397	2.98228	0.00286109	0.00455146	ABC-type uncharacterized transport system%2C periplasmic component	NA	K01989	K01989; putative tryptophan/tyrosine transport system substrate-binding protein	165	02000	Transporters [BR:ko02000],	09183	09180
D|1136176.5.peg.883	1	994077	995513	-	1437	194	185	222	180	191	194	94	75	72	101	68	71	130.731	129.448	156.703	132.737	126.289	126.668	142.355	104.909	94.6522	154.874	96.254	106.303	125.16	0.20423	0.120996	1.68791	0.0914278	0.117369	Na+/H+ antiporter	NA	K03315	nhaC; Na+:H+ antiporter, NhaC family	331	02000	Transporters [BR:ko02000],	09183	09180
D|1136176.5.peg.169	1	217512	218819	-	1308	1356	1484	1440	1288	1496	1534	533	521	706	575	645	594	913.77	1038.39	1016.45	949.807	989.153	1001.59	807.183	728.768	928.118	881.708	912.997	889.352	921.44	0.198661	0.0625959	3.17371	0.00150505	0.00247834	C4-dicarboxylate transporter DcuA	NA	K07791	dcuA; anaerobic C4-dicarboxylate transporter DcuA	304	02000	Transporters [BR:ko02000],	09183	09180
D|1136176.5.peg.1878	1	2162951	2163913	+	963	724.5	726	753	687	794.5	831.5	229	336.5	373	286	371.5	295	487.883	507.997	531.519	506.613	524.991	542.582	346.801	469.993	490.351	438.554	525.15	441.682	484.51	0.191528	0.0804198	2.3816	0.0172375	0.0248731	Peptide transport system permease protein SapB	NA	K19227	sapB; cationic peptide transport system permease protein	231	02010 01503 02000	ABC transporters [PATH:ko02010], Cationic antimicrobial peptide (CAMP) resistance [PATH:ko01503], Transporters [BR:ko02000],	09131 09175 09183	09130 09160 09180
D|1136176.5.peg.487	1	550547	552172	+	1626	328.5	350	282.5	317.5	321	334	136	135	149.5	132	126.5	130.5	221.03	244.902	199.055	233.764	212.245	218.078	205.96	188.836	195.878	202.409	178.353	194.639	207.929	0.1893	0.0778568	2.43139	0.0150412	0.0218532	Ferric iron ABC transporter%2C permease protein	NA	K02011	afuB, fbpB; iron(III) transport system permease protein	373	02010 02000	ABC transporters [PATH:ko02010], Transporters [BR:ko02000],	09131 09183	09130 09180
D|1136176.5.peg.2895	1	3332824	3335946	+	3123	42168.5	38222	37647	37311.5	40221	40397.5	18682	16922.5	16890.5	16369	14795	15360.5	28415.8	26744.7	26573.8	27514.2	26594.1	26376.3	28292.3	23670.3	22203.8	25100.3	20942.3	22997.4	25452.1	0.179889	0.0667311	2.69573	0.00702355	0.0106477	RND multidrug efflux transporter%3B Acriflavin resistance protein	NA	K18138	acrB, mexB, adeJ, smeE, mtrD, cmeB; multidrug efflux pump	1062	01501 01503 02000 01504	beta-Lactam resistance [PATH:ko01501], Cationic antimicrobial peptide (CAMP) resistance [PATH:ko01503], Transporters [BR:ko02000], Antimicrobial resistance genes [BR:ko01504],	09175 09183	09160 09180
D|1136176.5.peg.3900	2	1062994	1065432	-	2439	214.5	199	196	191	255	222	88	93.5	100	81	102	74.5	144.208	139.244	138.35	140.849	168.606	144.95	133.269	130.087	131.461	124.206	144.381	110.795	137.534	0.178067	0.0921978	1.93136	0.0534385	0.0712003	hypothetical protein	NA	K07347	fimD, fimC, mrkC, htrE, cssD; outer membrane usher protein	103	05133 02000 02044 02035	Pertussis [PATH:ko05133], Transporters [BR:ko02000], Secretion system [BR:ko02044], Bacterial motility proteins [BR:ko02035],	09171 09183	09160 09180
D|1136176.5.peg.329	1	367771	368334	-	564	2268	2189	2140.5	2028.5	2379	2345.5	910.5	964	1068.5	931.5	901.5	872	1528.34	1531.69	1510.56	1495.5	1572.99	1531.11	1378.12	1348.43	1404.01	1427.6	1275.37	1305.58	1442.44	0.172367	0.0360887	4.77619	1.79e-06	3.97e-06	Uncharacterized protein YrbK clustered with lipopolysaccharide transporters	NA	K11719	lptC; lipopolysaccharide export system protein LptC	52	02000	Transporters [BR:ko02000],	09183	09180
D|1136176.5.peg.1226	1	1432932	1433792	-	861	196	227	239	277	249	298	99	123	95	111	111	90	132.079	158.837	168.702	204.267	164.638	194.572	149.927	172.051	124.888	170.208	157.12	134.75	161.003	0.171456	0.120201	1.42641	0.153749	0.189461	D01205396: hypothetical protein	NA	K22110	kdgM, kdgN, nanC, ompL; oligogalacturonate-specific porin family protein	19	02000	Transporters [BR:ko02000],	09183	09180
D|1136176.5.peg.3533	2	654515	656380	-	1866	336	338	351	283	344	339	132	125	151	152	122	162	226.421	236.506	247.76	208.692	227.452	221.342	199.903	174.848	198.507	233.077	172.691	242.551	215.812	0.16681	0.0878033	1.89982	0.0574569	0.0761608	PTS system%2C fructose-specific IIA component (EC 2.7.1.69) / PTS system%2C fructose-specific IIB component (EC 2.7.1.69) / PTS system%2C fructose-specific IIC component (EC 2.7.1.69)	KEGG_ENZYME:2.7.1.69,KEGG_ENZYME:2.7.1.69,KEGG_ENZYME:2.7.1.69	K11203	fryC, frvB; fructose-like PTS system EIIC or EIIBC or EIIABC component	232	02000	Transporters [BR:ko02000],	09183	09180
D|1136176.5.peg.2721	1	3140097	3141245	-	1149	538	510	486	474	517	560	194	213	263	179	246	217	362.543	356.858	343.052	349.541	341.839	365.639	293.797	297.942	345.744	274.479	348.213	324.898	333.712	0.166437	0.0650552	2.5584	0.0105156	0.0155804	Polysaccharide export lipoprotein Wza	NA	K01991	wza, gfcE; polysaccharide biosynthesis/export protein	249	02020 02026 02000	Two-component system [PATH:ko02020], Biofilm formation - Escherichia coli [PATH:ko02026], Transporters [BR:ko02000],	09132 09145 09183	09130 09140 09180
D|1136176.5.peg.4416	2	1664642	1666018	+	1377	620.5	590	586.5	498	610	625	239	269	274.5	245.5	223	251.5	417.8	412.835	413.639	367.239	403.331	408.079	361.945	376.274	360.204	375.684	315.656	375.804	382.374	0.163432	0.0610775	2.67582	0.00745468	0.0112719	MotA/TolQ/ExbB proton channel family protein	NA	K03561	exbB; biopolymer transport protein ExbB	197	02000	Transporters [BR:ko02000],	09183	09180
D|1136176.5.peg.3448	2	559709	560905	+	1197	62	67	60	70	59	60	26	18	23	33	32	29	41.78	46.8813	42.3521	51.6199	39.0107	39.1756	39.3748	25.1782	30.2361	50.6023	45.296	43.4195	41.2439	0.162198	0.160546	1.01029	0.312357	0.359435	Membrane transport protein	NA	K07552	bcr, tcaB; MFS transporter, DHA1 family, multidrug resistance protein	157	02000	Transporters [BR:ko02000],	09183	09180
D|1136176.5.peg.3574	2	700591	701238	+	648	222	219	206	191	217	247	120	81	104	84	67	98	149.599	153.239	145.409	140.849	143.48	161.273	181.73	113.302	136.72	128.806	94.8385	146.728	141.331	0.159788	0.116169	1.37548	0.168984	0.206481	Glutathione S-transferase (EC 2.5.1.18)	KEGG_ENZYME:2.5.1.18	K00799	GST, gst; glutathione S-transferase [EC:2.5.1.18]	110	00480 00980 00982 00983 04212 05200 05204 05225 05418 01524 02000	Glutathione metabolism [PATH:ko00480], Metabolism of xenobiotics by cytochrome P450 [PATH:ko00980], Drug metabolism - cytochrome P450 [PATH:ko00982], Drug metabolism - other enzymes [PATH:ko00983], Longevity regulating pathway - worm [PATH:ko04212], Pathways in cancer [PATH:ko05200], Chemical carcinogenesis [PATH:ko05204], Hepatocellular carcinoma [PATH:ko05225], Fluid shear stress and atheroscle…	09106 09111 09149 09161 09162 09166 09176 09183	09100 09150 09160 09180
D|1136176.5.peg.1610	1	1879904	1880929	+	1026	307.5	298.5	336.5	315	309	333.5	114.5	101	197	125	151	127	206.878	208.517	237.172	232.29	204.31	217.425	172.643	141.278	258.979	191.676	213.74	190.148	206.255	0.158108	0.114166	1.38489	0.166085	0.203207	TRAP-type C4-dicarboxylate transport system%2C periplasmic component	NA	K21395	yiaO; TRAP-type transport system periplasmic protein	186	02000	Transporters [BR:ko02000],	09183	09180
D|1136176.5.peg.3983	2	1160205	1160753	-	549	152	161.5	147	139.5	185	143	59.5	56.5	96.5	66.5	69	52.5	102.428	112.655	103.763	102.502	122.322	93.3686	89.3505	78.3321	126.203	101.205	97.6695	77.8557	100.638	0.154373	0.119583	1.29092	0.19673	0.237077	Substrate-specific component MtsA of methionine-regulated ECF transporter	NA	K16924	mtsT; energy-coupling factor transport system substrate-specific component	147	02000	Transporters [BR:ko02000],	09183	09180
D|1136176.5.peg.152	1	194679	195875	+	1197	46	59	59	56	56	66	27	21	31	14	30	24	30.9981	41.2835	41.6462	41.2959	37.0271	43.0932	40.8892	29.3745	40.753	21.4677	42.465	35.9334	37.1856	0.151651	0.165181	0.918088	0.358573	0.406967	Probable 3-phenylpropionic acid transporter	NA	K05820	hcaT; MFS transporter, PPP family, 3-phenylpropionic acid transporter	174	02000	Transporters [BR:ko02000],	09183	09180
D|1136176.5.peg.2889	1	3322984	3324537	-	1554	26983	27706	27452	25288	29716	28820	12426	12748	13554	8797	13033	11310	18183.1	19386.5	19377.5	18648.1	19648.2	18817.4	18818.1	17831.7	17818.3	13489.4	18448.2	16933.6	18116.7	0.142372	0.0732503	1.94364	0.0519388	0.0693613	Dipeptide-binding ABC transporter%2C periplasmic substrate-binding component (TC 3.A.1.5.2)	NA	K02035	ABC.PE.S; peptide/nickel transport system substrate-binding protein	389	02024 02000	Quorum sensing [PATH:ko02024], Transporters [BR:ko02000],	09145 09183	09140 09180
D|1136176.5.peg.3981	2	1157668	1158507	-	840	385	355	357.5	382	377.5	372	161	154.5	189	154.5	156	150.5	259.44	248.401	251.995	281.697	249.272	242.889	243.821	215.413	248.462	236.144	220.818	224.584	243.578	0.14136	0.0704172	2.00747	0.0447002	0.0604246	Transmembrane component MtsC of energizing module of methionine-regulated ECF transporter	NA	K16785	ecfT; energy-coupling factor transport system permease protein	192	02010 02000	ABC transporters [PATH:ko02010], Transporters [BR:ko02000],	09131 09183	09130 09180
D|1136176.5.peg.469	1	526431	528104	+	1674	293	289	262	268	295	318	118	120	144	123	121	122	197.444	202.219	184.937	197.631	195.053	207.631	178.701	167.854	189.304	188.609	171.275	182.662	188.61	0.136585	0.0750532	1.81984	0.0687834	0.0901448	Sulfate permease	NA	K03321	TC.SULP; sulfate permease, SulP family	385	02000	Transporters [BR:ko02000],	09183	09180
D|1136176.5.peg.1694	1	1961420	1962316	-	897	489	481	451	455	504	482	176	180	251	221	213	204	329.523	336.566	318.347	335.529	333.244	314.711	266.537	251.782	329.968	338.882	301.501	305.434	313.502	0.133004	0.0709748	1.87396	0.060936	0.0803822	Permease of the drug/metabolite transporter (DMT) superfamily	NA	K15268	eamA; O-acetylserine/cysteine efflux transporter	150	02000	Transporters [BR:ko02000],	09183	09180
D|1136176.5.peg.2275	1	2593159	2593950	+	792	2943	2929	2706	2678	2779	2923	1250	1215	1227	1172	1299	1248	1983.2	2049.48	1910.08	1974.83	1837.47	1908.51	1893.02	1699.53	1613.03	1797.15	1838.73	1868.54	1864.46	0.123752	0.0477177	2.59341	0.00950284	0.0141567	Outer membrane protein OmpK	NA	K05517	tsx; nucleoside-specific channel-forming protein	211	02000	Transporters [BR:ko02000],	09183	09180
D|1136176.5.peg.4227	2	1445080	1445925	+	846	68	53	54	41	63	64	32.5	29.5	26.5	20.5	26.5	17	45.8233	37.0852	38.1169	30.2345	41.6555	41.7873	48.4613	40.5648	34.18	30.6681	36.803	25.4528	37.5694	0.122452	0.165444	0.740144	0.459213	0.508266	Hydroxymethylpyrimidine ABC transporter%2C transmembrane component	NA	K15599	thiX; putative hydroxymethylpyrimidine transport system permease protein	156	02010 02000	ABC transporters [PATH:ko02010], Transporters [BR:ko02000],	09131 09183	09130 09180
D|1136176.5.peg.4041	2	1233577	1235670	-	2094	660	593	600	583	619	627	296	286	269	278	251	232	444.755	414.934	423.521	429.92	409.282	409.385	448.267	400.053	353.631	426.286	355.29	347.356	405.223	0.121246	0.0679114	1.78536	0.0742029	0.0967284	Ferrichrome-iron receptor	NA	K02014	TC.FEV.OM; iron complex outermembrane recepter protein	243	02000	Transporters [BR:ko02000],	09183	09180
D|1136176.5.peg.1153	1	1309984	1311705	-	1722	744.5	695.5	658	677	743	772	291.5	371	335.5	315.5	291	277.5	501.36	486.306	464.461	499.238	491.27	504.06	440.695	518.95	440.396	483.022	411.91	414.731	471.367	0.121057	0.0608586	1.98916	0.0466839	0.06285	Transport ATP-binding protein CydC	NA	K16012	cydC; ATP-binding cassette, subfamily C, bacterial CydC	326	02010 02000	ABC transporters [PATH:ko02010], Transporters [BR:ko02000],	09131 09183	09130 09180
D|1136176.5.peg.1289	1	1500555	1501787	-	1233	391	396	387	362.5	417.5	395	135.5	183	228	127.5	203	159.5	263.484	277.089	273.171	266.949	275.72	257.906	204.446	255.978	299.732	194.742	287.346	238.059	257.885	0.120418	0.0944339	1.27516	0.202254	0.242851	ABC-type multidrug transport system%2C permease component	NA	K01992	ABC-2.P; ABC-2 type transport system permease protein	134	02000	Transporters [BR:ko02000],	09183	09180
D|1136176.5.peg.328	1	367296	367790	-	495	3233.5	3241.5	3099.5	2908.5	3490	3395.5	1349	1405	1645.5	1414.5	1367.5	1336	2178.63	2267.79	2187.49	2144.44	2307.58	2216.69	2042.95	1965.3	2162.54	2168.23	1934.99	2000.29	2131.41	0.116189	0.0390032	2.97895	0.00289241	0.00459343	LptA%2C protein essential for LPS transport across the periplasm	NA	K09774	lptA; lipopolysaccharide export system protein LptA	66	02000	Transporters [BR:ko02000],	09183	09180
D|1136176.5.peg.656	1	745346	746101	-	756	125	146	157	134	169	184	46	71	88	73	79	47	84.2339	102.159	110.821	98.8153	111.743	120.139	69.6631	99.3139	115.686	111.939	111.824	70.3696	100.559	0.113975	0.136742	0.833501	0.404562	0.45318	Outer membrane protein V	NA	K07274	mipA, ompV; MipA family protein	13	02000	Transporters [BR:ko02000],	09183	09180
D|1136176.5.peg.4226	2	1444323	1445087	+	765	23	19.5	19	13	22.5	24	7.5	7.5	11.5	6	13	9.5	15.499	13.2947	13.4115	9.58656	14.5464	15.6702	10.6009	9.79151	14.4608	9.20043	18.4015	13.475	13.1615	0.109575	0.260808	0.420138	0.674385	0.717181	Hydroxymethylpyrimidine ABC transporter%2C ATPase component	NA	K15600	thiZ; putative hydroxymethylpyrimidine transport system ATP-binding protein	130	02010 02000	ABC transporters [PATH:ko02010], Transporters [BR:ko02000],	09131 09183	09130 09180
D|1136176.5.peg.4033	2	1222391	1223632	+	1242	168	204	176.5	202	195.5	205	79.5	89.5	91.5	84.5	87.5	79	113.21	142.743	124.233	148.96	128.934	133.85	119.639	124.492	119.63	128.806	123.148	118.281	127.161	0.10849	0.095595	1.13489	0.256422	0.300432	Macrolide-specific efflux protein MacA	NA	K13888	macA; membrane fusion protein, macrolide-specific efflux system	160	02000	Transporters [BR:ko02000],	09183	09180
D|1136176.5.peg.4245	2	1463165	1464118	+	954	60.5	53.5	58.5	49.5	62.5	59.5	28	29.5	24	24	21	25	40.4323	37.0852	40.9404	36.1339	40.9943	38.5227	42.4036	40.5648	31.5507	36.8017	29.7255	37.4306	37.7155	0.105529	0.155663	0.677933	0.497814	0.54643	Catechol siderophore ABC transporter%2C permease component	NA	K02015	ABC.FEV.P; iron complex transport system permease protein	160	02000	Transporters [BR:ko02000],	09183	09180
D|1136176.5.peg.1860	1	2142547	2143197	+	651	147.5	143.5	150	172	167.5	181	45.5	56	100.5	71.5	76	79.5	99.0591	100.06	105.88	126.838	110.42	118.18	68.1487	78.3321	131.461	108.872	107.578	118.281	106.092	0.104906	0.135509	0.774165	0.438834	0.487453	ABC transporter%2C ATP-binding protein YnjD	NA	K05779	ABC.VB1X.A; putative thiamine transport system ATP-binding protein	112	02000	Transporters [BR:ko02000],	09183	09180
D|1136176.5.peg.1793	1	2074114	2075262	-	1149	249	198	179.5	207.5	206	211.5	108.5	65.5	98.5	98.5	93	91.5	167.794	138.545	126.35	152.647	136.207	137.768	163.557	90.9212	128.832	150.274	131.641	136.248	138.399	0.104115	0.118241	0.880528	0.378573	0.426435	Maltose/maltodextrin ABC transporter%2C substrate binding periplasmic protein MalE	NA	K15770	cycB, ganO; arabinogalactan oligomer / maltooligosaccharide transport system substrate-binding protein	10	02010 02000	ABC transporters [PATH:ko02010], Transporters [BR:ko02000],	09131 09183	09130 09180
D|1136176.5.peg.11	1	14467	15021	+	555	9	8	11	6	9	11	2	8	6	4	2	2	6.06484	5.59777	7.76455	4.42456	5.95078	7.1822	3.02883	11.1903	7.88769	6.13362	2.831	2.99445	5.92088	0.103016	0.3874	0.265916	0.790304	0.820531	Probable transmembrane protein	NA	K23541	TMEM165, GDT1; Ca2+/H+ antiporter, TMEM165/GDT1 family	93	04131 02000	Membrane trafficking [BR:ko04131], Transporters [BR:ko02000],	09182 09183	09180
D|1136176.5.peg.3332	2	426572	428335	-	1764	976.5	981.5	941	956	1033.5	1054.5	398.5	414	488.5	445	451	460.5	657.698	686.426	664.222	704.981	683.018	688.185	602.737	579.098	641.532	682.365	638.39	688.724	659.781	0.0924638	0.0501038	1.84545	0.0649728	0.0854401	ATP-binding protein of ABC transporter	NA	K18889	mdlA, smdA; ATP-binding cassette, subfamily B, multidrug efflux pump	265	02010 02000	ABC transporters [PATH:ko02010], Transporters [BR:ko02000],	09131 09183	09130 09180
D|1136176.5.peg.1547	1	1804965	1805924	-	960	48	38	43	42	46	42.5	29.5	24.5	19.5	13.5	14	17.5	32.3458	26.5894	30.3523	30.972	30.4151	27.4229	43.918	33.5709	24.9777	19.9343	19.817	25.4528	28.814	0.089775	0.184482	0.486632	0.626519	0.672907	Ferric hydroxamate ABC transporter (TC 3.A.1.14.3)%2C periplasmic substrate binding protein FhuD	NA	K23227	fhuD; ferric hydroxamate transport system substrate-binding protein	146	02010 02000	ABC transporters [PATH:ko02010], Transporters [BR:ko02000],	09131 09183	09130 09180
D|1136176.5.peg.332	1	369894	370859	-	966	1215	1152	1106	1042	1230	1223	502	499	562	519	512	525	818.754	806.078	780.69	768.399	813.274	798.53	760.236	697.995	738.813	795.837	724.736	786.043	774.115	0.0894373	0.0444834	2.01058	0.0443703	0.0600312	Inner membrane protein YrbG%2C predicted calcium/sodium:proton antiporter	NA	K07301	yrbG; cation:H+ antiporter	257	02000	Transporters [BR:ko02000],	09183	09180
D|1136176.5.peg.2295	1	2616252	2616893	+	642	249	240	222	242	231	257	87	103	119	105	103	130	167.794	167.933	156.703	178.457	152.737	167.802	131.754	144.075	156.439	161.007	145.796	194.639	160.428	0.0869196	0.0898574	0.967306	0.333391	0.38137	Multiple antibiotic resistance protein marC	NA	K05595	marC; multiple antibiotic resistance protein	107	02000	Transporters [BR:ko02000],	09183	09180
D|1136176.5.peg.2894	1	3331706	3332812	+	1107	19588.5	17395	17546	17031	18632	18863.5	9098	8437.5	8180.5	8521	7101.5	7506.5	13199.8	12171.6	12385.2	12559.1	12319.4	12316.2	13778.1	11801.6	10753.5	13066.1	10051.5	11238.2	12136.7	0.084558	0.0735646	1.14944	0.250376	0.294313	Probable Co/Zn/Cd efflux system membrane fusion protein	NA	K03585	acrA, mexA, adeI, smeD, mtrC, cmeA; membrane fusion protein, multidrug efflux system	251	01501 01503 03036 02000 01504	beta-Lactam resistance [PATH:ko01501], Cationic antimicrobial peptide (CAMP) resistance [PATH:ko01503], Chromosome and associated proteins [BR:ko03036], Transporters [BR:ko02000], Antimicrobial resistance genes [BR:ko01504],	09175 09182 09183	09160 09180
D|1136176.5.peg.3626	2	758220	759113	+	894	342	311	296	270	332	353	114	174	184	100	175	116	230.464	217.613	208.937	199.105	219.518	230.483	172.643	243.389	241.889	153.34	247.712	173.678	211.564	0.0796847	0.115932	0.68734	0.491868	0.540543	Permease of the drug/metabolite transporter (DMT) superfamily	NA	K15269	pecM; probable blue pigment (indigoidine) exporter	59	02000	Transporters [BR:ko02000],	09183	09180
D|1136176.5.peg.2479	1	2838793	2839662	+	870	89	94	85.5	84	93.5	98	47.5	34	42.5	35	48.5	39.5	59.9745	65.7737	59.9988	61.9439	61.4914	63.9868	71.1775	47.5588	55.2138	53.6692	67.944	58.3918	60.5937	0.079025	0.125737	0.628496	0.529679	0.577447	Vitamin B12 ABC transporter%2C B12-binding component BtuF	NA	K06858	btuF; vitamin B12 transport system substrate-binding protein	128	02010 02000	ABC transporters [PATH:ko02010], Transporters [BR:ko02000],	09131 09183	09130 09180
D|1136176.5.peg.1502	1	1753005	1753673	-	669	70	58	57.5	66	51	62.5	27.5	32	29	20	31.5	26	47.171	40.5838	40.2345	48.6702	33.7211	40.4815	40.8892	44.7612	38.1238	30.6681	43.8805	38.9279	40.6761	0.0748521	0.154978	0.482986	0.629105	0.675372	Arginine ABC transporter%2C permease protein ArtM	NA	K09998	artM; arginine transport system permease protein	190	02010 02000	ABC transporters [PATH:ko02010], Transporters [BR:ko02000],	09131 09183	09130 09180
D|1136176.5.peg.3358	2	458025	458684	-	660	1353.5	1244.5	1255.5	1238.5	1302.5	1284.5	476.5	563.5	621	523.5	735	570	911.748	870.452	885.865	912.935	860.88	838.358	720.862	787.517	816.375	801.971	1040.39	853.419	858.398	0.0721983	0.0757924	0.952579	0.340803	0.388974	Trk system potassium uptake protein TrkA	NA	K03499	trkA, ktrA; trk system potassium uptake protein	83	02000	Transporters [BR:ko02000],	09183	09180
D|1136176.5.peg.3081	2	165424	166503	-	1080	773.5	699.5	720	790	798	789.5	312	349.5	433.5	258	359.5	386	520.903	489.105	508.225	582.568	527.636	515.159	472.498	488.177	569.228	395.618	508.164	577.929	512.934	0.0602987	0.0847782	0.711253	0.476928	0.525991	BatA (Bacteroides aerotolerance operon)	NA	K07114	yfbK; Ca-activated chloride channel homolog	129	02000	Transporters [BR:ko02000],	09183	09180
D|1136176.5.peg.3544	2	670340	671965	-	1626	1984	1984	2077	1905	2170	2208	883	1001	1072	874	939	894	1336.96	1388.25	1466.09	1404.8	1434.8	1441.66	1337.23	1400.19	1409.27	1340.2	1329.15	1338.52	1385.59	0.0545267	0.03722	1.46499	0.142925	0.17774	Oligopeptide ABC transporter%2C periplasmic oligopeptide-binding protein OppA (TC 3.A.1.5.1)	NA	K15580	oppA, mppA; oligopeptide transport system substrate-binding protein	359	02010 02024 01501 02000	ABC transporters [PATH:ko02010], Quorum sensing [PATH:ko02024], beta-Lactam resistance [PATH:ko01501], Transporters [BR:ko02000],	09131 09145 09175 09183	09130 09140 09160 09180
D|1136176.5.peg.1859	1	2140881	2142581	+	1701	1442	1404.5	1367.5	1382.5	1450.5	1498.5	563.5	691	750.5	644.5	649.5	634.5	971.722	982.408	964.922	1019.12	958.737	978.085	852.616	966.562	985.961	987.512	918.659	949.241	961.296	0.0526525	0.042928	1.22653	0.219999	0.262057	ABC transporter%2C permease protein YnjC	NA	K05778	ABC.VB1X.P; putative thiamine transport system permease protein	216	02000	Transporters [BR:ko02000],	09183	09180
D|1136176.5.peg.3804	2	954272	955663	-	1392	5306	4886	5288	5142	5638	5567	2145	2621	2639	2266	2670	2396	3575.56	3418.84	3732.63	3791.85	3727.84	3634.84	3248.42	3666.22	3469.27	3474.69	3779.38	3587.35	3592.24	0.0437041	0.0429974	1.01644	0.309422	0.356235	Type I secretion system%2C membrane fusion protein LapC	NA	K12542	lapC; membrane fusion protein, adhesin transport system	272	02000 02044	Transporters [BR:ko02000], Secretion system [BR:ko02044],	09183	09180
D|1136176.5.peg.4224	2	1442216	1443133	+	918	34	30	38	29	33	46	24	8	14	17	19	15	22.9116	20.9916	26.823	21.3854	21.8195	30.0346	36.346	11.1903	18.4046	26.0679	26.8945	22.4584	23.7773	0.0406013	0.210743	0.192658	0.847227	0.869325	Permease of the drug/metabolite transporter (DMT) superfamily	NA	K03298	TC.DME; drug/metabolite transporter, DME family	133	02000	Transporters [BR:ko02000],	09183	09180
D|1136176.5.peg.1506	1	1756502	1758337	+	1836	188	157	160	170	163	184	72	62	99	73	80	88	126.688	109.856	112.939	125.363	107.775	120.139	109.038	86.7248	130.147	111.939	113.24	131.756	115.467	0.0405632	0.102086	0.397343	0.691114	0.732288	ABC transporter ATP-binding protein	NA	K06147	ABCB-BAC; ATP-binding cassette, subfamily B, bacterial	369	02000	Transporters [BR:ko02000],	09183	09180
D|1136176.5.peg.3080	2	163707	165431	-	1725	949.5	888	886	915	962	972	365	435	524	341	475.5	453.5	639.504	621.352	625.399	674.746	636.073	634.645	552.762	608.473	688.858	522.891	672.362	678.243	629.609	0.0394783	0.069225	0.57029	0.568481	0.616419	TPR domain protein in aerotolerance operon	NA	K07114	yfbK; Ca-activated chloride channel homolog	135	02000	Transporters [BR:ko02000],	09183	09180
D|1136176.5.peg.1618	1	1887872	1889365	-	1494	507	464.5	499	466	508.5	549.5	248	243	256.5	198.5	236	208	341.653	324.67	352.228	343.641	335.889	358.457	375.575	339.905	336.541	303.614	334.058	311.423	338.138	0.0390735	0.0618667	0.631577	0.527664	0.57552	Ribose/xylose/arabinose/galactoside ABC-type transport systems%2C ATP-binding protein (EC 3.6.3.17)	KEGG_ENZYME:3.6.3.17	K02056	ABC.SS.A; simple sugar transport system ATP-binding protein [EC:7.5.2.-]	362	02000	Transporters [BR:ko02000],	09183	09180
D|1136176.5.peg.885	1	997206	998051	-	846	284	288	341	299	332	327	130	180	167	145	130	118	191.379	201.52	240.701	220.491	219.518	213.507	196.874	251.782	219.541	222.344	184.015	176.673	211.529	0.038802	0.0922517	0.42061	0.67404	0.716978	Potassium voltage-gated channel subfamily KQT%3B possible potassium channel%2C VIC family	NA	K10716	kch, trkA, mthK, pch; voltage-gated potassium channel	161	02000	Transporters [BR:ko02000],	09183	09180
D|1136176.5.peg.4228	2	1446046	1447002	+	957	135.5	121.5	106	106	118.5	115.5	47.5	58	59.5	61	50.5	51	90.9726	84.6662	74.822	78.1673	78.0214	75.0866	71.1775	81.1297	77.5622	93.5377	70.775	76.3585	79.3564	0.0355778	0.112837	0.315304	0.752531	0.787299	Hydroxymethylpyrimidine ABC transporter%2C substrate-binding component	NA	K15598	thiY; putative hydroxymethylpyrimidine transport system substrate-binding protein	216	02010 02000	ABC transporters [PATH:ko02010], Transporters [BR:ko02000],	09131 09183	09130 09180
D|1136176.5.peg.3350	2	448386	449393	-	1008	40	40	46	30	48	41	20	20	18	20	17	19	26.9549	27.9888	32.4699	22.1228	31.7375	26.77	30.2883	27.9757	23.6631	30.6681	24.0635	28.4473	27.7625	0.0334466	0.181659	0.184118	0.853921	0.875034	Ferric iron ABC transporter%2C iron-binding protein	NA	K02012	afuA, fbpA; iron(III) transport system substrate-binding protein	198	02010 02000	ABC transporters [PATH:ko02010], Transporters [BR:ko02000],	09131 09183	09130 09180
D|1136176.5.peg.505	1	577125	578249	+	1125	430.5	389	406.5	386	425.5	434.5	190	202	190.5	165.5	231	178	289.765	272.191	286.582	284.647	281.009	283.37	287.739	282.555	249.777	253.012	326.98	266.506	280.344	0.0266708	0.0685619	0.389003	0.697274	0.737804	Membrane-fusion protein	NA	K18990	vexE; membrane fusion protein, multidrug efflux system	144	02000	Transporters [BR:ko02000],	09183	09180
D|1136176.5.peg.3698	2	845584	846810	-	1227	860	827	756	699	830	838	416	384	345	412	319	369	579.529	578.669	533.636	515.462	548.795	547.153	629.997	537.134	453.542	631.763	451.544	552.476	546.642	0.0227371	0.0878942	0.258687	0.795876	0.825393	Sodium/glutamate symport protein	NA	K03312	gltS; glutamate:Na+ symporter, ESS family	401	02000	Transporters [BR:ko02000],	09183	09180
D|1136176.5.peg.550	1	632720	635110	-	2391	5067.5	4996	5053	4713.5	5340	5307	2099	2563.5	2523	2280.5	2510	2334.5	3414.51	3495.8	3566.75	3475.5	3530.8	3465.08	3178.76	3585.09	3316.77	3496.16	3552.9	3494.52	3464.39	0.0224392	0.0339991	0.659992	0.509259	0.557937	P pilus assembly protein%2C porin PapC	NA	K07347	fimD, fimC, mrkC, htrE, cssD; outer membrane usher protein	109	05133 02000 02044 02035	Pertussis [PATH:ko05133], Transporters [BR:ko02000], Secretion system [BR:ko02044], Bacterial motility proteins [BR:ko02035],	09171 09183	09160 09180
D|1136176.5.peg.3164	2	256469	257938	+	1470	303	294	289	276	283	268	154	147	140	133	115	116	204.183	205.718	203.996	203.53	187.119	174.984	233.22	205.622	184.046	203.943	162.782	173.678	195.235	0.021037	0.088217	0.238469	0.811518	0.839177	Nitrate/nitrite transporter	NA	K02575	NRT, narK, nrtP, nasA; MFS transporter, NNP family, nitrate/nitrite transporter	395	00910 02000	Nitrogen metabolism [PATH:ko00910], Transporters [BR:ko02000],	09102 09183	09100 09180
D|1136176.5.peg.3359	2	458869	460002	+	1134	1025	947	965	947	1062	1070	445	455	553	455	459	460	690.718	662.635	681.163	698.344	702.193	698.632	673.915	636.448	726.982	697.699	649.714	688.724	683.931	0.0210262	0.0455462	0.461646	0.644335	0.688695	Small-conductance mechanosensitive channel	NA	K16052	ynaI, mscMJ; MscS family membrane protein	173	02000	Transporters [BR:ko02000],	09183	09180
D|1136176.5.peg.2508	1	2874477	2875112	-	636	4917	5046	4668	4301	4832	4878.5	2229	2272	2461	2281	2056.5	2177.5	3313.43	3530.79	3294.99	3171.68	3194.91	3184.98	3375.63	3178.04	3235.27	3497.7	2910.27	3259.46	3262.26	0.017562	0.0481524	0.364718	0.715322	0.754836	Stringent starvation protein A	NA	K03599	sspA, mglA; stringent starvation protein A	172	03021 02000	Transcription machinery [BR:ko03021], Transporters [BR:ko02000],	09182 09183	09180
D|1136176.5.peg.32	1	42784	43983	+	1200	170	178	212	180	200	212	103	93	94	68	91	95	114.558	124.55	149.644	132.737	132.24	138.421	155.985	130.087	123.574	104.272	128.81	142.236	131.426	0.013716	0.100977	0.135832	0.891954	0.90899	Multidrug resistance transporter%2C Bcr/CflA family	NA	K07552	bcr, tcaB; MFS transporter, DHA1 family, multidrug resistance protein	193	02000	Transporters [BR:ko02000],	09183	09180
D|1136176.5.peg.1481	1	1738970	1739302	-	333	50	53	46	43	49	43	18	27	31	12	21	26	33.6936	37.0852	32.4699	31.7094	32.3987	28.0759	27.2595	37.7673	40.753	18.4009	29.7255	38.9279	32.3556	0.00746442	0.17275	0.0432094	0.965535	0.972659	Protein of unknown function UPF0060	NA	K09771	TC.SMR3; small multidrug resistance family-3 protein	82	02000	Transporters [BR:ko02000],	09183	09180
D|1136176.5.peg.2873	1	3305059	3305382	-	324	107522	92655	96096.5	102397	104042	103578	57040	49021	45397	59186.5	37796.5	37789.5	72456	64832.6	67831.1	75510.4	68791.7	67628.9	86382.2	68570	59679.5	90756.1	53500.2	56578.7	69376.4	0.00549799	0.128095	0.0429212	0.965764	0.972679	Universal stress protein B	NA	K06144	uspB; universal stress protein B	77	02000	Transporters [BR:ko02000],	09183	09180
D|1136176.5.peg.1288	1	1499392	1500558	-	1167	213.5	220.5	234	215.5	209.5	227.5	69	126	115	92	123.5	104	143.535	153.939	165.173	158.547	138.19	148.214	104.495	176.247	151.181	141.073	174.106	155.711	150.868	0.00335497	0.104058	0.0322414	0.97428	0.979131	ABC-type multidrug transport system%2C permease component	NA	K01992	ABC-2.P; ABC-2 type transport system permease protein	169	02000	Transporters [BR:ko02000],	09183	09180
D|1136176.5.peg.2795	1	3214759	3216129	-	1371	115	114	102	92	130	120	37	69	51	48	63	52	77.4952	79.7682	71.9986	67.8433	85.9558	78.3512	56.0334	96.5163	67.0453	73.6034	89.1765	77.8557	76.8036	0.0032382	0.122646	0.0264027	0.978936	0.982843	Xanthine/uracil/thiamine/ascorbate permease family protein	NA	K06901	pbuG, azgA, ghxP, ghxQ, adeQ; adenine/guanine/hypoxanthine permease	254	02000	Transporters [BR:ko02000],	09183	09180
D|1136176.5.peg.1045	1	1189839	1190381	+	543	2195	2133	2067	1991	2224	2284	966	1043	1172	866	1070	1026	1479.15	1492.5	1459.03	1468.22	1470.5	1491.29	1462.93	1458.94	1540.73	1327.93	1514.58	1536.15	1475.16	0.00231016	0.0384443	0.060091	0.952083	0.961822	18K peptidoglycan-associated outer membrane lipoprotein%3B Peptidoglycan-associated lipoprotein precursor%3B Outer membrane protein P6%3B OmpA/MotB precursor	NA	K03640	pal; peptidoglycan-associated lipoprotein	101	02000	Transporters [BR:ko02000],	09183	09180
D|1136176.5.peg.3062	2	138758	140149	+	1392	2247.5	2138.5	2237	2281.5	2353.5	2541	721.5	1212	1403.5	857.5	1275	1184	1514.19	1496	1579.03	1682.07	1555.8	1659.09	1091.89	1695.33	1844.4	1314.13	1804.76	1772.72	1584.12	-0.00608159	0.117661	-0.0516872	0.958778	0.967322	Type I secretion system%2C outer membrane component LapE	NA	K12340	tolC; outer membrane protein	58	03070 02020 04626 05133 01501 01503 02000 02044 01504	Bacterial secretion system [PATH:ko03070], Two-component system [PATH:ko02020], Plant-pathogen interaction [PATH:ko04626], Pertussis [PATH:ko05133], beta-Lactam resistance [PATH:ko01501], Cationic antimicrobial peptide (CAMP) resistance [PATH:ko01503], Transporters [BR:ko02000], Secretion system [BR:ko02044], Antimicrobial resistance genes [BR:ko01504],	09131 09132 09159 09171 09175 09183	09130 09150 09160 09180
D|1136176.5.peg.3063	2	140139	141725	+	1587	2080.5	2001	2095.5	2052.5	2186.5	2367	763.5	1033.5	1293	783	1191	1135.5	1401.65	1400.14	1478.79	1513.2	1445.38	1545.48	1155.5	1444.95	1699.8	1200.66	1685.86	1699.35	1472.56	-0.0170678	0.101868	-0.167548	0.866939	0.886221	ABC transporter protein	NA	K12541	lapB; ATP-binding cassette, subfamily C, bacterial LapB	24	02010 02000 02044	ABC transporters [PATH:ko02010], Transporters [BR:ko02000], Secretion system [BR:ko02044],	09131 09183	09130 09180
D|1136176.5.peg.308	1	346051	347763	+	1713	1440	1376.5	1280.5	1207	1331.5	1434	576.5	730	717.5	557.5	656	663.5	970.375	962.816	903.511	890.075	880.055	936.297	872.303	1021.11	942.578	854.106	928.568	992.661	929.538	-0.018339	0.053113	-0.345282	0.729882	0.766541	Uncharacterized protein YtfM precursor	NA	K07278	tamA; translocation and assembly module TamA	280	02000	Transporters [BR:ko02000],	09183	09180
D|1136176.5.peg.74	1	101953	102570	+	618	441	459	442	373	472	458	208	204	255	210	212	191	297.177	321.172	311.994	275.06	312.086	299.041	314.998	285.353	335.227	322.015	300.086	285.97	305.015	-0.0215202	0.0662366	-0.3249	0.745257	0.780217	Homoserine/homoserine lactone efflux protein	NA	K05834	rhtB; homoserine/homoserine lactone efflux protein	115	02000	Transporters [BR:ko02000],	09183	09180
D|1136176.5.peg.1447	1	1698748	1700118	+	1371	849	841	757	804	785	884	403	382	458	379	395	370	572.117	588.465	534.342	592.892	519.041	577.187	610.309	534.337	602.093	581.16	559.122	553.973	568.753	-0.0243552	0.0559212	-0.435527	0.66318	0.706722	Multidrug and toxin extrusion (MATE) family efflux pump YdhE/NorM	NA	K03327	TC.MATE, SLC47A, norM, mdtK, dinF; multidrug resistance protein, MATE family	385	02000	Transporters [BR:ko02000],	09183	09180
D|1136176.5.peg.855	1	958684	959373	-	690	11034	10605	10645	9801	10980	11586	4571	4935	6165	5162	5215	5470	7435.5	7420.54	7513.97	7227.53	7259.96	7564.81	6922.39	6903.02	8104.6	7915.43	7381.83	8189.82	7486.62	-0.0319585	0.0504041	-0.634047	0.52605	0.574031	Aquaporin Z	NA	K06188	aqpZ; aquaporin Z	255	02000	Transporters [BR:ko02000],	09183	09180
D|1136176.5.peg.4379	2	1616755	1618689	+	1935	2489	2254	2474	2273	2591	2504	1251	1109	1246	1252	1146	1094	1677.27	1577.17	1746.32	1676.17	1713.16	1634.93	1894.53	1551.26	1638.01	1919.82	1622.16	1637.96	1690.73	-0.0332373	0.0594662	-0.558927	0.576212	0.6232	PTS system%2C 2-O-alpha-mannosyl-D-glycerate-specific IIA component / PTS system%2C 2-O-alpha-mannosyl-D-glycerate-specific IIB component / PTS system%2C 2-O-alpha-mannosyl-D-glycerate-specific IIC component	NA	K11200	mngA, hrsA; 2-O-A-mannosyl-D-glycerate PTS system EIIABC component [EC:2.7.1.195]	453	02060 02000	Phosphotransferase system (PTS) [PATH:ko02060], Transporters [BR:ko02000],	09131 09183	09130 09180
D|1136176.5.peg.109	1	131770	133605	+	1836	1030	993	1010	868	1090	1131	495	522	531	500	465	477	694.087	694.823	712.927	640.087	720.706	738.46	749.636	730.167	698.06	766.702	658.207	714.177	709.837	-0.0375578	0.0525302	-0.714976	0.474624	0.523824	Outer membrane vitamin B12 receptor BtuB	NA	K16092	btuB; vitamin B12 transporter	217	02000	Transporters [BR:ko02000],	09183	09180
D|1136176.5.peg.2429	1	2776655	2778232	-	1578	165	206	188	199	221	214	99	98	131	85	91	82	111.189	144.142	132.703	146.748	146.125	139.726	149.927	137.081	172.214	130.339	128.81	122.772	138.482	-0.0394821	0.103466	-0.381596	0.702761	0.743102	Proposed peptidoglycan lipid II flippase MurJ	NA	K03980	murJ, mviN; putative peptidoglycan lipid II flippase	378	01011 02000	Peptidoglycan biosynthesis and degradation proteins [BR:ko01011], Transporters [BR:ko02000],	09181 09183	09180
D|1136176.5.peg.327	1	366568	367293	-	726	1789.5	1808	1721	1608	1874	1817	803.5	906.5	1012	783	908.5	821.5	1205.56	1265.09	1214.8	1185.78	1239.09	1186.37	1216.08	1267.3	1330.39	1200.66	1285.27	1229.22	1235.47	-0.0464673	0.0382157	-1.21592	0.224015	0.266294	Lipopolysaccharide ABC transporter%2C ATP-binding protein LptB	NA	K06861	lptB; lipopolysaccharide export system ATP-binding protein [EC:3.6.3.-]	199	02010 02000	ABC transporters [PATH:ko02010], Transporters [BR:ko02000],	09131 09183	09130 09180
D|1136176.5.peg.2954	1	3397064	3397735	-	672	118	122.5	131.5	104.5	138.5	138.5	53.5	68.5	84.5	52.5	47	67.5	79.5168	85.3659	92.4687	76.6925	91.2454	90.1039	80.264	95.1175	110.428	79.737	66.5285	100.314	87.3152	-0.0500119	0.116965	-0.42758	0.668957	0.712388	Amino acid ABC transporter%2C permease protein	NA	K16962	yxeN; putative S-methylcysteine transport system permease protein	231	02010 02000	ABC transporters [PATH:ko02010], Transporters [BR:ko02000],	09131 09183	09130 09180
D|1136176.5.peg.23	1	32895	33278	+	384	1417	1400	1335	1193	1370	1428	684	611	748	643	679	651	954.876	979.609	942.334	879.751	905.842	932.38	1035.86	854.659	983.332	985.979	961.124	974.694	949.203	-0.0501194	0.0500222	-1.00194	0.316371	0.363424	CrcB protein	NA	K06199	crcB, FEX; fluoride exporter	65	02000	Transporters [BR:ko02000],	09183	09180
D|1136176.5.peg.177	1	225625	226533	+	909	1320	1249	1209	1161	1296	1295	584	649	697	662	543	580	889.51	873.951	853.395	856.153	856.913	845.54	884.418	907.813	916.286	1015.11	768.616	868.391	878.008	-0.0501981	0.0562635	-0.892198	0.372287	0.420571	Cobalt-zinc-cadmium resistance protein	NA	K13283	fieF; ferrous-iron efflux pump FieF	190	02000	Transporters [BR:ko02000],	09183	09180
D|1136176.5.peg.3982	2	1158504	1160198	-	1695	853	766.5	765.5	720.5	810.5	807	344.5	397	489.5	343	384	378	574.812	535.986	539.989	530.948	535.571	526.912	520.959	555.319	642.846	525.958	543.552	565.951	549.9	-0.0504695	0.0568892	-0.887156	0.374995	0.422917	Duplicated ATPase component MtsB of energizing module of methionine-regulated ECF transporter	NA	K01552	ecfA; energy-coupling factor transport system ATP-binding protein [EC:7.-.-.-]	352	02000	Transporters [BR:ko02000],	09183	09180
D|1136176.5.peg.355	1	389666	390766	+	1101	1040	1011.5	1003	964.5	1059	1109.5	544.5	546.5	510.5	456.5	493	505.5	700.826	707.418	707.986	710.88	700.209	724.096	823.842	763.738	670.453	699.232	697.841	756.099	721.885	-0.0518837	0.0508245	-1.02084	0.30733	0.354089	D000988: Predicted permease	NA	K07091	lptF; lipopolysaccharide export system permease protein	191	02010 02000	ABC transporters [PATH:ko02010], Transporters [BR:ko02000],	09131 09183	09130 09180
D|1136176.5.peg.3801	2	949495	951609	-	2115	3567.5	3449.5	3512	3375	3686	3840.5	1702.5	1809	2031.5	1480.5	1854.5	1755	2403.7	2413.34	2479.01	2488.82	2437.18	2507.24	2577.53	2530.41	2669.98	2269.44	2624.34	2627.63	2502.38	-0.0553293	0.0403994	-1.36956	0.170825	0.208403	Type I secretion system ATPase%2C LssB family LapB	NA	K12541	lapB; ATP-binding cassette, subfamily C, bacterial LapB	481	02010 02000 02044	ABC transporters [PATH:ko02010], Transporters [BR:ko02000], Secretion system [BR:ko02044],	09131 09183	09130 09180
D|1136176.5.peg.3526	2	647000	648163	+	1164	196	185	186	184	215	193	112	105	107	93	82	79	132.079	129.448	131.291	135.687	142.158	126.015	169.614	146.873	140.664	142.607	116.071	118.281	135.899	-0.0651874	0.0927705	-0.702675	0.482259	0.530988	Tyrosine-specific transport protein	NA	K03834	tyrP; tyrosine-specific transport protein	80	02000	Transporters [BR:ko02000],	09183	09180
D|1136176.5.peg.1209	1	1408344	1409174	-	831	313.5	263.5	241.5	247	303.5	274.5	101.5	154.5	145	121	166	135	210.922	184.027	170.114	182.145	200.343	178.902	152.956	215.413	190.619	185.542	234.973	202.125	192.34	-0.070392	0.0955973	-0.736338	0.461525	0.510581	Phosphonate ABC transporter permease protein phnE1 (TC 3.A.1.9.1)	NA	K02042	phnE; phosphonate transport system permease protein	164	02010 02000	ABC transporters [PATH:ko02010], Transporters [BR:ko02000],	09131 09183	09130 09180
D|1136176.5.peg.4171	2	1385792	1386607	-	816	82	75	76	77	86	74	31	34	43	61	29	37	55.2574	52.479	53.646	56.7819	56.863	48.3166	46.9469	47.5588	56.5284	93.5377	41.0495	55.3973	55.3635	-0.0714334	0.156929	-0.455194	0.648969	0.692692	Phosphate ABC transporter%2C periplasmic phosphate-binding protein PstS (TC 3.A.1.7.1)	NA	K02040	pstS; phosphate transport system substrate-binding protein	113	02010 02020 05152 02000	ABC transporters [PATH:ko02010], Two-component system [PATH:ko02020], Tuberculosis [PATH:ko05152], Transporters [BR:ko02000],	09131 09132 09171 09183	09130 09160 09180
D|1136176.5.peg.962	1	1086508	1087938	+	1431	14820	14798	14836	13354	15581	15541	6712	6972	8648	6811	7768	7723	9986.77	10354.5	10472.3	9847.61	10302.1	10147.1	10164.8	9752.35	11368.8	10444	10995.6	11563.1	10449.9	-0.0731845	0.0457701	-1.59896	0.10983	0.139208	PTS system%2C glucose-specific IIB component (EC 2.7.1.69) / PTS system%2C glucose-specific IIC component	KEGG_ENZYME:2.7.1.69	K02779	ptsG; glucose PTS system EIICB or EIICBA component [EC:2.7.1.199]	344	00010 00520 02060 05111 02000	Glycolysis / Gluconeogenesis [PATH:ko00010], Amino sugar and nucleotide sugar metabolism [PATH:ko00520], Phosphotransferase system (PTS) [PATH:ko02060], Biofilm formation - Vibrio cholerae [PATH:ko05111], Transporters [BR:ko02000],	09101 09131 09145 09183	09100 09130 09140 09180
D|1136176.5.peg.3048	2	106929	107993	+	1065	428	441.5	432	356.5	444.5	465	254	218	213	218.5	195.5	189.5	288.417	308.577	304.935	262.524	293.572	303.611	384.661	304.936	280.013	334.282	276.022	282.976	302.044	-0.077758	0.0842619	-0.922813	0.356105	0.404462	Multidrug resistance protein A	NA	K03543	emrA; membrane fusion protein, multidrug efflux system	142	02000	Transporters [BR:ko02000],	09183	09180
D|1136176.5.peg.1720	1	1985383	1986498	+	1116	73	66	65	61	65	70	33	31	28	38	30	41	49.1926	46.1816	45.8814	44.9831	42.9779	45.7049	49.9757	43.3624	36.8092	58.2694	42.465	61.3862	47.2658	-0.0780729	0.142139	-0.549272	0.582819	0.629613	putative membrane protein	NA	K08970	rcnA; nickel/cobalt transporter (NicO) family protein	88	02000	Transporters [BR:ko02000],	09183	09180
D|1136176.5.peg.922	1	1041131	1042051	+	921	222	225.5	211	174	237	246.5	84.5	108.5	137	73	114.5	147	149.599	157.437	148.938	128.312	156.704	160.62	127.211	151.069	180.102	111.939	161.367	220.092	154.449	-0.0793622	0.132336	-0.599702	0.548705	0.596927	Oligopeptide transport system permease protein OppB (TC 3.A.1.5.1)	NA	K15581	oppB; oligopeptide transport system permease protein	244	02010 02024 01501 02000	ABC transporters [PATH:ko02010], Quorum sensing [PATH:ko02024], beta-Lactam resistance [PATH:ko01501], Transporters [BR:ko02000],	09131 09145 09175 09183	09130 09140 09160 09180
D|1136176.5.peg.3008	2	62482	63705	+	1224	272	254	234	260	321	295	125	134	165	147	119	135	183.293	177.729	165.173	191.731	212.245	192.613	189.302	187.438	216.911	225.41	168.444	202.125	192.701	-0.0822821	0.0883707	-0.931102	0.351801	0.399966	Tyrosine-specific transport protein	NA	K03834	tyrP; tyrosine-specific transport protein	202	02000	Transporters [BR:ko02000],	09183	09180
D|1136176.5.peg.3998	2	1178968	1181109	+	2142	58	61.5	59	55	61	54	36	33	26	31	26.5	24	39.0845	42.683	41.6462	40.5585	40.3331	35.2581	54.5189	46.16	34.18	47.5355	36.803	35.9334	41.2245	-0.0857731	0.150824	-0.568696	0.569562	0.617303	TonB-dependent heme receptor HutR	NA	K16087	TC.FEV.OM3, tbpA, hemR, lbpA, hpuB, bhuR, hugA, hmbR; hemoglobin/transferrin/lactoferrin receptor protein	80	02000	Transporters [BR:ko02000],	09183	09180
D|1136176.5.peg.1043	1	1187294	1188361	+	1068	614	595	537.5	576	667.5	614.5	304.5	319	313	235.5	357.5	300	413.757	416.334	379.051	424.758	441.019	400.897	460.382	446.213	411.474	360.35	505.333	449.168	425.728	-0.0891841	0.0737971	-1.2085	0.226853	0.269185	TolA protein	NA	K03646	tolA; colicin import membrane protein	111	02000	Transporters [BR:ko02000],	09183	09180
D|1136176.5.peg.302	1	340824	342083	-	1260	610	666.5	658.5	567.5	692	689	293.5	362	405	250	337.5	335	411.062	466.014	464.461	418.121	457.549	449.867	443.724	506.361	532.419	383.351	477.023	501.571	459.294	-0.0949085	0.075472	-1.25753	0.208561	0.249714	ABC-type antimicrobial peptide transport system%2C permease component	NA	K02004	ABC.CD.P; putative ABC transport system permease protein	296	02000	Transporters [BR:ko02000],	09183	09180
D|1136176.5.peg.2018	1	2306525	2307901	-	1377	168	140	168	178	175	209	108	74	97	95	82	73	113.21	97.9609	118.586	131.262	115.71	136.462	163.557	103.51	127.518	145.673	116.071	109.297	123.235	-0.0994044	0.120227	-0.826805	0.408348	0.456979	Xanthine permease	NA	K16345	xanP; xanthine permease XanP	342	02000	Transporters [BR:ko02000],	09183	09180
D|1136176.5.peg.1648	1	1914021	1915220	+	1200	184	173	177	174	208	199	87	136	92	72	107	77	123.992	121.052	124.939	128.312	137.529	129.932	131.754	190.235	120.945	110.405	151.458	115.286	132.153	-0.101181	0.11558	-0.875419	0.381346	0.429245	possible efflux permease	NA	K08224	ynfM; MFS transporter, YNFM family, putative membrane transport protein	155	02000	Transporters [BR:ko02000],	09183	09180
D|1136176.5.peg.3577	2	703905	705356	-	1452	5218	4916	5056	4724	5291	5491	2469	2638	2793	2520	2716	2565	3516.26	3439.83	3568.87	3483.61	3498.4	3585.22	3739.09	3690	3671.72	3864.18	3844.5	3840.38	3645.17	-0.102297	0.0250794	-4.07893	4.52e-05	8.83e-05	PTS system%2C sucrose-specific IIB component (EC 2.7.1.69) / PTS system%2C sucrose-specific IIC component (EC 2.7.1.69)	KEGG_ENZYME:2.7.1.69,KEGG_ENZYME:2.7.1.69	K02810	scrA, sacP, sacX, ptsS; sucrose PTS system EIIBCA or EIIBC component [EC:2.7.1.211]	330	00500 02060 02000	Starch and sucrose metabolism [PATH:ko00500], Phosphotransferase system (PTS) [PATH:ko02060], Transporters [BR:ko02000],	09101 09131 09183	09100 09130 09180
D|1136176.5.peg.4459	2	1703690	1704448	+	759	2868	2799	2777	2722.5	2951	2909	1514.5	1547.5	1447	1590.5	1257	1361	1932.66	1958.52	1960.2	2007.28	1951.2	1899.36	2292.82	2163.92	1902.25	2438.11	1779.28	2037.72	2026.94	-0.106905	0.0705934	-1.51438	0.12993	0.163098	Molybdenum ABC transporter%2C periplasmic molybdenum-binding protein ModA (TC 3.A.1.8.1)	NA	K02020	modA; molybdate transport system substrate-binding protein	95	02010 02000	ABC transporters [PATH:ko02010], Transporters [BR:ko02000],	09131 09183	09130 09180
D|1136176.5.peg.2132	1	2442097	2442714	-	618	115.5	111	118	104.5	117.5	113	51.5	68.5	67.5	45.5	66.5	53	77.4952	77.669	83.2924	76.6925	77.3602	73.7808	77.2352	95.1175	88.0792	69.0032	93.423	79.353	80.7084	-0.113001	0.109374	-1.03316	0.301531	0.348186	ABC transporter involved in cytochrome c biogenesis%2C ATPase component CcmA	NA	K02193	ccmA; heme exporter protein A [EC:7.6.2.5]	131	02010 02000	ABC transporters [PATH:ko02010], Transporters [BR:ko02000],	09131 09183	09130 09180
D|1136176.5.peg.1154	1	1311698	1313482	-	1785	275.5	256.5	264	241	253	277	125.5	154	137.5	118.5	119	155.5	185.315	179.128	186.349	177.72	167.283	180.861	189.302	215.413	180.102	180.942	168.444	232.07	186.911	-0.114359	0.0823523	-1.38865	0.164938	0.20191	Transport ATP-binding protein CydD	NA	K16013	cydD; ATP-binding cassette, subfamily C, bacterial CydD	354	02010 02000	ABC transporters [PATH:ko02010], Transporters [BR:ko02000],	09131 09183	09130 09180
D|1136176.5.peg.3608	2	736706	737059	+	354	266	218	255	226	273	270	135	130	163	132	118	101	179.25	152.539	179.996	166.659	180.507	176.29	204.446	181.842	214.282	202.409	167.029	151.22	179.706	-0.115573	0.0896371	-1.28934	0.197279	0.237677	5-Hydroxyisourate Hydrolase (HIUase) (EC 3.5.2.17)	KEGG_ENZYME:3.5.2.17	K07127	uraH, pucM, hiuH; 5-hydroxyisourate hydrolase [EC:3.5.2.17]	82	00230 02000	Purine metabolism [PATH:ko00230], Transporters [BR:ko02000],	09104 09183	09100 09180
D|1136176.5.peg.3364	2	466989	468026	-	1038	639.5	671.5	635	678	668	728.5	296.5	364	363	381	369	313	430.604	469.513	448.226	499.976	441.68	475.331	448.267	509.159	477.205	584.227	522.319	468.632	481.262	-0.122103	0.0682826	-1.78821	0.0737426	0.0961824	putative putrescine-binding periplasmic protein	NA	K11069	potD; spermidine/putrescine transport system substrate-binding protein	56	02010 02000	ABC transporters [PATH:ko02010], Transporters [BR:ko02000],	09131 09183	09130 09180
D|1136176.5.peg.1541	1	1781943	1784165	-	2223	283	270.5	274	261.5	285	290.5	155	138.5	136.5	131.5	132	170	190.706	188.925	193.408	192.469	188.441	189.349	234.734	193.033	178.788	200.876	186.846	254.528	199.342	-0.123264	0.0833322	-1.47919	0.139089	0.173237	Ferric hydroxamate outer membrane receptor FhuA	NA	K02014	TC.FEV.OM; iron complex outermembrane recepter protein	272	02000	Transporters [BR:ko02000],	09183	09180
D|1136176.5.peg.1563	1	1822775	1823371	-	597	115	95	91	100	106	104	56	57	68	39	53	45	77.4952	66.4735	64.234	73.7427	70.087	67.9044	84.8072	79.7309	89.3938	59.8028	75.0215	67.3752	73.0057	-0.124758	0.1174	-1.06268	0.287929	0.333892	Transporter%2C LysE family	NA	K06895	lysE, argO; L-lysine exporter family protein LysE/ArgO	160	02000	Transporters [BR:ko02000],	09183	09180
D|1136176.5.peg.944	1	1068003	1069550	-	1548	802	806	779	731	814	858	385	422	473	369	410	433	540.445	563.975	549.871	539.059	538.215	560.211	583.05	590.288	621.813	565.826	580.355	648.299	573.451	-0.125505	0.0478957	-2.62039	0.00878285	0.0131771	Sulfate permease	NA	K03321	TC.SULP; sulfate permease, SulP family	335	02000	Transporters [BR:ko02000],	09183	09180
D|1136176.5.peg.4099	2	1301986	1302768	-	783	134.5	131	131.5	115	142	132.5	83.5	60.5	80	59	62	66	90.2988	91.6634	92.4687	84.8042	93.8901	86.1864	125.696	83.9272	105.169	90.4709	87.761	98.8169	94.2628	-0.132152	0.105444	-1.25329	0.210101	0.251298	ABC-type hemin transport system%2C ATPase component	NA	K02013	ABC.FEV.A; iron complex transport system ATP-binding protein [EC:7.2.2.-]	119	02000	Transporters [BR:ko02000],	09183	09180
D|1136176.5.peg.90	1	114611	115288	+	678	659	693	680.5	643	687	771	334.5	355.5	392	342	403	336	444.081	484.906	479.99	474.166	454.243	503.407	505.815	496.57	515.329	524.424	570.446	503.068	496.37	-0.1335	0.0549046	-2.4315	0.0150365	0.0218532	Cell division transporter%2C ATP-binding protein FtsE (TC 3.A.5.1.1)	NA	K09812	ftsE; cell division transport system ATP-binding protein	162	02010 03036 02000	ABC transporters [PATH:ko02010], Chromosome and associated proteins [BR:ko03036], Transporters [BR:ko02000],	09131 09182 09183	09130 09180
D|1136176.5.peg.1408	1	1655224	1656339	+	1116	5578	5508	5336	4757.5	5568.5	5895	2276.5	2989	3311	2653	3015.5	2867	3758.85	3854.06	3766.51	3507.94	3681.55	3849	3446.81	4180.98	4352.69	4068.12	4267.73	4292.55	3918.9	-0.134719	0.0570896	-2.35978	0.0182857	0.0262225	Putrescine transport ATP-binding protein PotA (TC 3.A.1.11.1)	NA	K11072	potA; spermidine/putrescine transport system ATP-binding protein [EC:7.6.2.11]	284	02010 02000	ABC transporters [PATH:ko02010], Transporters [BR:ko02000],	09131 09183	09130 09180
D|1136176.5.peg.935	1	1056194	1057786	-	1593	493	476	537	458	505	559	249	285	312	232	285	227	332.219	333.067	379.051	337.742	333.905	364.986	377.089	398.654	410.16	355.75	403.417	339.87	363.826	-0.137171	0.0658936	-2.08171	0.037369	0.0510797	Na+/H+ antiporter NhaB	NA	K03314	nhaB; Na+:H+ antiporter, NhaB family	387	02000	Transporters [BR:ko02000],	09183	09180
D|1136176.5.peg.3441	2	553235	554092	+	858	519.5	532.5	487.5	482.5	512.5	514.5	270.5	294	270	267	236.5	261	349.739	372.251	343.758	355.44	338.533	335.604	408.892	411.243	354.946	409.419	334.058	390.776	367.055	-0.13878	0.0639716	-2.1694	0.0300527	0.0417178	Putative ABC iron siderophore transporter%2C fused permease and ATPase domains	NA	K01992	ABC-2.P; ABC-2 type transport system permease protein	19	02000	Transporters [BR:ko02000],	09183	09180
D|1136176.5.peg.4460	2	1704449	1705147	+	699	1964.5	1919	1852.5	1822	2014.5	2048.5	1061	1036.5	1093.5	1068.5	985.5	870	1323.48	1342.76	1307.27	1343.59	1331.65	1337.19	1606.79	1449.14	1436.87	1637.68	1394.27	1302.59	1401.11	-0.143945	0.0540134	-2.665	0.00769891	0.0116109	Molybdenum transport system permease protein ModB (TC 3.A.1.8.1)	NA	K02018	modB; molybdate transport system permease protein	208	02010 02000	ABC transporters [PATH:ko02010], Transporters [BR:ko02000],	09131 09183	09130 09180
D|1136176.5.peg.4168	2	1380309	1381499	+	1191	222	210.5	180	211	210	211.5	86.5	104.5	124.5	119	97	128	149.599	146.941	127.056	155.597	138.852	137.768	130.24	145.474	163.012	182.475	137.303	191.645	150.497	-0.14998	0.0992993	-1.51038	0.130946	0.164199	RND efflux system%2C membrane fusion protein CmeA	NA	K03585	acrA, mexA, adeI, smeD, mtrC, cmeA; membrane fusion protein, multidrug efflux system	43	01501 01503 03036 02000 01504	beta-Lactam resistance [PATH:ko01501], Cationic antimicrobial peptide (CAMP) resistance [PATH:ko01503], Chromosome and associated proteins [BR:ko03036], Transporters [BR:ko02000], Antimicrobial resistance genes [BR:ko01504],	09175 09182 09183	09160 09180
D|1136176.5.peg.2403	1	2745615	2746343	+	729	554	603	521	499	561	594	239	290	376	259	298	306	373.325	421.932	367.757	367.976	370.932	387.839	361.945	405.648	494.295	397.152	421.819	458.151	402.398	-0.151039	0.0746339	-2.02373	0.0429981	0.0582765	Probable component of the lipoprotein assembly complex (forms a complex with YaeT%2C YfgL%2C and NlpB)	NA	K05807	bamD; outer membrane protein assembly factor BamD	153	02000	Transporters [BR:ko02000],	09183	09180
D|1136176.5.peg.2387	1	2718052	2718870	-	819	793.5	748.5	725.5	660.5	739.5	766	406	358	394	405.5	410	373.5	534.38	523.391	511.754	486.702	488.625	500.142	614.853	500.766	517.958	621.029	580.355	558.465	536.535	-0.154118	0.0611304	-2.52114	0.0116976	0.0172436	Phosphate transport ATP-binding protein PstB (TC 3.A.1.7.1)	NA	K02036	pstB; phosphate transport system ATP-binding protein [EC:7.3.2.1]	221	02010 02000	ABC transporters [PATH:ko02010], Transporters [BR:ko02000],	09131 09183	09130 09180
D|1136176.5.peg.4524	3	27896	29020	+	1125	168	175	199	169	173	210	106	77	92	106	104	96	113.21	122.451	140.468	124.625	114.387	137.115	160.528	107.707	120.945	162.541	147.212	143.734	132.91	-0.159214	0.10719	-1.48534	0.137454	0.17143	hypothetical protein	NA	K07267	oprB; porin	127	02000	Transporters [BR:ko02000],	09183	09180
D|1136176.5.peg.1165	1	1325851	1327221	-	1371	234.5	221.5	194.5	193.5	238	230	89	141.5	159	68	151	98	157.686	154.638	136.938	142.323	157.365	150.173	134.783	197.229	209.024	104.272	213.74	146.728	158.742	-0.165796	0.147004	-1.12784	0.259388	0.303471	Di-and tricarboxylate transporter	NA	K14445	SLC13A2_3_5; solute carrier family 13 (sodium-dependent dicarboxylate transporter), member 2/3/5	270	02000	Transporters [BR:ko02000],	09183	09180
D|1136176.5.peg.4131	2	1332873	1334984	-	2112	825	810	781	767	830	860	458.5	448	518	392	419	378	555.944	566.774	551.283	565.607	548.795	561.517	693.602	626.657	680.97	601.095	593.094	565.951	592.607	-0.168168	0.053858	-3.12243	0.00179367	0.0029225	Membrane protein%2C suppressor for copper-sensitivity ScsB	NA	K08344	scsB; suppressor for copper-sensitivity B	298	02000	Transporters [BR:ko02000],	09183	09180
D|1136176.5.peg.1330	1	1577815	1578579	-	765	4192	3983.5	3892.5	3865	4271	4302.5	1867.5	2200.5	2644.5	1819	2474.5	2210.5	2824.87	2786.99	2747.24	2850.16	2823.98	2808.89	2827.41	3077.33	3475.84	2789.26	3501.95	3308.87	2985.23	-0.172869	0.0615982	-2.80639	0.00500998	0.00772379	ABC-type polar amino acid transport system%2C ATPase component	NA	K09972	aapP, bztD; general L-amino acid transport system ATP-binding protein [EC:7.4.2.1]	205	02010 02000	ABC transporters [PATH:ko02010], Transporters [BR:ko02000],	09131 09183	09130 09180
D|1136176.5.peg.2890	1	3324632	3326359	-	1728	13340	13567	13600	12268	14454	13909	7444	8392	7976	5876	7445	6762	8989.44	9493.11	9599.81	9046.76	9556.96	9081.56	11273.3	11738.6	10485.4	9010.28	10538.4	10124.2	9911.49	-0.179881	0.0595152	-3.02244	0.00250742	0.00402053	Dipeptide transport ATP-binding protein DppD (TC 3.A.1.5.2)	NA	K02031	ddpD; peptide/nickel transport system ATP-binding protein	473	02024 02000	Quorum sensing [PATH:ko02024], Transporters [BR:ko02000],	09145 09183	09140 09180
D|1136176.5.peg.3049	2	107997	109547	+	1551	270	266.5	228	211.5	272.5	255	133	135	185	126.5	132.5	102.5	181.945	186.126	160.938	155.597	179.846	166.496	201.417	188.836	243.204	193.209	186.846	152.717	183.098	-0.180492	0.0971554	-1.85777	0.0632017	0.083229	Multidrug resistance protein B	NA	K03446	emrB; MFS transporter, DHA2 family, multidrug resistance protein	281	02000	Transporters [BR:ko02000],	09183	09180
D|1136176.5.peg.2388	1	2718871	2720580	-	1710	3167.5	2959.5	2948.5	2862.5	3180.5	3301	1659	1781	1828	1702.5	1603	1417.5	2134.15	2070.47	2080.9	2110.52	2102.61	2155.31	2512.41	2491.24	2403.11	2609.85	2269.05	2121.57	2255.1	-0.187033	0.0487914	-3.83333	0.000126	0.000237	Phosphate transport system permease protein PstA (TC 3.A.1.7.1)	NA	K02038	pstA; phosphate transport system permease protein	301	02010 02000	ABC transporters [PATH:ko02010], Transporters [BR:ko02000],	09131 09183	09130 09180
D|1136176.5.peg.3942	2	1103402	1104856	+	1455	1860	1715	1787	1685	1884	1936	1077	983	978	1052	914	875	1253.4	1200.02	1261.39	1242.57	1245.7	1264.07	1631.03	1375.01	1285.69	1613.14	1293.77	1310.07	1331.32	-0.187495	0.0677713	-2.76658	0.00566473	0.00868992	Gluconate permease	NA	K03299	TC.GNTP; gluconate:H+ symporter, GntP family	157	02000	Transporters [BR:ko02000],	09183	09180
D|1136176.5.peg.3060	2	135166	136515	+	1350	5994	5728.5	6143	5917	6333	6661	2469	3394.5	4028.5	2907.5	3829	3545	4039.18	4008	4336.15	4363.36	4187.37	4349.15	3739.09	4747.48	5295.27	4457.61	5419.95	5307.66	4520.86	-0.196397	0.0848929	-2.31347	0.0206968	0.0294437	HlyD family secretion protein	NA	K12542	lapC; membrane fusion protein, adhesin transport system	63	02000 02044	Transporters [BR:ko02000], Secretion system [BR:ko02044],	09183	09180
D|1136176.5.peg.1433	1	1685569	1686267	+	699	2164.5	2101.5	2115	1964	2229.5	2198	973	1054.5	1448.5	1112	1185	1224.5	1458.26	1470.11	1492.91	1448.31	1473.81	1435.13	1473.53	1474.32	1903.56	1705.15	1677.37	1832.6	1570.42	-0.197852	0.0650754	-3.04035	0.00236306	0.00379824	ABC-type tungstate transport system%2C permease protein	NA	K05773	tupB, vupB; tungstate transport system permease protein	138	02010 02000	ABC transporters [PATH:ko02010], Transporters [BR:ko02000],	09131 09183	09130 09180
D|1136176.5.peg.1018	1	1155762	1156409	-	648	563	511	455	451	534	555	216	277	357	215	327	299	379.39	357.557	321.17	332.58	353.08	362.374	327.114	387.464	469.317	329.682	462.868	447.67	377.522	-0.204447	0.0978505	-2.08938	0.0366737	0.0501737	Chaperone protein TorD	NA	K03533	torD; TorA specific chaperone	108	00680 02020 03110 02000	Methane metabolism [PATH:ko00680], Two-component system [PATH:ko02020], Chaperones and folding catalysts [BR:ko03110], Transporters [BR:ko02000],	09102 09132 09182 09183	09100 09130 09180
D|1136176.5.peg.303	1	342080	342796	-	717	1191	1205	1185.5	1130.5	1289	1319.5	670	681	779	651	664.5	582.5	802.581	843.163	836.454	833.293	852.285	861.211	1014.66	952.574	1024.08	998.246	939.892	871.385	902.486	-0.20628	0.0458755	-4.49652	6.91e-06	1.46e-05	ABC transporter ATP-binding protein YvcR	NA	K02003	ABC.CD.A; putative ABC transport system ATP-binding protein	121	02000	Transporters [BR:ko02000],	09183	09180
D|1136176.5.peg.643	1	732335	733780	+	1446	2194	2061	2115	2047	2226	2211	1187	1142	1246	1365	1083	1033	1478.47	1442.12	1492.91	1509.51	1471.83	1443.62	1797.61	1597.42	1638.01	2093.1	1532.99	1546.63	1587.02	-0.207012	0.0728169	-2.84291	0.00447033	0.00692632	PTS system%2C trehalose-specific IIB component (EC 2.7.1.69) / PTS system%2C trehalose-specific IIC component (EC 2.7.1.69)	KEGG_ENZYME:2.7.1.69,KEGG_ENZYME:2.7.1.69	K02819	treB, treP; trehalose PTS system EIIBC or EIIBCA component [EC:2.7.1.201]	359	00500 02060 02000	Starch and sucrose metabolism [PATH:ko00500], Phosphotransferase system (PTS) [PATH:ko02060], Transporters [BR:ko02000],	09101 09131 09183	09100 09130 09180
D|1136176.5.peg.3064	2	141722	143860	+	2139	4545	4366	4532	4284	4726	5149	1829	2643.5	3302	1800	3071.5	2658.5	3062.75	3054.98	3198.99	3159.14	3124.82	3361.92	2769.87	3697	4340.86	2760.13	4347	3979.63	3404.76	-0.207618	0.11676	-1.77816	0.0753781	0.0980676	D01200333: hypothetical protein	NA	K12541	lapB; ATP-binding cassette, subfamily C, bacterial LapB	123	02010 02000 02044	ABC transporters [PATH:ko02010], Transporters [BR:ko02000], Secretion system [BR:ko02044],	09131 09183	09130 09180
D|1136176.5.peg.749	1	841127	841636	-	510	1836	1990	1842	1718	1991	2055	963	999	1347	869	1111	1031	1237.23	1392.44	1300.21	1266.9	1316.45	1341.77	1458.38	1397.39	1770.79	1332.53	1572.62	1543.64	1410.86	-0.209077	0.0665822	-3.14013	0.00168873	0.00276218	PTS system%2C glucose-specific IIA component	NA	K02777	crr; sugar PTS system EIIA component [EC:2.7.1.-]	146	00010 00500 00520 02060 05111 02026 02000	Glycolysis / Gluconeogenesis [PATH:ko00010], Starch and sucrose metabolism [PATH:ko00500], Amino sugar and nucleotide sugar metabolism [PATH:ko00520], Phosphotransferase system (PTS) [PATH:ko02060], Biofilm formation - Vibrio cholerae [PATH:ko05111], Biofilm formation - Escherichia coli [PATH:ko02026], Transporters [BR:ko02000],	09101 09131 09145 09183	09100 09130 09140 09180
D|1136176.5.peg.3789	2	935739	936497	+	759	8063	7655	8223	8092	8708	8705	4166	4680	4919	4463	4869	4220	5433.42	5356.36	5804.35	5967.26	5757.71	5683.73	6309.05	6546.33	6466.59	6843.58	6892.07	6318.29	6114.9	-0.211712	0.0385974	-5.48513	4.13e-08	1.05e-07	ABC-type amino acid transport/signal transduction system	NA	K02030	ABC.PA.S; polar amino acid transport system substrate-binding protein	15	02000	Transporters [BR:ko02000],	09183	09180
D|1136176.5.peg.1886	1	2170791	2173253	-	2463	72164	69940	66445	61606	71343.5	70148.5	36494	36926.5	41644	36200	37483.5	38342	48629.3	48938.5	46901.4	45430	47171.9	45801.5	55267.1	51651.6	54745.8	55509.2	53057.2	57406.6	50875.8	-0.211924	0.0331537	-6.39216	1.64e-10	4.87e-10	Trimethylamine-N-oxide reductase (EC 1.6.6.9)	KEGG_ENZYME:1.6.6.9	K07811	torA; trimethylamine-N-oxide reductase (cytochrome c) [EC:1.7.2.3]	614	00680 02020 02000	Methane metabolism [PATH:ko00680], Two-component system [PATH:ko02020], Transporters [BR:ko02000],	09102 09132 09183	09100 09130 09180
D|1136176.5.peg.3205	2	305797	306414	+	618	1221	1133.5	1177	1131	1250	1277.5	607	724	697	709	627.5	605	822.797	792.783	830.807	834.03	826.498	833.788	919.25	1012.72	916.286	1087.18	887.518	905.821	889.124	-0.21283	0.052707	-4.03798	5.39e-05	0.000104	Glutathione-regulated potassium-efflux system ancillary protein KefG	NA	K11748	kefG; glutathione-regulated potassium-efflux system ancillary protein KefG	87	02000	Transporters [BR:ko02000],	09183	09180
D|1136176.5.peg.3405	2	510100	511014	+	915	688	681	697	685.5	777.5	749.5	378	445	403	342	481	320.5	463.623	476.51	491.99	505.138	513.751	489.042	572.449	622.46	529.79	524.424	680.855	479.112	529.095	-0.214298	0.077937	-2.74963	0.00596617	0.00914026	Eukaryotic-type low-affinity urea transporter	NA	K08717	utp; urea transporter	62	02000	Transporters [BR:ko02000],	09183	09180
D|1136176.5.peg.1331	1	1578602	1579699	-	1098	4133.5	3918.5	3727	3598	4136	4318.5	1766.5	2375.5	2728.5	1837	2273	2298	2785.11	2741.51	2630.77	2653.26	2734.72	2819.34	2674.46	3322.12	3586.27	2816.86	3217.43	3440.62	2951.87	-0.220122	0.0705894	-3.11835	0.00181869	0.00295911	Glutamate Aspartate transport system permease protein GltK (TC 3.A.1.3.4)	NA	K09971	aapM, bztC; general L-amino acid transport system permease protein	259	02010 02000	ABC transporters [PATH:ko02010], Transporters [BR:ko02000],	09131 09183	09130 09180
D|1136176.5.peg.3965	2	1131833	1134925	-	3093	175	168	163	171	185	191	107	106	126	64	78.5	106	117.927	117.553	115.057	126.1	122.322	124.709	162.042	148.271	165.641	98.1379	110.409	158.706	130.573	-0.222941	0.113618	-1.9622	0.0497396	0.0666737	Tetrathionate reductase subunit A	NA	K08357	ttrA; tetrathionate reductase subunit A	656	00920 02020 02000	Sulfur metabolism [PATH:ko00920], Two-component system [PATH:ko02020], Transporters [BR:ko02000],	09102 09132 09183	09100 09130 09180
D|1136176.5.peg.3823	2	979204	980139	-	936	2399.5	2215	2303	2092.5	2412	2461.5	1277	1397.5	1426	1259.5	1274.5	1215.5	1616.62	1549.88	1625.61	1542.7	1594.81	1606.85	1933.91	1954.11	1874.64	1930.56	1803.35	1819.13	1737.68	-0.246418	0.033651	-7.32277	2.43e-13	8.62e-13	Magnesium and cobalt transport protein CorA	NA	K16074	zntB; zinc transporter	133	02000	Transporters [BR:ko02000],	09183	09180
D|1136176.5.peg.486	1	549287	550300	+	1014	346	342	326	309	365	363	203	194	207	166	201	189	233.159	239.304	230.113	227.865	241.337	237.013	307.426	271.365	272.125	254.545	284.515	282.976	256.812	-0.246908	0.0650419	-3.79613	0.000147	0.000273	Ferric iron ABC transporter%2C iron-binding protein	NA	K02012	afuA, fbpA; iron(III) transport system substrate-binding protein	245	02010 02000	ABC transporters [PATH:ko02010], Transporters [BR:ko02000],	09131 09183	09130 09180
D|1136176.5.peg.3174	2	268558	269796	+	1239	292	278	260	264	261	269	173	172	152	126	143	156	196.77	194.522	183.526	194.681	172.573	175.637	261.994	240.591	199.821	193.209	202.416	233.567	204.109	-0.251939	0.0842561	-2.99015	0.00278838	0.00444646	Oxalate/formate antiporter	NA	K08177	oxlT; MFS transporter, OFA family, oxalate/formate antiporter	225	02000	Transporters [BR:ko02000],	09183	09180
D|1136176.5.peg.4212	2	1427982	1429184	+	1203	250.5	237	244	215	269	277	126.5	185	150	131	141	116	168.468	165.834	172.232	158.547	177.862	180.861	190.816	258.776	197.192	200.876	199.585	173.678	187.061	-0.254983	0.0882629	-2.8889	0.00386592	0.00603822	probable multidrug resistance protein	NA	K07552	bcr, tcaB; MFS transporter, DHA1 family, multidrug resistance protein	59	02000	Transporters [BR:ko02000],	09183	09180
D|1136176.5.peg.2389	1	2720704	2722920	-	2217	1379	1260	1348	1315	1451	1497	728	870	866	773	756	714	929.269	881.648	951.51	969.717	959.399	977.432	1102.49	1216.95	1138.46	1185.32	1070.12	1069.02	1037.61	-0.25883	0.0466163	-5.55236	2.82e-08	7.28e-08	Phosphate transport system permease protein PstC (TC 3.A.1.7.1)	NA	K02037	pstC; phosphate transport system permease protein	348	02010 02000	ABC transporters [PATH:ko02010], Transporters [BR:ko02000],	09131 09183	09130 09180
D|1136176.5.peg.4319	2	1555045	1555665	-	621	333	325	308	314	288	321	257	169	162	183	166	143	224.399	227.409	217.407	231.552	190.425	209.59	389.205	236.395	212.968	280.613	234.973	214.103	239.087	-0.268009	0.134334	-1.99509	0.0460333	0.0620821	Glutathione S-transferase (EC 2.5.1.18)	KEGG_ENZYME:2.5.1.18	K00799	GST, gst; glutathione S-transferase [EC:2.5.1.18]	84	00480 00980 00982 00983 04212 05200 05204 05225 05418 01524 02000	Glutathione metabolism [PATH:ko00480], Metabolism of xenobiotics by cytochrome P450 [PATH:ko00980], Drug metabolism - cytochrome P450 [PATH:ko00982], Drug metabolism - other enzymes [PATH:ko00983], Longevity regulating pathway - worm [PATH:ko04212], Pathways in cancer [PATH:ko05200], Chemical carcinogenesis [PATH:ko05204], Hepatocellular carcinoma [PATH:ko05225], Fluid shear stress and atheroscle…	09106 09111 09149 09161 09162 09166 09176 09183	09100 09150 09160 09180
D|1136176.5.peg.4461	2	1705144	1706250	+	1107	1189.5	1175	1157.5	1083.5	1268.5	1238.5	753.5	714	723.5	574	648.5	672	801.233	822.172	816.689	798.634	838.399	808.324	1140.35	998.734	950.466	880.174	917.244	1006.14	898.213	-0.270042	0.0574868	-4.69747	2.63e-06	5.76e-06	Molybdenum transport ATP-binding protein ModC (TC 3.A.1.8.1)	NA	K02017	modC; molybdate transport system ATP-binding protein [EC:7.3.2.5]	181	02010 02000	ABC transporters [PATH:ko02010], Transporters [BR:ko02000],	09131 09183	09130 09180
D|1136176.5.peg.1858	1	2139709	2140875	+	1167	3737	3428	3600	3587.5	3890	3941	2100.5	2133.5	2181	2267	2017.5	2121.5	2518.26	2398.64	2541.13	2645.15	2572.06	2573.19	3180.27	2983.61	2867.17	3476.23	2855.06	3175.62	2815.53	-0.281308	0.0524283	-5.36557	8.07e-08	2.01e-07	ABC transporter%2C periplasmic substrate-binding protein YnjB	NA	K05777	ABC.VB1X.S; putative thiamine transport system substrate-binding protein	234	02000	Transporters [BR:ko02000],	09183	09180
D|1136176.5.peg.896	1	1008465	1009346	+	882	238	232	244	228	266	270	148	109	139	156	146	156	160.381	162.335	172.232	168.133	175.879	176.29	224.133	152.468	182.731	239.211	206.663	233.567	187.835	-0.28256	0.0964734	-2.92889	0.00340175	0.00534561	Sodium-type flagellar protein motY precursor	NA	K21218	motY; sodium-type flagellar protein MotY	162	02040 02000 02035	Flagellar assembly [PATH:ko02040], Transporters [BR:ko02000], Bacterial motility proteins [BR:ko02035],	09142 09183	09140 09180
D|1136176.5.peg.1042	1	1186837	1187280	+	444	597.5	541	553.5	484	608	576.5	295	350	357	281.5	377.5	290	402.301	378.549	390.345	356.915	402.009	376.086	446.752	489.576	469.317	430.887	533.643	434.195	425.881	-0.283238	0.0632232	-4.47997	7.47e-06	1.58e-05	Tol biopolymer transport system%2C TolR protein	NA	K03560	tolR; biopolymer transport protein TolR	108	02000	Transporters [BR:ko02000],	09183	09180
D|1136176.5.peg.3347	2	443776	445500	-	1725	173.5	173	152	155.5	166	182	91.5	98	99.5	90.5	96.5	107	116.58	121.052	107.292	114.301	109.759	118.833	137.812	137.081	130.147	138.006	135.888	160.203	127.246	-0.284509	0.0886332	-3.20996	0.00132752	0.0022119	Ferric iron ABC transporter%2C permease protein	NA	K02011	afuB, fbpB; iron(III) transport system permease protein	281	02010 02000	ABC transporters [PATH:ko02010], Transporters [BR:ko02000],	09131 09183	09130 09180
D|1136176.5.peg.4553	3	51127	52251	-	1125	86	95	80.5	86	99	93	62	58	73	49	49	24	57.9529	66.4735	56.4695	63.4188	65.4586	60.7222	93.8937	81.1297	95.9668	75.1368	69.3595	35.9334	68.493	-0.288931	0.158967	-1.81756	0.0691321	0.0905506	Putative periplasmic binding protein	NA	K02016	ABC.FEV.S; iron complex transport system substrate-binding protein	121	02000	Transporters [BR:ko02000],	09183	09180
D|1136176.5.peg.3846	2	1009163	1010434	+	1272	398.5	392.5	382	356	447	393	231.5	209	251	203	215.5	270.5	268.201	274.29	269.642	262.524	295.556	256.6	349.83	292.347	329.968	311.281	304.332	404.251	301.569	-0.290603	0.0783975	-3.70679	0.00021	0.000384	L-proline glycine betaine ABC transport system permease protein ProV (TC 3.A.1.12.1)	NA	K02000	proV; glycine betaine/proline transport system ATP-binding protein [EC:7.6.2.9]	202	02010 02000	ABC transporters [PATH:ko02010], Transporters [BR:ko02000],	09131 09183	09130 09180
D|1136176.5.peg.3132	2	221143	222165	-	1023	362	337.5	324	320.5	340	355	176	187.5	247	145	238	202	243.941	235.806	228.701	235.977	224.807	231.789	266.537	261.573	324.71	222.344	336.889	302.44	259.626	-0.294165	0.0881926	-3.33549	0.000851	0.00145585	Oligopeptide transport system permease protein OppC (TC 3.A.1.5.1)	NA	K13895	yejE; microcin C transport system permease protein	321	02010 02000	ABC transporters [PATH:ko02010], Transporters [BR:ko02000],	09131 09183	09130 09180
D|1136176.5.peg.3131	2	219484	221133	-	1650	779	750.5	741	700.5	752	782	351	427.5	535	352	497	490	524.946	524.79	523.048	516.199	497.221	510.589	531.56	597.282	703.319	539.758	703.503	733.641	575.488	-0.299875	0.0826264	-3.62929	0.000284	0.000512	Oligopeptide transport ATP-binding protein OppF (TC 3.A.1.5.1)	NA	K13896	yejF; microcin C transport system ATP-binding protein	316	02010 02000	ABC transporters [PATH:ko02010], Transporters [BR:ko02000],	09131 09183	09130 09180
D|1136176.5.peg.1041	1	1186150	1186833	+	684	884.5	855.5	840	802	928.5	829.5	486	520	582.5	456.5	480.5	497	595.702	598.261	592.929	591.417	613.592	541.277	736.006	727.369	765.106	699.232	679.44	744.121	657.038	-0.301297	0.0493428	-6.10621	1.02e-09	2.88e-09	MotA/TolQ/ExbB proton channel family protein	NA	K03562	tolQ; biopolymer transport protein TolQ	166	02000	Transporters [BR:ko02000],	09183	09180
D|1136176.5.peg.3757	2	903196	903816	-	621	154	143	135	115	135	154	83	113	75	80	69	71	103.776	100.06	95.2922	84.8042	89.2618	100.551	125.696	158.063	98.5961	122.672	97.6695	106.303	106.895	-0.303141	0.116765	-2.59616	0.00942733	0.0140577	Glutathione S-transferase%2C unnamed subgroup (EC 2.5.1.18)	KEGG_ENZYME:2.5.1.18	K00799	GST, gst; glutathione S-transferase [EC:2.5.1.18]	121	00480 00980 00982 00983 04212 05200 05204 05225 05418 01524 02000	Glutathione metabolism [PATH:ko00480], Metabolism of xenobiotics by cytochrome P450 [PATH:ko00980], Drug metabolism - cytochrome P450 [PATH:ko00982], Drug metabolism - other enzymes [PATH:ko00983], Longevity regulating pathway - worm [PATH:ko04212], Pathways in cancer [PATH:ko05200], Chemical carcinogenesis [PATH:ko05204], Hepatocellular carcinoma [PATH:ko05225], Fluid shear stress and atheroscle…	09106 09111 09149 09161 09162 09166 09176 09183	09100 09150 09160 09180
D|1136176.5.peg.803	1	898493	899278	-	786	195.5	187	192.5	170.5	172	203.5	95	102	115	101	122.5	127	131.405	130.848	135.527	125.363	113.726	132.544	143.869	142.676	151.181	154.874	172.691	190.148	143.738	-0.311568	0.090388	-3.44701	0.000567	0.000988	Zinc ABC transporter%2C inner membrane permease protein ZnuB	NA	K09816	znuB; zinc transport system permease protein	214	02010 02000	ABC transporters [PATH:ko02010], Transporters [BR:ko02000],	09131 09183	09130 09180
D|1136176.5.peg.158	1	203936	205687	+	1752	954	944	891.5	823	922.5	1027.5	492.5	535	627	402	650	592.5	642.873	660.536	628.929	606.903	609.625	670.556	745.092	748.351	824.263	616.429	920.075	886.358	713.332	-0.312293	0.0854822	-3.6533	0.000259	0.00047	K+/H+ antiporter	NA	K11105	cvrA, nhaP2; potassium/hydrogen antiporter	332	02000	Transporters [BR:ko02000],	09183	09180
D|1136176.5.peg.3551	2	679651	680784	-	1134	101	123	90	104	95	116	55	77	63	75	45	59	68.061	86.0656	63.5281	76.6925	62.8138	75.7395	83.2928	107.707	82.8207	115.005	63.6975	88.3363	81.1467	-0.319506	0.135526	-2.35753	0.0183969	0.0263739	Long-chain fatty acid transport protein	NA	K06076	fadL; long-chain fatty acid transport protein	32	02000	Transporters [BR:ko02000],	09183	09180
D|1136176.5.peg.1057	1	1202407	1202871	+	465	561	588	514.5	471.5	552.5	571	271	324	412	281.5	344.5	313.5	378.042	411.436	362.816	347.328	364.981	372.821	410.407	453.207	541.621	430.887	486.932	468.632	419.092	-0.321433	0.0714534	-4.4985	6.84e-06	1.45e-05	TRAP-type transport system%2C small permease component%2C predicted N-acetylneuraminate transporter	NA	K21394	yiaM; TRAP-type transport system small permease protein	12	02000	Transporters [BR:ko02000],	09183	09180
D|1136176.5.peg.1329	1	1576869	1577534	-	666	5579	5514	5419	5141	5723	5762	3270	3052	3602	3360	3247	3288	3759.53	3858.26	3825.1	3791.11	3784.04	3762.17	4952.14	4269.1	4735.24	5152.24	4596.13	4922.88	4283.99	-0.329325	0.0437336	-7.53025	5.06e-14	1.87e-13	Putative TEGT family carrier/transport protein	NA	K19416	yccA; modulator of FtsH protease	191	02000	Transporters [BR:ko02000],	09183	09180
D|1136176.5.peg.1053	1	1198252	1199466	+	1215	261	245	227	252	279	303	157	177	154	138	169	147	175.88	171.432	160.232	185.832	184.474	197.837	237.763	247.585	202.451	211.61	239.219	220.092	202.867	-0.335658	0.0795636	-4.21874	2.46e-05	4.93e-05	Sodium/glutamate symporter	NA	K03312	gltS; glutamate:Na+ symporter, ESS family	211	02000	Transporters [BR:ko02000],	09183	09180
D|1136176.5.peg.3043	2	101843	103036	+	1194	239.5	264.5	262.5	216	249	280.5	154.5	141	175.5	152	167.5	120	161.055	184.726	184.937	159.284	164.638	182.82	233.22	197.229	230.058	233.077	236.388	179.667	195.592	-0.336252	0.085237	-3.94491	7.98e-05	0.000152	hypothetical protein	NA	K03449	MFS.CP; MFS transporter, CP family, cyanate transporter	143	02000	Transporters [BR:ko02000],	09183	09180
D|1136176.5.peg.1747	1	2020950	2022266	-	1317	3253	3111	3011	2910	3177	3376	2015	1862	2079	1839	1719	1878	2192.1	2176.83	2125.37	2145.91	2100.63	2204.28	3051.55	2604.54	2733.08	2819.93	2433.24	2811.79	2449.94	-0.345609	0.0504906	-6.84501	7.65e-12	2.47e-11	D01201336: hypothetical protein	NA	K07274	mipA, ompV; MipA family protein	259	02000	Transporters [BR:ko02000],	09183	09180
D|1136176.5.peg.1656	1	1921654	1922412	-	759	57	60.5	58	57	61	71.5	30.5	38	47.5	25	42	39.5	38.4107	41.9832	40.9404	42.0334	40.3331	46.3578	45.4325	53.1539	61.7869	38.3351	59.451	58.3918	47.2175	-0.34703	0.140767	-2.46527	0.0136909	0.0200167	Vitamin B12 ABC transporter%2C ATPase component BtuD	NA	K06074	btuD; vitamin B12 transport system ATP-binding protein [EC:7.6.2.8]	108	02010 02000	ABC transporters [PATH:ko02010], Transporters [BR:ko02000],	09131 09183	09130 09180
D|1136176.5.peg.356	1	390770	391840	+	1071	889	823.5	852	762.5	883	925.5	501.5	477.5	565.5	495.5	564	526.5	599.072	575.87	601.4	561.92	583.838	603.957	758.722	667.222	742.757	759.035	798.342	787.541	669.973	-0.355129	0.0500843	-7.09063	1.34e-12	4.52e-12	D000906: Predicted Permease	NA	K11720	lptG; lipopolysaccharide export system permease protein	221	02010 02000	ABC transporters [PATH:ko02010], Transporters [BR:ko02000],	09131 09183	09130 09180
D|1136176.5.peg.1548	1	1805921	1806700	-	780	96.5	99	91	86	112	106.5	60.5	56.5	52	67.5	75	50	64.6916	69.2723	64.234	63.4188	74.0542	69.2103	90.8649	78.3321	68.3599	102.738	106.162	74.8613	77.1833	-0.358734	0.118897	-3.01718	0.00255142	0.00408544	Ferric hydroxamate ABC transporter (TC 3.A.1.14.3)%2C ATP-binding protein FhuC	NA	K10829	fhuC; ferric hydroxamate transport system ATP-binding protein [EC:7.2.2.16]	157	02010 02000	ABC transporters [PATH:ko02010], Transporters [BR:ko02000],	09131 09183	09130 09180
D|1136176.5.peg.3348	2	445507	446616	-	1110	293.5	263	273	256.5	286	273	148.5	183	193.5	170.5	137.5	177	197.444	184.027	192.702	188.781	189.103	178.249	224.133	255.978	253.721	260.679	193.923	265.009	215.312	-0.362692	0.07874	-4.60619	4.1e-06	8.86e-06	Ferric iron ABC transporter%2C ATP-binding protein	NA	K02010	afuC, fbpC; iron(III) transport system ATP-binding protein [EC:7.2.2.7]	177	02010 02000	ABC transporters [PATH:ko02010], Transporters [BR:ko02000],	09131 09183	09130 09180
D|1136176.5.peg.1990	1	2282440	2285538	-	3099	1201.5	1088	1059	1062	1146	1134	1062.5	780	656	522.5	563.5	522	809.319	761.296	747.514	783.148	757.733	740.419	1608.31	1091.05	862.387	800.437	796.926	781.552	878.341	-0.368963	0.160309	-2.30157	0.0213592	0.0303487	Cobalt-zinc-cadmium resistance protein CzcA%3B Cation efflux system protein CusA	NA	K18303	mexK; multidrug efflux pump	160	02000 01504	Transporters [BR:ko02000], Antimicrobial resistance genes [BR:ko01504],	09183	09180
D|1136176.5.peg.585	1	669867	670718	+	852	4692	4594.5	4770	4444.5	4951.5	5228	2748	2964	3315	2784.5	3202	2692	3161.8	3214.52	3366.99	3277.13	3273.59	3413.5	4161.61	4146.01	4357.95	4269	4532.43	4030.53	3767.09	-0.371816	0.0358115	-10.3826	2.98e-25	1.92e-24	Multiple sugar ABC transporter%2C membrane-spanning permease protein MsmG	NA	K02026	ABC.MS.P1; multiple sugar transport system permease protein	282	02000	Transporters [BR:ko02000],	09183	09180
D|1136176.5.peg.3673	2	821637	822593	+	957	257	229	245	232	279	252	156	188	130	159	165	123	173.185	160.236	172.938	171.083	184.474	164.538	236.249	262.972	170.9	243.811	233.557	184.159	196.508	-0.373615	0.0990509	-3.77195	0.000162	0.0003	Transporter	NA	K13936	mdcF; malonate transporter and related proteins	217	02000	Transporters [BR:ko02000],	09183	09180
D|1136176.5.peg.1535	1	1775527	1776897	-	1371	862	861	801	763	877	860	508	553	536	406	572	547	580.877	602.459	565.4	562.657	579.871	561.517	769.323	773.529	704.633	622.562	809.666	818.982	662.623	-0.381926	0.063826	-5.98386	2.18e-09	6.08e-09	Glycerol-3-phosphate transporter	NA	K02445	glpT; MFS transporter, OPA family, glycerol-3-phosphate transporter	350	02000	Transporters [BR:ko02000],	09183	09180
D|1136176.5.peg.322	1	363093	363368	-	276	109	112	128	95	105.5	128	69	69	80.5	61.5	67	75.5	73.452	78.3687	90.3511	70.0556	69.4258	83.5747	104.495	96.5163	105.169	93.5377	94.8385	112.292	89.3397	-0.383246	0.107943	-3.55043	0.000385	0.000682	Phosphocarrier protein%2C nitrogen regulation associated	NA	K08485	ptsO, npr; phosphocarrier protein NPr	62	02060 02000	Phosphotransferase system (PTS) [PATH:ko02060], Transporters [BR:ko02000],	09131 09183	09130 09180
D|1136176.5.peg.4136	2	1336443	1338047	+	1605	6784	6185	6522	6147	7102	7038	3661	3878	4358	4194	4423	4219	4571.54	4327.77	4603.67	4532.97	4695.83	4595.3	5544.27	5424.5	5729.09	6431.1	6260.75	6316.79	5252.8	-0.385685	0.0501834	-7.68552	1.52e-14	5.86e-14	Small-conductance mechanosensitive channel	NA	K03442	mscS; small conductance mechanosensitive channel	167	02000	Transporters [BR:ko02000],	09183	09180
D|1136176.5.peg.471	1	529360	530130	+	771	298.5	283	290.5	286	318	311.5	169	165	194.5	140	199	246	200.814	198.021	204.702	210.904	210.261	203.06	255.936	230.8	255.035	214.677	281.684	368.317	236.184	-0.387383	0.107465	-3.60475	0.000312	0.000561	ABC-type multidrug transport system%2C permease component	NA	K01992	ABC-2.P; ABC-2 type transport system permease protein	240	02000	Transporters [BR:ko02000],	09183	09180
D|1136176.5.peg.4017	2	1203966	1205078	-	1113	2046	2046	2044	1874	2171	2115	1282	1171	1429	1304	1232	1254	1378.74	1431.63	1442.79	1381.94	1435.46	1380.94	1941.48	1637.98	1878.58	1999.56	1743.9	1877.52	1627.54	-0.38998	0.0493108	-7.90861	2.6e-15	1.05e-14	Maltose/maltodextrin transport ATP-binding protein MalK (EC 3.6.3.19)	KEGG_ENZYME:3.6.3.19	K10111	malK, mtlK, thuK; multiple sugar transport system ATP-binding protein [EC:3.6.3.-]	283	02010 02000	ABC transporters [PATH:ko02010], Transporters [BR:ko02000],	09131 09183	09130 09180
D|1136176.5.peg.1608	1	1878107	1878595	+	489	22.5	29.5	41.5	26	36.5	20.5	20	28	14	12	14	21	14.8252	20.2919	28.9406	19.1731	23.8031	13.0585	30.2883	39.166	18.4046	18.4009	19.817	31.4417	23.1342	-0.392199	0.240875	-1.62822	0.103478	0.131782	TRAP-type transport system%2C small permease component%2C predicted N-acetylneuraminate transporter	NA	K21394	yiaM; TRAP-type transport system small permease protein	14	02000	Transporters [BR:ko02000],	09183	09180
D|1136176.5.peg.4003	2	1187724	1188545	+	822	207	178	183	201	238	221	133	148	127	137	112	114	139.491	124.55	129.174	148.223	157.365	144.297	201.417	207.021	166.956	210.076	158.536	170.684	163.149	-0.399933	0.0948557	-4.21623	2.48e-05	4.98e-05	Phosphate ABC transporter%2C periplasmic phosphate-binding protein PstS (TC 3.A.1.7.1)	NA	K02040	pstS; phosphate transport system substrate-binding protein	154	02010 02020 05152 02000	ABC transporters [PATH:ko02010], Two-component system [PATH:ko02020], Tuberculosis [PATH:ko05152], Transporters [BR:ko02000],	09131 09132 09171 09183	09130 09160 09180
D|1136176.5.peg.3357	2	456648	458015	-	1368	2490.5	2414.5	2281.5	2035.5	2421.5	2543.5	1095.5	1497.5	1944	1109.5	1782	1549	1677.94	1689.13	1610.09	1500.66	1600.76	1660.39	1658.28	2093.98	2555.61	1700.55	2522.42	2319.2	1882.42	-0.40028	0.108857	-3.67713	0.000236	0.000429	Potassium uptake protein%2C integral membrane component%2C KtrB	NA	K03498	trkH, trkG, ktrB; trk system potassium uptake protein	188	02000	Transporters [BR:ko02000],	09183	09180
D|1136176.5.peg.1117	1	1266293	1268731	-	2439	284.5	266.5	240	240	235	280	108	155.5	217	92	229.5	180.5	191.379	186.126	169.408	176.983	155.382	182.82	163.557	216.812	285.271	141.073	324.149	269.501	205.205	-0.400926	0.171034	-2.34413	0.0190715	0.0272988	Anaerobic dimethyl sulfoxide reductase chain A (EC 1.8.5.3)	KEGG_ENZYME:1.8.5.3	K07306	dmsA; anaerobic dimethyl sulfoxide reductase subunit A [EC:1.8.5.3]	578	00920 02000	Sulfur metabolism [PATH:ko00920], Transporters [BR:ko02000],	09102 09183	09100 09180
D|1136176.5.peg.3953	2	1118161	1119369	+	1209	243	218	194	221	213	237	113	130	162	116	162	153	163.751	152.539	136.938	162.971	140.835	154.744	171.129	181.842	212.968	177.875	229.311	229.076	176.165	-0.401029	0.0923906	-4.34058	1.42e-05	2.92e-05	Maltoporin (maltose/maltodextrin high-affinity receptor%2C phage lambda receptor protein)	NA	K02024	lamB; maltoporin	185	02000	Transporters [BR:ko02000],	09183	09180
D|1136176.5.peg.2524	1	2891023	2892348	+	1326	6864	6594	6728	6401	7310	7108	3797	3968	4789	4656	4307	4291	4625.45	4613.96	4749.08	4720.27	4833.36	4641.01	5750.23	5550.39	6295.69	7139.53	6096.56	6424.6	5453.34	-0.402569	0.0569287	-7.07146	1.53e-12	5.17e-12	Type I secretion outer membrane protein%2C TolC precursor	NA	K12340	tolC; outer membrane protein	276	03070 02020 04626 05133 01501 01503 02000 02044 01504	Bacterial secretion system [PATH:ko03070], Two-component system [PATH:ko02020], Plant-pathogen interaction [PATH:ko04626], Pertussis [PATH:ko05133], beta-Lactam resistance [PATH:ko01501], Cationic antimicrobial peptide (CAMP) resistance [PATH:ko01503], Transporters [BR:ko02000], Secretion system [BR:ko02044], Antimicrobial resistance genes [BR:ko01504],	09131 09132 09159 09171 09175 09183	09130 09150 09160 09180
D|1136176.5.peg.577	1	658232	659374	-	1143	141	151	166	138	200	181	126	90	106	104	111	78	95.0159	105.658	117.174	101.765	132.24	118.18	190.816	125.891	139.349	159.474	157.12	116.784	129.956	-0.405671	0.121863	-3.32892	0.000872	0.0014879	Chromate transport protein ChrA	NA	K07240	chrA; chromate transporter	249	02000	Transporters [BR:ko02000],	09183	09180
D|1136176.5.peg.1887	1	2173278	2174459	-	1182	20433	19912	19504	17808	20745.5	20551.5	11029	12347.5	13996	12414	12913.5	12474	13769.2	13932.8	13767.3	13132.1	13716.6	13418.3	16702.5	17270.8	18399.3	19035.7	18278.3	18676.4	15841.6	-0.406811	0.0368199	-11.0487	2.22e-28	1.62e-27	Cytochrome c-type protein NapC	NA	K03532	torC; trimethylamine-N-oxide reductase (cytochrome c), cytochrome c-type subunit TorC	260	00680 02020 02000	Methane metabolism [PATH:ko00680], Two-component system [PATH:ko02020], Transporters [BR:ko02000],	09102 09132 09183	09100 09130 09180
D|1136176.5.peg.3402	2	506457	507722	+	1266	611	574	564	635	568	645	360	419	418	377	385	339	411.735	401.64	398.11	468.266	375.561	421.138	545.189	586.092	549.509	578.093	544.967	507.559	482.322	-0.420174	0.063271	-6.64086	3.12e-11	9.77e-11	Amino acid transporter	NA	K16263	yjeH; amino acid efflux transporter	166	02000	Transporters [BR:ko02000],	09183	09180
D|1136176.5.peg.3169	2	263510	265270	+	1761	7229	6729.5	7042.5	6685.5	7829.5	7452.5	5063.5	4816	4201	5036	4169	4049.5	4871.42	4708.42	4970.72	4929.7	5176.52	4865.61	7667.48	6736.56	5522.69	7722.22	5901.22	6062.27	5761.24	-0.423979	0.0844851	-5.01838	5.21e-07	1.23e-06	PTS system%2C fructose-specific IIB component (EC 2.7.1.69) / PTS system%2C fructose-specific IIC component (EC 2.7.1.69)	KEGG_ENZYME:2.7.1.69,KEGG_ENZYME:2.7.1.69	K02770	fruA; fructose PTS system EIIBC or EIIC component [EC:2.7.1.202]	391	00051 02060 02000	Fructose and mannose metabolism [PATH:ko00051], Phosphotransferase system (PTS) [PATH:ko02060], Transporters [BR:ko02000],	09101 09131 09183	09100 09130 09180
D|1136176.5.peg.4244	2	1462134	1463066	+	933	112	104	111	98	135	123	90	66	76	63	82	60	75.4736	72.7709	78.3514	72.2679	89.2618	80.31	136.297	92.32	99.9107	96.6045	116.071	89.8335	91.6227	-0.426561	0.113547	-3.75668	0.000172	0.000318	Catechol siderophore ABC transporter%2C substrate-binding protein	NA	K02016	ABC.FEV.S; iron complex transport system substrate-binding protein	121	02000	Transporters [BR:ko02000],	09183	09180
D|1136176.5.peg.1877	1	2161329	2162951	+	1623	1417	1348	1360	1219.5	1521	1563	773	919	1044.5	834.5	930	901.5	954.876	943.223	959.981	898.924	1005.68	1020.52	1170.64	1285.49	1372.46	1278.86	1316.41	1349	1129.67	-0.426751	0.0492423	-8.66636	4.46e-18	2.11e-17	Peptide transport periplasmic protein SapA	NA	K19226	sapA; cationic peptide transport system substrate-binding protein	261	02010 01503 02000	ABC transporters [PATH:ko02010], Cationic antimicrobial peptide (CAMP) resistance [PATH:ko01503], Transporters [BR:ko02000],	09131 09175 09183	09130 09160 09180
D|1136176.5.peg.1504	1	1754358	1755089	-	732	64	57.5	59	47.5	56.5	57.5	33	34	46	23.5	57.5	28	43.1278	39.8841	41.6462	34.6591	37.0271	37.2168	49.9757	47.5588	60.4723	35.2683	80.6835	41.9223	45.7868	-0.442812	0.164133	-2.69789	0.00697814	0.0105823	Arginine ABC transporter%2C periplasmic arginine-binding protein ArtI	NA	K09997	artI; arginine transport system substrate-binding protein	161	02010 02000	ABC transporters [PATH:ko02010], Transporters [BR:ko02000],	09131 09183	09130 09180
D|1136176.5.peg.20	1	22800	24257	+	1458	272.5	289	262.5	249	286	299	195.5	219.5	208	115	175	165	183.293	202.219	184.937	183.619	189.103	195.225	295.311	306.334	273.44	176.342	247.712	247.042	223.715	-0.4435	0.10541	-4.20737	2.58e-05	5.17e-05	Potassium uptake protein TrkH	NA	K03498	trkH, trkG, ktrB; trk system potassium uptake protein	362	02000	Transporters [BR:ko02000],	09183	09180
D|1136176.5.peg.1434	1	1686278	1686997	+	720	924.5	885.5	923	883.5	986.5	1017.5	542.5	663	642	560	628	614	622.657	619.253	651.516	651.148	651.941	664.027	820.813	927.396	843.982	858.707	888.934	919.297	759.973	-0.446061	0.0453349	-9.83924	7.63e-23	4.47e-22	ABC-type tungstate transport system%2C ATP-binding protein	NA	K06857	tupC, vupC; tungstate transport system ATP-binding protein [EC:7.3.2.6]	111	02010 02000	ABC transporters [PATH:ko02010], Transporters [BR:ko02000],	09131 09183	09130 09180
D|1136176.5.peg.3595	2	724802	725683	+	882	90	78	75	91	101	85	40	56	74	61	64	49	60.6484	54.5782	52.9401	67.1059	66.781	55.4988	60.5766	78.3321	97.2815	93.5377	90.592	73.3641	70.9364	-0.470054	0.126175	-3.7254	0.000195	0.000358	Arginine/ornithine antiporter ArcD	NA	K24180	mleP; malate permease and related proteins	144	02000	Transporters [BR:ko02000],	09183	09180
D|1136176.5.peg.1721	1	1986830	1987633	+	804	212	192	181	186	190	209	132	145	129	109	140	125	142.861	134.346	127.762	137.161	125.628	136.462	199.903	202.824	169.585	167.141	198.17	187.153	160.75	-0.483732	0.0819287	-5.90431	3.54e-09	9.76e-09	Methionine ABC transporter substrate-binding protein	NA	K02073	metQ; D-methionine transport system substrate-binding protein	134	02010 02000	ABC transporters [PATH:ko02010], Transporters [BR:ko02000],	09131 09183	09130 09180
D|1136176.5.peg.1049	1	1192666	1193697	+	1032	2890	2800	2714	2647	3001	2999	1760	1863	2133	1768	1986	1862.5	1947.49	1959.22	1915.73	1951.97	1984.26	1958.13	2665.37	2605.94	2804.07	2711.06	2811.18	2787.83	2341.85	-0.483989	0.0291188	-16.6212	4.9e-62	1.01e-60	Putative potassium channel protein	NA	K10716	kch, trkA, mthK, pch; voltage-gated potassium channel	174	02000	Transporters [BR:ko02000],	09183	09180
D|1136176.5.peg.3966	2	1134940	1136088	-	1149	18	26	22	22	25.5	20.5	14	13	22	9	9.5	22.5	12.1297	18.1927	15.5291	16.2234	16.53	13.0585	21.2018	18.1842	28.9215	13.8006	12.7395	32.939	18.2875	-0.486246	0.231969	-2.09617	0.0360672	0.0493875	Tetrathionate reductase subunit C	NA	K08359	ttrC; tetrathionate reductase subunit C	127	00920 02020 02000	Sulfur metabolism [PATH:ko00920], Two-component system [PATH:ko02020], Transporters [BR:ko02000],	09102 09132 09183	09100 09130 09180
D|1136176.5.peg.3178	2	275193	276518	+	1326	76	84	78	88	99	79	61	60	44.5	63	62	48	51.2142	58.7765	55.0577	64.8936	65.4586	51.5812	92.3793	83.9272	57.843	96.6045	87.761	71.8668	69.7803	-0.494472	0.13039	-3.79226	0.000149	0.000277	Cytosine/purine/uracil/thiamine/allantoin permease family protein	NA	K10974	codB; cytosine permease	174	02000	Transporters [BR:ko02000],	09183	09180
D|1136176.5.peg.805	1	900144	901028	+	885	469	499	502	469	476	548	360	350	340	221	296	426	316.046	349.161	354.346	345.853	314.73	357.804	545.189	489.576	446.969	338.882	418.988	637.818	409.614	-0.497484	0.122917	-4.04731	5.18e-05	0.000101	Zinc ABC transporter%2C periplasmic-binding protein ZnuA	NA	K09815	znuA; zinc transport system substrate-binding protein	153	02010 02000	ABC transporters [PATH:ko02010], Transporters [BR:ko02000],	09131 09183	09130 09180
D|1136176.5.peg.2969	2	13101	14354	+	1254	10695	10968.5	11667	10321	12305.5	11411	7696	8408	8312	5992.5	7985.5	7326	7207.05	7674.54	8235.36	7610.99	8136.04	7450.55	11654.9	11761	10927.1	9188.16	11302.8	10968.7	9343.1	-0.506739	0.0629234	-8.05326	8.06e-16	3.36e-15	Long-chain fatty acid transport protein	NA	K06076	fadL; long-chain fatty acid transport protein	195	02000	Transporters [BR:ko02000],	09183	09180
D|1136176.5.peg.709	1	798746	799822	+	1077	1514.5	1464	1437.5	1361	1454	1498	1053	1040.5	1029	889	998.5	933	1020.24	1024.39	1014.33	1003.64	961.382	978.085	1594.68	1454.74	1352.74	1363.2	1412.67	1396.91	1214.75	-0.514353	0.045606	-11.2782	1.68e-29	1.27e-28	Putative permease PerM ( YfgO)	NA	K03548	perM; putative permease	283	02000	Transporters [BR:ko02000],	09183	09180
D|1136176.5.peg.3140	2	229545	230537	+	993	3056	2966.5	3061.5	2914	3221	3325.5	2033	2148	2453.5	1911	2236.5	1896	2059.35	2075.37	2160.66	2148.86	2129.72	2170.98	3078.81	3004.6	3224.75	2930.34	3165.06	2838.74	2582.27	-0.51792	0.0373233	-13.8766	8.78e-44	1.1e-42	Ribose ABC transport system%2C permease protein RbsC (TC 3.A.1.2.1)	NA	K10440	rbsC; ribose transport system permease protein	350	02010 02000	ABC transporters [PATH:ko02010], Transporters [BR:ko02000],	09131 09183	09130 09180
D|1136176.5.peg.3692	2	838047	839936	-	1890	224449	211548	220788	212696	238191	233904	176823	158780	150381	169573	137786	132865	151250	148025	155847	156848	157491	152722	267783	222099	197693	260024	195036	198929	188646	-0.540788	0.0856747	-6.31211	2.75e-10	8.06e-10	PTS system%2C mannitol-specific IIC component (EC 2.7.1.69) / PTS system%2C mannitol-specific IIB component (EC 2.7.1.69) / PTS system%2C mannitol-specific IIA component	KEGG_ENZYME:2.7.1.69,KEGG_ENZYME:2.7.1.69	K02800	mtlA, cmtA; mannitol PTS system EIICBA or EIICB component [EC:2.7.1.197]	540	00051 02060 02000	Fructose and mannose metabolism [PATH:ko00051], Phosphotransferase system (PTS) [PATH:ko02060], Transporters [BR:ko02000],	09101 09131 09183	09100 09130 09180
D|1136176.5.peg.3505	2	623055	623882	-	828	751	640.5	567	592	552.5	640.5	356.5	420.5	555.5	360	463.5	467	506.077	447.821	400.227	436.557	364.981	417.873	539.132	587.491	729.611	552.026	655.376	699.204	528.031	-0.549105	0.0977234	-5.61897	1.92e-08	5.03e-08	Phosphonate ABC transporter permease protein phnE2 (TC 3.A.1.9.1)	NA	K02042	phnE; phosphonate transport system permease protein	159	02010 02000	ABC transporters [PATH:ko02010], Transporters [BR:ko02000],	09131 09183	09130 09180
D|1136176.5.peg.390	1	437761	438627	+	867	1339	1321	1290	1130	1407	1318	824	784	1077	830	902	1027	902.314	924.331	910.57	833.293	930.306	860.558	1247.88	1096.65	1415.84	1272.73	1276.78	1537.65	1100.74	-0.549527	0.0740382	-7.42221	1.15e-13	4.16e-13	Protein involved in stability of MscS mechanosensitive channel	NA	K03442	mscS; small conductance mechanosensitive channel	228	02000	Transporters [BR:ko02000],	09183	09180
D|1136176.5.peg.4104	2	1306103	1306918	-	816	6	6.5	7	5	7.5	6.5	2	1	2	6	6.5	9	4.04323	4.19832	4.94108	3.68714	4.62839	3.91756	3.02883	1.39879	2.62923	9.20043	8.493	13.475	5.30342	-0.565451	0.418056	-1.35257	0.176192	0.214555	Ferric siderophore transport system%2C periplasmic binding protein TonB	NA	K03832	tonB; periplasmic protein TonB	18	02000	Transporters [BR:ko02000],	09183	09180
D|1136176.5.peg.3464	2	576469	577311	+	843	127.5	120.5	102	100	138.5	103.5	96.5	95.5	83.5	72.5	64.5	77	85.5817	83.9665	71.9986	73.7427	91.2454	67.2515	145.384	132.885	109.113	110.405	90.592	115.286	98.1209	-0.568175	0.120886	-4.70008	2.6e-06	5.69e-06	Glycerol-3-phosphate ABC transporter%2C permease protein UgpE (TC 3.A.1.1.3)	NA	K05815	ugpE; sn-glycerol 3-phosphate transport system permease protein	251	02010 02000	ABC transporters [PATH:ko02010], Transporters [BR:ko02000],	09131 09183	09130 09180
D|1136176.5.peg.1823	1	2111256	2112473	-	1218	196	216	146	139	196	198	122	134.5	142	118	149	115	132.079	151.14	103.057	102.502	129.595	129.28	184.759	187.438	186.675	180.942	210.909	172.181	155.88	-0.586034	0.104874	-5.588	2.3e-08	5.97e-08	MFS family multidrug transport protein%2C bicyclomycin resistance protein	NA	K07552	bcr, tcaB; MFS transporter, DHA1 family, multidrug resistance protein	219	02000	Transporters [BR:ko02000],	09183	09180
D|1136176.5.peg.324	1	364242	364703	-	462	4857.5	4598	4382	4310	5087.5	4967	3417.5	3667	3650	3127	3347	3195	3272.99	3217.32	3093.11	3178.31	3363.52	3243.09	5174.76	5129.35	4798.34	4794.96	4737.68	4783.64	4065.59	-0.602838	0.0347229	-17.3614	1.62e-67	3.97e-66	PTS system nitrogen-specific IIA component%2C PtsN	NA	K02806	ptsN; nitrogen PTS system EIIA component [EC:2.7.1.-]	121	02060 02000	Phosphotransferase system (PTS) [PATH:ko02060], Transporters [BR:ko02000],	09131 09183	09130 09180
D|1136176.5.peg.804	1	899278	900060	-	783	1072.5	1039	1071.5	1034.5	1107	1160.5	768	906	838	685	775.5	727	722.39	727.01	755.985	762.5	731.946	757.395	1163.07	1267.3	1101.65	1050.38	1097.01	1088.48	935.427	-0.603133	0.0492582	-12.2443	1.8e-34	1.64e-33	Zinc ABC transporter%2C ATP-binding protein ZnuC	NA	K09817	znuC; zinc transport system ATP-binding protein [EC:7.2.2.20]	142	02010 02000	ABC transporters [PATH:ko02010], Transporters [BR:ko02000],	09131 09183	09130 09180
D|1136176.5.peg.2437	1	2784750	2786999	-	2250	1937.5	1962.5	1922	1863	2003.5	2034.5	1442.5	1572.5	1621	1117	1488	1277	1305.29	1372.85	1356.68	1373.83	1324.38	1328.05	2183.79	2198.89	2130.99	1712.81	2106.26	1911.96	1692.15	-0.603706	0.0606867	-9.94791	2.58e-23	1.53e-22	Phosphoenolpyruvate-protein phosphotransferase%2C nitrogen regulation associated	NA	K08484	ptsP; phosphotransferase system, enzyme I, PtsP [EC:2.7.3.9]	421	02060 02000	Phosphotransferase system (PTS) [PATH:ko02060], Transporters [BR:ko02000],	09131 09183	09130 09180
D|1136176.5.peg.1819	1	2106767	2107438	-	672	154.5	146	145.5	147.5	157	161	101	109.5	112	104	123	114.5	103.776	102.159	102.351	108.402	103.808	105.121	152.956	152.468	147.237	159.474	174.106	170.684	131.879	-0.612039	0.086107	-7.10788	1.18e-12	4.01e-12	AttE component of AttEFGH ABC transport system	NA	K02003	ABC.CD.A; putative ABC transport system ATP-binding protein	134	02000	Transporters [BR:ko02000],	09183	09180
D|1136176.5.peg.2053	1	2339390	2340151	+	762	555	542	488	470	545	547	275	437	424	316	444	410	373.999	379.249	344.464	346.591	360.353	357.151	416.464	611.27	557.396	484.556	628.482	613.862	456.153	-0.616434	0.0935906	-6.58649	4.5e-11	1.39e-10	Lysine-arginine-ornithine-binding periplasmic protein precursor (TC 3.A.1.3.1)	NA	K10022	aotJ; arginine/ornithine transport system substrate-binding protein	124	02010 02000	ABC transporters [PATH:ko02010], Transporters [BR:ko02000],	09131 09183	09130 09180
D|1136176.5.peg.2670	1	3082278	3083693	+	1416	189	191	194	192	217	217	88	184	171	71	217	163	127.362	133.647	136.938	141.586	143.48	141.685	133.269	257.377	224.799	108.872	307.163	244.048	175.019	-0.630913	0.20007	-3.15346	0.00161346	0.0026456	Transporter%2C putative	NA	K14445	SLC13A2_3_5; solute carrier family 13 (sodium-dependent dicarboxylate transporter), member 2/3/5	282	02000	Transporters [BR:ko02000],	09183	09180
D|1136176.5.peg.1303	1	1515597	1517117	-	1521	752	701.5	655	1212.5	691	739.5	728	655	688	677	259.5	522	506.751	490.504	462.344	893.762	456.888	482.513	1102.49	916.206	904.455	1038.11	366.614	781.552	700.183	-0.633926	0.23419	-2.70689	0.00679173	0.0103131	Tricarboxylate transport membrane protein TctA	NA	K07793	tctA; putative tricarboxylic transport membrane protein	508	02020 02000	Two-component system [PATH:ko02020], Transporters [BR:ko02000],	09132 09183	09130 09180
D|1136176.5.peg.3540	2	664865	665305	+	441	13.5	17.5	12	14.5	9.5	9.5	7	10	10	11	6	11	8.76033	11.8953	8.47042	10.324	5.95078	5.87634	10.6009	13.9879	13.1461	16.8674	8.493	16.4695	10.9035	-0.638708	0.285811	-2.23472	0.0254355	0.0357036	Phosphotransferase system mannitol/fructose-specific IIA domain	NA	K02768	fruB; fructose PTS system EIIA component [EC:2.7.1.202]	11	00051 02060 02000	Fructose and mannose metabolism [PATH:ko00051], Phosphotransferase system (PTS) [PATH:ko02060], Transporters [BR:ko02000],	09101 09131 09183	09100 09130 09180
D|1136176.5.peg.1131	1	1283963	1285885	+	1923	2058.5	1877	1896	1845.5	2057.5	2009.5	1206.5	1554	1914.5	940.5	1852.5	1415	1386.83	1313.38	1338.33	1360.55	1360.08	1311.73	1826.38	2173.72	2516.17	1441.4	2621.51	2118.57	1730.72	-0.654157	0.120351	-5.43543	5.47e-08	1.38e-07	Cytochrome c-type heme lyase subunit nrfE%2C nitrite reductase complex assembly	NA	K02198	ccmF; cytochrome c-type biogenesis protein CcmF	201	02000	Transporters [BR:ko02000],	09183	09180
D|1136176.5.peg.3463	2	575501	576382	+	882	21	26	20	22	23	39	22	26	18	21	7	19	14.1513	18.1927	14.1174	16.2234	15.2076	25.4642	33.3171	36.3685	23.6631	32.2015	9.9085	28.4473	22.2719	-0.656882	0.240389	-2.73258	0.00628407	0.00960509	Glycerol-3-phosphate ABC transporter%2C permease protein UgpA (TC 3.A.1.1.3)	NA	K05814	ugpA; sn-glycerol 3-phosphate transport system permease protein	208	02010 02000	ABC transporters [PATH:ko02010], Transporters [BR:ko02000],	09131 09183	09130 09180
D|1136176.5.peg.1332	1	1579701	1580906	-	1206	5096.5	5045	5049.5	4666	5338	5472	3367	4146	4634	3237	3991.5	3909.5	3434.05	3530.09	3563.93	3440.84	3529.48	3572.82	5099.04	5799.37	6091.92	4963.63	5649.26	5852.65	4543.92	-0.667261	0.0526874	-12.6645	9.3e-37	9.26e-36	Glutamate Aspartate transport system permease protein GltJ (TC 3.A.1.3.4)	NA	K09970	aapQ, bztB; general L-amino acid transport system permease protein	252	02010 02000	ABC transporters [PATH:ko02010], Transporters [BR:ko02000],	09131 09183	09130 09180
D|1136176.5.peg.921	1	1039396	1041027	+	1632	3413	3562	3394	3027	3617	3608	2393	2692	2965	2003	2984	2617	2299.92	2492.4	2395.72	2232.19	2391.55	2355.76	3624	3765.54	3897.83	3071.41	4223.85	3918.24	3055.7	-0.667601	0.06838	-9.7631	1.62e-22	9.41e-22	Oligopeptide ABC transporter%2C periplasmic oligopeptide-binding protein OppA (TC 3.A.1.5.1)	NA	K15580	oppA, mppA; oligopeptide transport system substrate-binding protein	487	02010 02024 01501 02000	ABC transporters [PATH:ko02010], Quorum sensing [PATH:ko02024], beta-Lactam resistance [PATH:ko01501], Transporters [BR:ko02000],	09131 09145 09175 09183	09130 09140 09160 09180
D|1136176.5.peg.3845	2	1008303	1009160	+	858	191.5	165.5	148	148	165	149	139.5	127	121	117	98.5	131.5	128.709	115.454	104.468	109.139	109.098	97.2861	210.504	177.646	159.068	179.408	138.719	196.137	143.803	-0.673495	0.105516	-6.38286	1.74e-10	5.16e-10	L-proline glycine betaine ABC transport system permease protein ProW (TC 3.A.1.12.1)	NA	K02001	proW; glycine betaine/proline transport system permease protein	261	02010 02000	ABC transporters [PATH:ko02010], Transporters [BR:ko02000],	09131 09183	09130 09180
D|1136176.5.peg.3923	2	1087791	1088846	-	1056	105	127	116	98	122	125	83	107	72	87	87	90	70.7565	88.8645	81.8807	72.2679	80.6662	81.6159	125.696	149.67	94.6522	133.406	123.148	134.75	103.115	-0.673511	0.110139	-6.11513	9.65e-10	2.73e-09	Arsenical-resistance protein ACR3	NA	K03325	ACR3, arsB; arsenite transporter	332	02000	Transporters [BR:ko02000],	09183	09180
D|1136176.5.peg.470	1	528441	529358	+	918	297.5	284	261.5	257	277	302.5	207	193	252.5	192	222	212	200.14	198.721	184.232	189.519	183.152	197.184	313.484	269.966	331.283	294.414	314.241	317.412	249.479	-0.675427	0.0687572	-9.82336	8.93e-23	5.21e-22	ABC-type multidrug transport system%2C ATPase component	NA	K01990	ABC-2.A; ABC-2 type transport system ATP-binding protein	227	02000	Transporters [BR:ko02000],	09183	09180
D|1136176.5.peg.1619	1	1889459	1890433	-	975	226	206	216	176	225	209	147	193	162	113	183	161	152.295	144.142	152.468	129.787	148.77	136.462	222.619	269.966	212.968	173.275	259.036	241.053	186.903	-0.675735	0.0982473	-6.8779	6.07e-12	1.98e-11	Ribose/xylose/arabinose/galactoside ABC-type transport systems%2C periplasmic sugar binding protein	NA	K02058	ABC.SS.S; simple sugar transport system substrate-binding protein	216	02000	Transporters [BR:ko02000],	09183	09180
D|1136176.5.peg.3506	2	623870	624640	-	771	708	573.5	541.5	518.5	548.5	642.5	318.5	448	596.5	365.5	449.5	527.5	477.101	400.94	381.875	381.987	362.337	419.179	481.584	626.657	783.51	559.693	635.559	789.038	524.955	-0.678182	0.119457	-5.67719	1.37e-08	3.61e-08	Phosphonate ABC transporter ATP-binding protein (TC 3.A.1.9.1)	NA	K02041	phnC; phosphonate transport system ATP-binding protein [EC:7.3.2.2]	187	02010 02000	ABC transporters [PATH:ko02010], Transporters [BR:ko02000],	09131 09183	09130 09180
D|1136176.5.peg.1843	1	2128264	2129271	-	1008	1394.5	1304.5	1280.5	1287.5	1485	1360.5	938	1128	1214.5	692.5	1160	1106.5	939.377	912.436	903.511	949.069	981.879	887.981	1420.52	1577.83	1595.94	1061.12	1641.98	1655.93	1210.63	-0.684105	0.0958822	-7.13485	9.69e-13	3.32e-12	L-proline glycine betaine binding ABC transporter protein ProX (TC 3.A.1.12.1)	NA	K02002	proX; glycine betaine/proline transport system substrate-binding protein	232	02010 02000	ABC transporters [PATH:ko02010], Transporters [BR:ko02000],	09131 09183	09130 09180
D|1136176.5.peg.1815	1	2100867	2101478	+	612	13054	12311	12614.5	12114.5	13739	13709.5	8921	10584	11403	8554	10567.5	10277.5	8796.72	8614.26	8903.82	8933.2	9084.2	8950.98	13510.1	14804.8	14990.5	13116.7	14957.6	15387	11670.8	-0.703552	0.0438442	-16.0466	6.04e-58	1.15e-56	Dfam020323	NA	K03286	TC.OOP; OmpA-OmpF porin, OOP family	28	02000	Transporters [BR:ko02000],	09183	09180
D|1136176.5.peg.3431	2	541108	541557	+	450	1023	984	970	850.5	1013	996	726	779.5	944.5	543	796.5	767.5	689.37	688.525	684.692	626.813	669.794	650.315	1099.47	1089.66	1241	832.639	1126.74	1148.37	878.948	-0.706169	0.0807507	-8.74504	2.23e-18	1.07e-17	Ascorbate-specific PTS system%2C EIIA component (EC 2.7.1.-)	KEGG_ENZYME:2.7.1.-	K02821	ulaC, sgaA; ascorbate PTS system EIIA or EIIAB component [EC:2.7.1.194]	61	00053 02060 02000	Ascorbate and aldarate metabolism [PATH:ko00053], Phosphotransferase system (PTS) [PATH:ko02060], Transporters [BR:ko02000],	09101 09131 09183	09100 09130 09180
D|1136176.5.peg.3134	2	223296	225191	-	1896	2375.5	2107.5	2161.5	2066.5	2310	2362	1601	1837.5	2069.5	1473.5	1971.5	1665.5	1600.44	1474.31	1525.38	1523.53	1527.37	1542.21	2424.58	2569.57	2719.94	2258.7	2789.95	2492.88	2037.41	-0.731257	0.0524165	-13.9509	3.11e-44	3.97e-43	ABC transporter%2C periplasmic substrate-binding protein	NA	K13893	yejA; microcin C transport system substrate-binding protein	408	02010 02000	ABC transporters [PATH:ko02010], Transporters [BR:ko02000],	09131 09183	09130 09180
D|1136176.5.peg.3724	2	866921	868129	+	1209	32	49	36	37	38	37	16	40	43	31	21	33	21.5639	34.2863	25.4113	27.2848	25.1255	24.1583	24.2306	55.9515	56.5284	47.5355	29.7255	49.4084	35.1008	-0.746402	0.194796	-3.8317	0.000127	0.000238	MFS transporter	NA	K19577	ydhP; MFS transporter, DHA1 family, inner membrane transport protein	208	02000	Transporters [BR:ko02000],	09183	09180
D|1136176.5.peg.3440	2	552381	553235	+	855	424	436.5	439.5	397	428.5	444	345	310.5	375.5	401	324	308.5	285.721	305.078	309.876	292.759	282.993	289.9	522.473	433.624	492.98	614.895	458.622	461.145	395.839	-0.755142	0.0800065	-9.43851	3.78e-21	2.08e-20	ABC transporter ATP-binding protein	NA	K01990	ABC-2.A; ABC-2 type transport system ATP-binding protein	126	02000	Transporters [BR:ko02000],	09183	09180
D|1136176.5.peg.3844	2	1007269	1008246	+	978	546	484	509	521	567	512	483	412	435	378	405	428	367.934	338.665	359.287	384.2	374.899	334.299	731.463	576.3	571.857	579.627	573.277	640.813	486.052	-0.765625	0.0722717	-10.5937	3.19e-26	2.13e-25	L-proline glycine betaine binding ABC transporter protein ProX (TC 3.A.1.12.1)	NA	K02002	proX; glycine betaine/proline transport system substrate-binding protein	195	02010 02000	ABC transporters [PATH:ko02010], Transporters [BR:ko02000],	09131 09183	09130 09180
D|1136176.5.peg.3133	2	222197	223285	-	1089	751.5	747.5	711.5	660.5	743	786	493	597.5	683.5	518.5	680.5	610.5	506.077	522.691	501.872	486.702	491.27	513.201	746.607	835.076	897.882	794.304	962.54	913.308	680.961	-0.76996	0.0624035	-12.3384	5.63e-35	5.2e-34	Oligopeptide transport system permease protein OppB (TC 3.A.1.5.1)	NA	K13894	yejB; microcin C transport system permease protein	261	02010 02000	ABC transporters [PATH:ko02010], Transporters [BR:ko02000],	09131 09183	09130 09180
D|1136176.5.peg.586	1	670905	672131	+	1227	22271	21728	22076	20636	23031	24063	18314	18677	20263	16926	18704	19277	15007.8	15203.5	15582.7	15217.6	15228.1	15711.4	27735	26125.2	26638	25954.4	26475.5	28862	21145.1	-0.815142	0.0314482	-25.9202	3.95e-148	4.16e-146	N-Acetyl-D-glucosamine ABC transport system%2C sugar-binding protein	NA	K02027	ABC.MS.S; multiple sugar transport system substrate-binding protein	254	02000	Transporters [BR:ko02000],	09183	09180
D|1136176.5.peg.3139	2	228043	229548	+	1506	3811	3716.5	3822.5	3550	4008	4028.5	3279	3399	3362.5	3086	3426.5	3019	2568.12	2600.16	2697.83	2617.87	2650.08	2629.99	4965.77	4754.48	4419.73	4732.09	4849.5	4520.12	3667.15	-0.840931	0.0339957	-24.7364	4.35e-135	3.88e-133	Ribose ABC transport system%2C ATP-binding protein RbsA (TC 3.A.1.2.1)	NA	K10441	rbsA; ribose transport system ATP-binding protein [EC:7.5.2.7]	388	02010 02000	ABC transporters [PATH:ko02010], Transporters [BR:ko02000],	09131 09183	09130 09180
D|1136176.5.peg.321	1	361590	362945	-	1356	1054	1083	1044	962	1095	1083	845	920	973	806	905	991	710.26	757.797	736.926	709.405	724.012	707.12	1279.68	1286.88	1279.12	1235.92	1281.03	1483.75	1015.99	-0.852337	0.0491847	-17.3293	2.83e-67	6.84e-66	Magnesium transporter	NA	K06213	mgtE; magnesium transporter	306	02000	Transporters [BR:ko02000],	09183	09180
D|1136176.5.peg.3429	2	539575	539844	+	270	1442	1440	1319.5	1223	1451.5	1403.5	1290.5	1187	1123.5	1091	1273	1183	971.722	1007.6	931.04	901.874	959.399	916.057	1953.6	1660.36	1476.31	1672.94	1801.93	1771.22	1335.34	-0.86111	0.0640432	-13.4458	3.26e-41	3.76e-40	Ascorbate-specific PTS system%2C EIIB component (EC 2.7.1.69)	KEGG_ENZYME:2.7.1.69	K02822	ulaB, sgaB; ascorbate PTS system EIIB component [EC:2.7.1.194]	39	00053 02060 02000	Ascorbate and aldarate metabolism [PATH:ko00053], Phosphotransferase system (PTS) [PATH:ko02060], Transporters [BR:ko02000],	09101 09131 09183	09100 09130 09180
D|1136176.5.peg.3141	2	230659	231537	+	879	6275	6293	6182	5862	6345	6547	5500	5193	5949	5321	5478	5563	4228.54	4403.34	4363.68	4322.8	4195.3	4274.71	8329.28	7263.9	7820.64	8159.25	7754.11	8329.07	6120.39	-0.885781	0.0382544	-23.155	1.29e-118	8.97e-117	Ribose ABC transport system%2C periplasmic ribose-binding protein RbsB (TC 3.A.1.2.1)	NA	K10439	rbsB; ribose transport system substrate-binding protein	232	02010 02030 02000	ABC transporters [PATH:ko02010], Bacterial chemotaxis [PATH:ko02030], Transporters [BR:ko02000],	09131 09142 09183	09130 09140 09180
D|1136176.5.peg.3430	2	539855	541111	+	1257	3607	3717	3276.5	3011.5	3568.5	3594.5	2989.5	3017.5	3537	2493	3375.5	2980.5	2430.65	2600.86	2312.42	2220.39	2359.16	2346.62	4526.59	4220.14	4649.79	3822.78	4777.31	4461.73	3394.04	-0.890859	0.059819	-14.8926	3.68e-50	5.57e-49	D00732228: membrane protein	NA	K03475	ulaA, sgaT; ascorbate PTS system EIIC component	300	00053 02060 02000	Ascorbate and aldarate metabolism [PATH:ko00053], Phosphotransferase system (PTS) [PATH:ko02060], Transporters [BR:ko02000],	09101 09131 09183	09100 09130 09180
D|1136176.5.peg.583	1	667568	668650	-	1083	4549	4527	4522	4180	4880	4905	3961	4198	4679	3594	4379	4051	3065.44	3167.64	3191.94	3082.45	3226.65	3202.61	5998.6	5872.11	6151.08	5511.06	6198.47	6065.26	4561.11	-0.9188	0.0341041	-26.941	7.26e-160	9.11e-158	Maltose/maltodextrin transport ATP-binding protein MalK (EC 3.6.3.19)	KEGG_ENZYME:3.6.3.19	K10111	malK, mtlK, thuK; multiple sugar transport system ATP-binding protein [EC:3.6.3.-]	185	02010 02000	ABC transporters [PATH:ko02010], Transporters [BR:ko02000],	09131 09183	09130 09180
D|1136176.5.peg.3167	2	261374	262507	+	1134	1675	1576	1683.5	1512	1738	1730.5	1644.5	1568	1496	1581.5	1415	1311	1128.73	1102.76	1187.98	1114.99	1149.16	1129.56	2489.7	2193.3	1966.66	2424.31	2002.93	1962.86	1654.41	-0.936012	0.0679466	-13.7757	3.57e-43	4.41e-42	Fructose-specific phosphocarrier protein HPr (EC 2.7.1.69) / PTS system%2C fructose-specific IIA component (EC 2.7.1.69)	KEGG_ENZYME:2.7.1.69,KEGG_ENZYME:2.7.1.69	K11183	fruB, fpr; multiphosphoryl transfer protein [EC:2.7.1.202]	196	02060 02000	Phosphotransferase system (PTS) [PATH:ko02060], Transporters [BR:ko02000],	09131 09183	09130 09180
D|1136176.5.peg.1910	1	2194404	2195996	-	1593	1520	1561	1340	1278	1454	1478	1355	1202	1449	1299	1238	1349	1024.28	1092.26	945.863	942.432	961.382	965.026	2052.03	1681.34	1904.88	1991.89	1752.39	2019.76	1444.46	-0.94243	0.0626858	-15.0342	4.38e-51	6.94e-50	Na+/H+ antiporter	NA	K18218	tet35; tetracycline resistance efflux pump	441	02000 01504	Transporters [BR:ko02000], Antimicrobial resistance genes [BR:ko01504],	09183	09180
D|1136176.5.peg.985	1	1117339	1118109	+	771	2089	2159	1968	1856	2131	2196	1828	2092	2318	1374	2039	1921	1407.72	1510.7	1389.15	1368.67	1409.01	1433.83	2768.35	2926.26	3047.28	2106.9	2886.2	2876.17	2094.19	-0.963703	0.0794112	-12.1356	6.84e-34	6.03e-33	Lysine-arginine-ornithine-binding periplasmic protein precursor (TC 3.A.1.3.1)	NA	K10022	aotJ; arginine/ornithine transport system substrate-binding protein	179	02010 02000	ABC transporters [PATH:ko02010], Transporters [BR:ko02000],	09131 09183	09130 09180
D|1136176.5.peg.2995	2	47797	49248	+	1452	2221	1917	1902	1802	2195	2239	1980	1863	1723	2743	1668	1357	1496.67	1341.36	1342.56	1328.84	1451.33	1461.9	2998.54	2605.94	2265.08	4206.13	2361.05	2031.74	2074.26	-0.967128	0.148365	-6.51856	7.1e-11	2.16e-10	Formate efflux transporter (TC 2.A.44 family)	NA	K06212	focA; formate transporter	182	02000	Transporters [BR:ko02000],	09183	09180
D|1136176.5.peg.584	1	668947	669867	+	921	7384	7591.5	7412	6979.5	7765.5	8245	7033	7016	7912	6633.5	7385	6389	4975.87	5311.58	5231.89	5146.51	5134.2	5383.38	10650.9	9813.89	10401.2	10171.1	10453.5	9565.77	7686.65	-0.969376	0.0347261	-27.9149	1.76e-171	2.91e-169	ABC transporter%2C permease protein	NA	K02025	ABC.MS.P; multiple sugar transport system permease protein	237	02000	Transporters [BR:ko02000],	09183	09180
D|1136176.5.peg.1503	1	1753670	1754356	-	687	49	39.5	31.5	31.5	36.5	43	25.5	45	52	30.5	37	28	33.0197	27.2891	21.8819	22.8602	23.8031	28.0759	37.8604	62.9454	68.3599	46.0021	52.3735	41.9223	38.8661	-0.986883	0.170798	-5.77808	7.56e-09	2.03e-08	Arginine ABC transporter%2C permease protein ArtQ	NA	K09999	artQ; arginine transport system permease protein	168	02010 02000	ABC transporters [PATH:ko02010], Transporters [BR:ko02000],	09131 09183	09130 09180
D|1136176.5.peg.1814	1	2099560	2100867	+	1308	22891	21771	22313.5	20339.5	23506	23424.5	21174	22898	23675	20596	21218.5	21701.5	15425.6	15233.6	15750	14998.5	15542.1	15294.2	32066.2	32029.4	31123.5	31582	30034.1	32491.3	23464.2	-1.03728	0.0247255	-41.9521	0	0	Agglutination protein	NA	K12543	lapE; outer membrane protein, adhesin transport system	255	02000 02044	Transporters [BR:ko02000], Secretion system [BR:ko02044],	09183	09180
D|1136176.5.peg.3504	2	622252	623055	-	804	582	485	448.5	431.5	445	500	380	505.5	598	378.5	514	509.5	392.193	339.365	316.229	317.831	294.233	326.464	575.478	706.388	786.139	579.627	727.567	762.088	510.3	-1.05956	0.0972448	-10.8958	1.21e-27	8.5e-27	Phosphonate ABC transporter permease protein phnE1 (TC 3.A.1.9.1)	NA	K02042	phnE; phosphonate transport system permease protein	264	02010 02000	ABC transporters [PATH:ko02010], Transporters [BR:ko02000],	09131 09183	09130 09180
D|1136176.5.peg.1333	1	1580978	1582006	-	1029	64032	61147	59430	55331	63864	64644	56109	62889	70263	53186	63013	63645	43149.3	42785.8	41949.7	40802.6	42226.8	42207.8	84972.3	87968.3	92368.7	81555.7	89194.9	95290.9	65372.7	-1.06984	0.0395894	-27.0234	7.84e-161	1.04e-158	Glutamate Aspartate periplasmic binding protein precursor GltI (TC 3.A.1.3.4)	NA	K09969	aapJ, bztA; general L-amino acid transport system substrate-binding protein	251	02010 02000	ABC transporters [PATH:ko02010], Transporters [BR:ko02000],	09131 09183	09130 09180
D|1136176.5.peg.2094	1	2386095	2387456	-	1362	3522.5	3555.5	3272	3142	3373	3577.5	1855	3533.5	5415	2197.5	5613	2399.5	2373.37	2487.51	2309.6	2317	2230.22	2335.52	2809.24	4941.92	7118.64	3368.89	7945.2	3591.84	3652.41	-1.08334	0.220066	-4.92279	8.53e-07	1.97e-06	TRAP-type C4-dicarboxylate transport system%2C large permease component	NA	K11690	dctM; C4-dicarboxylate transporter, DctM subunit	404	02020 02000	Two-component system [PATH:ko02020], Transporters [BR:ko02000],	09132 09183	09130 09180
D|1136176.5.peg.1454	1	1707276	1708175	+	900	7985.5	7479.5	8223.5	8155	8865	8435	8904.5	8764	8456	8274	7638	7827.5	5380.86	5233.21	5804.35	6013.72	5861.52	5507.44	13484.4	12259	11116.4	12687.4	10811.6	11718.8	8823.21	-1.09242	0.0614585	-17.7748	1.11e-70	2.92e-69	L-proline glycine betaine ABC transport system permease protein ProW (TC 3.A.1.12.1)	NA	K02001	proW; glycine betaine/proline transport system permease protein	299	02010 02000	ABC transporters [PATH:ko02010], Transporters [BR:ko02000],	09131 09183	09130 09180
D|1136176.5.peg.2318	1	2645616	2645975	+	360	393	386	376	341	395	422	389	419	447	376	379	375	264.831	270.092	265.406	251.463	261.173	275.535	589.108	586.092	587.633	576.56	536.474	561.46	418.819	-1.11306	0.0538298	-20.6775	5.53e-95	2.35e-93	Outer membrane lipoprotein SmpA%2C a component of the essential YaeT outer-membrane protein assembly complex	NA	K06186	bamE, smpA; outer membrane protein assembly factor BamE	51	02000	Transporters [BR:ko02000],	09183	09180
D|1136176.5.peg.1304	1	1517128	1517625	-	498	123	108.5	121	270.5	118	123.5	189	215	146	159	68.5	122	82.8862	75.5698	85.41	199.105	78.0214	80.31	286.224	300.739	191.934	243.811	96.254	182.662	158.577	-1.11478	0.329178	-3.38654	0.000708	0.00122096	Tricarboxylate transport protein TctB	NA	K07794	tctB; putative tricarboxylic transport membrane protein	63	02020 02000	Two-component system [PATH:ko02020], Transporters [BR:ko02000],	09132 09183	09130 09180
D|1136176.5.peg.984	1	1116438	1117208	+	771	1175	1279	1194	1122	1290	1317	1312	1281	1418	1059	1356	1266	791.799	894.943	842.807	827.394	852.946	859.905	1986.91	1791.85	1864.12	1623.88	1919.42	1895.49	1345.95	-1.12831	0.053264	-21.1833	1.36e-99	6.31e-98	Arginine/ornithine ABC transporter%2C ATP-binding protein AotP	NA	K10025	aotP; arginine/ornithine transport system ATP-binding protein [EC:7.4.2.1]	207	02010 02000	ABC transporters [PATH:ko02010], Transporters [BR:ko02000],	09131 09183	09130 09180
D|1136176.5.peg.3100	2	184866	185897	+	1032	4133.5	3937.5	4349	3965	4583	4562.5	4419.5	4753	4704	4343	4087.5	4315	2785.11	2754.8	3069.82	2923.9	3030.27	2978.65	6692.2	6648.44	6183.95	6659.58	5785.15	6460.53	4664.37	-1.1312	0.0473575	-23.8864	4.24e-126	3.34e-124	Predicted polyamine sensor NspS%2C involved in biofilm formation	NA	K11069	potD; spermidine/putrescine transport system substrate-binding protein	54	02010 02000	ABC transporters [PATH:ko02010], Transporters [BR:ko02000],	09131 09183	09130 09180
D|1136176.5.peg.3354	2	453597	454667	+	1071	13046	12360	12117	11010	13065	12979	12879	13560	14721	12274	12931	13016	8791.33	8648.55	8553	8119.08	8638.55	8474.34	19504.2	18967.6	19352.4	18821	18303.8	19487.9	13805.1	-1.15955	0.0272935	-42.4847	0	0	Outer membrane protein A precursor	NA	K03286	TC.OOP; OmpA-OmpF porin, OOP family	55	02000	Transporters [BR:ko02000],	09183	09180
D|1136176.5.peg.3507	2	624756	625796	-	1041	3437	2895	2671	2801	3017	3258	3036	3366	3933	2588	2999	3520	2316.1	2025.69	1885.37	2065.53	1994.84	2127.24	4597.76	4708.32	5170.38	3968.45	4245.08	5270.23	3364.58	-1.17139	0.0775437	-15.1061	1.48e-51	2.38e-50	Phosphonate ABC transporter phosphate-binding periplasmic component (TC 3.A.1.9.1)	NA	K02044	phnD; phosphonate transport system substrate-binding protein	213	02010 02000	ABC transporters [PATH:ko02010], Transporters [BR:ko02000],	09131 09183	09130 09180
D|1136176.5.peg.1455	1	1708168	1709412	+	1245	13203.5	12330.5	13810.5	13755	14721	13719	16399.5	16155	14697	14190	13485	12874.5	8897.12	8627.56	9748.04	10143.3	9733.5	8957.51	24834.9	22597.4	19320.9	21759	19088	19275.3	15248.5	-1.17715	0.0754876	-15.5939	8.01e-55	1.46e-53	L-proline glycine betaine ABC transport system permease protein ProV (TC 3.A.1.12.1)	NA	K02000	proV; glycine betaine/proline transport system ATP-binding protein [EC:7.6.2.9]	251	02010 02000	ABC transporters [PATH:ko02010], Transporters [BR:ko02000],	09131 09183	09130 09180
D|1136176.5.peg.1816	1	2101754	2102920	-	1167	8171	8041	7666	7461	7939	8224	9448	8348	9414	8922	7915	8795	5506.2	5626.45	5411.19	5501.95	5249.25	5369.67	14308.2	11677.1	12375.8	13681	11203.7	13168.1	9089.88	-1.22602	0.06041	-20.295	1.42e-91	5.51e-90	Na+/H+ antiporter NhaA type	NA	K03313	nhaA; Na+:H+ antiporter, NhaA family	314	02000	Transporters [BR:ko02000],	09183	09180
D|1136176.5.peg.2095	1	2387459	2388214	-	756	2350.5	2363.5	2200	2119	2271	2409.5	1226	2864.5	4454	1325.5	4827	1719.5	1583.6	1653.44	1552.91	1562.61	1501.58	1572.9	1856.67	4006.13	5855.29	2031.76	6832.62	2573.73	2715.27	-1.2966	0.319412	-4.05934	4.92e-05	9.57e-05	TRAP-type transport system%2C small permease component%2C predicted N-acetylneuraminate transporter	NA	K11689	dctQ; C4-dicarboxylate transporter, DctQ subunit	116	02020 02000	Two-component system [PATH:ko02020], Transporters [BR:ko02000],	09132 09183	09130 09180
D|1136176.5.peg.4280	2	1511126	1512328	+	1203	414	439	443	429	512.5	470.5	553.5	616.5	640	345.5	549	493.5	278.983	307.177	312.7	316.356	338.533	306.876	837.472	861.653	841.353	529.025	777.109	738.132	537.114	-1.30189	0.106337	-12.243	1.83e-34	1.66e-33	Long-chain fatty acid transport protein	NA	K06076	fadL; long-chain fatty acid transport protein	57	02000	Transporters [BR:ko02000],	09183	09180
D|1136176.5.peg.1844	1	2129264	2130367	-	1104	591.5	625.5	559.5	589	671	537	622.5	747	829.5	449.5	839	746	398.258	437.325	394.58	434.345	443.664	350.622	941.966	1044.89	1089.82	688.499	1187.6	1116.93	710.709	-1.30439	0.117389	-11.1118	1.1e-28	8.05e-28	L-proline glycine betaine ABC transport system permease protein ProW (TC 3.A.1.12.1)	NA	K02001	proW; glycine betaine/proline transport system permease protein	275	02010 02000	ABC transporters [PATH:ko02010], Transporters [BR:ko02000],	09131 09183	09130 09180
D|1136176.5.peg.1505	1	1755196	1755939	-	744	13	21	19	16	21	14	18	22	25	20	23	16	8.76033	14.6941	13.4115	11.7988	13.8852	9.14098	27.2595	30.7733	32.8654	30.6681	32.5565	23.9556	20.8141	-1.32047	0.212242	-6.22151	4.92e-10	1.42e-09	Arginine ABC transporter%2C ATP-binding protein ArtP	NA	K10000	artP; arginine transport system ATP-binding protein [EC:7.4.2.1]	164	02010 02000	ABC transporters [PATH:ko02010], Transporters [BR:ko02000],	09131 09183	09130 09180
D|1136176.5.peg.1845	1	2130371	2131558	-	1188	654	668	728	719.5	771	598.5	897.5	970	904	591	886	948.5	440.712	467.413	513.872	530.21	509.784	390.45	1358.43	1356.82	1188.41	906.242	1254.13	1419.37	861.321	-1.39194	0.110886	-12.5529	3.83e-36	3.71e-35	L-proline glycine betaine ABC transport system permease protein ProV (TC 3.A.1.12.1)	NA	K02000	proV; glycine betaine/proline transport system ATP-binding protein [EC:7.6.2.9]	263	02010 02000	ABC transporters [PATH:ko02010], Transporters [BR:ko02000],	09131 09183	09130 09180
D|1136176.5.peg.807	1	905289	905510	+	222	120	111	122	122	126.5	107.5	116.5	159	179.5	119.5	173	163.5	80.8646	77.669	86.1159	89.9661	83.311	69.8632	175.672	222.407	235.316	182.475	244.881	244.048	149.382	-1.42388	0.105986	-13.4346	3.79e-41	4.34e-40	Ferrous iron transport protein A	NA	K04758	feoA; ferrous iron transport protein A	27	02000	Transporters [BR:ko02000],	09183	09180
D|1136176.5.peg.808	1	905511	907784	+	2274	748.5	719	674.5	669	727.5	789	589.5	864	1328.5	501.5	1059	1297	504.056	503.099	475.755	493.339	480.691	515.159	891.991	1208.55	1745.81	768.236	1499.01	1941.9	918.967	-1.43873	0.191701	-7.50509	6.14e-14	2.26e-13	Ferrous iron transport protein B	NA	K04759	feoB; ferrous iron transport protein B	465	02000	Transporters [BR:ko02000],	09183	09180
D|1136176.5.peg.1453	1	1706024	1707016	+	993	49485	45890	48489	49329	52349	49759	75430	73758	67353	67871	62779	61467	33346.5	32110.2	34226.8	36376.6	34613.1	32489	114232	103172	88543.2	104074	88863.6	92030	66173.1	-1.54031	0.0689049	-22.3542	1.1e-110	6.71e-109	putative periplasmic substrate-binding protein	NA	K02002	proX; glycine betaine/proline transport system substrate-binding protein	218	02010 02000	ABC transporters [PATH:ko02010], Transporters [BR:ko02000],	09131 09183	09130 09180
D|1136176.5.peg.2121	1	2431725	2432993	+	1269	29020	28088	27938	25268	31134	30523	52356	49401	45852	37825	40617	40584	19555.7	19653.8	19720.5	18633.3	20585.7	19929.3	79288.7	69101.5	60277.7	58001	57493.3	60763.4	41917	-1.70482	0.0784452	-21.7327	1.01e-104	5.25e-103	Long-chain fatty acid transport protein	NA	K06076	fadL; long-chain fatty acid transport protein	193	02000	Transporters [BR:ko02000],	09183	09180
D|1136176.5.peg.1432	1	1684544	1685350	+	807	358	326	345	314	367	395	291	580	930	267	804	789	241.246	228.109	243.525	231.552	242.66	257.906	440.695	811.297	1222.59	409.419	1138.06	1181.31	554.031	-1.84872	0.244927	-7.54802	4.42e-14	1.64e-13	ABC-type tungstate transport system%2C periplasmic binding protein	NA	K05772	tupA, vupA; tungstate transport system substrate-binding protein	167	02010 02000	ABC transporters [PATH:ko02010], Transporters [BR:ko02000],	09131 09183	09130 09180
D|1136176.5.peg.1305	1	1517878	1518849	-	972	296	290	310	1044	311	317	1568	1269	1035	1273	434	776	199.466	202.919	218.819	769.874	205.633	206.978	2374.6	1775.06	1360.63	1952.02	614.327	1161.85	920.181	-2.35693	0.436169	-5.40372	6.53e-08	1.64e-07	Tricarboxylate transport protein TctC	NA	K07795	tctC; putative tricarboxylic transport membrane protein	220	02020 02000	Two-component system [PATH:ko02020], Transporters [BR:ko02000],	09132 09183	09130 09180
D|1136176.5.peg.3920	2	1084892	1085743	-	852	711	716	615	847	1299	861	2536	2731	2971	1702	2895	2706	479.123	501	434.109	624.601	858.896	562.17	3840.56	3820.09	3905.72	2609.85	4097.87	4051.49	2148.79	-2.68982	0.16009	-16.8019	2.36e-63	5.25e-62	Glycerol uptake facilitator protein	NA	K02440	GLPF; glycerol uptake facilitator protein	207	02000	Transporters [BR:ko02000],	09183	09180
D|1136176.5.peg.156	1	201542	203245	-	1704	1225.5	1146	1144	1150	1181.5	1324	879	3298	5828.5	577.5	10969.5	2429	825.492	801.88	807.513	848.042	780.875	864.475	1331.17	4613.2	7661.57	884.774	15526.6	3636.76	3215.2	-2.77165	0.571686	-4.8482	1.25e-06	2.82e-06	Acetate permease ActP (cation/acetate symporter)	NA	K14393	actP; cation/acetate symporter	568	02000	Transporters [BR:ko02000],	09183	09180
D|1136176.5.peg.2096	1	2388280	2389275	-	996	31888	31909	29171	27841	30358	31893	68449	151086	216945	42895	184373	103016	21488.4	22327.4	20590.9	20530.7	20072.7	20823.8	103660	211337	285199	65775.4	260980	154238	100585	-3.10303	0.271504	-11.429	2.99e-30	2.33e-29	TRAP-type C4-dicarboxylate transport system%2C periplasmic component	NA	K11688	dctP; C4-dicarboxylate-binding protein DctP	300	02020 02000	Two-component system [PATH:ko02020], Transporters [BR:ko02000],	09132 09183	09130 09180
