# Supplementary material for: Polysaccharide breakdown products drive degradation-dispersal cycles of foraging bacteria through changes in metabolism and motility
Source: eLife. 2024 Oct 21;13:RP93855. doi: 10.7554/eLife.93855 (PMC11493405; doi:10.7554/eLife.93855)
Supplement: Supplementary file 11. [file elife-93855-supp11.xlsx]

## Sheet: Sheet 1
Geneid	Chr	Start	End	Strand	Length	L1_raw	L2_raw	L3_raw	L4_raw	L5_raw	L6_raw	P1_raw	P2_raw	P3_raw	P4_raw	P5_raw	P6_raw	L1_DESeq	L2_DESeq	L3_DESeq	L4_DESeq	L5_DESeq	L6_DESeq	P1_DESeq	P2_DESeq	P3_DESeq	P4_DESeq	P5_DESeq	P6_DESeq	baseMean	log2FoldChange	lfcSE	stat	pvalue	padj	RASTtk_Annotation	RASTtk_Ontology_term	BlastKOALA_KO	BlastKOALA_KO_Definition	BlastKOALA_KO_Score	KEGG_pathway	KEGG_pathway_descr	KEGG_CategB	KEGG_CategA
D|1136176.5.peg.2129	1	2440319	2440525	-	207	1975.5	1634.5	1711.5	1903	1824.5	1798	220.5	236.5	188.5	291	147.5	167	1330.9	1143.34	1207.74	1403.32	1206.03	1173.96	333.171	330.114	247.147	446.221	208.078	250.037	773.338	2.04198	0.148726	13.7298	6.73e-43	8.24e-42	Cytochrome c-type biogenesis protein CcmD%2C interacts with CcmCE	NA	K02196	ccmD; heme exporter protein D	28	02010 02000	ABC transporters [PATH:ko02010], Transporters [BR:ko02000],	09131 09183	09130 09180
D|1136176.5.peg.4277	2	1507078	1508016	+	939	359.5	292.5	305	298	296	344	43	38.5	39	45.5	32	36.5	241.92	204.318	215.29	219.753	195.715	224.607	65.1199	53.1539	51.27	69.0032	45.296	53.9001	136.612	1.95303	0.117075	16.6819	1.77e-62	3.74e-61	Ferrichrome-binding periplasmic protein precursor (TC 3.A.1.14.3)	NA	K23227	fhuD; ferric hydroxamate transport system substrate-binding protein	162	02010 02000	ABC transporters [PATH:ko02010], Transporters [BR:ko02000],	09131 09183	09130 09180
D|1136176.5.peg.638	1	728215	728898	-	684	1217	1108.5	1126.5	1156	1171	1159.5	161.5	152	151.5	150	171	160	820.101	775.29	794.808	852.466	774.263	756.742	243.821	212.616	198.507	230.011	242.05	239.556	511.686	1.80731	0.066014	27.3777	5.05e-165	7.57e-163	Methionine ABC transporter permease protein	NA	K02072	metI; D-methionine transport system permease protein	182	02010 02000	ABC transporters [PATH:ko02010], Transporters [BR:ko02000],	09131 09183	09130 09180
D|1136176.5.peg.2106	1	2412854	2413792	-	939	61	57	52	49	66	56.5	10	5	8	3	16	5	41.1062	39.8841	36.7051	36.1339	43.6391	36.5639	15.1442	6.99394	10.5169	4.60021	22.648	7.48613	25.1185	1.7903	0.241475	7.41401	1.23e-13	4.42e-13	ABC-type sugar transport system%2C permease component	NA	K17316	gtsB, glcF; glucose/mannose transport system permease protein	269	02010 02000	ABC transporters [PATH:ko02010], Transporters [BR:ko02000],	09131 09183	09130 09180
D|1136176.5.peg.2105	1	2412000	2412857	-	858	65.5	81	63	67	75	63.5	5	13	10	12	9	12	43.8016	56.6774	44.4697	49.4076	49.5899	41.1344	7.57208	18.1842	13.1461	18.4009	12.7395	17.9667	31.0908	1.6952	0.214571	7.9004	2.78e-15	1.12e-14	ABC-type sugar transport system%2C permease component	NA	K17317	gtsC, glcG; glucose/mannose transport system permease protein	258	02010 02000	ABC transporters [PATH:ko02010], Transporters [BR:ko02000],	09131 09183	09130 09180
D|1136176.5.peg.2130	1	2440540	2441280	-	741	5323.5	4227	4260.5	4572	4424	4528	811.5	646	623	873	480.5	629.5	3587.02	2957.72	3007	3371.52	2925.14	2956.45	1228.19	903.617	819.005	1338.66	679.44	941.755	2059.63	1.67036	0.143407	11.6477	2.36e-31	1.9e-30	Cytochrome c-type biogenesis protein CcmC%2C putative heme lyase for CcmE	NA	K02195	ccmC; heme exporter protein C	260	02010 02000	ABC transporters [PATH:ko02010], Transporters [BR:ko02000],	09131 09183	09130 09180
D|1136176.5.peg.316	1	355996	356988	+	993	904	787	775.5	801	797.5	845	136	119	144.5	151	124.5	124.5	609.18	550.68	547.048	590.679	526.975	551.723	205.96	166.456	189.304	231.544	175.522	185.656	377.561	1.55137	0.0771593	20.1061	6.53e-90	2.42e-88	Thiamin ABC transporter%2C substrate-binding component	NA	K02064	thiB, tbpA; thiamine transport system substrate-binding protein	230	02010 02000	ABC transporters [PATH:ko02010], Transporters [BR:ko02000],	09131 09183	09130 09180
D|1136176.5.peg.4301	2	1535280	1536026	-	747	508	431	455.5	499	443	482	78.5	89	76.5	66	86.5	88.5	342.327	301.58	321.17	367.976	292.911	314.711	118.124	124.492	99.9107	101.205	121.733	131.756	219.825	1.4774	0.0958322	15.4166	1.27e-53	2.16e-52	Amino acid ABC transporter%2C ATP-binding protein	NA	K09972	aapP, bztD; general L-amino acid transport system ATP-binding protein [EC:7.4.2.1]	129	02010 02000	ABC transporters [PATH:ko02010], Transporters [BR:ko02000],	09131 09183	09130 09180
D|1136176.5.peg.2345	1	2675864	2676559	-	696	164.5	142.5	138.5	145	152	152	22.5	21	26	32	21	33	110.515	99.3603	97.4098	106.927	100.502	99.2449	33.3171	29.3745	34.18	49.0689	29.7255	49.4084	69.9195	1.45681	0.139057	10.4764	1.11e-25	7.25e-25	Urea ABC transporter%2C ATPase protein UrtE	NA	K11963	urtE; urea transport system ATP-binding protein	181	02010 02000	ABC transporters [PATH:ko02010], Transporters [BR:ko02000],	09131 09183	09130 09180
D|1136176.5.peg.3639	2	777042	778133	-	1092	3164.5	2958	3106.5	3058.5	3174.5	3231.5	575.5	584	637.5	601	518	519.5	2132.13	2069.77	2192.43	2255.05	2098.64	2109.61	870.789	816.892	837.409	921.576	733.229	777.06	1484.55	1.37576	0.0522143	26.3484	5.36e-153	6.07e-151	Maltose/maltodextrin transport ATP-binding protein MalK (EC 3.6.3.19)	KEGG_ENZYME:3.6.3.19	K10112	msmX, msmK, malK, sugC, ggtA, msiK; multiple sugar transport system ATP-binding protein	193	02010 02000	ABC transporters [PATH:ko02010], Transporters [BR:ko02000],	09131 09183	09130 09180
D|1136176.5.peg.2107	1	2413974	2415221	-	1248	639	632	662	652	769	756	114	102	134	120	127	158	430.604	442.223	467.285	480.803	508.461	493.613	172.643	142.676	176.158	184.009	179.768	236.562	326.234	1.37298	0.0927006	14.8109	1.25e-49	1.86e-48	ABC-type sugar transport system%2C periplasmic component	NA	K17315	gtsA, glcE; glucose/mannose transport system substrate-binding protein	346	02010 02000	ABC transporters [PATH:ko02010], Transporters [BR:ko02000],	09131 09183	09130 09180
D|1136176.5.peg.2131	1	2441427	2442095	-	669	417.5	417	395	455.5	431.5	425	82.5	97.5	73.5	87.5	64.5	83	281.004	291.784	278.818	335.529	284.976	277.494	124.182	135.682	95.9668	133.406	90.592	124.27	204.475	1.31694	0.0998086	13.1947	9.41e-40	1.03e-38	ABC transporter involved in cytochrome c biogenesis%2C CcmB subunit	NA	K02194	ccmB; heme exporter protein B	140	02010 02000	ABC transporters [PATH:ko02010], Transporters [BR:ko02000],	09131 09183	09130 09180
D|1136176.5.peg.4278	2	1508016	1510010	+	1995	428.5	406.5	358	357	358	430	77	76.5	76	74.5	64	81.5	288.417	284.087	252.701	263.262	236.709	280.759	116.61	106.308	99.9107	113.472	90.592	121.275	187.842	1.31293	0.0950269	13.8164	2.03e-43	2.52e-42	Ferrichrome transport system permease protein FhuB (TC 3.A.1.14.3)	NA	K23228	fhuB; ferric hydroxamate transport system permease protein	258	02010 02000	ABC transporters [PATH:ko02010], Transporters [BR:ko02000],	09131 09183	09130 09180
D|1136176.5.peg.4020	2	1208594	1209484	+	891	3040.5	2882.5	2708	2772	2927	2934	554	535	630	552.5	538.5	599.5	2048.57	2016.59	1911.49	2044.15	1935.33	1915.69	838.986	748.351	828.207	846.439	761.539	896.838	1399.35	1.2716	0.0483984	26.2736	3.84e-152	4.24e-150	Maltose/maltodextrin ABC transporter%2C permease protein MalG	NA	K10110	malG; maltose/maltodextrin transport system permease protein	296	02010 02000	ABC transporters [PATH:ko02010], Transporters [BR:ko02000],	09131 09183	09130 09180
D|1136176.5.peg.4186	2	1403773	1404750	+	978	176	163	153.5	169	169	180.5	34.5	29.5	34.5	43	24.5	41.5	118.601	114.054	107.998	124.625	111.743	117.527	51.4901	40.5648	44.6969	65.9364	33.972	61.3862	82.7162	1.23051	0.126854	9.70022	3.01e-22	1.74e-21	Ferrichrome ABC transporter%2C periplasmic iron-binding protein PvuB	NA	K23181	fecB; ferric citrate transport system substrate-binding protein	135	02010 02000	ABC transporters [PATH:ko02010], Transporters [BR:ko02000],	09131 09183	09130 09180
D|1136176.5.peg.2347	1	2677400	2678581	-	1182	137	123.5	131	105	110.5	126.5	31	25.5	31	20	24.5	26	92.3204	86.0656	92.4687	77.4299	72.7318	82.2688	46.9469	34.9697	40.753	30.6681	33.972	38.9279	60.7936	1.15289	0.143732	8.02115	1.05e-15	4.34e-15	Urea ABC transporter%2C permease protein UrtC	NA	K11961	urtC; urea transport system permease protein	335	02010 02000	ABC transporters [PATH:ko02010], Transporters [BR:ko02000],	09131 09183	09130 09180
D|1136176.5.peg.923	1	1042066	1042968	+	903	660	588.5	522	558	572	594.5	133.5	136.5	133	131	127.5	134	444.755	411.436	368.463	411.484	378.205	387.839	201.417	190.235	174.844	200.876	179.768	200.628	295.829	1.06806	0.0766683	13.9309	4.11e-44	5.25e-43	Oligopeptide transport system permease protein OppC (TC 3.A.1.5.1)	NA	K15582	oppC; oligopeptide transport system permease protein	249	02010 02024 01501 02000	ABC transporters [PATH:ko02010], Quorum sensing [PATH:ko02024], beta-Lactam resistance [PATH:ko01501], Transporters [BR:ko02000],	09131 09145 09175 09183	09130 09140 09160 09180
D|1136176.5.peg.336	1	373198	373875	+	678	10647.5	9251	9161.5	8941	9769.5	9848.5	2319	2397	2247	2440	2177.5	2164.5	7174.71	6473.12	6466.46	6593.34	6459.25	6430.03	3511.93	3352.89	2953.94	3741.51	3081.54	3240	4956.56	0.99436	0.0592389	16.7856	3.11e-63	6.85e-62	Uncharacterized ABC transporter%2C auxiliary component YrbC	NA	K07323	mlaC; phospholipid transport system substrate-binding protein	80	02010 02000	ABC transporters [PATH:ko02010], Transporters [BR:ko02000],	09131 09183	09130 09180
D|1136176.5.peg.4189	2	1406755	1407519	+	765	125.5	111	97	111.5	117.5	114.5	23	30	27	33.5	27	22	84.2339	77.669	68.4692	81.8544	77.3602	74.4337	34.8315	41.9636	35.4946	50.6023	38.2185	32.939	58.1725	0.990035	0.14059	7.04201	1.89e-12	6.34e-12	Ferrichrome ABC transporter (ATP binding subunit) PvuE	NA	K23184	fecE; ferric citrate transport system ATP-binding protein [EC:7.2.2.18]	172	02010 02000	ABC transporters [PATH:ko02010], Transporters [BR:ko02000],	09131 09183	09130 09180
D|1136176.5.peg.4188	2	1405781	1406752	+	972	215.5	216	194.5	181	207.5	184.5	43	39	57	44.5	55	53.5	144.882	151.14	136.938	133.474	136.868	120.139	65.1199	54.5527	74.933	67.4698	77.8525	79.353	103.56	0.972641	0.112093	8.67709	4.06e-18	1.93e-17	Ferrichrome ABC transporter (permease) PvuD	NA	K23182	fecD; ferric citrate transport system permease protein	225	02010 02000	ABC transporters [PATH:ko02010], Transporters [BR:ko02000],	09131 09183	09130 09180
D|1136176.5.peg.4187	2	1404747	1405781	+	1035	261	243	220	235.5	254	260.5	60.5	58.5	78.5	52	59.5	71	175.88	170.032	155.291	173.295	167.944	169.761	90.8649	81.1297	102.54	79.737	83.5145	106.303	129.691	0.894038	0.0964264	9.27172	1.83e-20	9.82e-20	Ferrichrome ABC transporter (permease) PvuC	NA	K23183	fecC; ferric citrate transport system permease protein	177	02010 02000	ABC transporters [PATH:ko02010], Transporters [BR:ko02000],	09131 09183	09130 09180
D|1136176.5.peg.333	1	371124	371918	+	795	4066.5	3575	3544.5	3531	3677.5	3867	1114	904	1011	1026	865.5	894.5	2739.96	2501.5	2501.6	2603.86	2431.23	2524.87	1687.06	1264.5	1329.08	1573.27	1224.41	1338.52	1976.65	0.863151	0.0783897	11.011	3.38e-28	2.43e-27	Uncharacterized ABC transporter%2C ATP-binding protein YrbF	NA	K02065	mlaF, linL, mkl; phospholipid/cholesterol/gamma-HCH transport system ATP-binding protein	189	02010 02000	ABC transporters [PATH:ko02010], Transporters [BR:ko02000],	09131 09183	09130 09180
D|1136176.5.peg.335	1	372702	373193	+	492	4866.5	4113	4110.5	4111.5	4269.5	4306	1111	1092.5	1203	1199	1064.5	1097	3279.06	2877.95	2901.12	3031.56	2822.66	2811.5	1682.52	1527.48	1581.48	1838.55	1506.09	1642.46	2291.87	0.85859	0.0592424	14.4928	1.34e-47	1.93e-46	Uncharacterized ABC transporter%2C periplasmic component YrbD	NA	K02067	mlaD, linM; phospholipid/cholesterol/gamma-HCH transport system substrate-binding protein	116	02010 02000	ABC transporters [PATH:ko02010], Transporters [BR:ko02000],	09131 09183	09130 09180
D|1136176.5.peg.4034	2	1223635	1225686	+	2052	2013.5	1968	1930.5	1878.5	2048.5	2101.5	477	510.5	636.5	478	573	498.5	1356.5	1377.05	1362.33	1384.89	1354.13	1371.8	722.376	713.382	836.095	732.967	811.081	745.618	1064.02	0.845352	0.043536	19.4173	5.51e-84	1.85e-82	Macrolide export ATP-binding/permease protein MacB (EC 3.6.3.-)	KEGG_ENZYME:3.6.3.-	K05685	macB; macrolide transport system ATP-binding/permease protein [EC:3.6.3.-]	401	02010 02000	ABC transporters [PATH:ko02010], Transporters [BR:ko02000],	09131 09183	09130 09180
D|1136176.5.peg.2346	1	2676561	2677403	-	843	108	107.5	98	104	101.5	98	25	41	28.5	30.5	23.5	21.5	72.7781	74.8701	69.1751	76.6925	66.781	63.9868	37.8604	57.3503	36.8092	46.0021	32.5565	31.4417	55.5253	0.80735	0.143561	5.62374	1.87e-08	4.9e-08	Urea ABC transporter%2C ATPase protein UrtD	NA	K11962	urtD; urea transport system ATP-binding protein	191	02010 02000	ABC transporters [PATH:ko02010], Transporters [BR:ko02000],	09131 09183	09130 09180
D|1136176.5.peg.4004	2	1188668	1189597	+	930	187.5	147.5	161.5	180	181.5	182	68	44	48	46.5	34.5	43	126.014	102.859	113.645	132.737	119.677	118.833	102.98	61.5466	63.1015	70.5366	48.127	64.3807	93.7031	0.803358	0.133156	6.03319	1.61e-09	4.5e-09	Phosphate transport system permease protein PstC (TC 3.A.1.7.1)	NA	K02037	pstC; phosphate transport system permease protein	200	02010 02000	ABC transporters [PATH:ko02010], Transporters [BR:ko02000],	09131 09183	09130 09180
D|1136176.5.peg.1086	1	1229498	1230274	+	777	165	130.5	147.5	153.5	165	151.5	42.5	46.5	37	37	42.5	48	111.189	90.9637	103.763	112.826	109.098	98.592	63.6054	64.3442	48.6407	56.736	59.451	71.8668	82.5896	0.784714	0.119421	6.57101	5e-11	1.53e-10	Lysine-arginine-ornithine-binding periplasmic protein precursor (TC 3.A.1.3.1)	NA	K10022	aotJ; arginine/ornithine transport system substrate-binding protein	124	02010 02000	ABC transporters [PATH:ko02010], Transporters [BR:ko02000],	09131 09183	09130 09180
D|1136176.5.peg.334	1	371920	372699	+	780	5719.5	4838	4874.5	5103.5	5044	5220.5	1682.5	1405.5	1521	1582	1290	1271.5	3853.87	3385.25	3440.4	3763.09	3335.08	3408.28	2547.25	1965.3	1999.53	2425.85	1825.99	1902.97	2821.07	0.742391	0.087569	8.47779	2.3e-17	1.05e-16	Uncharacterized ABC transporter%2C permease component YrbE	NA	K02066	mlaE, linK; phospholipid/cholesterol/gamma-HCH transport system permease protein	268	02010 02000	ABC transporters [PATH:ko02010], Transporters [BR:ko02000],	09131 09183	09130 09180
D|1136176.5.peg.318	1	358680	359384	+	705	126	129.5	131.5	109.5	126.5	133.5	32.5	31	34.5	46.5	44.5	36	84.9078	90.264	92.4687	80.3796	83.311	86.8393	48.4613	43.3624	44.6969	70.5366	62.282	53.9001	70.1175	0.687587	0.125735	5.46854	4.54e-08	1.15e-07	Thiamin ABC transporter%2C ATPase component	NA	K02062	thiQ; thiamine transport system ATP-binding protein [EC:7.6.2.15]	116	02010 02000	ABC transporters [PATH:ko02010], Transporters [BR:ko02000],	09131 09183	09130 09180
D|1136176.5.peg.1657	1	1922399	1923394	-	996	99	90.5	88	96	92	102.5	25.5	31	24.5	26	36	26.5	66.7133	62.9749	62.1164	70.793	60.8302	66.5986	37.8604	43.3624	31.5507	39.8685	50.958	38.9279	52.7129	0.686405	0.140753	4.87667	1.08e-06	2.46e-06	Vitamin B12 ABC transporter%2C permease component BtuC	NA	K06073	btuC; vitamin B12 transport system permease protein	157	02010 02000	ABC transporters [PATH:ko02010], Transporters [BR:ko02000],	09131 09183	09130 09180
D|1136176.5.peg.4145	2	1357626	1359785	+	2160	1851	1660	1755	1765	1869.5	1861	470	550	615	466.5	580	523	1247.34	1161.54	1238.8	1301.56	1235.78	1215.1	711.775	769.333	808.488	714.566	820.99	783.049	1000.69	0.681688	0.048532	14.0462	8.13e-45	1.08e-43	Type I secretion system ATPase%2C LssB family LapB	NA	K12541	lapB; ATP-binding cassette, subfamily C, bacterial LapB	245	02010 02000 02044	ABC transporters [PATH:ko02010], Transporters [BR:ko02000], Secretion system [BR:ko02044],	09131 09183	09130 09180
D|1136176.5.peg.1546	1	1802992	1804968	-	1977	535.5	507	511	473	489	539	160	142	140.5	165	153	172.5	360.521	354.758	360.699	348.803	323.326	351.928	242.306	198.628	184.046	253.012	216.571	257.523	287.677	0.640257	0.0789934	8.1052	5.27e-16	2.21e-15	Ferric hydroxamate ABC transporter (TC 3.A.1.14.3)%2C permease component FhuB	NA	K23228	fhuB; ferric hydroxamate transport system permease protein	268	02010 02000	ABC transporters [PATH:ko02010], Transporters [BR:ko02000],	09131 09183	09130 09180
D|1136176.5.peg.924	1	1043011	1043982	+	972	702	625.5	566	570.5	619	622	197.5	189.5	221.5	171	170.5	188	473.058	437.325	399.521	420.334	409.282	406.121	298.34	264.371	290.53	262.212	240.635	281.478	348.601	0.63657	0.0710169	8.96363	3.14e-19	1.58e-18	Oligopeptide transport ATP-binding protein OppD (TC 3.A.1.5.1)	NA	K15583	oppD; oligopeptide transport system ATP-binding protein	279	02010 02024 01501 02000	ABC transporters [PATH:ko02010], Quorum sensing [PATH:ko02024], beta-Lactam resistance [PATH:ko01501], Transporters [BR:ko02000],	09131 09145 09175 09183	09130 09140 09160 09180
D|1136176.5.peg.4019	2	1207011	1208582	+	1572	1207.5	1134.5	1095	1067	1178	1236	363	352	395	316.5	346.5	354.5	813.363	793.483	772.926	786.835	778.892	807.018	549.733	492.373	519.273	484.556	489.763	530.018	651.519	0.633028	0.0468743	13.5048	1.47e-41	1.72e-40	Maltose/maltodextrin ABC transporter%2C permease protein MalF	NA	K10109	malF; maltose/maltodextrin transport system permease protein	339	02010 02000	ABC transporters [PATH:ko02010], Transporters [BR:ko02000],	09131 09183	09130 09180
D|1136176.5.peg.2104	1	2410881	2411993	-	1113	1560.5	1409	1427	1328	1477	1449	490	393	450	475	405	441	1051.24	985.906	1007.27	979.304	976.59	946.091	742.063	549.723	591.576	728.367	573.277	660.276	815.974	0.630779	0.0749063	8.4209	3.74e-17	1.68e-16	Glucose ABC transporter%2C ATP-binding subunit (EC 3.6.3.-)	KEGG_ENZYME:3.6.3.-	K10112	msmX, msmK, malK, sugC, ggtA, msiK; multiple sugar transport system ATP-binding protein	230	02010 02000	ABC transporters [PATH:ko02010], Transporters [BR:ko02000],	09131 09183	09130 09180
D|1136176.5.peg.925	1	1043979	1044965	+	987	1249	1137.5	1078	1074.5	1061	1145	387.5	332.5	395.5	331	332.5	315	841.665	795.582	760.926	791.997	701.531	747.601	586.079	464.397	519.273	507.557	469.946	471.626	638.182	0.620319	0.0680802	9.1116	8.12e-20	4.23e-19	Oligopeptide transport ATP-binding protein OppF (TC 3.A.1.5.1)	NA	K10823	oppF; oligopeptide transport system ATP-binding protein	262	02010 02024 01501 02000	ABC transporters [PATH:ko02010], Quorum sensing [PATH:ko02024], beta-Lactam resistance [PATH:ko01501], Transporters [BR:ko02000],	09131 09145 09175 09183	09130 09140 09160 09180
D|1136176.5.peg.1545	1	1801204	1802859	-	1656	38	42	36	37	39	39	15	16	8	8	9	16	25.6071	29.3883	25.4113	27.2848	25.7867	25.4642	22.7162	22.3806	10.5169	12.2672	12.7395	23.9556	21.9599	0.612409	0.213338	2.87061	0.00409686	0.00637962	Type I secretion system ATPase%2C LssB family LapB	NA	K06159	yojI; multidrug/microcin transport system ATP-binding/permease protein	285	02010 02000	ABC transporters [PATH:ko02010], Transporters [BR:ko02000],	09131 09183	09130 09180
D|1136176.5.peg.4429	2	1674600	1675475	+	876	130	105	107.5	115.5	115.5	112.5	30.5	43.5	33.5	31.5	37.5	42.5	87.6033	73.4707	75.5279	84.8042	76.0378	73.1278	45.4325	60.1479	43.3823	47.5355	52.3735	62.8835	65.1939	0.594608	0.129092	4.60606	4.1e-06	8.86e-06	ABC transporter in pyoverdin gene cluster%2C permease component	NA	K09816	znuB; zinc transport system permease protein	230	02010 02000	ABC transporters [PATH:ko02010], Transporters [BR:ko02000],	09131 09183	09130 09180
D|1136176.5.peg.4428	2	1673866	1674600	+	735	68.5	68.5	57	67	68.5	78	18.5	31	12	24	18.5	25.5	45.8233	47.581	40.2345	49.4076	44.9615	50.9283	27.2595	43.3624	15.7754	36.8017	25.479	37.4306	38.7537	0.593954	0.171171	3.46995	0.000521	0.000912	ABC transporter in pyoverdin gene cluster%2C ATP-binding component	NA	K09817	znuC; zinc transport system ATP-binding protein [EC:7.2.2.20]	107	02010 02000	ABC transporters [PATH:ko02010], Transporters [BR:ko02000],	09131 09183	09130 09180
D|1136176.5.peg.3462	2	573947	575239	+	1293	87	84	90	94	113	92	31	36	31	27	28	27	58.6268	58.7765	63.5281	69.3182	74.7154	60.0693	46.9469	50.3563	40.753	41.4019	39.634	40.4251	53.7126	0.569019	0.140409	4.05259	5.07e-05	9.84e-05	Glycerol-3-phosphate ABC transporter%2C periplasmic glycerol-3-phosphate-binding protein (TC 3.A.1.1.3)	NA	K05813	ugpB; sn-glycerol 3-phosphate transport system substrate-binding protein	274	02010 02000	ABC transporters [PATH:ko02010], Transporters [BR:ko02000],	09131 09183	09130 09180
D|1136176.5.peg.4005	2	1189603	1190526	+	924	122.5	111.5	129.5	136	123.5	125	29	42	41	48.5	28.5	52	82.2123	77.669	91.057	100.29	81.3274	81.6159	43.918	58.7491	53.8992	73.6034	39.634	77.8557	71.8193	0.567713	0.140624	4.0371	5.41e-05	0.000105	Phosphate transport system permease protein PstA (TC 3.A.1.7.1)	NA	K02038	pstA; phosphate transport system permease protein	175	02010 02000	ABC transporters [PATH:ko02010], Transporters [BR:ko02000],	09131 09183	09130 09180
D|1136176.5.peg.3819	2	974173	976023	-	1851	2344	2253	2229	2229	2373	2429	696	779	835	748	765	767	1579.55	1576.47	1573.38	1643.73	1569.02	1585.96	1054.03	1089.66	1097.7	1146.99	1082.86	1148.37	1345.64	0.525653	0.034989	15.0234	5.16e-51	8.12e-50	Lipid A export ATP-binding/permease protein MsbA	NA	K18893	vcaM; ATP-binding cassette, subfamily B, multidrug efflux pump	436	02010 02000	ABC transporters [PATH:ko02010], Transporters [BR:ko02000],	09131 09183	09130 09180
D|1136176.5.peg.4149	2	1363089	1364033	+	945	1521	1367.5	1439.5	1424.5	1604	1576	483.5	469.5	534.5	433.5	514	524	1024.96	956.518	1015.74	1050.1	1060.56	1029.01	731.463	656.031	702.004	663.964	727.567	784.546	866.872	0.525313	0.0506782	10.3657	3.55e-25	2.28e-24	Phosphate ABC transporter%2C periplasmic phosphate-binding protein PstS (TC 3.A.1.7.1)	NA	K02040	pstS; phosphate transport system substrate-binding protein	35	02010 02020 05152 02000	ABC transporters [PATH:ko02010], Two-component system [PATH:ko02020], Tuberculosis [PATH:ko05152], Transporters [BR:ko02000],	09131 09132 09171 09183	09130 09160 09180
D|1136176.5.peg.1949	1	2237025	2237717	-	693	268.5	268	260.5	269.5	286	293.5	75	98	100	62	107	107.5	180.598	187.525	183.526	198.368	189.103	191.308	113.581	137.081	131.461	95.0711	151.458	160.203	159.94	0.51569	0.0948796	5.4352	5.47e-08	1.38e-07	Lipoprotein releasing system ATP-binding protein LolD	NA	K09810	lolD; lipoprotein-releasing system ATP-binding protein [EC:3.6.3.-]	148	02010 02000	ABC transporters [PATH:ko02010], Transporters [BR:ko02000],	09131 09183	09130 09180
D|1136176.5.peg.1948	1	2235780	2237024	-	1245	245.5	255.5	250.5	218.5	276	255.5	67	86	124.5	61.5	103	66.5	165.098	178.429	176.467	160.759	182.491	166.496	101.466	120.296	163.012	93.5377	145.796	98.8169	146.055	0.502866	0.11805	4.25977	2.05e-05	4.14e-05	Lipoprotein releasing system transmembrane protein LolE	NA	K09808	lolC_E; lipoprotein-releasing system permease protein	263	02010 02000	ABC transporters [PATH:ko02010], Transporters [BR:ko02000],	09131 09183	09130 09180
D|1136176.5.peg.1211	1	1409983	1410801	-	819	108	96.5	107	87.5	98.5	110	23	25.5	42	37	47.5	30	72.7781	67.1732	75.5279	64.1562	64.7974	71.822	34.8315	34.9697	55.2138	56.736	66.5285	44.9168	59.1209	0.502819	0.139816	3.5963	0.000323	0.000578	Phosphonate ABC transporter ATP-binding protein (TC 3.A.1.9.1)	NA	K02041	phnC; phosphonate transport system ATP-binding protein [EC:7.3.2.2]	165	02010 02000	ABC transporters [PATH:ko02010], Transporters [BR:ko02000],	09131 09183	09130 09180
D|1136176.5.peg.4006	2	1190602	1191351	+	750	348	329	329	313	367	333	98	121	123	126	105	108	234.507	230.208	232.231	230.815	242.66	217.425	148.413	169.253	161.698	193.209	148.627	161.7	197.562	0.499048	0.0777152	6.4215	1.35e-10	4.04e-10	Phosphate transport ATP-binding protein PstB (TC 3.A.1.7.1)	NA	K02036	pstB; phosphate transport system ATP-binding protein [EC:7.3.2.1]	205	02010 02000	ABC transporters [PATH:ko02010], Transporters [BR:ko02000],	09131 09183	09130 09180
D|1136176.5.peg.2953	1	3396330	3397067	-	738	331	289.5	282.5	276.5	313.5	304.5	124.5	98.5	87.5	102.5	115	80.5	223.051	202.219	199.055	203.53	206.955	198.49	187.787	137.081	114.371	156.407	162.782	119.778	175.959	0.494236	0.100357	4.92479	8.45e-07	1.95e-06	ABC-type polar amino acid transport system%2C ATPase component	NA	K16963	yxeO; putative S-methylcysteine transport system ATP-binding protein	175	02010 02000	ABC transporters [PATH:ko02010], Transporters [BR:ko02000],	09131 09183	09130 09180
D|1136176.5.peg.317	1	357074	358669	+	1596	299	286.5	284.5	263.5	264.5	292.5	72.5	99	105.5	98.5	101.5	101	201.488	200.12	200.467	193.943	174.556	190.655	109.038	138.48	138.035	150.274	142.965	151.22	165.937	0.483448	0.0860902	5.6156	1.96e-08	5.13e-08	Thiamin ABC transporter%2C transmembrane component	NA	K02063	thiP; thiamine transport system permease protein	320	02010 02000	ABC transporters [PATH:ko02010], Transporters [BR:ko02000],	09131 09183	09130 09180
D|1136176.5.peg.2348	1	2678592	2680220	-	1629	281	238.5	255	243	254.5	227.5	84	80.5	106	73	92.5	77	189.358	166.534	179.996	179.195	167.944	148.214	127.211	111.903	139.349	111.939	130.226	115.286	147.263	0.482902	0.0948499	5.09122	3.56e-07	8.47e-07	Urea ABC transporter%2C permease protein UrtB	NA	K11960	urtB; urea transport system permease protein	318	02010 02000	ABC transporters [PATH:ko02010], Transporters [BR:ko02000],	09131 09183	09130 09180
D|1136176.5.peg.1212	1	1410941	1411897	-	957	471	445	487	430	520	487	177	184	152	139	186	138	317.393	311.376	343.758	317.094	343.823	317.975	268.051	257.377	199.821	213.143	263.283	206.617	279.976	0.471407	0.0798429	5.90418	3.54e-09	9.76e-09	Phosphonate ABC transporter phosphate-binding periplasmic component (TC 3.A.1.9.1)	NA	K02044	phnD; phosphonate transport system substrate-binding protein	214	02010 02000	ABC transporters [PATH:ko02010], Transporters [BR:ko02000],	09131 09183	09130 09180
D|1136176.5.peg.1879	1	2163900	2164787	+	888	834	788.5	800.5	755.5	833.5	866.5	275.5	248.5	352	229.5	306	278.5	562.009	551.38	564.695	556.758	550.778	565.435	416.464	346.899	462.744	351.15	433.143	416.229	481.474	0.463839	0.0655408	7.0771	1.47e-12	4.97e-12	Peptide transport system permease protein SapC	NA	K19228	sapC; cationic peptide transport system permease protein	186	02010 01503 02000	ABC transporters [PATH:ko02010], Cationic antimicrobial peptide (CAMP) resistance [PATH:ko01503], Transporters [BR:ko02000],	09131 09175 09183	09130 09160 09180
D|1136176.5.peg.4427	2	1672931	1673866	+	936	165.5	141.5	130	130	165.5	159	52	51.5	71	63	37.5	37.5	111.189	98.6606	91.7629	95.8656	109.098	103.815	78.7496	71.3382	93.3376	96.6045	52.3735	55.3973	88.1826	0.447193	0.13009	3.43756	0.000587	0.00102126	Cation ABC transporter%2C periplasmic cation-binding protein	NA	K09815	znuA; zinc transport system substrate-binding protein	187	02010 02000	ABC transporters [PATH:ko02010], Transporters [BR:ko02000],	09131 09183	09130 09180
D|1136176.5.peg.3331	2	424809	426578	-	1770	770.5	762.5	741	713	796.5	827.5	243.5	251	285.5	250	289	294.5	518.881	533.187	523.048	525.786	526.314	539.971	368.003	351.096	374.665	383.351	409.079	440.184	457.797	0.446306	0.0557753	8.00186	1.23e-15	5.06e-15	Lipid A export ATP-binding/permease protein MsbA	NA	K18890	mdlB, smdB; ATP-binding cassette, subfamily B, multidrug efflux pump	296	02010 02000	ABC transporters [PATH:ko02010], Transporters [BR:ko02000],	09131 09183	09130 09180
D|1136176.5.peg.1411	1	1658099	1659133	+	1035	1227	1235	1202	1162	1325	1387	427	450	450	475	474	363	826.84	864.155	848.454	856.891	876.088	905.61	646.655	629.454	591.576	728.367	670.947	543.493	749.044	0.443435	0.0617843	7.17715	7.12e-13	2.46e-12	ABC transporter%2C periplasmic spermidine putrescine-binding protein PotD (TC 3.A.1.11.1)	NA	K11069	potD; spermidine/putrescine transport system substrate-binding protein	233	02010 02000	ABC transporters [PATH:ko02010], Transporters [BR:ko02000],	09131 09183	09130 09180
D|1136176.5.peg.637	1	727339	728148	-	810	7775	7569	7330	6747	7883	7862	2515	2757	2946	2492	2590	2602	5239.35	5296.19	5174.01	4975.42	5212.23	5133.31	3808.75	3856.46	3872.85	3821.24	3666.14	3895.78	4495.98	0.437079	0.0262456	16.6534	2.86e-62	6e-61	Methionine ABC transporter substrate-binding protein	NA	K02073	metQ; D-methionine transport system substrate-binding protein	195	02010 02000	ABC transporters [PATH:ko02010], Transporters [BR:ko02000],	09131 09183	09130 09180
D|1136176.5.peg.1412	1	1659353	1660390	+	1038	1073	1217	1155	1008	1165	1242	371	403	432	416	423	394	723.064	851.56	815.278	743.327	770.296	810.935	561.848	563.711	567.913	637.896	598.756	589.907	686.208	0.422307	0.0577188	7.31663	2.54e-13	9.02e-13	ABC transporter%2C periplasmic spermidine putrescine-binding protein PotD (TC 3.A.1.11.1)	NA	K11069	potD; spermidine/putrescine transport system substrate-binding protein	247	02010 02000	ABC transporters [PATH:ko02010], Transporters [BR:ko02000],	09131 09183	09130 09180
D|1136176.5.peg.1210	1	1409186	1409986	-	801	85.5	87	74.5	85.5	83	91.5	30.5	27	27	33	35.5	28	57.2791	60.8757	52.2342	62.6813	54.8795	59.4164	45.4325	37.7673	35.4946	50.6023	49.5425	41.9223	50.6773	0.419038	0.139958	2.99403	0.00275318	0.00439487	Phosphonate ABC transporter permease protein phnE2 (TC 3.A.1.9.1)	NA	K02042	phnE; phosphonate transport system permease protein	216	02010 02000	ABC transporters [PATH:ko02010], Transporters [BR:ko02000],	09131 09183	09130 09180
D|1136176.5.peg.986	1	1118188	1118928	+	741	612.5	494	486	547	520.5	540	199	180	225	178	183.5	179.5	412.409	345.662	343.052	403.373	343.823	352.581	301.369	251.782	295.788	272.946	259.036	268.003	320.819	0.416164	0.0782477	5.31855	1.05e-07	2.59e-07	Arginine/ornithine ABC transporter%2C permease protein AotQ	NA	K10024	aotQ; arginine/ornithine transport system permease protein	188	02010 02000	ABC transporters [PATH:ko02010], Transporters [BR:ko02000],	09131 09183	09130 09180
D|1136176.5.peg.1409	1	1656323	1657180	+	858	2181.5	2124.5	1885.5	1764.5	2018.5	2263.5	640.5	681.5	954	587	788.5	779	1469.71	1486.21	1330.56	1300.82	1334.3	1477.57	969.226	952.574	1254.14	900.108	1115.41	1166.34	1229.75	0.401061	0.0839569	4.77698	1.78e-06	3.96e-06	Spermidine Putrescine ABC transporter permease component PotB (TC 3.A.1.11.1)	NA	K11071	potB; spermidine/putrescine transport system permease protein	271	02010 02000	ABC transporters [PATH:ko02010], Transporters [BR:ko02000],	09131 09183	09130 09180
D|1136176.5.peg.3465	2	577301	578599	+	1299	103.5	101.5	88	105	102.5	111.5	33.5	34.5	35.5	44.5	29.5	45	69.4087	70.6718	62.1164	77.4299	67.4422	72.4749	49.9757	47.5588	46.0115	67.4698	41.0495	67.3752	61.582	0.40102	0.13292	3.01701	0.00255278	0.0040862	Glycerol-3-phosphate ABC transporter%2C ATP-binding protein UgpC (TC 3.A.1.1.3)	NA	K05816	ugpC; sn-glycerol 3-phosphate transport system ATP-binding protein [EC:7.6.2.10]	132	02010 02000	ABC transporters [PATH:ko02010], Transporters [BR:ko02000],	09131 09183	09130 09180
D|1136176.5.peg.1881	1	2165785	2166567	+	783	268.5	256.5	245.5	267.5	275	317.5	69	119.5	120.5	87	100.5	109.5	180.598	179.128	172.938	196.893	181.83	206.978	104.495	166.456	157.754	133.406	141.55	163.198	165.435	0.364085	0.0984635	3.69766	0.000218	0.000398	Peptide transport system ATP-binding protein SapF	NA	K19230	sapF; cationic peptide transport system ATP-binding protein	178	02010 01503 02000	ABC transporters [PATH:ko02010], Cationic antimicrobial peptide (CAMP) resistance [PATH:ko01503], Transporters [BR:ko02000],	09131 09175 09183	09130 09160 09180
D|1136176.5.peg.337	1	373875	374183	+	309	4105.5	3347.5	3444.5	3715.5	3708	3778	1394	1443	1380.5	1493.5	1311	1216	2766.24	2341.96	2431.01	2739.54	2451.72	2466.76	2111.09	2018.45	1814.17	2289.37	1855.72	1820.63	2258.89	0.352089	0.0707411	4.97715	6.45e-07	1.51e-06	Uncharacterized protein YrbB	NA	K07122	mlaB; phospholipid transport system transporter-binding protein	22	02010 02000	ABC transporters [PATH:ko02010], Transporters [BR:ko02000],	09131 09183	09130 09180
D|1136176.5.peg.4018	2	1205745	1206929	+	1185	4155	3844	4014	3874	4306	4244	1462	1550	1525	1544	1503	1592	2799.94	2689.73	2833.35	2856.79	2847.12	2771.02	2214.07	2168.12	2004.79	2367.58	2127.5	2383.58	2505.3	0.341435	0.0449371	7.59806	3.01e-14	1.13e-13	Maltose/maltodextrin ABC transporter%2C substrate binding periplasmic protein MalE	NA	K10108	malE; maltose/maltodextrin transport system substrate-binding protein	307	02010 02030 02000	ABC transporters [PATH:ko02010], Bacterial chemotaxis [PATH:ko02030], Transporters [BR:ko02000],	09131 09142 09183	09130 09140 09180
D|1136176.5.peg.1880	1	2164787	2165788	+	1002	832	792	798	749.5	860	897.5	307.5	286.5	391	270	357	276.5	560.661	554.179	563.283	552.333	568.63	585.676	464.925	400.053	514.014	414.019	505.333	413.234	508.028	0.318188	0.0655433	4.85462	1.21e-06	2.73e-06	Peptide transport system ATP-binding protein SapD	NA	K19229	sapD; cationic peptide transport system ATP-binding protein	254	02010 01503 02000	ABC transporters [PATH:ko02010], Cationic antimicrobial peptide (CAMP) resistance [PATH:ko01503], Transporters [BR:ko02000],	09131 09175 09183	09130 09160 09180
D|1136176.5.peg.1410	1	1657180	1657950	+	771	1247.5	1169.5	1086.5	1027	1124	1267.5	375	413.5	588	405	451	441	840.318	817.973	766.573	757.338	743.187	827.259	567.906	577.699	772.993	621.029	638.39	660.276	715.912	0.307005	0.073959	4.15102	3.31e-05	6.56e-05	Spermidine Putrescine ABC transporter permease component potC (TC_3.A.1.11.1)	NA	K11070	potC; spermidine/putrescine transport system permease protein	209	02010 02000	ABC transporters [PATH:ko02010], Transporters [BR:ko02000],	09131 09183	09130 09180
D|1136176.5.peg.4273	2	1501915	1502700	-	786	128	106	110	104	125	120	48	58	52	37	38	38	86.2555	74.1704	77.6455	76.6925	82.6498	78.3512	72.6919	81.1297	68.3599	56.736	53.789	56.8946	72.1138	0.286172	0.119817	2.38842	0.0169212	0.0244394	Ferrichrome transport ATP-binding protein FhuC (TC 3.A.1.14.3)	NA	K10829	fhuC; ferric hydroxamate transport system ATP-binding protein [EC:7.2.2.16]	172	02010 02000	ABC transporters [PATH:ko02010], Transporters [BR:ko02000],	09131 09183	09130 09180
D|1136176.5.peg.1950	1	2237710	2238930	-	1221	375	382.5	324	301	363	385	113	173	169.5	104.5	153	124	252.702	267.293	228.701	221.966	240.015	251.377	171.129	241.99	222.17	159.474	216.571	185.656	221.587	0.284602	0.0967855	2.94054	0.00327638	0.00516083	Lipoprotein releasing system transmembrane protein LolC	NA	K09808	lolC_E; lipoprotein-releasing system permease protein	233	02010 02000	ABC transporters [PATH:ko02010], Transporters [BR:ko02000],	09131 09183	09130 09180
D|1136176.5.peg.2392	1	2726803	2727780	-	978	486	451.5	440	469	455.5	522	190.5	181	216	172.5	186.5	162	327.501	315.574	310.582	345.853	300.845	340.828	287.739	253.181	283.957	263.746	263.283	242.551	294.637	0.282848	0.0679229	4.16425	3.12e-05	6.2e-05	Phosphate ABC transporter%2C periplasmic phosphate-binding protein PstS (TC 3.A.1.7.1)	NA	K02040	pstS; phosphate transport system substrate-binding protein	190	02010 02020 05152 02000	ABC transporters [PATH:ko02010], Two-component system [PATH:ko02020], Tuberculosis [PATH:ko05152], Transporters [BR:ko02000],	09131 09132 09171 09183	09130 09160 09180
D|1136176.5.peg.1945	1	2230914	2232662	-	1749	2644	2592	2655	2443.5	2848.5	2703.5	900.5	1103.5	1191	914.5	1144	1003	1781.72	1813.68	1874.08	1801.54	1883.09	1764.86	1362.97	1542.86	1565.71	1401.53	1619.33	1501.72	1659.42	0.278737	0.0461379	6.0414	1.53e-09	4.28e-09	Lipid A export ATP-binding/permease protein MsbA	NA	K11085	msbA; ATP-binding cassette, subfamily B, bacterial MsbA [EC:3.6.3.-]	416	02010 02000	ABC transporters [PATH:ko02010], Transporters [BR:ko02000],	09131 09183	09130 09180
D|1136176.5.peg.2955	1	3397866	3398615	-	750	225	239	232	190	252	238	88	82	97	88	94	94	151.621	167.233	163.761	140.111	166.622	155.397	133.269	114.701	127.518	134.94	133.057	140.739	144.081	0.271604	0.0883926	3.0727	0.00212129	0.00341911	Amino acid ABC transporter%2C periplasmic amino acid-binding portion	NA	K16961	yxeM; putative S-methylcysteine transport system substrate-binding protein	173	02010 02000	ABC transporters [PATH:ko02010], Transporters [BR:ko02000],	09131 09183	09130 09180
D|1136176.5.peg.91	1	115275	116243	+	969	607	544	562.5	518	587	612	222.5	232.5	253	207	237	204	409.04	380.648	396.698	381.987	388.123	399.591	336.2	324.519	332.597	317.415	335.473	305.434	358.977	0.271304	0.0570476	4.75575	1.98e-06	4.37e-06	Cell division protein FtsX	NA	K09811	ftsX; cell division transport system permease protein	126	02010 03036 02000	ABC transporters [PATH:ko02010], Chromosome and associated proteins [BR:ko03036], Transporters [BR:ko02000],	09131 09182 09183	09130 09180
D|1136176.5.peg.639	1	728888	729922	-	1035	1021	957.5	968.5	947	1047	1020.5	369.5	473	383.5	417	389	356	688.023	669.633	683.28	698.344	692.275	665.986	558.819	661.626	503.497	639.43	550.629	533.012	628.713	0.250264	0.0641024	3.90414	9.46e-05	0.000179	Methionine ABC transporter ATP-binding protein	NA	K02071	metN; D-methionine transport system ATP-binding protein	253	02010 02000	ABC transporters [PATH:ko02010], Transporters [BR:ko02000],	09131 09183	09130 09180
D|1136176.5.peg.2349	1	2680456	2681742	-	1287	125	125	102	119	118	111	57	49	44	45	53	33	84.2339	87.4651	71.9986	87.7539	78.0214	72.4749	86.3217	68.5406	57.843	69.0032	75.0215	49.4084	74.0072	0.248369	0.125191	1.98393	0.047264	0.0635572	Urea ABC transporter%2C urea binding protein	NA	K11959	urtA; urea transport system substrate-binding protein	350	02010 02000	ABC transporters [PATH:ko02010], Transporters [BR:ko02000],	09131 09183	09130 09180
D|1136176.5.peg.488	1	552172	553200	+	1029	145.5	152	163.5	144.5	166	173	56	52	94.5	57	68.5	58.5	97.7113	106.358	115.057	106.19	109.759	112.956	84.8072	72.7369	123.574	87.4041	96.254	86.8391	99.9704	0.226534	0.11124	2.03645	0.0417057	0.0566406	Ferric iron ABC transporter%2C ATP-binding protein	NA	K02010	afuC, fbpC; iron(III) transport system ATP-binding protein [EC:7.2.2.7]	191	02010 02000	ABC transporters [PATH:ko02010], Transporters [BR:ko02000],	09131 09183	09130 09180
D|1136176.5.peg.987	1	1118931	1119608	+	678	324.5	304	292	292	318.5	335	125	128	157	86	113.5	155.5	218.334	212.715	206.113	215.329	210.261	218.731	189.302	179.045	206.394	131.873	159.951	232.07	198.343	0.22058	0.0995612	2.21552	0.0267243	0.0373183	Histidine ABC transporter%2C permease protein HisM (TC 3.A.1.3.1)	NA	K10023	aotM; arginine/ornithine transport system permease protein	208	02010 02000	ABC transporters [PATH:ko02010], Transporters [BR:ko02000],	09131 09183	09130 09180
D|1136176.5.peg.1878	1	2162951	2163913	+	963	724.5	726	753	687	794.5	831.5	229	336.5	373	286	371.5	295	487.883	507.997	531.519	506.613	524.991	542.582	346.801	469.993	490.351	438.554	525.15	441.682	484.51	0.191528	0.0804198	2.3816	0.0172375	0.0248731	Peptide transport system permease protein SapB	NA	K19227	sapB; cationic peptide transport system permease protein	231	02010 01503 02000	ABC transporters [PATH:ko02010], Cationic antimicrobial peptide (CAMP) resistance [PATH:ko01503], Transporters [BR:ko02000],	09131 09175 09183	09130 09160 09180
D|1136176.5.peg.487	1	550547	552172	+	1626	328.5	350	282.5	317.5	321	334	136	135	149.5	132	126.5	130.5	221.03	244.902	199.055	233.764	212.245	218.078	205.96	188.836	195.878	202.409	178.353	194.639	207.929	0.1893	0.0778568	2.43139	0.0150412	0.0218532	Ferric iron ABC transporter%2C permease protein	NA	K02011	afuB, fbpB; iron(III) transport system permease protein	373	02010 02000	ABC transporters [PATH:ko02010], Transporters [BR:ko02000],	09131 09183	09130 09180
D|1136176.5.peg.3981	2	1157668	1158507	-	840	385	355	357.5	382	377.5	372	161	154.5	189	154.5	156	150.5	259.44	248.401	251.995	281.697	249.272	242.889	243.821	215.413	248.462	236.144	220.818	224.584	243.578	0.14136	0.0704172	2.00747	0.0447002	0.0604246	Transmembrane component MtsC of energizing module of methionine-regulated ECF transporter	NA	K16785	ecfT; energy-coupling factor transport system permease protein	192	02010 02000	ABC transporters [PATH:ko02010], Transporters [BR:ko02000],	09131 09183	09130 09180
D|1136176.5.peg.4227	2	1445080	1445925	+	846	68	53	54	41	63	64	32.5	29.5	26.5	20.5	26.5	17	45.8233	37.0852	38.1169	30.2345	41.6555	41.7873	48.4613	40.5648	34.18	30.6681	36.803	25.4528	37.5694	0.122452	0.165444	0.740144	0.459213	0.508266	Hydroxymethylpyrimidine ABC transporter%2C transmembrane component	NA	K15599	thiX; putative hydroxymethylpyrimidine transport system permease protein	156	02010 02000	ABC transporters [PATH:ko02010], Transporters [BR:ko02000],	09131 09183	09130 09180
D|1136176.5.peg.1153	1	1309984	1311705	-	1722	744.5	695.5	658	677	743	772	291.5	371	335.5	315.5	291	277.5	501.36	486.306	464.461	499.238	491.27	504.06	440.695	518.95	440.396	483.022	411.91	414.731	471.367	0.121057	0.0608586	1.98916	0.0466839	0.06285	Transport ATP-binding protein CydC	NA	K16012	cydC; ATP-binding cassette, subfamily C, bacterial CydC	326	02010 02000	ABC transporters [PATH:ko02010], Transporters [BR:ko02000],	09131 09183	09130 09180
D|1136176.5.peg.4226	2	1444323	1445087	+	765	23	19.5	19	13	22.5	24	7.5	7.5	11.5	6	13	9.5	15.499	13.2947	13.4115	9.58656	14.5464	15.6702	10.6009	9.79151	14.4608	9.20043	18.4015	13.475	13.1615	0.109575	0.260808	0.420138	0.674385	0.717181	Hydroxymethylpyrimidine ABC transporter%2C ATPase component	NA	K15600	thiZ; putative hydroxymethylpyrimidine transport system ATP-binding protein	130	02010 02000	ABC transporters [PATH:ko02010], Transporters [BR:ko02000],	09131 09183	09130 09180
D|1136176.5.peg.1793	1	2074114	2075262	-	1149	249	198	179.5	207.5	206	211.5	108.5	65.5	98.5	98.5	93	91.5	167.794	138.545	126.35	152.647	136.207	137.768	163.557	90.9212	128.832	150.274	131.641	136.248	138.399	0.104115	0.118241	0.880528	0.378573	0.426435	Maltose/maltodextrin ABC transporter%2C substrate binding periplasmic protein MalE	NA	K15770	cycB, ganO; arabinogalactan oligomer / maltooligosaccharide transport system substrate-binding protein	10	02010 02000	ABC transporters [PATH:ko02010], Transporters [BR:ko02000],	09131 09183	09130 09180
D|1136176.5.peg.3332	2	426572	428335	-	1764	976.5	981.5	941	956	1033.5	1054.5	398.5	414	488.5	445	451	460.5	657.698	686.426	664.222	704.981	683.018	688.185	602.737	579.098	641.532	682.365	638.39	688.724	659.781	0.0924638	0.0501038	1.84545	0.0649728	0.0854401	ATP-binding protein of ABC transporter	NA	K18889	mdlA, smdA; ATP-binding cassette, subfamily B, multidrug efflux pump	265	02010 02000	ABC transporters [PATH:ko02010], Transporters [BR:ko02000],	09131 09183	09130 09180
D|1136176.5.peg.1547	1	1804965	1805924	-	960	48	38	43	42	46	42.5	29.5	24.5	19.5	13.5	14	17.5	32.3458	26.5894	30.3523	30.972	30.4151	27.4229	43.918	33.5709	24.9777	19.9343	19.817	25.4528	28.814	0.089775	0.184482	0.486632	0.626519	0.672907	Ferric hydroxamate ABC transporter (TC 3.A.1.14.3)%2C periplasmic substrate binding protein FhuD	NA	K23227	fhuD; ferric hydroxamate transport system substrate-binding protein	146	02010 02000	ABC transporters [PATH:ko02010], Transporters [BR:ko02000],	09131 09183	09130 09180
D|1136176.5.peg.2479	1	2838793	2839662	+	870	89	94	85.5	84	93.5	98	47.5	34	42.5	35	48.5	39.5	59.9745	65.7737	59.9988	61.9439	61.4914	63.9868	71.1775	47.5588	55.2138	53.6692	67.944	58.3918	60.5937	0.079025	0.125737	0.628496	0.529679	0.577447	Vitamin B12 ABC transporter%2C B12-binding component BtuF	NA	K06858	btuF; vitamin B12 transport system substrate-binding protein	128	02010 02000	ABC transporters [PATH:ko02010], Transporters [BR:ko02000],	09131 09183	09130 09180
D|1136176.5.peg.1502	1	1753005	1753673	-	669	70	58	57.5	66	51	62.5	27.5	32	29	20	31.5	26	47.171	40.5838	40.2345	48.6702	33.7211	40.4815	40.8892	44.7612	38.1238	30.6681	43.8805	38.9279	40.6761	0.0748521	0.154978	0.482986	0.629105	0.675372	Arginine ABC transporter%2C permease protein ArtM	NA	K09998	artM; arginine transport system permease protein	190	02010 02000	ABC transporters [PATH:ko02010], Transporters [BR:ko02000],	09131 09183	09130 09180
D|1136176.5.peg.3544	2	670340	671965	-	1626	1984	1984	2077	1905	2170	2208	883	1001	1072	874	939	894	1336.96	1388.25	1466.09	1404.8	1434.8	1441.66	1337.23	1400.19	1409.27	1340.2	1329.15	1338.52	1385.59	0.0545267	0.03722	1.46499	0.142925	0.17774	Oligopeptide ABC transporter%2C periplasmic oligopeptide-binding protein OppA (TC 3.A.1.5.1)	NA	K15580	oppA, mppA; oligopeptide transport system substrate-binding protein	359	02010 02024 01501 02000	ABC transporters [PATH:ko02010], Quorum sensing [PATH:ko02024], beta-Lactam resistance [PATH:ko01501], Transporters [BR:ko02000],	09131 09145 09175 09183	09130 09140 09160 09180
D|1136176.5.peg.4228	2	1446046	1447002	+	957	135.5	121.5	106	106	118.5	115.5	47.5	58	59.5	61	50.5	51	90.9726	84.6662	74.822	78.1673	78.0214	75.0866	71.1775	81.1297	77.5622	93.5377	70.775	76.3585	79.3564	0.0355778	0.112837	0.315304	0.752531	0.787299	Hydroxymethylpyrimidine ABC transporter%2C substrate-binding component	NA	K15598	thiY; putative hydroxymethylpyrimidine transport system substrate-binding protein	216	02010 02000	ABC transporters [PATH:ko02010], Transporters [BR:ko02000],	09131 09183	09130 09180
D|1136176.5.peg.3350	2	448386	449393	-	1008	40	40	46	30	48	41	20	20	18	20	17	19	26.9549	27.9888	32.4699	22.1228	31.7375	26.77	30.2883	27.9757	23.6631	30.6681	24.0635	28.4473	27.7625	0.0334466	0.181659	0.184118	0.853921	0.875034	Ferric iron ABC transporter%2C iron-binding protein	NA	K02012	afuA, fbpA; iron(III) transport system substrate-binding protein	198	02010 02000	ABC transporters [PATH:ko02010], Transporters [BR:ko02000],	09131 09183	09130 09180
D|1136176.5.peg.3063	2	140139	141725	+	1587	2080.5	2001	2095.5	2052.5	2186.5	2367	763.5	1033.5	1293	783	1191	1135.5	1401.65	1400.14	1478.79	1513.2	1445.38	1545.48	1155.5	1444.95	1699.8	1200.66	1685.86	1699.35	1472.56	-0.0170678	0.101868	-0.167548	0.866939	0.886221	ABC transporter protein	NA	K12541	lapB; ATP-binding cassette, subfamily C, bacterial LapB	24	02010 02000 02044	ABC transporters [PATH:ko02010], Transporters [BR:ko02000], Secretion system [BR:ko02044],	09131 09183	09130 09180
D|1136176.5.peg.327	1	366568	367293	-	726	1789.5	1808	1721	1608	1874	1817	803.5	906.5	1012	783	908.5	821.5	1205.56	1265.09	1214.8	1185.78	1239.09	1186.37	1216.08	1267.3	1330.39	1200.66	1285.27	1229.22	1235.47	-0.0464673	0.0382157	-1.21592	0.224015	0.266294	Lipopolysaccharide ABC transporter%2C ATP-binding protein LptB	NA	K06861	lptB; lipopolysaccharide export system ATP-binding protein [EC:3.6.3.-]	199	02010 02000	ABC transporters [PATH:ko02010], Transporters [BR:ko02000],	09131 09183	09130 09180
D|1136176.5.peg.2954	1	3397064	3397735	-	672	118	122.5	131.5	104.5	138.5	138.5	53.5	68.5	84.5	52.5	47	67.5	79.5168	85.3659	92.4687	76.6925	91.2454	90.1039	80.264	95.1175	110.428	79.737	66.5285	100.314	87.3152	-0.0500119	0.116965	-0.42758	0.668957	0.712388	Amino acid ABC transporter%2C permease protein	NA	K16962	yxeN; putative S-methylcysteine transport system permease protein	231	02010 02000	ABC transporters [PATH:ko02010], Transporters [BR:ko02000],	09131 09183	09130 09180
D|1136176.5.peg.355	1	389666	390766	+	1101	1040	1011.5	1003	964.5	1059	1109.5	544.5	546.5	510.5	456.5	493	505.5	700.826	707.418	707.986	710.88	700.209	724.096	823.842	763.738	670.453	699.232	697.841	756.099	721.885	-0.0518837	0.0508245	-1.02084	0.30733	0.354089	D000988: Predicted permease	NA	K07091	lptF; lipopolysaccharide export system permease protein	191	02010 02000	ABC transporters [PATH:ko02010], Transporters [BR:ko02000],	09131 09183	09130 09180
D|1136176.5.peg.3801	2	949495	951609	-	2115	3567.5	3449.5	3512	3375	3686	3840.5	1702.5	1809	2031.5	1480.5	1854.5	1755	2403.7	2413.34	2479.01	2488.82	2437.18	2507.24	2577.53	2530.41	2669.98	2269.44	2624.34	2627.63	2502.38	-0.0553293	0.0403994	-1.36956	0.170825	0.208403	Type I secretion system ATPase%2C LssB family LapB	NA	K12541	lapB; ATP-binding cassette, subfamily C, bacterial LapB	481	02010 02000 02044	ABC transporters [PATH:ko02010], Transporters [BR:ko02000], Secretion system [BR:ko02044],	09131 09183	09130 09180
D|1136176.5.peg.1209	1	1408344	1409174	-	831	313.5	263.5	241.5	247	303.5	274.5	101.5	154.5	145	121	166	135	210.922	184.027	170.114	182.145	200.343	178.902	152.956	215.413	190.619	185.542	234.973	202.125	192.34	-0.070392	0.0955973	-0.736338	0.461525	0.510581	Phosphonate ABC transporter permease protein phnE1 (TC 3.A.1.9.1)	NA	K02042	phnE; phosphonate transport system permease protein	164	02010 02000	ABC transporters [PATH:ko02010], Transporters [BR:ko02000],	09131 09183	09130 09180
D|1136176.5.peg.4171	2	1385792	1386607	-	816	82	75	76	77	86	74	31	34	43	61	29	37	55.2574	52.479	53.646	56.7819	56.863	48.3166	46.9469	47.5588	56.5284	93.5377	41.0495	55.3973	55.3635	-0.0714334	0.156929	-0.455194	0.648969	0.692692	Phosphate ABC transporter%2C periplasmic phosphate-binding protein PstS (TC 3.A.1.7.1)	NA	K02040	pstS; phosphate transport system substrate-binding protein	113	02010 02020 05152 02000	ABC transporters [PATH:ko02010], Two-component system [PATH:ko02020], Tuberculosis [PATH:ko05152], Transporters [BR:ko02000],	09131 09132 09171 09183	09130 09160 09180
D|1136176.5.peg.922	1	1041131	1042051	+	921	222	225.5	211	174	237	246.5	84.5	108.5	137	73	114.5	147	149.599	157.437	148.938	128.312	156.704	160.62	127.211	151.069	180.102	111.939	161.367	220.092	154.449	-0.0793622	0.132336	-0.599702	0.548705	0.596927	Oligopeptide transport system permease protein OppB (TC 3.A.1.5.1)	NA	K15581	oppB; oligopeptide transport system permease protein	244	02010 02024 01501 02000	ABC transporters [PATH:ko02010], Quorum sensing [PATH:ko02024], beta-Lactam resistance [PATH:ko01501], Transporters [BR:ko02000],	09131 09145 09175 09183	09130 09140 09160 09180
D|1136176.5.peg.4459	2	1703690	1704448	+	759	2868	2799	2777	2722.5	2951	2909	1514.5	1547.5	1447	1590.5	1257	1361	1932.66	1958.52	1960.2	2007.28	1951.2	1899.36	2292.82	2163.92	1902.25	2438.11	1779.28	2037.72	2026.94	-0.106905	0.0705934	-1.51438	0.12993	0.163098	Molybdenum ABC transporter%2C periplasmic molybdenum-binding protein ModA (TC 3.A.1.8.1)	NA	K02020	modA; molybdate transport system substrate-binding protein	95	02010 02000	ABC transporters [PATH:ko02010], Transporters [BR:ko02000],	09131 09183	09130 09180
D|1136176.5.peg.2132	1	2442097	2442714	-	618	115.5	111	118	104.5	117.5	113	51.5	68.5	67.5	45.5	66.5	53	77.4952	77.669	83.2924	76.6925	77.3602	73.7808	77.2352	95.1175	88.0792	69.0032	93.423	79.353	80.7084	-0.113001	0.109374	-1.03316	0.301531	0.348186	ABC transporter involved in cytochrome c biogenesis%2C ATPase component CcmA	NA	K02193	ccmA; heme exporter protein A [EC:7.6.2.5]	131	02010 02000	ABC transporters [PATH:ko02010], Transporters [BR:ko02000],	09131 09183	09130 09180
D|1136176.5.peg.1154	1	1311698	1313482	-	1785	275.5	256.5	264	241	253	277	125.5	154	137.5	118.5	119	155.5	185.315	179.128	186.349	177.72	167.283	180.861	189.302	215.413	180.102	180.942	168.444	232.07	186.911	-0.114359	0.0823523	-1.38865	0.164938	0.20191	Transport ATP-binding protein CydD	NA	K16013	cydD; ATP-binding cassette, subfamily C, bacterial CydD	354	02010 02000	ABC transporters [PATH:ko02010], Transporters [BR:ko02000],	09131 09183	09130 09180
D|1136176.5.peg.3364	2	466989	468026	-	1038	639.5	671.5	635	678	668	728.5	296.5	364	363	381	369	313	430.604	469.513	448.226	499.976	441.68	475.331	448.267	509.159	477.205	584.227	522.319	468.632	481.262	-0.122103	0.0682826	-1.78821	0.0737426	0.0961824	putative putrescine-binding periplasmic protein	NA	K11069	potD; spermidine/putrescine transport system substrate-binding protein	56	02010 02000	ABC transporters [PATH:ko02010], Transporters [BR:ko02000],	09131 09183	09130 09180
D|1136176.5.peg.90	1	114611	115288	+	678	659	693	680.5	643	687	771	334.5	355.5	392	342	403	336	444.081	484.906	479.99	474.166	454.243	503.407	505.815	496.57	515.329	524.424	570.446	503.068	496.37	-0.1335	0.0549046	-2.4315	0.0150365	0.0218532	Cell division transporter%2C ATP-binding protein FtsE (TC 3.A.5.1.1)	NA	K09812	ftsE; cell division transport system ATP-binding protein	162	02010 03036 02000	ABC transporters [PATH:ko02010], Chromosome and associated proteins [BR:ko03036], Transporters [BR:ko02000],	09131 09182 09183	09130 09180
D|1136176.5.peg.1408	1	1655224	1656339	+	1116	5578	5508	5336	4757.5	5568.5	5895	2276.5	2989	3311	2653	3015.5	2867	3758.85	3854.06	3766.51	3507.94	3681.55	3849	3446.81	4180.98	4352.69	4068.12	4267.73	4292.55	3918.9	-0.134719	0.0570896	-2.35978	0.0182857	0.0262225	Putrescine transport ATP-binding protein PotA (TC 3.A.1.11.1)	NA	K11072	potA; spermidine/putrescine transport system ATP-binding protein [EC:7.6.2.11]	284	02010 02000	ABC transporters [PATH:ko02010], Transporters [BR:ko02000],	09131 09183	09130 09180
D|1136176.5.peg.4460	2	1704449	1705147	+	699	1964.5	1919	1852.5	1822	2014.5	2048.5	1061	1036.5	1093.5	1068.5	985.5	870	1323.48	1342.76	1307.27	1343.59	1331.65	1337.19	1606.79	1449.14	1436.87	1637.68	1394.27	1302.59	1401.11	-0.143945	0.0540134	-2.665	0.00769891	0.0116109	Molybdenum transport system permease protein ModB (TC 3.A.1.8.1)	NA	K02018	modB; molybdate transport system permease protein	208	02010 02000	ABC transporters [PATH:ko02010], Transporters [BR:ko02000],	09131 09183	09130 09180
D|1136176.5.peg.2387	1	2718052	2718870	-	819	793.5	748.5	725.5	660.5	739.5	766	406	358	394	405.5	410	373.5	534.38	523.391	511.754	486.702	488.625	500.142	614.853	500.766	517.958	621.029	580.355	558.465	536.535	-0.154118	0.0611304	-2.52114	0.0116976	0.0172436	Phosphate transport ATP-binding protein PstB (TC 3.A.1.7.1)	NA	K02036	pstB; phosphate transport system ATP-binding protein [EC:7.3.2.1]	221	02010 02000	ABC transporters [PATH:ko02010], Transporters [BR:ko02000],	09131 09183	09130 09180
D|1136176.5.peg.1330	1	1577815	1578579	-	765	4192	3983.5	3892.5	3865	4271	4302.5	1867.5	2200.5	2644.5	1819	2474.5	2210.5	2824.87	2786.99	2747.24	2850.16	2823.98	2808.89	2827.41	3077.33	3475.84	2789.26	3501.95	3308.87	2985.23	-0.172869	0.0615982	-2.80639	0.00500998	0.00772379	ABC-type polar amino acid transport system%2C ATPase component	NA	K09972	aapP, bztD; general L-amino acid transport system ATP-binding protein [EC:7.4.2.1]	205	02010 02000	ABC transporters [PATH:ko02010], Transporters [BR:ko02000],	09131 09183	09130 09180
D|1136176.5.peg.2388	1	2718871	2720580	-	1710	3167.5	2959.5	2948.5	2862.5	3180.5	3301	1659	1781	1828	1702.5	1603	1417.5	2134.15	2070.47	2080.9	2110.52	2102.61	2155.31	2512.41	2491.24	2403.11	2609.85	2269.05	2121.57	2255.1	-0.187033	0.0487914	-3.83333	0.000126	0.000237	Phosphate transport system permease protein PstA (TC 3.A.1.7.1)	NA	K02038	pstA; phosphate transport system permease protein	301	02010 02000	ABC transporters [PATH:ko02010], Transporters [BR:ko02000],	09131 09183	09130 09180
D|1136176.5.peg.1433	1	1685569	1686267	+	699	2164.5	2101.5	2115	1964	2229.5	2198	973	1054.5	1448.5	1112	1185	1224.5	1458.26	1470.11	1492.91	1448.31	1473.81	1435.13	1473.53	1474.32	1903.56	1705.15	1677.37	1832.6	1570.42	-0.197852	0.0650754	-3.04035	0.00236306	0.00379824	ABC-type tungstate transport system%2C permease protein	NA	K05773	tupB, vupB; tungstate transport system permease protein	138	02010 02000	ABC transporters [PATH:ko02010], Transporters [BR:ko02000],	09131 09183	09130 09180
D|1136176.5.peg.3064	2	141722	143860	+	2139	4545	4366	4532	4284	4726	5149	1829	2643.5	3302	1800	3071.5	2658.5	3062.75	3054.98	3198.99	3159.14	3124.82	3361.92	2769.87	3697	4340.86	2760.13	4347	3979.63	3404.76	-0.207618	0.11676	-1.77816	0.0753781	0.0980676	D01200333: hypothetical protein	NA	K12541	lapB; ATP-binding cassette, subfamily C, bacterial LapB	123	02010 02000 02044	ABC transporters [PATH:ko02010], Transporters [BR:ko02000], Secretion system [BR:ko02044],	09131 09183	09130 09180
D|1136176.5.peg.1331	1	1578602	1579699	-	1098	4133.5	3918.5	3727	3598	4136	4318.5	1766.5	2375.5	2728.5	1837	2273	2298	2785.11	2741.51	2630.77	2653.26	2734.72	2819.34	2674.46	3322.12	3586.27	2816.86	3217.43	3440.62	2951.87	-0.220122	0.0705894	-3.11835	0.00181869	0.00295911	Glutamate Aspartate transport system permease protein GltK (TC 3.A.1.3.4)	NA	K09971	aapM, bztC; general L-amino acid transport system permease protein	259	02010 02000	ABC transporters [PATH:ko02010], Transporters [BR:ko02000],	09131 09183	09130 09180
D|1136176.5.peg.486	1	549287	550300	+	1014	346	342	326	309	365	363	203	194	207	166	201	189	233.159	239.304	230.113	227.865	241.337	237.013	307.426	271.365	272.125	254.545	284.515	282.976	256.812	-0.246908	0.0650419	-3.79613	0.000147	0.000273	Ferric iron ABC transporter%2C iron-binding protein	NA	K02012	afuA, fbpA; iron(III) transport system substrate-binding protein	245	02010 02000	ABC transporters [PATH:ko02010], Transporters [BR:ko02000],	09131 09183	09130 09180
D|1136176.5.peg.2389	1	2720704	2722920	-	2217	1379	1260	1348	1315	1451	1497	728	870	866	773	756	714	929.269	881.648	951.51	969.717	959.399	977.432	1102.49	1216.95	1138.46	1185.32	1070.12	1069.02	1037.61	-0.25883	0.0466163	-5.55236	2.82e-08	7.28e-08	Phosphate transport system permease protein PstC (TC 3.A.1.7.1)	NA	K02037	pstC; phosphate transport system permease protein	348	02010 02000	ABC transporters [PATH:ko02010], Transporters [BR:ko02000],	09131 09183	09130 09180
D|1136176.5.peg.4461	2	1705144	1706250	+	1107	1189.5	1175	1157.5	1083.5	1268.5	1238.5	753.5	714	723.5	574	648.5	672	801.233	822.172	816.689	798.634	838.399	808.324	1140.35	998.734	950.466	880.174	917.244	1006.14	898.213	-0.270042	0.0574868	-4.69747	2.63e-06	5.76e-06	Molybdenum transport ATP-binding protein ModC (TC 3.A.1.8.1)	NA	K02017	modC; molybdate transport system ATP-binding protein [EC:7.3.2.5]	181	02010 02000	ABC transporters [PATH:ko02010], Transporters [BR:ko02000],	09131 09183	09130 09180
D|1136176.5.peg.3347	2	443776	445500	-	1725	173.5	173	152	155.5	166	182	91.5	98	99.5	90.5	96.5	107	116.58	121.052	107.292	114.301	109.759	118.833	137.812	137.081	130.147	138.006	135.888	160.203	127.246	-0.284509	0.0886332	-3.20996	0.00132752	0.0022119	Ferric iron ABC transporter%2C permease protein	NA	K02011	afuB, fbpB; iron(III) transport system permease protein	281	02010 02000	ABC transporters [PATH:ko02010], Transporters [BR:ko02000],	09131 09183	09130 09180
D|1136176.5.peg.3846	2	1009163	1010434	+	1272	398.5	392.5	382	356	447	393	231.5	209	251	203	215.5	270.5	268.201	274.29	269.642	262.524	295.556	256.6	349.83	292.347	329.968	311.281	304.332	404.251	301.569	-0.290603	0.0783975	-3.70679	0.00021	0.000384	L-proline glycine betaine ABC transport system permease protein ProV (TC 3.A.1.12.1)	NA	K02000	proV; glycine betaine/proline transport system ATP-binding protein [EC:7.6.2.9]	202	02010 02000	ABC transporters [PATH:ko02010], Transporters [BR:ko02000],	09131 09183	09130 09180
D|1136176.5.peg.3132	2	221143	222165	-	1023	362	337.5	324	320.5	340	355	176	187.5	247	145	238	202	243.941	235.806	228.701	235.977	224.807	231.789	266.537	261.573	324.71	222.344	336.889	302.44	259.626	-0.294165	0.0881926	-3.33549	0.000851	0.00145585	Oligopeptide transport system permease protein OppC (TC 3.A.1.5.1)	NA	K13895	yejE; microcin C transport system permease protein	321	02010 02000	ABC transporters [PATH:ko02010], Transporters [BR:ko02000],	09131 09183	09130 09180
D|1136176.5.peg.3131	2	219484	221133	-	1650	779	750.5	741	700.5	752	782	351	427.5	535	352	497	490	524.946	524.79	523.048	516.199	497.221	510.589	531.56	597.282	703.319	539.758	703.503	733.641	575.488	-0.299875	0.0826264	-3.62929	0.000284	0.000512	Oligopeptide transport ATP-binding protein OppF (TC 3.A.1.5.1)	NA	K13896	yejF; microcin C transport system ATP-binding protein	316	02010 02000	ABC transporters [PATH:ko02010], Transporters [BR:ko02000],	09131 09183	09130 09180
D|1136176.5.peg.803	1	898493	899278	-	786	195.5	187	192.5	170.5	172	203.5	95	102	115	101	122.5	127	131.405	130.848	135.527	125.363	113.726	132.544	143.869	142.676	151.181	154.874	172.691	190.148	143.738	-0.311568	0.090388	-3.44701	0.000567	0.000988	Zinc ABC transporter%2C inner membrane permease protein ZnuB	NA	K09816	znuB; zinc transport system permease protein	214	02010 02000	ABC transporters [PATH:ko02010], Transporters [BR:ko02000],	09131 09183	09130 09180
D|1136176.5.peg.1656	1	1921654	1922412	-	759	57	60.5	58	57	61	71.5	30.5	38	47.5	25	42	39.5	38.4107	41.9832	40.9404	42.0334	40.3331	46.3578	45.4325	53.1539	61.7869	38.3351	59.451	58.3918	47.2175	-0.34703	0.140767	-2.46527	0.0136909	0.0200167	Vitamin B12 ABC transporter%2C ATPase component BtuD	NA	K06074	btuD; vitamin B12 transport system ATP-binding protein [EC:7.6.2.8]	108	02010 02000	ABC transporters [PATH:ko02010], Transporters [BR:ko02000],	09131 09183	09130 09180
D|1136176.5.peg.356	1	390770	391840	+	1071	889	823.5	852	762.5	883	925.5	501.5	477.5	565.5	495.5	564	526.5	599.072	575.87	601.4	561.92	583.838	603.957	758.722	667.222	742.757	759.035	798.342	787.541	669.973	-0.355129	0.0500843	-7.09063	1.34e-12	4.52e-12	D000906: Predicted Permease	NA	K11720	lptG; lipopolysaccharide export system permease protein	221	02010 02000	ABC transporters [PATH:ko02010], Transporters [BR:ko02000],	09131 09183	09130 09180
D|1136176.5.peg.1548	1	1805921	1806700	-	780	96.5	99	91	86	112	106.5	60.5	56.5	52	67.5	75	50	64.6916	69.2723	64.234	63.4188	74.0542	69.2103	90.8649	78.3321	68.3599	102.738	106.162	74.8613	77.1833	-0.358734	0.118897	-3.01718	0.00255142	0.00408544	Ferric hydroxamate ABC transporter (TC 3.A.1.14.3)%2C ATP-binding protein FhuC	NA	K10829	fhuC; ferric hydroxamate transport system ATP-binding protein [EC:7.2.2.16]	157	02010 02000	ABC transporters [PATH:ko02010], Transporters [BR:ko02000],	09131 09183	09130 09180
D|1136176.5.peg.3348	2	445507	446616	-	1110	293.5	263	273	256.5	286	273	148.5	183	193.5	170.5	137.5	177	197.444	184.027	192.702	188.781	189.103	178.249	224.133	255.978	253.721	260.679	193.923	265.009	215.312	-0.362692	0.07874	-4.60619	4.1e-06	8.86e-06	Ferric iron ABC transporter%2C ATP-binding protein	NA	K02010	afuC, fbpC; iron(III) transport system ATP-binding protein [EC:7.2.2.7]	177	02010 02000	ABC transporters [PATH:ko02010], Transporters [BR:ko02000],	09131 09183	09130 09180
D|1136176.5.peg.4017	2	1203966	1205078	-	1113	2046	2046	2044	1874	2171	2115	1282	1171	1429	1304	1232	1254	1378.74	1431.63	1442.79	1381.94	1435.46	1380.94	1941.48	1637.98	1878.58	1999.56	1743.9	1877.52	1627.54	-0.38998	0.0493108	-7.90861	2.6e-15	1.05e-14	Maltose/maltodextrin transport ATP-binding protein MalK (EC 3.6.3.19)	KEGG_ENZYME:3.6.3.19	K10111	malK, mtlK, thuK; multiple sugar transport system ATP-binding protein [EC:3.6.3.-]	283	02010 02000	ABC transporters [PATH:ko02010], Transporters [BR:ko02000],	09131 09183	09130 09180
D|1136176.5.peg.4003	2	1187724	1188545	+	822	207	178	183	201	238	221	133	148	127	137	112	114	139.491	124.55	129.174	148.223	157.365	144.297	201.417	207.021	166.956	210.076	158.536	170.684	163.149	-0.399933	0.0948557	-4.21623	2.48e-05	4.98e-05	Phosphate ABC transporter%2C periplasmic phosphate-binding protein PstS (TC 3.A.1.7.1)	NA	K02040	pstS; phosphate transport system substrate-binding protein	154	02010 02020 05152 02000	ABC transporters [PATH:ko02010], Two-component system [PATH:ko02020], Tuberculosis [PATH:ko05152], Transporters [BR:ko02000],	09131 09132 09171 09183	09130 09160 09180
D|1136176.5.peg.1877	1	2161329	2162951	+	1623	1417	1348	1360	1219.5	1521	1563	773	919	1044.5	834.5	930	901.5	954.876	943.223	959.981	898.924	1005.68	1020.52	1170.64	1285.49	1372.46	1278.86	1316.41	1349	1129.67	-0.426751	0.0492423	-8.66636	4.46e-18	2.11e-17	Peptide transport periplasmic protein SapA	NA	K19226	sapA; cationic peptide transport system substrate-binding protein	261	02010 01503 02000	ABC transporters [PATH:ko02010], Cationic antimicrobial peptide (CAMP) resistance [PATH:ko01503], Transporters [BR:ko02000],	09131 09175 09183	09130 09160 09180
D|1136176.5.peg.1504	1	1754358	1755089	-	732	64	57.5	59	47.5	56.5	57.5	33	34	46	23.5	57.5	28	43.1278	39.8841	41.6462	34.6591	37.0271	37.2168	49.9757	47.5588	60.4723	35.2683	80.6835	41.9223	45.7868	-0.442812	0.164133	-2.69789	0.00697814	0.0105823	Arginine ABC transporter%2C periplasmic arginine-binding protein ArtI	NA	K09997	artI; arginine transport system substrate-binding protein	161	02010 02000	ABC transporters [PATH:ko02010], Transporters [BR:ko02000],	09131 09183	09130 09180
D|1136176.5.peg.1434	1	1686278	1686997	+	720	924.5	885.5	923	883.5	986.5	1017.5	542.5	663	642	560	628	614	622.657	619.253	651.516	651.148	651.941	664.027	820.813	927.396	843.982	858.707	888.934	919.297	759.973	-0.446061	0.0453349	-9.83924	7.63e-23	4.47e-22	ABC-type tungstate transport system%2C ATP-binding protein	NA	K06857	tupC, vupC; tungstate transport system ATP-binding protein [EC:7.3.2.6]	111	02010 02000	ABC transporters [PATH:ko02010], Transporters [BR:ko02000],	09131 09183	09130 09180
D|1136176.5.peg.1721	1	1986830	1987633	+	804	212	192	181	186	190	209	132	145	129	109	140	125	142.861	134.346	127.762	137.161	125.628	136.462	199.903	202.824	169.585	167.141	198.17	187.153	160.75	-0.483732	0.0819287	-5.90431	3.54e-09	9.76e-09	Methionine ABC transporter substrate-binding protein	NA	K02073	metQ; D-methionine transport system substrate-binding protein	134	02010 02000	ABC transporters [PATH:ko02010], Transporters [BR:ko02000],	09131 09183	09130 09180
D|1136176.5.peg.805	1	900144	901028	+	885	469	499	502	469	476	548	360	350	340	221	296	426	316.046	349.161	354.346	345.853	314.73	357.804	545.189	489.576	446.969	338.882	418.988	637.818	409.614	-0.497484	0.122917	-4.04731	5.18e-05	0.000101	Zinc ABC transporter%2C periplasmic-binding protein ZnuA	NA	K09815	znuA; zinc transport system substrate-binding protein	153	02010 02000	ABC transporters [PATH:ko02010], Transporters [BR:ko02000],	09131 09183	09130 09180
D|1136176.5.peg.3140	2	229545	230537	+	993	3056	2966.5	3061.5	2914	3221	3325.5	2033	2148	2453.5	1911	2236.5	1896	2059.35	2075.37	2160.66	2148.86	2129.72	2170.98	3078.81	3004.6	3224.75	2930.34	3165.06	2838.74	2582.27	-0.51792	0.0373233	-13.8766	8.78e-44	1.1e-42	Ribose ABC transport system%2C permease protein RbsC (TC 3.A.1.2.1)	NA	K10440	rbsC; ribose transport system permease protein	350	02010 02000	ABC transporters [PATH:ko02010], Transporters [BR:ko02000],	09131 09183	09130 09180
D|1136176.5.peg.3505	2	623055	623882	-	828	751	640.5	567	592	552.5	640.5	356.5	420.5	555.5	360	463.5	467	506.077	447.821	400.227	436.557	364.981	417.873	539.132	587.491	729.611	552.026	655.376	699.204	528.031	-0.549105	0.0977234	-5.61897	1.92e-08	5.03e-08	Phosphonate ABC transporter permease protein phnE2 (TC 3.A.1.9.1)	NA	K02042	phnE; phosphonate transport system permease protein	159	02010 02000	ABC transporters [PATH:ko02010], Transporters [BR:ko02000],	09131 09183	09130 09180
D|1136176.5.peg.3464	2	576469	577311	+	843	127.5	120.5	102	100	138.5	103.5	96.5	95.5	83.5	72.5	64.5	77	85.5817	83.9665	71.9986	73.7427	91.2454	67.2515	145.384	132.885	109.113	110.405	90.592	115.286	98.1209	-0.568175	0.120886	-4.70008	2.6e-06	5.69e-06	Glycerol-3-phosphate ABC transporter%2C permease protein UgpE (TC 3.A.1.1.3)	NA	K05815	ugpE; sn-glycerol 3-phosphate transport system permease protein	251	02010 02000	ABC transporters [PATH:ko02010], Transporters [BR:ko02000],	09131 09183	09130 09180
D|1136176.5.peg.804	1	899278	900060	-	783	1072.5	1039	1071.5	1034.5	1107	1160.5	768	906	838	685	775.5	727	722.39	727.01	755.985	762.5	731.946	757.395	1163.07	1267.3	1101.65	1050.38	1097.01	1088.48	935.427	-0.603133	0.0492582	-12.2443	1.8e-34	1.64e-33	Zinc ABC transporter%2C ATP-binding protein ZnuC	NA	K09817	znuC; zinc transport system ATP-binding protein [EC:7.2.2.20]	142	02010 02000	ABC transporters [PATH:ko02010], Transporters [BR:ko02000],	09131 09183	09130 09180
D|1136176.5.peg.2053	1	2339390	2340151	+	762	555	542	488	470	545	547	275	437	424	316	444	410	373.999	379.249	344.464	346.591	360.353	357.151	416.464	611.27	557.396	484.556	628.482	613.862	456.153	-0.616434	0.0935906	-6.58649	4.5e-11	1.39e-10	Lysine-arginine-ornithine-binding periplasmic protein precursor (TC 3.A.1.3.1)	NA	K10022	aotJ; arginine/ornithine transport system substrate-binding protein	124	02010 02000	ABC transporters [PATH:ko02010], Transporters [BR:ko02000],	09131 09183	09130 09180
D|1136176.5.peg.3463	2	575501	576382	+	882	21	26	20	22	23	39	22	26	18	21	7	19	14.1513	18.1927	14.1174	16.2234	15.2076	25.4642	33.3171	36.3685	23.6631	32.2015	9.9085	28.4473	22.2719	-0.656882	0.240389	-2.73258	0.00628407	0.00960509	Glycerol-3-phosphate ABC transporter%2C permease protein UgpA (TC 3.A.1.1.3)	NA	K05814	ugpA; sn-glycerol 3-phosphate transport system permease protein	208	02010 02000	ABC transporters [PATH:ko02010], Transporters [BR:ko02000],	09131 09183	09130 09180
D|1136176.5.peg.1332	1	1579701	1580906	-	1206	5096.5	5045	5049.5	4666	5338	5472	3367	4146	4634	3237	3991.5	3909.5	3434.05	3530.09	3563.93	3440.84	3529.48	3572.82	5099.04	5799.37	6091.92	4963.63	5649.26	5852.65	4543.92	-0.667261	0.0526874	-12.6645	9.3e-37	9.26e-36	Glutamate Aspartate transport system permease protein GltJ (TC 3.A.1.3.4)	NA	K09970	aapQ, bztB; general L-amino acid transport system permease protein	252	02010 02000	ABC transporters [PATH:ko02010], Transporters [BR:ko02000],	09131 09183	09130 09180
D|1136176.5.peg.921	1	1039396	1041027	+	1632	3413	3562	3394	3027	3617	3608	2393	2692	2965	2003	2984	2617	2299.92	2492.4	2395.72	2232.19	2391.55	2355.76	3624	3765.54	3897.83	3071.41	4223.85	3918.24	3055.7	-0.667601	0.06838	-9.7631	1.62e-22	9.41e-22	Oligopeptide ABC transporter%2C periplasmic oligopeptide-binding protein OppA (TC 3.A.1.5.1)	NA	K15580	oppA, mppA; oligopeptide transport system substrate-binding protein	487	02010 02024 01501 02000	ABC transporters [PATH:ko02010], Quorum sensing [PATH:ko02024], beta-Lactam resistance [PATH:ko01501], Transporters [BR:ko02000],	09131 09145 09175 09183	09130 09140 09160 09180
D|1136176.5.peg.3845	2	1008303	1009160	+	858	191.5	165.5	148	148	165	149	139.5	127	121	117	98.5	131.5	128.709	115.454	104.468	109.139	109.098	97.2861	210.504	177.646	159.068	179.408	138.719	196.137	143.803	-0.673495	0.105516	-6.38286	1.74e-10	5.16e-10	L-proline glycine betaine ABC transport system permease protein ProW (TC 3.A.1.12.1)	NA	K02001	proW; glycine betaine/proline transport system permease protein	261	02010 02000	ABC transporters [PATH:ko02010], Transporters [BR:ko02000],	09131 09183	09130 09180
D|1136176.5.peg.3506	2	623870	624640	-	771	708	573.5	541.5	518.5	548.5	642.5	318.5	448	596.5	365.5	449.5	527.5	477.101	400.94	381.875	381.987	362.337	419.179	481.584	626.657	783.51	559.693	635.559	789.038	524.955	-0.678182	0.119457	-5.67719	1.37e-08	3.61e-08	Phosphonate ABC transporter ATP-binding protein (TC 3.A.1.9.1)	NA	K02041	phnC; phosphonate transport system ATP-binding protein [EC:7.3.2.2]	187	02010 02000	ABC transporters [PATH:ko02010], Transporters [BR:ko02000],	09131 09183	09130 09180
D|1136176.5.peg.1843	1	2128264	2129271	-	1008	1394.5	1304.5	1280.5	1287.5	1485	1360.5	938	1128	1214.5	692.5	1160	1106.5	939.377	912.436	903.511	949.069	981.879	887.981	1420.52	1577.83	1595.94	1061.12	1641.98	1655.93	1210.63	-0.684105	0.0958822	-7.13485	9.69e-13	3.32e-12	L-proline glycine betaine binding ABC transporter protein ProX (TC 3.A.1.12.1)	NA	K02002	proX; glycine betaine/proline transport system substrate-binding protein	232	02010 02000	ABC transporters [PATH:ko02010], Transporters [BR:ko02000],	09131 09183	09130 09180
D|1136176.5.peg.3134	2	223296	225191	-	1896	2375.5	2107.5	2161.5	2066.5	2310	2362	1601	1837.5	2069.5	1473.5	1971.5	1665.5	1600.44	1474.31	1525.38	1523.53	1527.37	1542.21	2424.58	2569.57	2719.94	2258.7	2789.95	2492.88	2037.41	-0.731257	0.0524165	-13.9509	3.11e-44	3.97e-43	ABC transporter%2C periplasmic substrate-binding protein	NA	K13893	yejA; microcin C transport system substrate-binding protein	408	02010 02000	ABC transporters [PATH:ko02010], Transporters [BR:ko02000],	09131 09183	09130 09180
D|1136176.5.peg.3844	2	1007269	1008246	+	978	546	484	509	521	567	512	483	412	435	378	405	428	367.934	338.665	359.287	384.2	374.899	334.299	731.463	576.3	571.857	579.627	573.277	640.813	486.052	-0.765625	0.0722717	-10.5937	3.19e-26	2.13e-25	L-proline glycine betaine binding ABC transporter protein ProX (TC 3.A.1.12.1)	NA	K02002	proX; glycine betaine/proline transport system substrate-binding protein	195	02010 02000	ABC transporters [PATH:ko02010], Transporters [BR:ko02000],	09131 09183	09130 09180
D|1136176.5.peg.3133	2	222197	223285	-	1089	751.5	747.5	711.5	660.5	743	786	493	597.5	683.5	518.5	680.5	610.5	506.077	522.691	501.872	486.702	491.27	513.201	746.607	835.076	897.882	794.304	962.54	913.308	680.961	-0.76996	0.0624035	-12.3384	5.63e-35	5.2e-34	Oligopeptide transport system permease protein OppB (TC 3.A.1.5.1)	NA	K13894	yejB; microcin C transport system permease protein	261	02010 02000	ABC transporters [PATH:ko02010], Transporters [BR:ko02000],	09131 09183	09130 09180
D|1136176.5.peg.3139	2	228043	229548	+	1506	3811	3716.5	3822.5	3550	4008	4028.5	3279	3399	3362.5	3086	3426.5	3019	2568.12	2600.16	2697.83	2617.87	2650.08	2629.99	4965.77	4754.48	4419.73	4732.09	4849.5	4520.12	3667.15	-0.840931	0.0339957	-24.7364	4.35e-135	3.88e-133	Ribose ABC transport system%2C ATP-binding protein RbsA (TC 3.A.1.2.1)	NA	K10441	rbsA; ribose transport system ATP-binding protein [EC:7.5.2.7]	388	02010 02000	ABC transporters [PATH:ko02010], Transporters [BR:ko02000],	09131 09183	09130 09180
D|1136176.5.peg.3141	2	230659	231537	+	879	6275	6293	6182	5862	6345	6547	5500	5193	5949	5321	5478	5563	4228.54	4403.34	4363.68	4322.8	4195.3	4274.71	8329.28	7263.9	7820.64	8159.25	7754.11	8329.07	6120.39	-0.885781	0.0382544	-23.155	1.29e-118	8.97e-117	Ribose ABC transport system%2C periplasmic ribose-binding protein RbsB (TC 3.A.1.2.1)	NA	K10439	rbsB; ribose transport system substrate-binding protein	232	02010 02030 02000	ABC transporters [PATH:ko02010], Bacterial chemotaxis [PATH:ko02030], Transporters [BR:ko02000],	09131 09142 09183	09130 09140 09180
D|1136176.5.peg.583	1	667568	668650	-	1083	4549	4527	4522	4180	4880	4905	3961	4198	4679	3594	4379	4051	3065.44	3167.64	3191.94	3082.45	3226.65	3202.61	5998.6	5872.11	6151.08	5511.06	6198.47	6065.26	4561.11	-0.9188	0.0341041	-26.941	7.26e-160	9.11e-158	Maltose/maltodextrin transport ATP-binding protein MalK (EC 3.6.3.19)	KEGG_ENZYME:3.6.3.19	K10111	malK, mtlK, thuK; multiple sugar transport system ATP-binding protein [EC:3.6.3.-]	185	02010 02000	ABC transporters [PATH:ko02010], Transporters [BR:ko02000],	09131 09183	09130 09180
D|1136176.5.peg.985	1	1117339	1118109	+	771	2089	2159	1968	1856	2131	2196	1828	2092	2318	1374	2039	1921	1407.72	1510.7	1389.15	1368.67	1409.01	1433.83	2768.35	2926.26	3047.28	2106.9	2886.2	2876.17	2094.19	-0.963703	0.0794112	-12.1356	6.84e-34	6.03e-33	Lysine-arginine-ornithine-binding periplasmic protein precursor (TC 3.A.1.3.1)	NA	K10022	aotJ; arginine/ornithine transport system substrate-binding protein	179	02010 02000	ABC transporters [PATH:ko02010], Transporters [BR:ko02000],	09131 09183	09130 09180
D|1136176.5.peg.1503	1	1753670	1754356	-	687	49	39.5	31.5	31.5	36.5	43	25.5	45	52	30.5	37	28	33.0197	27.2891	21.8819	22.8602	23.8031	28.0759	37.8604	62.9454	68.3599	46.0021	52.3735	41.9223	38.8661	-0.986883	0.170798	-5.77808	7.56e-09	2.03e-08	Arginine ABC transporter%2C permease protein ArtQ	NA	K09999	artQ; arginine transport system permease protein	168	02010 02000	ABC transporters [PATH:ko02010], Transporters [BR:ko02000],	09131 09183	09130 09180
D|1136176.5.peg.3504	2	622252	623055	-	804	582	485	448.5	431.5	445	500	380	505.5	598	378.5	514	509.5	392.193	339.365	316.229	317.831	294.233	326.464	575.478	706.388	786.139	579.627	727.567	762.088	510.3	-1.05956	0.0972448	-10.8958	1.21e-27	8.5e-27	Phosphonate ABC transporter permease protein phnE1 (TC 3.A.1.9.1)	NA	K02042	phnE; phosphonate transport system permease protein	264	02010 02000	ABC transporters [PATH:ko02010], Transporters [BR:ko02000],	09131 09183	09130 09180
D|1136176.5.peg.1333	1	1580978	1582006	-	1029	64032	61147	59430	55331	63864	64644	56109	62889	70263	53186	63013	63645	43149.3	42785.8	41949.7	40802.6	42226.8	42207.8	84972.3	87968.3	92368.7	81555.7	89194.9	95290.9	65372.7	-1.06984	0.0395894	-27.0234	7.84e-161	1.04e-158	Glutamate Aspartate periplasmic binding protein precursor GltI (TC 3.A.1.3.4)	NA	K09969	aapJ, bztA; general L-amino acid transport system substrate-binding protein	251	02010 02000	ABC transporters [PATH:ko02010], Transporters [BR:ko02000],	09131 09183	09130 09180
D|1136176.5.peg.1454	1	1707276	1708175	+	900	7985.5	7479.5	8223.5	8155	8865	8435	8904.5	8764	8456	8274	7638	7827.5	5380.86	5233.21	5804.35	6013.72	5861.52	5507.44	13484.4	12259	11116.4	12687.4	10811.6	11718.8	8823.21	-1.09242	0.0614585	-17.7748	1.11e-70	2.92e-69	L-proline glycine betaine ABC transport system permease protein ProW (TC 3.A.1.12.1)	NA	K02001	proW; glycine betaine/proline transport system permease protein	299	02010 02000	ABC transporters [PATH:ko02010], Transporters [BR:ko02000],	09131 09183	09130 09180
D|1136176.5.peg.3138	2	227522	227941	+	420	443	479	464	402	465	518	463	483	508	463	506	395	298.525	335.166	327.523	296.446	307.457	338.216	701.174	675.614	667.824	709.966	716.243	591.404	497.13	-1.09337	0.0622966	-17.551	5.84e-69	1.5e-67	Ribose ABC transport system%2C high affinity permease RbsD (TC 3.A.1.2.1)	NA	K06726	rbsD; D-ribose pyranase [EC:5.4.99.62]	134	02010	ABC transporters [PATH:ko02010],	09131	09130
D|1136176.5.peg.984	1	1116438	1117208	+	771	1175	1279	1194	1122	1290	1317	1312	1281	1418	1059	1356	1266	791.799	894.943	842.807	827.394	852.946	859.905	1986.91	1791.85	1864.12	1623.88	1919.42	1895.49	1345.95	-1.12831	0.053264	-21.1833	1.36e-99	6.31e-98	Arginine/ornithine ABC transporter%2C ATP-binding protein AotP	NA	K10025	aotP; arginine/ornithine transport system ATP-binding protein [EC:7.4.2.1]	207	02010 02000	ABC transporters [PATH:ko02010], Transporters [BR:ko02000],	09131 09183	09130 09180
D|1136176.5.peg.3100	2	184866	185897	+	1032	4133.5	3937.5	4349	3965	4583	4562.5	4419.5	4753	4704	4343	4087.5	4315	2785.11	2754.8	3069.82	2923.9	3030.27	2978.65	6692.2	6648.44	6183.95	6659.58	5785.15	6460.53	4664.37	-1.1312	0.0473575	-23.8864	4.24e-126	3.34e-124	Predicted polyamine sensor NspS%2C involved in biofilm formation	NA	K11069	potD; spermidine/putrescine transport system substrate-binding protein	54	02010 02000	ABC transporters [PATH:ko02010], Transporters [BR:ko02000],	09131 09183	09130 09180
D|1136176.5.peg.3507	2	624756	625796	-	1041	3437	2895	2671	2801	3017	3258	3036	3366	3933	2588	2999	3520	2316.1	2025.69	1885.37	2065.53	1994.84	2127.24	4597.76	4708.32	5170.38	3968.45	4245.08	5270.23	3364.58	-1.17139	0.0775437	-15.1061	1.48e-51	2.38e-50	Phosphonate ABC transporter phosphate-binding periplasmic component (TC 3.A.1.9.1)	NA	K02044	phnD; phosphonate transport system substrate-binding protein	213	02010 02000	ABC transporters [PATH:ko02010], Transporters [BR:ko02000],	09131 09183	09130 09180
D|1136176.5.peg.1455	1	1708168	1709412	+	1245	13203.5	12330.5	13810.5	13755	14721	13719	16399.5	16155	14697	14190	13485	12874.5	8897.12	8627.56	9748.04	10143.3	9733.5	8957.51	24834.9	22597.4	19320.9	21759	19088	19275.3	15248.5	-1.17715	0.0754876	-15.5939	8.01e-55	1.46e-53	L-proline glycine betaine ABC transport system permease protein ProV (TC 3.A.1.12.1)	NA	K02000	proV; glycine betaine/proline transport system ATP-binding protein [EC:7.6.2.9]	251	02010 02000	ABC transporters [PATH:ko02010], Transporters [BR:ko02000],	09131 09183	09130 09180
D|1136176.5.peg.1844	1	2129264	2130367	-	1104	591.5	625.5	559.5	589	671	537	622.5	747	829.5	449.5	839	746	398.258	437.325	394.58	434.345	443.664	350.622	941.966	1044.89	1089.82	688.499	1187.6	1116.93	710.709	-1.30439	0.117389	-11.1118	1.1e-28	8.05e-28	L-proline glycine betaine ABC transport system permease protein ProW (TC 3.A.1.12.1)	NA	K02001	proW; glycine betaine/proline transport system permease protein	275	02010 02000	ABC transporters [PATH:ko02010], Transporters [BR:ko02000],	09131 09183	09130 09180
D|1136176.5.peg.1505	1	1755196	1755939	-	744	13	21	19	16	21	14	18	22	25	20	23	16	8.76033	14.6941	13.4115	11.7988	13.8852	9.14098	27.2595	30.7733	32.8654	30.6681	32.5565	23.9556	20.8141	-1.32047	0.212242	-6.22151	4.92e-10	1.42e-09	Arginine ABC transporter%2C ATP-binding protein ArtP	NA	K10000	artP; arginine transport system ATP-binding protein [EC:7.4.2.1]	164	02010 02000	ABC transporters [PATH:ko02010], Transporters [BR:ko02000],	09131 09183	09130 09180
D|1136176.5.peg.1845	1	2130371	2131558	-	1188	654	668	728	719.5	771	598.5	897.5	970	904	591	886	948.5	440.712	467.413	513.872	530.21	509.784	390.45	1358.43	1356.82	1188.41	906.242	1254.13	1419.37	861.321	-1.39194	0.110886	-12.5529	3.83e-36	3.71e-35	L-proline glycine betaine ABC transport system permease protein ProV (TC 3.A.1.12.1)	NA	K02000	proV; glycine betaine/proline transport system ATP-binding protein [EC:7.6.2.9]	263	02010 02000	ABC transporters [PATH:ko02010], Transporters [BR:ko02000],	09131 09183	09130 09180
D|1136176.5.peg.1453	1	1706024	1707016	+	993	49485	45890	48489	49329	52349	49759	75430	73758	67353	67871	62779	61467	33346.5	32110.2	34226.8	36376.6	34613.1	32489	114232	103172	88543.2	104074	88863.6	92030	66173.1	-1.54031	0.0689049	-22.3542	1.1e-110	6.71e-109	putative periplasmic substrate-binding protein	NA	K02002	proX; glycine betaine/proline transport system substrate-binding protein	218	02010 02000	ABC transporters [PATH:ko02010], Transporters [BR:ko02000],	09131 09183	09130 09180
D|1136176.5.peg.1432	1	1684544	1685350	+	807	358	326	345	314	367	395	291	580	930	267	804	789	241.246	228.109	243.525	231.552	242.66	257.906	440.695	811.297	1222.59	409.419	1138.06	1181.31	554.031	-1.84872	0.244927	-7.54802	4.42e-14	1.64e-13	ABC-type tungstate transport system%2C periplasmic binding protein	NA	K05772	tupA, vupA; tungstate transport system substrate-binding protein	167	02010 02000	ABC transporters [PATH:ko02010], Transporters [BR:ko02000],	09131 09183	09130 09180
