# Supplementary material for: Polysaccharide breakdown products drive degradation-dispersal cycles of foraging bacteria through changes in metabolism and motility
Source: eLife. 2024 Oct 21;13:RP93855. doi: 10.7554/eLife.93855 (PMC11493405; doi:10.7554/eLife.93855)
Supplement: Supplementary file 12. [file elife-93855-supp12.xlsx]

## Sheet: Sheet 1
Geneid	Chr	Start	End	Strand	Length	L1_raw	L2_raw	L3_raw	L4_raw	L5_raw	L6_raw	P1_raw	P2_raw	P3_raw	P4_raw	P5_raw	P6_raw	L1_DESeq	L2_DESeq	L3_DESeq	L4_DESeq	L5_DESeq	L6_DESeq	P1_DESeq	P2_DESeq	P3_DESeq	P4_DESeq	P5_DESeq	P6_DESeq	baseMean	log2FoldChange	lfcSE	stat	pvalue	padj	RASTtk_Annotation	RASTtk_Ontology_term	BlastKOALA_KO	BlastKOALA_KO_Definition	BlastKOALA_KO_Score	KEGG_pathway	KEGG_pathway_descr	KEGG_CategB	KEGG_CategA
D|1136176.5.peg.2184	1	2495906	2496652	+	747	1075	961	994	1019	1049	1039	81	89	103	106	88	79	724.412	672.432	701.633	751.439	693.597	678.391	122.668	124.492	135.405	162.541	124.564	118.281	417.488	2.42271	0.0781538	30.9993	5.51e-211	1.35e-208	Flagellar basal-body P-ring formation protein FlgA	NA	K02386	flgA; flagellar basal body P-ring formation protein FlgA	73	02040 02035	Flagellar assembly [PATH:ko02040], Bacterial motility proteins [BR:ko02035],	09142 09183	09140 09180
D|1136176.5.peg.2169	1	2479416	2480549	-	1134	6005	6226	5446	5340	5951	5413	882	680	656	976	552	581	4046.6	4356.46	3844.16	3937.86	3934.79	3534.29	1335.71	951.175	862.387	1496.6	781.356	869.888	2495.94	1.90991	0.148359	12.8736	6.34e-38	6.61e-37	Flagellin protein FlaD	NA	K02406	fliC, hag; flagellin	189	02020 02040 04621 04626 05132 05131 05134 02035	Two-component system [PATH:ko02020], Flagellar assembly [PATH:ko02040], NOD-like receptor signaling pathway [PATH:ko04621], Plant-pathogen interaction [PATH:ko04626], Salmonella infection [PATH:ko05132], Shigellosis [PATH:ko05131], Legionellosis [PATH:ko05134], Bacterial motility proteins [BR:ko02035],	09132 09142 09151 09159 09171 09183	09130 09140 09150 09160 09180
D|1136176.5.peg.459	1	513687	514160	-	474	191.5	174.5	167	165	177.5	166.5	23	18.5	22.5	30	25.5	21.5	128.709	121.751	117.88	121.676	117.032	108.386	34.8315	25.1782	28.9215	46.0021	35.3875	31.4417	76.4331	1.83449	0.142393	12.8833	5.59e-38	5.86e-37	Type IV pilin PilA	NA	K02650	pilA; type IV pilus assembly protein PilA	13	02020 02044 02035	Two-component system [PATH:ko02020], Secretion system [BR:ko02044], Bacterial motility proteins [BR:ko02035],	09132 09183	09130 09180
D|1136176.5.peg.2135	1	2444054	2445160	-	1107	858.5	750	738	783	800	794.5	135.5	148	150	157	129.5	157.5	578.182	524.79	520.931	577.406	528.959	518.424	204.446	207.021	197.192	240.745	182.599	235.064	376.313	1.36128	0.073269	18.5792	4.74e-77	1.39e-75	CheW domain protein	NA	K03408	cheW; purine-binding chemotaxis protein CheW	67	02020 02030 02035	Two-component system [PATH:ko02020], Bacterial chemotaxis [PATH:ko02030], Bacterial motility proteins [BR:ko02035],	09132 09142 09183	09130 09140 09180
D|1136176.5.peg.1641	1	1909120	1909887	+	768	37	31	26	30	28	35	8	3	5	7	5	8	24.9332	21.6913	18.3526	22.1228	18.5136	22.8524	12.1153	4.19636	6.57307	10.7338	7.0775	11.9778	15.095	1.30655	0.280314	4.66101	3.15e-06	6.84e-06	Type IV pilus (Tfp) assembly protein PilF	NA	K02656	pilF; type IV pilus assembly protein PilF	57	02044 02035	Secretion system [BR:ko02044], Bacterial motility proteins [BR:ko02035],	09183	09180
D|1136176.5.peg.2156	1	2465825	2466625	-	801	319	279	262.5	280	302.5	306.5	77	41.5	77	68	79.5	68.5	214.965	195.222	184.937	206.48	199.682	199.796	116.61	57.3503	101.225	104.272	111.824	101.811	149.515	1.02138	0.109846	9.29825	1.43e-20	7.72e-20	Flagellar assembly protein FliH	NA	K02411	fliH; flagellar assembly protein FliH	116	02040 02044 02035	Flagellar assembly [PATH:ko02040], Secretion system [BR:ko02044], Bacterial motility proteins [BR:ko02035],	09142 09183	09140 09180
D|1136176.5.peg.560	1	642119	642307	+	189	39258	37723	39432	38078	43818	40263	9768	11617	7645	13493	9689	8173	26454.8	26395.6	27833.8	28079.8	28972.4	26288.8	14792.8	16249.7	10050.2	20690.2	13714.8	12236.8	20980	0.902739	0.137159	6.58168	4.65e-11	1.43e-10	D01200762: hypothetical protein	NA	K02651	flp, pilA; pilus assembly protein Flp/PilA	14	04112 02044 02035	Cell cycle - Caulobacter [PATH:ko04112], Secretion system [BR:ko02044], Bacterial motility proteins [BR:ko02035],	09143 09183	09140 09180
D|1136176.5.peg.3645	2	784157	786175	-	2019	156	146	149	174	165	162	36	53	44	49	39	38	105.124	102.159	105.174	128.312	109.098	105.774	54.5189	74.1357	57.843	75.1368	55.2045	56.8946	85.7813	0.81054	0.1196	6.77709	1.23e-11	3.93e-11	hypothetical protein	NA	K03406	mcp; methyl-accepting chemotaxis protein	76	02020 02030 02035	Two-component system [PATH:ko02020], Bacterial chemotaxis [PATH:ko02030], Bacterial motility proteins [BR:ko02035],	09132 09142 09183	09130 09140 09180
D|1136176.5.peg.2143	1	2452139	2453659	-	1521	1277.5	1180.5	1088.5	1064	1203.5	1125	275	311	376.5	364.5	284	292	860.534	825.67	767.985	784.623	795.421	734.543	416.464	435.023	494.295	558.159	402.002	437.19	625.992	0.798073	0.0776707	10.2751	9.13e-25	5.74e-24	Flagellar biosynthesis protein FlhF	NA	K02404	flhF; flagellar biosynthesis protein FlhF	244	02035	Bacterial motility proteins [BR:ko02035],	09183	09180
D|1136176.5.peg.1252	1	1468128	1468601	+	474	332.5	290	308.5	302	312.5	335.5	69	83	90.5	93	101.5	81	223.725	202.919	217.407	222.703	206.294	218.731	104.495	116.099	118.315	142.607	142.965	121.275	169.795	0.793149	0.0860885	9.21318	3.17e-20	1.68e-19	Putative chemotaxis protein CheY	NA	K03413	cheY; two-component system, chemotaxis family, chemotaxis protein CheY	10	02020 02030 02022 02035	Two-component system [PATH:ko02020], Bacterial chemotaxis [PATH:ko02030], Two-component system [BR:ko02022], Bacterial motility proteins [BR:ko02035],	09132 09142 09183	09130 09140 09180
D|1136176.5.peg.2142	1	2451238	2452125	-	888	1367	1355	1206	1286.5	1288.5	1276.5	309	358	435	374	359.5	330	921.182	948.121	851.277	948.332	851.623	833.135	467.954	500.766	571.857	573.493	508.164	494.084	705.832	0.779593	0.064608	12.0665	1.59e-33	1.38e-32	Flagellar synthesis regulator FleN	NA	K04562	flhG, fleN; flagellar biosynthesis protein FlhG	206	02035	Bacterial motility proteins [BR:ko02035],	09183	09180
D|1136176.5.peg.2134	1	2443505	2443999	-	495	875.5	790	783.5	755.5	830.5	868.5	259	222	236.5	224.5	215	218.5	589.637	552.779	552.695	556.758	548.795	566.741	392.234	310.531	310.249	343.483	304.332	326.395	446.219	0.764031	0.0614014	12.4432	1.52e-35	1.44e-34	Positive regulator of CheA protein activity (CheW)	NA	K03408	cheW; purine-binding chemotaxis protein CheW	187	02020 02030 02035	Two-component system [PATH:ko02020], Bacterial chemotaxis [PATH:ko02030], Bacterial motility proteins [BR:ko02035],	09132 09142 09183	09130 09140 09180
D|1136176.5.peg.376	1	423032	424141	+	1110	1977	1655	1674.5	2067	1742	1816	590.5	548.5	534.5	601.5	445.5	487.5	1332.24	1158.04	1181.62	1524.26	1151.81	1185.72	893.505	766.535	702.004	921.576	629.897	729.149	1014.7	0.699058	0.104656	6.67958	2.4e-11	7.56e-11	Twitching motility protein PilT	NA	K02670	pilU; twitching motility protein PilU	241	02044 02035	Secretion system [BR:ko02044], Bacterial motility proteins [BR:ko02035],	09183	09180
D|1136176.5.peg.2140	1	2450100	2450480	-	381	396.5	368.5	367.5	353.5	377.5	388.5	90	105	130	111	114	113	266.853	257.497	259.054	260.312	249.272	253.336	136.297	146.873	170.9	170.208	161.367	169.186	208.43	0.694218	0.0754065	9.20634	3.37e-20	1.78e-19	Chemotaxis regulator - transmits chemoreceptor signals to flagelllar motor components CheY	NA	K03413	cheY; two-component system, chemotaxis family, chemotaxis protein CheY	113	02020 02030 02022 02035	Two-component system [PATH:ko02020], Bacterial chemotaxis [PATH:ko02030], Two-component system [BR:ko02022], Bacterial motility proteins [BR:ko02035],	09132 09142 09183	09130 09140 09180
D|1136176.5.peg.2148	1	2458238	2459098	-	861	150	158.5	144	127	153.5	145	31	40	57	34	45	52.5	101.081	110.556	101.645	93.6533	101.163	94.6744	46.9469	55.9515	74.933	52.1358	63.6975	77.8557	81.1911	0.692572	0.120146	5.76442	8.19e-09	2.2e-08	Flagellar biosynthesis protein FliP	NA	K02419	fliP; flagellar biosynthesis protein FliP	190	02040 02044 02035	Flagellar assembly [PATH:ko02040], Secretion system [BR:ko02044], Bacterial motility proteins [BR:ko02035],	09142 09183	09140 09180
D|1136176.5.peg.2170	1	2481182	2482318	-	1137	2582	2445	2343	2344	2601	2529	716	663	705	843	760	733	1739.94	1710.82	1653.85	1728.53	1719.78	1651.25	1084.32	927.396	926.803	1292.66	1075.78	1097.47	1384.05	0.67322	0.0732211	9.19434	3.77e-20	1.99e-19	Flagellin protein FlaC	NA	K02406	fliC, hag; flagellin	198	02020 02040 04621 04626 05132 05131 05134 02035	Two-component system [PATH:ko02020], Flagellar assembly [PATH:ko02040], NOD-like receptor signaling pathway [PATH:ko04621], Plant-pathogen interaction [PATH:ko04626], Salmonella infection [PATH:ko05132], Shigellosis [PATH:ko05131], Legionellosis [PATH:ko05134], Bacterial motility proteins [BR:ko02035],	09132 09142 09151 09159 09171 09183	09130 09140 09150 09160 09180
D|1136176.5.peg.2154	1	2464049	2464486	-	438	118	119	105	130	119	122	33	50.5	29	32	39	31	79.5168	83.2668	74.1162	95.8656	78.6826	79.6571	49.9757	69.9394	38.1238	49.0689	55.2045	46.414	66.6526	0.668858	0.133923	4.99434	5.9e-07	1.39e-06	Flagellar protein FliJ	NA	K02413	fliJ; flagellar protein FliJ	35	02040 02035	Flagellar assembly [PATH:ko02040], Bacterial motility proteins [BR:ko02035],	09142 09183	09140 09180
D|1136176.5.peg.2137	1	2445940	2447061	-	1122	1054.5	1015	907.5	972	1030	965	265.5	327.5	365.5	255.5	333.5	261	710.26	710.216	640.222	716.779	681.034	630.075	401.32	457.403	479.834	391.018	471.361	390.776	556.692	0.65476	0.06856	9.55017	1.29e-21	7.28e-21	Chemotaxis response regulator protein-glutamate methylesterase CheB (EC 3.1.1.61)	KEGG_ENZYME:3.1.1.61	K03412	cheB; two-component system, chemotaxis family, protein-glutamate methylesterase/glutaminase [EC:3.1.1.61 3.5.1.44]	265	02020 02030 02022 02035	Two-component system [PATH:ko02020], Bacterial chemotaxis [PATH:ko02030], Two-component system [BR:ko02022], Bacterial motility proteins [BR:ko02035],	09132 09142 09183	09130 09140 09180
D|1136176.5.peg.215	1	268957	269475	+	519	82	85.5	88.5	78	81.5	93.5	24	23	30.5	19	38.5	21	55.2574	59.4763	62.1164	57.5193	53.5571	60.7222	36.346	32.1721	39.4384	29.1347	53.789	31.4417	47.5809	0.642512	0.1491	4.30928	1.64e-05	3.34e-05	Type IV pilus biogenesis protein PilP	NA	K02665	pilP; type IV pilus assembly protein PilP	69	02044 02035	Secretion system [BR:ko02044], Bacterial motility proteins [BR:ko02035],	09183	09180
D|1136176.5.peg.4394	2	1636413	1637138	-	726	378	379.5	351.5	359	372	363.5	112.5	119	128.5	109.5	100.5	105	254.723	265.194	247.76	264.736	245.966	237.013	169.614	166.456	168.271	167.141	141.55	157.209	207.136	0.642491	0.0763938	8.41024	4.09e-17	1.84e-16	P pilus assembly protein%2C chaperone PapD	NA	K07346	fimC; fimbrial chaperone protein	18	03110 02044 02035	Chaperones and folding catalysts [BR:ko03110], Secretion system [BR:ko02044], Bacterial motility proteins [BR:ko02035],	09182 09183	09180
D|1136176.5.peg.2162	1	2472675	2474141	-	1467	1114	929	907	923	1014	992	310	353	306	268	275	294	750.693	650.04	640.222	680.646	670.455	647.704	469.469	493.772	402.272	410.952	389.262	440.184	553.806	0.633107	0.0690413	9.16998	4.73e-20	2.49e-19	Flagellar regulatory protein FleQ	NA	K10941	flrA, fleQ, flaK; sigma-54 dependent transcriptional regulator, flagellar regulatory protein	301	02020 05111 02025 02040 03000 02035	Two-component system [PATH:ko02020], Biofilm formation - Vibrio cholerae [PATH:ko05111], Biofilm formation - Pseudomonas aeruginosa [PATH:ko02025], Flagellar assembly [PATH:ko02040], Transcription factors [BR:ko03000], Bacterial motility proteins [BR:ko02035],	09132 09145 09142 09182 09183	09130 09140 09180
D|1136176.5.peg.4014	2	1201415	1203331	+	1917	2852	2757	2480	2530	2740	2564	901	766	741	969	743	791	1921.88	1929.13	1750.55	1865.69	1811.68	1674.1	1364.49	1071.47	974.129	1485.87	1051.72	1184.31	1507.09	0.619829	0.0979661	6.32697	2.5e-10	7.35e-10	Methyl-accepting chemotaxis protein I (serine chemoreceptor protein)	NA	K03406	mcp; methyl-accepting chemotaxis protein	297	02020 02030 02035	Two-component system [PATH:ko02020], Bacterial chemotaxis [PATH:ko02030], Bacterial motility proteins [BR:ko02035],	09132 09142 09183	09130 09140 09180
D|1136176.5.peg.458	1	512002	513687	-	1686	891.5	813.5	795	802	829.5	884	278	246	278.5	253	285.5	221.5	600.419	568.873	561.165	591.417	548.133	577.187	421.007	344.102	365.463	387.951	403.417	330.887	475.002	0.614537	0.0610046	10.0736	7.23e-24	4.4e-23	Type IV fimbrial assembly%2C ATPase PilB	NA	K02652	pilB; type IV pilus assembly protein PilB	298	02044 02035	Secretion system [BR:ko02044], Bacterial motility proteins [BR:ko02035],	09183	09180
D|1136176.5.peg.2144	1	2453687	2455786	-	2100	495	449	390	445	452.5	419	138	148	141.5	119	161.5	126	333.566	314.175	275.289	328.155	298.862	273.576	208.989	207.021	185.361	182.475	227.895	188.65	252.001	0.602478	0.0842436	7.15162	8.58e-13	2.95e-12	Flagellar biosynthesis protein FlhA	NA	K02400	flhA; flagellar biosynthesis protein FlhA	522	02040 02044 02035	Flagellar assembly [PATH:ko02040], Secretion system [BR:ko02044], Bacterial motility proteins [BR:ko02035],	09142 09183	09140 09180
D|1136176.5.peg.2179	1	2492264	2492977	-	714	6026.5	5780	5612.5	5369	6192	5899	1829.5	1867.5	1997	1804	1860.5	1790.5	4060.75	4044.39	3961.33	3959.25	4094.14	3851.62	2769.87	2611.54	2625.28	2766.26	2632.83	2680.03	3338.11	0.576145	0.0290595	19.8264	1.76e-87	6.44e-86	Flagellar basal-body rod modification protein FlgD	NA	K02389	flgD; flagellar basal-body rod modification protein FlgD	127	02040 02035	Flagellar assembly [PATH:ko02040], Bacterial motility proteins [BR:ko02035],	09142 09183	09140 09180
D|1136176.5.peg.2161	1	2471450	2472490	-	1041	743	660	634	694	698	714	204	202	254	252	190	222	500.686	461.816	447.52	511.775	461.516	466.19	308.941	282.555	333.912	386.418	268.945	332.384	396.888	0.576105	0.0794417	7.25192	4.11e-13	1.44e-12	Flagellar sensor histidine kinase FleS	NA	K10942	flrB, fleS, flaL; two-component system, sensor histidine kinase FlrB [EC:2.7.13.3]	188	02020 05111 01001 02022 02035	Two-component system [PATH:ko02020], Biofilm formation - Vibrio cholerae [PATH:ko05111], Protein kinases [BR:ko01001], Two-component system [BR:ko02022], Bacterial motility proteins [BR:ko02035],	09132 09145 09181 09183	09130 09140 09180
D|1136176.5.peg.2182	1	2494063	2494890	-	828	2118	2111	1999.5	1947.5	2057	2049	792.5	637.5	715.5	745	570	554.5	1427.26	1477.11	1411.03	1435.77	1360.08	1337.85	1199.42	891.028	939.949	1142.39	806.835	829.463	1188.18	0.54111	0.0957701	5.6501	1.6e-08	4.22e-08	Chemotaxis protein methyltransferase CheR (EC 2.1.1.80)	KEGG_ENZYME:2.1.1.80	K00575	cheR; chemotaxis protein methyltransferase CheR [EC:2.1.1.80]	215	02020 02030 02035	Two-component system [PATH:ko02020], Bacterial chemotaxis [PATH:ko02030], Bacterial motility proteins [BR:ko02035],	09132 09142 09183	09130 09140 09180
D|1136176.5.peg.2160	1	2470007	2471416	-	1410	4383	4101	4141	3933	4332	4193	1296	1356	1457	1405	1339	1386	2953.58	2869.55	2923	2900.3	2864.31	2737.72	1962.68	1896.76	1915.39	2154.43	1895.35	2075.15	2429.02	0.536256	0.0402075	13.3372	1.41e-40	1.58e-39	Flagellar regulatory protein FleQ	NA	K10943	flrC, fleR, flaM; two-component system, response regulator FlrC	325	02020 05111 02040 02022 02035	Two-component system [PATH:ko02020], Biofilm formation - Vibrio cholerae [PATH:ko05111], Flagellar assembly [PATH:ko02040], Two-component system [BR:ko02022], Bacterial motility proteins [BR:ko02035],	09132 09145 09142 09183	09130 09140 09180
D|1136176.5.peg.2147	1	2457957	2458226	-	270	95	92.5	92.5	84.5	89.5	107	29	40.5	37	22.5	30.5	31	64.0178	64.3743	64.9399	61.9439	58.8466	69.8632	43.918	55.9515	48.6407	33.7349	42.465	46.414	54.5925	0.496671	0.13607	3.65011	0.000262	0.000475	Flagellar biosynthesis protein FliQ	NA	K02420	fliQ; flagellar biosynthesis protein FliQ	62	02040 02044 02035	Flagellar assembly [PATH:ko02040], Secretion system [BR:ko02044], Bacterial motility proteins [BR:ko02035],	09142 09183	09140 09180
D|1136176.5.peg.2138	1	2447075	2449252	-	2178	2569	2546.5	2348	2241	2522	2497	810	834	978	752.5	850	789.5	1731.18	1781.49	1657.38	1652.57	1667.54	1630.36	1226.68	1166.59	1285.69	1153.12	1203.17	1181.31	1444.76	0.487065	0.0405489	12.0118	3.08e-33	2.63e-32	Signal transduction histidine kinase CheA (EC 2.7.3.-)	KEGG_ENZYME:2.7.3.-	K03407	cheA; two-component system, chemotaxis family, sensor kinase CheA [EC:2.7.13.3]	442	02020 02030 01001 02022 02035	Two-component system [PATH:ko02020], Bacterial chemotaxis [PATH:ko02030], Protein kinases [BR:ko01001], Two-component system [BR:ko02022], Bacterial motility proteins [BR:ko02035],	09132 09142 09181 09183	09130 09140 09180
D|1136176.5.peg.2146	1	2457168	2457950	-	783	368	355	337	330	367	353.5	115	119.5	144	112.5	122.5	108	247.985	248.401	237.878	243.351	242.66	230.483	174.158	166.456	189.304	171.741	172.691	161.7	207.234	0.483424	0.073215	6.6028	4.03e-11	1.25e-10	Flagellar biosynthesis protein FliR	NA	K02421	fliR; flagellar biosynthesis protein FliR	227	02040 02044 02035	Flagellar assembly [PATH:ko02040], Secretion system [BR:ko02044], Bacterial motility proteins [BR:ko02035],	09142 09183	09140 09180
D|1136176.5.peg.96	1	119009	119416	-	408	497	411	430	469	444	454	200	159	158	165	111	131	334.914	287.585	303.523	345.853	293.572	296.429	302.883	222.407	207.709	253.012	157.12	196.137	266.762	0.477216	0.123576	3.86172	0.000113	0.000212	Flagellar biosynthesis protein FliL	NA	K02415	fliL; flagellar protein FliL	58	02040 02035	Flagellar assembly [PATH:ko02040], Bacterial motility proteins [BR:ko02035],	09142 09183	09140 09180
D|1136176.5.peg.2157	1	2466750	2467811	-	1062	503	457	452.5	456.5	473.5	490.5	166	166	165.5	169.5	157.5	148	338.957	319.772	319.052	336.267	312.747	319.934	251.393	232.199	216.911	259.145	222.233	221.589	279.183	0.474563	0.0664466	7.14202	9.2e-13	3.16e-12	Flagellar motor switch protein FliG	NA	K02410	fliG; flagellar motor switch protein FliG	241	02030 02040 02035	Bacterial chemotaxis [PATH:ko02030], Flagellar assembly [PATH:ko02040], Bacterial motility proteins [BR:ko02035],	09142 09183	09140 09180
D|1136176.5.peg.3901	2	1065476	1066150	-	675	433	429	456	441	475	559	142	176	160	166	156	160	291.786	300.18	321.876	325.205	314.069	364.986	215.047	246.187	210.338	254.545	220.818	239.556	275.383	0.470124	0.0790461	5.94747	2.72e-09	7.56e-09	P pilus assembly protein%2C chaperone PapD	NA	K07346	fimC; fimbrial chaperone protein	27	03110 02044 02035	Chaperones and folding catalysts [BR:ko03110], Secretion system [BR:ko02044], Bacterial motility proteins [BR:ko02035],	09182 09183	09180
D|1136176.5.peg.457	1	510758	511987	-	1230	99	84	82	94	95	99.5	36	23.5	31	36	39	27	66.7133	58.7765	57.8812	69.3182	62.8138	64.6398	54.5189	32.1721	40.753	55.2026	55.2045	40.4251	54.8683	0.456285	0.139077	3.2808	0.00103511	0.00175045	Type IV fimbrial assembly protein PilC	NA	K02653	pilC; type IV pilus assembly protein PilC	249	02044 02035	Secretion system [BR:ko02044], Bacterial motility proteins [BR:ko02035],	09183	09180
D|1136176.5.peg.2155	1	2464506	2465825	-	1320	454	446	337.5	376	401.5	372.5	168	127	161	122	132.5	130.5	305.938	312.075	237.878	277.273	265.14	242.889	254.422	177.646	211.653	187.075	186.846	194.639	237.789	0.437536	0.103703	4.21914	2.45e-05	4.92e-05	Flagellum-specific ATP synthase FliI	NA	K02412	fliI; flagellum-specific ATP synthase [EC:7.4.2.8]	422	02040 02044 02035	Flagellar assembly [PATH:ko02040], Secretion system [BR:ko02044], Bacterial motility proteins [BR:ko02035],	09142 09183	09140 09180
D|1136176.5.peg.622	1	709498	710262	+	765	1435.5	1376.5	1250	1170.5	1289.5	1323.5	481	439	502	475	478.5	403.5	967.005	962.816	882.335	862.79	852.285	863.822	728.434	614.068	659.936	728.367	676.609	603.382	783.487	0.427461	0.0626006	6.82838	8.59e-12	2.77e-11	Flagellar motor rotation protein MotA	NA	K02556	motA; chemotaxis protein MotA	266	02020 02030 02040 02000 02035	Two-component system [PATH:ko02020], Bacterial chemotaxis [PATH:ko02030], Flagellar assembly [PATH:ko02040], Transporters [BR:ko02000], Bacterial motility proteins [BR:ko02035],	09132 09142 09183	09130 09140 09180
D|1136176.5.peg.2141	1	2450511	2451245	-	735	738	736	712	693	752	778	246	284	294	225.5	279	243	497.317	514.994	502.578	511.037	497.221	507.977	372.546	397.256	386.497	345.016	394.924	363.826	440.932	0.421207	0.0528286	7.97309	1.55e-15	6.36e-15	RNA polymerase sigma factor for flagellar operon	NA	K02405	fliA, whiG; RNA polymerase sigma factor FliA	163	02020 05111 02025 02026 02040 03021 02035	Two-component system [PATH:ko02020], Biofilm formation - Vibrio cholerae [PATH:ko05111], Biofilm formation - Pseudomonas aeruginosa [PATH:ko02025], Biofilm formation - Escherichia coli [PATH:ko02026], Flagellar assembly [PATH:ko02040], Transcription machinery [BR:ko03021], Bacterial motility proteins [BR:ko02035],	09132 09145 09142 09182 09183	09130 09140 09180
D|1136176.5.peg.2671	1	3083969	3085849	+	1881	504	467	440	481	486	481	145	185	221	111	209	161	339.631	326.77	310.582	354.703	321.342	314.058	219.59	258.776	290.53	170.208	295.839	241.053	286.923	0.410523	0.106587	3.85151	0.000117	0.000221	Methyl-accepting chemotaxis protein	NA	K03406	mcp; methyl-accepting chemotaxis protein	234	02020 02030 02035	Two-component system [PATH:ko02020], Bacterial chemotaxis [PATH:ko02030], Bacterial motility proteins [BR:ko02035],	09132 09142 09183	09130 09140 09180
D|1136176.5.peg.3033	2	90990	92549	-	1560	2137	2082	1932	1821	2049	2011	824	677	707	868	665	643	1440.06	1456.82	1363.74	1342.86	1354.8	1313.04	1247.88	946.979	929.432	1331	941.307	962.716	1219.22	0.380143	0.0956323	3.97505	7.04e-05	0.000135	Methyl-accepting chemotaxis protein I (serine chemoreceptor protein)	NA	K03406	mcp; methyl-accepting chemotaxis protein	64	02020 02030 02035	Two-component system [PATH:ko02020], Bacterial chemotaxis [PATH:ko02030], Bacterial motility proteins [BR:ko02035],	09132 09142 09183	09130 09140 09180
D|1136176.5.peg.623	1	710275	711222	+	948	962.5	902.5	797	818.5	901.5	975.5	355	346	340	319	291.5	311.5	648.264	631.148	562.577	603.216	595.74	636.604	537.617	483.98	446.969	489.156	411.91	465.637	542.735	0.377073	0.0650426	5.79733	6.74e-09	1.82e-08	Flagellar motor rotation protein MotB	NA	K02557	motB; chemotaxis protein MotB	204	02030 02040 02000 02035	Bacterial chemotaxis [PATH:ko02030], Flagellar assembly [PATH:ko02040], Transporters [BR:ko02000], Bacterial motility proteins [BR:ko02035],	09142 09183	09140 09180
D|1136176.5.peg.2653	1	3062125	3062760	-	636	1154	1175	994	929	1133	1058	388	356	414	425	389	391	777.648	822.172	701.633	685.07	749.138	690.797	587.593	497.968	544.25	651.697	550.629	585.415	653.667	0.374752	0.072253	5.18667	2.14e-07	5.18e-07	Sodium-type flagellar protein MotX	NA	K21217	motX; sodium-type polar flagellar protein MotX	151	02040 02000 02035	Flagellar assembly [PATH:ko02040], Transporters [BR:ko02000], Bacterial motility proteins [BR:ko02035],	09142 09183	09140 09180
D|1136176.5.peg.1572	1	1833891	1835651	-	1761	387	361	359	352	409	357	118	151	140	124	157	130	260.788	252.599	253.407	259.574	270.43	233.095	178.701	211.217	184.046	190.142	222.233	194.639	225.906	0.372237	0.0748966	4.97	6.7e-07	1.56e-06	Methyl-accepting chemotaxis protein I (serine chemoreceptor protein)	NA	K03406	mcp; methyl-accepting chemotaxis protein	134	02020 02030 02035	Two-component system [PATH:ko02020], Bacterial chemotaxis [PATH:ko02030], Bacterial motility proteins [BR:ko02035],	09132 09142 09183	09130 09140 09180
D|1136176.5.peg.2178	1	2490909	2492213	-	1305	9140	8805	8440	7820	9100	8828	3177	3237	3525	3156	3238	3082	6159.18	6161.04	5957.53	5766.68	6016.9	5764.04	4811.3	4527.87	4634.02	4839.42	4583.39	4614.45	5319.65	0.355313	0.0305859	11.6169	3.38e-31	2.72e-30	Flagellar hook protein FlgE	NA	K02390	flgE; flagellar hook protein FlgE	239	02040 02035	Flagellar assembly [PATH:ko02040], Bacterial motility proteins [BR:ko02035],	09142 09183	09140 09180
D|1136176.5.peg.2139	1	2449262	2449993	-	732	490	480.5	459.5	475	483.5	481.5	200	187.5	204	139	196.5	165	330.197	335.866	323.993	350.278	319.359	314.058	302.883	261.573	268.181	213.143	277.438	247.042	295.334	0.327935	0.072273	4.53745	5.69e-06	1.22e-05	Chemotaxis response - phosphatase CheZ	NA	K03414	cheZ; chemotaxis protein CheZ	133	02030 02035	Bacterial chemotaxis [PATH:ko02030], Bacterial motility proteins [BR:ko02035],	09142 09183	09140 09180
D|1136176.5.peg.2158	1	2467804	2469486	-	1683	946	910	885.5	885.5	889.5	887.5	346	341	393.5	327.5	352.5	304	637.482	636.746	624.693	652.623	587.805	579.146	523.988	476.987	516.643	501.423	498.256	455.157	557.579	0.322029	0.0550379	5.85104	4.89e-09	1.33e-08	Flagellar M-ring protein FliF	NA	K02409	fliF; flagellar M-ring protein FliF	319	02040 02044 02035	Flagellar assembly [PATH:ko02040], Secretion system [BR:ko02044], Bacterial motility proteins [BR:ko02035],	09142 09183	09140 09180
D|1136176.5.peg.214	1	268341	268970	+	630	76	75.5	75.5	80	87.5	90.5	35	30	31.5	28	31.5	31	51.2142	52.479	52.9401	58.9942	57.5242	58.7634	53.0045	41.9636	40.753	42.9353	43.8805	46.414	50.0722	0.307459	0.138236	2.22415	0.0261381	0.0365681	Type IV pilus biogenesis protein PilO	NA	K02664	pilO; type IV pilus assembly protein PilO	56	02044 02035	Secretion system [BR:ko02044], Bacterial motility proteins [BR:ko02035],	09183	09180
D|1136176.5.peg.1152	1	1307695	1309578	+	1884	732	610	584	597	679	657	256	253	250	254	247	239	493.274	426.83	412.227	440.244	448.954	428.973	387.69	353.893	328.654	389.485	349.628	357.837	401.474	0.293022	0.0657536	4.45636	8.34e-06	1.75e-05	Methyl-accepting chemotaxis protein	NA	K03406	mcp; methyl-accepting chemotaxis protein	316	02020 02030 02035	Two-component system [PATH:ko02020], Bacterial chemotaxis [PATH:ko02030], Bacterial motility proteins [BR:ko02035],	09132 09142 09183	09130 09140 09180
D|1136176.5.peg.213	1	267734	268348	+	615	37	35	34	40	36	41.5	17.5	13	10	21	17	9	24.9332	24.4902	23.9995	29.4971	23.8031	26.77	25.7451	18.1842	13.1461	32.2015	24.0635	13.475	23.3591	0.287533	0.20463	1.40514	0.15998	0.196286	Type IV pilus biogenesis protein PilN	NA	K02663	pilN; type IV pilus assembly protein PilN	39	02044 02035	Secretion system [BR:ko02044], Bacterial motility proteins [BR:ko02035],	09183	09180
D|1136176.5.peg.569	1	649088	650302	+	1215	20786.5	20223.5	21581.5	20276	22451.5	21330.5	9564	8104	6944.5	10800	7617	6253.5	14007.1	14150.5	15233.3	14952.1	14844.6	13926.9	14483.9	11335.8	9128.68	16560.8	10781.9	9362.15	13230.6	0.281937	0.134454	2.09691	0.0360016	0.0493123	Type II/IV secretion system ATPase TadZ/CpaE%2C associated with Flp pilus assembly	NA	K02282	cpaE, tadZ; pilus assembly protein CpaE	62	02044 02035	Secretion system [BR:ko02044], Bacterial motility proteins [BR:ko02035],	09183	09180
D|1136176.5.peg.4392	2	1633248	1635632	-	2385	502	440.5	458	475.5	524	478	180.5	192	224	172	192	180	338.283	307.877	323.288	350.278	346.468	312.099	272.595	268.567	294.474	263.746	271.776	269.501	301.579	0.268119	0.0653632	4.10198	4.1e-05	8.04e-05	P pilus assembly protein%2C porin PapC	NA	K07347	fimD, fimC, mrkC, htrE, cssD; outer membrane usher protein	82	05133 02000 02044 02035	Pertussis [PATH:ko05133], Transporters [BR:ko02000], Secretion system [BR:ko02044], Bacterial motility proteins [BR:ko02035],	09171 09183	09160 09180
D|1136176.5.peg.2159	1	2469563	2469874	-	312	1319	1186	1100	1205	1317	1358	466	560	551	449	552	445	888.836	829.869	776.455	888.6	870.798	886.675	705.717	783.321	724.352	688.499	781.356	666.265	790.895	0.240407	0.0570423	4.21453	2.5e-05	5.02e-05	Flagellar hook-basal body complex protein FliE	NA	K02408	fliE; flagellar hook-basal body complex protein FliE	68	02040 02035	Flagellar assembly [PATH:ko02040], Bacterial motility proteins [BR:ko02035],	09142 09183	09140 09180
D|1136176.5.peg.1441	1	1692913	1694961	-	2049	200	167	179	158	176	164	80	80	67	86	63	60	134.774	116.853	126.35	116.514	116.371	107.08	121.153	111.903	88.0792	131.873	89.1765	89.8335	112.497	0.188683	0.110877	1.70174	0.088805	0.114292	Methyl-accepting chemotaxis protein I (serine chemoreceptor protein)	NA	K03406	mcp; methyl-accepting chemotaxis protein	29	02020 02030 02035	Two-component system [PATH:ko02020], Bacterial chemotaxis [PATH:ko02030], Bacterial motility proteins [BR:ko02035],	09132 09142 09183	09130 09140 09180
D|1136176.5.peg.3900	2	1062994	1065432	-	2439	214.5	199	196	191	255	222	88	93.5	100	81	102	74.5	144.208	139.244	138.35	140.849	168.606	144.95	133.269	130.087	131.461	124.206	144.381	110.795	137.534	0.178067	0.0921978	1.93136	0.0534385	0.0712003	hypothetical protein	NA	K07347	fimD, fimC, mrkC, htrE, cssD; outer membrane usher protein	103	05133 02000 02044 02035	Pertussis [PATH:ko05133], Transporters [BR:ko02000], Secretion system [BR:ko02044], Bacterial motility proteins [BR:ko02035],	09171 09183	09160 09180
D|1136176.5.peg.1222	1	1424297	1426222	+	1926	458	425	427	460	444	469	163	188	229	154	217	189	308.633	297.381	301.406	339.217	293.572	306.223	246.85	262.972	301.047	236.144	307.163	282.976	290.299	0.169859	0.0739756	2.29615	0.0216675	0.0307586	hypothetical protein	NA	K03406	mcp; methyl-accepting chemotaxis protein	113	02020 02030 02035	Two-component system [PATH:ko02020], Bacterial chemotaxis [PATH:ko02030], Bacterial motility proteins [BR:ko02035],	09132 09142 09183	09130 09140 09180
D|1136176.5.peg.2175	1	2488206	2488982	-	777	217	212	204	241	246	204	81	95	114	98	94	82	146.23	148.341	143.997	177.72	162.655	133.197	122.668	132.885	149.866	150.274	133.057	122.772	143.638	0.165545	0.0975908	1.69632	0.0898258	0.115505	Flagellar L-ring protein FlgH	NA	K02393	flgH; flagellar L-ring protein FlgH	146	02040 02035	Flagellar assembly [PATH:ko02040], Bacterial motility proteins [BR:ko02035],	09142 09183	09140 09180
D|1136176.5.peg.2172	1	2483957	2485837	-	1881	380	337.5	361.5	333.5	347	354.5	117.5	155.5	162.5	148	179	141.5	256.071	235.806	254.818	245.563	229.436	231.136	177.187	216.812	212.968	226.944	253.374	211.109	229.269	0.160349	0.0779982	2.0558	0.0398014	0.0541812	Flagellar hook-associated protein FlgK	NA	K02396	flgK; flagellar hook-associated protein 1	259	02040 02035	Flagellar assembly [PATH:ko02040], Bacterial motility proteins [BR:ko02035],	09142 09183	09140 09180
D|1136176.5.peg.991	1	1124788	1126905	+	2118	2133	2092	2081	2012	2241	2220	773	882	1051	799	1043	928	1437.37	1463.82	1468.91	1483.7	1481.75	1449.5	1170.64	1233.73	1381.66	1225.19	1476.37	1389.43	1388.5	0.156671	0.0557861	2.80842	0.00497852	0.00768294	N-acetylglucosamine regulated methyl-accepting chemotaxis protein	NA	K03406	mcp; methyl-accepting chemotaxis protein	244	02020 02030 02035	Two-component system [PATH:ko02020], Bacterial chemotaxis [PATH:ko02030], Bacterial motility proteins [BR:ko02035],	09132 09142 09183	09130 09140 09180
D|1136176.5.peg.216	1	269511	271226	+	1716	1367	1245	1214	1277	1417	1432	585	617	540	621	570	506	921.182	871.152	856.924	941.695	936.918	934.991	885.933	863.052	709.892	952.244	806.835	757.596	869.868	0.136132	0.0683029	1.99306	0.0462553	0.0623271	Type IV pilus biogenesis protein PilQ	NA	K02666	pilQ; type IV pilus assembly protein PilQ	254	02044 02035	Secretion system [BR:ko02044], Bacterial motility proteins [BR:ko02035],	09183	09180
D|1136176.5.peg.2176	1	2489077	2489865	-	789	250	265	240	251	278	283.5	98	109	107	114	141	113	168.468	185.426	169.408	185.094	183.813	184.778	148.413	152.468	140.664	174.808	199.585	169.186	171.843	0.130537	0.0864506	1.50996	0.131054	0.164242	Flagellar basal-body rod protein FlgG	NA	K02392	flgG; flagellar basal-body rod protein FlgG	209	02040 02035	Flagellar assembly [PATH:ko02040], Bacterial motility proteins [BR:ko02035],	09142 09183	09140 09180
D|1136176.5.peg.2181	1	2493413	2493808	-	396	5688	5308.5	5256.5	4994	6066	5744.5	2196.5	2731	2447	2302	2542	2177	3832.98	3714.12	3710.04	3682.71	4010.83	3750.41	3325.66	3820.09	3216.86	3529.9	3598.2	3259.46	3620.94	0.129693	0.04788	2.7087	0.00675467	0.0102636	Flagellar basal-body rod protein FlgB	NA	K02387	flgB; flagellar basal-body rod protein FlgB	118	02040 02035	Flagellar assembly [PATH:ko02040], Bacterial motility proteins [BR:ko02035],	09142 09183	09140 09180
D|1136176.5.peg.2177	1	2489887	2490636	-	750	227	217	211	220	237	222.5	91	98	97	101	93	105	152.969	151.839	148.938	162.234	156.704	144.95	137.812	137.081	127.518	154.874	131.641	157.209	146.981	0.120069	0.0847941	1.41601	0.156773	0.192728	Flagellar basal-body rod protein FlgF	NA	K02391	flgF; flagellar basal-body rod protein FlgF	169	02040 02035	Flagellar assembly [PATH:ko02040], Bacterial motility proteins [BR:ko02035],	09142 09183	09140 09180
D|1136176.5.peg.2683	1	3097181	3098827	-	1647	396	376	372	356	380	402	175	170	168	147	174	180	266.853	263.095	262.583	262.524	251.255	262.477	265.023	237.794	220.855	225.41	246.297	269.501	252.806	0.100943	0.0674396	1.49679	0.134449	0.168179	Methyl-accepting chemotaxis protein I (serine chemoreceptor protein)	NA	K03406	mcp; methyl-accepting chemotaxis protein	166	02020 02030 02035	Two-component system [PATH:ko02020], Bacterial chemotaxis [PATH:ko02030], Bacterial motility proteins [BR:ko02035],	09132 09142 09183	09130 09140 09180
D|1136176.5.peg.2150	1	2459612	2460022	-	411	465.5	439.5	398	411.5	475	448	184	195	221	162	228.5	186	313.35	307.177	280.936	303.083	314.069	292.511	278.652	272.764	290.53	248.412	322.734	278.484	291.892	0.0967691	0.0677905	1.42747	0.153443	0.189186	Flagellar motor switch protein FliN	NA	K02417	fliN; flagellar motor switch protein FliN	111	02030 02040 02044 02035	Bacterial chemotaxis [PATH:ko02030], Flagellar assembly [PATH:ko02040], Secretion system [BR:ko02044], Bacterial motility proteins [BR:ko02035],	09142 09183	09140 09180
D|1136176.5.peg.570	1	650336	651787	+	1452	20494	19857.5	20947.5	19840.5	22450	21227	10632	9165	7902	11970	8457.5	7098.5	13810.3	13894.4	14785.8	14630.6	14843.9	13859.7	16101.3	12819.9	10388.1	18354.9	11970.9	10627.3	13840.6	0.0967207	0.129538	0.746661	0.455268	0.504501	Type II/IV secretion system ATP hydrolase TadA/VirB11/CpaF%2C TadA subfamily	NA	K02283	cpaF, tadA; pilus assembly protein CpaF [EC:7.4.2.8]	224	02044 02035	Secretion system [BR:ko02044], Bacterial motility proteins [BR:ko02035],	09183	09180
D|1136176.5.peg.1429	1	1678843	1680462	-	1620	820	823	786	838	964	926	217	475	481	217	538	408	552.574	575.87	554.812	617.964	637.395	604.61	328.628	664.424	632.329	332.749	761.539	610.868	572.814	0.0884883	0.185665	0.476601	0.633646	0.679608	Methyl-accepting chemotaxis protein	NA	K03406	mcp; methyl-accepting chemotaxis protein	159	02020 02030 02035	Two-component system [PATH:ko02020], Bacterial chemotaxis [PATH:ko02030], Bacterial motility proteins [BR:ko02035],	09132 09142 09183	09130 09140 09180
D|1136176.5.peg.2183	1	2494902	2495828	-	927	3703	3933	3389.5	3238.5	3700	3534	1846.5	1608.5	1418.5	2069	1416	1259.5	2495.35	2752	2392.19	2387.79	2446.43	2307.44	2795.61	2249.25	1864.12	3172.61	2004.35	1885.01	2396.01	0.0816201	0.128119	0.637064	0.524083	0.572287	Chemotaxis protein CheV (EC 2.7.3.-)	KEGG_ENZYME:2.7.3.-	K03415	cheV; two-component system, chemotaxis family, chemotaxis protein CheV	225	02020 02030 02022 02035	Two-component system [PATH:ko02020], Bacterial chemotaxis [PATH:ko02030], Two-component system [BR:ko02022], Bacterial motility proteins [BR:ko02035],	09132 09142 09183	09130 09140 09180
D|1136176.5.peg.2152	1	2461103	2461591	-	489	1010	1025.5	1027	1013	1118	1090.5	408	467	507	477	532	454	680.61	717.214	724.927	747.014	739.22	711.69	617.881	653.234	666.509	731.434	753.046	679.74	701.877	0.0748828	0.0530799	1.41076	0.158316	0.194472	Flagellar biosynthesis protein FliL	NA	K02415	fliL; flagellar protein FliL	60	02040 02035	Flagellar assembly [PATH:ko02040], Bacterial motility proteins [BR:ko02035],	09142 09183	09140 09180
D|1136176.5.peg.2151	1	2460052	2461095	-	1044	1110.5	995.5	941.5	984	1054	1088	433	446	554.5	427.5	565.5	408.5	747.997	696.222	664.222	725.629	696.903	710.385	655.742	623.859	728.296	654.764	799.757	610.868	692.887	0.0572724	0.0671145	0.853353	0.393463	0.441813	Flagellar motor switch protein FliM	NA	K02416	fliM; flagellar motor switch protein FliM	363	02030 02040 02035	Bacterial chemotaxis [PATH:ko02030], Flagellar assembly [PATH:ko02040], Bacterial motility proteins [BR:ko02035],	09142 09183	09140 09180
D|1136176.5.peg.551	1	635121	635801	-	681	3118.5	3054	3094	2988	3240	3373	1078	1508.5	1556	1450.5	1572.5	1490	2101.13	2136.95	2183.96	2203.43	2142.28	2202.32	1632.54	2109.37	2045.54	2223.44	2225.17	2230.87	2119.75	0.056977	0.0700689	0.813156	0.416129	0.464567	P pilus assembly protein%2C chaperone PapD	NA	K07346	fimC; fimbrial chaperone protein	33	03110 02044 02035	Chaperones and folding catalysts [BR:ko03110], Secretion system [BR:ko02044], Bacterial motility proteins [BR:ko02035],	09182 09183	09180
D|1136176.5.peg.2180	1	2492995	2493408	-	414	6402.5	5719.5	5924	5284	6599	6301.5	2598	2846.5	3021	2895	2773.5	2467.5	4314.12	4001.7	4181.56	3896.57	4363.25	4114.09	3934.45	3980.95	3971.45	4439.21	3925.18	3693.66	4068.02	0.0549624	0.0480458	1.14396	0.252641	0.29652	Flagellar basal-body rod protein FlgC	NA	K02388	flgC; flagellar basal-body rod protein FlgC	106	02040 02035	Flagellar assembly [PATH:ko02040], Bacterial motility proteins [BR:ko02035],	09142 09183	09140 09180
D|1136176.5.peg.2145	1	2456028	2457158	-	1131	329	336	325.5	305.5	313	368.5	150	161	207	119	133	148.5	221.704	235.106	229.407	224.915	206.955	240.277	227.162	225.205	272.125	182.475	188.261	221.589	222.932	0.0413162	0.0891618	0.463385	0.643088	0.687838	Flagellar biosynthesis protein FlhB	NA	K02401	flhB; flagellar biosynthesis protein FlhB	244	02040 02044 02035	Flagellar assembly [PATH:ko02040], Secretion system [BR:ko02044], Bacterial motility proteins [BR:ko02035],	09142 09183	09140 09180
D|1136176.5.peg.2171	1	2482757	2483947	-	1191	142	140.5	128.5	150.5	150	143.5	53.5	85.5	75.5	62	57	67.5	95.6897	97.9609	90.3511	110.614	99.1797	93.3686	80.264	118.897	98.5961	95.0711	80.6835	100.314	96.7492	0.0294838	0.107531	0.27419	0.783939	0.815198	Flagellar hook-associated protein FlgL	NA	K02397	flgL; flagellar hook-associated protein 3 FlgL	169	02040 02035	Flagellar assembly [PATH:ko02040], Bacterial motility proteins [BR:ko02035],	09142 09183	09140 09180
D|1136176.5.peg.550	1	632720	635110	-	2391	5067.5	4996	5053	4713.5	5340	5307	2099	2563.5	2523	2280.5	2510	2334.5	3414.51	3495.8	3566.75	3475.5	3530.8	3465.08	3178.76	3585.09	3316.77	3496.16	3552.9	3494.52	3464.39	0.0224392	0.0339991	0.659992	0.509259	0.557937	P pilus assembly protein%2C porin PapC	NA	K07347	fimD, fimC, mrkC, htrE, cssD; outer membrane usher protein	109	05133 02000 02044 02035	Pertussis [PATH:ko05133], Transporters [BR:ko02000], Secretion system [BR:ko02044], Bacterial motility proteins [BR:ko02035],	09171 09183	09160 09180
D|1136176.5.peg.746	1	837997	839130	+	1134	2854.5	2747	2517	2665	2717	2530.5	1404	1250.5	1114	1638	1035	1037	1923.23	1922.13	1776.67	1965.24	1796.48	1651.91	2126.24	1748.48	1464.48	2511.72	1465.04	1552.62	1825.35	0.0223599	0.129046	0.173271	0.862439	0.882982	Flagellin protein FlaF	NA	K02406	fliC, hag; flagellin	183	02020 02040 04621 04626 05132 05131 05134 02035	Two-component system [PATH:ko02020], Flagellar assembly [PATH:ko02040], NOD-like receptor signaling pathway [PATH:ko04621], Plant-pathogen interaction [PATH:ko04626], Salmonella infection [PATH:ko05132], Shigellosis [PATH:ko05131], Legionellosis [PATH:ko05134], Bacterial motility proteins [BR:ko02035],	09132 09142 09151 09159 09171 09183	09130 09140 09150 09160 09180
D|1136176.5.peg.4112	2	1313732	1315603	-	1872	1901	2002	1789	1776	1852	1775	869	954	877	936	798	795	1281.03	1400.84	1262.8	1309.67	1224.54	1158.95	1316.03	1334.44	1152.92	1435.27	1129.57	1190.29	1266.36	0.015501	0.0696028	0.222707	0.823763	0.848782	Methyl-accepting chemotaxis protein	NA	K03406	mcp; methyl-accepting chemotaxis protein	265	02020 02030 02035	Two-component system [PATH:ko02020], Bacterial chemotaxis [PATH:ko02030], Bacterial motility proteins [BR:ko02035],	09132 09142 09183	09130 09140 09180
D|1136176.5.peg.564	1	645144	646598	+	1455	34627.5	34060.5	37339.5	34052.5	39816	36618	18039	16573.5	15172.5	21199.5	16529	14517.5	23334.1	23832.5	26356.4	25110.9	26326.3	23908.9	27318.5	23182.1	19945.3	32506.6	23396.8	21735.2	24746.1	0.00765657	0.105477	0.0725901	0.942132	0.953221	Type II/IV secretion system secretin RcpA/CpaC%2C associated with Flp pilus assembly	NA	K02280	cpaC, rcpA; pilus assembly protein CpaC	204	02044 02035	Secretion system [BR:ko02044], Bacterial motility proteins [BR:ko02035],	09183	09180
D|1136176.5.peg.4393	2	1635724	1636410	-	687	206	203.5	192.5	193	205	192.5	93.5	100	117.5	91.5	108.5	63	138.817	142.043	135.527	142.323	135.546	125.362	140.841	139.879	153.81	139.54	152.874	94.3252	136.741	-0.00736443	0.0973271	-0.0756668	0.939684	0.950951	D01204084: hypothetical protein	NA	K07346	fimC; fimbrial chaperone protein	13	03110 02044 02035	Chaperones and folding catalysts [BR:ko03110], Secretion system [BR:ko02044], Bacterial motility proteins [BR:ko02035],	09182 09183	09180
D|1136176.5.peg.4256	2	1480405	1481967	+	1563	223	188	189	206	208	212	97	98	110	96	116	73	150.273	131.547	133.409	151.91	137.529	138.421	146.898	137.081	144.608	147.207	164.198	109.297	141.032	-0.0123467	0.0923374	-0.133713	0.893629	0.910498	Aerotaxis sensor receptor protein	NA	K03776	aer; aerotaxis receptor	203	02020 02030 02035	Two-component system [PATH:ko02020], Bacterial chemotaxis [PATH:ko02030], Bacterial motility proteins [BR:ko02035],	09132 09142 09183	09130 09140 09180
D|1136176.5.peg.2310	1	2634660	2635091	+	432	87	82	100	91	78	92	38	51	35	43	44	47	58.6268	57.3771	70.5868	67.1059	51.5735	60.0693	57.5478	71.3382	46.0115	65.9364	62.282	70.3696	61.5687	-0.0298373	0.13228	-0.225561	0.821543	0.847467	Type IV pilus biogenesis protein PilE	NA	K02655	pilE; type IV pilus assembly protein PilE	31	02044 02035	Secretion system [BR:ko02044], Bacterial motility proteins [BR:ko02035],	09183	09180
D|1136176.5.peg.863	1	966941	968977	-	2037	805	807	757	741	802	853	320	432	459	351	453	342	542.466	564.675	534.342	546.434	530.281	556.947	484.613	604.276	603.408	538.225	641.221	512.051	554.912	-0.0492433	0.066234	-0.743474	0.457195	0.506394	Methyl-accepting chemotaxis protein	NA	K03406	mcp; methyl-accepting chemotaxis protein	132	02020 02030 02035	Two-component system [PATH:ko02020], Bacterial chemotaxis [PATH:ko02030], Bacterial motility proteins [BR:ko02035],	09132 09142 09183	09130 09140 09180
D|1136176.5.peg.1864	1	2145724	2147340	-	1617	594	529	560	579	589	610	274	301	254	348	284	244	400.28	370.152	395.286	426.97	389.446	398.285	414.95	421.035	333.912	533.625	402.002	365.323	404.272	-0.0519933	0.0937575	-0.554551	0.579202	0.625996	N-acetylglucosamine regulated methyl-accepting chemotaxis protein	NA	K03406	mcp; methyl-accepting chemotaxis protein	65	02020 02030 02035	Two-component system [PATH:ko02020], Bacterial chemotaxis [PATH:ko02030], Bacterial motility proteins [BR:ko02035],	09132 09142 09183	09130 09140 09180
D|1136176.5.peg.2379	1	2710022	2711962	+	1941	604	592	559	528	636	627	287	314	316	306	260	283	407.018	414.235	394.58	389.362	420.522	409.385	434.637	439.219	415.418	469.222	368.03	423.715	415.445	-0.064613	0.0587941	-1.09897	0.271781	0.316668	Methyl-accepting chemotaxis protein I (serine chemoreceptor protein)	NA	K03406	mcp; methyl-accepting chemotaxis protein	78	02020 02030 02035	Two-component system [PATH:ko02020], Bacterial chemotaxis [PATH:ko02030], Bacterial motility proteins [BR:ko02035],	09132 09142 09183	09130 09140 09180
D|1136176.5.peg.3052	2	111361	112974	-	1614	162	166	164	161	191	188	87	77	98	92	80	81	109.167	116.154	115.762	118.726	126.289	122.75	131.754	107.707	128.832	141.073	113.24	121.275	121.061	-0.0667653	0.0927515	-0.71983	0.47163	0.520891	Methyl-accepting chemotaxis protein I (serine chemoreceptor protein)	NA	K03406	mcp; methyl-accepting chemotaxis protein	67	02020 02030 02035	Two-component system [PATH:ko02020], Bacterial chemotaxis [PATH:ko02030], Bacterial motility proteins [BR:ko02035],	09132 09142 09183	09130 09140 09180
D|1136176.5.peg.1779	1	2057385	2059019	+	1635	102	103	116	98	109	104	40	53	56	38	73	58	68.7349	72.0712	81.8807	72.2679	72.0706	67.9044	60.5766	74.1357	73.6184	58.2694	103.331	86.8391	74.3084	-0.0751949	0.126282	-0.595454	0.55154	0.59959	Methyl-accepting chemotaxis protein I (serine chemoreceptor protein)	NA	K03406	mcp; methyl-accepting chemotaxis protein	181	02020 02030 02035	Two-component system [PATH:ko02020], Bacterial chemotaxis [PATH:ko02030], Bacterial motility proteins [BR:ko02035],	09132 09142 09183	09130 09140 09180
D|1136176.5.peg.4401	2	1645089	1646978	+	1890	522	512	502	524	549	595	232	267	318	272	276	250	351.761	358.257	354.346	386.412	362.998	388.492	351.344	373.476	418.047	417.086	390.678	374.306	377.267	-0.0793478	0.0609108	-1.30269	0.192681	0.232802	Methyl-accepting chemotaxis protein	NA	K03406	mcp; methyl-accepting chemotaxis protein	270	02020 02030 02035	Two-component system [PATH:ko02020], Bacterial chemotaxis [PATH:ko02030], Bacterial motility proteins [BR:ko02035],	09132 09142 09183	09130 09140 09180
D|1136176.5.peg.3519	2	638493	640130	-	1638	650	575	527	518	573	595	255	276	380	235	364	246	438.016	402.339	371.993	381.987	378.867	388.492	386.176	386.065	499.553	360.35	515.242	368.317	406.45	-0.0931163	0.0970372	-0.959594	0.33726	0.385321	Methyl-accepting chemotaxis protein I (serine chemoreceptor protein)	NA	K03406	mcp; methyl-accepting chemotaxis protein	112	02020 02030 02035	Two-component system [PATH:ko02020], Bacterial chemotaxis [PATH:ko02030], Bacterial motility proteins [BR:ko02035],	09132 09142 09183	09130 09140 09180
D|1136176.5.peg.2149	1	2459154	2459612	-	459	148	135.5	146.5	157.5	139	165.5	62	74	97.5	69.5	72	82.5	99.733	94.4623	103.057	115.776	91.9066	107.733	93.8937	103.51	127.518	105.805	101.916	122.772	105.674	-0.101484	0.103594	-0.979631	0.327268	0.375106	Flagellar biosynthesis protein FliQ	NA	K02418	fliO, fliZ; flagellar protein FliO/FliZ	19	02040 02044 02035	Flagellar assembly [PATH:ko02040], Secretion system [BR:ko02044], Bacterial motility proteins [BR:ko02035],	09142 09183	09140 09180
D|1136176.5.peg.375	1	421980	423017	+	1038	1155.5	1071.5	1087	1030.5	1077.5	1128	569	561.5	638.5	543.5	604.5	559.5	778.321	749.401	767.279	759.55	712.11	736.502	861.702	784.72	838.724	832.639	854.962	836.949	792.738	-0.153805	0.0430355	-3.57391	0.000352	0.000626	Twitching motility protein PilT	NA	K02669	pilT; twitching motility protein PilT	267	02044 02035	Secretion system [BR:ko02044], Bacterial motility proteins [BR:ko02035],	09183	09180
D|1136176.5.peg.2185	1	2496790	2497149	+	360	5437	5377	5183	5069	5557	5449	2912	3067	2977	3146	2448	2457	3663.84	3762.4	3658.51	3738.02	3674.28	3557.8	4409.98	4290.08	3913.61	4824.09	3465.14	3678.68	3886.37	-0.156326	0.0741488	-2.10827	0.0350079	0.0480221	Negative regulator of flagellin synthesis FlgM	NA	K02398	flgM; negative regulator of flagellin synthesis FlgM	15	02020 02025 02026 02040 02035	Two-component system [PATH:ko02020], Biofilm formation - Pseudomonas aeruginosa [PATH:ko02025], Biofilm formation - Escherichia coli [PATH:ko02026], Flagellar assembly [PATH:ko02040], Bacterial motility proteins [BR:ko02035],	09132 09145 09142 09183	09130 09140 09180
D|1136176.5.peg.563	1	644386	645135	+	750	7443	7483	8402	7917	9038.5	8179.5	3848	4442.5	3999.5	5140	4483.5	3793.5	5015.62	5236.01	5930.7	5838.21	5975.91	5340.29	5827.47	6213.41	5257.14	7881.7	6345.68	5678.98	5878.43	-0.158264	0.0923684	-1.7134	0.0866384	0.111746	Flp pilus assembly protein RcpC/CpaB	NA	K02279	cpaB, rcpC; pilus assembly protein CpaB	70	02044 02035	Secretion system [BR:ko02044], Bacterial motility proteins [BR:ko02035],	09183	09180
D|1136176.5.peg.2187	1	2497974	2498405	-	432	137.5	122.5	131	131.5	118	134.5	49	63	81.5	84	67.5	73.5	92.3204	85.3659	92.4687	96.603	78.0214	87.4922	74.2063	88.1236	106.484	128.806	94.8385	109.297	94.5023	-0.177276	0.115064	-1.54067	0.123397	0.155528	Flagellar protein FlgP	NA	K09860	flgP; outer membrane protein FlgP	53	02040 02035	Flagellar assembly [PATH:ko02040], Bacterial motility proteins [BR:ko02035],	09142 09183	09140 09180
D|1136176.5.peg.212	1	266725	267750	+	1026	65	78	70	73	82	79.5	34.5	51	43	51	36	28	43.8016	54.5782	49.4108	53.8322	54.2183	51.5812	51.4901	71.3382	56.5284	78.2036	50.958	41.9223	54.8219	-0.189009	0.140564	-1.34465	0.178737	0.217426	Type IV pilus biogenesis protein PilM	NA	K02662	pilM; type IV pilus assembly protein PilM	58	02044 02035	Secretion system [BR:ko02044], Bacterial motility proteins [BR:ko02035],	09183	09180
D|1136176.5.peg.1326	1	1574552	1575955	-	1404	402	374	395	386	410	430	237	224	223	178	226	226	270.896	261.696	278.818	284.647	271.091	280.759	358.916	313.328	293.159	272.946	319.903	338.373	295.378	-0.201879	0.0676586	-2.9838	0.00284696	0.00453365	N-acetylglucosamine regulated methyl-accepting chemotaxis protein	NA	K03406	mcp; methyl-accepting chemotaxis protein	188	02020 02030 02035	Two-component system [PATH:ko02020], Bacterial chemotaxis [PATH:ko02030], Bacterial motility proteins [BR:ko02035],	09132 09142 09183	09130 09140 09180
D|1136176.5.peg.2174	1	2486987	2488078	-	1092	476.5	434	418	405.5	471.5	447.5	248	228.5	262	237	238	259	320.763	303.679	295.053	298.658	311.424	291.858	375.575	318.924	344.429	363.417	336.889	387.781	329.037	-0.221324	0.0623874	-3.54757	0.000389	0.000689	Flagellar P-ring protein FlgI	NA	K02394	flgI; flagellar P-ring protein FlgI	314	02040 02035	Flagellar assembly [PATH:ko02040], Bacterial motility proteins [BR:ko02035],	09142 09183	09140 09180
D|1136176.5.peg.362	1	409280	410905	-	1626	428	427	443	454	481	481	253	302	252	218	248	240	288.417	298.781	312.7	334.792	318.036	314.058	383.147	422.434	331.283	334.282	351.044	359.334	337.359	-0.225066	0.0699059	-3.21955	0.00128392	0.00214309	N-acetylglucosamine regulated methyl-accepting chemotaxis protein	NA	K03406	mcp; methyl-accepting chemotaxis protein	235	02020 02030 02035	Two-component system [PATH:ko02020], Bacterial chemotaxis [PATH:ko02030], Bacterial motility proteins [BR:ko02035],	09132 09142 09183	09130 09140 09180
D|1136176.5.peg.2173	1	2486059	2486976	-	918	304.5	292	313	310.5	338.5	323.5	158	186.5	224	187	163	145	204.857	204.318	220.937	228.602	223.485	210.895	239.278	260.174	294.474	286.747	230.726	217.098	235.133	-0.243548	0.080578	-3.02251	0.0025069	0.00402053	Flagellar protein FlgJ [peptidoglycan hydrolase] (EC 3.2.1.-)	KEGG_ENZYME:3.2.1.-	K02395	flgJ; peptidoglycan hydrolase FlgJ	134	02040 02035	Flagellar assembly [PATH:ko02040], Bacterial motility proteins [BR:ko02035],	09142 09183	09140 09180
D|1136176.5.peg.969	1	1093966	1094907	+	942	442	438	429	412	471	494	289	273	275	237	242	233	297.851	306.478	302.817	303.82	311.424	322.546	437.666	381.869	361.519	363.417	342.551	348.854	340.068	-0.275765	0.0643199	-4.28739	1.81e-05	3.67e-05	Chemotaxis protein CheV (EC 2.7.3.-)	KEGG_ENZYME:2.7.3.-	K03415	cheV; two-component system, chemotaxis family, chemotaxis protein CheV	221	02020 02030 02022 02035	Two-component system [PATH:ko02020], Bacterial chemotaxis [PATH:ko02030], Two-component system [BR:ko02022], Bacterial motility proteins [BR:ko02035],	09132 09142 09183	09130 09140 09180
D|1136176.5.peg.896	1	1008465	1009346	+	882	238	232	244	228	266	270	148	109	139	156	146	156	160.381	162.335	172.232	168.133	175.879	176.29	224.133	152.468	182.731	239.211	206.663	233.567	187.835	-0.28256	0.0964734	-2.92889	0.00340175	0.00534561	Sodium-type flagellar protein motY precursor	NA	K21218	motY; sodium-type flagellar protein MotY	162	02040 02000 02035	Flagellar assembly [PATH:ko02040], Transporters [BR:ko02000], Bacterial motility proteins [BR:ko02035],	09142 09183	09140 09180
D|1136176.5.peg.1235	1	1444991	1446544	-	1554	358	321	343	334	375	389	190	198	227	212	214	216	241.246	224.61	242.113	246.301	247.949	253.989	287.739	276.96	298.417	325.082	302.917	323.401	272.56	-0.31554	0.0655373	-4.81466	1.47e-06	3.31e-06	D01204290: hypothetical protein	NA	K03406	mcp; methyl-accepting chemotaxis protein	73	02020 02030 02035	Two-component system [PATH:ko02020], Bacterial chemotaxis [PATH:ko02030], Bacterial motility proteins [BR:ko02035],	09132 09142 09183	09130 09140 09180
D|1136176.5.peg.3009	2	63854	65278	+	1425	1785	1871	1871	1696	2014	2021	986	1143	1268	876	1213	1229	1202.86	1309.18	1320.68	1250.68	1331.65	1319.57	1493.21	1598.81	1666.93	1343.26	1717	1840.09	1449.49	-0.320927	0.0699833	-4.58577	4.52e-06	9.74e-06	N-acetylglucosamine regulated methyl-accepting chemotaxis protein	NA	K03406	mcp; methyl-accepting chemotaxis protein	138	02020 02030 02035	Two-component system [PATH:ko02020], Bacterial chemotaxis [PATH:ko02030], Bacterial motility proteins [BR:ko02035],	09132 09142 09183	09130 09140 09180
D|1136176.5.peg.2167	1	2477151	2477576	-	426	27855.5	25250.5	24172.5	23616	27203	26589.5	17399	16826.5	13992.5	17303	13998	12248	18770.7	17667.9	17062.2	17415.1	17986.6	17360.7	26349.3	23536	18394.1	26532.5	19814.2	18338	19935.6	-0.323359	0.100377	-3.22144	0.00127548	0.00212978	Flagellin protein FlaG	NA	K06603	flaG; flagellar protein FlaG	16	02035	Bacterial motility proteins [BR:ko02035],	09183	09180
D|1136176.5.peg.2691	1	3108362	3109657	+	1296	155	157	176	148	170	161	103	115	102	76	96	86	104.45	109.856	124.233	109.139	112.404	105.121	155.985	160.861	134.091	116.539	135.888	128.761	124.777	-0.324996	0.094969	-3.42213	0.000621	0.00107901	Methyl-accepting chemotaxis protein I (serine chemoreceptor protein)	NA	K03406	mcp; methyl-accepting chemotaxis protein	205	02020 02030 02035	Two-component system [PATH:ko02020], Bacterial chemotaxis [PATH:ko02030], Bacterial motility proteins [BR:ko02035],	09132 09142 09183	09130 09140 09180
D|1136176.5.peg.3516	2	634981	636642	+	1662	593	588	589	543	638	593	295	375	364	265	453	373	399.606	411.436	415.756	400.423	421.844	387.186	446.752	524.545	478.52	406.352	641.221	558.465	457.676	-0.32773	0.094178	-3.4799	0.000502	0.000882	Methyl-accepting chemotaxis protein I (serine chemoreceptor protein)	NA	K03406	mcp; methyl-accepting chemotaxis protein	202	02020 02030 02035	Two-component system [PATH:ko02020], Bacterial chemotaxis [PATH:ko02030], Bacterial motility proteins [BR:ko02035],	09132 09142 09183	09130 09140 09180
D|1136176.5.peg.2164	1	2474369	2474779	-	411	792	809.5	626.5	665.5	703.5	687	457.5	468.5	430	493	420	367.5	533.706	566.074	441.873	490.389	464.822	448.561	692.088	654.633	565.284	755.968	594.51	549.482	563.116	-0.371288	0.0933012	-3.97946	6.91e-05	0.000132	Flagellar biosynthesis protein FliS	NA	K02422	fliS; flagellar secretion chaperone FliS	77	02040 02035	Flagellar assembly [PATH:ko02040], Bacterial motility proteins [BR:ko02035],	09142 09183	09140 09180
D|1136176.5.peg.4002	2	1185597	1187240	-	1644	74	65	67	63	64	70	45	48	37	43	39	38	49.8665	45.4818	47.2932	46.4579	42.3167	45.7049	68.1487	67.1418	48.6407	65.9364	55.2045	56.8946	53.2573	-0.380727	0.131768	-2.88939	0.00385996	0.00603094	Methyl-accepting chemotaxis protein I (serine chemoreceptor protein)	NA	K03406	mcp; methyl-accepting chemotaxis protein	160	02020 02030 02035	Two-component system [PATH:ko02020], Bacterial chemotaxis [PATH:ko02030], Bacterial motility proteins [BR:ko02035],	09132 09142 09183	09130 09140 09180
D|1136176.5.peg.2168	1	2477657	2478787	-	1131	26687	25885	23079	23215	25422	24367	20412	16644	13329	20466	11835	11403	17983.6	18112.3	16290.7	17119.4	16809	15909.9	30912.2	23281.4	17522.5	31382.7	16752.4	17072.9	19929.1	-0.421609	0.161891	-2.60427	0.0092069	0.0137558	Flagellin protein FlaA	NA	K02406	fliC, hag; flagellin	187	02020 02040 04621 04626 05132 05131 05134 02035	Two-component system [PATH:ko02020], Flagellar assembly [PATH:ko02040], NOD-like receptor signaling pathway [PATH:ko04621], Plant-pathogen interaction [PATH:ko04626], Salmonella infection [PATH:ko05132], Shigellosis [PATH:ko05131], Legionellosis [PATH:ko05134], Bacterial motility proteins [BR:ko02035],	09132 09142 09151 09159 09171 09183	09130 09140 09150 09160 09180
D|1136176.5.peg.2527	1	2897161	2898417	-	1257	966	983	859	818	944	916	588	538	660	561	608	548	650.96	687.825	606.341	603.216	624.171	598.081	890.476	752.548	867.645	860.24	860.624	820.48	735.217	-0.421779	0.0556458	-7.57971	3.46e-14	1.29e-13	N-acetylglucosamine regulated methyl-accepting chemotaxis protein	NA	K03406	mcp; methyl-accepting chemotaxis protein	153	02020 02030 02035	Two-component system [PATH:ko02020], Bacterial chemotaxis [PATH:ko02030], Bacterial motility proteins [BR:ko02035],	09132 09142 09183	09130 09140 09180
D|1136176.5.peg.2186	1	2497216	2497641	+	426	3261	3302	3298	3085	3582	3318	2171	2346	2213	2780	1868	1888	2197.49	2310.48	2327.95	2274.96	2368.41	2166.41	3287.8	3281.56	2909.24	4262.86	2644.15	2826.76	2738.17	-0.493391	0.100697	-4.89974	9.6e-07	2.2e-06	Flagellar biosynthesis protein FlgN	NA	K02399	flgN; flagellar biosynthesis protein FlgN	18	02040 02035	Flagellar assembly [PATH:ko02040], Bacterial motility proteins [BR:ko02035],	09142 09183	09140 09180
D|1136176.5.peg.4109	2	1310473	1311387	-	915	612	571	589	597	641	632	459	409	426	362	402	411	412.409	399.54	415.756	440.244	423.828	412.65	695.117	572.104	560.026	555.092	569.031	615.36	505.93	-0.509083	0.0611911	-8.31957	8.83e-17	3.88e-16	Chemotaxis protein CheV (EC 2.7.3.-)	KEGG_ENZYME:2.7.3.-	K03415	cheV; two-component system, chemotaxis family, chemotaxis protein CheV	179	02020 02030 02022 02035	Two-component system [PATH:ko02020], Bacterial chemotaxis [PATH:ko02030], Two-component system [BR:ko02022], Bacterial motility proteins [BR:ko02035],	09132 09142 09183	09130 09140 09180
D|1136176.5.peg.1962	1	2251715	2253706	+	1992	597	672	643	554	637	610	406	457	505	331	496	407	402.301	470.212	453.873	408.535	421.183	398.285	614.853	639.246	663.88	507.557	702.088	609.371	524.282	-0.550524	0.0774549	-7.10766	1.18e-12	4.01e-12	Methyl-accepting chemotaxis protein I (serine chemoreceptor protein)	NA	K03406	mcp; methyl-accepting chemotaxis protein	228	02020 02030 02035	Two-component system [PATH:ko02020], Bacterial chemotaxis [PATH:ko02030], Bacterial motility proteins [BR:ko02035],	09132 09142 09183	09130 09140 09180
D|1136176.5.peg.1703	1	1970911	1972797	-	1887	420	427	388	377	450	443	276	327	368	212	315	314	283.026	298.781	273.877	278.01	297.539	289.247	417.979	457.403	483.778	325.082	445.882	470.129	360.061	-0.597627	0.083484	-7.15858	8.15e-13	2.81e-12	N-acetylglucosamine regulated methyl-accepting chemotaxis protein	NA	K03406	mcp; methyl-accepting chemotaxis protein	293	02020 02030 02035	Two-component system [PATH:ko02020], Bacterial chemotaxis [PATH:ko02030], Bacterial motility proteins [BR:ko02035],	09132 09142 09183	09130 09140 09180
D|1136176.5.peg.456	1	509822	510691	-	870	139.5	159	160.5	141	152	157	105	119.5	111	96	96.5	128.5	93.6681	111.256	112.939	103.977	100.502	102.51	159.014	166.456	145.922	147.207	135.888	191.645	130.915	-0.597659	0.0956439	-6.2488	4.14e-10	1.2e-09	Leader peptidase (Prepilin peptidase) (EC 3.4.23.43) / N-methyltransferase (EC 2.1.1.-)	KEGG_ENZYME:3.4.23.43,KEGG_ENZYME:2.1.1.-	K02654	pilD, pppA; leader peptidase (prepilin peptidase) / N-methyltransferase [EC:3.4.23.43 2.1.1.-]	165	01002 02044 02035	Peptidases and inhibitors [BR:ko01002], Secretion system [BR:ko02044], Bacterial motility proteins [BR:ko02035],	09181 09183	09180
D|1136176.5.peg.3071	2	151121	152734	-	1614	292	310	284	258	297	326	241	230	221	184	214	208	196.77	216.913	200.467	190.256	196.376	212.854	364.974	321.721	290.53	282.146	302.917	311.423	257.279	-0.624973	0.0732065	-8.53712	1.38e-17	6.36e-17	Methyl-accepting chemotaxis protein I (serine chemoreceptor protein)	NA	K03406	mcp; methyl-accepting chemotaxis protein	63	02020 02030 02035	Two-component system [PATH:ko02020], Bacterial chemotaxis [PATH:ko02030], Bacterial motility proteins [BR:ko02035],	09132 09142 09183	09130 09140 09180
D|1136176.5.peg.748	1	839427	840560	+	1134	6917	6525	5997	5830	6164	5807	5533	4889	3946	6504	3574	3468	4661.17	4565.68	4233.09	4299.2	4075.63	3791.55	8379.26	6838.67	5187.47	9973.26	5059	5192.38	5521.36	-0.66485	0.161747	-4.11042	3.95e-05	7.76e-05	Flagellin protein FlaD	NA	K02406	fliC, hag; flagellin	189	02020 02040 04621 04626 05132 05131 05134 02035	Two-component system [PATH:ko02020], Flagellar assembly [PATH:ko02040], NOD-like receptor signaling pathway [PATH:ko04621], Plant-pathogen interaction [PATH:ko04626], Salmonella infection [PATH:ko05132], Shigellosis [PATH:ko05131], Legionellosis [PATH:ko05134], Bacterial motility proteins [BR:ko02035],	09132 09142 09151 09159 09171 09183	09130 09140 09150 09160 09180
D|1136176.5.peg.2640	1	3047342	3047803	+	462	300.5	282	257.5	247.5	323	305.5	232	237.5	229.5	194	265.5	229	202.161	197.321	181.408	182.145	213.567	199.143	351.344	331.513	301.047	297.48	375.107	342.865	264.592	-0.764199	0.0751422	-10.17	2.7e-24	1.67e-23	Chemotaxis protein CheX	NA	K03409	cheX; chemotaxis protein CheX	122	02030 02035	Bacterial chemotaxis [PATH:ko02030], Bacterial motility proteins [BR:ko02035],	09142 09183	09140 09180
D|1136176.5.peg.2166	1	2475101	2477128	-	2028	17010	15549	14578.5	13516.5	17043	16565	15072.5	12462.5	12419.5	14287.5	11339.5	10554	11462.6	10880	10290.1	9967.07	11268.8	10815.7	22825.3	17431.7	16326.2	21907.7	16050.3	15801.7	14585.6	-0.770455	0.100068	-7.69933	1.37e-14	5.26e-14	Flagellar hook-associated protein FliD	NA	K02407	fliD; flagellar hook-associated protein 2	31	02040 02035	Flagellar assembly [PATH:ko02040], Bacterial motility proteins [BR:ko02035],	09142 09183	09140 09180
D|1136176.5.peg.4231	2	1448623	1450566	-	1944	207	213	206	181	240	196	159	184	216	147	210	210	139.491	149.04	145.409	133.474	158.688	127.974	240.792	257.377	283.957	225.41	297.255	314.417	206.107	-0.924159	0.0922179	-10.0215	1.23e-23	7.38e-23	Methyl-accepting chemotaxis protein I (serine chemoreceptor protein)	NA	K03406	mcp; methyl-accepting chemotaxis protein	52	02020 02030 02035	Two-component system [PATH:ko02020], Bacterial chemotaxis [PATH:ko02030], Bacterial motility proteins [BR:ko02035],	09132 09142 09183	09130 09140 09180
