# Supplementary material for: Polysaccharide breakdown products drive degradation-dispersal cycles of foraging bacteria through changes in metabolism and motility
Source: eLife. 2024 Oct 21;13:RP93855. doi: 10.7554/eLife.93855 (PMC11493405; doi:10.7554/eLife.93855)
Supplement: Supplementary file 14. [file elife-93855-supp14.xlsx]

## Sheet: Sheet 1
Geneid	Chr	Start	End	Strand	Length	L1_raw	L2_raw	L3_raw	L4_raw	L5_raw	L6_raw	P1_raw	P2_raw	P3_raw	P4_raw	P5_raw	P6_raw	L1_DESeq	L2_DESeq	L3_DESeq	L4_DESeq	L5_DESeq	L6_DESeq	P1_DESeq	P2_DESeq	P3_DESeq	P4_DESeq	P5_DESeq	P6_DESeq	baseMean	log2FoldChange	lfcSE	stat	pvalue	padj	RASTtk_Annotation	RASTtk_Ontology_term	BlastKOALA_KO	BlastKOALA_KO_Definition	BlastKOALA_KO_Score	KEGG_pathway	KEGG_pathway_descr	KEGG_CategB	KEGG_CategA
D|1136176.5.peg.477	1	535063	535509	-	447	7122	6576	6038	6121	6520	6711	1137	1143	1237	1229	1210	1210	4799.31	4601.36	4262.03	4513.79	4311.01	4381.79	1721.89	1598.81	1626.18	1884.55	1712.75	1811.64	3102.09	1.37628	0.0496944	27.6949	8.04e-169	1.29e-166	C4-type zinc finger protein%2C DksA/TraR family	NA	K06204	dksA; DnaK suppressor protein	126	02026 03000 03021 03009	Biofilm formation - Escherichia coli [PATH:ko02026], Transcription factors [BR:ko03000], Transcription machinery [BR:ko03021], Ribosome biogenesis [BR:ko03009],	09145 09182	09140 09180
D|1136176.5.peg.607	1	695937	696326	+	390	12036	9089	9322	10465	9818	9793	2738	1678	1159	3081	967	1450	8110.72	6359.76	6580.1	7717.18	6491.64	6394.11	4146.47	2347.17	1523.64	4724.42	1368.79	2170.98	4827.91	1.35531	0.31	4.37198	1.23e-05	2.54e-05	Curlin genes transcriptional activator	NA	K11926	crl; sigma factor-binding protein Crl	61	03000	Transcription factors [BR:ko03000],	09182	09180
D|1136176.5.peg.3976	2	1146477	1149185	-	2709	4395	3702	3703	4063	3855	3882	943	846	738	927	615	626	2961.66	2590.37	2613.83	2996.17	2548.92	2534.66	1428.09	1183.37	970.185	1421.47	870.532	937.263	1921.38	1.2546	0.12574	9.97778	1.91e-23	1.14e-22	Transcriptional activator of maltose regulon%2C MalT	NA	K03556	malT; LuxR family transcriptional regulator, maltose regulon positive regulatory protein	521	03000	Transcription factors [BR:ko03000],	09182	09180
D|1136176.5.peg.4229	2	1447011	1447706	+	696	163	148	149	163.5	169.5	151	36	27	30.5	39.5	21.5	39	109.841	103.559	105.174	120.201	111.743	98.592	54.5189	37.7673	39.4384	59.8028	29.7255	58.3918	77.3962	1.22589	0.135035	9.07828	1.1e-19	5.68e-19	Thiaminase II (EC 3.5.99.2)	KEGG_ENZYME:3.5.99.2	K03707	tenA; thiaminase (transcriptional activator TenA) [EC:3.5.99.2]	187	00730 03000	Thiamine metabolism [PATH:ko00730], Transcription factors [BR:ko03000],	09108 09182	09100 09180
D|1136176.5.peg.2880	1	3312553	3313017	+	465	1196	1297	1093	1027	1167	1248	227	238	280	269	284	277	805.95	907.538	771.514	757.338	771.618	814.853	343.772	332.911	368.092	412.486	402.002	414.731	591.9	1.08751	0.0718235	15.1414	8.64e-52	1.4e-50	Regulatory protein AsnC	NA	K03718	asnC; Lrp/AsnC family transcriptional regulator, regulator for asnA, asnC and gidA	117	03000	Transcription factors [BR:ko03000],	09182	09180
D|1136176.5.peg.1072	1	1216346	1217044	+	699	486	426	379	419	398	425	108	109	87	120	85	101	327.501	298.081	267.524	308.982	263.157	277.494	163.557	152.468	114.371	184.009	120.317	151.22	219.057	0.980975	0.107365	9.13686	6.43e-20	3.37e-19	Transcriptional regulator yidN%2C Cro/CI family	NA	K23779	sutR; XRE family transcriptional regulator, regulator of sulfur utilization	56	03000	Transcription factors [BR:ko03000],	09182	09180
D|1136176.5.peg.2070	1	2357963	2358841	-	879	456	421	411	427	458	453	117	126	103	105	122	101	307.285	294.582	290.112	314.882	302.829	295.776	177.187	176.247	135.405	161.007	172.691	151.22	231.602	0.892972	0.0754076	11.8419	2.37e-32	1.96e-31	Transcriptional regulator	NA	K13636	dsdC; LysR family transcriptional regulator, D-serine deaminase activator	85	03000	Transcription factors [BR:ko03000],	09182	09180
D|1136176.5.peg.3644	2	782715	783722	-	1008	7071.5	6844.5	6820.5	6728	7739.5	7376.5	1673.5	1923.5	2075	1846	1912.5	1526	4764.94	4788.89	4814.02	4961.41	5117.01	4815.99	2533.62	2689.87	2727.82	2830.66	2706.44	2284.77	3752.95	0.891342	0.0499682	17.8382	3.57e-71	9.53e-70	Transcriptional regulator%2C LacI family	NA	K02529	lacI, galR; LacI family transcriptional regulator	144	03000	Transcription factors [BR:ko03000],	09182	09180
D|1136176.5.peg.2162	1	2472675	2474141	-	1467	1114	929	907	923	1014	992	310	353	306	268	275	294	750.693	650.04	640.222	680.646	670.455	647.704	469.469	493.772	402.272	410.952	389.262	440.184	553.806	0.633107	0.0690413	9.16998	4.73e-20	2.49e-19	Flagellar regulatory protein FleQ	NA	K10941	flrA, fleQ, flaK; sigma-54 dependent transcriptional regulator, flagellar regulatory protein	301	02020 05111 02025 02040 03000 02035	Two-component system [PATH:ko02020], Biofilm formation - Vibrio cholerae [PATH:ko05111], Biofilm formation - Pseudomonas aeruginosa [PATH:ko02025], Flagellar assembly [PATH:ko02040], Transcription factors [BR:ko03000], Bacterial motility proteins [BR:ko02035],	09132 09145 09142 09182 09183	09130 09140 09180
D|1136176.5.peg.142	1	184108	184548	+	441	740	680	750	722	778	763	225	284	236	250	238	215	498.665	475.81	529.401	532.423	514.412	498.183	340.743	397.256	310.249	383.351	336.889	321.904	428.274	0.545358	0.066142	8.24527	1.65e-16	7.1e-16	transcriptional regulator%2C MerR family	NA	K13638	zntR; MerR family transcriptional regulator, Zn(II)-responsive regulator of zntA	66	03000	Transcription factors [BR:ko03000],	09182	09180
D|1136176.5.peg.3784	2	928342	929856	+	1515	80	75	78	69	81	88	36	29	22	23	31	19	53.9097	52.479	55.0577	50.8825	53.5571	57.4576	54.5189	40.5648	28.9215	35.2683	43.8805	28.4473	46.2454	0.487525	0.149295	3.26551	0.00109269	0.00184111	Transcriptional regulator%2C GntR family domain / Aspartate aminotransferase (EC 2.6.1.1)	KEGG_ENZYME:2.6.1.1	K00375	K00375; GntR family transcriptional regulator / MocR family aminotransferase	255	03000	Transcription factors [BR:ko03000],	09182	09180
D|1136176.5.peg.2036	1	2325730	2326170	-	441	1666	1580	1558	1718	1643	1602	649	599	474	756	431	425	1122.67	1105.56	1099.74	1266.9	1086.35	1045.99	982.855	837.874	623.127	1159.25	610.08	636.321	964.727	0.472803	0.15061	3.13925	0.00169379	0.00276852	Redox-sensitive transcriptional activator SoxR	NA	K13639	soxR; MerR family transcriptional regulator, redox-sensitive transcriptional activator SoxR	72	03000	Transcription factors [BR:ko03000],	09182	09180
D|1136176.5.peg.2943	1	3387096	3387977	-	882	1172	1096.5	1068.5	1070	1138	1142	310.5	369	476	326	425.5	442.5	789.777	766.894	753.867	789.047	752.444	745.643	469.469	516.153	625.756	499.89	601.587	661.774	664.358	0.444976	0.0781567	5.69338	1.25e-08	3.3e-08	Chromosome (plasmid) partitioning protein ParB	NA	K03497	parB, spo0J; ParB family transcriptional regulator, chromosome partitioning protein	162	03000 03036 04812	Transcription factors [BR:ko03000], Chromosome and associated proteins [BR:ko03036], Cytoskeleton proteins [BR:ko04812],	09182 09183	09180
D|1136176.5.peg.2783	1	3202632	3202823	+	192	35	35.5	27.5	33.5	26	28.5	8.5	17	5	15	12	11	23.5855	24.4902	19.0584	24.3351	17.1912	18.282	12.1153	23.7794	6.57307	23.0011	16.986	16.4695	18.8222	0.367049	0.235324	1.55976	0.118816	0.149917	hypothetical protein	NA	K07733	alpA; prophage regulatory protein	10	03000	Transcription factors [BR:ko03000],	09182	09180
D|1136176.5.peg.3812	2	965752	968889	+	3138	6309.5	6021	6105	5790	6464.5	6398.5	2169	2378.5	2620.5	2150.5	2296	2166	4251.45	4213.02	4309.32	4269.7	4273.99	4177.43	3284.77	3326.32	3444.29	3296.82	3249.99	3242.99	3778.34	0.360819	0.0239677	15.0544	3.23e-51	5.16e-50	Proline dehydrogenase (EC 1.5.99.8) (Proline oxidase) / Delta-1-pyrroline-5-carboxylate dehydrogenase (EC 1.5.1.12)	KEGG_ENZYME:1.5.99.8,KEGG_ENZYME:1.5.1.12	K13821	putA; RHH-type transcriptional regulator, proline utilization regulon repressor / proline dehydrogenase / delta 1-pyrroline-5-carboxylate dehydrogenase [EC:1.5.5.2 1.2.1.88]	643	00250 00330 03000	Alanine, aspartate and glutamate metabolism [PATH:ko00250], Arginine and proline metabolism [PATH:ko00330], Transcription factors [BR:ko03000],	09105 09182	09100 09180
D|1136176.5.peg.3896	2	1058834	1059832	+	999	599	567	568	502	591	574	193	240	253	196	200	216	403.649	396.742	400.933	370.189	390.768	374.78	292.282	335.709	332.597	300.547	283.1	323.401	350.391	0.321885	0.0616341	5.22251	1.77e-07	4.3e-07	AscBF operon repressor	NA	K03487	ascG; LacI family transcriptional regulator, asc operon repressor	176	03000	Transcription factors [BR:ko03000],	09182	09180
D|1136176.5.peg.3961	2	1128126	1128566	+	441	198.5	208.5	188.5	174	206.5	216.5	74	81	81	77	86	63	133.427	145.542	132.703	128.312	136.207	141.032	112.067	113.302	106.484	118.072	121.733	94.3252	123.6	0.295999	0.0921432	3.21238	0.0013164	0.00219495	Transcriptional regulator%2C AsnC family	NA	K03719	lrp; Lrp/AsnC family transcriptional regulator, leucine-responsive regulatory protein	85	03000 03036	Transcription factors [BR:ko03000], Chromosome and associated proteins [BR:ko03036],	09182	09180
D|1136176.5.peg.1596	1	1869741	1869929	-	189	14	14	18	19	14	17	8	2	5	8	7	8	9.4342	9.79609	12.7056	14.0111	9.25678	11.0998	12.1153	2.79757	6.57307	12.2672	9.9085	11.9778	10.1619	0.267475	0.302943	0.882921	0.377279	0.425183	hypothetical protein	NA	K07733	alpA; prophage regulatory protein	24	03000	Transcription factors [BR:ko03000],	09182	09180
D|1136176.5.peg.2621	1	3006618	3007265	+	648	2110	1988	2114	1831	2075	2290	696	747	938	894	914	788	1421.87	1391.04	1492.21	1350.23	1371.99	1495.2	1054.03	1044.89	1233.11	1370.86	1293.77	1179.81	1308.25	0.248166	0.0695162	3.5699	0.000357	0.000635	Transcriptional regulator%2C LuxR family	NA	K04333	csgD; LuxR family transcriptional regulator, csgAB operon transcriptional regulatory protein	16	02026 03000	Biofilm formation - Escherichia coli [PATH:ko02026], Transcription factors [BR:ko03000],	09145 09182	09140 09180
D|1136176.5.peg.3685	2	830961	832409	-	1449	756	652	675	666	743	707	258	333	280	292	294	289	509.447	456.218	476.461	491.127	491.27	461.619	390.719	465.796	368.092	447.754	416.157	432.698	450.613	0.196235	0.0628707	3.12125	0.00180083	0.00293314	ADA regulatory protein	NA	K13529	ada-alkA; AraC family transcriptional regulator, regulatory protein of adaptative response / DNA-3-methyladenine glycosylase II [EC:3.2.2.21]	213	03410 03000 03400	Base excision repair [PATH:ko03410], Transcription factors [BR:ko03000], DNA repair and recombination proteins [BR:ko03400],	09124 09182	09120 09180
D|1136176.5.peg.2776	1	3195700	3196290	+	591	362	330	309	309	362	352	122	158	152	137	131	149	243.941	230.908	218.113	227.865	239.354	229.83	184.759	221.008	199.821	210.076	185.43	223.087	217.849	0.184185	0.0730954	2.51979	0.0117425	0.0172988	Transcriptional regulator SlmA%2C TetR family	NA	K05501	slmA, ttk; TetR/AcrR family transcriptional regulator	146	03000 03036	Transcription factors [BR:ko03000], Chromosome and associated proteins [BR:ko03036],	09182	09180
D|1136176.5.peg.3401	2	505751	506230	-	480	235	216	238	213	234	233	97	90	106	97	85	100	158.36	151.14	167.997	157.072	154.72	152.132	146.898	125.891	139.349	148.74	120.317	149.723	147.695	0.182488	0.0850401	2.14591	0.0318804	0.0440312	Transcriptional regulator%2C AsnC family	NA	K03719	lrp; Lrp/AsnC family transcriptional regulator, leucine-responsive regulatory protein	19	03000 03036	Transcription factors [BR:ko03000], Chromosome and associated proteins [BR:ko03036],	09182	09180
D|1136176.5.peg.2792	1	3211792	3213045	-	1254	1347	1331.5	1290.5	1286	1421	1435.5	444.5	569	687	533.5	663.5	591.5	907.705	931.328	910.57	948.332	939.563	936.95	672.4	795.91	903.14	817.305	938.476	884.86	882.212	0.152443	0.0690036	2.2092	0.0271608	0.0378733	DNA-cytosine methyltransferase (EC 2.1.1.37)	KEGG_ENZYME:2.1.1.37	K00558	DNMT1, dcm; DNA (cytosine-5)-methyltransferase 1 [EC:2.1.1.37]	169	00270 05206 03000 03032 03036 02048	Cysteine and methionine metabolism [PATH:ko00270], MicroRNAs in cancer [PATH:ko05206], Transcription factors [BR:ko03000], DNA replication proteins [BR:ko03032], Chromosome and associated proteins [BR:ko03036], Prokaryotic defense system [BR:ko02048],	09105 09161 09182 09183	09100 09160 09180
D|1136176.5.peg.3884	2	1045978	1047498	-	1521	78	68	75	85	75	70.5	32	29	37	29	40	28	52.562	47.581	52.9401	62.6813	49.5899	45.7049	48.4613	40.5648	48.6407	44.4687	56.62	41.9223	49.3114	0.143239	0.142152	1.00765	0.313623	0.360624	Oligopeptide ABC transporter%2C periplasmic oligopeptide-binding protein OppA (TC 3.A.1.5.1)	NA	K11925	sgrR; SgrR family transcriptional regulator	17	03000	Transcription factors [BR:ko03000],	09182	09180
D|1136176.5.peg.4327	2	1560371	1561963	-	1593	2347	2104	2176	2295	2271	2316	874	1005	1143	926	1050	897	1581.58	1472.21	1535.97	1692.4	1501.58	1512.18	1323.6	1405.78	1502.6	1419.93	1486.27	1343.01	1481.43	0.13134	0.0490251	2.67903	0.00738352	0.0111716	Functional role page for Anaerobic nitric oxide reductase transcription regulator NorR	NA	K12266	norR; anaerobic nitric oxide reductase transcription regulator	295	03000	Transcription factors [BR:ko03000],	09182	09180
D|1136176.5.peg.1873	1	2158606	2158992	-	387	1899	1608	1582	1739	1816.5	1725.5	789.5	769	734.5	896	653.5	720	1279.68	1125.15	1116.68	1282.39	1200.74	1126.3	1194.87	1075.67	964.927	1373.93	924.321	1078	1145.22	0.109873	0.0915055	1.20073	0.229857	0.272471	Phage shock protein C	NA	K03973	pspC; phage shock protein C	59	03000 02048	Transcription factors [BR:ko03000], Prokaryotic defense system [BR:ko02048],	09182 09183	09180
D|1136176.5.peg.625	1	713651	714559	+	909	386.5	418	397.5	381.5	411	444	187.5	169.5	194.5	152	204.5	180	260.114	292.483	280.23	280.96	271.752	289.9	283.196	236.395	255.035	233.077	288.762	269.501	270.117	0.0975835	0.0698178	1.39769	0.162206	0.198828	Glycine cleavage system transcriptional activator GcvA	NA	K03566	gcvA; LysR family transcriptional regulator, glycine cleavage system transcriptional activator	241	02026 03000	Biofilm formation - Escherichia coli [PATH:ko02026], Transcription factors [BR:ko03000],	09145 09182	09140 09180
D|1136176.5.peg.143	1	184637	184933	-	297	650.5	672.5	650	623.5	636	646	274.5	281	299	257	332.5	292.5	438.016	470.212	458.814	459.417	420.522	421.791	414.95	393.059	393.07	394.085	469.946	437.19	430.923	0.092538	0.0615617	1.50318	0.132794	0.166153	DNA-binding protein Fis	NA	K03557	fis; Fis family transcriptional regulator, factor for inversion stimulation protein	87	05111 03000 03036 03400	Biofilm formation - Vibrio cholerae [PATH:ko05111], Transcription factors [BR:ko03000], Chromosome and associated proteins [BR:ko03036], DNA repair and recombination proteins [BR:ko03400],	09145 09182	09140 09180
D|1136176.5.peg.3924	2	1088952	1089293	-	342	392	370	420	308	415	437	196	169	167	188	155	173	264.158	258.897	296.465	227.128	274.397	285.329	296.825	236.395	219.541	288.28	219.402	259.02	260.486	0.0842273	0.094465	0.891624	0.372595	0.420619	Arsenical resistance operon repressor	NA	K03892	arsR; ArsR family transcriptional regulator, arsenate/arsenite/antimonite-responsive transcriptional repressor	16	03000	Transcription factors [BR:ko03000],	09182	09180
D|1136176.5.peg.462	1	516469	517230	+	762	1229	1217	1090	1037	1167	1210	451	480	609	435	621	566	828.188	851.56	769.396	764.712	771.618	790.042	683.001	671.418	800.6	667.031	879.025	847.43	777.002	0.0696859	0.0775388	0.898722	0.368801	0.417046	Transcriptional repressor for pyruvate dehydrogenase complex	NA	K05799	pdhR; GntR family transcriptional regulator, transcriptional repressor for pyruvate dehydrogenase complex	179	03000	Transcription factors [BR:ko03000],	09182	09180
D|1136176.5.peg.2556	1	2931874	2932833	-	960	11226	9477	9407	9819	10242	10054	10343	5308	2454	4500	2027	2412	7564.88	6631.25	6640.1	7240.8	6771.99	6564.53	15663.6	7424.76	3226.06	6900.32	2869.22	3611.31	6759.07	0.0611582	0.404005	0.15138	0.879676	0.898055	Probable transcriptional activator for leuABCD operon	NA	K05798	leuO; LysR family transcriptional regulator, transcriptional activator for leuABCD operon	196	03000	Transcription factors [BR:ko03000],	09182	09180
D|1136176.5.peg.1765	1	2040057	2041601	-	1545	1066	1028	1017	958	1049	1134	441	447	579	420	499	508	718.347	719.313	717.868	706.455	693.597	740.419	667.857	625.258	761.162	644.03	706.334	760.591	705.103	0.0437757	0.0548578	0.797984	0.42488	0.473085	Transcriptional repressor protein TyrR	NA	K03721	tyrR; transcriptional regulator of aroF, aroG, tyrA and aromatic amino acid transport	295	03000	Transcription factors [BR:ko03000],	09182	09180
D|1136176.5.peg.4275	2	1503757	1504665	+	909	423	394	368	388	410	443	238	196	194	190	165	143	285.048	275.69	259.759	286.122	271.091	289.247	360.431	274.162	255.035	291.347	233.557	214.103	274.633	0.0352168	0.101963	0.345389	0.729802	0.766541	Transcriptional regulator%2C AraC family	NA	K13653	K13653; AraC family transcriptional regulator	111	03000	Transcription factors [BR:ko03000],	09182	09180
D|1136176.5.peg.906	1	1018089	1019093	-	1005	184	151	139	171	162	164	81	107	66	61	80	60	123.992	105.658	98.1157	126.1	107.114	107.08	122.668	149.67	86.7645	93.5377	113.24	89.8335	110.314	0.0261541	0.128885	0.202925	0.839194	0.862417	Galactose operon repressor%2C GalR-LacI family of transcriptional regulators	NA	K02529	lacI, galR; LacI family transcriptional regulator	174	03000	Transcription factors [BR:ko03000],	09182	09180
D|1136176.5.peg.119	1	156604	157569	+	966	1939.5	1873.5	2028.5	1901	2097	2091	888.5	1042.5	914	958.5	992	837.5	1306.64	1310.58	1431.5	1401.85	1386.53	1365.27	1344.8	1457.54	1201.56	1469	1404.18	1253.18	1361.05	0.0131556	0.0561254	0.234397	0.814677	0.841881	Biotin--protein ligase (EC 6.3.4.9%2C EC 6.3.4.10%2C EC 6.3.4.11%2C EC 6.3.4.15) / Biotin operon repressor	KEGG_ENZYME:6.3.4.9,KEGG_ENZYME:6.3.4.10,KEGG_ENZYME:6.3.4.11,KEGG_ENZYME:6.3.4.15	K03524	birA; BirA family transcriptional regulator, biotin operon repressor / biotin---[acetyl-CoA-carboxylase] ligase [EC:6.3.4.15]	186	00780 03000	Biotin metabolism [PATH:ko00780], Transcription factors [BR:ko03000],	09108 09182	09100 09180
D|1136176.5.peg.4196	2	1414787	1415743	-	957	95	70	99	78	87	88	31	49	45	37	54	30	64.0178	48.9804	69.8809	57.5193	57.5242	57.4576	46.9469	68.5406	59.1576	56.736	76.437	44.9168	59.0096	0.00530476	0.1404	0.0377832	0.969861	0.975535	Glycine cleavage system transcriptional activator	NA	K03566	gcvA; LysR family transcriptional regulator, glycine cleavage system transcriptional activator	48	02026 03000	Biofilm formation - Escherichia coli [PATH:ko02026], Transcription factors [BR:ko03000],	09145 09182	09140 09180
D|1136176.5.peg.4567	3	70397	70654	+	258	32	28	35	28	42	38	19	15	16	25	10	13	21.5639	19.5922	24.7054	20.648	27.7703	24.8112	28.7739	20.9818	21.0338	38.3351	14.155	19.4639	23.4862	-0.0225926	0.206694	-0.109304	0.912961	0.928282	hypothetical protein	NA	K03557	fis; Fis family transcriptional regulator, factor for inversion stimulation protein	14	05111 03000 03036 03400	Biofilm formation - Vibrio cholerae [PATH:ko05111], Transcription factors [BR:ko03000], Chromosome and associated proteins [BR:ko03036], DNA repair and recombination proteins [BR:ko03400],	09145 09182	09140 09180
D|1136176.5.peg.230	1	287646	288278	-	633	6388	6428	6069	5777	6840	6786	2852	2993	3739	2650	3233	3132	4304.69	4497.8	4283.91	4260.12	4522.6	4430.76	4319.11	4186.57	4915.34	4063.52	4576.31	4689.31	4420.84	-0.0247325	0.0493278	-0.501391	0.616096	0.663092	Cyclic AMP receptor protein	NA	K10914	crp; CRP/FNR family transcriptional regulator, cyclic AMP receptor protein	209	02020 02024 05111 02025 02026 03000	Two-component system [PATH:ko02020], Quorum sensing [PATH:ko02024], Biofilm formation - Vibrio cholerae [PATH:ko05111], Biofilm formation - Pseudomonas aeruginosa [PATH:ko02025], Biofilm formation - Escherichia coli [PATH:ko02026], Transcription factors [BR:ko03000],	09132 09145 09182	09130 09140 09180
D|1136176.5.peg.1605	1	1875232	1875471	-	240	7	16	9	8	10	13	4	4	7	7	3	6	4.7171	11.1955	6.35281	5.89942	6.61198	8.48805	6.05766	5.59515	9.2023	10.7338	4.2465	8.98335	7.34031	-0.0462406	0.350221	-0.132033	0.894959	0.911574	phage transcriptional regulator%2C AlpA	NA	K07733	alpA; prophage regulatory protein	17	03000	Transcription factors [BR:ko03000],	09182	09180
D|1136176.5.peg.2059	1	2344001	2344456	-	456	408	323	325	348	353	351	179	157	150	197	182	169	274.94	226.01	229.407	256.625	233.403	229.177	271.08	219.61	197.192	302.081	257.621	253.031	245.848	-0.0464571	0.0976516	-0.475743	0.634257	0.679959	Putative HTH-type transcriptional regulator ybaO	NA	K05800	ybaO; Lrp/AsnC family transcriptional regulator	112	03000	Transcription factors [BR:ko03000],	09182	09180
D|1136176.5.peg.2268	1	2586940	2587248	-	309	463.5	508.5	460	436	511	501.5	186.5	207.5	294	243.5	258.5	237	312.002	355.458	324.699	321.518	337.872	327.116	281.681	289.549	386.497	372.617	365.199	354.842	335.754	-0.0523355	0.0811185	-0.645173	0.518815	0.566935	Cell division protein BolA	NA	K05527	bolA; BolA family transcriptional regulator, general stress-responsive regulator	84	03000	Transcription factors [BR:ko03000],	09182	09180
D|1136176.5.peg.2893	1	3331073	3331687	+	615	7733	7071	6903	6682.5	7488	7454	3997	3882	3460	3703	3084.5	3394	5211.05	4947.72	4872.61	4927.49	4951.05	4866.92	6053.12	5430.09	4548.57	5678.2	4365.4	5081.58	5077.82	-0.0651575	0.0767746	-0.848686	0.396056	0.44451	Transcription regulator of multidrug efflux pump operon%2C TetR (AcrR) family	NA	K18136	acrR; TetR/AcrR family transcriptional regulator, multidrug resistance operon repressor	58	01501 03000	beta-Lactam resistance [PATH:ko01501], Transcription factors [BR:ko03000],	09175 09182	09160 09180
D|1136176.5.peg.3457	2	568067	569851	-	1785	4711	4530	4485	4291	4787	4759	2197	2359	2445	2347	2193	2296	3174.61	3169.73	3165.82	3164.3	3165.16	3107.28	3327.17	3299.74	3214.23	3598.9	3104.19	3437.63	3244.06	-0.0761763	0.035818	-2.12676	0.03344	0.0460209	putative transport protein	NA	K11925	sgrR; SgrR family transcriptional regulator	89	03000	Transcription factors [BR:ko03000],	09182	09180
D|1136176.5.peg.610	1	699087	699536	+	450	190	191	180	187	186.5	199	82.5	103	105.5	88.5	103	91.5	128.036	133.647	127.056	137.899	122.983	129.932	124.182	144.075	138.035	134.94	145.796	136.248	133.569	-0.0814927	0.0861334	-0.946122	0.344087	0.392252	Ribonucleotide reductase transcriptional regulator NrdR	NA	K07738	nrdR; transcriptional repressor NrdR	133	03000	Transcription factors [BR:ko03000],	09182	09180
D|1136176.5.peg.3635	2	769232	770245	-	1014	1120	1049	1015	948	1037	1105	430	558	579	525	558	536	754.736	734.007	716.456	699.081	685.663	721.484	651.199	780.523	761.162	805.037	789.849	802.513	741.809	-0.0906391	0.0545064	-1.66291	0.0963308	0.123323	Maltose operon transcriptional repressor MalR%2C LacI family	NA	K02529	lacI, galR; LacI family transcriptional regulator	127	03000	Transcription factors [BR:ko03000],	09182	09180
D|1136176.5.peg.3578	2	705579	706565	+	987	354	294	321	314	357	368	191	200	162	175	151	140	238.55	205.718	226.584	231.552	236.048	240.277	289.253	279.757	212.968	268.346	213.74	209.612	237.7	-0.0936824	0.0919058	-1.01933	0.308046	0.354826	Sucrose operon repressor ScrR%2C LacI family	NA	K03484	scrR; LacI family transcriptional regulator, sucrose operon repressor	153	03000	Transcription factors [BR:ko03000],	09182	09180
D|1136176.5.peg.76	1	103936	104277	+	342	25	20	19	22	22	24	15	13	5	17	8	10	16.8468	13.9944	13.4115	16.2234	14.5464	15.6702	22.7162	18.1842	6.57307	26.0679	11.324	14.9723	15.8775	-0.116786	0.245138	-0.476408	0.633783	0.679608	Transcriptional regulator%2C ArsR family	NA	K03892	arsR; ArsR family transcriptional regulator, arsenate/arsenite/antimonite-responsive transcriptional repressor	55	03000	Transcription factors [BR:ko03000],	09182	09180
D|1136176.5.peg.1876	1	2160204	2161226	+	1023	2262	2044	2083	1977	2219	2230	1054	1191	1127	1128	1102	1062	1524.3	1430.23	1470.32	1457.89	1467.2	1456.03	1596.19	1665.96	1481.57	1729.68	1559.88	1590.05	1535.78	-0.127102	0.0405008	-3.13825	0.00169962	0.00277609	Psp operon transcriptional activator	NA	K03974	pspF; psp operon transcriptional activator	208	03000	Transcription factors [BR:ko03000],	09182	09180
D|1136176.5.peg.781	1	873282	874496	-	1215	2082	1977	2005	1805	2177.5	2103.5	1156.5	1051.5	1152.5	1035.5	1101.5	936	1403	1383.35	1415.27	1331.06	1439.43	1373.11	1750.66	1470.13	1514.44	1587.07	1558.47	1401.4	1468.95	-0.152958	0.0513754	-2.97726	0.00290838	0.00461721	N-acetylglucosamine-6P-responsive transcriptional repressor NagC%2C ROK family	NA	K02565	nagC; N-acetylglucosamine repressor	274	03000	Transcription factors [BR:ko03000],	09182	09180
D|1136176.5.peg.555	1	637791	638747	-	957	321	310	334	315	318	317	182	190	182	188	154	138	216.313	216.913	235.76	232.29	210.261	206.978	275.624	265.77	239.26	288.28	217.987	206.617	234.338	-0.179226	0.0840303	-2.13287	0.0329354	0.0453803	putative transcriptional regulator%2C LysR family	NA	K03566	gcvA; LysR family transcriptional regulator, glycine cleavage system transcriptional activator	76	02026 03000	Biofilm formation - Escherichia coli [PATH:ko02026], Transcription factors [BR:ko03000],	09145 09182	09140 09180
D|1136176.5.peg.2431	1	2779057	2779350	-	294	201	195	212	199	198	208	96	119	115	95	134	98	135.448	136.446	149.644	146.748	130.917	135.809	145.384	166.456	151.181	145.673	189.677	146.728	148.343	-0.182053	0.0874506	-2.08178	0.0373629	0.0510797	Transcriptional activator HlyU	NA	K22042	hlyU; ArsR family transcriptional regulator, virulence genes transcriptional regulator	57	03000	Transcription factors [BR:ko03000],	09182	09180
D|1136176.5.peg.2550	1	2923851	2924510	+	660	379	434	356	351	458	419	243	216	233	242	183	176	255.397	303.679	251.289	258.837	302.829	273.576	368.003	302.138	306.305	371.084	259.036	263.512	292.974	-0.182702	0.100454	-1.81876	0.0689478	0.0903347	Transcriptional regulator LuxZ	NA	K15735	csiR; GntR family transcriptional regulator, carbon starvation induced regulator	107	03000	Transcription factors [BR:ko03000],	09182	09180
D|1136176.5.peg.379	1	424929	425492	-	564	2115	1921	1949	1965	2134	2161	1049	1210	1115	1198	1016	1032	1425.24	1344.16	1375.74	1449.04	1411	1410.98	1588.62	1692.53	1465.79	1837.02	1438.15	1545.14	1498.62	-0.184316	0.0593173	-3.10729	0.00188809	0.00306773	UPF0301 protein YqgE	NA	K07735	algH; putative transcriptional regulator	165	03000	Transcription factors [BR:ko03000],	09182	09180
D|1136176.5.peg.4378	2	1615721	1616437	-	717	185	161	163	177	166	178	95	90	79	107	95	98	124.666	112.655	115.057	130.525	109.759	116.221	143.869	125.891	103.855	164.074	134.472	146.728	127.314	-0.202672	0.100994	-2.00678	0.0447731	0.0605036	Transcriptional regulator of succinyl CoA synthetase operon	NA	K11922	mngR, farR; GntR family transcriptional regulator, mannosyl-D-glycerate transport/metabolism system repressor	130	03000	Transcription factors [BR:ko03000],	09182	09180
D|1136176.5.peg.106	1	129169	129810	+	642	971	936	933.5	835.5	977.5	1003.5	447	568.5	575.5	491	555	550.5	654.329	654.939	658.575	615.752	645.991	654.886	676.944	794.511	755.903	752.902	785.602	823.474	706.151	-0.240776	0.0493926	-4.87474	1.09e-06	2.48e-06	Unsaturated fatty acid biosythesis repressor FabR%2C TetR family	NA	K22105	fabR; TetR/AcrR family transcriptional regulator, fatty acid biosynthesis regulator	152	03000	Transcription factors [BR:ko03000],	09182	09180
D|1136176.5.peg.968	1	1092579	1093796	+	1218	1568	1452	1430	1396	1569	1561	877	854	975	768	856	755	1056.63	1015.99	1009.39	1029.45	1037.42	1019.22	1328.14	1194.56	1281.75	1177.65	1211.67	1130.41	1124.36	-0.248203	0.0428608	-5.79091	7e-09	1.89e-08	Mlc%2C transcriptional repressor of MalT (the transcriptional activator of maltose regulon) and manXYZ operon	NA	K15545	mlc; transcriptional regulator of PTS gene	245	03000	Transcription factors [BR:ko03000],	09182	09180
D|1136176.5.peg.1083	1	1227302	1228189	-	888	29	33	32	25	35	33	13	17	27	16	15	18	19.5423	23.0908	22.5878	18.4357	23.1419	21.5466	19.6874	23.7794	35.4946	24.5345	21.2325	26.9501	23.3353	-0.248304	0.194965	-1.27358	0.202812	0.243395	Transcriptional regulator%2C LysR family	NA	K03566	gcvA; LysR family transcriptional regulator, glycine cleavage system transcriptional activator	105	02026 03000	Biofilm formation - Escherichia coli [PATH:ko02026], Transcription factors [BR:ko03000],	09145 09182	09140 09180
D|1136176.5.peg.2380	1	2712070	2712975	-	906	194	180	180	165	202	182	102	104	113	105	95	106	130.731	125.95	127.056	121.676	133.562	118.833	154.47	145.474	148.551	161.007	134.472	158.706	138.374	-0.249854	0.08516	-2.93394	0.00334691	0.00526656	Hydrogen peroxide-inducible genes activator	NA	K04761	oxyR; LysR family transcriptional regulator, hydrogen peroxide-inducible genes activator	202	02026 03000	Biofilm formation - Escherichia coli [PATH:ko02026], Transcription factors [BR:ko03000],	09145 09182	09140 09180
D|1136176.5.peg.3854	2	1018847	1019425	-	579	67	79	78	62	76	64	33	39	30	57	40	42	45.1494	55.2779	55.0577	45.7205	50.2511	41.7873	49.9757	54.5527	39.4384	87.4041	56.62	62.8835	53.6765	-0.251234	0.157008	-1.60014	0.109568	0.138928	Transcriptional regulator	NA	K16137	nemR; TetR/AcrR family transcriptional regulator, transcriptional repressor for nem operon	65	03000	Transcription factors [BR:ko03000],	09182	09180
D|1136176.5.peg.4522	3	25373	26458	-	1086	6241	5936.5	6172	5885.5	6596	6529	3327	3788	4019	3439	3509.5	3175	4205.63	4153.54	4356.62	4339.76	4361.26	4262.96	5038.46	5298.61	5283.43	5273.38	4966.99	4753.69	4691.19	-0.2538	0.0339405	-7.4778	7.56e-14	2.75e-13	Chromosome (plasmid) partitioning protein ParB	NA	K03497	parB, spo0J; ParB family transcriptional regulator, chromosome partitioning protein	69	03000 03036 04812	Transcription factors [BR:ko03000], Chromosome and associated proteins [BR:ko03036], Cytoskeleton proteins [BR:ko04812],	09182 09183	09180
D|1136176.5.peg.3817	2	972534	973022	+	489	630	551	569	523	619	632	287	324	344	361	344	346	424.539	385.546	401.639	385.675	409.282	412.65	434.637	453.207	452.227	553.559	486.932	518.04	443.161	-0.258646	0.0641446	-4.03224	5.52e-05	0.000107	PutR%2C transcriptional activator of PutA and PutP	NA	K03719	lrp; Lrp/AsnC family transcriptional regulator, leucine-responsive regulatory protein	66	03000 03036	Transcription factors [BR:ko03000], Chromosome and associated proteins [BR:ko03036],	09182	09180
D|1136176.5.peg.4044	2	1238062	1238586	+	525	88.5	100	79.5	69	80	93.5	50	43	42.5	46.5	56.5	60	59.3007	69.9721	55.7636	50.8825	52.8959	60.7222	75.7208	60.1479	55.2138	70.5366	79.268	89.8335	65.0215	-0.294706	0.132598	-2.22254	0.0262465	0.0366977	Transcriptional regulator%2C MerR family	NA	K21744	tipA; MerR family transcriptional regulator, thiopeptide resistance regulator	19	03000	Transcription factors [BR:ko03000],	09182	09180
D|1136176.5.peg.2409	1	2753417	2753710	-	294	32	31	47	42	36	38	31	20	26	15	21	21	21.5639	21.6913	33.1758	30.972	23.8031	24.8112	46.9469	27.9757	34.18	23.0011	29.7255	31.4417	29.1074	-0.312333	0.188336	-1.65838	0.0972404	0.124418	Transcriptional repressor protein TrpR	NA	K03720	trpR; TrpR family transcriptional regulator, trp operon repressor	35	03000	Transcription factors [BR:ko03000],	09182	09180
D|1136176.5.peg.4351	2	1584725	1585183	+	459	360	274	286	299	304	341	141	197	215	161	221	181	242.594	191.723	201.878	220.491	201.004	222.648	213.533	275.561	282.642	246.878	312.825	270.998	240.231	-0.325781	0.0920873	-3.53774	0.000404	0.000714	Transcriptional regulator%2C AsnC family	NA	K03719	lrp; Lrp/AsnC family transcriptional regulator, leucine-responsive regulatory protein	69	03000 03036	Transcription factors [BR:ko03000], Chromosome and associated proteins [BR:ko03036],	09182	09180
D|1136176.5.peg.3687	2	833067	833960	-	894	2071	2039	1923	1775	1942	2139	995	1088	1317	1229	1251	1266	1395.59	1426.73	1357.38	1308.93	1284.05	1396.61	1506.84	1521.88	1731.35	1884.55	1770.79	1895.49	1540.02	-0.335663	0.0657769	-5.10306	3.34e-07	7.98e-07	Transcriptional regulator%2C LysR family	NA	K23773	hdfR; LysR family transcriptional regulator, flagellar master operon regulator	146	03000	Transcription factors [BR:ko03000],	09182	09180
D|1136176.5.peg.1017	1	1154441	1155445	-	1005	2011.5	1985	1984	1836.5	2077.5	2160.5	1241.5	1159.5	1300	1322.5	1058	1303	1355.16	1388.95	1400.44	1353.92	1373.31	1410.32	1879.39	1621.19	1709	2027.16	1497.6	1950.88	1580.61	-0.366874	0.0702476	-5.22258	1.76e-07	4.3e-07	Purine nucleotide synthesis repressor	NA	K03604	purR; LacI family transcriptional regulator, purine nucleotide synthesis repressor	215	03000	Transcription factors [BR:ko03000],	09182	09180
D|1136176.5.peg.1402	1	1649275	1650021	+	747	12482	12003	11923	10872	12518	12534	7926	7580	7459	8243	6612	6698	8411.26	8398.75	8416.07	8017.31	8276.88	8183.79	12003.3	10602.8	9805.71	12639.9	9359.28	10028.4	9511.95	-0.374469	0.0727964	-5.14406	2.69e-07	6.47e-07	Fumarate and nitrate reduction regulatory protein	NA	K01420	fnr; CRP/FNR family transcriptional regulator, anaerobic regulatory protein	219	03000	Transcription factors [BR:ko03000],	09182	09180
D|1136176.5.peg.642	1	731207	732151	+	945	807	794	783	725	828	818	471	474	566	459	486	505	543.814	555.578	552.695	534.635	547.472	534.094	713.29	663.025	744.072	703.833	687.933	756.099	628.045	-0.385107	0.0461094	-8.35202	6.71e-17	2.98e-16	Trehalose operon transcriptional repressor	NA	K03485	treR; LacI family transcriptional regulator, trehalose operon repressor	171	03000	Transcription factors [BR:ko03000],	09182	09180
D|1136176.5.peg.759	1	852420	852815	+	396	402	393	382	363	413	412	206	249	310	234	286	196	270.896	274.99	269.642	267.686	273.075	269.006	311.97	348.298	407.53	358.817	404.833	293.456	312.517	-0.389434	0.0784623	-4.96332	6.93e-07	1.61e-06	HTH-type transcriptional regulator cueR	NA	K19591	cueR; MerR family transcriptional regulator, copper efflux regulator	65	03000 01504	Transcription factors [BR:ko03000], Antimicrobial resistance genes [BR:ko01504],	09182 09183	09180
D|1136176.5.peg.3571	2	696258	698063	+	1806	7061	6546	7151	6660	7319	7290	3978	4432	4886	4183	4461	4366	4758.21	4580.37	5047.66	4911.27	4839.31	4759.84	6024.34	6199.43	6423.21	6414.23	6314.54	6536.89	5567.44	-0.39187	0.0321208	-12.1999	3.11e-34	2.78e-33	Sigma-54 dependent transcriptional regulator	NA	K21405	acoR; sigma-54 dependent transcriptional regulator, acetoin dehydrogenase operon transcriptional activator AcoR	221	03000	Transcription factors [BR:ko03000],	09182	09180
D|1136176.5.peg.4070	2	1270870	1271652	-	783	963	899	906	958	968	997	526	597	622	592	576	659	648.938	629.049	639.517	706.455	640.04	650.968	796.582	835.076	817.69	907.775	815.328	986.672	756.174	-0.397553	0.0593309	-6.70061	2.08e-11	6.56e-11	Transcriptional regulator%2C IclR family	NA	K13641	iclR; IclR family transcriptional regulator, acetate operon repressor	153	03000	Transcription factors [BR:ko03000],	09182	09180
D|1136176.5.peg.593	1	682492	683490	-	999	467	465	463	402	469	443	263	298	306	273	311	252	314.698	325.37	326.817	296.446	310.102	289.247	398.291	416.839	402.272	418.619	440.22	377.301	359.685	-0.398227	0.0601402	-6.62165	3.55e-11	1.11e-10	Galactose operon repressor%2C GalR-LacI family of transcriptional regulators	NA	K02529	lacI, galR; LacI family transcriptional regulator	193	03000	Transcription factors [BR:ko03000],	09182	09180
D|1136176.5.peg.161	1	208591	209079	-	489	501	486	468	457	532	478	311	304	308	314	352	251	337.61	340.064	330.346	337.004	351.757	312.099	470.983	425.231	404.901	481.489	498.256	375.804	388.795	-0.402412	0.0716175	-5.61891	1.92e-08	5.03e-08	Arginine pathway regulatory protein ArgR%2C repressor of arg regulon	NA	K03402	argR, ahrC; transcriptional regulator of arginine metabolism	42	03000	Transcription factors [BR:ko03000],	09182	09180
D|1136176.5.peg.3690	2	836118	836681	-	564	5184.5	5025.5	5262.5	4935	5863	5856	3765	3581	3511	3536	3148	3029.5	3493.35	3516.1	3714.28	3639.2	3876.61	3823.54	5701.77	5009.06	4615.61	5422.12	4455.99	4535.1	4316.89	-0.430535	0.0674631	-6.38179	1.75e-10	5.2e-10	Mannitol operon repressor	NA	K02562	mtlR; mannitol operon repressor	67	03000	Transcription factors [BR:ko03000],	09182	09180
D|1136176.5.peg.3231	2	333267	333539	-	273	66	66	60	78	80	73	44	40	44	45	40	62	44.4755	46.1816	42.3521	57.5193	52.8959	47.6637	66.6343	55.9515	57.843	69.0032	56.62	92.828	57.4973	-0.449569	0.140823	-3.19243	0.0014108	0.00233639	hypothetical protein	NA	K03557	fis; Fis family transcriptional regulator, factor for inversion stimulation protein	14	05111 03000 03036 03400	Biofilm formation - Vibrio cholerae [PATH:ko05111], Transcription factors [BR:ko03000], Chromosome and associated proteins [BR:ko03036], DNA repair and recombination proteins [BR:ko03400],	09145 09182	09140 09180
D|1136176.5.peg.588	1	676116	677099	-	984	777	790	794	753	874	874	562	517	590	460	620	468	523.598	552.779	560.459	555.283	577.887	570.658	851.101	723.173	775.622	705.366	877.61	700.702	664.52	-0.472247	0.0644794	-7.32399	2.41e-13	8.56e-13	Evolved beta-D-galactosidase transcriptional repressor	NA	K12113	ebgR; LacI family transcriptional regulator, ebg operon repressor	239	03000	Transcription factors [BR:ko03000],	09182	09180
D|1136176.5.peg.191	1	237430	238434	-	1005	954	1029	1042	910	1071	1099	658	711	848	542	749	648	642.873	720.013	735.515	671.059	708.143	717.567	996.485	994.538	1114.79	831.105	1060.21	970.202	846.875	-0.509493	0.0677687	-7.51812	5.56e-14	2.05e-13	Transcriptional (co)regulator CytR	NA	K05499	cytR; LacI family transcriptional regulator, repressor for deo operon, udp, cdd, tsx, nupC, and nupG	261	03000	Transcription factors [BR:ko03000],	09182	09180
D|1136176.5.peg.3532	2	653821	654405	+	585	2205	2209	2117	2146	2379	2281	1423	1423	1488	1750	1404	1538	1485.89	1545.68	1494.32	1582.52	1572.99	1489.33	2155.01	1990.47	1956.15	2683.46	1987.36	2302.73	1853.83	-0.511202	0.0758808	-6.73691	1.62e-11	5.15e-11	Transcriptional regulator%2C TetR family	NA	K16137	nemR; TetR/AcrR family transcriptional regulator, transcriptional repressor for nem operon	45	03000	Transcription factors [BR:ko03000],	09182	09180
D|1136176.5.peg.2432	1	2779451	2780341	-	891	240	228	242	225	266	247	196	176	153	151	168	145	161.729	159.536	170.82	165.921	175.879	161.273	296.825	246.187	201.136	231.544	237.804	217.098	202.146	-0.521032	0.0861442	-6.04837	1.46e-09	4.11e-09	Transcriptional activator NhaR	NA	K03717	nhaR; LysR family transcriptional regulator, transcriptional activator of nhaA	224	03000	Transcription factors [BR:ko03000],	09182	09180
D|1136176.5.peg.1185	1	1351702	1352415	-	714	413	368	377	354	434	374	282	280	243	332	234	216	278.309	257.497	266.112	261.049	286.96	244.195	427.065	391.66	319.451	509.09	331.227	323.401	324.668	-0.528162	0.110829	-4.76558	1.88e-06	4.18e-06	Histidine utilization repressor	NA	K05836	hutC; GntR family transcriptional regulator, histidine utilization repressor	135	03000	Transcription factors [BR:ko03000],	09182	09180
D|1136176.5.peg.3403	2	507801	509261	-	1461	728	678	704	670	738	704	455	493	456	518	538	446	490.578	474.411	496.931	494.076	487.964	459.661	689.059	689.602	599.464	794.304	761.539	667.763	592.113	-0.531987	0.0650982	-8.17207	3.03e-16	1.29e-15	Predicted transcriptional regulator of pyridoxine metabolism	NA	K00375	K00375; GntR family transcriptional regulator / MocR family aminotransferase	150	03000	Transcription factors [BR:ko03000],	09182	09180
D|1136176.5.peg.1076	1	1220930	1221841	-	912	306	339	310	330	307	352	228	224	215	222	212	238	206.205	237.205	218.819	243.351	202.988	229.83	345.287	313.328	282.642	340.416	300.086	356.34	273.041	-0.532299	0.0772763	-6.88827	5.65e-12	1.84e-11	Transcriptional activator MetR	NA	K03576	metR; LysR family transcriptional regulator, regulator for metE and metH	199	03000	Transcription factors [BR:ko03000],	09182	09180
D|1136176.5.peg.3339	2	435548	436549	-	1002	263	277	293	232	271	298	192	198	193	193	190	166	177.228	193.823	206.819	171.083	179.185	194.572	290.768	276.96	253.721	295.947	268.945	248.539	229.799	-0.540334	0.0750217	-7.20236	5.92e-13	2.06e-12	Gluconate utilization system Gnt-I transcriptional repressor	NA	K06145	gntR; LacI family transcriptional regulator, gluconate utilization system Gnt-I transcriptional repressor	209	03000	Transcription factors [BR:ko03000],	09182	09180
D|1136176.5.peg.1806	1	2089256	2090110	+	855	5355	5346	4872	4790	5248	5550	3352	3937	4032	3460	3675	3262	3608.58	3740.71	3438.99	3532.28	3469.97	3623.74	5076.32	5507.03	5300.52	5305.58	5201.96	4883.95	4390.8	-0.546632	0.0363129	-15.0534	3.28e-51	5.21e-50	Phosphogluconate repressor HexR%2C RpiR family	NA	K19337	hexR; RpiR family transcriptional regulator, carbohydrate utilization regulator	240	03000	Transcription factors [BR:ko03000],	09182	09180
D|1136176.5.peg.778	1	869123	869629	+	507	404	409	376	303	418	396	306	270	262	232	258	279	272.244	286.186	265.406	223.441	276.381	258.559	463.411	377.673	344.429	355.75	365.199	417.726	325.534	-0.552536	0.0856244	-6.45302	1.1e-10	3.29e-10	Transcriptional activator RfaH	NA	K05785	rfaH; transcriptional antiterminator RfaH	89	03000	Transcription factors [BR:ko03000],	09182	09180
D|1136176.5.peg.2964	2	8031	9722	-	1692	452	413	426	438	481	472	326	363	352	269	291	307	304.59	288.985	300.7	322.993	318.036	308.182	493.699	507.76	462.744	412.486	411.91	459.648	382.644	-0.576669	0.0647666	-8.90381	5.4e-19	2.67e-18	SgrR%2C sugar-phosphate stress%2C transcriptional activator of SgrS small RNA	NA	K11925	sgrR; SgrR family transcriptional regulator	187	03000	Transcription factors [BR:ko03000],	09182	09180
D|1136176.5.peg.3798	2	944074	945048	+	975	1399.5	1339	1334	1234	1389	1379.5	1049	933	1065.5	877.5	1014.5	886.5	942.746	936.926	941.628	909.985	918.404	900.386	1588.62	1305.07	1400.06	1344.8	1435.32	1326.54	1162.54	-0.59774	0.0498943	-11.9801	4.52e-33	3.83e-32	Chromosome (plasmid) partitioning protein ParB	NA	K03497	parB, spo0J; ParB family transcriptional regulator, chromosome partitioning protein	158	03000 03036 04812	Transcription factors [BR:ko03000], Chromosome and associated proteins [BR:ko03036], Cytoskeleton proteins [BR:ko04812],	09182 09183	09180
D|1136176.5.peg.1933	1	2220382	2221356	-	975	2116	1974	2010	1888	2188	2196	1559	1548	1581	1579	1336	1333	1425.91	1381.25	1418.79	1392.26	1446.7	1433.83	2360.97	2165.32	2078.41	2421.25	1891.11	1995.8	1784.3	-0.602961	0.060431	-9.97767	1.91e-23	1.14e-22	Cys regulon transcriptional activator CysB	NA	K13634	cysB; LysR family transcriptional regulator, cys regulon transcriptional activator	276	03000	Transcription factors [BR:ko03000],	09182	09180
D|1136176.5.peg.847	1	951498	952373	-	876	5750	5670	5458	5159	5938	6103	3911	4004	4471	4246	4307	3916	3874.76	3967.42	3852.63	3804.39	3926.2	3984.81	5922.88	5600.74	5877.64	6510.84	6096.56	5863.14	4940.17	-0.615431	0.0369882	-16.6386	3.66e-62	7.59e-61	Cyn operon transcriptional activator	NA	K10918	aphB; LysR family transcriptional regulator, transcriptional activator AphB	147	05111 03000	Biofilm formation - Vibrio cholerae [PATH:ko05111], Transcription factors [BR:ko03000],	09145 09182	09140 09180
D|1136176.5.peg.1971	1	2263288	2263896	+	609	289	280	312	261	287	313	195	234	268	204	187	201	194.749	195.922	220.231	192.469	189.764	204.366	295.311	327.316	352.317	312.815	264.698	300.942	254.242	-0.632086	0.0759751	-8.31965	8.82e-17	3.88e-16	Transcriptional regulator%2C TetR family	NA	K19736	aefR; TetR/AcrR family transcriptional regulator, regulator of autoinduction and epiphytic fitness	84	03000	Transcription factors [BR:ko03000],	09182	09180
D|1136176.5.peg.3439	2	552013	552384	+	372	144.5	121	123	147.5	136	129.5	101.5	107.5	111.5	109	87.5	92.5	97.0375	84.6662	86.8218	108.402	89.923	84.2276	152.956	149.67	145.922	167.141	123.148	137.745	118.972	-0.669802	0.0997385	-6.71558	1.87e-11	5.93e-11	Transcriptional regulator%2C GntR family	NA	K07979	ytrA; GntR family transcriptional regulator	46	03000	Transcription factors [BR:ko03000],	09182	09180
D|1136176.5.peg.2898	1	3338108	3338998	+	891	80	81	79	72	89	80	75	68	69	49	60	46	53.9097	56.6774	55.7636	53.0948	58.8466	52.2342	113.581	95.1175	90.7084	75.1368	84.93	68.8724	71.5727	-0.677823	0.121013	-5.60126	2.13e-08	5.55e-08	HTH-type transcriptional regulator IlvY	NA	K02521	ilvY; LysR family transcriptional regulator, positive regulator for ilvC	169	03000	Transcription factors [BR:ko03000],	09182	09180
D|1136176.5.peg.2585	1	2962136	2962606	+	471	2058	1952	1886	1789	2070	2028	1584	1498	1560	1730	1292	1359	1386.83	1365.85	1331.27	1319.26	1368.68	1324.14	2398.83	2095.38	2050.8	2652.79	1828.83	2034.73	1763.12	-0.689556	0.0800511	-8.61394	7.06e-18	3.3e-17	Arginine pathway regulatory protein ArgR%2C repressor of arg regulon	NA	K03402	argR, ahrC; transcriptional regulator of arginine metabolism	126	03000	Transcription factors [BR:ko03000],	09182	09180
D|1136176.5.peg.195	1	243272	243592	-	321	175	205	197	175	204	196	156	147	168	134	153	135	117.927	143.443	139.056	129.05	134.884	127.974	236.249	205.622	220.855	205.476	216.571	202.125	173.269	-0.700586	0.0799888	-8.75855	1.98e-18	9.53e-18	Methionine repressor MetJ	NA	K03764	metJ; MetJ family transcriptional regulator, methionine regulon repressor	88	03000	Transcription factors [BR:ko03000],	09182	09180
D|1136176.5.peg.1689	1	1956471	1956968	+	498	224	226	184	182	199	225	185	188	179	85	141	185	150.947	158.137	129.88	134.212	131.578	146.909	280.167	262.972	235.316	130.339	199.585	276.987	186.419	-0.702314	0.150836	-4.65614	3.22e-06	7.01e-06	Zinc uptake regulation protein ZUR	NA	K09823	zur; Fur family transcriptional regulator, zinc uptake regulator	56	02024 03000	Quorum sensing [PATH:ko02024], Transcription factors [BR:ko03000],	09145 09182	09140 09180
D|1136176.5.peg.4255	2	1479774	1480238	+	465	31	25	32	23	27	40	27	21	15	21	32	26	20.89	17.493	22.5878	16.9608	17.8524	26.1171	40.8892	29.3745	19.7192	32.2015	45.296	38.9279	27.3591	-0.748177	0.197455	-3.7891	0.000151	0.000281	Transcriptional regulator%2C AsnC family	NA	K03719	lrp; Lrp/AsnC family transcriptional regulator, leucine-responsive regulatory protein	71	03000 03036	Transcription factors [BR:ko03000], Chromosome and associated proteins [BR:ko03036],	09182	09180
D|1136176.5.peg.210	1	263026	263919	+	894	817	749	748	739	835	812	660	682	630	595	627	578	550.553	524.091	527.989	544.959	552.101	530.177	999.514	953.973	828.207	912.376	887.518	865.396	723.071	-0.752904	0.0512423	-14.693	7.14e-49	1.04e-47	Hydrogen peroxide-inducible genes activator	NA	K04761	oxyR; LysR family transcriptional regulator, hydrogen peroxide-inducible genes activator	206	02026 03000	Biofilm formation - Escherichia coli [PATH:ko02026], Transcription factors [BR:ko03000],	09145 09182	09140 09180
D|1136176.5.peg.2639	1	3046866	3047324	+	459	549.5	598	591.5	557.5	602	648.5	477	522.5	513.5	421	511.5	437	369.955	418.433	417.168	410.747	398.041	423.097	722.376	730.167	674.397	645.563	723.32	654.288	548.963	-0.768484	0.0550632	-13.9564	2.88e-44	3.7e-43	Zinc uptake regulation protein ZUR	NA	K09823	zur; Fur family transcriptional regulator, zinc uptake regulator	70	02024 03000	Quorum sensing [PATH:ko02024], Transcription factors [BR:ko03000],	09145 09182	09140 09180
D|1136176.5.peg.3658	2	804573	805442	-	870	247	255	238	234	249	241	255	180	214	193	169	187	166.446	178.429	167.997	172.558	164.638	157.355	386.176	251.782	281.327	295.947	239.219	279.981	228.488	-0.782241	0.10253	-7.62938	2.36e-14	8.94e-14	Transcriptional regulator%2C AraC family	NA	K13652	K13652; AraC family transcriptional regulator	143	03000	Transcription factors [BR:ko03000],	09182	09180
D|1136176.5.peg.734	1	829485	830027	-	543	151	152.5	169.5	138.5	171	163	143.5	144	134.5	100	138.5	119	101.755	106.358	119.292	101.765	113.065	106.427	216.561	201.425	176.158	153.34	195.339	178.17	147.471	-0.789457	0.0914412	-8.6335	5.95e-18	2.8e-17	Glycine cleavage system transcriptional antiactivator GcvR	NA	K03567	gcvR; glycine cleavage system transcriptional repressor	71	02026 03000	Biofilm formation - Escherichia coli [PATH:ko02026], Transcription factors [BR:ko03000],	09145 09182	09140 09180
D|1136176.5.peg.785	1	879801	880250	-	450	1360	1260	1217	1217	1291	1322	1054	1004	1004	1290	1016	1050	916.465	881.648	859.042	897.449	853.607	863.17	1596.19	1404.38	1319.87	1978.09	1438.15	1572.09	1215.01	-0.819693	0.0866403	-9.46088	3.05e-21	1.69e-20	Ferric uptake regulation protein FUR	NA	K03711	fur, zur, furB; Fur family transcriptional regulator, ferric uptake regulator	125	03000	Transcription factors [BR:ko03000],	09182	09180
D|1136176.5.peg.392	1	439499	440395	+	897	525	477	506	488	515	497	453	404	431	393	420	429	353.782	333.767	357.169	359.865	340.517	324.505	686.03	565.11	566.599	602.628	594.51	642.31	477.233	-0.820251	0.0605298	-13.5512	7.8e-42	9.26e-41	Chromosome initiation inhibitor	NA	K05596	iciA; LysR family transcriptional regulator, chromosome initiation inhibitor	165	03000 03036	Transcription factors [BR:ko03000], Chromosome and associated proteins [BR:ko03036],	09182	09180
D|1136176.5.peg.3324	2	419123	420079	+	957	437	428	473	466	508	470	394	419.5	403	437.5	363.5	380	294.482	299.48	333.876	343.641	335.889	306.876	596.68	586.092	529.79	670.098	513.826	568.946	448.306	-0.855212	0.0732144	-11.6809	1.6e-31	1.29e-30	Transcriptional regulator%2C LysR family	NA	K03566	gcvA; LysR family transcriptional regulator, glycine cleavage system transcriptional activator	53	02026 03000	Biofilm formation - Escherichia coli [PATH:ko02026], Transcription factors [BR:ko03000],	09145 09182	09140 09180
D|1136176.5.peg.3177	2	274161	275087	-	927	513	504	501	474	569	552	465	442	449	452	460	436	345.696	352.659	353.64	349.541	376.222	360.416	704.203	618.264	590.262	693.099	651.13	652.79	503.993	-0.868174	0.0556777	-15.5929	8.14e-55	1.48e-53	LysR-family transcriptional regulator	NA	K21699	bauR; LysR family transcriptional regulator, transcriptional activator for bauABCD operon	51	03000	Transcription factors [BR:ko03000],	09182	09180
D|1136176.5.peg.3143	2	232783	233784	+	1002	1060	1054	1023	998	1021	1080	929	914	993	813	913	888	714.304	737.506	722.103	735.953	675.083	705.161	1406.89	1278.49	1305.41	1246.66	1292.35	1329.54	1012.45	-0.873676	0.0422785	-20.6648	7.19e-95	3.03e-93	Ribose operon repressor	NA	K02529	lacI, galR; LacI family transcriptional regulator	226	03000	Transcription factors [BR:ko03000],	09182	09180
D|1136176.5.peg.1054	1	1199545	1200297	-	753	80	84	89	72	99.5	79.5	76	66	84.5	68	76.5	76.5	53.9097	58.7765	62.8223	53.0948	65.4586	51.5812	115.096	92.32	110.428	104.272	107.578	113.789	82.4271	-0.895421	0.110638	-8.09322	5.81e-16	2.44e-15	Glycerol-3-phosphate regulon repressor%2C DeoR family	NA	K02444	glpR; DeoR family transcriptional regulator, glycerol-3-phosphate regulon repressor	82	03000	Transcription factors [BR:ko03000],	09182	09180
D|1136176.5.peg.936	1	1058424	1059263	+	840	835	801	787	723	854	822	759	803	780	615	751	624	562.683	560.476	555.518	533.16	564.663	536.706	1149.44	1123.23	1025.4	943.044	1063.04	934.269	795.969	-0.913238	0.0585485	-15.598	7.51e-55	1.37e-53	Transcriptional regulator for fatty acid degradation FadR%2C GntR family	NA	K03603	fadR; GntR family transcriptional regulator, negative regulator for fad regulon and positive regulator of fabA	149	03000	Transcription factors [BR:ko03000],	09182	09180
D|1136176.5.peg.1602	1	1872452	1872694	+	243	45	50	49	40	61	53	41	39	61	43	53	46	30.3242	34.986	34.5875	29.4971	40.3331	34.6051	62.091	54.5527	80.1915	65.9364	75.0215	68.8724	50.9165	-0.993701	0.139636	-7.11635	1.11e-12	3.78e-12	Transcriptional regulator%2C AlpA like	NA	K07733	alpA; prophage regulatory protein	21	03000	Transcription factors [BR:ko03000],	09182	09180
D|1136176.5.peg.2370	1	2700720	2701241	-	522	1108.5	1031.5	1119	1074.5	1207.5	1072.5	1799	1210.5	604	1781	592	567.5	746.649	721.412	789.866	791.997	798.066	699.938	2724.43	1692.53	794.027	2730.99	837.976	848.927	1181.4	-1.08202	0.343429	-3.15065	0.00162909	0.00267029	Iron-sulfur cluster regulator IscR	NA	K13643	iscR; Rrf2 family transcriptional regulator, iron-sulfur cluster assembly transcription factor	114	03000	Transcription factors [BR:ko03000],	09182	09180
D|1136176.5.peg.4322	2	1556911	1557501	-	591	259	249	234.5	234	289	249	338.5	265	202.5	295.5	197	218	174.533	174.23	165.173	172.558	191.086	162.579	511.872	370.679	265.552	452.354	278.853	326.395	270.489	-1.08259	0.147642	-7.33256	2.26e-13	8.04e-13	Transcriptional regulator%2C TetR family	NA	K16137	nemR; TetR/AcrR family transcriptional regulator, transcriptional repressor for nem operon	87	03000	Transcription factors [BR:ko03000],	09182	09180
D|1136176.5.peg.3166	2	259976	260980	-	1005	660	594.5	605	582.5	612	592.5	716	647	637.5	694	611	588	444.755	415.634	427.05	429.183	404.653	386.533	1084.32	905.015	837.409	1064.18	864.87	880.369	678.665	-1.16741	0.0756188	-15.4381	9.07e-54	1.57e-52	Fructose repressor FruR%2C LacI family	NA	K03435	fruR1, fruR; LacI family transcriptional regulator, fructose operon transcriptional repressor	191	03000	Transcription factors [BR:ko03000],	09182	09180
D|1136176.5.peg.1930	1	2217018	2217512	-	495	248.5	252.5	224	193.5	246.5	254.5	305	228.5	246	224	238.5	288.5	167.12	176.33	158.114	142.323	162.655	165.843	461.897	318.924	323.395	343.483	336.889	431.201	265.681	-1.18568	0.10416	-11.3833	5.07e-30	3.91e-29	Leucine-responsive regulatory protein%2C regulator for leucine (or lrp) regulon and high-affinity branched-chain amino acid transport system	NA	K03719	lrp; Lrp/AsnC family transcriptional regulator, leucine-responsive regulatory protein	153	03000 03036	Transcription factors [BR:ko03000], Chromosome and associated proteins [BR:ko03036],	09182	09180
D|1136176.5.peg.4048	2	1242226	1243011	-	786	111	114	118	101	145	139	150	168	162	108	133	83	74.7997	79.7682	83.2924	74.4802	95.8737	90.7569	227.162	234.996	212.968	165.608	188.261	124.27	137.686	-1.20942	0.140403	-8.61391	7.06e-18	3.3e-17	Transcriptional regulator KdgR%2C KDG operon repressor	NA	K19333	kdgR; IclR family transcriptional regulator, KDG regulon repressor	179	03000	Transcription factors [BR:ko03000],	09182	09180
D|1136176.5.peg.3918	2	1082244	1083029	-	786	143	146	119	119	163	147	168	174	170	142	140	159	96.3636	102.159	83.9983	87.7539	107.775	95.9803	254.422	243.389	223.484	217.743	198.17	238.059	162.442	-1.25775	0.0900316	-13.9701	2.37e-44	3.08e-43	Glycerol-3-phosphate regulon repressor%2C DeoR family	NA	K02444	glpR; DeoR family transcriptional regulator, glycerol-3-phosphate regulon repressor	172	03000	Transcription factors [BR:ko03000],	09182	09180
D|1136176.5.peg.3616	2	748279	748887	-	609	56	63	63	66	65	78	80	90	100	51	68	59	37.7368	44.0824	44.4697	48.6702	42.9779	50.9283	121.153	125.891	131.461	78.2036	96.254	88.3363	75.8471	-1.25942	0.139902	-9.00212	2.21e-19	1.12e-18	Transcriptional regulator RutR of pyrimidine catabolism (TetR family)	NA	K09017	rutR; TetR/AcrR family transcriptional regulator	116	03000	Transcription factors [BR:ko03000],	09182	09180
D|1136176.5.peg.3841	2	1003188	1003790	+	603	272	286	259	276	319	275	438	346	335	319	307	282	183.293	200.12	182.82	203.53	210.922	179.555	663.314	483.98	440.396	489.156	434.558	422.218	341.155	-1.33744	0.108367	-12.3418	5.4e-35	5e-34	HTH-type transcriptional regulator BetI	NA	K02167	betI; TetR/AcrR family transcriptional regulator, transcriptional repressor of bet genes	116	03000	Transcription factors [BR:ko03000],	09182	09180
D|1136176.5.peg.1992	1	2286810	2287481	+	672	75.5	84.5	75.5	80.5	85	86	202	167	94	74	67.5	85.5	50.5403	58.7765	52.9401	58.9942	56.2018	56.1517	305.912	233.597	123.574	113.472	94.8385	127.264	111.022	-1.58127	0.250124	-6.32194	2.58e-10	7.58e-10	Transcriptional regulator%2C TetR family	NA	K18301	mexL; TetR/AcrR family transcriptional regulator, mexJK operon transcriptional repressor	21	03000 01504	Transcription factors [BR:ko03000], Antimicrobial resistance genes [BR:ko01504],	09182 09183	09180
