# Supplementary material for: Polysaccharide breakdown products drive degradation-dispersal cycles of foraging bacteria through changes in metabolism and motility
Source: eLife. 2024 Oct 21;13:RP93855. doi: 10.7554/eLife.93855 (PMC11493405; doi:10.7554/eLife.93855)
Supplement: Supplementary file 15. [file elife-93855-supp15.xlsx]

## Sheet: Sheet 1
Geneid	Chr	Start	End	Strand	Length	L1_raw	L2_raw	L3_raw	L4_raw	L5_raw	L6_raw	P1_raw	P2_raw	P3_raw	P4_raw	P5_raw	P6_raw	L1_DESeq	L2_DESeq	L3_DESeq	L4_DESeq	L5_DESeq	L6_DESeq	P1_DESeq	P2_DESeq	P3_DESeq	P4_DESeq	P5_DESeq	P6_DESeq	baseMean	log2FoldChange	lfcSE	stat	pvalue	padj	RASTtk_Annotation	RASTtk_Ontology_term	BlastKOALA_KO	BlastKOALA_KO_Definition	BlastKOALA_KO_Score	KEGG_pathway	KEGG_pathway_descr	KEGG_CategB	KEGG_CategA
D|1136176.5.peg.2273	1	2589802	2591160	+	1359	3155	2611	2585	2924	2540	2638	354	282	282	334	223	221	2126.06	1826.97	1824.67	2156.24	1679.44	1722.42	536.103	394.458	370.721	512.157	315.656	330.887	1149.65	2.20531	0.131502	16.7702	4.03e-63	8.66e-62	AmpG permease	NA	K08218	ampG; MFS transporter, PAT family, beta-lactamase induction signal transducer AmpG	277	01501 02000	beta-Lactam resistance [PATH:ko01501], Transporters [BR:ko02000],	09175 09183	09160 09180
D|1136176.5.peg.4373	2	1608017	1611094	+	3078	1282	978	951.5	1188	1071	1084.5	193	182.5	140	175	92	115.5	863.903	684.327	671.281	876.064	708.143	707.773	292.282	254.579	184.046	268.346	130.226	172.181	484.429	1.79469	0.166625	10.7708	4.73e-27	3.26e-26	RND multidrug efflux transporter%3B Acriflavin resistance protein	NA	K18138	acrB, mexB, adeJ, smeE, mtrD, cmeB; multidrug efflux pump	276	01501 01503 02000 01504	beta-Lactam resistance [PATH:ko01501], Cationic antimicrobial peptide (CAMP) resistance [PATH:ko01503], Transporters [BR:ko02000], Antimicrobial resistance genes [BR:ko01504],	09175 09183	09160 09180
D|1136176.5.peg.2063	1	2349372	2350577	-	1206	2265.5	1823.5	1679	1895	1815	1898	504.5	368.5	255	449	135.5	236	1526.32	1275.59	1185.15	1397.42	1200.07	1239.26	763.265	514.754	335.227	688.499	191.092	353.345	889.167	1.45949	0.253353	5.76071	8.38e-09	2.24e-08	Membrane fusion protein of RND family multidrug efflux pump	NA	K03585	acrA, mexA, adeI, smeD, mtrC, cmeA; membrane fusion protein, multidrug efflux system	78	01501 01503 03036 02000 01504	beta-Lactam resistance [PATH:ko01501], Cationic antimicrobial peptide (CAMP) resistance [PATH:ko01503], Chromosome and associated proteins [BR:ko03036], Transporters [BR:ko02000], Antimicrobial resistance genes [BR:ko01504],	09175 09182 09183	09160 09180
D|1136176.5.peg.923	1	1042066	1042968	+	903	660	588.5	522	558	572	594.5	133.5	136.5	133	131	127.5	134	444.755	411.436	368.463	411.484	378.205	387.839	201.417	190.235	174.844	200.876	179.768	200.628	295.829	1.06806	0.0766683	13.9309	4.11e-44	5.25e-43	Oligopeptide transport system permease protein OppC (TC 3.A.1.5.1)	NA	K15582	oppC; oligopeptide transport system permease protein	249	02010 02024 01501 02000	ABC transporters [PATH:ko02010], Quorum sensing [PATH:ko02024], beta-Lactam resistance [PATH:ko01501], Transporters [BR:ko02000],	09131 09145 09175 09183	09130 09140 09160 09180
D|1136176.5.peg.2247	1	2563700	2565592	+	1893	558.5	489.5	462	514.5	537.5	524.5	126	150.5	152.5	134.5	134	102.5	376.02	342.163	326.111	379.038	355.063	342.134	190.816	209.818	199.821	205.476	189.677	152.717	272.405	0.883104	0.0782309	11.2884	1.5e-29	1.13e-28	Penicillin-binding protein 2 (PBP-2)	NA	K05515	mrdA; penicillin-binding protein 2 [EC:3.4.16.4]	409	00550 01501 01011	Peptidoglycan biosynthesis [PATH:ko00550], beta-Lactam resistance [PATH:ko01501], Peptidoglycan biosynthesis and degradation proteins [BR:ko01011],	09107 09175 09181	09100 09160 09180
D|1136176.5.peg.3423	2	534023	535456	-	1434	194	181	170.5	190.5	193.5	194	38.5	49.5	60	57	50	49	130.731	126.649	119.998	140.111	127.611	126.668	57.5478	68.5406	78.8769	87.4041	70.775	73.3641	100.69	0.820796	0.10712	7.66238	1.83e-14	6.98e-14	RND efflux system%2C outer membrane lipoprotein%2C NodT family	NA	K18139	oprM, emhC, ttgC, cusC, adeK, smeF, mtrE, cmeC, gesC; outer membrane protein, multidrug efflux system	37	02024 01501 02000 01504	Quorum sensing [PATH:ko02024], beta-Lactam resistance [PATH:ko01501], Transporters [BR:ko02000], Antimicrobial resistance genes [BR:ko01504],	09145 09175 09183	09140 09160 09180
D|1136176.5.peg.4030	2	1217756	1220893	-	3138	3342.5	3248	3194	3012	3427.5	3374.5	744.5	950.5	1092.5	795	1087	962	2252.08	2272.69	2254.54	2221.13	2265.93	2202.98	1126.72	1328.85	1435.56	1219.06	1538.65	1440.33	1796.54	0.734892	0.067534	10.8818	1.41e-27	9.9e-27	RND efflux system%2C inner membrane transporter CmeB	NA	K18138	acrB, mexB, adeJ, smeE, mtrD, cmeB; multidrug efflux pump	636	01501 01503 02000 01504	beta-Lactam resistance [PATH:ko01501], Cationic antimicrobial peptide (CAMP) resistance [PATH:ko01503], Transporters [BR:ko02000], Antimicrobial resistance genes [BR:ko01504],	09175 09183	09160 09180
D|1136176.5.peg.924	1	1043011	1043982	+	972	702	625.5	566	570.5	619	622	197.5	189.5	221.5	171	170.5	188	473.058	437.325	399.521	420.334	409.282	406.121	298.34	264.371	290.53	262.212	240.635	281.478	348.601	0.63657	0.0710169	8.96363	3.14e-19	1.58e-18	Oligopeptide transport ATP-binding protein OppD (TC 3.A.1.5.1)	NA	K15583	oppD; oligopeptide transport system ATP-binding protein	279	02010 02024 01501 02000	ABC transporters [PATH:ko02010], Quorum sensing [PATH:ko02024], beta-Lactam resistance [PATH:ko01501], Transporters [BR:ko02000],	09131 09145 09175 09183	09130 09140 09160 09180
D|1136176.5.peg.925	1	1043979	1044965	+	987	1249	1137.5	1078	1074.5	1061	1145	387.5	332.5	395.5	331	332.5	315	841.665	795.582	760.926	791.997	701.531	747.601	586.079	464.397	519.273	507.557	469.946	471.626	638.182	0.620319	0.0680802	9.1116	8.12e-20	4.23e-19	Oligopeptide transport ATP-binding protein OppF (TC 3.A.1.5.1)	NA	K10823	oppF; oligopeptide transport system ATP-binding protein	262	02010 02024 01501 02000	ABC transporters [PATH:ko02010], Quorum sensing [PATH:ko02024], beta-Lactam resistance [PATH:ko01501], Transporters [BR:ko02000],	09131 09145 09175 09183	09130 09140 09160 09180
D|1136176.5.peg.4372	2	1606708	1608030	+	1323	87	98	80.5	73	76	86.5	30	19.5	22	35	29	21.5	58.6268	68.5726	56.4695	53.8322	50.2511	56.1517	45.4325	26.577	28.9215	53.6692	41.0495	31.4417	47.5829	0.609184	0.158601	3.84098	0.000123	0.00023	Probable Co/Zn/Cd efflux system membrane fusion protein	NA	K03585	acrA, mexA, adeI, smeD, mtrC, cmeA; membrane fusion protein, multidrug efflux system	40	01501 01503 03036 02000 01504	beta-Lactam resistance [PATH:ko01501], Cationic antimicrobial peptide (CAMP) resistance [PATH:ko01503], Chromosome and associated proteins [BR:ko03036], Transporters [BR:ko02000], Antimicrobial resistance genes [BR:ko01504],	09175 09182 09183	09160 09180
D|1136176.5.peg.2499	1	2865599	2867356	-	1758	437.5	441.5	423.5	417.5	419.5	486	132.5	156	190	135	191	162.5	294.482	308.577	298.582	307.507	277.042	317.323	199.903	218.211	249.777	207.01	270.36	242.551	265.944	0.374902	0.0765615	4.89675	9.74e-07	2.23e-06	Cell division protein FtsI [Peptidoglycan synthetase] (EC 2.4.1.129)	KEGG_ENZYME:2.4.1.129	K03587	ftsI; cell division protein FtsI (penicillin-binding protein 3) [EC:3.4.16.4]	344	00550 01501 01011 03036	Peptidoglycan biosynthesis [PATH:ko00550], beta-Lactam resistance [PATH:ko01501], Peptidoglycan biosynthesis and degradation proteins [BR:ko01011], Chromosome and associated proteins [BR:ko03036],	09107 09175 09181 09182	09100 09160 09180
D|1136176.5.peg.2416	1	2761971	2762960	-	990	55	39	43	47	53	45	15	19	19	19	16	24	37.0629	27.2891	30.3523	34.6591	35.0435	29.3817	22.7162	26.577	24.9777	29.1347	22.648	35.9334	29.648	0.26287	0.179774	1.46222	0.14368	0.178589	Beta N-acetyl-glucosaminidase (EC 3.2.1.52)	KEGG_ENZYME:3.2.1.52	K01207	nagZ; beta-N-acetylhexosaminidase [EC:3.2.1.52]	269	00520 00531 01501	Amino sugar and nucleotide sugar metabolism [PATH:ko00520], Glycosaminoglycan degradation [PATH:ko00531], beta-Lactam resistance [PATH:ko01501],	09101 09107 09175	09100 09160
D|1136176.5.peg.4031	2	1220897	1222060	-	1164	1060.5	1022	1041	1029	1128.5	1111.5	397.5	449.5	416.5	458	411	483	714.304	715.114	734.809	758.813	745.832	725.402	601.223	628.056	546.88	702.299	581.77	723.16	681.472	0.217765	0.0655521	3.32201	0.000894	0.00152241	Membrane fusion protein of RND family multidrug efflux pump	NA	K03585	acrA, mexA, adeI, smeD, mtrC, cmeA; membrane fusion protein, multidrug efflux system	109	01501 01503 03036 02000 01504	beta-Lactam resistance [PATH:ko01501], Cationic antimicrobial peptide (CAMP) resistance [PATH:ko01503], Chromosome and associated proteins [BR:ko03036], Transporters [BR:ko02000], Antimicrobial resistance genes [BR:ko01504],	09175 09182 09183	09160 09180
D|1136176.5.peg.2895	1	3332824	3335946	+	3123	42168.5	38222	37647	37311.5	40221	40397.5	18682	16922.5	16890.5	16369	14795	15360.5	28415.8	26744.7	26573.8	27514.2	26594.1	26376.3	28292.3	23670.3	22203.8	25100.3	20942.3	22997.4	25452.1	0.179889	0.0667311	2.69573	0.00702355	0.0106477	RND multidrug efflux transporter%3B Acriflavin resistance protein	NA	K18138	acrB, mexB, adeJ, smeE, mtrD, cmeB; multidrug efflux pump	1062	01501 01503 02000 01504	beta-Lactam resistance [PATH:ko01501], Cationic antimicrobial peptide (CAMP) resistance [PATH:ko01503], Transporters [BR:ko02000], Antimicrobial resistance genes [BR:ko01504],	09175 09183	09160 09180
D|1136176.5.peg.2894	1	3331706	3332812	+	1107	19588.5	17395	17546	17031	18632	18863.5	9098	8437.5	8180.5	8521	7101.5	7506.5	13199.8	12171.6	12385.2	12559.1	12319.4	12316.2	13778.1	11801.6	10753.5	13066.1	10051.5	11238.2	12136.7	0.084558	0.0735646	1.14944	0.250376	0.294313	Probable Co/Zn/Cd efflux system membrane fusion protein	NA	K03585	acrA, mexA, adeI, smeD, mtrC, cmeA; membrane fusion protein, multidrug efflux system	251	01501 01503 03036 02000 01504	beta-Lactam resistance [PATH:ko01501], Cationic antimicrobial peptide (CAMP) resistance [PATH:ko01503], Chromosome and associated proteins [BR:ko03036], Transporters [BR:ko02000], Antimicrobial resistance genes [BR:ko01504],	09175 09182 09183	09160 09180
D|1136176.5.peg.3544	2	670340	671965	-	1626	1984	1984	2077	1905	2170	2208	883	1001	1072	874	939	894	1336.96	1388.25	1466.09	1404.8	1434.8	1441.66	1337.23	1400.19	1409.27	1340.2	1329.15	1338.52	1385.59	0.0545267	0.03722	1.46499	0.142925	0.17774	Oligopeptide ABC transporter%2C periplasmic oligopeptide-binding protein OppA (TC 3.A.1.5.1)	NA	K15580	oppA, mppA; oligopeptide transport system substrate-binding protein	359	02010 02024 01501 02000	ABC transporters [PATH:ko02010], Quorum sensing [PATH:ko02024], beta-Lactam resistance [PATH:ko01501], Transporters [BR:ko02000],	09131 09145 09175 09183	09130 09140 09160 09180
D|1136176.5.peg.2958	2	2213	4111	+	1899	750	711	687	690	747	734	274	348	395	332	349	344	505.403	497.501	484.931	508.825	493.915	479.248	414.95	486.778	519.273	509.09	494.009	515.046	492.414	0.0135579	0.0557694	0.243107	0.807923	0.836576	Cell division protein FtsI [Peptidoglycan synthetase] (EC 2.4.1.129)	KEGG_ENZYME:2.4.1.129	K05515	mrdA; penicillin-binding protein 2 [EC:3.4.16.4]	345	00550 01501 01011	Peptidoglycan biosynthesis [PATH:ko00550], beta-Lactam resistance [PATH:ko01501], Peptidoglycan biosynthesis and degradation proteins [BR:ko01011],	09107 09175 09181	09100 09160 09180
D|1136176.5.peg.3062	2	138758	140149	+	1392	2247.5	2138.5	2237	2281.5	2353.5	2541	721.5	1212	1403.5	857.5	1275	1184	1514.19	1496	1579.03	1682.07	1555.8	1659.09	1091.89	1695.33	1844.4	1314.13	1804.76	1772.72	1584.12	-0.00608159	0.117661	-0.0516872	0.958778	0.967322	Type I secretion system%2C outer membrane component LapE	NA	K12340	tolC; outer membrane protein	58	03070 02020 04626 05133 01501 01503 02000 02044 01504	Bacterial secretion system [PATH:ko03070], Two-component system [PATH:ko02020], Plant-pathogen interaction [PATH:ko04626], Pertussis [PATH:ko05133], beta-Lactam resistance [PATH:ko01501], Cationic antimicrobial peptide (CAMP) resistance [PATH:ko01503], Transporters [BR:ko02000], Secretion system [BR:ko02044], Antimicrobial resistance genes [BR:ko01504],	09131 09132 09159 09171 09175 09183	09130 09150 09160 09180
D|1136176.5.peg.211	1	264015	266531	-	2517	3775	3662	3671	3383	3986	3873	1614	1778	2211	1655	2022	1813	2543.86	2562.38	2591.24	2494.72	2635.54	2528.79	2444.27	2487.04	2906.61	2537.78	2862.14	2714.47	2609.07	-0.0553813	0.0489992	-1.13025	0.258372	0.302563	Multimodular transpeptidase-transglycosylase (EC 2.4.1.129) (EC 3.4.-.-)	KEGG_ENZYME:2.4.1.129,KEGG_ENZYME:3.4.-.-	K05366	mrcA; penicillin-binding protein 1A [EC:2.4.1.129 3.4.16.4]	518	00550 01501 01003 01011	Peptidoglycan biosynthesis [PATH:ko00550], beta-Lactam resistance [PATH:ko01501], Glycosyltransferases [BR:ko01003], Peptidoglycan biosynthesis and degradation proteins [BR:ko01011],	09107 09175 09181	09100 09160 09180
D|1136176.5.peg.2893	1	3331073	3331687	+	615	7733	7071	6903	6682.5	7488	7454	3997	3882	3460	3703	3084.5	3394	5211.05	4947.72	4872.61	4927.49	4951.05	4866.92	6053.12	5430.09	4548.57	5678.2	4365.4	5081.58	5077.82	-0.0651575	0.0767746	-0.848686	0.396056	0.44451	Transcription regulator of multidrug efflux pump operon%2C TetR (AcrR) family	NA	K18136	acrR; TetR/AcrR family transcriptional regulator, multidrug resistance operon repressor	58	01501 03000	beta-Lactam resistance [PATH:ko01501], Transcription factors [BR:ko03000],	09175 09182	09160 09180
D|1136176.5.peg.922	1	1041131	1042051	+	921	222	225.5	211	174	237	246.5	84.5	108.5	137	73	114.5	147	149.599	157.437	148.938	128.312	156.704	160.62	127.211	151.069	180.102	111.939	161.367	220.092	154.449	-0.0793622	0.132336	-0.599702	0.548705	0.596927	Oligopeptide transport system permease protein OppB (TC 3.A.1.5.1)	NA	K15581	oppB; oligopeptide transport system permease protein	244	02010 02024 01501 02000	ABC transporters [PATH:ko02010], Quorum sensing [PATH:ko02024], beta-Lactam resistance [PATH:ko01501], Transporters [BR:ko02000],	09131 09145 09175 09183	09130 09140 09160 09180
D|1136176.5.peg.4168	2	1380309	1381499	+	1191	222	210.5	180	211	210	211.5	86.5	104.5	124.5	119	97	128	149.599	146.941	127.056	155.597	138.852	137.768	130.24	145.474	163.012	182.475	137.303	191.645	150.497	-0.14998	0.0992993	-1.51038	0.130946	0.164199	RND efflux system%2C membrane fusion protein CmeA	NA	K03585	acrA, mexA, adeI, smeD, mtrC, cmeA; membrane fusion protein, multidrug efflux system	43	01501 01503 03036 02000 01504	beta-Lactam resistance [PATH:ko01501], Cationic antimicrobial peptide (CAMP) resistance [PATH:ko01503], Chromosome and associated proteins [BR:ko03036], Transporters [BR:ko02000], Antimicrobial resistance genes [BR:ko01504],	09175 09182 09183	09160 09180
D|1136176.5.peg.2524	1	2891023	2892348	+	1326	6864	6594	6728	6401	7310	7108	3797	3968	4789	4656	4307	4291	4625.45	4613.96	4749.08	4720.27	4833.36	4641.01	5750.23	5550.39	6295.69	7139.53	6096.56	6424.6	5453.34	-0.402569	0.0569287	-7.07146	1.53e-12	5.17e-12	Type I secretion outer membrane protein%2C TolC precursor	NA	K12340	tolC; outer membrane protein	276	03070 02020 04626 05133 01501 01503 02000 02044 01504	Bacterial secretion system [PATH:ko03070], Two-component system [PATH:ko02020], Plant-pathogen interaction [PATH:ko04626], Pertussis [PATH:ko05133], beta-Lactam resistance [PATH:ko01501], Cationic antimicrobial peptide (CAMP) resistance [PATH:ko01503], Transporters [BR:ko02000], Secretion system [BR:ko02044], Antimicrobial resistance genes [BR:ko01504],	09131 09132 09159 09171 09175 09183	09130 09150 09160 09180
D|1136176.5.peg.921	1	1039396	1041027	+	1632	3413	3562	3394	3027	3617	3608	2393	2692	2965	2003	2984	2617	2299.92	2492.4	2395.72	2232.19	2391.55	2355.76	3624	3765.54	3897.83	3071.41	4223.85	3918.24	3055.7	-0.667601	0.06838	-9.7631	1.62e-22	9.41e-22	Oligopeptide ABC transporter%2C periplasmic oligopeptide-binding protein OppA (TC 3.A.1.5.1)	NA	K15580	oppA, mppA; oligopeptide transport system substrate-binding protein	487	02010 02024 01501 02000	ABC transporters [PATH:ko02010], Quorum sensing [PATH:ko02024], beta-Lactam resistance [PATH:ko01501], Transporters [BR:ko02000],	09131 09145 09175 09183	09130 09140 09160 09180
