# Supplementary material for: Polysaccharide breakdown products drive degradation-dispersal cycles of foraging bacteria through changes in metabolism and motility
Source: eLife. 2024 Oct 21;13:RP93855. doi: 10.7554/eLife.93855 (PMC11493405; doi:10.7554/eLife.93855)
Supplement: Supplementary file 16. [file elife-93855-supp16.xlsx]

## Sheet: Sheet1
Geneid	Chr	Start	End	Strand	Length	log2FoldChange	padj	RASTtk_Annotation	BlastKOALA_KO	BlastKOALA_KO_Definition	dbCAN_HMMER	dbCAN_Hotpep	dbCAN_DIAMOND	dbCAN_Signalp4.1	dbCAN_#ofTools	dbCAN_Activity prediction	dbCAN_Predicted localization	SignalP_5.0	LipoP_1.0	Name_Figure5	Location_Figure5
D|1136176.5.peg.1202	1	1397643	1399409	-	1767	0.590443	3.62e-23	sodium-solute symporter%2C putative	K03307	TC.SSS; solute:Na+ symporter, SSS family										toaA
D|1136176.5.peg.1203	1	1400456	1401082	-	627	0.62164	1.44e-26	4-Hydroxy-2-oxoglutarate aldolase / 2-dehydro-3- deoxyphosphogluconate aldolase	K01625	eda; 2-dehydro-3-deoxyphosphogluconate aldolase / (4S)-4-hydroxy-2-oxoglutarate aldolase [EC:4.1.2.14 4.1.3.42]										eda
D|1136176.5.peg.1204	1	1401156	1402088	-	933	0.632434	1.49e-28	2-dehydro-3-deoxygluconate kinase (EC 2.7.1.45)	K00874	kdgK; 2-dehydro-3-deoxygluconokinase [EC:2.7.1.45]										kdgK
D|1136176.5.peg.1206	1	1402792	1404966	+	2175	0.335468	1.49e-10	poly(beta-D-mannuronate) lyase (EC 4.2.2.3)	K20525	alg17C; oligo-alginate lyase [EC:4.2.2.26]	PL17_2(156-239)+PL17(372-507)	PL17	PL17_2	N	3	PL17-family oligoalginate lyase		other	cytoplasmatic	PL17	cytoplasmic
D|1136176.5.peg.1207	1	1404969	1407122	+	2154	0.158525	0.00186705	poly(beta-D-mannuronate) lyase (EC 4.2.2.3)	K20525	alg17C; oligo-alginate lyase [EC:4.2.2.26]	PL17_2(157-240)+PL17(363-510)	PL17	PL17_2	N	3	PL17-family oligoalginate lyase	Cytoplasmic	other	cytoplasmatic	PL17	cytoplasmic
D|1136176.5.peg.1219	1	1417713	1419491	+	1779	0.909936	3.37e-12	sodium-solute symporter%2C putative	K03307	TC.SSS; solute:Na+ symporter, SSS family										toaB
D|1136176.5.peg.1220	1	1419710	1421788	+	2079	-0.186262	0.00143232	oligo alginate lyase			PL15_1(424-569)	PL15	PL15	N	3	PL15-family oligoalginate lyase	Cytoplasmic	other	cytoplasmatic	PL15	cytoplasmic
D|1136176.5.peg.1221	1	1422382	1423263	+	882	0.446293	2.25e-07	2-hydroxy-3-oxopropionate reductase (EC 1.1.1.60)												dehR
D|1136176.5.peg.1223	1	1426481	1428232	+	1752	0.417954	0.000262	Alginate lyase precursor (EC 4.2.2.3)			PL7(59-286)+PL7(297-582)	PL7	PL7	Y(1-28)	3	PL7-family alginate lyase	Periplasm/Extracellular	LIPO(Sec/SPII)+CS	SpI, SpII	PL7	membrane-bound
D|1136176.5.peg.1224	1	1428656	1430224	+	1569	0.567335	7.97e-08	Alginate lyase precursor (EC 4.2.2.3)			CBM32(48-163)+PL7_5(253-513)	PL7+CBM16+CBM32	CBM32+PL7_5	Y(1-28)	3	PL7-family alginate lyase	Periplasm/Extracellular	LIPO(Sec/SPII)+CS	SpI, SpII	PL7	membrane-bound
D|1136176.5.peg.1226	1	1432932	1433792	-	861	0.171456	0.189461	D01205396: hypothetical protein	K22110	kdgM, kdgN, nanC, ompL; oligogalacturonate-specific porin family protein										kdgM
D|1136176.5.peg.1227	1	1434331	1435368	+	1038	0.884913	2.96e-26	Alginate lyase precursor (EC 4.2.2.3)			PL7_5(34-340)	PL7	PL7_5	Y(1-22)	3	PL7-family alginate lyase	Periplasm/Extracellular, in a membrane	SP(Sec/SPI)+CS	SpI	PL7	secreted
D|1136176.5.peg.1237	1	1448039	1449814	+	1776	0.249031	0.00545125	sodium-solute symporter%2C putative	K03307	TC.SSS; solute:Na+ symporter, SSS family										toaC
D|1136176.5.peg.1238	1	1449925	1451541	+	1617	0.395515	0.000112	Alginate lyase precursor (EC 4.2.2.3)	K01729	algL; poly(beta-D-mannuronate) lyase [EC:4.2.2.3]	PL6(73-458)	PL6	PL6	Y(1-20)	3	PL6 alginate lyase	No signal peptide	LIPO(Sec/SPII)+CS	SpI, SpII	PL6	membrane-bound
D|1136176.5.peg.2313	1	2638961	2639998	-	1038	2.10137	6.16e-30	Alginate lyase precursor (EC 4.2.2.3)			PL7_5(41-341)	PL7	PL7_5	Y(1-21)	3	PL7-family alginate lyase	Periplasm/Extracellular	SP(Sec/SPI)+CS	SpI	PL7	secreted
D|1136176.5.peg.3046	2	104860	105717	+	858	-0.092745	0.341761	Alginate lyase precursor (EC 4.2.2.3)			PL7(47-281)	PL7	PL7	Y(1-21)	3	PL7-family alginate lyase	Periplasm/Extracellular	SP(Sec/SPI)+CS	SpI	PL7	secreted
D|1136176.5.peg.4055	2	1249366	1251372	+	2007	0.354549	7.93e-07	D01220424: hypothetical protein			PL17_1(372-505)	PL17	PL17_1	N	3	PL17-family oligoalginate lyase	Cytoplasmic	other	cytoplasmatic	PL17	cytoplasmic
D|1136176.5.peg.4375	2	1612441	1613457	-	1017	-0.263893	0.168696	Alginate lyase precursor (EC 4.2.2.3)			PL7(65-337)	PL7	PL7	N	3	PL7 alginate lyase	No signal peptide	other OR LIPO(Sec/SPII)+CS OR MAYBE SP(Sec/SPI)+CS	cytoplasmatic	PL7	cytoplasmic
