# Supplementary material for: Polysaccharide breakdown products drive degradation-dispersal cycles of foraging bacteria through changes in metabolism and motility
Source: eLife. 2024 Oct 21;13:RP93855. doi: 10.7554/eLife.93855 (PMC11493405; doi:10.7554/eLife.93855)
Supplement: Supplementary file 17. [file elife-93855-supp17.xlsx]

## Sheet: Sheet1
Geneid	Chr	Start	End	Strand	Length	log2FoldChange	padj	RASTtk_Annotation	BlastKOALA_KO	BlastKOALA_KO_Definition	KEGG_Pathway_Chemotaxis	KEGG_Pathway_Motility
D|1136176.5.peg.2134	1	2443505	2443999	-	495	0.764031	1.44e-34	Positive regulator of CheA protein activity (CheW)	K03408	cheW; purine-binding chemotaxis protein CheW	1	0
D|1136176.5.peg.2135	1	2444054	2445160	-	1107	1.36128	1.39e-75	CheW domain protein	K03408	cheW; purine-binding chemotaxis protein CheW	1	0
D|1136176.5.peg.2137	1	2445940	2447061	-	1122	0.65476	7.28e-21	Chemotaxis response regulator protein-glutamate methylesterase CheB (EC 3.1.1.61)	K03412	cheB; two-component system, chemotaxis family, protein-glutamate methylesterase/glutaminase [EC:3.1.1.61 3.5.1.44]	1	0
D|1136176.5.peg.2138	1	2447075	2449252	-	2178	0.487065	2.63e-32	Signal transduction histidine kinase CheA (EC 2.7.3.-)	K03407	cheA; two-component system, chemotaxis family, sensor kinase CheA [EC:2.7.13.3]	1	0
D|1136176.5.peg.2139	1	2449262	2449993	-	732	0.327935	1.22e-05	Chemotaxis response - phosphatase CheZ	K03414	cheZ; chemotaxis protein CheZ	1	0
D|1136176.5.peg.2140	1	2450100	2450480	-	381	0.694218	1.78e-19	Chemotaxis regulator - transmits chemoreceptor signals to flagelllar motor components CheY	K03413	cheY; two-component system, chemotaxis family, chemotaxis protein CheY	1	0
D|1136176.5.peg.2141	1	2450511	2451245	-	735	0.421207	6.36e-15	RNA polymerase sigma factor for flagellar operon	K02405	fliA, whiG; RNA polymerase sigma factor FliA	0	1
D|1136176.5.peg.2142	1	2451238	2452125	-	888	0.779593	1.38e-32	Flagellar synthesis regulator FleN	K04562	flhG, fleN; flagellar biosynthesis protein FlhG	0	1
D|1136176.5.peg.2143	1	2452139	2453659	-	1521	0.798073	5.74e-24	Flagellar biosynthesis protein FlhF	K02404	flhF; flagellar biosynthesis protein FlhF	0	1
D|1136176.5.peg.2144	1	2453687	2455786	-	2100	0.602478	2.95e-12	Flagellar biosynthesis protein FlhA	K02400	flhA; flagellar biosynthesis protein FlhA	0	1
D|1136176.5.peg.2145	1	2456028	2457158	-	1131	0.0413162	0.687838	Flagellar biosynthesis protein FlhB	K02401	flhB; flagellar biosynthesis protein FlhB	0	1
D|1136176.5.peg.2146	1	2457168	2457950	-	783	0.483424	1.25e-10	Flagellar biosynthesis protein FliR	K02421	fliR; flagellar biosynthesis protein FliR	0	1
D|1136176.5.peg.2147	1	2457957	2458226	-	270	0.496671	0.000475	Flagellar biosynthesis protein FliQ	K02420	fliQ; flagellar biosynthesis protein FliQ	0	1
D|1136176.5.peg.2148	1	2458238	2459098	-	861	0.692572	2.2e-08	Flagellar biosynthesis protein FliP	K02419	fliP; flagellar biosynthesis protein FliP	0	1
D|1136176.5.peg.2149	1	2459154	2459612	-	459	-0.101484	0.375106	Flagellar biosynthesis protein FliQ	K02418	fliO, fliZ; flagellar protein FliO/FliZ	0	1
D|1136176.5.peg.2150	1	2459612	2460022	-	411	0.0967691	0.189186	Flagellar motor switch protein FliN	K02417	fliN; flagellar motor switch protein FliN	1	1
D|1136176.5.peg.2151	1	2460052	2461095	-	1044	0.0572724	0.441813	Flagellar motor switch protein FliM	K02416	fliM; flagellar motor switch protein FliM	1	1
D|1136176.5.peg.2152	1	2461103	2461591	-	489	0.0748828	0.194472	Flagellar biosynthesis protein FliL	K02415	fliL; flagellar protein FliL	0	1
D|1136176.5.peg.2154	1	2464049	2464486	-	438	0.668858	1.39e-06	Flagellar protein FliJ	K02413	fliJ; flagellar protein FliJ	0	1
D|1136176.5.peg.2155	1	2464506	2465825	-	1320	0.437536	4.92e-05	Flagellum-specific ATP synthase FliI	K02412	fliI; flagellum-specific ATP synthase [EC:7.4.2.8]	0	1
D|1136176.5.peg.2156	1	2465825	2466625	-	801	1.02138	7.72e-20	Flagellar assembly protein FliH	K02411	fliH; flagellar assembly protein FliH	0	1
D|1136176.5.peg.2157	1	2466750	2467811	-	1062	0.474563	3.16e-12	Flagellar motor switch protein FliG	K02410	fliG; flagellar motor switch protein FliG	1	1
D|1136176.5.peg.2158	1	2467804	2469486	-	1683	0.322029	1.33e-08	Flagellar M-ring protein FliF	K02409	fliF; flagellar M-ring protein FliF	0	1
D|1136176.5.peg.2159	1	2469563	2469874	-	312	0.240407	5.02e-05	Flagellar hook-basal body complex protein FliE	K02408	fliE; flagellar hook-basal body complex protein FliE	0	1
D|1136176.5.peg.2160	1	2470007	2471416	-	1410	0.536256	1.58e-39	Flagellar regulatory protein FleQ	K10943	flrC, fleR, flaM; two-component system, response regulator FlrC	0	1
D|1136176.5.peg.2161	1	2471450	2472490	-	1041	0.576105	1.44e-12	Flagellar sensor histidine kinase FleS	K10942	flrB, fleS, flaL; two-component system, sensor histidine kinase FlrB [EC:2.7.13.3]	0	1
D|1136176.5.peg.2162	1	2472675	2474141	-	1467	0.633107	2.49e-19	Flagellar regulatory protein FleQ	K10941	flrA, fleQ, flaK; sigma-54 dependent transcriptional regulator, flagellar regulatory protein	0	1
D|1136176.5.peg.2164	1	2474369	2474779	-	411	-0.371288	0.000132	Flagellar biosynthesis protein FliS	K02422	fliS; flagellar secretion chaperone FliS	0	1
D|1136176.5.peg.2166	1	2475101	2477128	-	2028	-0.770455	5.26e-14	Flagellar hook-associated protein FliD	K02407	fliD; flagellar hook-associated protein 2	0	1
D|1136176.5.peg.2167	1	2477151	2477576	-	426	-0.323359	0.00212978	Flagellin protein FlaG	K06603	flaG; flagellar protein FlaG	0	1
D|1136176.5.peg.2168	1	2477657	2478787	-	1131	-0.421609	0.0137558	Flagellin protein FlaA	K02406	fliC, hag; flagellin	0	1
D|1136176.5.peg.2169	1	2479416	2480549	-	1134	1.90991	6.61e-37	Flagellin protein FlaD	K02406	fliC, hag; flagellin	0	1
D|1136176.5.peg.2170	1	2481182	2482318	-	1137	0.67322	1.99e-19	Flagellin protein FlaC	K02406	fliC, hag; flagellin	0	1
D|1136176.5.peg.2171	1	2482757	2483947	-	1191	0.0294838	0.815198	Flagellar hook-associated protein FlgL	K02397	flgL; flagellar hook-associated protein 3 FlgL	0	1
D|1136176.5.peg.2172	1	2483957	2485837	-	1881	0.160349	0.0541812	Flagellar hook-associated protein FlgK	K02396	flgK; flagellar hook-associated protein 1	0	1
D|1136176.5.peg.2173	1	2486059	2486976	-	918	-0.243548	0.00402053	Flagellar protein FlgJ [peptidoglycan hydrolase] (EC 3.2.1.-)	K02395	flgJ; peptidoglycan hydrolase FlgJ	0	1
D|1136176.5.peg.2174	1	2486987	2488078	-	1092	-0.221324	0.000689	Flagellar P-ring protein FlgI	K02394	flgI; flagellar P-ring protein FlgI	0	1
D|1136176.5.peg.2175	1	2488206	2488982	-	777	0.165545	0.115505	Flagellar L-ring protein FlgH	K02393	flgH; flagellar L-ring protein FlgH	0	1
D|1136176.5.peg.2176	1	2489077	2489865	-	789	0.130537	0.164242	Flagellar basal-body rod protein FlgG	K02392	flgG; flagellar basal-body rod protein FlgG	0	1
D|1136176.5.peg.2177	1	2489887	2490636	-	750	0.120069	0.192728	Flagellar basal-body rod protein FlgF	K02391	flgF; flagellar basal-body rod protein FlgF	0	1
D|1136176.5.peg.2178	1	2490909	2492213	-	1305	0.355313	2.72e-30	Flagellar hook protein FlgE	K02390	flgE; flagellar hook protein FlgE	0	1
D|1136176.5.peg.2179	1	2492264	2492977	-	714	0.576145	6.44e-86	Flagellar basal-body rod modification protein FlgD	K02389	flgD; flagellar basal-body rod modification protein FlgD	0	1
D|1136176.5.peg.2180	1	2492995	2493408	-	414	0.0549624	0.29652	Flagellar basal-body rod protein FlgC	K02388	flgC; flagellar basal-body rod protein FlgC	0	1
D|1136176.5.peg.2181	1	2493413	2493808	-	396	0.129693	0.0102636	Flagellar basal-body rod protein FlgB	K02387	flgB; flagellar basal-body rod protein FlgB	0	1
D|1136176.5.peg.2182	1	2494063	2494890	-	828	0.54111	4.22e-08	Chemotaxis protein methyltransferase CheR (EC 2.1.1.80)	K00575	cheR; chemotaxis protein methyltransferase CheR [EC:2.1.1.80]	1	1
D|1136176.5.peg.2183	1	2494902	2495828	-	927	0.0816201	0.572287	Chemotaxis protein CheV (EC 2.7.3.-)	K03415	cheV; two-component system, chemotaxis family, chemotaxis protein CheV	1	1
D|1136176.5.peg.2184	1	2495906	2496652	+	747	2.42271	1.35e-208	Flagellar basal-body P-ring formation protein FlgA	K02386	flgA; flagellar basal body P-ring formation protein FlgA	0	1
D|1136176.5.peg.2185	1	2496790	2497149	+	360	-0.156326	0.0480221	Negative regulator of flagellin synthesis FlgM	K02398	flgM; negative regulator of flagellin synthesis FlgM	0	1
D|1136176.5.peg.2186	1	2497216	2497641	+	426	-0.493391	2.2e-06	Flagellar biosynthesis protein FlgN	K02399	flgN; flagellar biosynthesis protein FlgN	0	1
D|1136176.5.peg.2187	1	2497974	2498405	-	432	-0.177276	0.155528	Flagellar protein FlgP	K09860	flgP; outer membrane protein FlgP	0	1
